# Supplementary material
Source: Preprints.org preprint supplement (doi:10.20944/preprints201908.0280.v1)
Supplement: Supplementary file 1 [file Supplemental Table S1.xlsx]

## Sheet: 10min
	baseMean	log2FoldChange	lfcSE	stat	pvalue	padj
Gh_A03G0420	12421.2	5.77816	0.185668	31.1209	1.26e-212	1.22e-208
Gh_A10G2120	235.699	5.59704	0.355376	15.7496	6.91e-56	2.06e-53
Gh_D03G1171	190.77	5.33294	0.344713	15.4707	5.47e-54	1.56e-51
Gh_D03G1125	11704.5	5.2223	0.159746	32.6913	2.07e-234	4.03e-230
Gh_A03G0405	9960	5.22087	0.201027	25.971	1.05e-148	3.84e-145
Gh_A11G0589	9272.33	5.16539	0.378227	13.6568	1.84e-42	3.37e-40
Gh_D03G1135	7303.45	4.98525	0.218247	22.8422	1.75e-115	3.39e-112
Gh_D06G0147	329.032	4.69953	0.29834	15.7523	6.63e-56	1.99e-53
Gh_D10G2441	143.663	4.51936	0.357453	12.6432	1.22e-36	1.7e-34
Gh_D01G0143	221.436	4.50131	0.356014	12.6436	1.21e-36	1.7e-34
Gh_D11G0676	4098.12	4.42438	0.409701	10.7991	3.48e-27	3.04e-25
Gh_D01G0592	17887.5	4.39514	0.208663	21.0633	1.73e-98	2.29e-95
Gh_A06G1853	376.458	4.34776	0.330775	13.1442	1.84e-39	2.96e-37
Gh_D07G0984	415.939	4.25787	0.254187	16.7509	5.57e-63	2.34e-60
Gh_A09G0270	213.027	4.25303	0.388958	10.9344	7.89e-28	7.09e-26
Gh_A11G1370	1358.3	4.24563	0.149153	28.465	3.18e-178	2.65e-174
Gh_D05G1029	711.507	4.21995	0.21206	19.8998	4.09e-88	4.5e-85
Gh_D09G0277	1039.59	4.16114	0.215668	19.2942	6.01e-83	5.47e-80
Gh_A05G3111	297.588	4.14436	0.237679	17.4368	4.34e-68	2.14e-65
Gh_A06G1442	186.118	4.13041	0.290259	14.2301	5.96e-46	1.24e-43
Gh_A01G0581	11189	4.12032	0.132378	31.1254	1.09e-212	1.22e-208
Gh_D09G0271	192.488	4.09572	0.323793	12.6492	1.13e-36	1.6e-34
Gh_D10G0370	1157.86	4.07373	0.181982	22.3853	5.47e-111	9.97e-108
Gh_A05G0944	527.784	4.05558	0.211582	19.1679	6.87e-82	5.8e-79
Gh_D11G1518	1607.94	4.01101	0.151822	26.4191	8.26e-154	3.21e-150
Gh_A10G0362	2189.07	3.96825	0.189023	20.9935	7.52e-98	9.53e-95
Gh_A10G2119	185.309	3.89418	0.399594	9.74533	1.93e-22	1.25e-20
Gh_A08G2422	123.857	3.81209	0.36177	10.5374	5.81e-26	4.75e-24
Gh_A07G0910	294.566	3.80054	0.246887	15.3938	1.8e-53	5.02e-51
Gh_A12G1695	415.179	3.79952	0.427792	8.88171	6.58e-19	3.31e-17
Gh_A06G1545	920.537	3.78178	0.277288	13.6385	2.36e-42	4.27e-40
Gh_A10G1536	2247.15	3.77324	0.161641	23.3434	1.61e-120	3.75e-117
Gh_D09G0035	3023.39	3.69226	0.338942	10.8935	1.24e-27	1.1e-25
Gh_D10G2568	1641.26	3.68643	0.165101	22.3283	1.96e-110	3.46e-107
Gh_A10G0688	207.66	3.68446	0.269757	13.6584	1.8e-42	3.31e-40
Gh_A03G1059	524.231	3.67232	0.322203	11.3975	4.3e-30	4.45e-28
Gh_D06G1658	153.029	3.62571	0.48178	7.52566	5.25e-14	1.66e-12
Gh_D06G2358	106.902	3.50606	0.306481	11.4397	2.65e-30	2.76e-28
Gh_D06G1179	842.12	3.49887	0.128935	27.1368	3.63e-162	1.92e-158
Gh_D07G1332	59.4479	3.48644	0.439179	7.93855	2.05e-15	7.5e-14
Gh_D05G1190	916.246	3.47335	0.211805	16.3988	1.95e-60	7.2e-58
Gh_D02G0075	2402.84	3.4371	0.158547	21.6787	3.26e-104	5.13e-101
Gh_Sca047584G01	373.856	3.43419	0.233266	14.7222	4.64e-49	1.08e-46
Gh_D12G1857	1017.7	3.3644	0.32395	10.3856	2.88e-25	2.24e-23
Gh_D05G1942	110.135	3.35508	0.354782	9.45673	3.18e-21	1.9e-19
Gh_D05G3432	150.158	3.34251	0.264318	12.6458	1.18e-36	1.66e-34
Gh_D08G2193	1105.55	3.30886	0.16794	19.7027	2.05e-86	2.09e-83
Gh_A03G2087	91.3548	3.29407	0.300612	10.9579	6.09e-28	5.5e-26
Gh_A02G1200	2676.47	3.27353	0.207528	15.7739	4.7e-56	1.43e-53
Gh_A12G1407	766.144	3.24762	0.214598	15.1335	9.74e-52	2.55e-49
Gh_D07G1645	255.032	3.22977	0.198658	16.258	1.96e-59	6.8e-57
Gh_D07G0867	736.425	3.15128	0.183727	17.152	6.08e-66	2.77e-63
Gh_A06G0990	693.316	3.09984	0.161123	19.2389	1.75e-82	1.52e-79
Gh_D06G2104	55.6842	3.06196	0.395158	7.7487	9.28e-15	3.18e-13
Gh_A06G0058	1820.31	3.04329	0.28421	10.7079	9.35e-27	8.06e-25
Gh_A08G0451	276.645	3.01275	0.242782	12.4093	2.33e-35	3.08e-33
Gh_D06G0035	3071.43	2.98329	0.229797	12.9823	1.54e-38	2.37e-36
Gh_A07G0806	878.843	2.97726	0.151007	19.716	1.57e-86	1.64e-83
Gh_A07G1493	571.866	2.96816	0.138568	21.4202	8.66e-102	1.3e-98
Gh_D08G1323	442.734	2.95594	0.342141	8.63955	5.64e-18	2.64e-16
Gh_D10G0335	89.5993	2.95415	0.337375	8.75628	2.02e-18	9.82e-17
Gh_D08G1926	130.676	2.95281	0.215876	13.6783	1.37e-42	2.53e-40
Gh_A09G0276	110.482	2.92232	0.283131	10.3214	5.64e-25	4.29e-23
Gh_A07G2025	1237.35	2.90047	0.167421	17.3244	3.08e-67	1.48e-64
Gh_D13G0785	53.1872	2.89672	0.387385	7.47761	7.57e-14	2.36e-12
Gh_A06G1269	43623	2.88617	0.300826	9.59414	8.46e-22	5.21e-20
Gh_A04G0446	72.5739	2.82976	0.373453	7.57729	3.53e-14	1.13e-12
Gh_A05G2921	235.552	2.8208	0.288926	9.76305	1.62e-22	1.05e-20
Gh_A13G0691	109.622	2.76764	0.288307	9.59963	8.02e-22	4.94e-20
Gh_D12G2112	475.777	2.76687	0.45805	6.04055	1.54e-09	2.71e-08
Gh_A09G0036	1279.5	2.76673	0.393769	7.02629	2.12e-12	5.53e-11
Gh_A13G1409	286.557	2.75211	0.290423	9.47622	2.64e-21	1.58e-19
Gh_D01G1032	37.9858	2.74804	0.457107	6.01181	1.83e-09	3.2e-08
Gh_D05G0228	193.886	2.74247	0.257022	10.6702	1.4e-26	1.19e-24
Gh_A02G0063	1443.8	2.71223	0.113826	23.8278	1.72e-125	4.36e-122
Gh_D12G2092	362.606	2.71074	0.165534	16.3757	2.85e-60	1.04e-57
Gh_D10G0059	367.213	2.69925	0.247187	10.9199	9.26e-28	8.28e-26
Gh_D12G0095	12.6985	2.6916	0.504588	5.33425	9.59e-08	1.28e-06
Gh_D02G0189	87.0112	2.6721	0.349781	7.63934	2.18e-14	7.16e-13
Gh_A01G2049	499.617	2.66095	0.365652	7.27727	3.41e-13	9.87e-12
Gh_A11G1329	54.5027	2.65057	0.325291	8.14833	3.69e-16	1.46e-14
Gh_A01G1006	15.8249	2.64501	0.437986	6.03903	1.55e-09	2.73e-08
Gh_A02G0532	1196.64	2.62662	0.394383	6.66007	2.74e-11	6.11e-10
Gh_D02G0598	1013.47	2.62502	0.401067	6.54509	5.95e-11	1.27e-09
Gh_A03G1592	39.7462	2.61304	0.424799	6.15125	7.69e-10	1.42e-08
Gh_D12G0215	30.3783	2.61197	0.411992	6.33987	2.3e-10	4.55e-09
Gh_A13G1686	484.753	2.60878	0.32677	7.98354	1.42e-15	5.31e-14
Gh_A13G1959	145.596	2.59102	0.246341	10.518	7.14e-26	5.79e-24
Gh_A06G1329	80.6937	2.5865	0.483897	5.34514	9.03e-08	1.22e-06
Gh_D10G1797	234.066	2.56436	0.254796	10.0644	7.94e-24	5.59e-22
Gh_D13G2354	123.264	2.54478	0.252934	10.061	8.21e-24	5.77e-22
Gh_A09G1511	744.549	2.52819	0.194912	12.971	1.79e-38	2.73e-36
Gh_A05G1052	99.5292	2.49172	0.321977	7.73881	1e-14	3.42e-13
Gh_A05G0860	79.047	2.47383	0.331467	7.46328	8.44e-14	2.62e-12
Gh_D02G0603	5.74633	2.4664	0.523764	4.70899	2.49e-06	2.56e-05
Gh_D11G3490	414.84	2.45189	0.147409	16.6333	4e-62	1.65e-59
Gh_A13G0253	766.201	2.43998	0.129096	18.9005	1.13e-79	8.34e-77
Gh_Sca005798G01	2566.82	2.43895	0.131453	18.5538	7.61e-77	5.22e-74
Gh_A08G1045	1049.68	2.43563	0.368761	6.60489	3.98e-11	8.65e-10
Gh_D04G0852	73.5526	2.43516	0.283211	8.59841	8.08e-18	3.74e-16
Gh_A08G0081	62.9079	2.41706	0.371746	6.50192	7.93e-11	1.67e-09
Gh_A12G1497	152.023	2.41437	0.388021	6.22227	4.9e-10	9.27e-09
Gh_A08G0331	518.689	2.40984	0.205647	11.7184	1.03e-31	1.16e-29
Gh_A01G1973	183.897	2.39241	0.212652	11.2504	2.31e-29	2.28e-27
Gh_Sca081746G01	8590.05	2.39162	0.28963	8.25749	1.49e-16	6.15e-15
Gh_A12G1330	237.466	2.37723	0.230747	10.3023	6.88e-25	5.19e-23
Gh_A01G0582	24.8114	2.35544	0.45469	5.18033	2.21e-07	2.79e-06
Gh_D01G1843	181.223	2.34245	0.255764	9.15863	5.26e-20	2.88e-18
Gh_A12G0372	29.9806	2.32804	0.372287	6.25335	4.02e-10	7.68e-09
Gh_D05G0486	196.64	2.32743	0.226989	10.2535	1.14e-24	8.48e-23
Gh_D09G1535	1053.8	2.32135	0.189104	12.2755	1.23e-34	1.56e-32
Gh_D11G1996	738.071	2.31799	0.393956	5.88389	4.01e-09	6.64e-08
Gh_D13G2489	3617.88	2.31519	0.23401	9.89354	4.44e-23	2.98e-21
Gh_D10G2150	6.27502	2.31161	0.505158	4.57602	4.74e-06	4.59e-05
Gh_D07G1930	49.0709	2.31147	0.437063	5.28865	1.23e-07	1.62e-06
Gh_D05G1090	498.518	2.31051	0.23253	9.93643	2.89e-23	1.97e-21
Gh_D11G2732	22.8943	2.30933	0.458124	5.04084	4.63e-07	5.47e-06
Gh_D04G1954	713.434	2.30684	0.195779	11.7829	4.78e-32	5.49e-30
Gh_D10G2486	27.6189	2.3051	0.485985	4.74315	2.1e-06	2.2e-05
Gh_A13G1960	3282.58	2.29522	0.295382	7.77036	7.83e-15	2.7e-13
Gh_D12G1765	40.7764	2.29075	0.363053	6.30967	2.8e-10	5.46e-09
Gh_Sca005103G02	1159.14	2.2899	0.218545	10.4779	1.09e-25	8.74e-24
Gh_D03G0099	319.47	2.28931	0.187027	12.2406	1.89e-34	2.38e-32
Gh_A03G0216	19.0752	2.2879	0.475049	4.81613	1.46e-06	1.58e-05
Gh_D04G0069	498.124	2.28377	0.169703	13.4574	2.79e-41	4.8e-39
Gh_D01G1842	135.649	2.2791	0.288485	7.90024	2.78e-15	1.01e-13
Gh_D05G0504	277.732	2.27666	0.159134	14.3065	1.99e-46	4.22e-44
Gh_D12G1637	71.0596	2.2728	0.482653	4.70897	2.49e-06	2.56e-05
Gh_D02G0838	203.438	2.27192	0.42966	5.28773	1.24e-07	1.63e-06
Gh_A13G1197	740.59	2.26503	0.2232	10.148	3.38e-24	2.44e-22
Gh_D07G2432	42.4134	2.26306	0.474725	4.7671	1.87e-06	1.97e-05
Gh_A07G1227	132.905	2.26057	0.324322	6.97013	3.17e-12	8.07e-11
Gh_Sca013455G01	37.4611	2.24915	0.394919	5.69521	1.23e-08	1.91e-07
Gh_A12G1510	167.151	2.24667	0.195012	11.5207	1.04e-30	1.11e-28
Gh_D11G1841	16.541	2.24037	0.424157	5.28193	1.28e-07	1.68e-06
Gh_D04G1032	17.9312	2.23502	0.384941	5.80613	6.39e-09	1.03e-07
Gh_A05G0109	51.0697	2.23036	0.343654	6.49015	8.58e-11	1.79e-09
Gh_A13G1088	693.981	2.22784	0.260972	8.53669	1.38e-17	6.25e-16
Gh_A01G1324	8344.35	2.22545	0.202041	11.0149	3.24e-28	2.98e-26
Gh_D07G1340	133.575	2.21695	0.480233	4.6164	3.9e-06	3.84e-05
Gh_A11G2030	559.554	2.21127	0.257311	8.59378	8.42e-18	3.89e-16
Gh_A12G2342	51.2948	2.21124	0.476474	4.64083	3.47e-06	3.46e-05
Gh_A10G0070	364.594	2.20903	0.22763	9.70448	2.89e-22	1.85e-20
Gh_D11G1560	44.8199	2.20898	0.334379	6.60622	3.94e-11	8.58e-10
Gh_D10G0568	791.969	2.20808	0.183357	12.0425	2.12e-33	2.58e-31
Gh_A12G1235	25.0171	2.19842	0.376334	5.84168	5.17e-09	8.44e-08
Gh_A09G2289	519.377	2.19785	0.216489	10.1523	3.24e-24	2.34e-22
Gh_A03G0353	95.2598	2.19395	0.360973	6.07788	1.22e-09	2.18e-08
Gh_D11G0764	724.945	2.19359	0.2133	10.2841	8.31e-25	6.22e-23
Gh_A08G1835	485.773	2.19142	0.174164	12.5825	2.64e-36	3.62e-34
Gh_D08G1225	68.0989	2.1789	0.350135	6.22302	4.88e-10	9.24e-09
Gh_A11G0779	49.3623	2.17839	0.323839	6.72677	1.73e-11	3.99e-10
Gh_D09G0591	16.0306	2.17828	0.462991	4.70479	2.54e-06	2.6e-05
Gh_D06G0999	641.344	2.17766	0.190159	11.4518	2.3e-30	2.41e-28
Gh_D01G1297	38.1937	2.17677	0.416337	5.22839	1.71e-07	2.19e-06
Gh_A05G1305	300.074	2.17644	0.17507	12.4318	1.76e-35	2.35e-33
Gh_A02G0420	209.979	2.17271	0.255497	8.50387	1.83e-17	8.2e-16
Gh_D10G1930	1212.45	2.1673	0.183858	11.7879	4.51e-32	5.18e-30
Gh_D04G0855	2650.37	2.1645	0.153681	14.0844	4.74e-45	9.43e-43
Gh_A01G0071	15.7725	2.15199	0.473942	4.54062	5.61e-06	5.33e-05
Gh_D02G1469	121.475	2.15197	0.38895	5.53278	3.15e-08	4.55e-07
Gh_A09G1400	6585.72	2.14841	0.217997	9.85525	6.51e-23	4.29e-21
Gh_A05G1207	250.525	2.14698	0.288237	7.44866	9.43e-14	2.91e-12
Gh_D02G0762	23.0276	2.14664	0.44636	4.80921	1.52e-06	1.63e-05
Gh_Sca101707G01	32.5485	2.14586	0.398879	5.37973	7.46e-08	1.02e-06
Gh_A01G1562	1924.27	2.14202	0.132612	16.1525	1.09e-58	3.63e-56
Gh_A01G2150	129.045	2.14068	0.207344	10.3243	5.47e-25	4.17e-23
Gh_D01G0502	587.615	2.13806	0.359787	5.94256	2.81e-09	4.75e-08
Gh_A11G0575	38.5135	2.12942	0.311365	6.83898	7.98e-12	1.93e-10
Gh_A10G0780	101.469	2.12888	0.272801	7.80377	6.01e-15	2.09e-13
Gh_A11G0506	272.462	2.12657	0.165285	12.866	6.99e-38	1.05e-35
Gh_D12G2676	794.104	2.12105	0.21899	9.68562	3.47e-22	2.21e-20
Gh_A13G0671	30.3324	2.12025	0.422749	5.01539	5.29e-07	6.18e-06
Gh_A09G0275	26.1051	2.11654	0.395482	5.35179	8.71e-08	1.18e-06
Gh_D11G2375	571.541	2.11188	0.222851	9.47664	2.63e-21	1.58e-19
Gh_D05G1475	544.219	2.11046	0.123676	17.0645	2.73e-65	1.22e-62
Gh_A05G0793	16.5912	2.10938	0.452135	4.66539	3.08e-06	3.1e-05
Gh_A05G3538	291.677	2.10926	0.205173	10.2804	8.64e-25	6.46e-23
Gh_D08G0911	67.0639	2.10857	0.317804	6.63483	3.25e-11	7.15e-10
Gh_D05G2403	270.414	2.10817	0.230537	9.14461	5.98e-20	3.26e-18
Gh_D07G1517	214.271	2.10719	0.271044	7.77435	7.58e-15	2.62e-13
Gh_A03G0897	19.2061	2.1016	0.468537	4.48546	7.28e-06	6.75e-05
Gh_A08G2181	476.177	2.10154	0.216444	9.70941	2.75e-22	1.76e-20
Gh_A09G0600	4.71554	2.10055	0.520375	4.03661	5.42e-05	0.000410366
Gh_D06G1595	109.066	2.09915	0.254399	8.25143	1.57e-16	6.45e-15
Gh_A03G0413	25.5329	2.09228	0.389505	5.37164	7.8e-08	1.06e-06
Gh_A11G1551	330.874	2.08244	0.386094	5.39361	6.91e-08	9.48e-07
Gh_D06G0752	53.1915	2.07505	0.325376	6.37739	1.8e-10	3.61e-09
Gh_D05G0843	15.2728	2.07085	0.45393	4.56206	5.07e-06	4.87e-05
Gh_D08G1584	134.485	2.07034	0.2694	7.685	1.53e-14	5.11e-13
Gh_A10G0692	2624.51	2.06912	0.129892	15.9296	3.95e-57	1.27e-54
Gh_D12G1525	1239.68	2.06709	0.219587	9.4135	4.8e-21	2.84e-19
Gh_A05G3992	685.971	2.0641	0.448062	4.60672	4.09e-06	4.01e-05
Gh_A03G1923	843.818	2.05816	0.227218	9.0581	1.33e-19	7.05e-18
Gh_A08G2444	262.485	2.05698	0.207736	9.90186	4.09e-23	2.75e-21
Gh_A13G0918	348.116	2.05034	0.286793	7.14922	8.73e-13	2.38e-11
Gh_D02G0240	57.0828	2.04661	0.331302	6.17748	6.51e-10	1.21e-08
Gh_D09G1522	981.569	2.04489	0.201732	10.1367	3.8e-24	2.73e-22
Gh_D12G1634	148.107	2.04092	0.212374	9.61005	7.25e-22	4.49e-20
Gh_D10G2487	71.7747	2.03989	0.303413	6.72316	1.78e-11	4.08e-10
Gh_D09G0193	24.6034	2.03715	0.386041	5.27703	1.31e-07	1.72e-06
Gh_D03G1485	59.6117	2.0348	0.473362	4.29861	1.72e-05	0.000147195
Gh_D01G2233	232.774	2.03442	0.184595	11.021	3.03e-28	2.79e-26
Gh_A13G2314	35.447	2.02924	0.538494	3.76836	0.000164323	0.0011004
Gh_A05G1282	1837.08	2.02772	0.173503	11.6869	1.49e-31	1.66e-29
Gh_D08G2390	59.2339	2.02753	0.262704	7.71794	1.18e-14	3.99e-13
Gh_D13G1724	514.236	2.02077	0.21596	9.35712	8.19e-21	4.76e-19
Gh_A10G0447	6.27733	2.01905	0.534663	3.77631	0.00015917	0.00107063
Gh_D05G1800	175.656	2.01821	0.312336	6.46167	1.04e-10	2.14e-09
Gh_A05G0178	13.3088	2.00599	0.494169	4.05931	4.92e-05	0.000376886
Gh_A04G1019	57.5045	2.00235	0.290018	6.90422	5.05e-12	1.26e-10
Gh_Sca210283G01	18.1156	2.00047	0.447399	4.47133	7.77e-06	7.17e-05
Gh_D08G0537	548.721	1.99687	0.173191	11.5299	9.32e-31	1e-28
Gh_D07G1178	176.934	1.99486	0.278243	7.16948	7.53e-13	2.07e-11
Gh_A13G1685	244.044	1.99427	0.275209	7.24639	4.28e-13	1.22e-11
Gh_A11G3233	105.409	1.99307	0.272294	7.31957	2.49e-13	7.35e-12
Gh_A09G0482	1750.09	1.99208	0.240554	8.28122	1.22e-16	5.08e-15
Gh_A05G1012	210.181	1.99123	0.24897	7.99787	1.27e-15	4.75e-14
Gh_D07G1887	56.8827	1.99108	0.31135	6.39501	1.61e-10	3.24e-09
Gh_A01G1303	106.526	1.9909	0.302551	6.5804	4.69e-11	1.01e-09
Gh_D03G1296	207.701	1.98797	0.305095	6.5159	7.23e-11	1.53e-09
Gh_A06G1427	117.075	1.98435	0.334023	5.94074	2.84e-09	4.8e-08
Gh_D09G0408	36.1917	1.98063	0.416219	4.75862	1.95e-06	2.05e-05
Gh_A05G3806	618.791	1.97829	0.253935	7.79054	6.67e-15	2.31e-13
Gh_D02G1690	457.951	1.97792	0.296819	6.66371	2.67e-11	5.96e-10
Gh_A10G0107	600.629	1.97437	0.235948	8.36783	5.87e-17	2.5e-15
Gh_D05G0839	68.882	1.97327	0.384664	5.12984	2.9e-07	3.56e-06
Gh_D07G2445	74.6839	1.9695	0.308025	6.39398	1.62e-10	3.26e-09
Gh_D08G0240	264.628	1.96902	0.239823	8.21031	2.21e-16	8.97e-15
Gh_D09G1404	7876.34	1.96322	0.190284	10.3173	5.88e-25	4.47e-23
Gh_D12G1347	96.1231	1.96296	0.328909	5.9681	2.4e-09	4.11e-08
Gh_D10G1831	2013.05	1.96198	0.251618	7.79747	6.32e-15	2.2e-13
Gh_D12G2002	419.476	1.96139	0.27323	7.17854	7.05e-13	1.94e-11
Gh_A07G0514	294.096	1.96022	0.233745	8.38614	5.02e-17	2.15e-15
Gh_A05G1902	197.493	1.95961	0.449742	4.35717	1.32e-05	0.00011538
Gh_A07G0193	1579.34	1.95857	0.153826	12.7323	3.91e-37	5.63e-35
Gh_D11G1017	2246.64	1.9582	0.205078	9.54858	1.31e-21	8e-20
Gh_A11G2550	655.542	1.95688	0.187731	10.4238	1.93e-25	1.52e-23
Gh_A01G0281	479.326	1.9562	0.146234	13.3772	8.22e-41	1.4e-38
Gh_A02G0264	213.693	1.95402	0.367428	5.31811	1.05e-07	1.4e-06
Gh_A12G1858	15.2912	1.95329	0.493217	3.96029	7.49e-05	0.000548722
Gh_D02G1730	745.322	1.95252	0.166869	11.7009	1.26e-31	1.41e-29
Gh_D05G2124	24.2536	1.94639	0.348184	5.59013	2.27e-08	3.36e-07
Gh_A05G1318	56.2867	1.9448	0.304355	6.38991	1.66e-10	3.34e-09
Gh_A03G0088	136.794	1.94252	0.270927	7.1699	7.51e-13	2.06e-11
Gh_A02G1233	46.7547	1.94245	0.337193	5.76064	8.38e-09	1.33e-07
Gh_D08G1934	582.523	1.93704	0.137536	14.0839	4.77e-45	9.46e-43
Gh_D06G1555	7.7968	1.93665	0.521192	3.71581	0.000202555	0.00132247
Gh_D08G0461	30.0745	1.93393	0.380189	5.08676	3.64e-07	4.39e-06
Gh_A13G1047	19.2816	1.93381	0.4533	4.26607	1.99e-05	0.000168182
Gh_A10G0527	591.036	1.9263	0.202496	9.51276	1.86e-21	1.12e-19
Gh_A11G0940	435.6	1.92292	0.152894	12.5768	2.83e-36	3.87e-34
Gh_A02G0445	26.603	1.92091	0.388759	4.94112	7.77e-07	8.81e-06
Gh_A12G1622	24.7117	1.91838	0.396127	4.84285	1.28e-06	1.39e-05
Gh_D11G0807	265.006	1.91811	0.193116	9.93243	3.01e-23	2.04e-21
Gh_D09G0024	228.592	1.91703	0.149922	12.7869	1.94e-37	2.84e-35
Gh_A03G0601	259.924	1.91682	0.158968	12.0579	1.76e-33	2.15e-31
Gh_D01G1992	123.398	1.91666	0.253531	7.55985	4.04e-14	1.29e-12
Gh_A07G0760	6.57496	1.91623	0.53579	3.57646	0.000348283	0.0021194
Gh_D13G0246	4.61869	1.91539	0.530438	3.61095	0.000305074	0.00188719
Gh_A03G1141	69.2627	1.91487	0.365523	5.23871	1.62e-07	2.08e-06
Gh_D01G1972	6.85933	1.91327	0.522397	3.66248	0.000249786	0.0015885
Gh_A08G0932	239.845	1.91217	0.226176	8.45434	2.81e-17	1.24e-15
Gh_A09G2343	21.6597	1.91205	0.413346	4.62577	3.73e-06	3.69e-05
Gh_A09G1180	89.5056	1.90665	0.34669	5.49959	3.81e-08	5.43e-07
Gh_A03G0271	572.232	1.9064	0.26006	7.3306	2.29e-13	6.8e-12
Gh_D11G0606	137.34	1.90622	0.238696	7.98597	1.39e-15	5.21e-14
Gh_A08G0686	190.581	1.90405	0.211862	8.98722	2.54e-19	1.32e-17
Gh_A08G1957	50.991	1.90309	0.452085	4.20959	2.56e-05	0.00020994
Gh_A10G1673	823.665	1.90187	0.21678	8.77329	1.74e-18	8.51e-17
Gh_D05G2138	895.137	1.90039	0.36688	5.17987	2.22e-07	2.79e-06
Gh_A12G1931	624.731	1.89902	0.433456	4.38112	1.18e-05	0.000104497
Gh_D02G1271	825.527	1.8984	0.257692	7.36696	1.75e-13	5.24e-12
Gh_A05G0164	363.079	1.89825	0.286267	6.63104	3.33e-11	7.32e-10
Gh_A11G2802	35.4294	1.89552	0.39617	4.78462	1.71e-06	1.82e-05
Gh_A09G0128	77.583	1.8883	0.294422	6.41359	1.42e-10	2.89e-09
Gh_A03G0291	1013.41	1.88538	0.414659	4.54682	5.45e-06	5.2e-05
Gh_D05G0171	47.8995	1.88322	0.385441	4.88588	1.03e-06	1.14e-05
Gh_A01G1662	715.768	1.87949	0.167752	11.204	3.9e-29	3.81e-27
Gh_A05G0980	428.249	1.87897	0.20861	9.00709	2.12e-19	1.11e-17
Gh_D08G1220	86.5621	1.877	0.286487	6.55178	5.69e-11	1.21e-09
Gh_A08G1621	407.662	1.87594	0.173739	10.7974	3.54e-27	3.09e-25
Gh_A10G0583	1627.64	1.87541	0.17702	10.5943	3.17e-26	2.62e-24
Gh_A13G2244	32.4957	1.87098	0.376254	4.97264	6.6e-07	7.58e-06
Gh_A08G1990	240.847	1.86736	0.23873	7.82206	5.2e-15	1.83e-13
Gh_D02G0593	77.6966	1.86312	0.274086	6.79758	1.06e-11	2.52e-10
Gh_D13G0111	18.5121	1.86291	0.496477	3.75225	0.000175256	0.00116326
Gh_D06G0727	12.7156	1.86286	0.477986	3.89731	9.73e-05	0.000691843
Gh_A07G1125	58.8597	1.85718	0.305805	6.07309	1.25e-09	2.25e-08
Gh_A08G2306	184.362	1.85531	0.220667	8.40774	4.18e-17	1.8e-15
Gh_D12G0748	51.5708	1.8549	0.316423	5.86208	4.57e-09	7.52e-08
Gh_A06G1267	99.3705	1.85297	0.245048	7.56167	3.98e-14	1.27e-12
Gh_D07G0523	1262.53	1.85241	0.228464	8.10811	5.14e-16	2.01e-14
Gh_A02G1347	40.0991	1.85052	0.510697	3.62352	0.000290622	0.00181105
Gh_Sca013634G01	881.482	1.84919	0.216677	8.53434	1.41e-17	6.37e-16
Gh_D02G1909	10.0289	1.84747	0.50398	3.66576	0.000246609	0.00157035
Gh_D06G0576	2582.24	1.84517	0.24342	7.58021	3.45e-14	1.11e-12
Gh_D09G0145	4785	1.84098	0.128166	14.3641	8.69e-47	1.86e-44
Gh_D02G2362	504.109	1.84039	0.274443	6.70591	2e-11	4.56e-10
Gh_A07G0093	69.7009	1.8389	0.323451	5.68525	1.31e-08	2.02e-07
Gh_D13G1758	23.6572	1.83835	0.41841	4.39365	1.11e-05	9.92e-05
Gh_A05G3771	168.718	1.83673	0.378463	4.85312	1.22e-06	1.33e-05
Gh_D07G1337	12.0965	1.83332	0.469649	3.90359	9.48e-05	0.000676612
Gh_D02G0915	66.6377	1.83317	0.295703	6.19938	5.67e-10	1.06e-08
Gh_D08G1268	57.6054	1.83247	0.326744	5.60827	2.04e-08	3.05e-07
Gh_D04G0129	69.8623	1.83	0.2725	6.71559	1.87e-11	4.28e-10
Gh_D11G1480	70.5959	1.82977	0.313744	5.83206	5.47e-09	8.9e-08
Gh_A07G1678	395.731	1.82918	0.195608	9.35126	8.66e-21	5e-19
Gh_A11G1504	9.41689	1.82819	0.533639	3.4259	0.000612771	0.00345775
Gh_A07G1741	1414.71	1.82748	0.201677	9.06144	1.29e-19	6.85e-18
Gh_D07G0247	69.1601	1.82516	0.256673	7.11083	1.15e-12	3.1e-11
Gh_D08G1922	6.46309	1.82234	0.523628	3.48021	0.000501018	0.00290741
Gh_D04G0470	42.9295	1.82231	0.432119	4.21714	2.47e-05	0.000203959
Gh_D01G0007	134.762	1.81992	0.251136	7.24674	4.27e-13	1.21e-11
Gh_A06G1901	37.5075	1.81927	0.310401	5.86103	4.6e-09	7.56e-08
Gh_A04G1238	159.997	1.81804	0.222612	8.16683	3.17e-16	1.27e-14
Gh_A05G3819	23.3954	1.81707	0.526679	3.45006	0.00056046	0.00320188
Gh_A04G1165	12.939	1.81553	0.44423	4.08691	4.37e-05	0.000339431
Gh_D11G1706	1127.41	1.81536	0.264602	6.86073	6.85e-12	1.67e-10
Gh_D07G0885	631.912	1.81497	0.144026	12.6017	2.07e-36	2.85e-34
Gh_D05G1129	94.4894	1.81323	0.311226	5.8261	5.67e-09	9.21e-08
Gh_D11G2042	18.4846	1.81206	0.413648	4.38069	1.18e-05	0.000104655
Gh_A06G0496	228.342	1.8119	0.435537	4.16016	3.18e-05	0.000255369
Gh_A07G2365	6.45171	1.80912	0.502206	3.60235	0.000315349	0.0019423
Gh_D01G1811	1147.75	1.80773	0.156531	11.5487	7.5e-31	8.08e-29
Gh_A06G1431	6.10866	1.80676	0.536569	3.36724	0.00075925	0.00416074
Gh_D02G0434	29.0567	1.80529	0.472699	3.8191	0.000133937	0.000919687
Gh_D03G0057	225.046	1.80521	0.221096	8.16485	3.22e-16	1.29e-14
Gh_D02G0472	256.326	1.805	0.235914	7.65109	1.99e-14	6.57e-13
Gh_D10G2429	10.3664	1.80462	0.493392	3.65757	0.000254614	0.0016155
Gh_D03G0450	339.395	1.80425	0.277345	6.50544	7.75e-11	1.63e-09
Gh_D05G1386	101.605	1.80355	0.271368	6.64614	3.01e-11	6.67e-10
Gh_A06G1309	2359.28	1.8032	0.213313	8.45332	2.83e-17	1.25e-15
Gh_D10G0367	48.0742	1.80059	0.411316	4.37763	1.2e-05	0.000105974
Gh_A02G0400	400.519	1.79984	0.433658	4.15037	3.32e-05	0.000265114
Gh_A11G2821	12.4956	1.79803	0.450759	3.98889	6.64e-05	0.000492672
Gh_D12G0276	34.0212	1.79516	0.353264	5.08163	3.74e-07	4.49e-06
Gh_D05G0051	24.4249	1.79308	0.460694	3.89213	9.94e-05	0.000704899
Gh_D06G0758	70.287	1.79239	0.484318	3.70085	0.000214878	0.00139201
Gh_A13G0839	1764.79	1.79193	0.167811	10.6782	1.29e-26	1.1e-24
Gh_A12G2096	968.446	1.79056	0.18617	9.61787	6.72e-22	4.19e-20
Gh_D01G1541	6968.5	1.78888	0.158029	11.32	1.04e-29	1.05e-27
Gh_D10G0326	64.2997	1.78858	0.27324	6.54582	5.92e-11	1.26e-09
Gh_D02G1475	59.7902	1.78731	0.273641	6.53158	6.51e-11	1.38e-09
Gh_A06G1481	866.516	1.7853	0.149773	11.9201	9.3e-33	1.09e-30
Gh_D13G2490	350.159	1.78382	0.243135	7.33676	2.19e-13	6.52e-12
Gh_D02G0837	1101.53	1.78327	0.364009	4.89897	9.63e-07	1.07e-05
Gh_A05G1456	15.7944	1.78306	0.439916	4.05318	5.05e-05	0.000385795
Gh_Sca112508G01	45.2283	1.77983	0.450556	3.9503	7.81e-05	0.000569711
Gh_D10G0414	11.9339	1.77976	0.516518	3.44569	0.000569607	0.00324598
Gh_D05G0911	60.2633	1.77748	0.322354	5.51406	3.51e-08	5.03e-07
Gh_D05G1773	752.752	1.77694	0.241094	7.37035	1.7e-13	5.12e-12
Gh_D13G1493	1005.77	1.77676	0.203563	8.72829	2.59e-18	1.25e-16
Gh_D11G0584	147.147	1.77471	0.194337	9.13211	6.72e-20	3.66e-18
Gh_D11G0842	370.037	1.77311	0.242935	7.29868	2.91e-13	8.49e-12
Gh_A07G1742	3616.43	1.77077	0.207535	8.53238	1.43e-17	6.46e-16
Gh_A07G0992	47.5381	1.7704	0.377495	4.68985	2.73e-06	2.78e-05
Gh_D06G0740	19.806	1.76781	0.450831	3.92123	8.81e-05	0.000634058
Gh_A07G1228	17.9539	1.76476	0.51892	3.40084	0.000671794	0.00374162
Gh_A11G1690	176.686	1.76424	0.364487	4.84033	1.3e-06	1.41e-05
Gh_A01G1840	59.6016	1.76414	0.306791	5.75028	8.91e-09	1.41e-07
Gh_A09G1508	186.519	1.76401	0.462461	3.8144	0.000136514	0.000934519
Gh_D07G1871	231.809	1.76351	0.418368	4.21522	2.5e-05	0.000205379
Gh_D05G0933	545.503	1.76344	0.187473	9.40637	5.14e-21	3.03e-19
Gh_D08G0670	677.041	1.76232	0.176875	9.96363	2.2e-23	1.51e-21
Gh_A07G1824	22.5473	1.75728	0.421891	4.16524	3.11e-05	0.000250195
Gh_A07G1790	20.109	1.75712	0.401851	4.37257	1.23e-05	0.000108231
Gh_A03G0587	65.7759	1.7541	0.29965	5.85383	4.8e-09	7.88e-08
Gh_D02G2086	429.693	1.75406	0.256183	6.8469	7.55e-12	1.83e-10
Gh_D08G2269	44.6389	1.75294	0.375279	4.67104	3e-06	3.03e-05
Gh_D02G2065	29.5705	1.75137	0.395704	4.42596	9.6e-06	8.67e-05
Gh_A05G3404	816.107	1.75114	0.205331	8.52837	1.48e-17	6.68e-16
Gh_D12G2129	105.323	1.7509	0.42385	4.13093	3.61e-05	0.000285744
Gh_A05G1432	27078	1.74836	0.238856	7.31972	2.48e-13	7.34e-12
Gh_A08G1344	721.038	1.74801	0.406775	4.29724	1.73e-05	0.00014798
Gh_D07G1331	248.6	1.74625	0.2403	7.26694	3.68e-13	1.06e-11
Gh_A05G3158	106.832	1.74564	0.335567	5.20206	1.97e-07	2.5e-06
Gh_A10G1496	108.952	1.74325	0.241111	7.23007	4.83e-13	1.36e-11
Gh_D08G1639	839.771	1.74284	0.359322	4.85035	1.23e-06	1.34e-05
Gh_D05G1422	8.62873	1.74267	0.517222	3.36929	0.000753616	0.00413375
Gh_A01G1605	2233.45	1.74177	0.260445	6.68767	2.27e-11	5.11e-10
Gh_D12G1623	301.576	1.74079	0.286668	6.07252	1.26e-09	2.25e-08
Gh_A01G1161	420.007	1.74079	0.169677	10.2594	1.07e-24	7.99e-23
Gh_D06G1374	47.1483	1.7406	0.330801	5.26178	1.43e-07	1.86e-06
Gh_D12G2214	238.177	1.73833	0.155027	11.2131	3.52e-29	3.45e-27
Gh_A11G1412	63.975	1.7383	0.333438	5.21327	1.86e-07	2.36e-06
Gh_D13G0836	4112.52	1.73822	0.170856	10.1736	2.6e-24	1.9e-22
Gh_A08G0935	81.7039	1.73717	0.258529	6.71942	1.82e-11	4.18e-10
Gh_D05G3743	3.63846	1.73702	0.533335	3.2569	0.00112636	0.00581453
Gh_D11G0202	10.2415	1.73655	0.535877	3.24057	0.00119289	0.00611024
Gh_A01G1664	980.691	1.7365	0.11958	14.5217	8.83e-48	1.93e-45
Gh_A04G1245	45.5557	1.73602	0.374246	4.63872	3.51e-06	3.49e-05
Gh_D05G1982	29.0088	1.73516	0.368055	4.7144	2.42e-06	2.5e-05
Gh_A09G0247	40.7644	1.73514	0.365824	4.74308	2.1e-06	2.2e-05
Gh_D09G2247	5.20987	1.73434	0.531666	3.26209	0.00110596	0.00572661
Gh_D08G0931	275.894	1.73289	0.18361	9.43788	3.8e-21	2.26e-19
Gh_Sca068518G01	79.4055	1.73288	0.25641	6.75822	1.4e-11	3.25e-10
Gh_D08G1738	34.7218	1.73222	0.358001	4.83859	1.31e-06	1.42e-05
Gh_A04G0820	3.92059	1.73075	0.534889	3.23572	0.00121336	0.00619561
Gh_A01G0840	10.7811	1.72944	0.535316	3.23069	0.0012349	0.00629235
Gh_D11G1083	747.599	1.72937	0.165954	10.4208	1.99e-25	1.56e-23
Gh_A05G0440	55.375	1.72813	0.316586	5.45862	4.8e-08	6.72e-07
Gh_A12G2633	88.2665	1.72787	0.339744	5.08581	3.66e-07	4.41e-06
Gh_D13G1508	841.123	1.72729	0.335799	5.14381	2.69e-07	3.33e-06
Gh_A03G0597	1921.44	1.72724	0.10902	15.8434	1.56e-56	4.87e-54
Gh_D04G1861	128.663	1.72675	0.251812	6.85729	7.02e-12	1.71e-10
Gh_A10G2178	110.2	1.72536	0.258448	6.67586	2.46e-11	5.53e-10
Gh_D12G0060	270.063	1.72467	0.325511	5.29834	1.17e-07	1.54e-06
Gh_D09G0122	48.5977	1.72376	0.441804	3.90164	9.55e-05	0.000681073
Gh_Sca135309G01	34.0021	1.72362	0.496112	3.47426	0.000512269	0.00296209
Gh_A03G0894	385.365	1.7229	0.255872	6.73344	1.66e-11	3.82e-10
Gh_D10G1422	242.575	1.72249	0.225889	7.62536	2.43e-14	7.95e-13
Gh_D11G2309	630.123	1.7206	0.187544	9.17437	4.54e-20	2.5e-18
Gh_D13G1634	35.5151	1.72052	0.375355	4.58371	4.57e-06	4.44e-05
Gh_A10G1052	33.6048	1.71873	0.362887	4.73628	2.18e-06	2.27e-05
Gh_A12G1912	377.209	1.71864	0.196178	8.76059	1.94e-18	9.48e-17
Gh_D11G2980	46.4177	1.71706	0.37782	4.54464	5.5e-06	5.24e-05
Gh_D09G2428	62.7931	1.71453	0.308862	5.55111	2.84e-08	4.14e-07
Gh_D12G2395	31.4666	1.71381	0.377859	4.5356	5.74e-06	5.45e-05
Gh_A09G2334	153.057	1.71323	0.375721	4.55983	5.12e-06	4.92e-05
Gh_A05G2668	57.8376	1.71267	0.318416	5.37871	7.5e-08	1.02e-06
Gh_A01G1767	2538.99	1.71234	0.151364	11.3127	1.14e-29	1.14e-27
Gh_A10G2124	872.226	1.71187	0.418034	4.09505	4.22e-05	0.00032882
Gh_A12G1422	218.265	1.71065	0.197758	8.6502	5.14e-18	2.41e-16
Gh_D10G2417	3026.6	1.70888	0.214272	7.97529	1.52e-15	5.66e-14
Gh_D09G2346	295.158	1.70867	0.181956	9.39053	5.97e-21	3.51e-19
Gh_D04G1022	51.2367	1.70865	0.297324	5.74675	9.1e-09	1.44e-07
Gh_A05G0133	32.0206	1.70692	0.333027	5.12547	2.97e-07	3.64e-06
Gh_A06G1857	993.146	1.70666	0.160817	10.6124	2.61e-26	2.17e-24
Gh_D12G2529	129.028	1.70664	0.205836	8.2913	1.12e-16	4.68e-15
Gh_A09G1544	209.136	1.7062	0.200804	8.49682	1.95e-17	8.68e-16
Gh_D07G1259	283.33	1.70381	0.324437	5.25158	1.51e-07	1.95e-06
Gh_A13G1390	1739.51	1.70376	0.138286	12.3206	7.02e-35	9.07e-33
Gh_A02G1346	34.1954	1.70134	0.499726	3.40455	0.000662731	0.00369963
Gh_A11G0631	12.6997	1.69943	0.525371	3.23473	0.00121758	0.00621334
Gh_D01G1178	59.3381	1.69888	0.301252	5.63939	1.71e-08	2.58e-07
Gh_A10G2339	28.1664	1.69868	0.349985	4.85357	1.21e-06	1.33e-05
Gh_D12G2102	44.1891	1.69804	0.344136	4.93422	8.05e-07	9.1e-06
Gh_A01G0990	9.24181	1.69768	0.486743	3.48784	0.000486932	0.00283781
Gh_A09G0026	248.516	1.69626	0.176671	9.60121	7.9e-22	4.88e-20
Gh_D10G0122	13.103	1.69396	0.510587	3.31767	0.000907714	0.00483468
Gh_A02G1622	351.832	1.69273	0.166203	10.1847	2.32e-24	1.7e-22
Gh_A05G3470	159.01	1.69183	0.246268	6.86986	6.43e-12	1.57e-10
Gh_A09G0153	3119.61	1.69101	0.148459	11.3904	4.67e-30	4.8e-28
Gh_D12G0344	726.171	1.69099	0.399123	4.23678	2.27e-05	0.000189032
Gh_A05G2181	205.535	1.69055	0.230997	7.31848	2.51e-13	7.4e-12
Gh_A11G1542	394.108	1.69018	0.20071	8.42103	3.73e-17	1.62e-15
Gh_A12G0429	61.1261	1.689	0.336714	5.01613	5.27e-07	6.16e-06
Gh_D03G0950	5.27422	1.68652	0.537205	3.13944	0.00169274	0.00823444
Gh_A12G2560	27.5309	1.68527	0.370288	4.55123	5.33e-06	5.1e-05
Gh_D06G1637	1202.96	1.68507	0.240595	7.00378	2.49e-12	6.44e-11
Gh_D01G1658	63.2938	1.683	0.324499	5.18647	2.14e-07	2.7e-06
Gh_A01G0144	40.68	1.68293	0.383102	4.39292	1.12e-05	9.95e-05
Gh_A01G0431	1024.32	1.68171	0.188459	8.9235	4.52e-19	2.3e-17
Gh_D10G0149	73.1026	1.68047	0.323339	5.19725	2.02e-07	2.56e-06
Gh_A02G0750	1182.67	1.67989	0.271086	6.19686	5.76e-10	1.08e-08
Gh_D13G1068	170.699	1.67873	0.283669	5.9179	3.26e-09	5.47e-08
Gh_A07G1968	133.958	1.67786	0.223923	7.49303	6.73e-14	2.11e-12
Gh_D02G1691	598.591	1.67741	0.20059	8.36235	6.15e-17	2.61e-15
Gh_A04G1480	17.5484	1.67628	0.50757	3.30257	0.000958049	0.00505808
Gh_A07G1418	117.897	1.67544	0.231281	7.24418	4.35e-13	1.24e-11
Gh_D08G0800	177.367	1.67502	0.247444	6.76932	1.29e-11	3.02e-10
Gh_A02G1144	40.2333	1.67427	0.346221	4.83584	1.33e-06	1.44e-05
Gh_D03G0544	806.281	1.67318	0.162266	10.3114	6.26e-25	4.73e-23
Gh_A02G1122	359.929	1.67216	0.288547	5.79512	6.83e-09	1.1e-07
Gh_D03G1283	967.647	1.67086	0.417901	3.99821	6.38e-05	0.000475621
Gh_A11G1250	23.9171	1.67063	0.465047	3.59239	0.000327658	0.00200878
Gh_A03G1290	897.563	1.66906	0.146758	11.3729	5.71e-30	5.84e-28
Gh_A01G0897	361.44	1.66862	0.195614	8.53013	1.46e-17	6.59e-16
Gh_A09G0151	303.883	1.66811	0.471268	3.53963	0.000400692	0.00239802
Gh_D04G1081	19309.4	1.66657	0.160628	10.3753	3.21e-25	2.47e-23
Gh_D10G1425	167.522	1.66625	0.303596	5.48837	4.06e-08	5.75e-07
Gh_A11G2902	1553.79	1.66623	0.208973	7.97341	1.54e-15	5.75e-14
Gh_D13G1162	906.322	1.6641	0.354134	4.69906	2.61e-06	2.67e-05
Gh_D01G0438	859.718	1.66385	0.191433	8.69156	3.58e-18	1.71e-16
Gh_D02G1910	49.8805	1.66137	0.262923	6.31886	2.63e-10	5.17e-09
Gh_D10G1077	113.618	1.66122	0.228495	7.27027	3.59e-13	1.03e-11
Gh_D05G1283	768.744	1.66007	0.240446	6.90413	5.05e-12	1.26e-10
Gh_A10G1990	36.9595	1.65925	0.397639	4.17274	3.01e-05	0.000243138
Gh_D11G2913	838.398	1.65677	0.204232	8.1122	4.97e-16	1.95e-14
Gh_A12G0155	76.2883	1.65673	0.25262	6.55818	5.45e-11	1.16e-09
Gh_A10G0603	3041.71	1.65624	0.103321	16.03	7.88e-58	2.61e-55
Gh_D08G2355	501.811	1.65617	0.194452	8.5171	1.64e-17	7.34e-16
Gh_D05G3327	273.943	1.65286	0.195823	8.44061	3.16e-17	1.38e-15
Gh_A02G0176	83.439	1.65248	0.261568	6.31759	2.66e-10	5.21e-09
Gh_A10G0323	97.2134	1.65204	0.226077	7.30743	2.72e-13	7.97e-12
Gh_D05G1453	1183.08	1.65162	0.188725	8.75146	2.11e-18	1.02e-16
Gh_D07G1832	5152.56	1.65113	0.188379	8.76493	1.87e-18	9.13e-17
Gh_D03G0304	72.5272	1.64964	0.373157	4.42077	9.83e-06	8.85e-05
Gh_A09G2009	4.44106	1.64957	0.53404	3.08885	0.00200934	0.00952346
Gh_D05G3811	266.63	1.6491	0.226197	7.29056	3.09e-13	8.98e-12
Gh_D05G2957	1255.04	1.64685	0.232371	7.08714	1.37e-12	3.65e-11
Gh_A10G1777	165.088	1.64668	0.23145	7.11462	1.12e-12	3.02e-11
Gh_D08G0322	161.097	1.6436	0.207144	7.93457	2.11e-15	7.73e-14
Gh_A04G0438	3.26991	1.64343	0.528905	3.10724	0.00188844	0.00903638
Gh_A12G1874	652.381	1.64341	0.191454	8.58385	9.17e-18	4.23e-16
Gh_D11G2981	109.748	1.64335	0.226497	7.25553	4e-13	1.15e-11
Gh_A05G2699	102.675	1.64298	0.208011	7.89851	2.82e-15	1.02e-13
Gh_A10G0366	18.9094	1.64283	0.532733	3.08378	0.00204386	0.0096643
Gh_A10G1372	114.47	1.64214	0.232915	7.05038	1.78e-12	4.69e-11
Gh_D13G2355	1396.46	1.64198	0.325045	5.05155	4.38e-07	5.19e-06
Gh_D08G0647	29.8817	1.64113	0.353268	4.64555	3.39e-06	3.39e-05
Gh_D06G1752	216.984	1.64106	0.182621	8.98618	2.56e-19	1.33e-17
Gh_D01G0184	134	1.64072	0.280008	5.85953	4.64e-09	7.63e-08
Gh_A09G0015	7.05311	1.64028	0.530694	3.09083	0.001996	0.00947022
Gh_A06G0365	355.802	1.63959	0.188648	8.69127	3.58e-18	1.71e-16
Gh_A03G1568	89.3995	1.63919	0.240454	6.81705	9.29e-12	2.22e-10
Gh_D12G0901	34.83	1.63733	0.365081	4.48485	7.3e-06	6.77e-05
Gh_A07G0158	117.16	1.63705	0.353678	4.62863	3.68e-06	3.64e-05
Gh_D07G1889	480.051	1.63354	0.194124	8.41492	3.93e-17	1.7e-15
Gh_Sca140553G01	17.3746	1.63223	0.45857	3.55939	0.000371719	0.00224328
Gh_D05G3929	699.492	1.6312	0.432845	3.76855	0.000164201	0.00109978
Gh_D06G0086	209.455	1.62806	0.270879	6.01028	1.85e-09	3.23e-08
Gh_A07G1080	142.908	1.62781	0.278746	5.83976	5.23e-09	8.53e-08
Gh_A06G0110	237.974	1.62683	0.231044	7.04121	1.91e-12	5e-11
Gh_A01G1167	63.0967	1.6253	0.30823	5.27303	1.34e-07	1.75e-06
Gh_D01G0342	445.129	1.625	0.198931	8.16867	3.12e-16	1.25e-14
Gh_A10G0594	2800.04	1.62379	0.144531	11.2348	2.75e-29	2.71e-27
Gh_D02G1752	3.18471	1.62364	0.530765	3.05906	0.00222033	0.0103742
Gh_Sca008153G01	100.435	1.62268	0.236794	6.85273	7.25e-12	1.76e-10
Gh_D07G0155	318.24	1.62116	0.241894	6.70194	2.06e-11	4.67e-10
Gh_D02G0453	1113.02	1.62049	0.422497	3.83552	0.000125301	0.000867021
Gh_A05G0462	884.813	1.62025	0.363373	4.45891	8.24e-06	7.55e-05
Gh_D11G2349	52.4985	1.62019	0.307395	5.27072	1.36e-07	1.77e-06
Gh_D07G1232	54.0225	1.61994	0.287672	5.63119	1.79e-08	2.7e-07
Gh_A13G0346	17.3289	1.61956	0.464385	3.48754	0.000487477	0.00284014
Gh_A07G2037	240.01	1.61838	0.196321	8.24356	1.67e-16	6.88e-15
Gh_D07G1010	283.111	1.61811	0.337557	4.79358	1.64e-06	1.75e-05
Gh_A10G2137	47.0318	1.61541	0.311261	5.18988	2.1e-07	2.66e-06
Gh_A11G0723	332.901	1.61485	0.2374	6.80223	1.03e-11	2.44e-10
Gh_A12G0458	143.334	1.61387	0.254945	6.33027	2.45e-10	4.82e-09
Gh_A07G1093	97.7883	1.6132	0.314187	5.13451	2.83e-07	3.48e-06
Gh_D06G1593	39400.1	1.61262	0.282634	5.70568	1.16e-08	1.8e-07
Gh_D07G2223	13.9944	1.61212	0.536558	3.00456	0.00265964	0.0120839
Gh_D06G1195	75.0767	1.61204	0.29107	5.53835	3.05e-08	4.42e-07
Gh_D02G1866	68.7188	1.61188	0.319034	5.05236	4.36e-07	5.17e-06
Gh_A09G1638	13.3575	1.6111	0.476829	3.37878	0.000728091	0.0040108
Gh_Sca005520G01	8.30749	1.6095	0.462686	3.4786	0.000504044	0.00292213
Gh_A08G0680	30.4786	1.609	0.359662	4.47365	7.69e-06	7.1e-05
Gh_D08G1046	466.808	1.60752	0.206239	7.79443	6.47e-15	2.25e-13
Gh_D02G0497	58.753	1.60676	0.312692	5.13847	2.77e-07	3.42e-06
Gh_A12G2297	7.32664	1.60568	0.513105	3.12934	0.00175198	0.00847804
Gh_A13G1913	8.83504	1.6041	0.510881	3.13987	0.00169024	0.00822366
Gh_A07G1135	14.3417	1.60294	0.499471	3.20928	0.00133067	0.00670532
Gh_Sca076743G01	33.3149	1.60283	0.38305	4.18438	2.86e-05	0.000232006
Gh_D11G0765	5312.46	1.60181	0.097306	16.4615	6.93e-61	2.57e-58
Gh_A07G1124	86.951	1.60164	0.219113	7.30965	2.68e-13	7.85e-12
Gh_A11G1413	1696.49	1.59981	0.172015	9.3004	1.4e-20	7.97e-19
Gh_A05G0814	569.744	1.59892	0.204938	7.80195	6.1e-15	2.12e-13
Gh_A08G1061	83.3367	1.59765	0.305612	5.22769	1.72e-07	2.19e-06
Gh_A12G0322	451.757	1.5974	0.418582	3.81621	0.000135515	0.000929095
Gh_A06G1923	332.469	1.59727	0.254785	6.26909	3.63e-10	6.97e-09
Gh_D08G0845	224.698	1.59632	0.30374	5.25556	1.48e-07	1.92e-06
Gh_Sca015228G01	7.5667	1.5959	0.531907	3.00033	0.00269687	0.0122169
Gh_A09G0944	27.1365	1.59565	0.476576	3.34815	0.000813527	0.00441297
Gh_D11G2758	463.551	1.59273	0.238836	6.66871	2.58e-11	5.78e-10
Gh_D07G2454	54.0756	1.59245	0.386652	4.11855	3.81e-05	0.000300079
Gh_A03G0619	173.286	1.59201	0.223952	7.1087	1.17e-12	3.14e-11
Gh_D10G1206	472.25	1.59166	0.398657	3.99254	6.54e-05	0.000485634
Gh_A12G2077	13.4508	1.59096	0.501297	3.17369	0.00150516	0.00745193
Gh_A05G1448	18.231	1.58974	0.52895	3.00546	0.00265179	0.012052
Gh_D07G2355	32.2387	1.5887	0.352203	4.51075	6.46e-06	6.05e-05
Gh_A11G0873	1497.82	1.58814	0.195342	8.13005	4.29e-16	1.69e-14
Gh_A07G1243	67.0474	1.58813	0.269311	5.89701	3.7e-09	6.15e-08
Gh_A02G0152	80.6362	1.58812	0.302278	5.25383	1.49e-07	1.93e-06
Gh_D12G1101	635.698	1.58734	0.200419	7.9201	2.37e-15	8.64e-14
Gh_A01G1300	9.79269	1.58716	0.530031	2.99446	0.00274928	0.0124244
Gh_A06G0107	702.417	1.58672	0.182227	8.70736	3.11e-18	1.49e-16
Gh_D02G0879	44.3564	1.58513	0.40395	3.92408	8.71e-05	0.000627132
Gh_A11G0479	57.2616	1.58492	0.305688	5.18477	2.16e-07	2.72e-06
Gh_A05G3963	2553.25	1.58416	0.249158	6.35804	2.04e-10	4.06e-09
Gh_A04G1064	4.32344	1.58409	0.53127	2.9817	0.0028665	0.0128802
Gh_A12G2296	390.819	1.58367	0.434473	3.64503	0.000267357	0.00168407
Gh_D13G2428	14.6557	1.58173	0.439711	3.5972	0.000321664	0.0019764
Gh_D05G1630	18.4906	1.57953	0.39525	3.99629	6.43e-05	0.000478926
Gh_A05G1633	150.152	1.57796	0.267539	5.89807	3.68e-09	6.11e-08
Gh_D10G1861	486.205	1.57714	0.305314	5.16563	2.4e-07	2.99e-06
Gh_A10G0467	163.802	1.57611	0.343738	4.58521	4.54e-06	4.42e-05
Gh_D04G0894	6.95827	1.57602	0.530664	2.96991	0.00297886	0.0133041
Gh_D03G0904	89.6132	1.57568	0.259417	6.07393	1.25e-09	2.24e-08
Gh_D13G0991	36.0117	1.57529	0.39511	3.98698	6.69e-05	0.000496469
Gh_A09G0225	106.046	1.57491	0.35008	4.49872	6.84e-06	6.38e-05
Gh_A08G0094	43.1264	1.57449	0.300673	5.23654	1.64e-07	2.1e-06
Gh_A12G1414	838.152	1.57274	0.499833	3.14653	0.00165219	0.00806072
Gh_D02G0432	85.179	1.5726	0.534077	2.94452	0.00323459	0.0142605
Gh_D13G0865	45.3656	1.57227	0.497035	3.16329	0.00155997	0.00768933
Gh_A07G0485	3822.54	1.57084	0.147701	10.6353	2.04e-26	1.72e-24
Gh_D05G3267	457.714	1.57028	0.251897	6.23382	4.55e-10	8.65e-09
Gh_A01G0460	350.04	1.57015	0.2755	5.69926	1.2e-08	1.87e-07
Gh_D13G0048	182.695	1.57006	0.158989	9.87527	5.33e-23	3.56e-21
Gh_D07G0099	35.5154	1.56898	0.45524	3.44648	0.000567935	0.00323803
Gh_D13G0763	122.208	1.56835	0.235333	6.66438	2.66e-11	5.94e-10
Gh_D09G1597	12.3377	1.56732	0.4784	3.27617	0.00105225	0.00548341
Gh_D06G0412	229.717	1.56663	0.162643	9.63231	5.84e-22	3.65e-20
Gh_D12G1393	1118.24	1.56511	0.241907	6.46987	9.81e-11	2.03e-09
Gh_A10G2338	112.66	1.5645	0.231045	6.77143	1.28e-11	2.98e-10
Gh_D06G0571	482.941	1.56413	0.133993	11.6733	1.75e-31	1.94e-29
Gh_A07G1160	74.6662	1.56106	0.319379	4.88782	1.02e-06	1.13e-05
Gh_A02G0528	160.123	1.56039	0.183868	8.48645	2.13e-17	9.47e-16
Gh_D09G1786	15.8249	1.56031	0.458698	3.40161	0.00066991	0.00373256
Gh_D05G2969	22.6922	1.56005	0.457993	3.40628	0.000658541	0.00367871
Gh_D05G3812	148.803	1.55815	0.199941	7.79301	6.54e-15	2.27e-13
Gh_D04G1317	29.9262	1.55758	0.365438	4.26223	2.02e-05	0.000170729
Gh_Sca012173G01	774.954	1.55696	0.195652	7.95783	1.75e-15	6.48e-14
Gh_A08G1934	63.4489	1.55683	0.284455	5.47301	4.42e-08	6.24e-07
Gh_D03G0364	910.154	1.55636	0.135026	11.5264	9.71e-31	1.04e-28
Gh_A05G2514	220.63	1.55514	0.293101	5.30584	1.12e-07	1.48e-06
Gh_A10G1785	32.425	1.55405	0.359613	4.32144	1.55e-05	0.000133916
Gh_A05G0019	27.3155	1.55284	0.495206	3.13575	0.00171415	0.0083226
Gh_A12G2691	76.2496	1.55102	0.221981	6.9872	2.8e-12	7.19e-11
Gh_A03G0543	1887.77	1.54901	0.0788554	19.6437	6.55e-86	6.58e-83
Gh_D13G1850	15.9261	1.54839	0.512209	3.02298	0.00250302	0.0114806
Gh_D06G1554	450.961	1.54782	0.489098	3.16464	0.00155274	0.00765693
Gh_D01G0071	9.7399	1.54475	0.516947	2.9882	0.00280621	0.0126503
Gh_A12G2327	172.566	1.5441	0.173449	8.9023	5.47e-19	2.77e-17
Gh_D08G2020	64.9034	1.54232	0.524091	2.94285	0.00325205	0.0143266
Gh_D13G2170	379.902	1.54081	0.196781	7.8301	4.87e-15	1.72e-13
Gh_D11G0259	11.6488	1.53933	0.478271	3.21854	0.00128847	0.00652882
Gh_A02G0381	53.2635	1.53926	0.490405	3.13876	0.00169666	0.00825085
Gh_D05G3128	129.496	1.53745	0.197922	7.76796	7.98e-15	2.74e-13
Gh_D08G2537	9.89532	1.53619	0.491405	3.12611	0.00177138	0.00856056
Gh_A07G0384	149.995	1.53592	0.258904	5.9324	2.99e-09	5.02e-08
Gh_A10G1549	292.12	1.53388	0.199264	7.69774	1.38e-14	4.65e-13
Gh_D02G0375	180.633	1.53371	0.325103	4.71762	2.39e-06	2.46e-05
Gh_A05G3189	126.022	1.53358	0.254872	6.01705	1.78e-09	3.1e-08
Gh_A02G0237	1593.77	1.53354	0.160587	9.54956	1.3e-21	7.93e-20
Gh_A01G1507	285.56	1.53344	0.344237	4.45462	8.4e-06	7.69e-05
Gh_A13G0339	10.3859	1.5315	0.486295	3.14933	0.00163648	0.00799545
Gh_D06G1972	176.697	1.53147	0.199437	7.67896	1.6e-14	5.35e-13
Gh_A13G1440	12.9863	1.53121	0.49817	3.07367	0.00211445	0.00995123
Gh_A08G0792	2316.99	1.53054	0.142176	10.7651	5.03e-27	4.36e-25
Gh_D08G0136	84.0647	1.53005	0.277248	5.51871	3.42e-08	4.91e-07
Gh_D08G0648	138.668	1.52833	0.224069	6.82078	9.05e-12	2.17e-10
Gh_D09G1113	1772.23	1.52791	0.138441	11.0366	2.55e-28	2.36e-26
Gh_A06G0526	118.995	1.52751	0.219664	6.95385	3.55e-12	8.99e-11
Gh_D05G1030	399.806	1.52706	0.164991	9.25541	2.13e-20	1.2e-18
Gh_D12G0180	1710.6	1.52533	0.186408	8.18276	2.77e-16	1.12e-14
Gh_A07G0459	1641.44	1.5253	0.177036	8.61576	6.95e-18	3.23e-16
Gh_D09G1494	43.3705	1.52361	0.377125	4.04007	5.34e-05	0.000405238
Gh_A02G0889	9.75887	1.52141	0.493985	3.07987	0.0020709	0.00977231
Gh_D01G2081	59.0727	1.52027	0.273903	5.55039	2.85e-08	4.15e-07
Gh_D09G0310	20.6322	1.5202	0.415455	3.65911	0.000253095	0.00160726
Gh_A10G0374	26.7249	1.51913	0.35956	4.22497	2.39e-05	0.000198056
Gh_D10G0695	1300.91	1.51732	0.115295	13.1603	1.48e-39	2.41e-37
Gh_A11G2044	61.5322	1.51726	0.256774	5.90892	3.44e-09	5.75e-08
Gh_D12G1365	73.8227	1.51715	0.355804	4.26401	2.01e-05	0.000169546
Gh_D12G1972	294.346	1.5154	0.513417	2.9516	0.0031613	0.0139988
Gh_D05G3310	244.681	1.51523	0.168937	8.96919	2.99e-19	1.54e-17
Gh_A06G0583	1622.81	1.51514	0.246726	6.141	8.2e-10	1.51e-08
Gh_D12G1667	270.754	1.51449	0.296438	5.10895	3.24e-07	3.94e-06
Gh_A12G1925	607.727	1.51422	0.273419	5.53811	3.06e-08	4.43e-07
Gh_Sca119025G01	23.6002	1.51385	0.384256	3.9397	8.16e-05	0.000592435
Gh_A12G1239	288.282	1.51357	0.307923	4.91541	8.86e-07	9.95e-06
Gh_D05G3407	5.63663	1.5135	0.536418	2.82149	0.00478011	0.0197481
Gh_D10G1706	5.18092	1.51258	0.531028	2.84839	0.00439405	0.0184301
Gh_Sca047995G01	17.6817	1.51251	0.444352	3.40386	0.000664407	0.00370757
Gh_A05G3595	56.0713	1.51235	0.53429	2.83059	0.00464626	0.0193005
Gh_A06G1832	19.2694	1.51209	0.466918	3.23845	0.0012018	0.00614627
Gh_D06G0151	1119.9	1.51154	0.163678	9.23486	2.59e-20	1.45e-18
Gh_D11G0658	361.267	1.51134	0.193828	7.79733	6.32e-15	2.2e-13
Gh_D11G1011	304.33	1.5113	0.358119	4.2201	2.44e-05	0.000201694
Gh_A13G0825	160.942	1.51091	0.377381	4.00369	6.24e-05	0.00046586
Gh_A11G2823	74.6562	1.51078	0.279299	5.40919	6.33e-08	8.74e-07
Gh_A03G1649	43.0297	1.50957	0.337913	4.46734	7.92e-06	7.29e-05
Gh_A08G0938	1055.9	1.50921	0.345537	4.36771	1.26e-05	0.000110499
Gh_A05G3751	68.1025	1.50915	0.407218	3.70599	0.000210563	0.00136664
Gh_D12G0776	42.3299	1.50849	0.385733	3.91072	9.2e-05	0.000659117
Gh_D11G0795	96.1926	1.50784	0.258242	5.83887	5.26e-09	8.57e-08
Gh_D09G0213	32.0218	1.50738	0.486706	3.0971	0.00195424	0.00930695
Gh_D05G3640	31.5969	1.50736	0.388189	3.88307	0.000103148	0.000727901
Gh_A05G2087	318.107	1.50495	0.221521	6.79369	1.09e-11	2.58e-10
Gh_D07G1872	933.073	1.50469	0.264365	5.69174	1.26e-08	1.95e-07
Gh_D01G0200	580.704	1.50376	0.18304	8.21549	2.11e-16	8.6e-15
Gh_A11G3288	109.527	1.50362	0.224089	6.70993	1.95e-11	4.44e-10
Gh_D02G1878	11.3522	1.50214	0.47042	3.1932	0.00140707	0.00703437
Gh_D13G1471	220.305	1.50114	0.318968	4.70623	2.52e-06	2.59e-05
Gh_A08G2502	137.066	1.50057	0.182847	8.20669	2.27e-16	9.24e-15
Gh_Sca078795G01	19.1026	1.5	0.402383	3.7278	0.000193158	0.00126879
Gh_Sca005055G02	56.6765	1.49981	0.238665	6.28416	3.3e-10	6.38e-09
Gh_A04G0281	208.977	1.4998	0.226961	6.6082	3.89e-11	8.47e-10
Gh_A07G0863	1179.07	1.49953	0.14012	10.7017	9.99e-27	8.59e-25
Gh_D08G2362	253.106	1.49817	0.400143	3.74407	0.00018106	0.00119728
Gh_A09G0913	603.424	1.49733	0.286366	5.22874	1.71e-07	2.19e-06
Gh_A03G0410	243.235	1.49658	0.212564	7.04061	1.91e-12	5.02e-11
Gh_D07G1957	659.092	1.49593	0.131123	11.4086	3.79e-30	3.93e-28
Gh_D11G0276	385.414	1.49526	0.211152	7.08144	1.43e-12	3.79e-11
Gh_A09G2077	834.39	1.49496	0.471805	3.1686	0.00153175	0.00756366
Gh_A01G1420	59.9038	1.49478	0.323026	4.62744	3.7e-06	3.66e-05
Gh_A02G0419	181.532	1.49468	0.211574	7.06459	1.61e-12	4.26e-11
Gh_D09G2141	479.021	1.49386	0.312321	4.7831	1.73e-06	1.84e-05
Gh_A06G1802	790.717	1.4938	0.459031	3.25424	0.00113695	0.00586349
Gh_D02G1973	3163.9	1.49362	0.179217	8.33413	7.81e-17	3.31e-15
Gh_D06G1488	98.2517	1.49327	0.237394	6.29028	3.17e-10	6.15e-09
Gh_D01G1841	446.102	1.49271	0.186112	8.0205	1.05e-15	3.97e-14
Gh_D11G0056	44.457	1.49248	0.492214	3.03219	0.00242787	0.0111941
Gh_A03G1505	3023.02	1.49199	0.167636	8.90015	5.58e-19	2.82e-17
Gh_D13G0670	1321.23	1.49092	0.169735	8.78381	1.58e-18	7.77e-17
Gh_A04G0116	784.286	1.49028	0.195771	7.61236	2.69e-14	8.75e-13
Gh_A02G0955	921.672	1.48966	0.230198	6.47123	9.72e-11	2.02e-09
Gh_D05G1416	32.1063	1.48865	0.39144	3.80302	0.000142943	0.000973611
Gh_D08G0788	25.8373	1.48852	0.40193	3.70342	0.000212711	0.00137981
Gh_Sca107204G01	14.7883	1.48821	0.533996	2.78693	0.00532104	0.0216047
Gh_D06G0662	1582.38	1.48788	0.250323	5.94382	2.78e-09	4.71e-08
Gh_D10G1501	9.36847	1.48765	0.481864	3.08727	0.00202002	0.00956863
Gh_A04G1333	38.6021	1.48761	0.300565	4.94938	7.45e-07	8.48e-06
Gh_A11G0925	123.384	1.48757	0.323613	4.59676	4.29e-06	4.2e-05
Gh_D01G1272	6.5834	1.48676	0.528365	2.8139	0.00489451	0.0201422
Gh_A08G0449	152.547	1.48673	0.412297	3.60597	0.000310985	0.00191907
Gh_A05G3692	1417.28	1.48658	0.13978	10.6352	2.04e-26	1.72e-24
Gh_D09G0276	20.8678	1.48624	0.421667	3.52467	0.000424009	0.00252023
Gh_D12G2106	6.52162	1.48596	0.536738	2.76849	0.00563167	0.022653
Gh_D12G0885	525.098	1.4859	0.171431	8.66761	4.41e-18	2.08e-16
Gh_D13G1751	90.6279	1.48551	0.282376	5.26076	1.43e-07	1.87e-06
Gh_A04G0278	27.4974	1.48325	0.3778	3.92601	8.64e-05	0.000622842
Gh_A07G2295	33.6507	1.48319	0.491561	3.0173	0.00255037	0.011662
Gh_A11G0608	13.4409	1.48292	0.50663	2.92703	0.00342216	0.0149563
Gh_A12G1830	499.265	1.48218	0.299428	4.95004	7.42e-07	8.45e-06
Gh_A06G1770	1194.34	1.48075	0.176937	8.36877	5.82e-17	2.48e-15
Gh_D05G2906	229.265	1.48069	0.345501	4.28561	1.82e-05	0.000155297
Gh_A05G3462	42.2288	1.47977	0.349369	4.23555	2.28e-05	0.000189928
Gh_D12G0494	45.4677	1.47976	0.29412	5.03112	4.88e-07	5.73e-06
Gh_A05G3518	65.3733	1.47945	0.290515	5.09251	3.53e-07	4.26e-06
Gh_A09G1477	330.241	1.47911	0.16747	8.83212	1.03e-18	5.11e-17
Gh_A03G1071	834.963	1.47813	0.20828	7.09685	1.28e-12	3.41e-11
Gh_A08G0394	38.3476	1.47713	0.347203	4.25439	2.1e-05	0.000176111
Gh_A01G0978	10.4006	1.47675	0.471985	3.12882	0.00175512	0.00849044
Gh_A07G1676	54.5517	1.47657	0.337437	4.37583	1.21e-05	0.000106773
Gh_A06G1403	1104.14	1.47619	0.210895	6.99965	2.57e-12	6.62e-11
Gh_A09G2258	222.672	1.47603	0.23992	6.15217	7.64e-10	1.41e-08
Gh_D08G1405	1156.4	1.47601	0.1749	8.43913	3.2e-17	1.4e-15
Gh_A12G0329	70.2965	1.47576	0.233125	6.33033	2.45e-10	4.82e-09
Gh_A03G2069	1067.46	1.47564	0.146508	10.072	7.34e-24	5.2e-22
Gh_A04G0723	7.4945	1.47549	0.518676	2.84473	0.00444493	0.0186047
Gh_D06G0115	4.4329	1.47407	0.52823	2.79058	0.00526129	0.0213994
Gh_D09G0223	26.1932	1.47395	0.440676	3.34474	0.000823584	0.00446088
Gh_A06G1409	99.2304	1.47379	0.230896	6.3829	1.74e-10	3.49e-09
Gh_A01G1276	11.9396	1.4731	0.473175	3.11323	0.0018505	0.00888473
Gh_D05G1204	6.14659	1.47271	0.534824	2.75364	0.00589374	0.0235108
Gh_A02G0571	199.91	1.47232	0.159396	9.23688	2.54e-20	1.42e-18
Gh_D04G0438	92.5885	1.47197	0.377071	3.9037	9.47e-05	0.000676372
Gh_A08G2171	19.4139	1.47191	0.388854	3.78524	0.000153558	0.00103767
Gh_D10G1819	58.0879	1.47056	0.365497	4.02347	5.73e-05	0.000431829
Gh_A08G1463	81.0153	1.4699	0.247644	5.93553	2.93e-09	4.94e-08
Gh_D02G0113	3.43247	1.46927	0.515981	2.84753	0.00440599	0.0184735
Gh_D07G1700	1310.61	1.46884	0.199141	7.37589	1.63e-13	4.92e-12
Gh_A04G1367	1852.3	1.46783	0.202314	7.25517	4.01e-13	1.15e-11
Gh_A04G0539	294.37	1.46681	0.186527	7.8638	3.73e-15	1.33e-13
Gh_A04G0875	129.435	1.46603	0.209607	6.99417	2.67e-12	6.87e-11
Gh_A03G0935	6741.19	1.46535	0.122525	11.9597	5.78e-33	6.85e-31
Gh_D12G1541	191.458	1.46528	0.187012	7.83526	4.68e-15	1.65e-13
Gh_D05G2938	204.282	1.46518	0.191559	7.64869	2.03e-14	6.69e-13
Gh_A06G1933	3.32698	1.46402	0.534647	2.73828	0.00617608	0.0244381
Gh_A08G1370	35.0582	1.46281	0.37067	3.94639	7.93e-05	0.000578282
Gh_D07G1560	80.2269	1.46269	0.419835	3.48397	0.000494032	0.00287144
Gh_D13G1674	205.137	1.46167	0.183402	7.96976	1.59e-15	5.91e-14
Gh_A10G1464	27.18	1.46105	0.490017	2.98164	0.00286707	0.0128818
Gh_D02G0631	177.95	1.46077	0.215393	6.78189	1.19e-11	2.79e-10
Gh_A09G1980	45.6176	1.4607	0.443128	3.29635	0.000979516	0.00515462
Gh_A05G1616	82.182	1.46049	0.355307	4.11048	3.95e-05	0.000309749
Gh_Sca139902G01	9.30927	1.45959	0.513997	2.83968	0.00451582	0.0188486
Gh_D05G1983	18.9199	1.45941	0.419539	3.47859	0.000504056	0.00292213
Gh_A02G0718	42.3308	1.45861	0.320995	4.54404	5.52e-06	5.26e-05
Gh_D13G0308	9.51001	1.45831	0.535703	2.72224	0.00648417	0.0254465
Gh_A11G1986	477.14	1.45786	0.324015	4.49936	6.82e-06	6.36e-05
Gh_Sca071191G01	63.7279	1.45775	0.370825	3.93109	8.46e-05	0.000611251
Gh_A03G1123	138.495	1.45681	0.22903	6.3608	2.01e-10	3.99e-09
Gh_D07G0841	788.655	1.45621	0.445105	3.27161	0.00106936	0.00556365
Gh_D11G0545	41.9749	1.45551	0.322371	4.51502	6.33e-06	5.94e-05
Gh_A12G0719	5.36323	1.45547	0.536665	2.71206	0.00668667	0.0261076
Gh_Sca012210G01	24.3362	1.45392	0.498884	2.91435	0.00356427	0.0154729
Gh_D11G0411	121.604	1.45368	0.41743	3.48245	0.000496852	0.0028864
Gh_A02G0680	54.9989	1.4534	0.332681	4.36874	1.25e-05	0.000110031
Gh_D10G0640	621.871	1.45253	0.201929	7.19328	6.33e-13	1.76e-11
Gh_A11G0405	87.3896	1.45249	0.514413	2.8236	0.00474882	0.0196439
Gh_D02G1552	188.141	1.45226	0.159936	9.08025	1.08e-19	5.79e-18
Gh_D02G1483	645.519	1.4506	0.208251	6.96566	3.27e-12	8.32e-11
Gh_D10G2628	482.747	1.44949	0.133111	10.8894	1.3e-27	1.15e-25
Gh_D05G2069	154.428	1.4488	0.231722	6.25235	4.04e-10	7.73e-09
Gh_A06G1326	133.807	1.44788	0.179807	8.05242	8.12e-16	3.1e-14
Gh_A05G3606	66.2381	1.44667	0.242383	5.96855	2.39e-09	4.1e-08
Gh_A07G0616	1516.25	1.44655	0.155019	9.33143	1.04e-20	6.02e-19
Gh_D04G1860	105.332	1.44654	0.279323	5.17873	2.23e-07	2.8e-06
Gh_D08G0734	430.631	1.44639	0.161006	8.98341	2.63e-19	1.36e-17
Gh_D04G0895	55.5463	1.44457	0.374997	3.85222	0.00011705	0.000816422
Gh_D02G0316	50.5567	1.44448	0.301135	4.79679	1.61e-06	1.73e-05
Gh_A05G1544	27.7772	1.4444	0.387368	3.72875	0.000192432	0.00126445
Gh_A05G0909	6.44726	1.44261	0.509963	2.82884	0.00467164	0.0193811
Gh_A12G0749	53.2166	1.44249	0.296806	4.86006	1.17e-06	1.29e-05
Gh_D07G1199	765.282	1.44203	0.144942	9.94898	2.55e-23	1.74e-21
Gh_A09G0316	186.459	1.44174	0.233812	6.16626	6.99e-10	1.29e-08
Gh_A07G0118	290.583	1.44026	0.210964	6.82704	8.67e-12	2.08e-10
Gh_A12G1623	100.468	1.43784	0.258652	5.55896	2.71e-08	3.98e-07
Gh_D04G0135	25.7976	1.43632	0.499289	2.87672	0.00401831	0.0171043
Gh_A02G0086	9.77159	1.43581	0.535781	2.67985	0.0073656	0.0283072
Gh_D06G0235	13.9298	1.43536	0.478243	3.00132	0.00268809	0.0121847
Gh_A05G0801	146.52	1.43525	0.298092	4.81481	1.47e-06	1.59e-05
Gh_D08G0043	3.43515	1.43508	0.516786	2.77694	0.00548734	0.022178
Gh_A13G1951	272.168	1.43501	0.162111	8.85206	8.59e-19	4.3e-17
Gh_A02G0788	1640.74	1.43459	0.387478	3.70238	0.000213584	0.00138486
Gh_A13G1059	303.587	1.43326	0.477291	3.00291	0.00267407	0.0121334
Gh_A10G2246	94.2255	1.43313	0.428465	3.34479	0.000823447	0.00446056
Gh_D10G1976	168.377	1.43243	0.318957	4.49098	7.09e-06	6.59e-05
Gh_A13G0693	387.091	1.43229	0.206562	6.93396	4.09e-12	1.03e-10
Gh_D01G1816	182.713	1.43218	0.253711	5.64492	1.65e-08	2.51e-07
Gh_D11G1336	5.99031	1.43186	0.511934	2.79695	0.00515867	0.0210502
Gh_A11G2869	313.226	1.43179	0.182034	7.86552	3.68e-15	1.31e-13
Gh_D07G1896	86.238	1.43172	0.235862	6.07018	1.28e-09	2.28e-08
Gh_D09G0489	1096.89	1.43107	0.382801	3.73842	0.000185183	0.00122136
Gh_A10G0706	51.564	1.43058	0.462008	3.09644	0.00195857	0.00932222
Gh_D06G1215	1553.47	1.43045	0.126127	11.3413	8.19e-30	8.26e-28
Gh_D13G2088	9.34421	1.43042	0.53659	2.66577	0.0076813	0.0292754
Gh_D11G1087	16.0142	1.43028	0.425587	3.36072	0.000777398	0.00424384
Gh_D05G1007	16.8288	1.4278	0.481301	2.96654	0.00301175	0.0134356
Gh_A06G0942	297.838	1.42776	0.147256	9.69576	3.14e-22	2e-20
Gh_D08G2619	245.141	1.42741	0.303984	4.69568	2.66e-06	2.71e-05
Gh_D05G0736	11.8263	1.42631	0.46746	3.05119	0.00227936	0.0106024
Gh_A07G0290	59.9615	1.4259	0.300445	4.74596	2.08e-06	2.17e-05
Gh_D05G0223	18.7829	1.42514	0.475684	2.99598	0.00273569	0.0123716
Gh_D06G0618	41.1516	1.42476	0.470025	3.03125	0.00243547	0.0112229
Gh_D07G1991	211.479	1.42405	0.435445	3.27033	0.00107423	0.00558346
Gh_A07G2052	9.82558	1.42397	0.525679	2.70882	0.00675223	0.0263319
Gh_D08G1792	68.2015	1.42301	0.264632	5.37729	7.56e-08	1.03e-06
Gh_D06G1580	45.2347	1.42299	0.333781	4.26325	2.01e-05	0.000170072
Gh_D02G1891	4010.14	1.42266	0.297652	4.77962	1.76e-06	1.86e-05
Gh_D10G2049	192.037	1.42257	0.21335	6.66778	2.6e-11	5.81e-10
Gh_A12G1270	1253.07	1.42247	0.23484	6.05717	1.39e-09	2.46e-08
Gh_A10G0931	91.5947	1.42094	0.312346	4.54925	5.38e-06	5.14e-05
Gh_D05G1815	217.584	1.42094	0.2657	5.34791	8.9e-08	1.2e-06
Gh_D09G1487	348.27	1.41974	0.175877	8.07233	6.9e-16	2.65e-14
Gh_A08G0604	66.4646	1.41932	0.286247	4.95839	7.11e-07	8.12e-06
Gh_D08G1138	643.945	1.41912	0.157125	9.03177	1.69e-19	8.9e-18
Gh_D06G1341	172.565	1.41889	0.306448	4.63014	3.65e-06	3.62e-05
Gh_A08G2414	3.43828	1.4175	0.535821	2.64546	0.00815791	0.030796
Gh_A02G0307	40.853	1.41714	0.394101	3.59587	0.000323307	0.00198544
Gh_A12G0548	102.44	1.41704	0.42249	3.35403	0.000796435	0.00433235
Gh_A13G2329	197.422	1.41613	0.362844	3.90285	9.51e-05	0.000678258
Gh_A02G1312	549.297	1.41605	0.334476	4.23363	2.3e-05	0.00019142
Gh_A09G0380	52.2927	1.4154	0.371059	3.81449	0.000136464	0.000934287
Gh_D10G1109	26.0869	1.41439	0.530796	2.66465	0.00770683	0.0293612
Gh_A04G0373	122.349	1.41276	0.205864	6.86259	6.76e-12	1.65e-10
Gh_D05G0755	866.413	1.41216	0.203529	6.93836	3.97e-12	9.98e-11
Gh_A06G0042	131.248	1.41215	0.328819	4.29463	1.75e-05	0.000149557
Gh_A11G0222	118.379	1.41189	0.310877	4.54165	5.58e-06	5.31e-05
Gh_A08G0574	1550.67	1.41135	0.140873	10.0186	1.26e-23	8.77e-22
Gh_D08G1481	54.2615	1.41131	0.386024	3.65602	0.000256157	0.00162335
Gh_D07G2103	36.7852	1.41109	0.328046	4.3015	1.7e-05	0.000145399
Gh_A11G0672	766.315	1.41066	0.146686	9.61689	6.79e-22	4.22e-20
Gh_D10G2458	53.7149	1.40848	0.335985	4.19211	2.76e-05	0.000224952
Gh_D09G0932	86.3048	1.40846	0.24454	5.75962	8.43e-09	1.34e-07
Gh_A08G0543	41.443	1.40736	0.301476	4.66823	3.04e-06	3.06e-05
Gh_A04G0881	781.608	1.40728	0.29576	4.75817	1.95e-06	2.05e-05
Gh_A11G0196	5.72224	1.4065	0.525094	2.67857	0.00739378	0.0284043
Gh_D02G0727	50.1873	1.4056	0.300086	4.68397	2.81e-06	2.86e-05
Gh_D13G1802	5.59169	1.40518	0.533124	2.63574	0.00839541	0.0315373
Gh_A12G1478	83.7195	1.40506	0.373223	3.76467	0.000166768	0.00111501
Gh_D07G0797	331.886	1.40434	0.238782	5.88128	4.07e-09	6.73e-08
Gh_D12G1110	41.1035	1.40418	0.36528	3.84412	0.000120987	0.000840665
Gh_D04G1572	174.581	1.40385	0.189985	7.38923	1.48e-13	4.47e-12
Gh_D05G3904	98.7373	1.40375	0.262453	5.34859	8.86e-08	1.19e-06
Gh_A12G1537	204.25	1.40362	0.199179	7.04704	1.83e-12	4.8e-11
Gh_A10G0965	30.5648	1.40343	0.384642	3.64867	0.000263604	0.00166511
Gh_A11G0877	370.77	1.40339	0.172672	8.12751	4.38e-16	1.73e-14
Gh_D11G1158	1046.64	1.40333	0.171058	8.20381	2.33e-16	9.43e-15
Gh_A11G0497	46.4464	1.40319	0.475397	2.95162	0.00316114	0.0139988
Gh_A08G2253	338.045	1.40219	0.248079	5.65219	1.58e-08	2.42e-07
Gh_D02G2396	38.4389	1.40192	0.332209	4.22001	2.44e-05	0.000201753
Gh_A07G0624	2655.7	1.40119	0.227103	6.16988	6.83e-10	1.27e-08
Gh_A05G3818	26.8693	1.3995	0.50205	2.78758	0.00531032	0.0215672
Gh_A11G0303	674.668	1.39895	0.164151	8.52237	1.56e-17	7.02e-16
Gh_A07G2336	496.765	1.39885	0.131521	10.6359	2.03e-26	1.71e-24
Gh_D06G0902	1187.56	1.39881	0.210327	6.65064	2.92e-11	6.48e-10
Gh_D01G1159	1091.15	1.39866	0.205928	6.79198	1.11e-11	2.61e-10
Gh_A12G0852	5.83465	1.3981	0.529975	2.63804	0.00833862	0.0313603
Gh_D13G0030	58.6768	1.39675	0.287269	4.86217	1.16e-06	1.27e-05
Gh_D13G1315	20.5762	1.3967	0.432452	3.22972	0.00123912	0.00631168
Gh_A11G3238	1489.6	1.39638	0.127001	10.9951	4.04e-28	3.69e-26
Gh_Sca010075G01	29.9394	1.39535	0.402883	3.46342	0.000533348	0.00306784
Gh_D04G1450	39.107	1.39522	0.320261	4.3565	1.32e-05	0.000115718
Gh_A06G0605	242.382	1.39487	0.191948	7.26692	3.68e-13	1.06e-11
Gh_A10G1074	13.2262	1.39458	0.499552	2.79167	0.00524376	0.02134
Gh_A03G2153	13.5377	1.39422	0.524524	2.65806	0.00785922	0.0298509
Gh_D07G0967	23.5435	1.39384	0.368747	3.77994	0.000156867	0.00105697
Gh_D05G3605	683.017	1.39365	0.186847	7.45876	8.73e-14	2.7e-12
Gh_D13G0189	422.725	1.39259	0.250157	5.56688	2.59e-08	3.81e-07
Gh_A05G3445	1593.94	1.39243	0.164585	8.46023	2.67e-17	1.18e-15
Gh_A08G1325	1237.72	1.39242	0.285452	4.87795	1.07e-06	1.19e-05
Gh_A07G0054	8.94798	1.39235	0.508134	2.74012	0.00614162	0.0243299
Gh_A06G0520	1903.77	1.39219	0.198144	7.02615	2.12e-12	5.53e-11
Gh_D05G3412	15.953	1.39131	0.52649	2.64261	0.00822703	0.0310117
Gh_A05G1255	8.59076	1.3908	0.527656	2.63581	0.00839368	0.0315349
Gh_D13G0564	937.45	1.39074	0.183056	7.59735	3.02e-14	9.78e-13
Gh_A12G2277	5.14709	1.39028	0.537418	2.58696	0.00968272	0.035436
Gh_D06G2283	5645.95	1.38991	0.212812	6.53117	6.53e-11	1.38e-09
Gh_A05G2793	349.236	1.38973	0.281282	4.94071	7.78e-07	8.82e-06
Gh_D12G1540	320.941	1.38929	0.17592	7.89728	2.85e-15	1.03e-13
Gh_A01G1977	47.6101	1.38926	0.339991	4.08617	4.39e-05	0.000340375
Gh_D01G1392	63.0415	1.38926	0.370295	3.75176	0.000175597	0.00116539
Gh_A07G1964	28.5988	1.38877	0.422696	3.2855	0.00101802	0.00533031
Gh_A05G2888	49.1093	1.38858	0.406778	3.4136	0.0006411	0.00359644
Gh_Sca017354G01	201.798	1.38829	0.389146	3.56755	0.000360341	0.00218275
Gh_D13G1029	442.164	1.38799	0.194749	7.12709	1.03e-12	2.77e-11
Gh_A11G0194	14.2657	1.38722	0.494923	2.80289	0.00506462	0.0207224
Gh_A06G1771	57.72	1.38703	0.378866	3.661	0.000251236	0.00159668
Gh_D11G3175	47.3142	1.38599	0.362258	3.82598	0.000130254	0.000897246
Gh_A06G1664	529.965	1.38588	0.199535	6.94552	3.77e-12	9.52e-11
Gh_D04G0168	129.989	1.38581	0.257947	5.37247	7.77e-08	1.06e-06
Gh_D05G2073	27.0517	1.38574	0.369631	3.74899	0.000177548	0.0011766
Gh_D11G0644	546.25	1.3857	0.181218	7.64657	2.06e-14	6.79e-13
Gh_Sca004838G01	490.321	1.38518	0.159814	8.66744	4.42e-18	2.08e-16
Gh_A08G1059	62.7445	1.38497	0.436496	3.17294	0.00150906	0.00746741
Gh_A11G1016	73.0774	1.38491	0.513582	2.69657	0.00700567	0.0271369
Gh_D02G0605	211.302	1.38472	0.22756	6.08507	1.16e-09	2.09e-08
Gh_D12G2105	1128.12	1.38461	0.202664	6.83206	8.37e-12	2.02e-10
Gh_A12G0907	67.3549	1.38461	0.274561	5.043	4.58e-07	5.41e-06
Gh_A12G0486	48.6739	1.38442	0.316935	4.36814	1.25e-05	0.000110319
Gh_A04G0372	236.394	1.38396	0.215327	6.42726	1.3e-10	2.66e-09
Gh_D09G0687	3.5406	1.38373	0.536556	2.57891	0.00991128	0.0361485
Gh_A09G0309	6.59161	1.38364	0.529091	2.61513	0.00891931	0.0331381
Gh_D05G0890	18.8036	1.38301	0.417007	3.31652	0.000911457	0.00485031
Gh_A13G1763	1060.92	1.3828	0.330346	4.18592	2.84e-05	0.000230629
Gh_D12G2267	1627.66	1.38187	0.153053	9.02876	1.74e-19	9.14e-18
Gh_D01G0261	8.04032	1.38099	0.489772	2.81966	0.00480743	0.0198469
Gh_D07G2007	645.729	1.38056	0.251674	5.48551	4.12e-08	5.84e-07
Gh_D01G0593	8.58281	1.38037	0.526536	2.6216	0.00875174	0.0326298
Gh_A12G0179	2125.9	1.37963	0.150253	9.18203	4.23e-20	2.34e-18
Gh_D10G0374	11.2382	1.37957	0.476439	2.89558	0.00378456	0.0162574
Gh_D02G1319	9036.63	1.37944	0.123704	11.1512	7.07e-29	6.8e-27
Gh_A06G0529	35.171	1.37908	0.459065	3.0041	0.00266367	0.0120975
Gh_Sca041520G01	35.171	1.37908	0.459065	3.0041	0.00266367	0.0120975
Gh_D12G0989	969.827	1.37791	0.188137	7.32398	2.41e-13	7.13e-12
Gh_A05G3814	617.062	1.37788	0.197136	6.98949	2.76e-12	7.09e-11
Gh_D12G2812	8.61702	1.37674	0.51366	2.68025	0.00735665	0.0282776
Gh_A12G1402	31.8046	1.37628	0.306971	4.48344	7.34e-06	6.81e-05
Gh_D13G1303	30.6818	1.37591	0.474524	2.89955	0.00373697	0.0160932
Gh_D13G2397	32.9866	1.3757	0.399087	3.44712	0.000566597	0.00323135
Gh_A09G1779	330.779	1.37448	0.247035	5.56388	2.64e-08	3.87e-07
Gh_D03G0749	7.7211	1.37431	0.499275	2.7526	0.00591235	0.0235722
Gh_D10G1619	22.1602	1.3738	0.427594	3.21285	0.00131424	0.00663861
Gh_D05G2384	6672.78	1.3726	0.130832	10.4913	9.47e-26	7.63e-24
Gh_A13G2138	317.794	1.37256	0.17278	7.94396	1.96e-15	7.2e-14
Gh_A07G1213	12.2162	1.37253	0.462747	2.96605	0.00301656	0.0134539
Gh_A09G1303	125.653	1.37184	0.228419	6.00578	1.9e-09	3.31e-08
Gh_D02G1079	17.5599	1.37156	0.502952	2.72701	0.00639104	0.0251445
Gh_D13G0812	60.4689	1.37153	0.29623	4.62997	3.66e-06	3.62e-05
Gh_D10G1061	75.5452	1.37142	0.275283	4.98187	6.3e-07	7.26e-06
Gh_D02G1380	35.4986	1.37133	0.372397	3.68245	0.000230999	0.00148294
Gh_D13G0291	56.0259	1.37094	0.383149	3.57807	0.000346137	0.0021081
Gh_D13G2302	60.0398	1.3705	0.281563	4.86748	1.13e-06	1.24e-05
Gh_A06G1803	31.5825	1.37041	0.520162	2.63458	0.00842416	0.0316351
Gh_A05G0037	145.18	1.3702	0.411414	3.33046	0.000867024	0.00465482
Gh_A12G2341	52.1523	1.37015	0.496648	2.75879	0.00580157	0.0232067
Gh_D01G0689	5290.84	1.37008	0.120452	11.3745	5.6e-30	5.74e-28
Gh_A04G0085	29.8828	1.36965	0.350961	3.90257	9.52e-05	0.000678895
Gh_D12G0538	31.1365	1.36928	0.35058	3.90577	9.39e-05	0.00067136
Gh_D09G2285	473.94	1.36923	0.391797	3.49475	0.000474513	0.00277682
Gh_D05G3098	226.359	1.36897	0.380262	3.60008	0.000318125	0.00195692
Gh_D04G0716	430.152	1.36804	0.180466	7.58062	3.44e-14	1.11e-12
Gh_A09G2140	299.784	1.368	0.178488	7.66436	1.8e-14	5.96e-13
Gh_A11G0868	316.844	1.36625	0.238691	5.72392	1.04e-08	1.63e-07
Gh_D13G2007	141.136	1.36546	0.323794	4.21706	2.48e-05	0.000204
Gh_D04G0667	40.0125	1.36473	0.473182	2.88416	0.00392458	0.0167625
Gh_A11G0364	706.939	1.36352	0.263778	5.16922	2.35e-07	2.94e-06
Gh_A10G1183	2913.15	1.36291	0.142478	9.5657	1.11e-21	6.8e-20
Gh_D13G0235	299.419	1.36272	0.221851	6.14249	8.12e-10	1.49e-08
Gh_A05G0692	72.2403	1.36248	0.37364	3.64651	0.000265828	0.00167644
Gh_D07G0683	1307.25	1.36222	0.17357	7.84821	4.22e-15	1.5e-13
Gh_A02G0719	14.5553	1.36183	0.43995	3.09543	0.00196531	0.00934909
Gh_D02G1971	20.6636	1.36154	0.445246	3.05796	0.0022285	0.0104065
Gh_A13G0448	10.9176	1.36143	0.532911	2.55471	0.0106276	0.0382752
Gh_A01G1618	13.0787	1.36118	0.435208	3.12766	0.00176204	0.00852039
Gh_A03G1668	6.65864	1.36109	0.523659	2.59918	0.00934462	0.0344155
Gh_A05G0318	1083.64	1.3604	0.133953	10.1558	3.12e-24	2.27e-22
Gh_Sca114658G01	10.2435	1.36034	0.497835	2.73252	0.0062852	0.0247953
Gh_Sca137614G01	12.7466	1.35897	0.491724	2.76369	0.00571511	0.0229206
Gh_A02G1163	122.515	1.35876	0.247193	5.49674	3.87e-08	5.51e-07
Gh_D01G0468	39.5135	1.35796	0.421657	3.22052	0.00127956	0.00649045
Gh_A05G2284	40.048	1.35786	0.353961	3.8362	0.000124952	0.00086502
Gh_A11G0083	15.9358	1.35703	0.455273	2.98069	0.00287603	0.012915
Gh_A09G1896	4.02574	1.35672	0.535116	2.53538	0.0112324	0.0400598
Gh_D05G2997	142.987	1.35661	0.192996	7.02919	2.08e-12	5.43e-11
Gh_A10G0400	16.4116	1.35639	0.492718	2.75287	0.00590761	0.0235595
Gh_A04G1343	52.7577	1.35596	0.273747	4.95334	7.3e-07	8.32e-06
Gh_A12G2036	245.913	1.35472	0.152944	8.8576	8.18e-19	4.09e-17
Gh_D09G1791	276.851	1.35421	0.16872	8.02634	1e-15	3.8e-14
Gh_A08G1578	209.389	1.3542	0.293002	4.62182	3.8e-06	3.75e-05
Gh_A05G0802	62.5182	1.35378	0.432111	3.13295	0.00173058	0.0083926
Gh_D03G1204	619.179	1.35347	0.19719	6.8638	6.71e-12	1.64e-10
Gh_D13G1392	964.064	1.35334	0.156596	8.64224	5.51e-18	2.58e-16
Gh_A04G1106	230.413	1.35288	0.316085	4.28012	1.87e-05	0.000158811
Gh_A12G2129	91.7743	1.35252	0.287185	4.70957	2.48e-06	2.55e-05
Gh_A08G1574	56.0897	1.3518	0.322331	4.19381	2.74e-05	0.000223564
Gh_D11G2334	266.064	1.35176	0.212928	6.34842	2.18e-10	4.31e-09
Gh_A10G0569	518.512	1.35132	0.134649	10.0359	1.06e-23	7.38e-22
Gh_A05G3783	179.381	1.35126	0.156224	8.64954	5.17e-18	2.42e-16
Gh_D08G2197	215.995	1.35073	0.210298	6.42294	1.34e-10	2.73e-09
Gh_D06G1570	45.5108	1.3506	0.429682	3.14326	0.0016708	0.00814129
Gh_D10G1638	89.5899	1.35001	0.328691	4.10725	4e-05	0.000313704
Gh_D04G1682	114.114	1.34975	0.196394	6.87267	6.3e-12	1.54e-10
Gh_A06G1864	35.5928	1.34919	0.329739	4.09168	4.28e-05	0.000333333
Gh_D05G1128	45.4886	1.34838	0.358852	3.75747	0.000171642	0.00114344
Gh_D11G2343	72.8972	1.34812	0.456376	2.95397	0.00313715	0.0139077
Gh_D09G0721	24.836	1.34779	0.335987	4.01145	6.03e-05	0.000452256
Gh_A07G0955	99.291	1.34647	0.420915	3.19891	0.00137947	0.00691538
Gh_A02G1668	517.033	1.34615	0.18556	7.25452	4.03e-13	1.15e-11
Gh_D07G2239	6.65086	1.34611	0.53435	2.51916	0.0117636	0.0416029
Gh_D13G0302	2096.87	1.34547	0.115276	11.6717	1.78e-31	1.97e-29
Gh_D12G2678	2.5771	1.34545	0.515623	2.60937	0.00907097	0.0335795
Gh_A05G0974	249.784	1.34466	0.194354	6.9186	4.56e-12	1.14e-10
Gh_A12G1335	2672.98	1.34372	0.186424	7.20788	5.68e-13	1.59e-11
Gh_A10G0473	114.496	1.34341	0.496638	2.705	0.00683035	0.0265834
Gh_A11G0257	413.258	1.34312	0.201247	6.67399	2.49e-11	5.58e-10
Gh_D11G3226	157.788	1.34304	0.226443	5.93102	3.01e-09	5.06e-08
Gh_A05G0461	232.036	1.34284	0.243463	5.51557	3.48e-08	4.99e-07
Gh_A12G1756	576.63	1.34276	0.143507	9.35675	8.22e-21	4.76e-19
Gh_D06G1928	57.4225	1.34247	0.287636	4.66726	3.05e-06	3.08e-05
Gh_D03G1219	244.056	1.34243	0.173497	7.7375	1.01e-14	3.45e-13
Gh_A09G0302	4.39612	1.34237	0.528577	2.5396	0.0110979	0.0396651
Gh_A09G1938	22.7847	1.34179	0.384504	3.48967	0.000483619	0.00282094
Gh_D04G1166	114.386	1.34175	0.22856	5.87046	4.35e-09	7.17e-08
Gh_A12G0622	124.919	1.34175	0.265483	5.05398	4.33e-07	5.13e-06
Gh_D11G0464	159.946	1.34152	0.185349	7.2378	4.56e-13	1.29e-11
Gh_A04G1001	72.823	1.34107	0.271009	4.94842	7.48e-07	8.52e-06
Gh_A09G0376	23.0733	1.34095	0.369933	3.62483	0.000289148	0.0018041
Gh_D05G0227	543.715	1.34067	0.202005	6.63681	3.21e-11	7.07e-10
Gh_A01G0535	23.6746	1.34055	0.51028	2.62708	0.00861216	0.0322104
Gh_D03G1775	134.228	1.3402	0.233538	5.73868	9.54e-09	1.5e-07
Gh_D06G0396	654.231	1.34017	0.143941	9.31059	1.27e-20	7.27e-19
Gh_A09G1053	58.6181	1.34004	0.3895	3.44042	0.000580813	0.00330081
Gh_D12G1478	1878.49	1.33944	0.167108	8.01543	1.1e-15	4.13e-14
Gh_D10G1316	4562.3	1.33896	0.156735	8.54283	1.31e-17	5.94e-16
Gh_D11G1562	1367.74	1.33865	0.165739	8.07691	6.64e-16	2.56e-14
Gh_A03G1365	194.595	1.33817	0.26148	5.11767	3.09e-07	3.78e-06
Gh_A10G0048	59.175	1.33778	0.454199	2.94536	0.0032258	0.0142336
Gh_D06G0644	23.2783	1.33762	0.419526	3.1884	0.00143063	0.00713991
Gh_D10G2422	3995.39	1.33646	0.135349	9.87417	5.39e-23	3.59e-21
Gh_D11G2183	29.8624	1.3361	0.525374	2.54315	0.0109857	0.0393364
Gh_A02G0117	30.4219	1.33601	0.411115	3.24974	0.00115512	0.00594586
Gh_D05G3410	10.845	1.33475	0.53755	2.48303	0.0130272	0.0451755
Gh_D06G1241	54.9862	1.33434	0.275926	4.83587	1.33e-06	1.44e-05
Gh_A12G1243	270.59	1.33366	0.17287	7.71481	1.21e-14	4.08e-13
Gh_Sca138621G01	5.02599	1.3331	0.530089	2.51487	0.0119078	0.0420199
Gh_A08G2180	1955.61	1.33301	0.216366	6.16093	7.23e-10	1.34e-08
Gh_A07G1559	239.709	1.33238	0.458226	2.90769	0.00364105	0.0157558
Gh_D06G1335	178.46	1.33233	0.326372	4.08225	4.46e-05	0.00034545
Gh_D11G0125	10.7925	1.33196	0.517449	2.57408	0.0100507	0.0365458
Gh_A09G2143	12.6906	1.33103	0.468386	2.84174	0.00448686	0.0187519
Gh_A02G0258	158.822	1.33096	0.305834	4.3519	1.35e-05	0.000117958
Gh_A02G1019	121.125	1.33089	0.194169	6.85431	7.17e-12	1.74e-10
Gh_A09G1919	16.8041	1.33083	0.404285	3.29182	0.000995408	0.0052274
Gh_D06G2130	35.8431	1.33082	0.327426	4.06448	4.81e-05	0.00036951
Gh_D05G1482	21.4037	1.33046	0.503378	2.64306	0.00821599	0.0309811
Gh_A09G0062	2063.73	1.33027	0.0755768	17.6015	2.4e-69	1.25e-66
Gh_A05G0255	62.0466	1.32999	0.271979	4.89005	1.01e-06	1.12e-05
Gh_D12G2715	239.395	1.32964	0.376572	3.53092	0.00041412	0.00246964
Gh_D10G0322	117.867	1.32927	0.394129	3.37268	0.000744407	0.0040894
Gh_D05G1912	325.237	1.32884	0.261043	5.09053	3.57e-07	4.3e-06
Gh_D05G1769	51.1007	1.32875	0.449741	2.95448	0.003132	0.0138881
Gh_D10G1317	31.42	1.32825	0.376292	3.52983	0.000415828	0.00247792
Gh_A05G3321	580.902	1.32819	0.240633	5.51958	3.4e-08	4.89e-07
Gh_D11G0852	1477.09	1.32815	0.163689	8.11387	4.9e-16	1.93e-14
Gh_D05G0027	42.3142	1.32812	0.371559	3.57445	0.000350961	0.00213369
Gh_A10G1291	70.2485	1.32681	0.304369	4.35921	1.31e-05	0.00011443
Gh_D05G0141	2.82599	1.32628	0.534413	2.48174	0.0130741	0.0452946
Gh_D06G1576	18.5057	1.32585	0.389362	3.4052	0.000661164	0.00369159
Gh_D12G1334	198.228	1.32577	0.205537	6.45026	1.12e-10	2.3e-09
Gh_D08G2115	28.6008	1.3252	0.412656	3.21139	0.00132097	0.00666624
Gh_D05G3872	47.4277	1.32506	0.387242	3.42179	0.000622093	0.0035033
Gh_A06G1139	3199.07	1.32424	0.232025	5.70734	1.15e-08	1.79e-07
Gh_D12G1769	103.042	1.32379	0.240359	5.50753	3.64e-08	5.2e-07
Gh_D06G0411	1986.69	1.32365	0.213652	6.19534	5.82e-10	1.09e-08
Gh_A01G1221	172.694	1.32315	0.325964	4.05919	4.92e-05	0.000377038
Gh_D07G1945	4529.98	1.32302	0.285523	4.63368	3.59e-06	3.56e-05
Gh_D05G1546	1487.21	1.32282	0.214918	6.15502	7.51e-10	1.39e-08
Gh_D11G0087	7.72306	1.322	0.527376	2.50675	0.0121847	0.0427832
Gh_D11G0660	30.842	1.3215	0.376235	3.51243	0.000444034	0.00262428
Gh_A07G1541	197.946	1.32147	0.522299	2.53011	0.0114026	0.0405772
Gh_A07G1289	38.6387	1.32098	0.32746	4.03402	5.48e-05	0.00041464
Gh_A05G3908	483.884	1.32074	0.161912	8.15715	3.43e-16	1.37e-14
Gh_A07G1351	587.921	1.32071	0.211343	6.24913	4.13e-10	7.88e-09
Gh_A01G0828	131.804	1.32024	0.318479	4.14546	3.39e-05	0.000270054
Gh_D01G1318	16.4271	1.31977	0.451692	2.92183	0.00347983	0.0151663
Gh_D05G2087	50.1358	1.31972	0.314693	4.19369	2.74e-05	0.000223621
Gh_A12G1981	74.0991	1.31956	0.367103	3.59452	0.000324988	0.00199368
Gh_D06G1853	54.3544	1.31831	0.353497	3.72934	0.000191981	0.00126177
Gh_A01G2093	119.813	1.31809	0.226752	5.81294	6.14e-09	9.92e-08
Gh_D07G1120	312.855	1.31786	0.265634	4.96118	7.01e-07	8.01e-06
Gh_Sca072123G01	7.89033	1.31785	0.51079	2.58002	0.0098796	0.0360487
Gh_D11G1367	612.17	1.31741	0.270428	4.87159	1.11e-06	1.22e-05
Gh_A13G0828	102.961	1.31726	0.217302	6.06186	1.35e-09	2.4e-08
Gh_D05G1248	90.4224	1.3171	0.229955	5.72761	1.02e-08	1.6e-07
Gh_D08G0635	414.097	1.31692	0.183683	7.16949	7.53e-13	2.07e-11
Gh_D10G1604	30.2145	1.31655	0.412851	3.18892	0.00142807	0.00712896
Gh_D10G0208	12.0366	1.31596	0.496685	2.64948	0.00806162	0.0304917
Gh_D12G2004	43.0925	1.31541	0.314626	4.18088	2.9e-05	0.000235194
Gh_D05G0815	1267.38	1.31493	0.192573	6.82821	8.6e-12	2.07e-10
Gh_A13G1212	1129.6	1.31433	0.289704	4.53679	5.71e-06	5.42e-05
Gh_A06G0043	28.6406	1.31387	0.389416	3.37396	0.00074095	0.00407271
Gh_Sca007080G02	387.61	1.31372	0.192449	6.8263	8.71e-12	2.09e-10
Gh_Sca011408G01	1216.89	1.31305	0.145978	8.99486	2.37e-19	1.23e-17
Gh_D05G3030	748.921	1.31298	0.362284	3.62418	0.000289881	0.0018072
Gh_Sca160081G01	3.31055	1.3129	0.534372	2.45691	0.0140139	0.0479076
Gh_D06G2233	692.67	1.3129	0.168029	7.81349	5.56e-15	1.95e-13
Gh_D03G0232	110.786	1.31145	0.481904	2.72139	0.00650072	0.0255029
Gh_A01G0876	202.104	1.31113	0.242762	5.40091	6.63e-08	9.13e-07
Gh_D04G0674	1030.67	1.31016	0.159044	8.23774	1.75e-16	7.2e-15
Gh_D12G1745	32.7259	1.31007	0.38625	3.39176	0.000694451	0.00385089
Gh_D01G0912	101.213	1.30838	0.248267	5.27007	1.36e-07	1.78e-06
Gh_A03G0850	28.2136	1.30732	0.385999	3.38685	0.000706988	0.00391185
Gh_D10G2488	133.662	1.30718	0.377839	3.45962	0.000540933	0.00310626
Gh_A05G2369	1007.96	1.30686	0.119198	10.9638	5.7e-28	5.16e-26
Gh_A03G1304	90.6613	1.30637	0.236448	5.52499	3.29e-08	4.74e-07
Gh_A08G0705	15.7193	1.3063	0.45744	2.85567	0.00429463	0.0180726
Gh_D12G2631	37.047	1.30604	0.333499	3.91617	9e-05	0.000646242
Gh_A05G2784	337.019	1.30598	0.176882	7.38333	1.54e-13	4.67e-12
Gh_D01G2237	179.835	1.30597	0.227877	5.73103	9.98e-09	1.57e-07
Gh_D12G1915	91.6507	1.30544	0.426432	3.0613	0.00220377	0.0103075
Gh_A02G0321	10.8349	1.30537	0.506093	2.5793	0.0099	0.0361119
Gh_D12G1670	200.21	1.30525	0.1894	6.8915	5.52e-12	1.36e-10
Gh_D06G0554	41.1339	1.30513	0.445568	2.92913	0.0033991	0.01488
Gh_A01G1463	1028.89	1.30462	0.191692	6.8058	1e-11	2.39e-10
Gh_D07G2187	239.106	1.30433	0.215347	6.05685	1.39e-09	2.47e-08
Gh_D08G1873	68.9206	1.30372	0.24467	5.3285	9.9e-08	1.32e-06
Gh_A07G2011	70.9246	1.30264	0.351043	3.71077	0.000206629	0.0013447
Gh_D12G2309	1417.99	1.30263	0.155327	8.38638	5.01e-17	2.15e-15
Gh_D12G1812	99.5181	1.30225	0.244952	5.31635	1.06e-07	1.41e-06
Gh_A07G0053	6.38037	1.30198	0.533517	2.44036	0.0146724	0.0496759
Gh_D02G0546	5.44932	1.30148	0.524853	2.47971	0.0131489	0.0454948
Gh_A11G2457	403.001	1.30125	0.182089	7.14625	8.92e-13	2.43e-11
Gh_A05G2128	5712.8	1.30107	0.126307	10.3009	6.98e-25	5.26e-23
Gh_D08G1061	462.786	1.301	0.172639	7.53597	4.85e-14	1.54e-12
Gh_D02G0993	85.4211	1.30016	0.426945	3.04527	0.00232474	0.0107885
Gh_A13G0294	13521.2	1.29955	0.166349	7.81218	5.62e-15	1.97e-13
Gh_A05G3050	82.595	1.29906	0.263027	4.9389	7.86e-07	8.9e-06
Gh_D11G0181	5082.54	1.29902	0.14784	8.78667	1.54e-18	7.59e-17
Gh_D05G0260	61.3544	1.29848	0.488503	2.65808	0.00785874	0.0298509
Gh_A09G0894	1271.57	1.29831	0.395303	3.28434	0.00102221	0.00534938
Gh_A07G1067	859.199	1.29784	0.168522	7.70134	1.35e-14	4.53e-13
Gh_A02G1136	67.7493	1.29772	0.425523	3.04971	0.00229064	0.0106481
Gh_D08G1664	35.7511	1.29705	0.321096	4.03945	5.36e-05	0.000406107
Gh_A03G0305	21.1422	1.29699	0.482903	2.68581	0.00723535	0.0278857
Gh_A13G2149	16.6806	1.29696	0.413368	3.13755	0.00170364	0.00827971
Gh_D06G2252	24.8146	1.29683	0.371417	3.49157	0.000480194	0.00280528
Gh_D02G0792	869.065	1.29636	0.224348	5.77834	7.54e-09	1.21e-07
Gh_D04G0087	18.1869	1.29624	0.519412	2.49558	0.012575	0.0439079
Gh_A06G1081	339.672	1.29612	0.173068	7.48905	6.94e-14	2.17e-12
Gh_D12G2832	111.862	1.29579	0.266806	4.85667	1.19e-06	1.31e-05
Gh_A05G1454	324.218	1.29568	0.130913	9.89725	4.28e-23	2.88e-21
Gh_A12G0640	34.8731	1.29515	0.39695	3.26277	0.00110331	0.00571525
Gh_A10G2198	100.699	1.29483	0.264047	4.90381	9.4e-07	1.05e-05
Gh_A11G0632	30.2846	1.29482	0.362226	3.57461	0.000350745	0.0021326
Gh_A05G2459	39.0121	1.2938	0.413018	3.13255	0.00173293	0.00840031
Gh_A07G0379	34.8745	1.29313	0.464257	2.78538	0.00534652	0.0216946
Gh_D12G2560	417.871	1.29259	0.133619	9.67372	3.9e-22	2.47e-20
Gh_D01G2236	197.239	1.29197	0.378697	3.41161	0.000645808	0.00361867
Gh_D12G1827	473.847	1.29161	0.120952	10.6787	1.28e-26	1.09e-24
Gh_A12G1026	22.9894	1.29118	0.391862	3.29497	0.000984305	0.00517608
Gh_D10G0952	525.994	1.29106	0.199897	6.45861	1.06e-10	2.19e-09
Gh_A10G0593	338.089	1.29104	0.236794	5.45217	4.98e-08	6.96e-07
Gh_D06G2208	228.397	1.29099	0.322943	3.9976	6.4e-05	0.00047672
Gh_A07G0392	424.116	1.29067	0.16535	7.80568	5.92e-15	2.07e-13
Gh_A04G0003	111.733	1.29028	0.239635	5.38438	7.27e-08	9.94e-07
Gh_D11G1577	257.243	1.29026	0.200478	6.43593	1.23e-10	2.52e-09
Gh_D07G2097	84.5422	1.29014	0.238747	5.40381	6.52e-08	8.98e-07
Gh_D12G1388	13.0132	1.28912	0.506254	2.5464	0.0108841	0.0390515
Gh_D05G0917	592.43	1.28879	0.183882	7.00878	2.4e-12	6.22e-11
Gh_D02G0475	12.7023	1.28855	0.47397	2.71864	0.00655519	0.0256802
Gh_D11G1035	29.7606	1.28832	0.388367	3.31726	0.000909037	0.00483964
Gh_D13G2381	222.597	1.2883	0.325363	3.95957	7.51e-05	0.000550253
Gh_D11G1586	400.868	1.28783	0.213502	6.03191	1.62e-09	2.84e-08
Gh_D01G0303	424.341	1.2876	0.156706	8.21668	2.09e-16	8.52e-15
Gh_D03G1708	646.619	1.28736	0.190581	6.75492	1.43e-11	3.32e-10
Gh_A12G1909	1651.84	1.28656	0.166658	7.71972	1.17e-14	3.94e-13
Gh_A03G0596	55.3374	1.28609	0.301923	4.25967	2.05e-05	0.0001725
Gh_D06G1307	93.11	1.28549	0.325717	3.94665	7.93e-05	0.000577744
Gh_D10G0666	117.601	1.28546	0.243946	5.26945	1.37e-07	1.79e-06
Gh_A08G0505	210.737	1.28463	0.184638	6.95753	3.46e-12	8.78e-11
Gh_A05G2483	79.083	1.28432	0.376042	3.41536	0.000636985	0.00357714
Gh_D04G1273	40.5883	1.28417	0.435163	2.951	0.00316744	0.0140217
Gh_A11G3269	323.405	1.28415	0.144409	8.89248	5.98e-19	3.02e-17
Gh_D07G1161	852.988	1.28386	0.214101	5.99654	2.02e-09	3.49e-08
Gh_D10G1521	163.623	1.28375	0.444786	2.88623	0.00389892	0.01667
Gh_D08G2462	443.369	1.28362	0.172259	7.45168	9.22e-14	2.84e-12
Gh_D12G0866	32.4942	1.28354	0.346282	3.70664	0.000210026	0.00136391
Gh_D11G1989	9.68954	1.28157	0.474185	2.70268	0.0068783	0.0267269
Gh_A05G0798	505.085	1.28049	0.199991	6.40275	1.53e-10	3.09e-09
Gh_D06G1788	66.509	1.28039	0.400252	3.19896	0.00137923	0.00691478
Gh_D05G2688	35.4068	1.28035	0.445039	2.87694	0.00401552	0.0170965
Gh_D07G2365	277.959	1.28015	0.220089	5.8165	6.01e-09	9.73e-08
Gh_D13G2505	914.052	1.27989	0.11666	10.9711	5.26e-28	4.77e-26
Gh_D10G0147	13.5579	1.27986	0.491268	2.60521	0.00918175	0.0339207
Gh_D13G0901	23.9239	1.27955	0.370856	3.45026	0.000560042	0.00319992
Gh_Sca051070G01	13.3916	1.27897	0.467934	2.73324	0.00627152	0.0247519
Gh_A05G2738	455.483	1.27826	0.1681	7.6042	2.87e-14	9.28e-13
Gh_A04G0272	213.838	1.27816	0.159518	8.01264	1.12e-15	4.22e-14
Gh_D08G0044	18.798	1.27782	0.523274	2.44197	0.0146073	0.0495008
Gh_A05G3382	60.2728	1.27767	0.238767	5.35112	8.74e-08	1.18e-06
Gh_D07G2118	321.827	1.27726	0.17703	7.21493	5.4e-13	1.51e-11
Gh_A10G1605	46.989	1.27715	0.461007	2.77035	0.00559966	0.0225538
Gh_A07G1685	35.6876	1.2768	0.340922	3.74515	0.000180285	0.00119297
Gh_A11G2469	1445.34	1.27673	0.184675	6.91338	4.73e-12	1.18e-10
Gh_A02G1457	5259.54	1.27672	0.175579	7.27149	3.56e-13	1.03e-11
Gh_A07G2131	8.99367	1.27666	0.517279	2.46803	0.0135861	0.0467189
Gh_A08G0839	9.25076	1.27642	0.489046	2.61002	0.00905367	0.0335283
Gh_A09G1770	2.07807	1.27572	0.490955	2.59845	0.00936462	0.0344848
Gh_A13G1384	45.4674	1.27558	0.416503	3.0626	0.0021942	0.0102689
Gh_A07G1489	167.965	1.27546	0.40823	3.12437	0.00178187	0.00860414
Gh_A13G0189	44.087	1.27461	0.334895	3.80601	0.000141228	0.000963398
Gh_D08G1058	128.076	1.27446	0.231292	5.51019	3.58e-08	5.13e-07
Gh_D09G0141	1031.56	1.27446	0.519821	2.45172	0.0142173	0.0484553
Gh_D11G0141	1504.95	1.27437	0.161504	7.89064	3.01e-15	1.08e-13
Gh_A09G1434	1482.34	1.27427	0.119887	10.629	2.19e-26	1.83e-24
Gh_Sca005023G02	12.3008	1.27345	0.46608	2.73226	0.00629019	0.0248105
Gh_D07G1029	416.679	1.27326	0.181202	7.02673	2.11e-12	5.51e-11
Gh_A07G2212	846.696	1.2727	0.133893	9.50537	1.99e-21	1.2e-19
Gh_D11G1028	14.2542	1.27251	0.494843	2.57153	0.0101249	0.0367736
Gh_D10G2348	71.4457	1.27243	0.347668	3.65991	0.000252303	0.00160293
Gh_A08G1966	202.584	1.27214	0.398049	3.19593	0.00139383	0.00698039
Gh_D05G1916	192.125	1.27172	0.336581	3.77836	0.000157865	0.00106308
Gh_D07G0348	322.148	1.27124	0.237623	5.34981	8.8e-08	1.19e-06
Gh_A09G1208	426.18	1.27064	0.200055	6.35146	2.13e-10	4.23e-09
Gh_D05G3406	16.8343	1.27062	0.450277	2.82186	0.00477463	0.0197297
Gh_A02G1102	52.7516	1.27007	0.296124	4.289	1.79e-05	0.000153196
Gh_D11G2634	118.182	1.26995	0.202458	6.27262	3.55e-10	6.83e-09
Gh_A04G0523	22.8224	1.26943	0.457233	2.77632	0.0054978	0.0222095
Gh_Sca053067G01	36.4107	1.26906	0.324992	3.90492	9.43e-05	0.000673321
Gh_A11G2930	409.463	1.26881	0.183016	6.9328	4.13e-12	1.03e-10
Gh_A02G0870	131.091	1.26865	0.367451	3.45256	0.000555284	0.00317803
Gh_D11G3019	56.4778	1.26828	0.300933	4.21449	2.5e-05	0.000205926
Gh_A02G1533	495.281	1.26803	0.156451	8.10495	5.28e-16	2.06e-14
Gh_D10G1472	157.71	1.26705	0.18388	6.89065	5.55e-12	1.37e-10
Gh_A04G0509	221.253	1.267	0.181742	6.97145	3.14e-12	8e-11
Gh_A13G0283	1523.87	1.26693	0.125093	10.1279	4.15e-24	2.96e-22
Gh_A09G0649	169.417	1.26626	0.444802	2.84679	0.00441627	0.0185106
Gh_D10G0641	2480.99	1.26602	0.131737	9.61027	7.24e-22	4.48e-20
Gh_A08G0005	31.591	1.26583	0.42308	2.99195	0.002772	0.0125145
Gh_D06G2148	458.964	1.26579	0.178831	7.0781	1.46e-12	3.88e-11
Gh_A13G2270	4.21767	1.26548	0.515404	2.45531	0.0140764	0.0480678
Gh_D11G0788	955.464	1.26545	0.11459	11.0433	2.36e-28	2.19e-26
Gh_A05G0629	261.876	1.26532	0.177188	7.14113	9.26e-13	2.52e-11
Gh_D06G1311	369.841	1.26532	0.187414	6.75147	1.46e-11	3.39e-10
Gh_D01G1753	343.196	1.26515	0.340055	3.72044	0.00019888	0.00130066
Gh_D07G0102	86.8189	1.26513	0.294519	4.29558	1.74e-05	0.000148961
Gh_A11G1529	295.858	1.26507	0.359351	3.52044	0.000430832	0.00255558
Gh_D12G1030	211.766	1.26496	0.20749	6.09649	1.08e-09	1.96e-08
Gh_D10G0708	147.903	1.26458	0.280335	4.51097	6.45e-06	6.05e-05
Gh_A10G0375	84.9603	1.26458	0.287115	4.40443	1.06e-05	9.48e-05
Gh_A10G2164	43.1811	1.2644	0.326853	3.86842	0.000109545	0.000768394
Gh_D01G0070	9.15089	1.26293	0.436299	2.89464	0.00379591	0.0162929
Gh_D13G1354	365.537	1.26258	0.194798	6.48146	9.08e-11	1.89e-09
Gh_D08G1881	76.0684	1.26184	0.268092	4.70674	2.52e-06	2.58e-05
Gh_Sca024064G01	165.639	1.26151	0.476677	2.64647	0.00813376	0.0307143
Gh_A04G0011	9.16911	1.26109	0.508233	2.48132	0.0130897	0.0453302
Gh_A03G0434	111.01	1.26087	0.298235	4.22776	2.36e-05	0.000195897
Gh_D05G2447	319.513	1.26065	0.154762	8.14571	3.77e-16	1.5e-14
Gh_D11G0794	56.0705	1.26061	0.328502	3.83744	0.000124324	0.000861821
Gh_A06G0111	2.22606	1.26053	0.486173	2.59276	0.00952085	0.0349606
Gh_D13G2127	337.477	1.26027	0.329625	3.82333	0.000131662	0.00090577
Gh_D13G1033	891.209	1.25976	0.126645	9.94721	2.59e-23	1.77e-21
Gh_A08G2533	808.675	1.2595	0.366574	3.43588	0.000590643	0.00335014
Gh_A02G0951	8441.56	1.25946	0.154384	8.15797	3.41e-16	1.36e-14
Gh_A01G1410	49.5908	1.25916	0.330492	3.80996	0.000138987	0.000949219
Gh_A10G0617	13.5079	1.25907	0.43239	2.91189	0.00359244	0.0155767
Gh_D13G1305	97.1312	1.25867	0.35203	3.57545	0.000349627	0.00212713
Gh_D12G0806	80.997	1.25862	0.391985	3.2109	0.00132322	0.0066747
Gh_D11G1555	175.387	1.2585	0.203952	6.17056	6.8e-10	1.26e-08
Gh_A07G0090	15.5792	1.25844	0.498318	2.52538	0.0115572	0.0409949
Gh_D11G0742	44.2966	1.25837	0.337982	3.72319	0.000196724	0.00128859
Gh_D06G2284	5458.84	1.25826	0.201594	6.24155	4.33e-10	8.25e-09
Gh_A08G0018	81.0455	1.25793	0.364659	3.44961	0.000561394	0.00320607
Gh_D03G0862	143.48	1.25735	0.205513	6.11811	9.47e-10	1.73e-08
Gh_A04G0463	27.3724	1.25734	0.414832	3.03096	0.00243779	0.0112318
Gh_Sca177632G01	20.4412	1.25693	0.478129	2.62884	0.00856762	0.0320751
Gh_A12G2727	46.3069	1.25645	0.294115	4.27197	1.94e-05	0.000164127
Gh_A12G0028	19.0151	1.25622	0.460753	2.72644	0.00640213	0.0251822
Gh_A02G0454	49.1442	1.25619	0.346567	3.62467	0.000289333	0.00180476
Gh_D10G2618	35.4731	1.2559	0.489884	2.56367	0.0103573	0.0374751
Gh_A05G2149	53.0187	1.25529	0.372679	3.36829	0.000756355	0.00414722
Gh_A13G0818	975.047	1.25528	0.162122	7.74279	9.73e-15	3.32e-13
Gh_A07G0213	174.133	1.25477	0.196194	6.39555	1.6e-10	3.23e-09
Gh_A09G0438	190.572	1.25454	0.201843	6.21539	5.12e-10	9.66e-09
Gh_D02G0128	65.8539	1.25435	0.332896	3.76799	0.000164566	0.00110146
Gh_D12G1051	24.6193	1.25395	0.48598	2.58025	0.00987274	0.0360305
Gh_A09G1107	2520.76	1.25393	0.145486	8.61887	6.76e-18	3.15e-16
Gh_D07G2479	446.145	1.25331	0.332158	3.77325	0.000161137	0.00108249
Gh_D04G0041	390.669	1.25283	0.158052	7.92667	2.25e-15	8.2e-14
Gh_A09G2245	57.2043	1.25276	0.277716	4.51092	6.45e-06	6.05e-05
Gh_A09G1551	134.326	1.25266	0.234836	5.3342	9.6e-08	1.28e-06
Gh_D04G1231	620.345	1.25235	0.19952	6.27681	3.46e-10	6.66e-09
Gh_D03G0884	53.7256	1.25214	0.346932	3.60919	0.000307155	0.00189845
Gh_D06G2156	114.612	1.25198	0.32191	3.88923	0.000100563	0.000712338
Gh_A11G2344	1820.88	1.2518	0.157554	7.94523	1.94e-15	7.14e-14
Gh_A12G1922	60.8345	1.25091	0.263901	4.7401	2.14e-06	2.23e-05
Gh_A05G1989	607.417	1.25074	0.257432	4.85853	1.18e-06	1.3e-05
Gh_A01G1781	89.1669	1.25065	0.222613	5.61804	1.93e-08	2.89e-07
Gh_D02G1740	18.6329	1.25025	0.476988	2.62114	0.00876365	0.0326638
Gh_A08G0360	571.096	1.25013	0.157046	7.96029	1.72e-15	6.36e-14
Gh_A12G0700	767.293	1.24982	0.369563	3.3819	0.000719872	0.00397409
Gh_D05G3842	331.668	1.24959	0.343948	3.63309	0.000280049	0.00175473
Gh_A09G1209	221.981	1.24953	0.230207	5.42784	5.7e-08	7.92e-07
Gh_A02G0843	17.1013	1.24939	0.425167	2.93858	0.00329716	0.0144947
Gh_D05G2155	139.776	1.24916	0.283015	4.41378	1.02e-05	9.11e-05
Gh_A10G0201	746.731	1.24884	0.141289	8.83891	9.67e-19	4.81e-17
Gh_D12G2308	57.9103	1.24866	0.320893	3.89121	9.97e-05	0.000706955
Gh_D12G1617	56.7277	1.24862	0.27534	4.53481	5.77e-06	5.47e-05
Gh_A05G0159	16.0955	1.24858	0.448728	2.78248	0.00539454	0.0218635
Gh_D13G1700	124.372	1.24712	0.347999	3.5837	0.00033876	0.00206814
Gh_A12G1482	759.732	1.2471	0.111788	11.156	6.69e-29	6.46e-27
Gh_A06G2033	169.647	1.24708	0.237645	5.24768	1.54e-07	1.99e-06
Gh_D12G2546	34.5061	1.24638	0.373538	3.33669	0.000847814	0.00456962
Gh_D13G0281	283.796	1.24625	0.35291	3.53136	0.000413426	0.00246656
Gh_D05G2207	107.986	1.24604	0.354311	3.51682	0.000436757	0.00258494
Gh_D07G0551	32.9926	1.24562	0.383304	3.24969	0.00115532	0.00594611
Gh_A09G0304	45.8849	1.24512	0.405554	3.07018	0.00213932	0.0100537
Gh_D05G0136	10.5313	1.24503	0.455196	2.73516	0.00623503	0.0246392
Gh_D13G0854	57.6727	1.24494	0.301433	4.13008	3.63e-05	0.000286693
Gh_A07G1802	353.668	1.2447	0.242676	5.12904	2.91e-07	3.57e-06
Gh_D05G0195	17.2428	1.24386	0.467854	2.65866	0.00784525	0.0298087
Gh_D06G0181	1026.37	1.24374	0.107646	11.554	7.05e-31	7.62e-29
Gh_A02G1159	15.664	1.24355	0.421327	2.95151	0.00316221	0.0140007
Gh_A05G0387	142.737	1.24353	0.219094	5.67578	1.38e-08	2.13e-07
Gh_D08G1145	667.42	1.24311	0.364198	3.41328	0.000641853	0.00359928
Gh_A11G1953	73.0612	1.2431	0.455351	2.72997	0.00633403	0.0249598
Gh_D05G1198	396.604	1.24207	0.138465	8.97025	2.96e-19	1.53e-17
Gh_A01G1881	105.165	1.24183	0.310803	3.99557	6.45e-05	0.000480145
Gh_D09G1171	110.128	1.2418	0.310811	3.99535	6.46e-05	0.000480415
Gh_A07G1464	82.132	1.24165	0.443729	2.79822	0.00513859	0.0209808
Gh_D09G0245	61.6087	1.241	0.374704	3.31194	0.000926519	0.00491656
Gh_A10G1067	11.4785	1.24091	0.464584	2.67102	0.00756212	0.0289073
Gh_A08G0195	107.372	1.24062	0.35992	3.44693	0.000566986	0.00323326
Gh_A13G2293	53.0601	1.24049	0.46678	2.65755	0.00787106	0.0298834
Gh_D09G0059	648.312	1.24037	0.14899	8.32521	8.42e-17	3.55e-15
Gh_D12G0924	64.6351	1.23987	0.391018	3.17086	0.00151987	0.00751006
Gh_D02G0046	89.5874	1.23942	0.298598	4.15081	3.31e-05	0.000264684
Gh_A05G0299	83.9005	1.23937	0.456094	2.71736	0.00658047	0.0257603
Gh_A02G1065	367.521	1.23846	0.163486	7.57531	3.58e-14	1.15e-12
Gh_D12G0067	55.1801	1.23818	0.31413	3.9416	8.09e-05	0.000588134
Gh_D05G1488	55.702	1.23768	0.309868	3.99421	6.49e-05	0.000482543
Gh_A05G2814	56.604	1.23733	0.337217	3.66923	0.000243279	0.00155101
Gh_D08G1617	681.879	1.23716	0.255057	4.8505	1.23e-06	1.34e-05
Gh_A08G0002	196.495	1.23707	0.197342	6.26865	3.64e-10	6.99e-09
Gh_A09G1748	1467.04	1.23694	0.162963	7.59031	3.19e-14	1.03e-12
Gh_A05G1241	447.483	1.23672	0.437617	2.82604	0.00471275	0.0195197
Gh_D07G0057	2.10835	1.23656	0.484116	2.55426	0.0106415	0.0383155
Gh_A13G1089	22.1123	1.23558	0.361967	3.41352	0.000641294	0.00359683
Gh_A07G1957	635.019	1.2354	0.186727	6.61609	3.69e-11	8.06e-10
Gh_A01G0328	467.561	1.23481	0.300326	4.11155	3.93e-05	0.000308485
Gh_D02G1311	33.2369	1.23479	0.389189	3.17272	0.00151016	0.00747098
Gh_D07G0448	606.691	1.23454	0.18652	6.61882	3.62e-11	7.92e-10
Gh_A02G0032	85.4089	1.23409	0.291556	4.23278	2.31e-05	0.000192012
Gh_A13G0232	268.747	1.23325	0.157969	7.8069	5.86e-15	2.05e-13
Gh_A13G0256	583.513	1.2326	0.261447	4.71453	2.42e-06	2.5e-05
Gh_D12G1296	14.5607	1.23246	0.437898	2.81448	0.00488562	0.0201128
Gh_D01G0856	116.21	1.23234	0.284044	4.33856	1.43e-05	0.000124547
Gh_D08G0840	323.368	1.23233	0.200355	6.15074	7.71e-10	1.42e-08
Gh_A05G1019	121.701	1.23183	0.302898	4.06683	4.77e-05	0.000366282
Gh_A08G0766	15.5519	1.23134	0.497888	2.47313	0.0133935	0.0461712
Gh_A01G1439	1227.98	1.23043	0.415436	2.96179	0.00305855	0.0136141
Gh_D11G3176	19.2552	1.23038	0.401274	3.06617	0.00216819	0.0101697
Gh_D11G3261	95.976	1.23011	0.281647	4.36758	1.26e-05	0.000110535
Gh_D05G0711	14.9027	1.22994	0.504283	2.43899	0.0147283	0.0498357
Gh_D09G1105	952.59	1.22884	0.245386	5.0078	5.51e-07	6.41e-06
Gh_D07G2322	96.6072	1.22876	0.29147	4.21573	2.49e-05	0.000205031
Gh_D12G1534	1870.87	1.22845	0.427811	2.87147	0.00408567	0.0173425
Gh_A11G3176	605.224	1.22835	0.16808	7.30815	2.71e-13	7.93e-12
Gh_A04G0751	242.249	1.22834	0.199252	6.16476	7.06e-10	1.31e-08
Gh_D04G1420	16.2395	1.22786	0.393036	3.12403	0.00178392	0.00861189
Gh_A09G1854	4565.37	1.22733	0.142113	8.63632	5.81e-18	2.71e-16
Gh_A01G1023	322.147	1.22705	0.171744	7.14465	9.02e-13	2.46e-11
Gh_D13G1286	195.022	1.22698	0.358942	3.41831	0.000630106	0.00354192
Gh_D13G1189	35.7953	1.22655	0.469784	2.61088	0.00903094	0.0334611
Gh_A07G1786	414.223	1.2265	0.375138	3.26946	0.00107752	0.00559662
Gh_A07G0523	90.0837	1.22637	0.327624	3.74323	0.000181666	0.00120061
Gh_A03G1160	1056.26	1.22615	0.104755	11.7049	1.2e-31	1.35e-29
Gh_D11G0236	143.969	1.22564	0.294414	4.16296	3.14e-05	0.000252466
Gh_A05G1327	36.0385	1.22553	0.337837	3.62757	0.000286099	0.0017886
Gh_A12G0524	65.846	1.22542	0.304344	4.02645	5.66e-05	0.000426666
Gh_A10G1084	156.034	1.22531	0.244146	5.01874	5.2e-07	6.08e-06
Gh_A10G1194	76.7761	1.22509	0.275742	4.4429	8.88e-06	8.08e-05
Gh_A13G1737	125.381	1.22502	0.216633	5.65482	1.56e-08	2.38e-07
Gh_A08G1613	4.15533	1.22453	0.492493	2.48639	0.0129045	0.0448166
Gh_D11G1691	175.442	1.22416	0.404981	3.02275	0.00250487	0.0114864
Gh_A01G0725	301.869	1.22412	0.248937	4.91741	8.77e-07	9.85e-06
Gh_D11G0808	393.586	1.22384	0.136102	8.99213	2.42e-19	1.26e-17
Gh_D05G3160	22.2804	1.22339	0.380684	3.21365	0.00131058	0.00662356
Gh_D07G1446	1457.4	1.22272	0.18126	6.74564	1.52e-11	3.53e-10
Gh_A11G1003	1154.26	1.22225	0.140782	8.68181	3.9e-18	1.85e-16
Gh_A09G2087	1006.53	1.22217	0.272245	4.48922	7.15e-06	6.64e-05
Gh_A06G0030	6597.87	1.22188	0.19917	6.13489	8.52e-10	1.56e-08
Gh_A01G1234	236.198	1.2218	0.356497	3.42724	0.000609743	0.0034434
Gh_A07G0378	725.525	1.22172	0.399544	3.05777	0.00222989	0.0104122
Gh_A07G1062	126.455	1.22134	0.178201	6.85372	7.2e-12	1.75e-10
Gh_D11G3370	9.97027	1.22129	0.463943	2.63242	0.00847785	0.0317856
Gh_D03G0985	1007.5	1.22059	0.14093	8.66097	4.68e-18	2.2e-16
Gh_D12G1268	35.6741	1.22047	0.377778	3.23066	0.00123504	0.00629251
Gh_A12G1052	25.0549	1.22043	0.405565	3.00922	0.0026192	0.0119325
Gh_D13G1976	1143.2	1.21952	0.114938	10.6103	2.67e-26	2.22e-24
Gh_A12G1977	109.648	1.21943	0.30468	4.00234	6.27e-05	0.000468397
Gh_A13G0747	109.2	1.21939	0.281348	4.33409	1.46e-05	0.000126974
Gh_A08G0585	127.914	1.21887	0.218123	5.588	2.3e-08	3.4e-07
Gh_A13G1237	336.339	1.2188	0.204012	5.97413	2.31e-09	3.97e-08
Gh_A01G1103	59.1683	1.21867	0.297512	4.09622	4.2e-05	0.000327515
Gh_D11G0030	35.4517	1.21857	0.309073	3.94266	8.06e-05	0.000586045
Gh_A05G2013	164.912	1.21856	0.480613	2.53544	0.0112307	0.0400584
Gh_D04G1390	65.7377	1.21845	0.286099	4.25884	2.05e-05	0.000172939
Gh_A01G0308	312.38	1.21841	0.200941	6.06351	1.33e-09	2.37e-08
Gh_D01G0018	14490	1.21831	0.16935	7.19401	6.29e-13	1.75e-11
Gh_A07G0932	386.028	1.21812	0.31382	3.88159	0.000103774	0.000731793
Gh_D12G2049	232.402	1.21803	0.226974	5.3664	8.03e-08	1.09e-06
Gh_D03G1591	291.823	1.21766	0.316337	3.84926	0.000118477	0.00082509
Gh_A06G1085	869.992	1.21736	0.188611	6.45434	1.09e-10	2.25e-09
Gh_A01G1821	125.004	1.21694	0.29915	4.06798	4.74e-05	0.000364812
Gh_A08G0273	389.544	1.21693	0.153076	7.94986	1.87e-15	6.89e-14
Gh_D08G0093	155.544	1.21631	0.219177	5.54945	2.87e-08	4.18e-07
Gh_D06G0620	14.6737	1.21576	0.430776	2.82226	0.0047687	0.0197111
Gh_D01G2009	12.3491	1.21563	0.496855	2.44665	0.0144191	0.0490254
Gh_A04G0604	291.064	1.2156	0.17215	7.06126	1.65e-12	4.35e-11
Gh_A06G0238	104.976	1.21557	0.281361	4.32031	1.56e-05	0.00013453
Gh_A02G1415	32.9467	1.21556	0.451421	2.69275	0.00708664	0.0273959
Gh_A10G1707	310.504	1.21551	0.283778	4.28332	1.84e-05	0.000156791
Gh_A02G1781	2385.5	1.21542	0.148107	8.20638	2.28e-16	9.25e-15
Gh_A08G0995	54.6758	1.21511	0.28896	4.20512	2.61e-05	0.000213745
Gh_D03G0871	41.5944	1.215	0.323635	3.75421	0.000173889	0.00115602
Gh_D13G1249	16.3527	1.21444	0.443838	2.73622	0.00621494	0.0245686
Gh_D13G1549	1470.93	1.2141	0.330707	3.67124	0.000241378	0.00153973
Gh_Sca088654G01	8.04734	1.21396	0.490706	2.4739	0.0133646	0.0460823
Gh_D01G0153	40.2939	1.21392	0.36649	3.31228	0.000925378	0.0049114
Gh_D08G1556	2253.63	1.21371	0.170145	7.13341	9.79e-13	2.65e-11
Gh_A01G1484	76.0992	1.21326	0.243186	4.989	6.07e-07	7.02e-06
Gh_D02G0999	104.687	1.21318	0.412007	2.94455	0.00323427	0.0142602
Gh_D05G0682	45.4103	1.21227	0.289172	4.19221	2.76e-05	0.000224889
Gh_A02G1762	83.6695	1.21217	0.284088	4.26686	1.98e-05	0.000167659
Gh_A11G2587	455.326	1.21215	0.363491	3.33475	0.000853769	0.00459577
Gh_D12G1753	620.234	1.21172	0.225625	5.37051	7.85e-08	1.07e-06
Gh_A07G0086	65.8833	1.2114	0.355574	3.40688	0.000657092	0.00367132
Gh_A10G1435	67.1066	1.21132	0.306377	3.95368	7.7e-05	0.000562625
Gh_A05G3527	194.055	1.21059	0.166957	7.25089	4.14e-13	1.18e-11
Gh_A01G0877	762.428	1.20924	0.274397	4.40689	1.05e-05	9.39e-05
Gh_Sca004717G01	355.909	1.20913	0.303783	3.98026	6.88e-05	0.000509539
Gh_D13G1032	14.2487	1.20912	0.447551	2.70164	0.00689981	0.026798
Gh_A11G0414	205.309	1.20905	0.319388	3.78552	0.000153386	0.0010367
Gh_Sca017622G01	1067.79	1.20725	0.399146	3.02459	0.00248972	0.0114313
Gh_D06G1981	18.0617	1.20724	0.400619	3.01345	0.00258299	0.0117862
Gh_A11G1384	45.0858	1.20689	0.308439	3.91288	9.12e-05	0.000654062
Gh_D03G1059	33.8202	1.20654	0.3943	3.05996	0.00221366	0.0103488
Gh_A12G1688	176.98	1.2065	0.17538	6.87938	6.01e-12	1.48e-10
Gh_A10G1979	288.377	1.20584	0.193131	6.24362	4.28e-10	8.15e-09
Gh_A05G3349	296.063	1.20546	0.285626	4.22042	2.44e-05	0.000201466
Gh_D11G0787	863.204	1.20531	0.146798	8.21067	2.2e-16	8.95e-15
Gh_A11G1720	7.98458	1.20495	0.482828	2.49562	0.0125738	0.0439064
Gh_A07G0003	145.629	1.20487	0.33174	3.63198	0.000281254	0.00176152
Gh_A08G2542	2388.55	1.2045	0.398317	3.02397	0.0024948	0.0114474
Gh_Sca004842G04	128.416	1.20445	0.261826	4.60018	4.22e-06	4.13e-05
Gh_D04G0463	216.963	1.20441	0.170823	7.05063	1.78e-12	4.69e-11
Gh_D12G0266	1405.2	1.20373	0.157151	7.6597	1.86e-14	6.17e-13
Gh_D04G0091	57.1908	1.20316	0.300078	4.00951	6.08e-05	0.000455814
Gh_D04G0626	122.491	1.20189	0.385902	3.11448	0.00184267	0.00885299
Gh_A13G1695	236.712	1.20159	0.175246	6.8566	7.05e-12	1.72e-10
Gh_A11G0734	1423.3	1.20149	0.144816	8.29667	1.07e-16	4.48e-15
Gh_A05G0552	8731.42	1.20113	0.336695	3.5674	0.000360543	0.00218375
Gh_Sca118831G01	96.1908	1.20093	0.38006	3.15983	0.00157859	0.0077601
Gh_A10G0196	155.532	1.20023	0.208373	5.75998	8.41e-09	1.33e-07
Gh_A06G0708	1831.99	1.20021	0.119435	10.0491	9.27e-24	6.47e-22
Gh_A05G0127	1889.27	1.19969	0.203227	5.90321	3.56e-09	5.94e-08
Gh_A11G1556	1345.69	1.19919	0.117005	10.249	1.2e-24	8.86e-23
Gh_D06G1230	108.736	1.19915	0.208166	5.76054	8.38e-09	1.33e-07
Gh_D13G0680	3839.16	1.19896	0.175891	6.81654	9.33e-12	2.23e-10
Gh_A03G1301	87.2353	1.19879	0.264723	4.52846	5.94e-06	5.61e-05
Gh_D05G1730	11.8302	1.19855	0.482707	2.48297	0.0130291	0.0451796
Gh_A12G0900	790.882	1.1981	0.201423	5.94819	2.71e-09	4.6e-08
Gh_A04G0122	12.9723	1.19694	0.450308	2.65805	0.00785944	0.0298509
Gh_D02G0372	75.1981	1.19633	0.291087	4.10988	3.96e-05	0.000310473
Gh_D01G0370	250.622	1.19623	0.235645	5.0764	3.85e-07	4.6e-06
Gh_A11G2069	312.369	1.19569	0.278848	4.28795	1.8e-05	0.000153806
Gh_D10G0111	231.801	1.19499	0.186664	6.40183	1.54e-10	3.1e-09
Gh_A13G2078	64.5895	1.19455	0.453721	2.63278	0.00846893	0.0317623
Gh_Sca039063G01	37.108	1.19454	0.34795	3.43308	0.000596772	0.00337734
Gh_D13G1764	63.0807	1.19436	0.363626	3.28459	0.0010213	0.00534505
Gh_A11G1301	86.6564	1.1941	0.283848	4.20681	2.59e-05	0.000212333
Gh_A13G0636	1206.82	1.194	0.152004	7.85503	4e-15	1.42e-13
Gh_D02G0133	39.5233	1.19396	0.381567	3.1291	0.0017534	0.00848352
Gh_D06G0290	82.2916	1.19381	0.271099	4.40361	1.06e-05	9.51e-05
Gh_D06G0234	21.7181	1.19361	0.378251	3.15561	0.00160163	0.00785747
Gh_D04G1714	288.032	1.19351	0.297059	4.01776	5.88e-05	0.000441104
Gh_D10G0234	359.131	1.19342	0.336024	3.55159	0.000382918	0.00230347
Gh_A05G0409	34.2116	1.19327	0.412613	2.89199	0.00382805	0.0164176
Gh_Sca025643G01	18.2754	1.19283	0.375954	3.1728	0.00150976	0.00747023
Gh_D06G2272	186.852	1.19283	0.32169	3.708	0.000208906	0.00135762
Gh_D12G0947	58.8021	1.1924	0.32045	3.72101	0.000198428	0.00129844
Gh_D05G3877	16.3097	1.19205	0.468383	2.54503	0.0109267	0.0391733
Gh_A10G1606	73.8259	1.19198	0.368311	3.23633	0.00121077	0.00618399
Gh_A07G0199	181.243	1.19198	0.268572	4.43821	9.07e-06	8.24e-05
Gh_D11G3480	1399.81	1.19182	0.119016	10.0139	1.32e-23	9.18e-22
Gh_A13G0105	297.107	1.19165	0.417492	2.8543	0.00431318	0.0181418
Gh_D08G0498	146.935	1.19163	0.217848	5.46999	4.5e-08	6.33e-07
Gh_Sca005566G01	132.234	1.19099	0.234284	5.08351	3.71e-07	4.45e-06
Gh_D10G0951	64.8268	1.1902	0.240887	4.94091	7.78e-07	8.82e-06
Gh_D01G1138	73.1194	1.19017	0.272346	4.37005	1.24e-05	0.00010944
Gh_A11G3264	75.7991	1.18975	0.293366	4.0555	5e-05	0.000382632
Gh_D08G0878	68.6941	1.18938	0.26336	4.51617	6.3e-06	5.91e-05
Gh_D08G0512	665.624	1.18905	0.109528	10.856	1.87e-27	1.64e-25
Gh_D13G2345	280.195	1.18899	0.172285	6.90131	5.15e-12	1.28e-10
Gh_A05G3489	52.229	1.18871	0.448743	2.64899	0.00807333	0.0305281
Gh_A04G0349	794.394	1.18862	0.160504	7.40555	1.31e-13	3.98e-12
Gh_A09G0532	114.602	1.18832	0.487025	2.43995	0.0146892	0.0497264
Gh_D06G1157	660.478	1.18813	0.207179	5.73481	9.76e-09	1.53e-07
Gh_A05G1935	690.322	1.1879	0.185322	6.40992	1.46e-10	2.95e-09
Gh_D07G1034	114.653	1.18776	0.392921	3.0229	0.00250362	0.0114824
Gh_D10G2533	160.281	1.18771	0.230584	5.15087	2.59e-07	3.22e-06
Gh_A08G1494	65.3652	1.18759	0.281924	4.21246	2.53e-05	0.000207547
Gh_D06G1434	441.763	1.18751	0.190559	6.23171	4.61e-10	8.77e-09
Gh_D09G2359	93.8404	1.18742	0.263424	4.50766	6.55e-06	6.13e-05
Gh_A11G0680	46.6796	1.18645	0.315619	3.75912	0.000170514	0.00113677
Gh_D07G0691	1758.5	1.18623	0.222039	5.34243	9.17e-08	1.23e-06
Gh_A06G0535	31.6176	1.18622	0.38518	3.07965	0.00207247	0.00977814
Gh_A08G2290	900.508	1.18614	0.169071	7.01565	2.29e-12	5.94e-11
Gh_D11G0451	164.862	1.18603	0.179214	6.61799	3.64e-11	7.96e-10
Gh_D05G1176	41.4974	1.18585	0.332146	3.57026	0.000356628	0.00216273
Gh_D03G1563	57.1236	1.18549	0.345141	3.4348	0.000592984	0.00336113
Gh_D07G1726	280.468	1.18512	0.445617	2.6595	0.00782564	0.0297497
Gh_D04G1920	158.871	1.18413	0.171723	6.89559	5.36e-12	1.33e-10
Gh_A10G0169	277.884	1.18363	0.178234	6.6409	3.12e-11	6.89e-10
Gh_A05G0167	2215.05	1.18358	0.130667	9.05804	1.33e-19	7.05e-18
Gh_D03G0502	4.99024	1.18333	0.470651	2.51425	0.0119286	0.0420641
Gh_A12G1832	95.0206	1.18317	0.244381	4.84151	1.29e-06	1.4e-05
Gh_D10G1721	56.0725	1.18308	0.404748	2.923	0.00346675	0.0151149
Gh_D07G1899	55.935	1.18306	0.28314	4.17836	2.94e-05	0.000237543
Gh_A03G0901	2896.96	1.18305	0.25757	4.59312	4.37e-06	4.27e-05
Gh_D05G1719	30.9371	1.18296	0.407594	2.9023	0.00370434	0.0159846
Gh_D10G0599	1033	1.18247	0.144814	8.16545	3.2e-16	1.28e-14
Gh_Sca010496G01	33.0157	1.18178	0.341954	3.45596	0.000548344	0.00314263
Gh_A08G2531	470.851	1.1813	0.461601	2.55915	0.0104929	0.0378594
Gh_A03G1001	56.611	1.18104	0.315938	3.73821	0.000185336	0.00122209
Gh_D12G1944	198.177	1.18102	0.209628	5.6339	1.76e-08	2.66e-07
Gh_D12G1811	14.8847	1.1806	0.466292	2.53189	0.011345	0.0404045
Gh_A11G0461	34.5047	1.18041	0.456486	2.58587	0.00971336	0.0355289
Gh_D02G1463	14.8399	1.18005	0.409271	2.8833	0.00393533	0.0167998
Gh_D01G0634	868.57	1.17838	0.138012	8.53825	1.36e-17	6.17e-16
Gh_D06G0030	439.125	1.17835	0.255173	4.61783	3.88e-06	3.82e-05
Gh_D13G2451	12.0696	1.17779	0.464481	2.53572	0.0112216	0.0400331
Gh_A07G1274	133.34	1.17747	0.392838	2.99733	0.00272352	0.0123233
Gh_A10G0305	109.829	1.17723	0.309805	3.79992	0.000144743	0.000984263
Gh_D11G3400	17.778	1.17704	0.375621	3.13358	0.00172685	0.00837663
Gh_D09G1274	495.202	1.177	0.159243	7.39123	1.45e-13	4.41e-12
Gh_A03G2116	24.8436	1.17674	0.41554	2.83183	0.00462826	0.0192436
Gh_A13G2241	541.254	1.17624	0.160869	7.31178	2.64e-13	7.75e-12
Gh_D07G1658	36.8859	1.17599	0.38066	3.08935	0.00200598	0.00950906
Gh_D09G1816	37.2803	1.17585	0.43958	2.67494	0.00747434	0.028644
Gh_D03G0256	4087.93	1.17529	0.201383	5.83607	5.34e-09	8.71e-08
Gh_A05G3786	265.931	1.17492	0.252429	4.65447	3.25e-06	3.26e-05
Gh_A13G0939	34.8595	1.17459	0.466255	2.51921	0.0117618	0.0416015
Gh_D05G0429	3202.09	1.17433	0.193669	6.06361	1.33e-09	2.37e-08
Gh_A04G1120	163.834	1.17417	0.224602	5.2278	1.72e-07	2.19e-06
Gh_D12G1456	247.636	1.17399	0.213121	5.50859	3.62e-08	5.17e-07
Gh_A13G1806	139.267	1.17393	0.376786	3.11563	0.0018355	0.0088251
Gh_D09G1309	90.6908	1.17372	0.259424	4.52432	6.06e-06	5.71e-05
Gh_A05G0850	1753.56	1.17371	0.102023	11.5043	1.25e-30	1.33e-28
Gh_A08G0130	41.589	1.17363	0.329273	3.56432	0.000364802	0.00220633
Gh_D09G1622	212.009	1.17339	0.209292	5.60644	2.07e-08	3.08e-07
Gh_A10G0809	647.779	1.17331	0.157978	7.42703	1.11e-13	3.4e-12
Gh_A01G0019	11711.7	1.17324	0.187941	6.24258	4.3e-10	8.2e-09
Gh_A10G1745	887.242	1.17316	0.1158	10.1309	4.03e-24	2.88e-22
Gh_D09G0961	58.1424	1.17304	0.30595	3.8341	0.000126025	0.00087102
Gh_A02G0379	330.8	1.17265	0.301586	3.88827	0.000100962	0.0007149
Gh_D01G0562	23.2909	1.17242	0.439607	2.66698	0.00765355	0.0291868
Gh_D11G2207	23.6245	1.17217	0.410254	2.85718	0.00427418	0.0179972
Gh_D03G1752	117.921	1.17215	0.472888	2.47871	0.0131859	0.0455932
Gh_D02G0717	26.7006	1.17208	0.435936	2.68864	0.00717429	0.0276943
Gh_A12G2504	74.5447	1.17162	0.267251	4.38397	1.17e-05	0.000103247
Gh_D11G0279	202.654	1.17147	0.370152	3.16482	0.00155177	0.00765279
Gh_A02G0519	402.628	1.1712	0.164692	7.11145	1.15e-12	3.08e-11
Gh_A05G0581	24.451	1.17117	0.479197	2.44401	0.0145248	0.0492872
Gh_A07G2348	2466.03	1.171	0.21833	5.36343	8.17e-08	1.11e-06
Gh_A02G1313	490.294	1.17018	0.391149	2.99164	0.00277484	0.0125253
Gh_D01G0299	241.741	1.16993	0.240981	4.85486	1.2e-06	1.32e-05
Gh_D13G0550	177.255	1.16959	0.244303	4.78747	1.69e-06	1.8e-05
Gh_D11G1693	525.352	1.16925	0.389465	3.00219	0.00268046	0.012155
Gh_D07G0238	32.0516	1.16913	0.355071	3.29266	0.000992429	0.00521363
Gh_D10G0388	86.4459	1.16882	0.358913	3.25656	0.00112772	0.00582103
Gh_A11G0118	42.5046	1.1686	0.418986	2.78911	0.00528524	0.0214818
Gh_A08G0202	693.139	1.16859	0.152219	7.67707	1.63e-14	5.42e-13
Gh_A13G0121	1125.83	1.16717	0.13192	8.84756	8.95e-19	4.47e-17
Gh_A04G0781	47.3432	1.16701	0.324403	3.59742	0.000321395	0.00197516
Gh_D08G0712	58.0535	1.16697	0.31189	3.74161	0.000182842	0.00120769
Gh_A11G0749	167.749	1.1669	0.263234	4.43292	9.3e-06	8.42e-05
Gh_A09G1179	174.439	1.16685	0.339163	3.44038	0.000580904	0.003301
Gh_D05G0628	1110.03	1.16664	0.239958	4.86183	1.16e-06	1.28e-05
Gh_A05G0054	914.418	1.16649	0.136394	8.55231	1.21e-17	5.49e-16
Gh_A12G1613	463.173	1.16645	0.267589	4.3591	1.31e-05	0.000114471
Gh_A05G2710	476.512	1.16616	0.167444	6.96448	3.3e-12	8.38e-11
Gh_D07G0556	3173.81	1.16526	0.130034	8.96118	3.21e-19	1.65e-17
Gh_A06G1003	90.8259	1.16524	0.289387	4.0266	5.66e-05	0.000426448
Gh_D09G0007	1029.71	1.1647	0.114448	10.1767	2.52e-24	1.85e-22
Gh_A06G1027	65.9237	1.16433	0.267911	4.34596	1.39e-05	0.000120745
Gh_D11G1936	145.775	1.16428	0.244664	4.7587	1.95e-06	2.05e-05
Gh_D08G2296	23.1656	1.16428	0.389733	2.98737	0.00281385	0.0126828
Gh_D13G2085	77.2667	1.16409	0.265192	4.38963	1.14e-05	0.000100726
Gh_A06G0054	81.6274	1.16388	0.345841	3.36537	0.000764399	0.00418514
Gh_A12G0772	421.47	1.16375	0.334652	3.4775	0.000506118	0.00293292
Gh_A09G0430	384.708	1.16356	0.471763	2.46642	0.0136473	0.0468884
Gh_D13G2387	1152.95	1.16355	0.41301	2.81723	0.00484394	0.0199694
Gh_D02G0230	58.3865	1.16302	0.358864	3.24084	0.00119177	0.0061062
Gh_D10G0324	2313.67	1.16236	0.183391	6.33814	2.33e-10	4.59e-09
Gh_D05G1481	286.119	1.16219	0.146129	7.95313	1.82e-15	6.72e-14
Gh_D12G1454	109.024	1.16214	0.293158	3.96419	7.36e-05	0.000541264
Gh_A01G0805	1687.37	1.16197	0.149845	7.75446	8.87e-15	3.04e-13
Gh_A10G0134	114.166	1.16132	0.424984	2.73262	0.0062832	0.0247896
Gh_A08G0633	817.047	1.16086	0.120781	9.61124	7.17e-22	4.45e-20
Gh_D08G0806	89.8253	1.16053	0.242262	4.79038	1.66e-06	1.78e-05
Gh_A06G1879	272.251	1.16011	0.245276	4.72982	2.25e-06	2.33e-05
Gh_A06G0791	1473.76	1.15992	0.147264	7.87646	3.37e-15	1.21e-13
Gh_D10G2623	199.368	1.15989	0.21326	5.43888	5.36e-08	7.47e-07
Gh_A01G1959	1236.66	1.15972	0.156601	7.40557	1.31e-13	3.98e-12
Gh_A03G1432	2628.1	1.15927	0.327837	3.53612	0.000406058	0.0024269
Gh_A08G1171	146.177	1.15881	0.213565	5.42604	5.76e-08	8e-07
Gh_D11G2020	52.9872	1.15881	0.333098	3.47888	0.000503509	0.00291983
Gh_D11G0772	158.435	1.15842	0.194633	5.95182	2.65e-09	4.51e-08
Gh_A07G1132	46.8687	1.1581	0.356638	3.24726	0.00116523	0.00598761
Gh_A11G1360	31.8079	1.15796	0.343982	3.36635	0.000761702	0.00417261
Gh_A05G3824	438.602	1.15744	0.137167	8.43818	3.22e-17	1.41e-15
Gh_D10G2113	99.3049	1.15741	0.349089	3.31551	0.000914776	0.00486398
Gh_A10G0450	352.067	1.15718	0.141402	8.18357	2.76e-16	1.11e-14
Gh_D09G1302	217.565	1.15703	0.47134	2.45477	0.0140975	0.0481171
Gh_D12G2434	171.122	1.15676	0.455818	2.53778	0.0111559	0.0398357
Gh_A11G2216	1054.1	1.15601	0.139081	8.3118	9.43e-17	3.96e-15
Gh_D10G0696	408.572	1.15508	0.150938	7.65267	1.97e-14	6.49e-13
Gh_D12G2373	49.6617	1.15501	0.346428	3.33405	0.000855913	0.00460603
Gh_A12G0724	54.0558	1.1548	0.345268	3.34465	0.000823876	0.00446205
Gh_A06G0949	11.7512	1.15441	0.452071	2.55359	0.0106618	0.0383697
Gh_D02G1137	201.306	1.15431	0.229697	5.02533	5.03e-07	5.89e-06
Gh_D12G2069	25.5712	1.15424	0.441736	2.61295	0.00897637	0.0333032
Gh_A02G0513	1635.5	1.15399	0.209239	5.51516	3.48e-08	5e-07
Gh_A11G0482	16.5952	1.15382	0.424772	2.71634	0.00660086	0.0258254
Gh_A03G0372	125.936	1.1533	0.252801	4.56207	5.07e-06	4.87e-05
Gh_D13G2176	68.1658	1.15318	0.401949	2.86898	0.00411804	0.0174482
Gh_D02G0135	45.2053	1.15262	0.360722	3.19531	0.00139681	0.00699148
Gh_D05G0872	644.454	1.15261	0.161989	7.11534	1.12e-12	3e-11
Gh_A11G1002	668.925	1.1526	0.217872	5.29025	1.22e-07	1.61e-06
Gh_A05G2615	241.645	1.15189	0.22357	5.15226	2.57e-07	3.2e-06
Gh_A04G1063	237.219	1.1518	0.219167	5.25534	1.48e-07	1.92e-06
Gh_D10G2442	204.127	1.15174	0.193885	5.94035	2.84e-09	4.8e-08
Gh_A04G0678	361.238	1.15165	0.167259	6.88545	5.76e-12	1.42e-10
Gh_D02G0931	583.613	1.15132	0.201104	5.725	1.03e-08	1.62e-07
Gh_A10G0316	109.871	1.1513	0.356503	3.22943	0.00124036	0.00631633
Gh_A05G0658	978.762	1.1513	0.141113	8.15869	3.39e-16	1.35e-14
Gh_A08G0371	38.5306	1.15128	0.336191	3.42448	0.000615986	0.0034726
Gh_A01G1826	1262.16	1.15111	0.177604	6.48133	9.09e-11	1.89e-09
Gh_D11G3242	31.9178	1.15111	0.350228	3.28675	0.0010135	0.00530951
Gh_A08G0525	1976.11	1.15107	0.112568	10.2255	1.52e-24	1.12e-22
Gh_A10G1461	511.997	1.15097	0.203874	5.64546	1.65e-08	2.5e-07
Gh_A06G1417	434.113	1.15069	0.131422	8.75571	2.03e-18	9.86e-17
Gh_D10G0533	19.8892	1.15054	0.405834	2.83501	0.00458244	0.0190898
Gh_A04G0335	27.1558	1.15022	0.393438	2.9235	0.0034612	0.0150952
Gh_A11G0082	948.551	1.14988	0.259107	4.43787	9.09e-06	8.26e-05
Gh_A05G3546	240.684	1.14961	0.194135	5.9217	3.19e-09	5.35e-08
Gh_A09G1771	219.632	1.14943	0.295231	3.89332	9.89e-05	0.0007018
Gh_D13G1594	24.8319	1.1488	0.38889	2.95405	0.00313635	0.0139052
Gh_A13G1177	94.3521	1.14853	0.317357	3.61905	0.000295687	0.00183751
Gh_A13G0332	12.9271	1.14847	0.419672	2.7366	0.00620786	0.0245439
Gh_D10G1394	15.6741	1.14843	0.396455	2.89674	0.00377064	0.0162107
Gh_A12G1607	16.1589	1.14842	0.461799	2.48684	0.0128884	0.044766
Gh_D09G1857	1291.42	1.14817	0.168525	6.81304	9.56e-12	2.28e-10
Gh_D13G1154	59.3294	1.14802	0.353589	3.24677	0.00116723	0.00599632
Gh_D12G1369	228.695	1.14795	0.205384	5.58931	2.28e-08	3.38e-07
Gh_D05G3773	61.794	1.14785	0.253798	4.52269	6.11e-06	5.75e-05
Gh_D10G0421	336.896	1.14722	0.160098	7.1657	7.74e-13	2.12e-11
Gh_D08G2555	89.1505	1.1471	0.235828	4.86412	1.15e-06	1.26e-05
Gh_A09G0764	35156	1.14682	0.153983	7.4477	9.5e-14	2.93e-12
Gh_A08G1428	68.1478	1.14622	0.282133	4.0627	4.85e-05	0.000372041
Gh_A11G1638	379.366	1.14602	0.174526	6.5665	5.15e-11	1.1e-09
Gh_A09G0537	116.522	1.14568	0.289198	3.96158	7.45e-05	0.000545974
Gh_A07G0774	121.913	1.14548	0.406468	2.81813	0.00483043	0.0199193
Gh_A01G1768	98.5734	1.14542	0.291014	3.93596	8.29e-05	0.000600015
Gh_D13G2373	20.7429	1.1454	0.455833	2.51276	0.0119791	0.0422114
Gh_A05G0505	374.141	1.14505	0.182634	6.26968	3.62e-10	6.95e-09
Gh_A03G2074	44.1992	1.14473	0.318244	3.59703	0.000321871	0.00197746
Gh_D11G0557	56.0699	1.14459	0.278989	4.10265	4.08e-05	0.00031936
Gh_D06G2116	5328.1	1.14443	0.131872	8.67834	4.02e-18	1.9e-16
Gh_A10G0052	122.852	1.14437	0.245268	4.66581	3.07e-06	3.09e-05
Gh_D04G0608	88.7516	1.1441	0.246442	4.64245	3.44e-06	3.43e-05
Gh_D08G1885	262.557	1.1435	0.23686	4.82776	1.38e-06	1.49e-05
Gh_D03G1258	283.84	1.14345	0.204241	5.59855	2.16e-08	3.22e-07
Gh_A05G0315	1853.74	1.14327	0.122521	9.33119	1.05e-20	6.02e-19
Gh_D02G0839	27.8503	1.143	0.3967	2.88127	0.0039607	0.0168908
Gh_A10G2185	16.618	1.14155	0.424599	2.68853	0.00717676	0.0277005
Gh_A04G0623	25920.3	1.14099	0.150222	7.59533	3.07e-14	9.93e-13
Gh_Sca066287G01	141.061	1.14092	0.348858	3.27044	0.00107379	0.00558172
Gh_A12G0266	125.838	1.14074	0.190905	5.97542	2.3e-09	3.94e-08
Gh_A03G0524	452.104	1.1399	0.367391	3.10269	0.00191769	0.00915905
Gh_D07G1906	485.128	1.13976	0.23775	4.79394	1.64e-06	1.75e-05
Gh_A11G2642	108.175	1.13974	0.446021	2.55535	0.010608	0.0382162
Gh_D05G3014	341.507	1.13945	0.202232	5.63436	1.76e-08	2.65e-07
Gh_A12G1167	238.086	1.13936	0.25816	4.41337	1.02e-05	9.13e-05
Gh_A06G0779	491.345	1.13924	0.202607	5.62288	1.88e-08	2.82e-07
Gh_A11G0200	99.096	1.13921	0.238037	4.78585	1.7e-06	1.81e-05
Gh_D06G2353	79.5223	1.1392	0.307228	3.70798	0.000208916	0.00135762
Gh_A09G2441	2851.98	1.13851	0.147422	7.7228	1.14e-14	3.85e-13
Gh_D11G2900	216.339	1.13673	0.307719	3.69404	0.000220719	0.00142526
Gh_A04G0806	138.476	1.13649	0.302474	3.75732	0.000171744	0.00114372
Gh_D06G0265	330.937	1.13639	0.167222	6.79567	1.08e-11	2.55e-10
Gh_D04G0120	172.175	1.13636	0.322209	3.52676	0.00042067	0.00250396
Gh_D09G1677	113.934	1.13631	0.22158	5.12823	2.92e-07	3.59e-06
Gh_A12G2067	79.4982	1.13583	0.238286	4.76664	1.87e-06	1.98e-05
Gh_D12G0899	88.1405	1.13527	0.374272	3.03329	0.00241905	0.0111622
Gh_D11G0569	29.6841	1.13493	0.427206	2.65664	0.00789244	0.0299509
Gh_A06G1485	60.2563	1.13488	0.303233	3.74261	0.000182118	0.00120319
Gh_D04G1686	59.7241	1.13485	0.270229	4.19958	2.67e-05	0.00021858
Gh_D06G0393	830.39	1.13456	0.125152	9.06539	1.24e-19	6.62e-18
Gh_A05G2917	36.3739	1.13427	0.34209	3.31572	0.000914065	0.00486109
Gh_D08G0842	491.298	1.13427	0.154975	7.31907	2.5e-13	7.37e-12
Gh_A08G1144	397.648	1.13424	0.243989	4.64872	3.34e-06	3.34e-05
Gh_A07G1961	1463.08	1.13386	0.457945	2.47597	0.0132875	0.0458762
Gh_D09G0470	159.043	1.13339	0.293243	3.865	0.000111088	0.000778423
Gh_A06G0016	69.5145	1.13337	0.230446	4.91818	8.74e-07	9.82e-06
Gh_D04G0480	55.63	1.13327	0.33057	3.42824	0.000607499	0.00343205
Gh_A09G0273	322.862	1.13309	0.156338	7.24773	4.24e-13	1.21e-11
Gh_D02G2023	190.339	1.13298	0.382614	2.96117	0.00306474	0.0136338
Gh_D05G1274	97.113	1.13286	0.268911	4.21276	2.52e-05	0.00020734
Gh_D04G0504	38.0281	1.13272	0.404686	2.79901	0.00512592	0.0209394
Gh_A07G2231	1160.94	1.13272	0.160328	7.065	1.61e-12	4.25e-11
Gh_D06G0897	115.738	1.13188	0.196181	5.7696	7.95e-09	1.27e-07
Gh_A12G2231	401.154	1.13187	0.281808	4.01645	5.91e-05	0.000443455
Gh_A08G0600	35.56	1.13086	0.290149	3.89753	9.72e-05	0.000691562
Gh_A11G2415	50.0843	1.13075	0.309652	3.65167	0.000260541	0.00164826
Gh_A07G0785	348.809	1.13056	0.20149	5.61101	2.01e-08	3e-07
Gh_D10G0699	47.2043	1.13037	0.457378	2.47142	0.0134577	0.046346
Gh_D03G1284	215.731	1.13037	0.206	5.48724	4.08e-08	5.79e-07
Gh_A01G0394	148.975	1.13027	0.206352	5.47737	4.32e-08	6.09e-07
Gh_A10G2154	299.033	1.13023	0.16863	6.70245	2.05e-11	4.66e-10
Gh_A03G0329	27.436	1.12997	0.370518	3.04971	0.00229061	0.0106481
Gh_D11G3315	395.394	1.12986	0.19772	5.71444	1.1e-08	1.72e-07
Gh_D08G1183	75.7813	1.12934	0.219284	5.15013	2.6e-07	3.23e-06
Gh_A09G1156	65.2553	1.12929	0.254831	4.43154	9.36e-06	8.47e-05
Gh_D03G1145	1462.06	1.12905	0.339045	3.3301	0.000868137	0.00465892
Gh_A06G1121	271.541	1.12873	0.44089	2.56012	0.0104636	0.0377825
Gh_A05G2263	964.119	1.12867	0.121361	9.3001	1.4e-20	7.98e-19
Gh_D03G0320	288.063	1.12863	0.202877	5.56313	2.65e-08	3.89e-07
Gh_A05G2364	812.07	1.12825	0.14719	7.66524	1.78e-14	5.93e-13
Gh_A11G0277	14.1991	1.12825	0.460357	2.45081	0.0142534	0.0485498
Gh_D08G1640	228.117	1.12788	0.192554	5.85748	4.7e-09	7.72e-08
Gh_D05G3110	469.544	1.12766	0.183273	6.15289	7.61e-10	1.4e-08
Gh_D06G1831	323.411	1.12759	0.20517	5.49588	3.89e-08	5.53e-07
Gh_D12G1514	64.3134	1.12742	0.331703	3.39887	0.000676638	0.00376429
Gh_D03G1732	35.3346	1.12702	0.34554	3.26162	0.00110777	0.00573479
Gh_A10G0359	72.4423	1.12701	0.408666	2.75778	0.0058195	0.023264
Gh_A06G0031	7964.5	1.1263	0.175187	6.42917	1.28e-10	2.63e-09
Gh_D09G0401	176.581	1.12625	0.311543	3.61506	0.000300273	0.00186263
Gh_A03G1364	554.568	1.126	0.191608	5.87659	4.19e-09	6.92e-08
Gh_A08G2383	62.0517	1.12582	0.301786	3.73051	0.000191091	0.00125663
Gh_A09G1497	114.287	1.12579	0.221097	5.09187	3.55e-07	4.28e-06
Gh_A03G1181	18.8936	1.12548	0.414004	2.71853	0.00655727	0.025685
Gh_A11G3163	646.324	1.12545	0.23975	4.69426	2.68e-06	2.73e-05
Gh_A08G2143	38.6858	1.12533	0.34424	3.26904	0.00107913	0.00560345
Gh_A07G0488	8998.35	1.12522	0.0987424	11.3956	4.4e-30	4.54e-28
Gh_A11G0127	1832.35	1.12416	0.171066	6.57153	4.98e-11	1.07e-09
Gh_A05G2823	219.907	1.12403	0.150419	7.47269	7.86e-14	2.45e-12
Gh_D06G1599	366.068	1.12385	0.182082	6.1722	6.73e-10	1.25e-08
Gh_A03G0889	788.739	1.12355	0.2467	4.55432	5.26e-06	5.04e-05
Gh_D10G1527	72.6191	1.12341	0.24019	4.67715	2.91e-06	2.95e-05
Gh_A13G1998	31.9461	1.12331	0.370541	3.03153	0.00243316	0.0112149
Gh_A07G1085	769.666	1.12308	0.130272	8.62102	6.64e-18	3.09e-16
Gh_A07G1883	188.314	1.12307	0.195359	5.74878	8.99e-09	1.42e-07
Gh_A10G0347	104.421	1.1229	0.352194	3.1883	0.00143114	0.00714187
Gh_D04G1732	193.399	1.12284	0.185074	6.06696	1.3e-09	2.33e-08
Gh_D03G0456	50.2142	1.12272	0.286335	3.92099	8.82e-05	0.000634597
Gh_D11G0271	58.4541	1.12266	0.432692	2.5946	0.00947013	0.034792
Gh_A02G0674	49.1084	1.12259	0.337733	3.3239	0.000887677	0.00474456
Gh_D05G3464	124.481	1.12218	0.431513	2.60058	0.00930662	0.0342929
Gh_D08G1192	1384.18	1.12184	0.158682	7.06974	1.55e-12	4.11e-11
Gh_A04G1404	1550.71	1.12152	0.137435	8.16034	3.34e-16	1.33e-14
Gh_A01G1751	37.1068	1.12141	0.324892	3.45165	0.000557175	0.00318729
Gh_A06G2071	285.341	1.12101	0.222515	5.03792	4.71e-07	5.55e-06
Gh_D11G0127	27.6068	1.12098	0.353863	3.16782	0.00153584	0.00758057
Gh_A12G1809	65.5268	1.12014	0.326874	3.42683	0.000610679	0.00344802
Gh_A11G0172	2.62763	1.11973	0.458837	2.44036	0.0146726	0.0496759
Gh_A03G0455	75.7657	1.11966	0.22806	4.90949	9.13e-07	1.02e-05
Gh_D09G1315	737.4	1.11955	0.142399	7.86207	3.78e-15	1.35e-13
Gh_D05G3602	253.828	1.11925	0.146666	7.63125	2.32e-14	7.6e-13
Gh_A06G1851	454.09	1.11921	0.451341	2.47975	0.0131474	0.0454926
Gh_A01G0907	466.087	1.11914	0.176184	6.3521	2.12e-10	4.21e-09
Gh_A10G1407	30.7592	1.11913	0.411565	2.7192	0.00654404	0.0256469
Gh_A11G0640	810.472	1.1191	0.137908	8.11488	4.86e-16	1.91e-14
Gh_A07G1827	46.3086	1.11882	0.394266	2.83773	0.00454355	0.0189535
Gh_D11G2983	57.9385	1.11878	0.282619	3.95862	7.54e-05	0.000552163
Gh_D13G0746	51.7322	1.11861	0.291299	3.84006	0.000123002	0.000853652
Gh_D05G1837	1340.59	1.11825	0.104064	10.7458	6.2e-27	5.36e-25
Gh_D13G0864	161.781	1.11755	0.197931	5.64616	1.64e-08	2.5e-07
Gh_A02G0676	76.3693	1.11754	0.241848	4.62083	3.82e-06	3.77e-05
Gh_D09G1459	888.838	1.11709	0.226102	4.94064	7.79e-07	8.82e-06
Gh_D06G1985	33.3455	1.11601	0.389994	2.86161	0.00421501	0.0178034
Gh_D09G2244	22.1265	1.11566	0.382323	2.91811	0.00352162	0.0153174
Gh_A01G2040	59.7591	1.11512	0.336259	3.31625	0.000912356	0.00485289
Gh_D08G2129	866.78	1.11486	0.233791	4.76862	1.85e-06	1.96e-05
Gh_A05G0803	1845.72	1.11444	0.099602	11.189	4.62e-29	4.51e-27
Gh_A06G2075	820.353	1.11408	0.156141	7.1351	9.67e-13	2.62e-11
Gh_D02G1310	28.0075	1.11406	0.395714	2.81532	0.00487288	0.0200702
Gh_D13G1001	833.172	1.11394	0.16434	6.77826	1.22e-11	2.86e-10
Gh_D12G0301	300.619	1.11385	0.194598	5.72382	1.04e-08	1.63e-07
Gh_A02G0263	74.126	1.11375	0.366176	3.04158	0.00235337	0.0108928
Gh_A08G2237	59.1153	1.11367	0.326376	3.41223	0.000644344	0.00361151
Gh_A02G0105	467.249	1.11364	0.20445	5.44702	5.12e-08	7.15e-07
Gh_D08G0048	528.475	1.11354	0.406718	2.73786	0.00618398	0.0244661
Gh_D09G0337	167.996	1.11338	0.241896	4.60274	4.17e-06	4.09e-05
Gh_A12G1476	70.8714	1.11333	0.246399	4.51839	6.23e-06	5.86e-05
Gh_A11G1668	109.444	1.11325	0.263495	4.22492	2.39e-05	0.000198073
Gh_A13G1616	239.977	1.113	0.207156	5.37275	7.75e-08	1.05e-06
Gh_D02G0141	645.698	1.11292	0.251837	4.41919	9.91e-06	8.91e-05
Gh_D02G1278	31.6473	1.11279	0.374013	2.97527	0.00292729	0.0131108
Gh_Sca044897G01	21.7301	1.11246	0.413857	2.68803	0.0071874	0.0277321
Gh_A11G3024	5096.25	1.11242	0.230016	4.83629	1.32e-06	1.43e-05
Gh_D06G0642	75.7263	1.11242	0.323295	3.4409	0.000579789	0.00329595
Gh_A08G1771	167.802	1.11202	0.170516	6.52152	6.96e-11	1.47e-09
Gh_A11G1407	204.435	1.11108	0.16005	6.94212	3.86e-12	9.74e-11
Gh_D09G0962	34.7608	1.11056	0.310882	3.5723	0.000353862	0.00214752
Gh_D12G1094	50.3363	1.11054	0.336206	3.30317	0.000955983	0.00504855
Gh_A02G0239	24.5307	1.11036	0.431274	2.5746	0.0100357	0.0365082
Gh_A05G1054	32.4115	1.11016	0.339732	3.26774	0.00108408	0.00562517
Gh_A05G0716	323.682	1.10946	0.187385	5.92073	3.21e-09	5.38e-08
Gh_A11G0111	27.4882	1.10935	0.402741	2.7545	0.00587824	0.0234603
Gh_D05G3295	1592.36	1.10933	0.137354	8.07639	6.67e-16	2.57e-14
Gh_D09G1175	120.262	1.10923	0.248402	4.46545	7.99e-06	7.35e-05
Gh_D09G1674	511.333	1.10895	0.300113	3.69512	0.000219782	0.00141953
Gh_Sca042871G01	55.6388	1.1081	0.33647	3.2933	0.000990179	0.00520368
Gh_D12G2762	36.9587	1.10781	0.336599	3.29119	0.000997642	0.00523724
Gh_D12G2089	1154.35	1.10769	0.122147	9.06853	1.21e-19	6.43e-18
Gh_D02G1796	552.816	1.10756	0.244778	4.52478	6.05e-06	5.7e-05
Gh_D06G0236	35.7027	1.10752	0.380068	2.91401	0.00356822	0.0154832
Gh_D13G0753	933.147	1.10711	0.137235	8.06722	7.19e-16	2.76e-14
Gh_D11G0476	74.6068	1.10577	0.301809	3.66381	0.000248493	0.00158097
Gh_D03G0412	1440.17	1.1055	0.350389	3.15507	0.00160461	0.00787008
Gh_D08G2192	2165.22	1.10543	0.350292	3.15572	0.00160101	0.00785572
Gh_A10G1371	1769.69	1.10534	0.172083	6.4233	1.33e-10	2.72e-09
Gh_A01G1620	181.231	1.10431	0.268535	4.11233	3.92e-05	0.000307651
Gh_A04G1008	3124.87	1.10413	0.147902	7.4653	8.31e-14	2.58e-12
Gh_D01G2120	296.801	1.10394	0.172248	6.409	1.46e-10	2.97e-09
Gh_A08G1032	456.281	1.10344	0.191163	5.77227	7.82e-09	1.25e-07
Gh_D02G2024	25.5523	1.10339	0.377957	2.91935	0.0035076	0.0152644
Gh_D12G0315	4728.26	1.10323	0.216637	5.09253	3.53e-07	4.26e-06
Gh_D05G3922	219.223	1.10322	0.259994	4.24325	2.2e-05	0.000184081
Gh_D02G1617	15.3218	1.10317	0.422898	2.60859	0.00909171	0.0336371
Gh_D05G2756	322.182	1.10307	0.399995	2.7577	0.00582092	0.0232681
Gh_A12G1612	1577.53	1.10281	0.211037	5.22567	1.74e-07	2.22e-06
Gh_A11G0359	62.8636	1.10272	0.44094	2.50085	0.0123897	0.0433881
Gh_D11G0318	92.5649	1.10256	0.295228	3.7346	0.000188016	0.00123809
Gh_D01G0498	146.858	1.10217	0.239628	4.5995	4.24e-06	4.15e-05
Gh_D01G1997	70.2668	1.10207	0.232982	4.73027	2.24e-06	2.33e-05
Gh_D03G1165	248.661	1.10193	0.194557	5.6638	1.48e-08	2.27e-07
Gh_A05G0582	308.104	1.1018	0.182453	6.03885	1.55e-09	2.73e-08
Gh_A05G2630	30.1003	1.1017	0.434888	2.53331	0.0112991	0.0402731
Gh_A06G2068	14.0628	1.1017	0.419165	2.62833	0.0085805	0.0321077
Gh_D13G1702	2901.94	1.10163	0.0967358	11.388	4.8e-30	4.93e-28
Gh_D05G0472	73.3727	1.10162	0.263597	4.17917	2.93e-05	0.000236764
Gh_D05G1758	108.553	1.10151	0.371414	2.96573	0.00301969	0.0134627
Gh_D08G2381	40.0069	1.10145	0.404655	2.72195	0.00648971	0.0254652
Gh_D11G2985	42.409	1.10125	0.358453	3.07222	0.00212475	0.00999567
Gh_A08G0173	2596.1	1.10071	0.139169	7.90912	2.59e-15	9.4e-14
Gh_A12G1626	86.4078	1.10068	0.294828	3.73329	0.000188998	0.00124399
Gh_A01G0894	206.908	1.10053	0.153109	7.18786	6.58e-13	1.82e-11
Gh_A12G0625	218.678	1.10026	0.180019	6.11193	9.84e-10	1.79e-08
Gh_D05G0257	151.162	1.1001	0.227593	4.83364	1.34e-06	1.45e-05
Gh_D05G3139	1730.59	1.09992	0.135759	8.10201	5.41e-16	2.11e-14
Gh_A04G1237	17.0491	1.09886	0.437073	2.51414	0.0119323	0.0420695
Gh_D07G0502	38.066	1.09868	0.326957	3.36033	0.000778487	0.00424899
Gh_D05G1628	138.032	1.09852	0.253527	4.33296	1.47e-05	0.000127572
Gh_A04G1247	45.0006	1.09844	0.303116	3.62384	0.000290263	0.0018092
Gh_D11G0908	24.8164	1.09804	0.406656	2.70017	0.00693038	0.0269006
Gh_D07G2128	244.721	1.09766	0.152007	7.22111	5.16e-13	1.45e-11
Gh_D11G2829	647.625	1.09765	0.134066	8.18736	2.67e-16	1.08e-14
Gh_A05G1720	429.957	1.0976	0.197071	5.56956	2.55e-08	3.75e-07
Gh_A08G2509	1681.14	1.09702	0.172562	6.35722	2.05e-10	4.08e-09
Gh_D01G1679	890.704	1.09659	0.336615	3.25771	0.00112315	0.00580105
Gh_A07G1543	1122.05	1.0962	0.17803	6.15738	7.4e-10	1.37e-08
Gh_A11G0572	271.053	1.0961	0.187142	5.85705	4.71e-09	7.73e-08
Gh_A06G1013	1808.04	1.09542	0.107921	10.1502	3.31e-24	2.39e-22
Gh_A07G0057	36.6495	1.09508	0.36769	2.97827	0.00289879	0.0130033
Gh_D04G1483	36.041	1.09502	0.386923	2.83007	0.00465381	0.0193279
Gh_A02G1635	967.889	1.09478	0.244792	4.47229	7.74e-06	7.14e-05
Gh_A04G0782	73.79	1.09477	0.388926	2.81487	0.00487972	0.0200899
Gh_A08G2483	724.144	1.09453	0.19326	5.6635	1.48e-08	2.28e-07
Gh_D11G1317	260.215	1.09441	0.173778	6.29774	3.02e-10	5.87e-09
Gh_D04G0983	96.2639	1.09438	0.25305	4.32476	1.53e-05	0.000132015
Gh_D09G2320	337.232	1.09402	0.348823	3.13632	0.00171083	0.00830792
Gh_D05G0248	352.08	1.09368	0.270235	4.04713	5.19e-05	0.000394506
Gh_D05G3887	1502.03	1.09336	0.087892	12.4398	1.59e-35	2.13e-33
Gh_D01G0588	488.605	1.09243	0.13378	8.16586	3.19e-16	1.28e-14
Gh_A10G0256	79.308	1.09238	0.308981	3.53542	0.000407124	0.00243178
Gh_A03G0460	58.8917	1.09166	0.339233	3.21804	0.00129072	0.00653849
Gh_A07G1337	1301.1	1.09131	0.173899	6.2755	3.49e-10	6.71e-09
Gh_D08G1425	222.364	1.09124	0.209104	5.21866	1.8e-07	2.3e-06
Gh_D07G2358	114.316	1.09048	0.313318	3.48043	0.000500617	0.00290566
Gh_D01G0620	14.8821	1.09025	0.446067	2.44415	0.0145195	0.0492719
Gh_A08G2440	675.618	1.08911	0.109847	9.91482	3.59e-23	2.42e-21
Gh_D12G1934	70.7193	1.08878	0.303912	3.58254	0.000340268	0.00207648
Gh_D10G1830	35.6427	1.08822	0.314048	3.46514	0.000529959	0.00305016
Gh_A01G1743	97.2358	1.0882	0.265074	4.10528	4.04e-05	0.00031601
Gh_A11G2345	2813.68	1.08809	0.133335	8.16052	3.34e-16	1.33e-14
Gh_D11G2521	100.333	1.08763	0.290918	3.73862	0.000185032	0.0012205
Gh_A06G1049	133.776	1.0876	0.195786	5.55504	2.78e-08	4.06e-07
Gh_A07G0276	90.7544	1.08724	0.275015	3.95338	7.71e-05	0.000563207
Gh_A08G0027	186.686	1.08713	0.18448	5.89298	3.79e-09	6.3e-08
Gh_A09G1587	139.755	1.08699	0.230054	4.72494	2.3e-06	2.38e-05
Gh_D12G1596	770.422	1.08688	0.166771	6.5172	7.16e-11	1.51e-09
Gh_D08G1034	52.3626	1.08686	0.445792	2.43805	0.0147667	0.0499331
Gh_A07G0435	26.8074	1.08648	0.371591	2.92386	0.00345718	0.0150799
Gh_A04G0577	59.1853	1.08647	0.308492	3.52188	0.000428496	0.00254379
Gh_A05G2660	859.341	1.08647	0.159121	6.82795	8.61e-12	2.07e-10
Gh_A07G0272	171.211	1.08623	0.182866	5.94002	2.85e-09	4.81e-08
Gh_D06G0640	952.633	1.08613	0.217051	5.00401	5.61e-07	6.52e-06
Gh_D08G0024	581.358	1.0859	0.303534	3.57752	0.000346876	0.00211172
Gh_A11G1459	9288.74	1.08571	0.150928	7.19353	6.31e-13	1.75e-11
Gh_D09G1705	199.022	1.0856	0.352409	3.08051	0.00206643	0.0097536
Gh_A04G1171	14.2188	1.08529	0.425741	2.54919	0.0107975	0.0387766
Gh_A01G1480	82.4448	1.08473	0.42949	2.52563	0.0115492	0.0409713
Gh_D03G0069	1109.79	1.08471	0.249788	4.34252	1.41e-05	0.000122531
Gh_D13G1517	725.574	1.08463	0.142462	7.61347	2.67e-14	8.68e-13
Gh_D13G0015	49.6114	1.08462	0.43625	2.48622	0.0129107	0.0448302
Gh_A05G0469	120.278	1.08428	0.323414	3.35259	0.000800579	0.00435205
Gh_A05G3833	193.234	1.08403	0.196596	5.51398	3.51e-08	5.03e-07
Gh_A06G1572	98.7305	1.08398	0.21647	5.00752	5.51e-07	6.42e-06
Gh_D06G2345	947.096	1.08348	0.168579	6.42711	1.3e-10	2.66e-09
Gh_D01G1847	58.1018	1.08327	0.308879	3.50709	0.000453029	0.0026696
Gh_A05G1986	289.505	1.08318	0.175257	6.18051	6.39e-10	1.19e-08
Gh_D01G1224	109.687	1.08286	0.221584	4.88691	1.02e-06	1.14e-05
Gh_A02G0964	197.358	1.08279	0.228948	4.7294	2.25e-06	2.34e-05
Gh_D10G0628	603.563	1.08269	0.213824	5.06347	4.12e-07	4.9e-06
Gh_D05G3921	559.856	1.08239	0.303222	3.56962	0.000357496	0.00216777
Gh_D13G1884	5425.42	1.08222	0.162215	6.67154	2.53e-11	5.67e-10
Gh_A12G0978	35.6872	1.08218	0.409626	2.64188	0.00824476	0.0310695
Gh_A12G0982	595.893	1.08216	0.18071	5.98836	2.12e-09	3.66e-08
Gh_D08G1766	119.626	1.08195	0.245849	4.40086	1.08e-05	9.63e-05
Gh_A02G0789	237.021	1.08178	0.195471	5.5342	3.13e-08	4.52e-07
Gh_A09G0371	268.734	1.08131	0.211932	5.10214	3.36e-07	4.07e-06
Gh_D10G1050	1758.37	1.08127	0.12826	8.43032	3.45e-17	1.5e-15
Gh_A05G3168	20.451	1.08124	0.418212	2.58538	0.00972728	0.0355731
Gh_A05G2882	64.0656	1.08102	0.278771	3.87781	0.000105399	0.000741992
Gh_D10G0685	108.498	1.08088	0.275975	3.91661	8.98e-05	0.000645215
Gh_D02G1820	56.2459	1.08083	0.386574	2.79593	0.00517499	0.0211001
Gh_D05G1463	122.309	1.08033	0.357208	3.02437	0.00249148	0.0114367
Gh_A05G2628	1123.8	1.08009	0.143053	7.55032	4.34e-14	1.38e-12
Gh_D11G2659	2361.9	1.08003	0.137578	7.8503	4.15e-15	1.47e-13
Gh_A13G2116	62.4585	1.0794	0.254078	4.24832	2.15e-05	0.000180428
Gh_A05G3952	173.469	1.07932	0.188548	5.72437	1.04e-08	1.62e-07
Gh_D08G2329	45.9471	1.0792	0.332168	3.24895	0.00115833	0.00595898
Gh_A08G2430	116.384	1.07916	0.229273	4.70687	2.52e-06	2.58e-05
Gh_Sca007624G08	75.699	1.07894	0.357111	3.02132	0.00251678	0.0115301
Gh_A03G0396	1398.88	1.07891	0.366759	2.94173	0.00326384	0.0143682
Gh_D13G0441	421.989	1.0789	0.25468	4.23628	2.27e-05	0.000189371
Gh_A07G0467	18.9624	1.07836	0.406828	2.65065	0.00803369	0.0304097
Gh_D05G0803	1491.37	1.07823	0.130874	8.23869	1.74e-16	7.15e-15
Gh_A08G1996	74.4308	1.07751	0.28141	3.82896	0.000128686	0.000887707
Gh_A03G0459	1162.94	1.07736	0.107866	9.98803	1.72e-23	1.19e-21
Gh_D07G1532	1015.26	1.07732	0.137778	7.81923	5.31e-15	1.87e-13
Gh_D11G3353	162.51	1.07727	0.218368	4.93327	8.09e-07	9.14e-06
Gh_A03G0079	85.9655	1.07685	0.281802	3.82129	0.000132753	0.000912525
Gh_A13G0469	183.726	1.07668	0.209527	5.1386	2.77e-07	3.42e-06
Gh_A13G0644	80.4349	1.07623	0.283398	3.79758	0.000146116	0.000992673
Gh_A12G2317	178.198	1.07601	0.195142	5.51399	3.51e-08	5.03e-07
Gh_D12G0593	398.25	1.07584	0.261593	4.11266	3.91e-05	0.000307261
Gh_D03G1080	959.377	1.0757	0.113797	9.45277	3.3e-21	1.97e-19
Gh_A10G1852	67.6598	1.07564	0.415959	2.58592	0.00971196	0.035526
Gh_A04G0432	53.9349	1.07544	0.335157	3.20877	0.00133305	0.00671406
Gh_Sca086990G01	19.4771	1.07543	0.428226	2.51136	0.0120267	0.0423429
Gh_A08G0433	307.813	1.07512	0.254684	4.22139	2.43e-05	0.000200656
Gh_D05G2522	591.478	1.07434	0.132963	8.07999	6.48e-16	2.5e-14
Gh_A10G2121	328.061	1.07428	0.15073	7.12718	1.02e-12	2.77e-11
Gh_D05G2871	661.877	1.07424	0.342601	3.13553	0.00171542	0.00832739
Gh_D11G2289	1990.43	1.07414	0.114355	9.393	5.83e-21	3.44e-19
Gh_D01G0189	40.9842	1.07393	0.395316	2.71664	0.00659488	0.0258063
Gh_D01G0676	3691.22	1.07377	0.124963	8.5927	8.5e-18	3.92e-16
Gh_A04G0701	62.4036	1.07362	0.275077	3.90296	9.5e-05	0.000678026
Gh_D10G2645	62.3803	1.0731	0.379181	2.83004	0.00465417	0.0193279
Gh_A11G2213	50.8152	1.07294	0.287316	3.73435	0.000188204	0.00123918
Gh_A05G1155	462.057	1.07273	0.422113	2.54133	0.0110431	0.0395126
Gh_D10G0935	33.9659	1.07238	0.338896	3.16435	0.00155431	0.00766339
Gh_D09G0238	565.184	1.0723	0.27614	3.88318	0.000103099	0.000727733
Gh_A08G1197	32.3321	1.07197	0.387994	2.76285	0.00572998	0.0229708
Gh_A09G0152	280.696	1.07186	0.438689	2.44331	0.0145531	0.0493659
Gh_A06G0514	1060.11	1.07141	0.123173	8.69842	3.37e-18	1.61e-16
Gh_A09G1096	28.5414	1.07127	0.369703	2.89764	0.00375978	0.0161771
Gh_D08G1148	29.4084	1.07095	0.416249	2.57285	0.0100864	0.0366523
Gh_Sca051550G01	31.703	1.07077	0.377515	2.83638	0.00456288	0.0190246
Gh_D13G0816	43.6143	1.07064	0.389358	2.74975	0.00596415	0.0237397
Gh_A01G0289	503.595	1.07038	0.150884	7.09407	1.3e-12	3.48e-11
Gh_D13G1106	138.237	1.06998	0.199026	5.37607	7.61e-08	1.04e-06
Gh_Sca074481G01	205.923	1.06944	0.236756	4.51707	6.27e-06	5.89e-05
Gh_D10G1678	1716.59	1.069	0.140504	7.60828	2.78e-14	9.01e-13
Gh_D04G0082	178.273	1.06889	0.165614	6.45412	1.09e-10	2.25e-09
Gh_D12G1614	29.557	1.06866	0.349677	3.05613	0.00224217	0.0104595
Gh_A07G1100	748.008	1.06827	0.151119	7.06909	1.56e-12	4.13e-11
Gh_D13G0238	754.32	1.06822	0.145279	7.35288	1.94e-13	5.8e-12
Gh_A09G0156	99.8012	1.06805	0.24062	4.43874	9.05e-06	8.23e-05
Gh_D13G2173	110.618	1.06797	0.356193	2.99828	0.00271506	0.0122926
Gh_D04G0395	459.108	1.06791	0.233268	4.57802	4.69e-06	4.55e-05
Gh_A07G1411	418.74	1.06719	0.126773	8.41813	3.83e-17	1.66e-15
Gh_D13G0681	89.0467	1.06707	0.345954	3.08443	0.00203943	0.0096457
Gh_A08G0227	119.807	1.06707	0.243822	4.37643	1.21e-05	0.000106527
Gh_D12G0097	85.5674	1.06704	0.358765	2.97421	0.00293748	0.0131495
Gh_A07G0245	2638.28	1.0665	0.109526	9.73746	2.09e-22	1.35e-20
Gh_A08G0722	469.625	1.06628	0.132476	8.04882	8.36e-16	3.19e-14
Gh_D09G0398	23.0959	1.06623	0.374208	2.8493	0.00438162	0.0183846
[truncated: 3,495 more rows]

## Sheet: 30min
	baseMean	log2FoldChange	lfcSE	stat	pvalue	padj
Gh_A10G2120	235.699	6.18577	0.360523	17.1578	5.5e-66	1.37e-63
Gh_A03G0420	12421.2	6.15847	0.187128	32.9105	1.56e-237	1.85e-233
Gh_D03G1125	11704.5	5.66664	0.160986	35.1995	2.03e-271	4.04e-267
Gh_A03G0405	9960	5.63227	0.201732	27.9195	1.55e-171	7.67e-168
Gh_D03G1171	190.77	5.60786	0.356174	15.7447	7.47e-56	1.32e-53
Gh_D06G0147	329.032	5.52607	0.332118	16.6389	3.64e-62	8.19e-60
Gh_D03G1135	7303.45	5.38518	0.219204	24.567	2.85e-133	5.65e-130
Gh_D01G0592	17887.5	5.3394	0.209512	25.4849	2.9e-143	7.85e-140
Gh_A11G0589	9272.33	5.20249	0.377662	13.7755	3.58e-43	4.09e-41
Gh_D05G1029	711.507	5.14275	0.247395	20.7876	5.6e-96	4.17e-93
Gh_A11G1370	1358.3	5.02333	0.172727	29.0824	5.99e-186	3.96e-182
Gh_D10G2441	143.663	5.00252	0.362273	13.8087	2.26e-43	2.61e-41
Gh_A05G0944	527.784	4.85244	0.249026	19.4857	1.45e-84	7.27e-82
Gh_A01G0581	11189	4.72095	0.133661	35.3203	2.87e-273	8.53e-269
Gh_D01G0143	221.436	4.6715	0.364945	12.8006	1.63e-37	1.45e-35
Gh_D09G0035	3023.39	4.61478	0.340091	13.5692	6.09e-42	6.72e-40
Gh_A05G3111	297.588	4.56911	0.25563	17.8739	1.88e-71	5.81e-69
Gh_D09G0277	1039.59	4.54199	0.220075	20.6384	1.24e-94	9.01e-92
Gh_A10G2119	185.309	4.50309	0.412016	10.9294	8.34e-28	4.53e-26
Gh_A06G1853	376.458	4.4459	0.336146	13.2261	6.2e-40	6.2e-38
Gh_D11G1518	1607.94	4.44517	0.162119	27.4192	1.62e-165	6.42e-162
Gh_D11G0676	4098.12	4.38983	0.409419	10.7221	8.02e-27	4.09e-25
Gh_A03G1059	524.231	4.32421	0.321178	13.4636	2.56e-41	2.71e-39
Gh_A03G2087	91.3548	4.28861	0.3435	12.4851	9.01e-36	7.49e-34
Gh_A05G2921	235.552	4.27627	0.32022	13.3542	1.12e-40	1.17e-38
Gh_A10G1536	2247.15	4.17888	0.163657	25.5344	8.19e-144	2.32e-140
Gh_D07G0984	415.939	4.17024	0.246114	16.9444	2.12e-64	5.04e-62
Gh_A10G0688	207.66	4.16409	0.281044	14.8165	1.15e-49	1.69e-47
Gh_A02G1200	2676.47	4.13675	0.211536	19.5558	3.68e-85	1.92e-82
Gh_A06G1442	186.118	4.11332	0.251319	16.367	3.29e-60	6.88e-58
Gh_D06G1179	842.12	4.06835	0.147358	27.6085	8.79e-168	3.74e-164
Gh_A12G1695	415.179	4.02721	0.428011	9.40913	5e-21	1.71e-19
Gh_D01G1032	37.9858	3.97744	0.451186	8.81554	1.19e-18	3.4e-17
Gh_D06G2358	106.902	3.97209	0.297662	13.3443	1.28e-40	1.32e-38
Gh_D10G0370	1157.86	3.95471	0.181004	21.8488	7.98e-106	8.8e-103
Gh_D12G1857	1017.7	3.91586	0.324655	12.0616	1.68e-33	1.26e-31
Gh_A09G0270	213.027	3.87743	0.379802	10.2091	1.81e-24	7.83e-23
Gh_A12G1407	766.144	3.85424	0.224888	17.1385	7.66e-66	1.88e-63
Gh_A10G0583	1627.64	3.84397	0.178247	21.5654	3.8e-103	3.53e-100
Gh_A10G0362	2189.07	3.80516	0.187963	20.2442	4e-91	2.5e-88
Gh_A06G0990	693.316	3.79719	0.175382	21.6509	5.96e-104	5.91e-101
Gh_D08G1323	442.734	3.79572	0.346154	10.9654	5.61e-28	3.07e-26
Gh_D10G2568	1641.26	3.79343	0.163723	23.1699	9.17e-119	1.44e-115
Gh_D10G0708	147.903	3.76335	0.269308	13.9742	2.24e-44	2.7e-42
Gh_D06G1658	153.029	3.69595	0.483296	7.64738	2.05e-14	4.1e-13
Gh_Sca047584G01	373.856	3.69181	0.229975	16.0531	5.44e-58	1.04e-55
Gh_A10G1606	73.8259	3.66498	0.396619	9.24056	2.45e-20	7.99e-19
Gh_D12G0215	30.3783	3.65922	0.438529	8.34431	7.16e-17	1.78e-15
Gh_D09G0271	192.488	3.6262	0.315338	11.4994	1.33e-30	8.46e-29
Gh_D05G1137	342.872	3.61786	0.246446	14.6801	8.64e-49	1.25e-46
Gh_D05G3188	29.7557	3.5732	0.407697	8.76436	1.88e-18	5.3e-17
Gh_D10G1930	1212.45	3.55151	0.190146	18.6778	7.51e-78	2.83e-75
Gh_A06G1545	920.537	3.55112	0.272072	13.0522	6.18e-39	5.93e-37
Gh_D05G1942	110.135	3.53644	0.368001	9.60986	7.26e-22	2.62e-20
Gh_D02G0075	2402.84	3.53365	0.158112	22.349	1.24e-110	1.59e-107
Gh_D09G1535	1053.8	3.50028	0.196768	17.7889	8.62e-71	2.57e-68
Gh_A07G1092	15.9419	3.45091	0.496377	6.9522	3.6e-12	5.73e-11
Gh_D08G2193	1105.55	3.43401	0.166623	20.6094	2.26e-94	1.62e-91
Gh_D04G0852	73.5526	3.43007	0.31529	10.8791	1.45e-27	7.75e-26
Gh_D02G1690	457.951	3.42587	0.306161	11.1898	4.58e-29	2.66e-27
Gh_D05G1190	916.246	3.41572	0.212442	16.0784	3.62e-58	6.97e-56
Gh_D10G0367	48.0742	3.40383	0.405718	8.38965	4.88e-17	1.23e-15
Gh_D07G0867	736.425	3.36358	0.191987	17.5198	1.01e-68	2.7e-66
Gh_A07G1080	142.908	3.34584	0.313731	10.6647	1.49e-26	7.43e-25
Gh_D07G1192	18.6538	3.31451	0.477818	6.93676	4.01e-12	6.35e-11
Gh_A07G0910	294.566	3.29448	0.227249	14.4972	1.26e-47	1.72e-45
Gh_A12G2096	968.446	3.29435	0.195889	16.8174	1.82e-63	4.25e-61
Gh_A09G0276	110.482	3.29357	0.300775	10.9503	6.63e-28	3.61e-26
Gh_D05G3432	150.158	3.26647	0.272838	11.9722	4.97e-33	3.63e-31
Gh_A07G1227	132.905	3.26389	0.31925	10.2236	1.55e-24	6.77e-23
Gh_A11G2550	655.542	3.26295	0.197309	16.5373	1.98e-61	4.3e-59
Gh_A07G0806	878.843	3.24188	0.157514	20.5816	4.01e-94	2.81e-91
Gh_D04G0395	459.108	3.23537	0.23367	13.8459	1.35e-43	1.58e-41
Gh_A05G1318	56.2867	3.22211	0.344793	9.34505	9.18e-21	3.09e-19
Gh_D10G1861	486.205	3.21599	0.309625	10.3867	2.85e-25	1.32e-23
Gh_D06G0999	641.344	3.17428	0.196669	16.1402	1.33e-58	2.61e-56
Gh_D05G3327	273.943	3.15455	0.216741	14.5544	5.47e-48	7.59e-46
Gh_Sca005103G02	1159.14	3.15442	0.22262	14.1695	1.41e-45	1.8e-43
Gh_A09G1952	10.2541	3.15377	0.527332	5.98062	2.22e-09	2.53e-08
Gh_D10G0568	791.969	3.15207	0.190229	16.5699	1.15e-61	2.54e-59
Gh_D02G1469	121.475	3.13957	0.361033	8.69609	3.44e-18	9.49e-17
Gh_D11G0764	724.945	3.13703	0.224197	13.9923	1.74e-44	2.11e-42
Gh_A10G0359	72.4423	3.1326	0.369066	8.4879	2.1e-17	5.47e-16
Gh_D13G2354	123.264	3.12423	0.262105	11.9198	9.34e-33	6.7e-31
Gh_A09G0036	1279.5	3.12311	0.39266	7.95371	1.81e-15	3.98e-14
Gh_A11G2030	559.554	3.08533	0.259629	11.8836	1.44e-32	1.02e-30
Gh_D13G0785	53.1872	3.07428	0.404339	7.60322	2.89e-14	5.67e-13
Gh_A06G1267	99.3705	3.0737	0.276846	11.1026	1.22e-28	6.95e-27
Gh_D01G1297	38.1937	3.06135	0.428151	7.15017	8.67e-13	1.46e-11
Gh_A08G0451	276.645	3.06	0.254395	12.0286	2.52e-33	1.86e-31
Gh_A02G0152	80.6362	3.05184	0.337583	9.04028	1.56e-19	4.79e-18
Gh_A09G1400	6585.72	3.0499	0.218586	13.9528	3.02e-44	3.61e-42
Gh_A08G2181	476.177	3.04162	0.223498	13.6091	3.53e-42	3.95e-40
Gh_D06G1595	109.066	3.02716	0.27031	11.1988	4.13e-29	2.42e-27
Gh_A07G0401	12.4613	3.01213	0.524095	5.7473	9.07e-09	9.5e-08
Gh_D07G1178	176.934	3.01047	0.296716	10.146	3.45e-24	1.47e-22
Gh_A05G1096	66.1774	2.99967	0.416736	7.19802	6.11e-13	1.05e-11
Gh_A10G1673	823.665	2.99906	0.220436	13.6051	3.73e-42	4.15e-40
Gh_A10G2004	203.89	2.99871	0.227763	13.166	1.38e-39	1.37e-37
Gh_D05G3110	469.544	2.99316	0.169173	17.6929	4.75e-70	1.33e-67
Gh_D08G1584	134.485	2.99032	0.271007	11.0341	2.62e-28	1.47e-26
Gh_D07G1645	255.032	2.98722	0.207726	14.3805	6.85e-47	9.07e-45
Gh_A03G0904	19.305	2.981	0.48441	6.15388	7.56e-10	9.12e-09
Gh_D10G2311	98.1362	2.97678	0.277034	10.7452	6.24e-27	3.22e-25
Gh_D03G1484	73.0203	2.97624	0.452469	6.57777	4.78e-11	6.62e-10
Gh_D12G1347	96.1231	2.96874	0.349799	8.48701	2.12e-17	5.51e-16
Gh_D07G1332	59.4479	2.96705	0.399809	7.42118	1.16e-13	2.16e-12
Gh_A05G3606	66.2381	2.96593	0.28593	10.3729	3.29e-25	1.52e-23
Gh_A02G0419	181.532	2.96263	0.232745	12.7291	4.08e-37	3.55e-35
Gh_D01G0200	580.704	2.95277	0.184459	16.0077	1.13e-57	2.14e-55
Gh_A12G1912	377.209	2.94653	0.193727	15.2097	3.05e-52	4.75e-50
Gh_D10G0335	89.5993	2.94518	0.341579	8.62224	6.57e-18	1.77e-16
Gh_A08G0317	115.587	2.94004	0.330809	8.88743	6.25e-19	1.83e-17
Gh_D05G3811	266.63	2.93781	0.242368	12.1213	8.15e-34	6.18e-32
Gh_A05G1666	17.2626	2.93465	0.460473	6.37312	1.85e-10	2.41e-09
Gh_A05G0684	144.52	2.93463	0.484721	6.05426	1.41e-09	1.65e-08
Gh_D04G0069	498.124	2.92451	0.182626	16.0136	1.03e-57	1.95e-55
Gh_A05G2224	1028.61	2.91501	0.252697	11.5356	8.73e-31	5.61e-29
Gh_A06G1269	43623	2.91369	0.300775	9.68728	3.42e-22	1.26e-20
Gh_Sca055190G01	101.845	2.90307	0.367771	7.89369	2.93e-15	6.35e-14
Gh_D12G2092	362.606	2.89659	0.163388	17.7283	2.53e-70	7.15e-68
Gh_A13G0671	30.3324	2.89168	0.450535	6.41831	1.38e-10	1.81e-09
Gh_D05G0830	31.8455	2.88611	0.506396	5.69931	1.2e-08	1.24e-07
Gh_Sca016044G01	515.6	2.88558	0.272733	10.5802	3.68e-26	1.8e-24
Gh_D06G0035	3071.43	2.87806	0.229818	12.5232	5.58e-36	4.67e-34
Gh_D05G0911	60.2633	2.87716	0.341694	8.4203	3.76e-17	9.57e-16
Gh_A13G1959	145.596	2.87216	0.257748	11.1433	7.72e-29	4.44e-27
Gh_A02G0063	1443.8	2.86543	0.116297	24.6388	4.85e-134	1.03e-130
Gh_D06G1195	75.0767	2.86329	0.324755	8.81679	1.18e-18	3.37e-17
Gh_D05G2484	1512.52	2.86076	0.229805	12.4487	1.42e-35	1.17e-33
Gh_A11G0632	30.2846	2.85778	0.381056	7.49962	6.4e-14	1.22e-12
Gh_A02G0259	77.3694	2.84581	0.414949	6.85822	6.97e-12	1.08e-10
Gh_A06G0058	1820.31	2.84557	0.284204	10.0124	1.34e-23	5.48e-22
Gh_Sca033040G01	35.6643	2.84052	0.531785	5.34149	9.22e-08	8.41e-07
Gh_D08G1934	582.523	2.8398	0.145776	19.4806	1.6e-84	7.96e-82
Gh_D05G0504	277.732	2.83963	0.172178	16.4924	4.16e-61	8.87e-59
Gh_A05G1052	99.5292	2.83625	0.323956	8.75504	2.04e-18	5.73e-17
Gh_D01G2081	59.0727	2.83615	0.30651	9.25304	2.18e-20	7.12e-19
Gh_A05G0130	148.55	2.82989	0.535607	5.28353	1.27e-07	1.13e-06
Gh_A10G0527	591.036	2.81909	0.208562	13.5167	1.25e-41	1.36e-39
Gh_A09G0151	303.883	2.81907	0.460286	6.12462	9.09e-10	1.09e-08
Gh_D10G2113	99.3049	2.81726	0.306096	9.20384	3.45e-20	1.11e-18
Gh_D06G2176	1067.82	2.81636	0.343829	8.19116	2.59e-16	6.13e-15
Gh_D04G1066	326.115	2.81354	0.194234	14.4853	1.5e-47	2.03e-45
Gh_D09G1404	7876.34	2.80433	0.190726	14.7034	6.13e-49	8.92e-47
Gh_D01G1753	343.196	2.80314	0.330465	8.4824	2.21e-17	5.73e-16
Gh_A10G2338	112.66	2.79872	0.261692	10.6947	1.08e-26	5.42e-25
Gh_D05G0486	196.64	2.79744	0.237248	11.7912	4.33e-32	2.99e-30
Gh_D09G0024	228.592	2.79273	0.174722	15.9838	1.66e-57	3.11e-55
Gh_A07G1228	17.9539	2.78549	0.506166	5.50311	3.73e-08	3.6e-07
Gh_D05G2906	229.265	2.78319	0.347265	8.01461	1.1e-15	2.48e-14
Gh_Sca076743G01	33.3149	2.77477	0.415115	6.68434	2.32e-11	3.36e-10
Gh_A07G2025	1237.35	2.77361	0.167952	16.5143	2.89e-61	6.22e-59
Gh_A13G0691	109.622	2.76709	0.301489	9.17806	4.39e-20	1.4e-18
Gh_A09G0988	148.882	2.76569	0.265502	10.4168	2.08e-25	9.7e-24
Gh_A06G0089	17.5319	2.76553	0.472614	5.85156	4.87e-09	5.29e-08
Gh_A06G1329	80.6937	2.75817	0.483711	5.70211	1.18e-08	1.22e-07
Gh_A11G1329	54.5027	2.75061	0.353627	7.77827	7.35e-15	1.53e-13
Gh_D01G2233	232.774	2.74746	0.194256	14.1435	2.05e-45	2.59e-43
Gh_D07G1331	248.6	2.74686	0.232824	11.798	4e-32	2.77e-30
Gh_D12G0494	45.4677	2.73898	0.312791	8.75657	2.01e-18	5.66e-17
Gh_D07G1887	56.8827	2.73571	0.323588	8.4543	2.81e-17	7.24e-16
Gh_D02G2065	29.5705	2.73153	0.404195	6.75794	1.4e-11	2.08e-10
Gh_D01G1178	59.3381	2.72996	0.331145	8.24399	1.67e-16	4.02e-15
Gh_A09G1493	49.5054	2.72868	0.355245	7.68112	1.58e-14	3.19e-13
Gh_A12G2727	46.3069	2.72577	0.331041	8.23394	1.81e-16	4.35e-15
Gh_D10G2486	27.6189	2.724	0.486092	5.60389	2.1e-08	2.09e-07
Gh_D09G0145	4785	2.72241	0.12884	21.1301	4.2e-99	3.48e-96
Gh_D08G1175	22.3564	2.7199	0.526931	5.16176	2.45e-07	2.08e-06
Gh_A03G0897	19.2061	2.71957	0.469827	5.78845	7.1e-09	7.54e-08
Gh_D03G0304	72.5272	2.71676	0.355189	7.64878	2.03e-14	4.05e-13
Gh_A05G0980	428.249	2.71653	0.209006	12.9974	1.27e-38	1.19e-36
Gh_D06G1341	172.565	2.71341	0.249915	10.8573	1.84e-27	9.77e-26
Gh_D11G1017	2246.64	2.71092	0.2065	13.1279	2.28e-39	2.23e-37
Gh_D11G3490	414.84	2.70979	0.153139	17.695	4.59e-70	1.29e-67
Gh_D03G0450	339.395	2.70647	0.217283	12.456	1.3e-35	1.07e-33
Gh_A03G0305	21.1422	2.70614	0.477496	5.66736	1.45e-08	1.48e-07
Gh_D03G0871	41.5944	2.70483	0.365331	7.40377	1.32e-13	2.44e-12
Gh_A01G1761	20.1428	2.70014	0.458076	5.89452	3.76e-09	4.14e-08
Gh_A10G1883	99.3506	2.69287	0.324943	8.2872	1.16e-16	2.84e-15
Gh_D05G3605	683.017	2.6914	0.194791	13.8169	2.02e-43	2.33e-41
Gh_A05G0004	237.509	2.68756	0.250407	10.7328	7.14e-27	3.65e-25
Gh_D12G2676	794.104	2.6858	0.223084	12.0394	2.21e-33	1.64e-31
Gh_A12G1832	95.0206	2.67974	0.288456	9.28993	1.54e-20	5.09e-19
Gh_Sca120332G01	28.8951	2.67843	0.455145	5.88478	3.99e-09	4.38e-08
Gh_A08G1216	108.73	2.67108	0.249185	10.7192	8.27e-27	4.2e-25
Gh_A10G0780	101.469	2.66975	0.305674	8.73396	2.46e-18	6.86e-17
Gh_A13G1197	740.59	2.66974	0.224933	11.869	1.71e-32	1.21e-30
Gh_D05G1864	47.3839	2.66875	0.400456	6.66429	2.66e-11	3.82e-10
Gh_A09G0153	3119.61	2.65752	0.149529	17.7726	1.15e-70	3.35e-68
Gh_Sca101707G01	32.5485	2.65631	0.401742	6.61198	3.79e-11	5.32e-10
Gh_A08G0686	190.581	2.65415	0.22183	11.9648	5.43e-33	3.95e-31
Gh_Sca005798G01	2566.82	2.6499	0.131965	20.0803	1.1e-89	6.73e-87
Gh_A13G0387	332.746	2.64964	0.322721	8.2103	2.21e-16	5.25e-15
Gh_D02G1824	56.8032	2.64457	0.376381	7.02632	2.12e-12	3.46e-11
Gh_A01G1840	59.6016	2.6405	0.341491	7.73225	1.06e-14	2.18e-13
Gh_A05G3819	23.3954	2.63977	0.527505	5.00426	5.61e-07	4.5e-06
Gh_D02G1623	79.5727	2.6347	0.297365	8.86017	7.99e-19	2.32e-17
Gh_A01G1167	63.0967	2.63466	0.339503	7.76034	8.47e-15	1.76e-13
Gh_D08G2381	40.0069	2.63336	0.421301	6.25053	4.09e-10	5.09e-09
Gh_D02G1475	59.7902	2.63298	0.301733	8.72621	2.63e-18	7.32e-17
Gh_A04G0446	72.5739	2.63212	0.353575	7.4443	9.75e-14	1.82e-12
Gh_D02G1691	598.591	2.62951	0.207339	12.6822	7.42e-37	6.43e-35
Gh_D05G1090	498.518	2.62306	0.234919	11.1658	6e-29	3.47e-27
Gh_D07G1232	54.0225	2.6214	0.313348	8.36579	5.97e-17	1.49e-15
Gh_D11G1560	44.8199	2.6182	0.344838	7.59255	3.14e-14	6.14e-13
Gh_A07G1790	20.109	2.61765	0.431341	6.06862	1.29e-09	1.52e-08
Gh_D05G0228	193.886	2.61702	0.271888	9.62536	6.25e-22	2.27e-20
Gh_D01G0519	16.2794	2.61215	0.476305	5.48419	4.15e-08	3.97e-07
Gh_A09G0026	248.516	2.60595	0.192995	13.5027	1.51e-41	1.63e-39
Gh_D06G1637	1202.96	2.60288	0.242915	10.7152	8.64e-27	4.38e-25
Gh_A11G0873	1497.82	2.59623	0.197673	13.134	2.1e-39	2.07e-37
Gh_D03G0884	53.7256	2.59341	0.3718	6.97528	3.05e-12	4.9e-11
Gh_A13G2025	91.0057	2.59302	0.310242	8.35804	6.38e-17	1.59e-15
Gh_A04G1238	159.997	2.59156	0.237569	10.9086	1.05e-27	5.67e-26
Gh_A12G0372	29.9806	2.5903	0.370268	6.99576	2.64e-12	4.26e-11
Gh_A06G1003	90.8259	2.58952	0.31585	8.19857	2.43e-16	5.78e-15
Gh_D12G1745	32.7259	2.58528	0.400433	6.45622	1.07e-10	1.43e-09
Gh_D08G2671	30.5773	2.58215	0.350082	7.37583	1.63e-13	2.99e-12
Gh_A02G0176	83.439	2.58121	0.29139	8.85827	8.13e-19	2.35e-17
Gh_D12G0885	525.098	2.57757	0.16751	15.3876	1.98e-53	3.21e-51
Gh_D01G0514	928.917	2.57443	0.367406	7.00704	2.43e-12	3.94e-11
Gh_A03G2153	13.5377	2.5732	0.518297	4.96472	6.88e-07	5.45e-06
Gh_D09G2129	59.3807	2.57125	0.310587	8.27868	1.25e-16	3.03e-15
Gh_D05G2138	895.137	2.56644	0.362497	7.07989	1.44e-12	2.39e-11
Gh_D05G0192	444.257	2.56471	0.52023	4.92995	8.23e-07	6.41e-06
Gh_A02G1415	32.9467	2.5619	0.422174	6.06836	1.29e-09	1.52e-08
Gh_A03G0601	259.924	2.55967	0.163856	15.6214	5.2e-55	8.92e-53
Gh_A08G1045	1049.68	2.55934	0.368627	6.94291	3.84e-12	6.09e-11
Gh_A07G1678	395.731	2.55194	0.203528	12.5385	4.59e-36	3.86e-34
Gh_D11G2375	571.541	2.55116	0.225012	11.3379	8.52e-30	5.19e-28
Gh_D13G0030	58.6768	2.5455	0.307343	8.28228	1.21e-16	2.95e-15
Gh_D12G1093	15.1954	2.54253	0.490258	5.18612	2.15e-07	1.84e-06
Gh_D06G0086	209.455	2.54109	0.278713	9.11721	7.71e-20	2.42e-18
Gh_D12G2308	57.9103	2.54026	0.329962	7.69866	1.37e-14	2.8e-13
Gh_D05G2403	270.414	2.53983	0.234102	10.8493	2.01e-27	1.06e-25
Gh_A01G1324	8344.35	2.53701	0.20204	12.557	3.64e-36	3.08e-34
Gh_A13G1960	3282.58	2.53371	0.295387	8.57759	9.69e-18	2.58e-16
Gh_A07G1657	129.274	2.53343	0.422776	5.99237	2.07e-09	2.37e-08
Gh_D02G0727	50.1873	2.53279	0.339116	7.46879	8.09e-14	1.53e-12
Gh_D11G0807	265.006	2.5324	0.208143	12.1666	4.68e-34	3.58e-32
Gh_D06G1342	65.7228	2.52952	0.342846	7.37799	1.61e-13	2.95e-12
Gh_D07G0247	69.1601	2.52496	0.245557	10.2826	8.44e-25	3.76e-23
Gh_A07G1493	571.866	2.5244	0.139733	18.0659	5.91e-73	1.91e-70
Gh_A06G1309	2359.28	2.52336	0.214555	11.7609	6.2e-32	4.23e-30
Gh_A11G0506	272.462	2.52137	0.178376	14.1352	2.31e-45	2.91e-43
Gh_A12G2129	91.7743	2.51876	0.269681	9.33975	9.66e-21	3.23e-19
Gh_D09G0962	34.7608	2.51858	0.387117	6.50599	7.72e-11	1.04e-09
Gh_A05G3522	6.36615	2.51372	0.513729	4.89307	9.93e-07	7.64e-06
Gh_D11G0264	2315.86	2.51362	0.261315	9.61911	6.64e-22	2.41e-20
Gh_A01G0535	23.6746	2.51156	0.498812	5.03508	4.78e-07	3.88e-06
Gh_A05G3069	19.7592	2.5082	0.509185	4.92592	8.4e-07	6.54e-06
Gh_A07G2037	240.01	2.50724	0.199828	12.547	4.13e-36	3.47e-34
Gh_D10G2153	205.443	2.50595	0.264141	9.48714	2.37e-21	8.28e-20
Gh_D02G1866	68.7188	2.50552	0.333188	7.51983	5.48e-14	1.05e-12
Gh_A01G0071	15.7725	2.50412	0.483588	5.17821	2.24e-07	1.92e-06
Gh_D13G2170	379.902	2.50409	0.207255	12.0822	1.31e-33	9.83e-32
Gh_A08G0962	26.6524	2.49907	0.530576	4.71011	2.48e-06	1.78e-05
Gh_D05G0008	254.802	2.49649	0.244032	10.2302	1.45e-24	6.34e-23
Gh_A03G0758	37.3387	2.49156	0.431566	5.77329	7.77e-09	8.22e-08
Gh_A05G3050	82.595	2.49079	0.29142	8.54709	1.26e-17	3.35e-16
Gh_A11G2415	50.0843	2.48957	0.343115	7.25578	3.99e-13	7.01e-12
Gh_A07G1132	46.8687	2.48805	0.382604	6.50294	7.88e-11	1.06e-09
Gh_A08G0543	41.443	2.48796	0.334589	7.43585	1.04e-13	1.94e-12
Gh_D10G0059	367.213	2.48547	0.251344	9.88874	4.66e-23	1.82e-21
Gh_A03G0088	136.794	2.48446	0.289486	8.58231	9.3e-18	2.48e-16
Gh_D06G0411	1986.69	2.48371	0.212411	11.6929	1.39e-31	9.28e-30
Gh_D11G3176	19.2552	2.48302	0.417855	5.94231	2.81e-09	3.15e-08
Gh_A08G2444	262.485	2.47273	0.21541	11.4792	1.68e-30	1.06e-28
Gh_A03G0587	65.7759	2.46753	0.321294	7.67999	1.59e-14	3.21e-13
Gh_A07G1093	97.7883	2.46712	0.311363	7.92364	2.31e-15	5.04e-14
Gh_A11G2902	1553.79	2.46654	0.209565	11.7698	5.58e-32	3.83e-30
Gh_A13G0839	1764.79	2.46216	0.169641	14.5139	9.89e-48	1.36e-45
Gh_A11G1206	48.0694	2.45952	0.424777	5.79013	7.03e-09	7.47e-08
Gh_D07G2005	258.474	2.45555	0.228781	10.7332	7.11e-27	3.64e-25
Gh_A05G1902	197.493	2.45336	0.447771	5.47905	4.28e-08	4.09e-07
Gh_A09G2343	21.6597	2.45279	0.418931	5.85488	4.77e-09	5.19e-08
Gh_A01G1605	2233.45	2.45176	0.260835	9.39965	5.47e-21	1.86e-19
Gh_D05G0027	42.3142	2.44889	0.387654	6.31722	2.66e-10	3.39e-09
Gh_D11G2309	630.123	2.44481	0.190903	12.8066	1.51e-37	1.34e-35
Gh_A11G0779	49.3623	2.44444	0.34159	7.15608	8.3e-13	1.41e-11
Gh_A07G0992	47.5381	2.44055	0.389176	6.27107	3.59e-10	4.49e-09
Gh_D05G2969	22.6922	2.43878	0.465217	5.24223	1.59e-07	1.39e-06
Gh_A01G1103	59.1683	2.43762	0.331091	7.36239	1.81e-13	3.29e-12
Gh_A12G1235	25.0171	2.43645	0.367603	6.62793	3.4e-11	4.8e-10
Gh_D08G1046	466.808	2.43391	0.211036	11.5332	8.98e-31	5.76e-29
Gh_D04G1954	713.434	2.43336	0.19789	12.2966	9.45e-35	7.42e-33
Gh_D08G1738	34.7218	2.43262	0.373828	6.50732	7.65e-11	1.04e-09
Gh_Sca081746G01	8590.05	2.42913	0.289425	8.39293	4.74e-17	1.2e-15
Gh_A06G1481	866.516	2.42616	0.154084	15.7457	7.35e-56	1.31e-53
Gh_A08G0371	38.5306	2.4256	0.369533	6.56397	5.24e-11	7.22e-10
Gh_A04G0116	784.286	2.42394	0.200989	12.0601	1.72e-33	1.28e-31
Gh_A13G2149	16.6806	2.42327	0.448386	5.40444	6.5e-08	6.06e-07
Gh_D12G0250	36.1608	2.42191	0.396408	6.10963	9.99e-10	1.19e-08
Gh_D03G0099	319.47	2.42082	0.194496	12.4466	1.46e-35	1.19e-33
Gh_A02G0258	158.822	2.41577	0.318187	7.59231	3.14e-14	6.15e-13
Gh_A03G1228	71.2419	2.41408	0.386738	6.24216	4.32e-10	5.35e-09
Gh_A02G0237	1593.77	2.40874	0.163817	14.7038	6.09e-49	8.89e-47
Gh_A12G1510	167.151	2.40615	0.212532	11.3213	1.03e-29	6.23e-28
Gh_A05G2146	77.3124	2.39392	0.345936	6.92012	4.51e-12	7.09e-11
Gh_D10G2618	35.4731	2.39274	0.473811	5.04999	4.42e-07	3.61e-06
Gh_A08G2306	184.362	2.39254	0.23236	10.2967	7.29e-25	3.26e-23
Gh_A04G0875	129.435	2.39241	0.221897	10.7816	4.2e-27	2.18e-25
Gh_D10G0640	621.871	2.39225	0.206785	11.5688	5.93e-31	3.85e-29
Gh_D05G0193	37.6975	2.39191	0.532924	4.48828	7.18e-06	4.74e-05
Gh_D12G2102	44.1891	2.39117	0.355156	6.73274	1.67e-11	2.45e-10
Gh_A06G0942	297.838	2.39013	0.157117	15.2124	2.93e-52	4.57e-50
Gh_A11G1304	12.2324	2.3866	0.491028	4.86041	1.17e-06	8.9e-06
Gh_D12G1765	40.7764	2.38121	0.374405	6.35998	2.02e-10	2.61e-09
Gh_A12G1734	53.0562	2.38106	0.354512	6.71643	1.86e-11	2.73e-10
Gh_D05G3805	251.99	2.37946	0.250007	9.51756	1.77e-21	6.23e-20
Gh_A01G1562	1924.27	2.3766	0.134817	17.6283	1.49e-69	4.15e-67
Gh_D07G1889	480.051	2.37485	0.199229	11.9202	9.29e-33	6.67e-31
Gh_A13G0253	766.201	2.37483	0.129909	18.2807	1.18e-74	3.94e-72
Gh_D08G0878	68.6941	2.37082	0.299823	7.9074	2.63e-15	5.72e-14
Gh_D03G0544	806.281	2.36988	0.161709	14.6552	1.25e-48	1.8e-46
Gh_A08G0315	1975.6	2.36843	0.330933	7.15684	8.26e-13	1.4e-11
Gh_A11G1412	63.975	2.36708	0.335252	7.06062	1.66e-12	2.73e-11
Gh_D02G0372	75.1981	2.3661	0.309805	7.6374	2.22e-14	4.41e-13
Gh_A12G0978	35.6872	2.36594	0.427611	5.53293	3.15e-08	3.07e-07
Gh_A09G2289	519.377	2.36344	0.212092	11.1435	7.71e-29	4.44e-27
Gh_A03G2015	125.341	2.36334	0.349328	6.76541	1.33e-11	1.98e-10
Gh_D11G2349	52.4985	2.36097	0.337497	6.99553	2.64e-12	4.27e-11
Gh_A10G0593	338.089	2.36031	0.245735	9.60512	7.61e-22	2.74e-20
Gh_D05G1800	175.656	2.35786	0.31057	7.59205	3.15e-14	6.16e-13
Gh_D12G2343	130.238	2.3559	0.246308	9.56485	1.12e-21	3.99e-20
Gh_D07G0523	1262.53	2.35483	0.230237	10.2278	1.49e-24	6.49e-23
Gh_Sca042871G01	55.6388	2.35413	0.317711	7.40964	1.27e-13	2.34e-12
Gh_D06G2353	79.5223	2.35203	0.290359	8.10043	5.48e-16	1.26e-14
Gh_A10G0706	51.564	2.35019	0.450763	5.21381	1.85e-07	1.6e-06
Gh_D08G0240	264.628	2.34745	0.244725	9.59219	8.62e-22	3.09e-20
Gh_D02G0631	177.95	2.3436	0.228932	10.2371	1.35e-24	5.93e-23
Gh_D05G3862	49.0181	2.34074	0.361195	6.48055	9.14e-11	1.23e-09
Gh_D12G1634	148.107	2.33945	0.216416	10.81	3.09e-27	1.62e-25
Gh_A08G2106	291.761	2.33619	0.31643	7.38296	1.55e-13	2.84e-12
Gh_A09G1497	114.287	2.33469	0.24298	9.60857	7.36e-22	2.65e-20
Gh_A10G1194	76.7761	2.33368	0.31008	7.52608	5.23e-14	1e-12
Gh_D02G0189	87.0112	2.33107	0.346256	6.73221	1.67e-11	2.46e-10
Gh_A06G1771	57.72	2.33035	0.394183	5.91185	3.38e-09	3.75e-08
Gh_D09G0276	20.8678	2.32805	0.43416	5.36219	8.22e-08	7.55e-07
Gh_D10G1576	32.3849	2.32583	0.361933	6.42615	1.31e-10	1.73e-09
Gh_D06G2104	55.6842	2.32398	0.372073	6.24604	4.21e-10	5.23e-09
Gh_A06G1802	790.717	2.32359	0.454072	5.11724	3.1e-07	2.6e-06
Gh_D09G0141	1031.56	2.32317	0.518845	4.47758	7.55e-06	4.96e-05
Gh_D06G1340	30.0428	2.32143	0.423828	5.4773	4.32e-08	4.12e-07
Gh_A10G0692	2624.51	2.31816	0.13043	17.7732	1.14e-70	3.33e-68
Gh_D09G0591	16.0306	2.31606	0.438486	5.28194	1.28e-07	1.14e-06
Gh_D08G1926	130.676	2.3066	0.208904	11.0414	2.41e-28	1.35e-26
Gh_A07G1676	54.5517	2.30618	0.366427	6.2937	3.1e-10	3.91e-09
Gh_A08G1292	243.582	2.30391	0.264747	8.70229	3.25e-18	8.99e-17
Gh_A09G1477	330.241	2.3035	0.175004	13.1625	1.44e-39	1.43e-37
Gh_A08G2502	137.066	2.30308	0.201382	11.4364	2.75e-30	1.72e-28
Gh_A12G2246	36.2125	2.30206	0.379148	6.07168	1.27e-09	1.49e-08
Gh_A01G1662	715.768	2.30124	0.175285	13.1286	2.26e-39	2.21e-37
Gh_D08G0298	30.4798	2.29568	0.35536	6.46015	1.05e-10	1.39e-09
Gh_A05G2284	40.048	2.2944	0.36412	6.30121	2.95e-10	3.73e-09
Gh_D06G1528	139.497	2.29304	0.253634	9.04074	1.56e-19	4.77e-18
Gh_D11G2913	838.398	2.29286	0.206071	11.1266	9.32e-29	5.33e-27
Gh_A04G0222	79.4505	2.28938	0.346344	6.61013	3.84e-11	5.38e-10
Gh_Sca004802G02	55.0362	2.28821	0.338203	6.7658	1.33e-11	1.98e-10
Gh_D04G1202	212.188	2.28439	0.303088	7.53704	4.81e-14	9.25e-13
Gh_D08G0994	10.7243	2.28364	0.523352	4.36348	1.28e-05	8.06e-05
Gh_D11G0742	44.2966	2.28278	0.359286	6.35366	2.1e-10	2.71e-09
Gh_D05G1488	55.702	2.282	0.317161	7.19509	6.24e-13	1.07e-11
Gh_D09G1487	348.27	2.28173	0.185478	12.3018	8.85e-35	6.97e-33
Gh_Sca004922G01	260.77	2.28019	0.363574	6.27159	3.57e-10	4.48e-09
Gh_A05G0798	505.085	2.27909	0.204851	11.1256	9.41e-29	5.38e-27
Gh_D12G2267	1627.66	2.27806	0.156131	14.5907	3.22e-48	4.56e-46
Gh_A11G3302	16.8796	2.27738	0.511218	4.45481	8.4e-06	5.48e-05
Gh_D01G1805	47.3502	2.27709	0.420378	5.41677	6.07e-08	5.68e-07
Gh_D01G0189	40.9842	2.27686	0.408169	5.57823	2.43e-08	2.4e-07
Gh_D08G1583	217.703	2.27307	0.233501	9.73472	2.14e-22	8.04e-21
Gh_A11G0194	14.2657	2.27212	0.496462	4.57663	4.73e-06	3.23e-05
Gh_D11G0271	58.4541	2.27131	0.447398	5.07671	3.84e-07	3.17e-06
Gh_A05G1305	300.074	2.27051	0.179994	12.6143	1.76e-36	1.51e-34
Gh_A13G0260	131.652	2.26967	0.369953	6.13503	8.51e-10	1.02e-08
Gh_A08G1494	65.3652	2.2664	0.305686	7.41416	1.22e-13	2.27e-12
Gh_D06G0902	1187.56	2.26505	0.212966	10.6357	2.03e-26	1.01e-24
Gh_A10G1973	399.992	2.265	0.18324	12.3608	4.26e-35	3.4e-33
Gh_D10G1289	6.07666	2.26457	0.519147	4.3621	1.29e-05	8.11e-05
Gh_A03G1600	41.5795	2.26136	0.405065	5.5827	2.37e-08	2.34e-07
Gh_D06G1157	660.478	2.25713	0.210889	10.7029	9.86e-27	4.98e-25
Gh_D07G1658	36.8859	2.2543	0.392845	5.7384	9.56e-09	9.98e-08
Gh_A11G0778	132.99	2.2525	0.198167	11.3667	6.13e-30	3.78e-28
Gh_A02G1042	11.6574	2.25222	0.508566	4.42857	9.49e-06	6.12e-05
Gh_A08G2171	19.4139	2.25152	0.414522	5.43162	5.58e-08	5.25e-07
Gh_D13G1594	24.8319	2.2487	0.398635	5.641	1.69e-08	1.71e-07
Gh_Sca005053G02	23.3772	2.24567	0.49173	4.56686	4.95e-06	3.37e-05
Gh_A07G2223	47.3793	2.24395	0.381117	5.88784	3.91e-09	4.3e-08
Gh_D07G0548	40.263	2.24283	0.414513	5.41076	6.28e-08	5.86e-07
Gh_A05G3538	291.677	2.24145	0.212911	10.5277	6.44e-26	3.09e-24
Gh_A06G1857	993.146	2.24075	0.168453	13.302	2.25e-40	2.31e-38
Gh_A09G0275	26.1051	2.23828	0.398471	5.61717	1.94e-08	1.94e-07
Gh_D02G2098	151.757	2.23635	0.240866	9.28462	1.62e-20	5.34e-19
Gh_A08G1621	407.662	2.23585	0.179151	12.4803	9.56e-36	7.93e-34
Gh_D07G2103	36.7852	2.23559	0.355934	6.28092	3.37e-10	4.23e-09
Gh_D08G1881	76.0684	2.23289	0.300633	7.4273	1.11e-13	2.06e-12
Gh_D09G1113	1772.23	2.23276	0.140079	15.9393	3.38e-57	6.23e-55
Gh_A10G0275	10.1235	2.23266	0.537734	4.15197	3.3e-05	0.000190807
Gh_A11G0239	2.90558	2.22973	0.531281	4.1969	2.71e-05	0.00015973
Gh_A09G1209	221.981	2.22864	0.238496	9.34459	9.23e-21	3.1e-19
Gh_A01G1507	285.56	2.22851	0.336226	6.62802	3.4e-11	4.8e-10
Gh_A07G1968	133.958	2.22843	0.240712	9.25767	2.09e-20	6.83e-19
Gh_Sca210283G01	18.1156	2.22839	0.442949	5.0308	4.88e-07	3.95e-06
Gh_D05G1475	544.219	2.22826	0.130014	17.1386	7.65e-66	1.88e-63
Gh_D05G1341	8.84814	2.22761	0.533768	4.17337	3e-05	0.000175352
Gh_A02G0680	54.9989	2.22694	0.355431	6.26548	3.72e-10	4.64e-09
Gh_D05G1630	18.4906	2.22642	0.416303	5.34806	8.89e-08	8.13e-07
Gh_A10G1052	33.6048	2.22506	0.371902	5.98293	2.19e-09	2.5e-08
Gh_D01G1811	1147.75	2.22502	0.160583	13.8559	1.17e-43	1.38e-41
Gh_D12G0180	1710.6	2.22326	0.18753	11.8555	2.02e-32	1.41e-30
Gh_A01G2049	499.617	2.2225	0.35313	6.29372	3.1e-10	3.91e-09
Gh_D02G0472	256.326	2.21966	0.223961	9.91093	3.73e-23	1.48e-21
Gh_D02G0406	7.91978	2.2183	0.538095	4.12252	3.75e-05	0.000214473
Gh_D10G1078	12.3248	2.2141	0.461369	4.79899	1.59e-06	1.19e-05
Gh_D10G2624	303.372	2.21326	0.247724	8.9344	4.09e-19	1.21e-17
Gh_D07G2239	6.65086	2.21168	0.530923	4.16573	3.1e-05	0.000180707
Gh_A08G1649	35.5378	2.21029	0.34452	6.41558	1.4e-10	1.84e-09
Gh_D08G0498	146.935	2.20951	0.234255	9.43207	4.02e-21	1.38e-19
Gh_D04G1682	114.114	2.20796	0.214219	10.307	6.55e-25	2.95e-23
Gh_D12G0048	135.895	2.20777	0.382525	5.77156	7.85e-09	8.3e-08
Gh_D10G1831	2013.05	2.20721	0.247688	8.91123	5.05e-19	1.49e-17
Gh_D13G0991	36.0117	2.20713	0.399162	5.52942	3.21e-08	3.13e-07
Gh_A06G0365	355.802	2.207	0.195515	11.2881	1.5e-29	9e-28
Gh_A11G0430	12.6163	2.20509	0.538012	4.09858	4.16e-05	0.000235767
Gh_A05G3818	26.8693	2.2019	0.484461	4.54506	5.49e-06	3.71e-05
Gh_A01G0431	1024.32	2.1998	0.189028	11.6374	2.66e-31	1.75e-29
Gh_A05G2532	53.34	2.19868	0.402385	5.46412	4.65e-08	4.41e-07
Gh_D12G1766	6.88306	2.19858	0.52536	4.18491	2.85e-05	0.000167547
Gh_D06G1215	1553.47	2.19701	0.128629	17.0803	2.08e-65	5.06e-63
Gh_D05G0917	592.43	2.19655	0.189266	11.6057	3.86e-31	2.53e-29
Gh_D08G0537	548.721	2.19617	0.17717	12.3958	2.75e-35	2.21e-33
Gh_A03G0139	52.6266	2.19452	0.346855	6.3269	2.5e-10	3.19e-09
Gh_D12G2129	105.323	2.19419	0.398379	5.50781	3.63e-08	3.51e-07
Gh_A04G0207	54.2459	2.19172	0.381819	5.74022	9.46e-09	9.88e-08
Gh_A05G0732	21.7048	2.1914	0.39792	5.50714	3.65e-08	3.52e-07
Gh_A04G0678	361.238	2.19093	0.175638	12.4742	1.03e-35	8.54e-34
Gh_A05G2087	318.107	2.19087	0.228954	9.56902	1.08e-21	3.84e-20
Gh_D04G1081	19309.4	2.1882	0.1607	13.6167	3.19e-42	3.57e-40
Gh_A09G0935	32.8488	2.18764	0.435015	5.02889	4.93e-07	3.99e-06
Gh_A12G2342	51.2948	2.18665	0.472891	4.624	3.76e-06	2.62e-05
Gh_D05G2726	57.5902	2.18473	0.35801	6.10242	1.04e-09	1.24e-08
Gh_A12G1922	60.8345	2.18331	0.286497	7.6207	2.52e-14	4.98e-13
Gh_D11G1480	70.5959	2.18316	0.322324	6.77319	1.26e-11	1.89e-10
Gh_D05G0705	598.925	2.18316	0.145853	14.9681	1.19e-50	1.79e-48
Gh_D12G2772	50.0178	2.18283	0.483062	4.51874	6.22e-06	4.15e-05
Gh_A02G0307	40.853	2.181	0.400343	5.44782	5.1e-08	4.82e-07
Gh_A07G1957	635.019	2.17957	0.192543	11.3199	1.05e-29	6.32e-28
Gh_A05G3783	179.381	2.17849	0.168894	12.8985	4.59e-38	4.18e-36
Gh_D06G0752	53.1915	2.17802	0.312091	6.97877	2.98e-12	4.79e-11
Gh_A07G1824	22.5473	2.17747	0.416884	5.22321	1.76e-07	1.53e-06
Gh_D02G2305	145.132	2.17733	0.339395	6.41531	1.41e-10	1.85e-09
Gh_A08G2422	123.857	2.17656	0.341208	6.37898	1.78e-10	2.32e-09
Gh_A09G1551	134.326	2.17549	0.248523	8.7537	2.06e-18	5.79e-17
Gh_A05G2668	57.8376	2.17474	0.326651	6.65768	2.78e-11	3.99e-10
Gh_D10G1077	113.618	2.16935	0.236945	9.15548	5.41e-20	1.72e-18
Gh_D02G1573	45.3298	2.16888	0.374853	5.78594	7.21e-09	7.65e-08
Gh_A05G2584	10.0506	2.16485	0.482741	4.4845	7.31e-06	4.82e-05
Gh_A12G0724	54.0558	2.16411	0.367698	5.88558	3.97e-09	4.36e-08
Gh_A01G1821	125.004	2.16285	0.31008	6.97513	3.06e-12	4.91e-11
Gh_D09G0212	18.9632	2.16283	0.467304	4.62832	3.69e-06	2.57e-05
Gh_D09G2244	22.1265	2.16202	0.412318	5.24356	1.58e-07	1.38e-06
Gh_D08G1792	68.2015	2.1615	0.282069	7.663	1.82e-14	3.65e-13
Gh_D01G0071	9.7399	2.16113	0.517463	4.1764	2.96e-05	0.000173289
Gh_D07G1070	7.41367	2.15954	0.515145	4.19211	2.76e-05	0.000162804
Gh_A10G1372	114.47	2.15902	0.239485	9.01528	1.96e-19	5.98e-18
Gh_D06G1725	7.53893	2.15863	0.533281	4.04783	5.17e-05	0.000287261
Gh_D11G1841	16.541	2.15525	0.435732	4.94627	7.56e-07	5.95e-06
Gh_D01G0438	859.718	2.15461	0.192001	11.2219	3.19e-29	1.88e-27
Gh_A02G1102	52.7516	2.15427	0.308722	6.97803	2.99e-12	4.81e-11
Gh_D11G0765	5312.46	2.154	0.0986583	21.8329	1.13e-105	1.22e-102
Gh_A11G1682	34.1141	2.15325	0.369264	5.83119	5.5e-09	5.94e-08
Gh_D11G0644	546.25	2.15172	0.185865	11.5768	5.4e-31	3.52e-29
Gh_D06G1981	18.0617	2.15168	0.429131	5.01404	5.33e-07	4.29e-06
Gh_D06G0644	23.2783	2.15015	0.443999	4.8427	1.28e-06	9.66e-06
Gh_Sca012173G01	774.954	2.14966	0.197923	10.8611	1.77e-27	9.39e-26
Gh_A07G1800	113.708	2.14906	0.323617	6.64077	3.12e-11	4.44e-10
Gh_D08G0322	161.097	2.14885	0.214541	10.0161	1.3e-23	5.3e-22
Gh_A08G0081	62.9079	2.14883	0.349926	6.14081	8.21e-10	9.87e-09
Gh_A05G0131	69.6927	2.14788	0.536466	4.00375	6.23e-05	0.000340785
Gh_A06G1092	208.106	2.14454	0.29527	7.26297	3.79e-13	6.66e-12
Gh_A13G1695	236.712	2.13664	0.198018	10.7901	3.83e-27	2e-25
Gh_A13G1553	3.70251	2.1341	0.534963	3.98925	6.63e-05	0.000360015
Gh_D11G2042	18.4846	2.13309	0.414626	5.14461	2.68e-07	2.27e-06
Gh_D10G0628	603.563	2.13024	0.214773	9.91855	3.46e-23	1.37e-21
Gh_A11G2216	1054.1	2.12989	0.142504	14.9462	1.65e-50	2.49e-48
Gh_D11G2799	48.275	2.1297	0.329074	6.47179	9.68e-11	1.3e-09
Gh_A05G2459	39.0121	2.12959	0.410235	5.19113	2.09e-07	1.8e-06
Gh_D13G2489	3617.88	2.12905	0.233501	9.11793	7.66e-20	2.4e-18
Gh_D08G0413	2801.16	2.1285	0.325871	6.53172	6.5e-11	8.89e-10
Gh_D06G1651	55.1896	2.12759	0.409993	5.18934	2.11e-07	1.81e-06
Gh_A01G1973	183.897	2.12553	0.211511	10.0492	9.26e-24	3.82e-22
Gh_D11G0239	29.6401	2.12553	0.39942	5.32152	1.03e-07	9.31e-07
Gh_D03G1775	134.228	2.1253	0.255676	8.31248	9.37e-17	2.31e-15
Gh_D11G0607	12.2495	2.12508	0.531319	3.99963	6.34e-05	0.000346258
Gh_A10G0473	114.496	2.1236	0.499538	4.25113	2.13e-05	0.000127965
Gh_D07G0207	34.0053	2.12142	0.412575	5.14191	2.72e-07	2.3e-06
Gh_A13G2244	32.4957	2.12033	0.390195	5.43403	5.51e-08	5.18e-07
Gh_A08G0248	15.9362	2.12032	0.491604	4.31306	1.61e-05	9.94e-05
Gh_D08G0412	2789.73	2.12026	0.325816	6.50753	7.64e-11	1.03e-09
Gh_A13G0825	160.942	2.11996	0.386612	5.48344	4.17e-08	3.99e-07
Gh_A04G0432	53.9349	2.11956	0.353841	5.99015	2.1e-09	2.39e-08
Gh_Sca044897G01	21.7301	2.11331	0.428348	4.93364	8.07e-07	6.3e-06
Gh_A09G1940	33.1455	2.11329	0.377817	5.59342	2.23e-08	2.21e-07
Gh_Sca112508G01	45.2283	2.11301	0.457336	4.62025	3.83e-06	2.67e-05
Gh_D12G2112	475.777	2.11247	0.456437	4.62817	3.69e-06	2.57e-05
Gh_A03G1250	141.359	2.11179	0.291293	7.2497	4.18e-13	7.31e-12
Gh_A01G0144	40.68	2.11037	0.39993	5.27684	1.31e-07	1.17e-06
Gh_D05G1422	8.62873	2.1083	0.507068	4.15783	3.21e-05	0.0001864
Gh_A01G1835	3.72386	2.10765	0.533149	3.95321	7.71e-05	0.000413288
Gh_A08G0314	1429.77	2.10751	0.305338	6.90222	5.12e-12	8e-11
Gh_A03G1304	90.6613	2.10743	0.274542	7.67616	1.64e-14	3.31e-13
Gh_A13G2116	62.4585	2.10394	0.290022	7.25441	4.03e-13	7.08e-12
Gh_A02G0743	17.7905	2.10158	0.424031	4.95619	7.19e-07	5.67e-06
Gh_D13G1029	442.164	2.10059	0.19971	10.5182	7.12e-26	3.41e-24
Gh_A10G0449	171.019	2.09888	0.395478	5.30719	1.11e-07	1e-06
Gh_D07G1517	214.271	2.09665	0.271192	7.73125	1.06e-14	2.19e-13
Gh_D08G0788	25.8373	2.09398	0.41265	5.07447	3.89e-07	3.21e-06
Gh_D09G0932	86.3048	2.09197	0.254183	8.23014	1.87e-16	4.48e-15
Gh_A12G1607	16.1589	2.08937	0.472758	4.41952	9.89e-06	6.36e-05
Gh_D10G2487	71.7747	2.08752	0.310572	6.72152	1.8e-11	2.64e-10
Gh_A07G0392	424.116	2.08702	0.170686	12.2272	2.22e-34	1.72e-32
Gh_D13G0763	122.208	2.08638	0.256047	8.14842	3.69e-16	8.62e-15
Gh_A13G0835	46.0205	2.08574	0.35056	5.94974	2.69e-09	3.01e-08
Gh_A09G0015	7.05311	2.08532	0.518963	4.01824	5.86e-05	0.000322334
Gh_D12G1094	50.3363	2.08276	0.358965	5.80212	6.55e-09	6.98e-08
Gh_D04G1552	96.0269	2.08214	0.259156	8.03429	9.41e-16	2.13e-14
Gh_D05G1176	41.4974	2.08083	0.365821	5.68811	1.28e-08	1.32e-07
Gh_D10G1677	40.1905	2.08029	0.343862	6.04979	1.45e-09	1.69e-08
Gh_A11G0303	674.668	2.07977	0.167637	12.4064	2.41e-35	1.94e-33
Gh_Sca008153G01	100.435	2.07854	0.249944	8.31606	9.09e-17	2.24e-15
Gh_D07G0885	631.912	2.07804	0.150113	13.8432	1.4e-43	1.64e-41
Gh_D11G2732	22.8943	2.07673	0.448597	4.62939	3.67e-06	2.56e-05
Gh_A10G0965	30.5648	2.07673	0.392479	5.29132	1.21e-07	1.09e-06
Gh_D08G1333	34.7239	2.07577	0.458937	4.52299	6.1e-06	4.08e-05
Gh_D09G2132	58.0796	2.07278	0.36068	5.74687	9.09e-09	9.53e-08
Gh_D09G0961	58.1424	2.07232	0.322479	6.42623	1.31e-10	1.73e-09
Gh_D12G2529	129.028	2.07173	0.207357	9.99114	1.67e-23	6.75e-22
Gh_D04G0855	2650.37	2.07129	0.153922	13.4568	2.81e-41	2.97e-39
Gh_D07G0797	331.886	2.07075	0.245867	8.42224	3.69e-17	9.42e-16
Gh_A09G2258	222.672	2.06963	0.255806	8.09063	5.94e-16	1.36e-14
Gh_D10G1976	168.377	2.06922	0.320198	6.46231	1.03e-10	1.38e-09
Gh_D08G0648	138.668	2.06816	0.230561	8.97014	2.96e-19	8.88e-18
Gh_D11G0265	21.8523	2.06726	0.459776	4.49624	6.92e-06	4.58e-05
Gh_D08G0800	177.367	2.0666	0.255878	8.07649	6.67e-16	1.52e-14
Gh_A10G1852	67.6598	2.06389	0.364329	5.66492	1.47e-08	1.5e-07
Gh_D13G2087	5.46458	2.05938	0.525508	3.91883	8.9e-05	0.000471004
Gh_D11G0842	370.037	2.05869	0.250313	8.22448	1.96e-16	4.69e-15
Gh_A05G1019	121.701	2.05758	0.295623	6.96017	3.4e-12	5.44e-11
Gh_D01G1541	6968.5	2.05609	0.158191	12.9975	1.26e-38	1.19e-36
Gh_D07G0465	44.7113	2.05558	0.434389	4.73213	2.22e-06	1.61e-05
Gh_A07G0616	1516.25	2.05445	0.156084	13.1625	1.44e-39	1.43e-37
Gh_A01G0157	238.446	2.05369	0.189698	10.8261	2.59e-27	1.36e-25
Gh_A06G0526	118.995	2.05264	0.231317	8.87373	7.07e-19	2.06e-17
Gh_D05G1248	90.4224	2.05018	0.243221	8.42928	3.48e-17	8.89e-16
Gh_D02G0328	6.45822	2.04865	0.536965	3.81523	0.000136054	0.000692544
Gh_D05G1240	5.75575	2.04837	0.5175	3.95821	7.55e-05	0.000405573
Gh_D09G0408	36.1917	2.0479	0.406871	5.03329	4.82e-07	3.91e-06
Gh_D03G0057	225.046	2.04763	0.231571	8.84235	9.37e-19	2.7e-17
Gh_A05G1012	210.181	2.0475	0.249263	8.21423	2.14e-16	5.09e-15
Gh_D12G1070	79.9954	2.04557	0.314238	6.5096	7.54e-11	1.02e-09
Gh_A12G0179	2125.9	2.04415	0.151292	13.5113	1.34e-41	1.46e-39
Gh_D13G1441	129.735	2.04375	0.252512	8.09368	5.79e-16	1.33e-14
Gh_A11G3233	105.409	2.04366	0.284325	7.18778	6.59e-13	1.13e-11
Gh_D02G1910	49.8805	2.04147	0.307371	6.64171	3.1e-11	4.41e-10
Gh_D01G0342	445.129	2.0406	0.202581	10.073	7.27e-24	3.03e-22
Gh_A01G1221	172.694	2.04052	0.317617	6.42447	1.32e-10	1.74e-09
Gh_A07G1351	587.921	2.04027	0.21579	9.45489	3.23e-21	1.11e-19
Gh_A08G0407	117.909	2.03988	0.256228	7.96121	1.7e-15	3.76e-14
Gh_D10G0952	525.994	2.03951	0.209673	9.72709	2.31e-22	8.63e-21
Gh_A08G0960	41.2484	2.03931	0.472434	4.3166	1.58e-05	9.8e-05
Gh_D12G0534	4.29898	2.03896	0.535385	3.8084	0.000139872	0.000710337
Gh_Sca010496G01	33.0157	2.03775	0.375634	5.42484	5.8e-08	5.43e-07
Gh_A05G0860	79.047	2.03774	0.339831	5.99632	2.02e-09	2.31e-08
Gh_D12G0989	969.827	2.03746	0.190496	10.6955	1.07e-26	5.38e-25
Gh_A06G1443	26.3975	2.03733	0.423727	4.80811	1.52e-06	1.14e-05
Gh_A09G0224	23.5383	2.03708	0.441779	4.61109	4.01e-06	2.78e-05
Gh_A08G2533	808.675	2.03691	0.368451	5.52832	3.23e-08	3.14e-07
Gh_D12G0866	32.4942	2.0306	0.375927	5.40159	6.61e-08	6.16e-07
Gh_A13G1998	31.9461	2.02998	0.372122	5.45514	4.89e-08	4.63e-07
Gh_A09G0934	56.1862	2.0291	0.340889	5.95239	2.64e-09	2.97e-08
Gh_D07G0940	205.76	2.02792	0.288738	7.02341	2.17e-12	3.52e-11
Gh_Sca072123G01	7.89033	2.02778	0.515081	3.93682	8.26e-05	0.000440368
Gh_D02G1759	16.7938	2.02516	0.444298	4.5581	5.16e-06	3.5e-05
Gh_D05G0171	47.8995	2.02192	0.406962	4.96832	6.75e-07	5.36e-06
Gh_D04G1826	450.31	2.02061	0.400254	5.0483	4.46e-07	3.64e-06
Gh_A03G0434	111.01	2.01962	0.299926	6.73373	1.65e-11	2.44e-10
Gh_A01G1096	91.0776	2.01872	0.283583	7.11863	1.09e-12	1.83e-11
Gh_A07G0485	3822.54	2.01864	0.148235	13.6178	3.14e-42	3.52e-40
Gh_D04G1920	158.871	2.01822	0.186408	10.8269	2.57e-27	1.35e-25
Gh_A01G1881	105.165	2.01785	0.318091	6.34361	2.24e-10	2.88e-09
Gh_D10G2541	63.4517	2.01695	0.325456	6.19732	5.74e-10	7.02e-09
Gh_D11G0222	13.5609	2.01557	0.491851	4.09793	4.17e-05	0.000236361
Gh_D02G1858	45.332	2.01478	0.32131	6.27051	3.6e-10	4.5e-09
Gh_A03G0543	1887.77	2.01438	0.0794321	25.3598	7e-142	1.78e-138
Gh_A11G0723	332.901	2.01274	0.244743	8.22391	1.97e-16	4.71e-15
Gh_D13G0111	18.5121	2.01271	0.473842	4.24763	2.16e-05	0.000129861
Gh_D11G3261	95.976	2.0126	0.302857	6.64539	3.02e-11	4.31e-10
Gh_D10G0599	1033	2.01248	0.148125	13.5864	4.82e-42	5.34e-40
Gh_A03G0596	55.3374	2.0074	0.321763	6.23874	4.41e-10	5.46e-09
Gh_A08G0094	43.1264	2.00657	0.30855	6.50323	7.86e-11	1.06e-09
Gh_D07G0683	1307.25	2.00633	0.174925	11.4696	1.88e-30	1.18e-28
Gh_A10G0468	37.6763	2.00565	0.50424	3.97756	6.96e-05	0.000376662
Gh_D05G2069	154.428	2.00452	0.236865	8.46271	2.61e-17	6.75e-16
Gh_D07G1486	13.6654	2.00431	0.538209	3.72403	0.000196067	0.00096223
Gh_D09G0599	4.44841	2.00372	0.535681	3.74051	0.000183647	0.000907112
Gh_D04G0718	62.8979	2.00301	0.283343	7.0692	1.56e-12	2.58e-11
Gh_A01G1161	420.007	2.00278	0.174505	11.4769	1.72e-30	1.09e-28
Gh_A08G2531	470.851	2.00239	0.462785	4.32683	1.51e-05	9.39e-05
Gh_A09G1638	13.3575	2.00167	0.492034	4.06816	4.74e-05	0.000265461
Gh_A11G0877	370.77	2.00126	0.179589	11.1435	7.7e-29	4.44e-27
Gh_A05G3470	159.01	1.99971	0.237724	8.41189	4.03e-17	1.02e-15
Gh_A03G1568	89.3995	1.99956	0.255657	7.82126	5.23e-15	1.11e-13
Gh_D11G1886	97.106	1.99908	0.293902	6.80186	1.03e-11	1.56e-10
Gh_A13G0294	13521.2	1.9984	0.166423	12.008	3.23e-33	2.37e-31
Gh_D02G1730	745.322	1.99804	0.16974	11.7712	5.49e-32	3.77e-30
Gh_D12G0748	51.5708	1.99764	0.32098	6.22356	4.86e-10	5.98e-09
Gh_D08G0044	18.798	1.99624	0.523674	3.812	0.000137848	0.000701016
Gh_D08G0931	275.894	1.99559	0.189988	10.5038	8.3e-26	3.95e-24
Gh_D04G0504	38.0281	1.9953	0.40899	4.87861	1.07e-06	8.16e-06
Gh_D12G0901	34.83	1.99448	0.38392	5.19503	2.05e-07	1.76e-06
Gh_D13G1493	1005.77	1.99412	0.203919	9.77898	1.39e-22	5.29e-21
Gh_A12G2633	88.2665	1.99297	0.297085	6.70842	1.97e-11	2.87e-10
Gh_D02G0316	50.5567	1.99265	0.32415	6.14729	7.88e-10	9.5e-09
Gh_D06G0740	19.806	1.99177	0.453809	4.38902	1.14e-05	7.24e-05
Gh_D10G1422	242.575	1.99125	0.233488	8.5283	1.49e-17	3.91e-16
Gh_A03G1973	199.643	1.99028	0.237464	8.38139	5.23e-17	1.31e-15
Gh_A02G0043	403.9	1.98998	0.245729	8.09829	5.57e-16	1.28e-14
Gh_D13G1674	205.137	1.98843	0.206154	9.64534	5.14e-22	1.88e-20
Gh_D12G0290	14.7906	1.98841	0.454704	4.37299	1.23e-05	7.74e-05
Gh_A13G1881	565.229	1.98672	0.200893	9.88945	4.63e-23	1.81e-21
Gh_D04G1473	96.8896	1.98586	0.281355	7.05819	1.69e-12	2.78e-11
Gh_D12G2314	42.7627	1.9841	0.361066	5.49512	3.9e-08	3.76e-07
Gh_A13G0692	6.19869	1.98358	0.528885	3.75049	0.000176488	0.000876184
Gh_D05G2938	204.282	1.98213	0.212404	9.33186	1.04e-20	3.48e-19
Gh_D05G2873	2.1443	1.98197	0.499757	3.96588	7.31e-05	0.00039382
Gh_A11G0479	57.2616	1.98193	0.319948	6.19453	5.85e-10	7.13e-09
Gh_A07G0276	90.7544	1.98131	0.283163	6.99707	2.61e-12	4.22e-11
Gh_D09G2123	17.7439	1.98127	0.463613	4.27354	1.92e-05	0.000116799
Gh_D06G0727	12.7156	1.98115	0.486168	4.07504	4.6e-05	0.000258306
Gh_A01G1767	2538.99	1.9803	0.151947	13.0328	7.96e-39	7.58e-37
Gh_D05G3204	27.1695	1.97994	0.392848	5.03997	4.66e-07	3.79e-06
Gh_A10G1028	7.80439	1.9791	0.528858	3.74222	0.000182405	0.000901722
Gh_D08G0468	179.266	1.97898	0.214329	9.23338	2.62e-20	8.52e-19
Gh_Sca120267G01	17.8345	1.97891	0.482885	4.09809	4.17e-05	0.000236248
Gh_D06G0422	39.7264	1.97885	0.364308	5.4318	5.58e-08	5.24e-07
Gh_A11G1542	394.108	1.97858	0.204631	9.66903	4.08e-22	1.5e-20
Gh_D11G0999	100.182	1.97813	0.273652	7.22864	4.88e-13	8.47e-12
Gh_D05G1125	25.055	1.97623	0.397924	4.96636	6.82e-07	5.41e-06
Gh_D05G2808	68.206	1.97496	0.37431	5.27627	1.32e-07	1.17e-06
Gh_D12G0095	12.6985	1.97491	0.518883	3.80608	0.000141184	0.000716698
Gh_D12G2715	239.395	1.97481	0.376621	5.2435	1.58e-07	1.38e-06
Gh_D10G0080	19.0034	1.9745	0.521668	3.78498	0.000153722	0.000773612
Gh_A01G0459	65.4569	1.97146	0.491163	4.01385	5.97e-05	0.000327688
Gh_A10G0197	387.752	1.97118	0.228752	8.61712	6.87e-18	1.85e-16
Gh_D04G1295	21.7831	1.97051	0.450811	4.37104	1.24e-05	7.81e-05
Gh_D07G1034	114.653	1.97049	0.398526	4.94445	7.64e-07	6e-06
Gh_A07G0873	262.48	1.96927	0.174902	11.2593	2.08e-29	1.24e-27
Gh_D10G1175	14.8071	1.96892	0.443049	4.44402	8.83e-06	5.73e-05
Gh_A03G1517	12.8553	1.96814	0.514064	3.8286	0.000128876	0.000658542
Gh_D13G2112	21.6427	1.96799	0.427358	4.60502	4.12e-06	2.85e-05
Gh_A12G0486	48.6739	1.96621	0.329301	5.97086	2.36e-09	2.67e-08
Gh_A03G0353	95.2598	1.96613	0.364976	5.38702	7.16e-08	6.64e-07
Gh_D06G1311	369.841	1.9647	0.190337	10.3223	5.59e-25	2.53e-23
Gh_A07G2296	33.3357	1.96262	0.360428	5.44526	5.17e-08	4.88e-07
Gh_D05G1277	21.705	1.96224	0.524584	3.74057	0.000183606	0.000906984
Gh_A07G2181	58.4081	1.96168	0.317238	6.18363	6.26e-10	7.63e-09
Gh_A05G1750	10.492	1.96028	0.498661	3.93108	8.46e-05	0.000449932
Gh_D03G1852	20.6475	1.95979	0.434806	4.50728	6.57e-06	4.37e-05
Gh_D09G0193	24.6034	1.95445	0.386673	5.05453	4.31e-07	3.53e-06
Gh_D12G2429	110.072	1.95361	0.326587	5.9819	2.21e-09	2.51e-08
Gh_D06G1853	54.3544	1.95358	0.363111	5.38012	7.44e-08	6.88e-07
Gh_A11G2823	74.6562	1.95348	0.276777	7.05794	1.69e-12	2.78e-11
Gh_D02G1079	17.5599	1.95273	0.488012	4.0014	6.3e-05	0.000344059
Gh_D10G2530	153.731	1.94968	0.226274	8.61649	6.9e-18	1.86e-16
Gh_Sca009206G01	110.131	1.94924	0.329225	5.9207	3.21e-09	3.57e-08
Gh_D13G0836	4112.52	1.94909	0.17122	11.3836	5.05e-30	3.13e-28
Gh_D07G1896	86.238	1.9485	0.236299	8.2459	1.64e-16	3.96e-15
Gh_A08G1884	88.2646	1.94781	0.275453	7.07132	1.53e-12	2.54e-11
Gh_A12G0622	124.919	1.94735	0.27202	7.15883	8.14e-13	1.38e-11
Gh_A08G1839	185.663	1.94666	0.217832	8.93652	4.02e-19	1.19e-17
Gh_A12G0524	65.846	1.94618	0.326941	5.95271	2.64e-09	2.96e-08
Gh_D04G1861	128.663	1.94607	0.255336	7.6216	2.51e-14	4.95e-13
Gh_D12G1296	14.5607	1.94323	0.452913	4.29052	1.78e-05	0.000109062
Gh_A08G2057	15.5699	1.94034	0.47404	4.0932	4.25e-05	0.000240822
Gh_D04G1450	39.107	1.93907	0.322826	6.00655	1.9e-09	2.18e-08
Gh_D11G1083	747.599	1.93898	0.166408	11.652	2.24e-31	1.48e-29
Gh_A12G1623	100.468	1.93821	0.268763	7.2116	5.53e-13	9.55e-12
Gh_D02G0331	74.2023	1.93739	0.300239	6.45282	1.1e-10	1.46e-09
Gh_A12G2292	62.1606	1.93737	0.361634	5.35727	8.45e-08	7.74e-07
Gh_A07G0199	181.243	1.93737	0.278887	6.94678	3.74e-12	5.94e-11
Gh_D05G0836	109.406	1.93732	0.241153	8.03358	9.47e-16	2.14e-14
Gh_A08G0144	6.19432	1.93725	0.527684	3.67124	0.000241378	0.00115937
Gh_D06G1752	216.984	1.93663	0.184654	10.4879	9.82e-26	4.65e-24
Gh_D09G0398	23.0959	1.93491	0.388645	4.97859	6.4e-07	5.1e-06
Gh_D12G1617	56.7277	1.93465	0.290627	6.65681	2.8e-11	4.01e-10
Gh_D12G0293	22.6746	1.93456	0.436915	4.42778	9.52e-06	6.14e-05
Gh_A01G1781	89.1669	1.93417	0.235852	8.20079	2.39e-16	5.67e-15
Gh_D06G1748	129.052	1.93382	0.277019	6.98082	2.93e-12	4.72e-11
Gh_A08G0005	31.591	1.93329	0.412644	4.68514	2.8e-06	1.99e-05
Gh_A09G0592	17.9862	1.93297	0.431126	4.48355	7.34e-06	4.84e-05
Gh_D04G1775	16.4538	1.93235	0.450535	4.28901	1.79e-05	0.000109726
Gh_D04G0716	430.152	1.93192	0.187443	10.3067	6.57e-25	2.95e-23
Gh_A05G3518	65.3733	1.93122	0.288555	6.6927	2.19e-11	3.18e-10
Gh_Sca004821G01	39.2217	1.93085	0.377386	5.11639	3.11e-07	2.61e-06
Gh_D07G2180	65.6794	1.93047	0.295276	6.53785	6.24e-11	8.54e-10
Gh_D04G1001	30.5166	1.93026	0.537604	3.59049	0.000330052	0.00152902
Gh_D02G0879	44.3564	1.93023	0.42498	4.54194	5.57e-06	3.76e-05
Gh_A03G0455	75.7657	1.92946	0.248319	7.77006	7.84e-15	1.63e-13
Gh_A13G1951	272.168	1.92909	0.169698	11.3678	6.05e-30	3.74e-28
Gh_D12G1827	473.847	1.92872	0.126988	15.1882	4.23e-52	6.58e-50
Gh_A13G0566	732.369	1.92834	0.13379	14.4132	4.27e-47	5.72e-45
Gh_A05G0576	833.056	1.92781	0.131307	14.6817	8.44e-49	1.22e-46
Gh_D06G0396	654.231	1.9261	0.147948	13.0187	9.57e-39	9.06e-37
Gh_A01G0897	361.44	1.92514	0.196703	9.78705	1.28e-22	4.91e-21
Gh_A06G0110	237.974	1.9251	0.233314	8.25112	1.57e-16	3.79e-15
Gh_A11G1690	176.686	1.92413	0.36284	5.30299	1.14e-07	1.02e-06
Gh_D03G1732	35.3346	1.92326	0.377331	5.09699	3.45e-07	2.87e-06
Gh_A02G0117	30.4219	1.92267	0.425972	4.51362	6.37e-06	4.25e-05
Gh_A04G0321	188.651	1.92236	0.249127	7.71638	1.2e-14	2.45e-13
Gh_A11G0940	435.6	1.92147	0.155689	12.3417	5.4e-35	4.29e-33
Gh_A08G0331	518.689	1.92112	0.202526	9.48579	2.41e-21	8.37e-20
Gh_D07G0238	32.0516	1.91992	0.380587	5.04462	4.54e-07	3.71e-06
Gh_A07G0780	364.096	1.91686	0.184048	10.415	2.12e-25	9.87e-24
Gh_A11G1504	9.41689	1.91646	0.533986	3.58897	0.000331991	0.00153704
Gh_Sca034702G01	10.7439	1.91633	0.497617	3.85101	0.000117632	0.00060629
Gh_A05G1155	462.057	1.91613	0.417546	4.58903	4.45e-06	3.06e-05
Gh_D08G2197	215.995	1.91612	0.217534	8.80837	1.27e-18	3.62e-17
Gh_A05G2132	83.2477	1.91556	0.266595	7.18528	6.71e-13	1.15e-11
Gh_A13G0818	975.047	1.91529	0.163549	11.7108	1.12e-31	7.57e-30
Gh_D12G2832	111.862	1.91432	0.280906	6.81478	9.44e-12	1.44e-10
Gh_D06G1307	93.11	1.91411	0.336987	5.68007	1.35e-08	1.38e-07
Gh_D02G1741	93.9947	1.91354	0.242063	7.90511	2.68e-15	5.82e-14
Gh_A11G0118	42.5046	1.9135	0.404125	4.73491	2.19e-06	1.59e-05
Gh_A10G0107	600.629	1.91343	0.232185	8.24096	1.71e-16	4.12e-15
Gh_D02G0240	57.0828	1.91292	0.341564	5.60048	2.14e-08	2.13e-07
Gh_D13G1001	833.172	1.91268	0.166906	11.4597	2.1e-30	1.32e-28
Gh_A10G0400	16.4116	1.91103	0.500127	3.82109	0.000132864	0.000677463
Gh_D13G0432	77.7088	1.90986	0.236639	8.0708	6.98e-16	1.59e-14
Gh_A01G0875	111.854	1.90938	0.512973	3.72218	0.000197513	0.000968847
Gh_A04G1342	21.8925	1.90921	0.397263	4.80591	1.54e-06	1.15e-05
Gh_A05G0505	374.141	1.90885	0.186834	10.2168	1.67e-24	7.26e-23
Gh_D13G1348	31.5339	1.90832	0.456527	4.18007	2.91e-05	0.000170816
Gh_A05G0260	783.997	1.90743	0.350191	5.44682	5.13e-08	4.84e-07
Gh_A12G0033	63.0336	1.9074	0.454345	4.19813	2.69e-05	0.00015899
Gh_A05G1397	53.6868	1.90732	0.376714	5.06306	4.13e-07	3.39e-06
Gh_A05G2237	137.163	1.90663	0.264293	7.21408	5.43e-13	9.38e-12
Gh_D13G1465	246.384	1.90336	0.198457	9.59079	8.74e-22	3.13e-20
Gh_A09G0376	23.0733	1.90306	0.383574	4.96138	7e-07	5.54e-06
Gh_D05G1562	27.6438	1.90248	0.472894	4.02306	5.74e-05	0.000316616
Gh_A10G1793	23.018	1.90228	0.464397	4.09624	4.2e-05	0.000237893
Gh_D09G2346	295.158	1.89957	0.187756	10.1172	4.63e-24	1.96e-22
Gh_A08G1835	485.773	1.89944	0.170649	11.1307	8.9e-29	5.1e-27
Gh_A05G3445	1593.94	1.89633	0.165818	11.4363	2.76e-30	1.72e-28
Gh_A02G0890	32.7752	1.8955	0.374332	5.06367	4.11e-07	3.38e-06
Gh_D03G1221	20.4015	1.89426	0.43168	4.38812	1.14e-05	7.26e-05
Gh_D01G0370	250.622	1.8931	0.221342	8.55284	1.2e-17	3.19e-16
Gh_A13G0787	81.9233	1.89299	0.370658	5.10712	3.27e-07	2.73e-06
Gh_A05G1800	4.43666	1.89262	0.536415	3.52828	0.000418269	0.00188817
Gh_A13G1904	68.7084	1.89259	0.26414	7.1651	7.77e-13	1.32e-11
Gh_D08G1220	86.5621	1.89192	0.287418	6.58249	4.63e-11	6.42e-10
Gh_D06G1335	178.46	1.89161	0.325776	5.80647	6.38e-09	6.81e-08
Gh_D09G0743	53.0653	1.8916	0.535934	3.52954	0.00041628	0.00188019
Gh_D09G2157	23.9617	1.89115	0.498988	3.78997	0.000150664	0.000760281
Gh_D06G0033	17.2005	1.89077	0.463184	4.08212	4.46e-05	0.000251434
Gh_A10G0594	2800.04	1.88859	0.145008	13.024	8.94e-39	8.47e-37
Gh_D08G0182	6.56129	1.88748	0.528877	3.56885	0.000358558	0.00164774
Gh_A08G1481	7.58209	1.88499	0.500747	3.76436	0.000166978	0.000833351
Gh_D07G2064	104.593	1.88471	0.289575	6.50855	7.59e-11	1.03e-09
Gh_A02G1313	490.294	1.88447	0.393468	4.78939	1.67e-06	1.24e-05
Gh_D10G0256	81.4807	1.88414	0.338188	5.57128	2.53e-08	2.49e-07
Gh_D11G0606	137.34	1.88395	0.246389	7.64623	2.07e-14	4.13e-13
Gh_A13G1686	484.753	1.88388	0.32199	5.85074	4.89e-09	5.32e-08
Gh_D02G2024	25.5523	1.88101	0.388734	4.83882	1.31e-06	9.84e-06
Gh_D03G0678	1267.52	1.88002	0.159847	11.7614	6.17e-32	4.21e-30
Gh_D10G1501	9.36847	1.87879	0.488868	3.84314	0.00012147	0.000624126
Gh_A07G2295	33.6507	1.87756	0.495363	3.79027	0.000150482	0.000759494
Gh_A05G3847	83.6195	1.87676	0.242418	7.74185	9.8e-15	2.02e-13
Gh_A11G1413	1696.49	1.8764	0.172916	10.8515	1.96e-27	1.04e-25
Gh_A09G0247	40.7644	1.87548	0.380359	4.93083	8.19e-07	6.39e-06
Gh_D02G0135	45.2053	1.87503	0.377623	4.96535	6.86e-07	5.44e-06
Gh_A02G0032	85.4089	1.873	0.302845	6.18468	6.22e-10	7.58e-09
Gh_A10G1688	36.9876	1.87157	0.453793	4.12428	3.72e-05	0.000212956
Gh_A08G2218	7.31305	1.87119	0.512054	3.65429	0.000257896	0.00122968
Gh_A12G1026	22.9894	1.86945	0.417222	4.4807	7.44e-06	4.9e-05
Gh_A12G1756	576.63	1.86888	0.147932	12.6334	1.38e-36	1.18e-34
Gh_A05G1264	33.8107	1.86832	0.396686	4.70981	2.48e-06	1.78e-05
Gh_A06G1485	60.2563	1.86788	0.319842	5.84002	5.22e-09	5.65e-08
Gh_D07G1120	312.855	1.86771	0.269273	6.93613	4.03e-12	6.38e-11
Gh_A09G2373	31.0079	1.86325	0.408846	4.55735	5.18e-06	3.51e-05
Gh_D10G0111	231.801	1.86252	0.18645	9.98941	1.7e-23	6.87e-22
Gh_A08G1463	81.0153	1.86238	0.238912	7.79527	6.43e-15	1.35e-13
Gh_D08G2462	443.369	1.86203	0.177193	10.5085	7.89e-26	3.76e-24
Gh_D05G2255	4.13392	1.86165	0.53704	3.46651	0.000527264	0.00231575
Gh_D13G0925	35.3922	1.86116	0.493878	3.76845	0.000164263	0.000820831
Gh_A12G2423	7.51135	1.85994	0.535622	3.47249	0.000515657	0.00227097
Gh_A03G0256	9.3169	1.8599	0.526425	3.53308	0.000410751	0.00185889
Gh_D04G1022	51.2367	1.8593	0.310869	5.98096	2.22e-09	2.52e-08
Gh_A04G0151	16.3346	1.85878	0.463389	4.01127	6.04e-05	0.000331077
Gh_D09G1507	128.329	1.85794	0.243795	7.62092	2.52e-14	4.97e-13
Gh_A03G1694	51.8034	1.85557	0.329932	5.62412	1.86e-08	1.87e-07
Gh_D09G1622	212.009	1.85508	0.221343	8.38099	5.25e-17	1.32e-15
Gh_A07G2100	11.2912	1.85369	0.52221	3.5497	0.000385671	0.00175903
Gh_D10G1499	9.67624	1.85349	0.501678	3.69459	0.000220244	0.00106872
Gh_A04G1184	78.7517	1.85341	0.243684	7.60579	2.83e-14	5.57e-13
Gh_A10G0248	25.1641	1.85283	0.420822	4.4029	1.07e-05	6.83e-05
Gh_A08G0505	210.737	1.85152	0.197561	9.37186	7.13e-21	2.41e-19
Gh_D13G1697	44.8889	1.85086	0.313673	5.9006	3.62e-09	4e-08
Gh_A13G0189	44.087	1.85046	0.36055	5.13231	2.86e-07	2.41e-06
Gh_D06G2377	14.8177	1.84982	0.537869	3.43916	0.000583521	0.00253497
Gh_D01G1992	123.398	1.84813	0.255958	7.22045	5.18e-13	8.97e-12
Gh_D05G1430	10.6412	1.84787	0.51885	3.56147	0.000368783	0.0016899
Gh_A03G2074	44.1992	1.84787	0.331991	5.56601	2.61e-08	2.56e-07
Gh_D13G1850	15.9261	1.84766	0.513385	3.59899	0.000319461	0.00148527
Gh_D11G2981	109.748	1.84762	0.235348	7.85059	4.14e-15	8.87e-14
Gh_A12G0329	70.2965	1.84745	0.238336	7.75145	9.08e-15	1.88e-13
Gh_D12G1769	103.042	1.84588	0.255627	7.22101	5.16e-13	8.94e-12
Gh_D12G2560	417.871	1.84514	0.139496	13.2272	6.12e-40	6.12e-38
Gh_Sca005023G02	12.3008	1.84436	0.483649	3.81342	0.000137057	0.000697174
Gh_A04G1019	57.5045	1.84417	0.299044	6.1669	6.96e-10	8.43e-09
Gh_D05G0839	68.882	1.84385	0.333227	5.53333	3.14e-08	3.06e-07
Gh_D07G2445	74.6839	1.84341	0.313999	5.87073	4.34e-09	4.75e-08
Gh_A05G0440	55.375	1.8432	0.313261	5.88392	4.01e-09	4.4e-08
Gh_A13G0232	268.747	1.84258	0.149423	12.3313	6.14e-35	4.88e-33
Gh_A07G0470	22.9064	1.84173	0.407452	4.52012	6.18e-06	4.13e-05
Gh_D13G0235	299.419	1.84159	0.225502	8.16662	3.17e-16	7.45e-15
Gh_A11G3238	1489.6	1.839	0.129589	14.191	1.04e-45	1.33e-43
Gh_A01G1743	97.2358	1.83737	0.283508	6.48083	9.12e-11	1.23e-09
Gh_A06G1122	123.173	1.83731	0.26662	6.89113	5.53e-12	8.62e-11
Gh_A08G0098	13.9305	1.83683	0.478625	3.83773	0.000124175	0.000636542
Gh_D11G0141	1504.95	1.83652	0.163329	11.2443	2.47e-29	1.46e-27
Gh_D02G0979	39.1761	1.83646	0.352252	5.21348	1.85e-07	1.61e-06
Gh_D08G0682	90.6078	1.83538	0.301162	6.09432	1.1e-09	1.3e-08
Gh_A06G1770	1194.34	1.83469	0.179476	10.2225	1.57e-24	6.85e-23
Gh_A03G1301	87.2353	1.83373	0.271679	6.74963	1.48e-11	2.2e-10
Gh_A11G0415	12.1745	1.83286	0.528465	3.46828	0.000523809	0.00230228
Gh_A05G1262	75.757	1.83253	0.357091	5.13182	2.87e-07	2.41e-06
Gh_Sca106915G01	4.90496	1.83156	0.53411	3.42918	0.000605399	0.00261816
Gh_A12G1118	4.01516	1.83146	0.533264	3.43444	0.00059378	0.00257465
Gh_A08G1372	232.396	1.83116	0.204378	8.95968	3.26e-19	9.72e-18
Gh_D02G1310	28.0075	1.8309	0.408862	4.47805	7.53e-06	4.95e-05
Gh_D03G0108	16.8132	1.83061	0.455863	4.01571	5.93e-05	0.000325362
Gh_A09G1919	16.8041	1.82878	0.445781	4.10241	4.09e-05	0.000232257
Gh_A09G2205	190.513	1.82865	0.275207	6.64464	3.04e-11	4.33e-10
Gh_A05G2805	301.155	1.82831	0.140142	13.0461	6.69e-39	6.41e-37
Gh_D13G0430	59.0292	1.82629	0.380394	4.80107	1.58e-06	1.17e-05
Gh_D05G3292	29.1965	1.82601	0.434513	4.20244	2.64e-05	0.000156258
Gh_D04G0674	1030.67	1.82593	0.161282	11.3214	1.03e-29	6.23e-28
Gh_D12G1596	770.422	1.82518	0.170052	10.7331	7.12e-27	3.64e-25
Gh_A10G0347	104.421	1.82449	0.347784	5.24603	1.55e-07	1.36e-06
Gh_A07G1741	1414.71	1.82396	0.201564	9.04903	1.44e-19	4.44e-18
Gh_D09G0520	58.9782	1.82241	0.399361	4.56331	5.04e-06	3.42e-05
Gh_A10G1564	5.31786	1.8224	0.533088	3.41856	0.000629525	0.00271382
Gh_A08G0019	3.1951	1.82226	0.531852	3.42625	0.000611972	0.00264371
Gh_A03G2152	180.886	1.82205	0.267283	6.81694	9.3e-12	1.41e-10
Gh_A07G1742	3616.43	1.82182	0.207512	8.77935	1.64e-18	4.65e-17
Gh_D08G1407	191.324	1.82162	0.22347	8.15151	3.59e-16	8.41e-15
Gh_A09G0944	27.1365	1.82111	0.464486	3.92071	8.83e-05	0.000467732
Gh_A09G1896	4.02574	1.81984	0.534501	3.40475	0.000662238	0.00283595
Gh_D08G0461	30.0745	1.81974	0.38152	4.7697	1.85e-06	1.36e-05
Gh_A09G1854	4565.37	1.81949	0.142605	12.7589	2.78e-37	2.44e-35
Gh_D08G2170	102.192	1.81947	0.213134	8.53674	1.38e-17	3.64e-16
Gh_Sca005193G01	9.58393	1.81798	0.531417	3.42101	0.000623896	0.0026917
Gh_D03G0451	211.112	1.81738	0.390145	4.65822	3.19e-06	2.25e-05
Gh_Sca013634G01	881.482	1.81732	0.215933	8.41612	3.89e-17	9.9e-16
Gh_D12G2214	238.177	1.81676	0.161229	11.2682	1.88e-29	1.13e-27
Gh_D12G1101	635.698	1.81663	0.204789	8.87077	7.26e-19	2.11e-17
Gh_D10G2458	53.7149	1.81332	0.338447	5.35777	8.43e-08	7.72e-07
Gh_D05G2384	6672.78	1.81277	0.131122	13.8251	1.8e-43	2.09e-41
Gh_D11G0334	275.135	1.81227	0.218888	8.27943	1.24e-16	3.02e-15
Gh_A11G0857	39.8154	1.81126	0.425235	4.25945	2.05e-05	0.000123656
Gh_A01G0281	479.326	1.81076	0.148688	12.1783	4.06e-34	3.11e-32
Gh_D08G2390	59.2339	1.8105	0.269918	6.70759	1.98e-11	2.89e-10
Gh_D05G3904	98.7373	1.80845	0.277882	6.50796	7.62e-11	1.03e-09
Gh_D04G1298	230.796	1.80817	0.312582	5.78464	7.27e-09	7.71e-08
Gh_A10G1047	115.42	1.80788	0.226584	7.97884	1.48e-15	3.28e-14
Gh_A11G0575	38.5135	1.80783	0.323298	5.59183	2.25e-08	2.23e-07
Gh_A02G0843	17.1013	1.8069	0.434177	4.16167	3.16e-05	0.000183683
Gh_A01G1823	51.8327	1.805	0.358161	5.03964	4.66e-07	3.8e-06
Gh_D01G0175	55.7663	1.8043	0.384331	4.69464	2.67e-06	1.91e-05
Gh_A05G3961	1215.5	1.80421	0.275277	6.55416	5.6e-11	7.68e-10
Gh_D11G0788	955.464	1.80412	0.11347	15.8995	6.39e-57	1.16e-54
Gh_D12G0067	55.1801	1.80394	0.330815	5.45303	4.95e-08	4.68e-07
Gh_A09G1508	186.519	1.80392	0.464238	3.88575	0.000102013	0.000532519
Gh_D12G1623	301.576	1.80232	0.28671	6.2862	3.25e-10	4.09e-09
Gh_D10G2454	234.774	1.80208	0.373449	4.82551	1.4e-06	1.05e-05
Gh_D07G1143	26.9977	1.80163	0.381889	4.71768	2.39e-06	1.72e-05
Gh_A10G2124	872.226	1.80153	0.41487	4.34239	1.41e-05	8.8e-05
Gh_A05G3814	617.062	1.80147	0.199557	9.02735	1.76e-19	5.38e-18
Gh_A04G1404	1550.71	1.80138	0.1391	12.9502	2.34e-38	2.17e-36
Gh_D12G0767	16.0653	1.80108	0.496151	3.6301	0.000283307	0.00133586
Gh_D02G1367	66.9509	1.79886	0.353703	5.08579	3.66e-07	3.03e-06
Gh_D10G0695	1300.91	1.79872	0.117295	15.3351	4.46e-53	7.13e-51
Gh_A05G0318	1083.64	1.79865	0.135613	13.2631	3.79e-40	3.83e-38
Gh_D03G1219	244.056	1.79812	0.184417	9.75028	1.84e-22	6.97e-21
Gh_A13G1386	58.7235	1.7976	0.295003	6.09352	1.1e-09	1.31e-08
Gh_D08G1556	2253.63	1.79616	0.170906	10.5096	7.8e-26	3.72e-24
Gh_A09G2300	132.655	1.79593	0.320485	5.60378	2.1e-08	2.09e-07
Gh_D05G2124	24.2536	1.79562	0.387573	4.63298	3.6e-06	2.52e-05
Gh_D07G1304	38.5157	1.79556	0.375995	4.77548	1.79e-06	1.32e-05
Gh_A06G1611	9.93635	1.79515	0.51303	3.49911	0.000466813	0.00208189
Gh_D05G2939	165.737	1.79462	0.19992	8.97666	2.79e-19	8.4e-18
Gh_A02G1312	549.297	1.79425	0.319345	5.61852	1.93e-08	1.93e-07
Gh_A07G2336	496.765	1.79383	0.135977	13.1922	9.73e-40	9.67e-38
Gh_A02G1482	112.676	1.79349	0.500422	3.58395	0.000338439	0.00156422
Gh_A05G3321	580.902	1.79227	0.242432	7.39287	1.44e-13	2.65e-12
Gh_A11G2657	51.1606	1.79211	0.33556	5.34066	9.26e-08	8.45e-07
Gh_A12G0900	790.882	1.79159	0.203526	8.80275	1.34e-18	3.8e-17
Gh_A12G0458	143.334	1.78981	0.261208	6.85206	7.28e-12	1.12e-10
Gh_D08G2293	210.739	1.78981	0.266778	6.70896	1.96e-11	2.86e-10
Gh_D10G1061	75.5452	1.78978	0.298294	6.00006	1.97e-09	2.26e-08
Gh_D01G0856	116.21	1.78899	0.289376	6.18221	6.32e-10	7.69e-09
Gh_D13G2397	32.9866	1.78823	0.406176	4.40261	1.07e-05	6.83e-05
Gh_D05G0699	19.3916	1.78792	0.538028	3.3231	0.000890232	0.00368326
Gh_A09G0273	322.862	1.78732	0.159557	11.2017	4e-29	2.34e-27
Gh_A10G2137	47.0318	1.78659	0.319546	5.59103	2.26e-08	2.24e-07
Gh_A09G0608	25.7174	1.78623	0.456065	3.91661	8.98e-05	0.000475114
Gh_A10G0809	647.779	1.78574	0.163163	10.9445	7.06e-28	3.84e-26
Gh_A10G2339	28.1664	1.78569	0.359625	4.96542	6.86e-07	5.43e-06
Gh_A07G0400	109.354	1.7852	0.435527	4.09895	4.15e-05	0.000235461
Gh_A12G0155	76.2883	1.78417	0.265672	6.71569	1.87e-11	2.74e-10
Gh_D06G0412	229.717	1.7835	0.171965	10.3713	3.35e-25	1.54e-23
Gh_A10G2351	169.315	1.78285	0.374656	4.75864	1.95e-06	1.43e-05
Gh_D12G2337	275.572	1.78222	0.196214	9.08307	1.06e-19	3.28e-18
Gh_A05G0567	73.9756	1.78202	0.250965	7.10066	1.24e-12	2.07e-11
Gh_D13G2355	1396.46	1.77872	0.324933	5.47411	4.4e-08	4.19e-07
Gh_D11G0766	2071.6	1.77849	0.240436	7.39692	1.39e-13	2.57e-12
Gh_A12G1497	152.023	1.77496	0.379787	4.67357	2.96e-06	2.1e-05
Gh_A06G0605	242.382	1.77408	0.201963	8.78418	1.58e-18	4.47e-17
Gh_D08G1425	222.364	1.77389	0.215176	8.24393	1.67e-16	4.02e-15
Gh_D12G1194	13.1388	1.77316	0.50606	3.50386	0.00045857	0.00204912
Gh_A12G0429	61.1261	1.77288	0.349837	5.06773	4.03e-07	3.31e-06
Gh_D09G0619	9.44498	1.77282	0.508336	3.48751	0.000487545	0.0021643
Gh_D11G0658	361.267	1.77271	0.200091	8.85952	8.04e-19	2.33e-17
Gh_D12G0746	26.2711	1.77259	0.388642	4.56099	5.09e-06	3.46e-05
Gh_D07G1311	48.9938	1.77245	0.38126	4.64893	3.34e-06	2.34e-05
Gh_D05G0195	17.2428	1.77217	0.477687	3.70989	0.000207346	0.00101183
Gh_A02G1122	359.929	1.77212	0.289617	6.11886	9.42e-10	1.12e-08
Gh_A02G0571	199.91	1.77206	0.174136	10.1763	2.53e-24	1.09e-22
Gh_D10G1088	62.983	1.77167	0.327252	5.41377	6.17e-08	5.77e-07
Gh_Sca015865G01	7.18239	1.7715	0.534931	3.31164	0.000927513	0.00381972
Gh_D05G2839	101.735	1.77046	0.244345	7.24575	4.3e-13	7.51e-12
Gh_A04G0283	105.367	1.77035	0.186895	9.4724	2.73e-21	9.49e-20
Gh_A01G0637	33.7127	1.77022	0.376808	4.69793	2.63e-06	1.88e-05
Gh_Sca005520G01	8.30749	1.76952	0.466307	3.79476	0.000147787	0.000747218
Gh_A05G3168	20.451	1.76858	0.437129	4.04591	5.21e-05	0.00028936
Gh_A07G1243	67.0474	1.76783	0.275088	6.42643	1.31e-10	1.72e-09
Gh_D05G0722	18.7872	1.76768	0.413477	4.27515	1.91e-05	0.000116044
Gh_A08G0130	41.589	1.76742	0.356	4.96466	6.88e-07	5.45e-06
Gh_A06G0054	81.6274	1.76703	0.352576	5.01177	5.39e-07	4.34e-06
Gh_A06G1572	98.7305	1.76684	0.244676	7.22113	5.16e-13	8.93e-12
Gh_A03G1290	897.563	1.76669	0.14956	11.8126	3.36e-32	2.34e-30
Gh_A04G0129	63.4623	1.76646	0.358379	4.92905	8.26e-07	6.44e-06
Gh_A10G0796	1713.7	1.76629	0.174986	10.0939	5.88e-24	2.46e-22
Gh_A02G1163	122.515	1.76595	0.260052	6.79077	1.12e-11	1.68e-10
Gh_A05G2128	5712.8	1.76564	0.126629	13.9434	3.45e-44	4.11e-42
Gh_D12G0336	88.1706	1.76548	0.292115	6.04378	1.51e-09	1.75e-08
Gh_A10G1777	165.088	1.76526	0.236414	7.46681	8.22e-14	1.55e-12
Gh_Sca005081G01	33.0765	1.76498	0.362964	4.8627	1.16e-06	8.8e-06
Gh_A03G0597	1921.44	1.76407	0.110284	15.9956	1.37e-57	2.58e-55
Gh_A07G0459	1641.44	1.76311	0.178062	9.90166	4.09e-23	1.61e-21
Gh_D02G0762	23.0276	1.76254	0.43502	4.05162	5.09e-05	0.000283118
Gh_D11G3356	193.253	1.76233	0.287952	6.12021	9.35e-10	1.12e-08
Gh_D08G0415	373.354	1.76183	0.30035	5.86591	4.47e-09	4.88e-08
Gh_A05G3192	29.4987	1.76166	0.412748	4.26811	1.97e-05	0.000119434
Gh_D03G0317	23.5001	1.76128	0.393361	4.47751	7.55e-06	4.96e-05
Gh_D05G3739	83.2721	1.76087	0.305453	5.7648	8.18e-09	8.62e-08
Gh_A07G0928	54.3512	1.76062	0.375343	4.6907	2.72e-06	1.94e-05
Gh_A01G1731	16.5361	1.76037	0.409847	4.2952	1.75e-05	0.000106949
Gh_D12G1478	1878.49	1.76035	0.167564	10.5056	8.14e-26	3.87e-24
Gh_D12G0266	1405.2	1.75994	0.158449	11.1073	1.16e-28	6.6e-27
Gh_A08G2029	385.677	1.75988	0.180526	9.74864	1.87e-22	7.08e-21
Gh_D13G1193	29.37	1.75983	0.412917	4.26196	2.03e-05	0.000122386
Gh_D13G2427	155.728	1.75932	0.255927	6.87432	6.23e-12	9.66e-11
Gh_D13G2371	10.2533	1.75874	0.505022	3.4825	0.000496757	0.00219999
Gh_D06G1526	142.728	1.75871	0.213419	8.24064	1.71e-16	4.12e-15
Gh_D11G0584	147.147	1.75815	0.200933	8.74989	2.14e-18	5.98e-17
Gh_D05G3128	129.496	1.75806	0.203562	8.63651	5.8e-18	1.57e-16
Gh_D11G0907	90.5606	1.758	0.227379	7.7316	1.06e-14	2.19e-13
Gh_D03G1648	150.044	1.75793	0.243992	7.20487	5.81e-13	1e-11
Gh_A09G2436	1015.56	1.75633	0.200609	8.755	2.04e-18	5.73e-17
Gh_A12G0907	67.3549	1.75621	0.26734	6.5692	5.06e-11	6.99e-10
Gh_D02G0056	347.841	1.75408	0.196361	8.93295	4.15e-19	1.23e-17
Gh_A06G1664	529.965	1.75296	0.20032	8.7508	2.12e-18	5.93e-17
Gh_D09G2176	50.9908	1.75214	0.284633	6.15577	7.47e-10	9.02e-09
Gh_A06G1326	133.807	1.75166	0.192601	9.09477	9.48e-20	2.96e-18
Gh_A05G0802	62.5182	1.75128	0.43296	4.0449	5.23e-05	0.000290447
Gh_A09G1208	426.18	1.75072	0.204099	8.57781	9.67e-18	2.58e-16
Gh_D05G0136	10.5313	1.75009	0.447294	3.91263	9.13e-05	0.000482202
Gh_A04G1075	80.7085	1.74997	0.266917	6.55622	5.52e-11	7.58e-10
Gh_A11G0649	66.3414	1.74974	0.316673	5.52539	3.29e-08	3.19e-07
Gh_D10G0398	86.9914	1.74949	0.290023	6.03225	1.62e-09	1.88e-08
Gh_A01G1949	338.071	1.74917	0.190621	9.17619	4.47e-20	1.43e-18
Gh_A02G0375	87.1263	1.74871	0.322174	5.42785	5.7e-08	5.35e-07
Gh_A11G2044	61.5322	1.74833	0.291089	6.00619	1.9e-09	2.18e-08
Gh_A09G1792	101.515	1.74587	0.255398	6.83588	8.15e-12	1.25e-10
Gh_D13G1634	35.5151	1.74577	0.373529	4.67371	2.96e-06	2.1e-05
Gh_D11G3038	19.8003	1.74531	0.526953	3.31208	0.000926035	0.00381469
Gh_A02G0420	209.979	1.7445	0.235134	7.41917	1.18e-13	2.19e-12
Gh_D11G3154	21.384	1.7435	0.462966	3.76594	0.000165926	0.000828446
Gh_D10G0857	4.36794	1.74346	0.536244	3.25124	0.00114901	0.00461755
Gh_D12G1525	1239.68	1.74316	0.217019	8.03228	9.57e-16	2.16e-14
Gh_D07G1029	416.679	1.74271	0.187914	9.27401	1.79e-20	5.89e-19
Gh_A11G2478	33.7046	1.74227	0.338289	5.15024	2.6e-07	2.2e-06
Gh_D10G2422	3995.39	1.74185	0.136233	12.7858	1.97e-37	1.74e-35
Gh_A05G2699	102.675	1.74172	0.218132	7.98473	1.41e-15	3.13e-14
Gh_A05G1985	162.482	1.7414	0.231439	7.52426	5.3e-14	1.02e-12
Gh_Sca005055G02	56.6765	1.74122	0.254976	6.82896	8.55e-12	1.3e-10
Gh_D05G1129	94.4894	1.74091	0.308473	5.64366	1.66e-08	1.69e-07
Gh_A10G0076	33.4271	1.7395	0.465393	3.7377	0.000185712	0.000915717
Gh_D11G0259	11.6488	1.73897	0.486036	3.57786	0.000346425	0.00159716
Gh_D02G1319	9036.63	1.73874	0.123908	14.0325	9.86e-45	1.21e-42
Gh_A12G2371	283.227	1.73867	0.171979	10.1097	5e-24	2.11e-22
Gh_A13G0049	288.496	1.73866	0.343198	5.06605	4.06e-07	3.34e-06
Gh_D03G0316	62.6018	1.73845	0.326969	5.31686	1.06e-07	9.54e-07
Gh_A10G0447	6.27733	1.73816	0.534457	3.25219	0.00114519	0.00460375
Gh_A09G0785	104.539	1.73775	0.327644	5.30378	1.13e-07	1.02e-06
Gh_A05G0793	16.5912	1.73763	0.458574	3.7892	0.000151135	0.000762335
Gh_D05G1283	768.744	1.73761	0.241078	7.20768	5.69e-13	9.81e-12
Gh_D12G1227	202.53	1.73742	0.213496	8.13796	4.02e-16	9.37e-15
Gh_D12G1283	5.49383	1.73738	0.537063	3.23496	0.00121661	0.00485544
Gh_A07G0030	24.9585	1.73721	0.439943	3.94872	7.86e-05	0.000420665
Gh_D04G1796	114.028	1.73551	0.242803	7.1478	8.82e-13	1.49e-11
Gh_D08G2669	21.1596	1.73536	0.500923	3.46433	0.000531561	0.00233204
Gh_D03G0421	43.4284	1.73462	0.47035	3.68792	0.000226094	0.00109381
Gh_D08G0024	581.358	1.73305	0.306753	5.64966	1.61e-08	1.63e-07
Gh_A10G0329	13.3706	1.73299	0.482033	3.59517	0.00032418	0.00150463
Gh_D11G0533	25.5643	1.73232	0.515465	3.36069	0.000777467	0.00326504
Gh_A07G2212	846.696	1.73117	0.136952	12.6407	1.26e-36	1.09e-34
Gh_A06G1087	259.864	1.73016	0.206375	8.38358	5.13e-17	1.29e-15
Gh_A08G0649	636.133	1.72826	0.482316	3.58326	0.000339339	0.00156777
Gh_D13G0041	187.247	1.72786	0.226855	7.61659	2.6e-14	5.14e-13
Gh_A03G0935	6741.19	1.72698	0.122793	14.0642	6.3e-45	7.77e-43
Gh_D07G0348	322.148	1.72677	0.246085	7.01697	2.27e-12	3.68e-11
Gh_D01G0468	39.5135	1.72603	0.432223	3.99337	6.51e-05	0.000354556
Gh_A06G0766	33.2475	1.72601	0.442445	3.90107	9.58e-05	0.000503578
Gh_A07G0193	1579.34	1.72581	0.15206	11.3495	7.46e-30	4.57e-28
Gh_A09G0301	15.2331	1.72548	0.428184	4.02975	5.58e-05	0.000308484
Gh_D08G0670	677.041	1.72489	0.1806	9.55091	1.29e-21	4.55e-20
Gh_A11G0196	5.72224	1.72463	0.52745	3.26975	0.00107643	0.00435971
Gh_D06G1655	76.3529	1.72407	0.283004	6.09205	1.11e-09	1.32e-08
Gh_A02G0212	216.181	1.72394	0.220694	7.81145	5.65e-15	1.2e-13
Gh_A06G0791	1473.76	1.72391	0.148538	11.6058	3.85e-31	2.52e-29
Gh_D11G0808	393.586	1.7235	0.143814	11.9843	4.3e-33	3.14e-31
Gh_D05G0090	33.2559	1.72349	0.468774	3.6766	0.000236364	0.00113813
Gh_A10G0390	113.219	1.72287	0.285352	6.03772	1.56e-09	1.81e-08
Gh_A06G0602	23.2152	1.72287	0.408937	4.21305	2.52e-05	0.000149583
Gh_D12G2679	121.65	1.72229	0.253633	6.7905	1.12e-11	1.68e-10
Gh_D02G0785	21.2603	1.72193	0.489663	3.51656	0.000437171	0.00196412
Gh_D12G1541	191.458	1.72187	0.20208	8.52075	1.59e-17	4.17e-16
Gh_D13G1764	63.0807	1.72157	0.353653	4.86797	1.13e-06	8.59e-06
Gh_A03G1610	12.4224	1.72066	0.49753	3.45841	0.000543366	0.0023784
Gh_A05G2615	241.645	1.72019	0.236945	7.25984	3.88e-13	6.81e-12
Gh_A08G0935	81.7039	1.71862	0.259446	6.62418	3.49e-11	4.92e-10
Gh_D11G2525	2531.6	1.71819	0.148356	11.5815	5.11e-31	3.33e-29
Gh_A10G0134	114.166	1.71769	0.430165	3.99308	6.52e-05	0.000354927
Gh_A04G0003	111.733	1.71677	0.24676	6.95724	3.47e-12	5.54e-11
Gh_A02G1496	32.6207	1.7165	0.429833	3.99341	6.51e-05	0.00035455
Gh_A07G1314	7.84104	1.71551	0.515799	3.32593	0.000881254	0.00365145
Gh_A05G0037	145.18	1.71528	0.415786	4.12538	3.7e-05	0.000212054
Gh_D07G2432	42.4134	1.71446	0.473789	3.61861	0.000296185	0.00138932
Gh_A05G3825	476.502	1.71352	0.173214	9.89247	4.49e-23	1.76e-21
Gh_D05G0032	68.063	1.71232	0.258308	6.62901	3.38e-11	4.77e-10
Gh_A08G2483	724.144	1.71184	0.197512	8.66698	4.44e-18	1.21e-16
Gh_A13G0470	46.0461	1.71162	0.49509	3.45719	0.000545838	0.00238782
Gh_D05G1128	45.4886	1.70851	0.368294	4.63899	3.5e-06	2.45e-05
Gh_A03G1508	86.9412	1.7079	0.250665	6.81348	9.53e-12	1.45e-10
Gh_D05G1030	399.806	1.70703	0.173431	9.84269	7.37e-23	2.86e-21
Gh_A06G0016	69.5145	1.70638	0.251036	6.79733	1.07e-11	1.61e-10
Gh_D10G1703	86.2104	1.7061	0.478464	3.56578	0.00036277	0.00166491
Gh_A01G2040	59.7591	1.70593	0.352267	4.8427	1.28e-06	9.66e-06
Gh_A07G1649	8.70518	1.70533	0.499234	3.41589	0.000635749	0.0027361
Gh_A05G0745	117.667	1.70498	0.262385	6.49802	8.14e-11	1.1e-09
Gh_D08G1499	191.935	1.70452	0.179557	9.49291	2.25e-21	7.85e-20
Gh_A09G0553	109.372	1.70299	0.265641	6.41089	1.45e-10	1.9e-09
Gh_A07G1840	21.5323	1.70292	0.428195	3.97698	6.98e-05	0.000377483
Gh_A12G1403	522.262	1.70194	0.174634	9.74575	1.92e-22	7.26e-21
Gh_A09G2488	435.894	1.70165	0.496612	3.42651	0.000611391	0.00264197
Gh_D11G0660	30.842	1.7009	0.400655	4.2453	2.18e-05	0.000131093
Gh_A11G0127	1832.35	1.7009	0.172147	9.88048	5.06e-23	1.97e-21
Gh_A09G1921	30.5304	1.70066	0.41142	4.13364	3.57e-05	0.000205197
Gh_A07G1645	214.156	1.70019	0.22694	7.49178	6.79e-14	1.29e-12
Gh_D03G0578	17.7345	1.69988	0.466902	3.64076	0.000271834	0.00128721
Gh_D04G1032	17.9312	1.69967	0.40844	4.16137	3.16e-05	0.000183889
Gh_A05G3692	1417.28	1.69955	0.140107	12.1303	7.3e-34	5.55e-32
Gh_D07G2223	13.9944	1.69939	0.53733	3.16265	0.00156341	0.00606148
Gh_D02G1776	143.176	1.69904	0.413636	4.10757	4e-05	0.000227472
Gh_A10G0603	3041.71	1.69846	0.103715	16.3761	2.83e-60	5.98e-58
Gh_Sca114658G01	10.2435	1.69832	0.495149	3.42993	0.000603743	0.00261256
Gh_A04G0278	27.4974	1.69825	0.393177	4.3193	1.57e-05	9.68e-05
Gh_D11G3077	48.0422	1.69712	0.455331	3.72722	0.0001936	0.000951536
Gh_A11G1195	249.813	1.69575	0.250559	6.76786	1.31e-11	1.95e-10
Gh_A12G2480	34.3534	1.69551	0.393978	4.30356	1.68e-05	0.000103441
Gh_A05G3527	194.055	1.69494	0.174402	9.71859	2.51e-22	9.33e-21
Gh_A05G1616	82.182	1.69336	0.35639	4.75143	2.02e-06	1.47e-05
Gh_D13G2505	914.052	1.6929	0.119423	14.1757	1.3e-45	1.65e-43
Gh_A12G0673	177.533	1.6927	0.253827	6.66871	2.58e-11	3.71e-10
Gh_D12G0538	31.1365	1.69223	0.38968	4.34261	1.41e-05	8.79e-05
Gh_D10G2442	204.127	1.692	0.199802	8.46839	2.49e-17	6.44e-16
Gh_A05G2784	337.019	1.69161	0.184534	9.16694	4.87e-20	1.55e-18
Gh_D12G1248	12.3146	1.69147	0.530328	3.18948	0.00142527	0.00558592
Gh_A12G1858	15.2912	1.69115	0.49678	3.40423	0.00066352	0.00284001
Gh_D12G1393	1118.24	1.69098	0.242565	6.97122	3.14e-12	5.04e-11
Gh_A12G0375	153.568	1.69079	0.306551	5.51553	3.48e-08	3.37e-07
Gh_D08G0048	528.475	1.69046	0.408341	4.13981	3.48e-05	0.000200272
Gh_D06G0399	464.818	1.68923	0.280897	6.0137	1.81e-09	2.09e-08
Gh_A03G1592	39.7462	1.68909	0.392353	4.30501	1.67e-05	0.000102837
Gh_A13G0846	404.076	1.68906	0.260747	6.47778	9.31e-11	1.25e-09
Gh_D10G0491	123.987	1.68859	0.509881	3.31173	0.00092721	0.00381873
Gh_A05G3404	816.107	1.68827	0.205807	8.20315	2.34e-16	5.57e-15
Gh_A09G0673	15.0307	1.68709	0.52466	3.21559	0.00130178	0.00515972
Gh_A07G0483	60.4815	1.68688	0.304241	5.54455	2.95e-08	2.88e-07
Gh_D02G1278	31.6473	1.68686	0.392569	4.29699	1.73e-05	0.000106146
Gh_D01G2263	1318.81	1.6855	0.343776	4.90289	9.44e-07	7.29e-06
Gh_D12G2395	31.4666	1.68497	0.396075	4.25417	2.1e-05	0.000126391
Gh_A09G1061	30.4846	1.68472	0.45887	3.67146	0.000241166	0.00115862
Gh_D06G0576	2582.24	1.68456	0.243251	6.92519	4.35e-12	6.86e-11
Gh_D11G0485	21.9707	1.68389	0.458172	3.67523	0.000237636	0.00114342
Gh_A09G0621	5.59921	1.68353	0.532282	3.16286	0.00156228	0.00605751
Gh_A09G1107	2520.76	1.68317	0.146045	11.525	9.87e-31	6.32e-29
Gh_A09G1156	65.2553	1.68316	0.280541	5.99969	1.98e-09	2.27e-08
Gh_D06G1593	39400.1	1.68257	0.282606	5.95376	2.62e-09	2.94e-08
Gh_A09G0256	9.67769	1.68236	0.525078	3.20402	0.00135522	0.0053427
Gh_A06G1614	12.1559	1.68186	0.5205	3.23124	0.00123255	0.00491379
Gh_A05G3908	483.884	1.68158	0.167557	10.0359	1.06e-23	4.35e-22
Gh_A12G1738	9.4805	1.68136	0.49797	3.37642	0.000734348	0.00310543
Gh_D06G0758	70.287	1.68129	0.48456	3.46972	0.000521004	0.00229161
Gh_D08G2548	419.228	1.6811	0.196807	8.54187	1.32e-17	3.49e-16
Gh_D08G1489	182.727	1.68101	0.254373	6.60845	3.88e-11	5.44e-10
Gh_A05G2520	3.35966	1.67969	0.533147	3.15053	0.00162977	0.00628439
Gh_A07G1686	8.13971	1.67957	0.505032	3.32567	0.000882065	0.00365379
Gh_D09G1732	13.4515	1.67934	0.474887	3.53629	0.000405787	0.0018395
Gh_D08G1143	17.5256	1.67911	0.446183	3.76327	0.000167703	0.000836619
Gh_A08G0342	32.8684	1.67895	0.343334	4.89014	1.01e-06	7.74e-06
Gh_D09G1883	31.2304	1.67857	0.384853	4.36159	1.29e-05	8.12e-05
Gh_D05G2482	412.903	1.6785	0.176722	9.49795	2.14e-21	7.49e-20
Gh_D07G1491	18.6222	1.67768	0.505017	3.32202	0.000893683	0.00369471
Gh_D05G2488	9.85945	1.67761	0.528756	3.17275	0.00151005	0.00588103
Gh_D13G1101	76.8135	1.67729	0.46687	3.59262	0.000327365	0.00151787
Gh_D13G1758	23.6572	1.67722	0.420438	3.98923	6.63e-05	0.000360015
Gh_A09G1544	209.136	1.67707	0.202756	8.27139	1.32e-16	3.22e-15
Gh_A05G4020	130.414	1.67614	0.232163	7.21968	5.21e-13	9.02e-12
Gh_A12G1055	33.6851	1.6751	0.409065	4.09494	4.22e-05	0.000239117
Gh_D07G1878	33.6194	1.67499	0.443064	3.78047	0.000156533	0.000786299
Gh_Sca196225G01	7.63061	1.67437	0.531369	3.15105	0.00162683	0.00627425
Gh_D01G1842	135.649	1.67433	0.281948	5.93843	2.88e-09	3.22e-08
Gh_A11G3288	109.527	1.67225	0.22936	7.29095	3.08e-13	5.48e-12
Gh_D09G0245	61.6087	1.67217	0.381422	4.38405	1.16e-05	7.38e-05
Gh_D07G0157	938.826	1.672	0.227675	7.34377	2.08e-13	3.77e-12
Gh_A03G0372	125.936	1.67158	0.263971	6.33242	2.41e-10	3.09e-09
Gh_D06G1750	391.118	1.67108	0.220074	7.59327	3.12e-14	6.11e-13
Gh_D10G0981	372.118	1.67094	0.472163	3.53891	0.000401782	0.00182468
Gh_D11G1213	27.9869	1.67087	0.451721	3.6989	0.000216533	0.00105218
Gh_D10G0044	1449.68	1.67078	0.196722	8.4931	2.01e-17	5.24e-16
Gh_A10G0779	418.202	1.67077	0.487865	3.42466	0.000615562	0.00265844
Gh_A07G0229	8.80076	1.66911	0.48433	3.44623	0.000568467	0.00247643
Gh_D04G0129	69.8623	1.66901	0.265684	6.28192	3.34e-10	4.2e-09
Gh_D08G2559	136.322	1.66872	0.265401	6.28756	3.22e-10	4.06e-09
Gh_A07G2284	24.022	1.66845	0.372043	4.48456	7.31e-06	4.82e-05
Gh_D01G2236	197.239	1.66812	0.377276	4.42147	9.8e-06	6.31e-05
Gh_A02G1622	351.832	1.6678	0.170112	9.8041	1.08e-22	4.16e-21
Gh_D02G1825	161.535	1.66706	0.216499	7.70005	1.36e-14	2.77e-13
Gh_A05G0133	32.0206	1.66619	0.344969	4.82998	1.37e-06	1.03e-05
Gh_D09G1543	155.742	1.66496	0.367602	4.52925	5.92e-06	3.97e-05
Gh_D08G2247	70.85	1.66488	0.310839	5.35608	8.5e-08	7.79e-07
Gh_A09G1157	119.528	1.66474	0.250536	6.64469	3.04e-11	4.33e-10
Gh_D02G0598	1013.47	1.66432	0.39704	4.19182	2.77e-05	0.000162963
Gh_A07G1662	33.2031	1.66411	0.362661	4.5886	4.46e-06	3.07e-05
Gh_A08G1647	441.392	1.66389	0.49563	3.35712	0.000787581	0.0033033
Gh_D12G0168	41.7136	1.66389	0.322148	5.16499	2.4e-07	2.05e-06
Gh_D06G2208	228.397	1.66343	0.328761	5.05971	4.2e-07	3.45e-06
Gh_D02G0434	29.0567	1.66329	0.474609	3.50454	0.00045739	0.00204462
Gh_D05G2207	107.986	1.66318	0.362826	4.58396	4.56e-06	3.13e-05
Gh_A11G1668	109.444	1.66282	0.2744	6.05983	1.36e-09	1.59e-08
Gh_D07G1199	765.282	1.66183	0.146766	11.3231	1.01e-29	6.13e-28
Gh_A07G1672	55.4313	1.66155	0.403068	4.12227	3.75e-05	0.000214665
Gh_D13G1593	39.3682	1.6607	0.37843	4.38839	1.14e-05	7.26e-05
Gh_D03G0843	86.5472	1.65992	0.289548	5.7328	9.88e-09	1.03e-07
Gh_A10G1435	67.1066	1.65913	0.32369	5.12569	2.96e-07	2.49e-06
Gh_A11G1959	16.6415	1.65911	0.492546	3.36845	0.000755929	0.00318425
Gh_D08G0051	335.127	1.65901	0.473299	3.50521	0.000456239	0.00203992
Gh_D07G1726	280.468	1.65901	0.447506	3.70724	0.000209529	0.00102114
Gh_D10G0829	400.894	1.65897	0.170297	9.74163	2e-22	7.54e-21
Gh_A03G0438	444.272	1.65891	0.432841	3.8326	0.000126796	0.000648636
Gh_D06G2283	5645.95	1.65801	0.212979	7.78481	6.98e-15	1.46e-13
Gh_A09G1771	219.632	1.6574	0.299073	5.5418	2.99e-08	2.92e-07
Gh_A02G1233	46.7547	1.65729	0.325252	5.0954	3.48e-07	2.89e-06
Gh_A04G0539	294.37	1.65711	0.189694	8.73569	2.42e-18	6.76e-17
Gh_A11G3103	27.2572	1.65709	0.412377	4.01838	5.86e-05	0.000322259
Gh_A10G1707	310.504	1.6568	0.282805	5.85846	4.67e-09	5.08e-08
Gh_A03G1123	138.495	1.65678	0.235119	7.04654	1.83e-12	3.02e-11
Gh_A13G0185	298.941	1.65675	0.249201	6.64824	2.97e-11	4.23e-10
Gh_A08G1934	63.4489	1.65606	0.302637	5.47209	4.45e-08	4.23e-07
Gh_D10G1527	72.6191	1.65589	0.267789	6.18356	6.27e-10	7.63e-09
Gh_D02G0375	180.633	1.65553	0.310264	5.33587	9.51e-08	8.67e-07
Gh_A11G2215	3.68441	1.65436	0.526504	3.14217	0.001677	0.00644032
Gh_A10G0569	518.512	1.6538	0.138709	11.9228	9.01e-33	6.48e-31
Gh_A05G3034	19.3813	1.65343	0.446155	3.70595	0.000210598	0.00102593
Gh_A07G1100	748.008	1.6531	0.153939	10.7387	6.7e-27	3.44e-25
Gh_D08G1958	78.3994	1.65306	0.276124	5.98665	2.14e-09	2.44e-08
Gh_D10G1638	89.5899	1.65277	0.335898	4.92044	8.63e-07	6.71e-06
Gh_A12G2435	295.031	1.6527	0.183572	9.00298	2.2e-19	6.66e-18
Gh_D12G0796	26.502	1.65232	0.371308	4.45001	8.59e-06	5.58e-05
Gh_A07G0072	19.8453	1.65195	0.472301	3.49766	0.000469355	0.00209166
Gh_D02G0305	1147.74	1.65156	0.172308	9.58491	9.25e-22	3.31e-20
Gh_D11G3353	162.51	1.65145	0.230376	7.1685	7.58e-13	1.29e-11
Gh_D08G1979	323.538	1.6514	0.502519	3.28625	0.0010153	0.00413747
Gh_A12G0183	20.5157	1.65091	0.522938	3.15699	0.00159409	0.00616597
Gh_D05G1209	22.1072	1.64995	0.423041	3.90021	9.61e-05	0.000505161
Gh_A10G0931	91.5947	1.64969	0.318877	5.17342	2.3e-07	1.96e-06
Gh_A05G1454	324.218	1.64871	0.139598	11.8104	3.45e-32	2.4e-30
Gh_D09G0787	58.8689	1.64854	0.345578	4.77039	1.84e-06	1.35e-05
Gh_A08G0932	239.845	1.64823	0.212514	7.75588	8.77e-15	1.82e-13
Gh_D08G1987	23.9678	1.64818	0.411984	4.00059	6.32e-05	0.000345084
Gh_D08G0751	664.997	1.64779	0.503172	3.2748	0.00105738	0.00429163
Gh_D02G0452	54.3613	1.64732	0.339573	4.85115	1.23e-06	9.3e-06
Gh_D02G0915	66.6377	1.64725	0.281597	5.84965	4.93e-09	5.35e-08
Gh_A03G1252	27.6832	1.64588	0.481734	3.41657	0.00063415	0.00273099
Gh_A09G0600	4.71554	1.64444	0.528957	3.10883	0.00187829	0.00710777
Gh_D06G1634	372.511	1.64418	0.19379	8.48435	2.17e-17	5.64e-16
Gh_D10G1797	234.066	1.64351	0.240661	6.82914	8.54e-12	1.3e-10
Gh_Sca005987G03	49.8419	1.64346	0.412952	3.97979	6.9e-05	0.000373556
Gh_D08G0136	84.0647	1.64303	0.287932	5.7063	1.15e-08	1.19e-07
Gh_A05G3189	126.022	1.64199	0.257819	6.36878	1.91e-10	2.47e-09
Gh_A11G1384	45.0858	1.64186	0.304772	5.38718	7.16e-08	6.63e-07
Gh_A13G0693	387.091	1.6417	0.208343	7.87983	3.28e-15	7.08e-14
Gh_D12G0992	33.3479	1.64142	0.36144	4.54133	5.59e-06	3.77e-05
Gh_D11G1586	400.868	1.64141	0.21755	7.54497	4.52e-14	8.73e-13
Gh_A05G1011	19.7401	1.64121	0.422781	3.88193	0.000103629	0.000540103
Gh_A03G1141	69.2627	1.64066	0.331747	4.94551	7.59e-07	5.97e-06
Gh_D11G2022	74.172	1.63978	0.434347	3.77528	0.000159829	0.000801365
Gh_D12G1767	29.0231	1.63881	0.383307	4.27544	1.91e-05	0.000115915
Gh_D10G1362	164.661	1.63857	0.269308	6.08437	1.17e-09	1.38e-08
Gh_A09G1255	12.4964	1.63838	0.443048	3.69797	0.000217329	0.00105535
Gh_A13G2241	541.254	1.63715	0.163331	10.0235	1.2e-23	4.93e-22
Gh_D05G0244	80.6073	1.63703	0.290157	5.64188	1.68e-08	1.7e-07
Gh_D12G2762	36.9587	1.63676	0.344577	4.75005	2.03e-06	1.48e-05
Gh_D09G1791	276.851	1.63662	0.177146	9.23883	2.49e-20	8.11e-19
Gh_D13G0746	51.7322	1.63658	0.315286	5.19079	2.09e-07	1.8e-06
Gh_D11G1667	330.463	1.63544	0.183609	8.9072	5.23e-19	1.54e-17
Gh_A09G1182	267.48	1.63509	0.242344	6.74695	1.51e-11	2.23e-10
Gh_A09G1434	1482.34	1.6346	0.120637	13.5497	7.95e-42	8.72e-40
Gh_D08G0037	849.573	1.63451	0.485795	3.36462	0.000766504	0.00322446
Gh_D04G1143	445.708	1.63443	0.185538	8.80915	1.26e-18	3.6e-17
Gh_A05G1456	15.7944	1.63298	0.457176	3.57187	0.000354437	0.0016317
Gh_A04G0701	62.4036	1.63239	0.291939	5.59155	2.25e-08	2.23e-07
Gh_D08G0414	1511.76	1.63221	0.437441	3.73126	0.000190526	0.000937744
Gh_D04G0289	240.188	1.63194	0.492459	3.31386	0.000920181	0.00379293
Gh_D03G1730	5.03557	1.6319	0.531676	3.06935	0.00214524	0.00800095
Gh_D13G2449	14.0082	1.6317	0.483167	3.37709	0.000732584	0.00309899
Gh_A05G1986	289.505	1.63126	0.181133	9.00587	2.14e-19	6.5e-18
Gh_A13G1985	702.87	1.6311	0.487946	3.34278	0.000829431	0.0034591
Gh_D06G1831	323.411	1.63044	0.212586	7.66954	1.73e-14	3.47e-13
Gh_A10G1745	887.242	1.63027	0.117906	13.8268	1.76e-43	2.05e-41
Gh_A06G0708	1831.99	1.63022	0.120724	13.5037	1.49e-41	1.61e-39
Gh_D09G0337	167.996	1.62972	0.249756	6.52525	6.79e-11	9.26e-10
Gh_D05G3640	31.5969	1.62961	0.402634	4.04737	5.18e-05	0.000287734
Gh_D10G0497	292.248	1.62899	0.476842	3.4162	0.000635005	0.00273349
Gh_A05G2079	23.0783	1.62888	0.395625	4.11724	3.83e-05	0.000218975
Gh_D10G1678	1716.59	1.62886	0.142066	11.4655	1.97e-30	1.24e-28
Gh_D01G0500	75.1011	1.62885	0.342627	4.754	1.99e-06	1.46e-05
Gh_A07G2312	218.893	1.62773	0.23734	6.85823	6.97e-12	1.08e-10
Gh_A11G2479	155.19	1.62771	0.32059	5.07724	3.83e-07	3.17e-06
Gh_D08G2213	351.854	1.62703	0.494188	3.29232	0.000993643	0.00405976
Gh_D11G0865	3.85441	1.62638	0.477073	3.40909	0.000651809	0.00279793
Gh_D02G0048	16.9131	1.62573	0.466775	3.4829	0.000496005	0.00219743
Gh_A07G2132	89.3765	1.62569	0.344803	4.71482	2.42e-06	1.74e-05
Gh_A11G1010	171.681	1.62534	0.240644	6.75415	1.44e-11	2.13e-10
Gh_A06G1081	339.672	1.62521	0.175649	9.25257	2.19e-20	7.15e-19
Gh_A02G0985	420.586	1.62444	0.13383	12.138	6.64e-34	5.06e-32
Gh_A04G1165	12.939	1.62423	0.44929	3.61511	0.000300218	0.00140624
Gh_D04G0410	3.14965	1.62324	0.462249	3.51162	0.000445389	0.00199607
Gh_A07G1964	28.5988	1.62323	0.431483	3.76198	0.000168572	0.000840321
Gh_A08G1192	14.406	1.62198	0.437096	3.71081	0.0002066	0.0010086
Gh_D05G0736	11.8263	1.62189	0.487724	3.32543	0.000882809	0.00365659
Gh_A06G1984	117.653	1.62115	0.242788	6.67723	2.44e-11	3.52e-10
Gh_D10G1305	82.1599	1.62093	0.256719	6.31403	2.72e-10	3.45e-09
Gh_A12G1422	218.265	1.62071	0.206352	7.85411	4.03e-15	8.64e-14
Gh_A01G1291	487.816	1.62045	0.206018	7.86557	3.67e-15	7.9e-14
Gh_D02G2109	46.391	1.62007	0.296674	5.46076	4.74e-08	4.49e-07
Gh_A08G2115	945.644	1.61989	0.496619	3.26185	0.00110688	0.00446784
Gh_D05G0696	76.0585	1.61925	0.320139	5.05795	4.24e-07	3.48e-06
Gh_A01G2150	129.045	1.61899	0.198891	8.14005	3.95e-16	9.22e-15
Gh_D07G2028	22.886	1.61893	0.425481	3.80494	0.000141838	0.000719402
Gh_D07G1932	4.99688	1.61883	0.533259	3.03572	0.00239962	0.00881439
Gh_A05G2712	5.20307	1.61808	0.536855	3.01399	0.00257836	0.00938628
Gh_D05G0632	49.9339	1.61805	0.259155	6.24357	4.28e-10	5.31e-09
Gh_A10G0070	364.594	1.61771	0.216356	7.47705	7.6e-14	1.44e-12
Gh_D01G0003	194.203	1.61659	0.298668	5.41266	6.21e-08	5.81e-07
Gh_D06G2330	89.0172	1.61524	0.372296	4.33859	1.43e-05	8.94e-05
Gh_A06G1407	344.205	1.61495	0.181558	8.89492	5.85e-19	1.72e-17
Gh_A06G1661	17.1801	1.6149	0.524695	3.07779	0.0020854	0.00780616
Gh_D05G0886	13.6786	1.61476	0.482708	3.3452	0.000822235	0.00343391
Gh_Sca133480G01	7.99256	1.61386	0.526737	3.06387	0.00218492	0.00813112
Gh_D11G1526	22.0788	1.6137	0.413866	3.8991	9.66e-05	0.000507036
Gh_D05G0933	545.503	1.61352	0.180441	8.94207	3.82e-19	1.14e-17
Gh_D07G2187	239.106	1.61327	0.220237	7.32517	2.39e-13	4.3e-12
Gh_D05G0352	549.057	1.61248	0.355586	4.53472	5.77e-06	3.88e-05
Gh_A01G0328	467.561	1.61219	0.297064	5.4271	5.73e-08	5.37e-07
Gh_A06G0639	26.0376	1.61202	0.412718	3.90587	9.39e-05	0.000494664
Gh_D13G1587	55.656	1.61155	0.283926	5.67595	1.38e-08	1.41e-07
Gh_A08G0014	380.429	1.61138	0.410587	3.92459	8.69e-05	0.000460873
Gh_A03G0625	201.944	1.61131	0.380755	4.23188	2.32e-05	0.000138527
Gh_D11G2777	47.0288	1.61128	0.324471	4.96586	6.84e-07	5.42e-06
Gh_A05G3551	211.215	1.61012	0.455655	3.53364	0.000409884	0.00185624
Gh_D10G2628	482.747	1.61003	0.134852	11.9393	7.39e-33	5.34e-31
Gh_D09G1162	59.896	1.60922	0.326133	4.93423	8.05e-07	6.29e-06
Gh_D01G1318	16.4271	1.60773	0.463161	3.47121	0.000518113	0.00228094
Gh_A10G0825	61.4319	1.6076	0.299379	5.36977	7.88e-08	7.26e-07
Gh_D02G0449	109.765	1.60758	0.406611	3.95361	7.7e-05	0.000412633
Gh_D11G1562	1367.74	1.60746	0.16685	9.63421	5.73e-22	2.09e-20
Gh_D10G2315	39.8617	1.60741	0.287985	5.58158	2.38e-08	2.36e-07
Gh_D11G2985	42.409	1.60712	0.369778	4.34617	1.39e-05	8.66e-05
Gh_D11G0557	56.0699	1.60708	0.30294	5.30492	1.13e-07	1.01e-06
Gh_D05G2793	15.439	1.60701	0.479073	3.35442	0.000795316	0.0033306
Gh_D07G1906	485.128	1.60687	0.238375	6.74093	1.57e-11	2.32e-10
Gh_D04G0470	42.9295	1.60684	0.399131	4.02583	5.68e-05	0.000313261
Gh_D05G2330	74.4764	1.60664	0.280493	5.72789	1.02e-08	1.06e-07
Gh_D07G1832	5152.56	1.60637	0.188761	8.51009	1.74e-17	4.55e-16
Gh_D01G1829	5.49131	1.60605	0.527497	3.04466	0.00232942	0.00858994
Gh_A13G1806	139.267	1.60596	0.382924	4.19393	2.74e-05	0.000161661
Gh_D02G1189	17.1905	1.60555	0.426489	3.76457	0.000166835	0.000832775
Gh_A13G1743	55.5551	1.60513	0.307149	5.22591	1.73e-07	1.51e-06
Gh_A03G1649	43.0297	1.60497	0.3392	4.73164	2.23e-06	1.62e-05
Gh_D08G0089	29.9561	1.60466	0.441989	3.63054	0.000282834	0.00133405
Gh_D02G0593	77.6966	1.60445	0.262439	6.11363	9.74e-10	1.16e-08
Gh_A12G1114	41.5163	1.60411	0.337486	4.75313	2e-06	1.46e-05
Gh_A07G1883	188.314	1.60344	0.201355	7.96326	1.68e-15	3.7e-14
Gh_A11G2213	50.8152	1.60322	0.297201	5.39441	6.87e-08	6.39e-07
Gh_A03G1341	84.8688	1.60276	0.457963	3.49975	0.000465691	0.00207782
Gh_A08G0061	4.62598	1.60258	0.535616	2.99203	0.00277128	0.00999153
Gh_A01G1664	980.691	1.60237	0.121261	13.2142	7.26e-40	7.23e-38
Gh_D03G0490	240.182	1.60199	0.153793	10.4165	2.08e-25	9.72e-24
Gh_D05G0227	543.715	1.60172	0.203019	7.88947	3.03e-15	6.57e-14
Gh_D04G1393	5.66778	1.60162	0.529783	3.02316	0.0025015	0.00914573
Gh_A13G1172	470.185	1.60142	0.19025	8.41743	3.85e-17	9.8e-16
Gh_A05G1633	150.152	1.60009	0.284575	5.62275	1.88e-08	1.89e-07
Gh_D10G0285	8.69501	1.60005	0.523742	3.05503	0.00225041	0.00833679
Gh_A01G0582	24.8114	1.59968	0.454519	3.5195	0.000432364	0.00194462
Gh_A11G1058	38.8433	1.59922	0.398706	4.01102	6.05e-05	0.000331407
Gh_D03G0985	1007.5	1.59893	0.139816	11.436	2.76e-30	1.73e-28
Gh_D09G2381	10.4163	1.5989	0.527343	3.032	0.00242939	0.0089122
Gh_D04G0929	74.7951	1.59873	0.311403	5.13395	2.84e-07	2.39e-06
Gh_D13G2550	15902.1	1.59856	0.145523	10.9849	4.52e-28	2.5e-26
Gh_A04G0509	221.253	1.59819	0.189014	8.45537	2.78e-17	7.17e-16
Gh_A09G1980	45.6176	1.59767	0.440721	3.62513	0.000288821	0.00135895
Gh_D07G1966	5.35955	1.59715	0.534673	2.98716	0.00281585	0.0101314
Gh_D04G0117	128.438	1.59673	0.48089	3.32037	0.000898993	0.00371474
Gh_A03G0734	36.8851	1.59648	0.384063	4.15681	3.23e-05	0.000187163
Gh_A07G2240	9.63515	1.5954	0.488949	3.26293	0.00110269	0.00445392
Gh_D11G3019	56.4778	1.5952	0.305541	5.22091	1.78e-07	1.55e-06
Gh_A07G1573	44.886	1.5949	0.330962	4.81899	1.44e-06	1.08e-05
Gh_A05G1991	168.804	1.59368	0.24641	6.46759	9.96e-11	1.33e-09
Gh_A09G1303	125.653	1.59339	0.237845	6.69929	2.09e-11	3.04e-10
Gh_A08G1957	50.991	1.59282	0.456169	3.49174	0.00047989	0.00213406
Gh_D10G1472	157.71	1.59221	0.189099	8.42001	3.76e-17	9.59e-16
Gh_D02G1891	4010.14	1.59207	0.297858	5.34506	9.04e-08	8.26e-07
Gh_A08G1171	146.177	1.59155	0.218789	7.27434	3.48e-13	6.15e-12
Gh_A06G1479	183.541	1.59113	0.188419	8.44461	3.05e-17	7.83e-16
Gh_A07G1559	239.709	1.59109	0.459905	3.45961	0.000540959	0.00236873
Gh_D10G2623	199.368	1.59044	0.210055	7.57154	3.69e-14	7.18e-13
Gh_D10G0714	24.0337	1.58938	0.476083	3.33844	0.000842489	0.00350841
Gh_D05G0230	9.09218	1.58905	0.530149	2.99737	0.00272317	0.00983955
Gh_A12G1468	828.234	1.58795	0.196686	8.0735	6.83e-16	1.56e-14
Gh_D06G0093	4.51012	1.58788	0.534789	2.96918	0.002986	0.0106739
Gh_A08G0173	2596.1	1.58785	0.1397	11.3662	6.16e-30	3.8e-28
Gh_D07G1877	266.32	1.5877	0.346143	4.58684	4.5e-06	3.09e-05
Gh_A05G2753	12.603	1.58769	0.522209	3.04033	0.00236317	0.008695
Gh_D01G1138	73.1194	1.58746	0.269011	5.90109	3.61e-09	3.99e-08
Gh_D07G1751	67.293	1.58735	0.300767	5.27768	1.31e-07	1.16e-06
Gh_A13G0401	12.4187	1.58691	0.457324	3.46999	0.000520477	0.00228983
Gh_A02G0797	10.3999	1.58537	0.53763	2.94882	0.00318995	0.0112991
Gh_D07G0449	402.057	1.58526	0.44924	3.52876	0.000417519	0.00188493
Gh_D04G1686	59.7241	1.58522	0.273939	5.78677	7.18e-09	7.61e-08
Gh_D02G1738	182.085	1.58509	0.26851	5.90328	3.56e-09	3.94e-08
Gh_D08G1664	35.7511	1.5844	0.334718	4.73353	2.21e-06	1.6e-05
Gh_A13G0644	80.4349	1.58419	0.298699	5.30364	1.14e-07	1.02e-06
Gh_D11G0181	5082.54	1.58395	0.14808	10.6966	1.06e-26	5.32e-25
Gh_D02G1715	91.2969	1.58317	0.269766	5.86869	4.39e-09	4.8e-08
Gh_D11G2800	109.703	1.583	0.320293	4.94236	7.72e-07	6.05e-06
Gh_D05G0459	33.182	1.58237	0.389024	4.06755	4.75e-05	0.000266017
Gh_A06G2011	23.1026	1.58204	0.500758	3.1593	0.00158148	0.00612198
Gh_D05G0755	866.413	1.58204	0.20636	7.66638	1.77e-14	3.56e-13
Gh_D10G0326	64.2997	1.58162	0.284842	5.55261	2.81e-08	2.76e-07
Gh_A10G0196	155.532	1.58132	0.203967	7.75283	8.99e-15	1.86e-13
Gh_A02G0883	166.847	1.58042	0.187431	8.43202	3.4e-17	8.7e-16
Gh_A13G0064	147.413	1.57998	0.418915	3.7716	0.000162203	0.000811628
Gh_D04G0596	84.4102	1.57997	0.240758	6.56245	5.29e-11	7.29e-10
Gh_A13G1440	12.9863	1.57948	0.507901	3.10982	0.00187199	0.00708665
Gh_A02G0955	921.672	1.57948	0.227018	6.95752	3.46e-12	5.54e-11
Gh_A08G2509	1681.14	1.57941	0.173497	9.10338	8.76e-20	2.74e-18
Gh_D13G1403	549.584	1.57856	0.454455	3.47353	0.000513664	0.0022632
Gh_A12G1949	121.374	1.57853	0.376944	4.1877	2.82e-05	0.000165676
Gh_A08G1990	240.847	1.57758	0.233472	6.75701	1.41e-11	2.09e-10
Gh_D05G1332	314.385	1.57683	0.335115	4.70535	2.53e-06	1.82e-05
Gh_D09G1270	54.4547	1.57673	0.394217	3.99964	6.34e-05	0.000346258
Gh_D03G1118	9.96417	1.57623	0.490381	3.21429	0.00130768	0.00518034
Gh_A05G0164	363.079	1.57585	0.291845	5.39963	6.68e-08	6.22e-07
Gh_A05G2932	280.142	1.57516	0.235395	6.69156	2.21e-11	3.2e-10
Gh_A07G0093	69.7009	1.57513	0.328241	4.79871	1.6e-06	1.19e-05
Gh_D01G0252	26.1136	1.5751	0.365401	4.3106	1.63e-05	0.000100428
Gh_Sca127425G01	12.0234	1.57496	0.497085	3.16839	0.00153286	0.00595896
Gh_A02G0044	111.042	1.57484	0.241435	6.52284	6.9e-11	9.4e-10
Gh_D06G2039	362.631	1.57484	0.222874	7.06605	1.59e-12	2.63e-11
Gh_A05G2414	190.363	1.57461	0.23147	6.80263	1.03e-11	1.55e-10
Gh_Sca005400G01	88.7082	1.57417	0.306337	5.13869	2.77e-07	2.33e-06
Gh_D11G2312	19.3133	1.57366	0.433876	3.62698	0.000286761	0.00135048
Gh_A12G1931	624.731	1.5728	0.43139	3.64588	0.000266478	0.00126542
Gh_A07G2348	2466.03	1.57273	0.218994	7.18161	6.89e-13	1.18e-11
Gh_D07G0897	149.801	1.57216	0.222241	7.0741	1.5e-12	2.49e-11
Gh_A01G1618	13.0787	1.57211	0.408648	3.8471	0.000119526	0.000615201
Gh_D08G0021	330.214	1.57198	0.487773	3.22277	0.00126957	0.00504481
Gh_A09G1091	5.18818	1.57184	0.532487	2.95188	0.00315845	0.0112016
Gh_D12G0539	10.463	1.57169	0.473662	3.31817	0.000906081	0.00374129
Gh_D08G1277	18.984	1.5712	0.406755	3.86278	0.000112104	0.000580412
Gh_D05G3267	457.714	1.57088	0.249337	6.30023	2.97e-10	3.76e-09
Gh_A13G1584	78.6649	1.57077	0.229695	6.83848	8e-12	1.23e-10
Gh_D08G2555	89.1505	1.57003	0.23664	6.63469	3.25e-11	4.61e-10
Gh_A04G0933	36.4132	1.56985	0.364945	4.3016	1.7e-05	0.000104195
Gh_D13G2345	280.195	1.56967	0.178385	8.79932	1.38e-18	3.92e-17
Gh_A06G1867	118.778	1.56963	0.219261	7.1587	8.14e-13	1.38e-11
Gh_A12G0379	7.03828	1.56929	0.507419	3.0927	0.00198346	0.00746399
Gh_D13G0565	536.924	1.56841	0.226384	6.92811	4.27e-12	6.74e-11
Gh_D07G0457	1268.1	1.56831	0.349524	4.48699	7.22e-06	4.77e-05
Gh_D08G1314	79.8579	1.56702	0.296401	5.28683	1.24e-07	1.11e-06
Gh_A06G1285	129.643	1.56694	0.538715	2.90866	0.00362978	0.0126375
Gh_D10G0590	291.114	1.56686	0.238433	6.57149	4.98e-11	6.89e-10
Gh_A13G1002	9.68445	1.5667	0.514497	3.04511	0.00232597	0.00858093
Gh_A10G0450	352.067	1.56477	0.151227	10.3471	4.31e-25	1.97e-23
Gh_A07G1802	353.668	1.56431	0.245476	6.37253	1.86e-10	2.41e-09
Gh_A12G0266	125.838	1.56312	0.205555	7.60439	2.86e-14	5.63e-13
Gh_A03G0670	459.386	1.56287	0.181822	8.59558	8.28e-18	2.22e-16
Gh_D09G0472	1639.86	1.56261	0.219884	7.10652	1.19e-12	1.99e-11
Gh_D04G0087	18.1869	1.5626	0.495492	3.15363	0.00161255	0.00622606
Gh_D06G0235	13.9298	1.5622	0.490316	3.18611	0.00144202	0.00564488
Gh_A05G0717	1092.86	1.56199	0.503149	3.10442	0.00190654	0.00720275
Gh_D04G0463	216.963	1.5617	0.180075	8.6725	4.23e-18	1.16e-16
Gh_D06G1290	8.62412	1.56087	0.527205	2.96065	0.00306986	0.010929
Gh_D02G0901	4.88935	1.56065	0.537041	2.90602	0.00366052	0.0127311
Gh_D11G2986	26.1822	1.56046	0.44098	3.53862	0.000402223	0.00182613
Gh_D05G2755	927.54	1.56013	0.15589	10.0079	1.41e-23	5.73e-22
Gh_D04G0994	92.6928	1.55946	0.308558	5.05402	4.33e-07	3.54e-06
Gh_A08G0525	1976.11	1.55943	0.113425	13.7486	5.19e-43	5.91e-41
Gh_D06G1488	98.2517	1.5593	0.249897	6.23978	4.38e-10	5.43e-09
Gh_A07G2143	40.4229	1.55902	0.383055	4.06997	4.7e-05	0.000263542
Gh_A09G0156	99.8012	1.5585	0.249809	6.23878	4.41e-10	5.46e-09
Gh_D12G0413	2.17797	1.55827	0.462367	3.37021	0.000751113	0.00316621
Gh_Sca078260G01	13.8439	1.55805	0.495583	3.14387	0.00166731	0.00640919
Gh_D13G0663	6.46368	1.55709	0.509344	3.05706	0.00223523	0.0082888
Gh_D09G1102	17.8316	1.55662	0.474061	3.28359	0.00102494	0.00417245
Gh_A05G3640	17.4644	1.55551	0.445714	3.48992	0.000483161	0.00214724
Gh_A13G1550	5820.36	1.5551	0.163707	9.49927	2.11e-21	7.4e-20
Gh_A06G1085	869.992	1.55468	0.191068	8.13681	4.06e-16	9.45e-15
Gh_D01G1581	58.2093	1.55396	0.448402	3.46555	0.000529148	0.00232273
Gh_A07G1729	19.4737	1.55344	0.457316	3.39686	0.000681634	0.0029094
Gh_A10G0229	13.2036	1.55237	0.476747	3.25617	0.00112925	0.00454763
Gh_D07G0212	1015.32	1.55213	0.213781	7.26037	3.86e-13	6.79e-12
Gh_D11G2749	182.376	1.55163	0.200052	7.75612	8.76e-15	1.82e-13
Gh_D08G0373	17.7252	1.55136	0.493182	3.14562	0.00165734	0.00637873
Gh_D09G1251	102.669	1.5513	0.198564	7.81261	5.6e-15	1.19e-13
Gh_A07G2354	3673.8	1.55043	0.176656	8.77652	1.69e-18	4.76e-17
Gh_A08G2273	21.9859	1.54995	0.445421	3.47975	0.000501881	0.00221917
Gh_A02G0424	7.74897	1.5496	0.533912	2.90235	0.00370372	0.0128543
Gh_A09G0649	169.417	1.5494	0.447034	3.46596	0.00052834	0.00231962
Gh_A10G1121	164.112	1.54857	0.207671	7.45686	8.86e-14	1.66e-12
Gh_D13G0248	469.134	1.548	0.116854	13.2473	4.68e-40	4.72e-38
Gh_A10G1074	13.2262	1.5478	0.510373	3.03269	0.00242382	0.0088945
Gh_D08G1268	57.6054	1.54684	0.325884	4.74658	2.07e-06	1.51e-05
Gh_D04G1863	184.632	1.54683	0.22732	6.80464	1.01e-11	1.53e-10
Gh_D06G2116	5328.1	1.54676	0.132151	11.7045	1.21e-31	8.12e-30
Gh_D08G2329	45.9471	1.54603	0.354329	4.36326	1.28e-05	8.06e-05
Gh_A02G0528	160.123	1.54601	0.174605	8.85435	8.42e-19	2.43e-17
Gh_A12G0749	53.2166	1.54584	0.320246	4.82703	1.39e-06	1.04e-05
Gh_D02G0428	90.9281	1.54532	0.322677	4.78905	1.68e-06	1.24e-05
Gh_D12G1968	634.875	1.54395	0.133121	11.5981	4.21e-31	2.76e-29
Gh_A11G0414	205.309	1.54361	0.311547	4.95467	7.25e-07	5.71e-06
Gh_A07G0514	294.096	1.54333	0.22874	6.74707	1.51e-11	2.23e-10
Gh_A05G3131	28.5071	1.54303	0.471992	3.26919	0.00107856	0.00436626
Gh_A07G0118	290.583	1.54291	0.217932	7.07978	1.44e-12	2.4e-11
Gh_A12G1925	607.727	1.54286	0.275422	5.60178	2.12e-08	2.11e-07
Gh_A12G2036	245.913	1.54278	0.158694	9.72177	2.44e-22	9.06e-21
Gh_A02G0263	74.126	1.54276	0.354326	4.35407	1.34e-05	8.38e-05
Gh_A04G0277	328.174	1.54243	0.162788	9.47506	2.67e-21	9.26e-20
Gh_A12G0700	767.293	1.54233	0.37064	4.16125	3.17e-05	0.000183966
Gh_A08G2169	224.384	1.54211	0.27728	5.56158	2.67e-08	2.62e-07
Gh_A11G0336	45.2865	1.54193	0.522801	2.94937	0.00318422	0.011284
Gh_A04G0905	50.3155	1.54179	0.282041	5.46656	4.59e-08	4.36e-07
Gh_D03G1209	262.232	1.54088	0.171508	8.98433	2.6e-19	7.85e-18
Gh_A12G2327	172.566	1.54074	0.179381	8.58919	8.76e-18	2.34e-16
Gh_A09G1639	36.4407	1.54007	0.336278	4.57975	4.66e-06	3.19e-05
Gh_A08G2180	1955.61	1.53999	0.214153	7.19106	6.43e-13	1.1e-11
Gh_D03G1271	50.4687	1.5395	0.326151	4.72021	2.36e-06	1.7e-05
Gh_Sca072684G01	58.067	1.53925	0.372462	4.13263	3.59e-05	0.000206024
Gh_A04G1192	30.2086	1.53781	0.307454	5.00176	5.68e-07	4.56e-06
Gh_A13G2138	317.794	1.53778	0.176738	8.70091	3.29e-18	9.1e-17
Gh_A11G2821	12.4956	1.53722	0.441351	3.483	0.000495832	0.00219709
Gh_A09G1096	28.5414	1.53692	0.385391	3.98796	6.66e-05	0.000361765
Gh_A08G2543	2643.24	1.53652	0.49549	3.10101	0.00192864	0.00727841
Gh_A10G0474	623.12	1.53645	0.505958	3.03671	0.00239173	0.00878921
Gh_A01G1751	37.1068	1.53614	0.348693	4.40542	1.06e-05	6.75e-05
Gh_D05G2499	142.09	1.5345	0.256701	5.97775	2.26e-09	2.57e-08
Gh_A05G3963	2553.25	1.53313	0.246816	6.21164	5.24e-10	6.43e-09
Gh_D11G0785	161.892	1.53234	0.210082	7.294	3.01e-13	5.36e-12
Gh_A04G0085	29.8828	1.53231	0.344933	4.44234	8.9e-06	5.77e-05
Gh_A09G1917	59.4843	1.53176	0.293039	5.22714	1.72e-07	1.5e-06
Gh_D07G0181	161.646	1.53163	0.235089	6.51511	7.26e-11	9.87e-10
Gh_D06G0144	400.48	1.53157	0.45649	3.35509	0.00079339	0.00332394
Gh_A11G1247	839.239	1.53124	0.247721	6.1813	6.36e-10	7.73e-09
Gh_D12G1852	22.5723	1.5306	0.455489	3.36035	0.00077845	0.00326894
Gh_D11G3177	35.9913	1.53049	0.34301	4.46195	8.12e-06	5.31e-05
Gh_A10G1547	167.932	1.53042	0.224742	6.80967	9.78e-12	1.48e-10
Gh_D07G2240	6.59562	1.53003	0.538212	2.8428	0.00447195	0.0151109
Gh_D04G0870	50.7007	1.52988	0.335545	4.55939	5.13e-06	3.48e-05
Gh_D01G0240	40.5079	1.5296	0.33958	4.5044	6.66e-06	4.42e-05
Gh_A09G0369	90.3257	1.52958	0.259959	5.8839	4.01e-09	4.4e-08
Gh_A13G2289	83.5893	1.52827	0.288488	5.2975	1.17e-07	1.05e-06
Gh_A10G0203	267.307	1.52778	0.148294	10.3023	6.88e-25	3.09e-23
Gh_A07G0523	90.0837	1.52714	0.337343	4.52695	5.98e-06	4.01e-05
Gh_A09G0152	280.696	1.5271	0.440275	3.46851	0.000523354	0.00230062
Gh_A07G0955	99.291	1.52688	0.424863	3.59382	0.000325859	0.00151174
Gh_A12G2087	151.649	1.52641	0.208487	7.32136	2.45e-13	4.42e-12
Gh_A12G1688	176.98	1.52601	0.183657	8.30902	9.65e-17	2.37e-15
Gh_A02G0532	1196.64	1.52597	0.391438	3.89836	9.68e-05	0.000508258
Gh_D05G0585	78.1892	1.52575	0.256566	5.94681	2.73e-09	3.06e-08
Gh_D12G0676	232.758	1.52512	0.221998	6.86996	6.42e-12	9.94e-11
Gh_D03G1031	159.844	1.52504	0.291079	5.23927	1.61e-07	1.41e-06
Gh_D03G1583	68.9024	1.525	0.310197	4.91622	8.82e-07	6.85e-06
Gh_D03G1059	33.8202	1.52347	0.408699	3.72761	0.000193303	0.000950196
Gh_D06G2233	692.67	1.5231	0.169738	8.97325	2.88e-19	8.64e-18
Gh_D06G0571	482.941	1.52272	0.138326	11.0082	3.49e-28	1.94e-26
Gh_D13G2381	222.597	1.52261	0.329833	4.61632	3.91e-06	2.71e-05
Gh_D07G0556	3173.81	1.52253	0.130512	11.6657	1.91e-31	1.27e-29
Gh_A07G2299	741.124	1.52241	0.203166	7.49346	6.71e-14	1.28e-12
Gh_D06G2112	16.0865	1.52188	0.51235	2.97039	0.00297425	0.0106364
Gh_D05G3812	148.803	1.52152	0.202828	7.50152	6.31e-14	1.2e-12
Gh_D06G2284	5458.84	1.52148	0.201773	7.54054	4.68e-14	9.02e-13
Gh_D05G0866	52.3024	1.52148	0.307577	4.94666	7.55e-07	5.94e-06
Gh_A05G3252	17.285	1.52123	0.51506	2.9535	0.00314196	0.011151
Gh_D01G2061	46.3286	1.52046	0.400097	3.80022	0.00014457	0.000732013
Gh_D01G0912	101.213	1.52003	0.266648	5.70051	1.19e-08	1.23e-07
Gh_Sca031901G01	26.9131	1.51953	0.377725	4.02284	5.75e-05	0.000316892
Gh_D09G0090	10.3494	1.51924	0.500383	3.03616	0.00239614	0.00880434
Gh_D03G1234	1003.99	1.51858	0.457671	3.31807	0.00090643	0.00374237
Gh_D13G0901	23.9239	1.51849	0.372353	4.07809	4.54e-05	0.000255351
Gh_A07G1270	674.077	1.51807	0.133815	11.3445	7.89e-30	4.82e-28
Gh_A12G1243	270.59	1.51804	0.182702	8.30887	9.66e-17	2.38e-15
Gh_A11G0413	43.6782	1.518	0.363961	4.17078	3.04e-05	0.000177131
Gh_Sca047995G01	17.6817	1.51788	0.43084	3.52308	0.000426565	0.00192095
Gh_A11G2457	403.001	1.51756	0.18468	8.21727	2.08e-16	4.97e-15
Gh_D02G0991	352.185	1.51715	0.153064	9.91187	3.7e-23	1.46e-21
Gh_D11G2183	29.8624	1.51649	0.526662	2.87943	0.00398398	0.0136778
Gh_D13G0200	207.682	1.51632	0.237756	6.37765	1.8e-10	2.34e-09
Gh_D09G1163	324.133	1.51597	0.238214	6.36389	1.97e-10	2.54e-09
Gh_D05G2652	38.6926	1.51594	0.522118	2.90345	0.00369079	0.0128206
Gh_A04G0577	59.1853	1.51565	0.339655	4.46233	8.11e-06	5.3e-05
Gh_A11G2943	170.781	1.51405	0.203875	7.42634	1.12e-13	2.08e-12
Gh_A05G2710	476.512	1.51393	0.163473	9.26109	2.02e-20	6.63e-19
Gh_A02G0718	42.3308	1.51386	0.326484	4.63685	3.54e-06	2.48e-05
Gh_D08G0647	29.8817	1.51382	0.349786	4.32784	1.51e-05	9.35e-05
Gh_A01G0758	12.8904	1.51359	0.47726	3.17142	0.00151696	0.00590447
Gh_A10G1002	16.7873	1.51351	0.445775	3.39523	0.0006857	0.00292449
Gh_A07G2150	17.2275	1.51319	0.45477	3.32736	0.000876718	0.00363391
Gh_A06G0630	19.7288	1.51285	0.471443	3.20899	0.00133204	0.00526246
Gh_D04G0082	178.273	1.51269	0.168537	8.9754	2.82e-19	8.49e-18
Gh_A08G1051	9.41516	1.50861	0.520637	2.89763	0.00375996	0.0130235
Gh_A07G0306	27.2617	1.50839	0.369293	4.08453	4.42e-05	0.000249141
Gh_D08G1640	228.117	1.50829	0.189941	7.94086	2.01e-15	4.41e-14
Gh_D09G0575	19.7718	1.50637	0.370346	4.06746	4.75e-05	0.000266097
Gh_D09G1336	59.6037	1.50558	0.310136	4.85458	1.21e-06	9.14e-06
Gh_A05G2392	106.328	1.50497	0.237671	6.33218	2.42e-10	3.09e-09
Gh_D02G0419	71.4125	1.50487	0.266619	5.64428	1.66e-08	1.68e-07
Gh_D09G0142	271.073	1.50487	0.461581	3.26025	0.00111312	0.00448968
Gh_D08G0634	41.9852	1.50397	0.343396	4.37968	1.19e-05	7.53e-05
Gh_A02G1195	3.21186	1.50349	0.536295	2.80348	0.00505543	0.0167805
Gh_D13G1037	202.117	1.50286	0.334446	4.49356	7e-06	4.63e-05
Gh_D12G2004	43.0925	1.50282	0.320762	4.68516	2.8e-06	1.99e-05
Gh_A08G1578	209.389	1.50256	0.290675	5.16919	2.35e-07	2.01e-06
Gh_D05G3310	244.681	1.5025	0.176352	8.51991	1.6e-17	4.19e-16
Gh_A08G2548	665.044	1.50246	0.472829	3.17761	0.00148496	0.00579243
Gh_A04G0751	242.249	1.50241	0.202739	7.4106	1.26e-13	2.33e-12
Gh_D05G3507	626.795	1.50161	0.267272	5.61829	1.93e-08	1.93e-07
Gh_A10G1371	1769.69	1.50121	0.171737	8.74133	2.3e-18	6.43e-17
Gh_A09G1169	184.463	1.5009	0.187999	7.98354	1.42e-15	3.16e-14
Gh_D08G0893	377.549	1.50089	0.14736	10.1852	2.31e-24	9.95e-23
Gh_A11G1953	73.0612	1.50029	0.460109	3.26073	0.00111128	0.00448405
Gh_D10G0498	640.498	1.49999	0.511908	2.93019	0.00338757	0.0119049
Gh_D07G2341	97.5083	1.49988	0.379181	3.95558	7.63e-05	0.000409506
Gh_A10G2039	13.4437	1.49946	0.523641	2.86352	0.00418959	0.0142857
Gh_A13G2026	21.1015	1.49827	0.516585	2.90033	0.00372766	0.0129246
Gh_D06G1632	3.43853	1.4981	0.535091	2.79971	0.00511487	0.016938
Gh_D02G0096	14.1602	1.49786	0.478112	3.13287	0.00173106	0.00662474
Gh_A11G0106	11.832	1.49744	0.446528	3.35351	0.000797937	0.0033404
Gh_D12G0289	9.60617	1.49737	0.489156	3.06112	0.00220507	0.00819128
Gh_D08G1061	462.786	1.49694	0.170933	8.75747	2e-18	5.62e-17
Gh_A07G1418	117.897	1.49641	0.231285	6.47	9.8e-11	1.31e-09
Gh_D12G2309	1417.99	1.49508	0.156075	9.57926	9.77e-22	3.48e-20
Gh_Sca068518G01	79.4055	1.49506	0.268907	5.55978	2.7e-08	2.65e-07
Gh_A11G0252	23.9821	1.49475	0.534072	2.79877	0.00512974	0.0169789
Gh_A13G2200	786.673	1.49449	0.129381	11.5511	7.29e-31	4.69e-29
Gh_A08G1686	13.7038	1.49444	0.508817	2.93709	0.00331311	0.0116791
Gh_A07G1465	196.793	1.49439	0.180696	8.27018	1.34e-16	3.25e-15
Gh_D09G0721	24.836	1.49426	0.373666	3.99893	6.36e-05	0.000347196
Gh_A06G1494	5.85191	1.49421	0.53791	2.77781	0.00547272	0.0179593
Gh_A04G1185	69.4655	1.49378	0.254243	5.8754	4.22e-09	4.62e-08
Gh_D04G0959	37.1614	1.49364	0.34358	4.3473	1.38e-05	8.62e-05
Gh_Sca004838G01	490.321	1.49359	0.163069	9.15927	5.22e-20	1.66e-18
Gh_D01G0995	79.2311	1.49269	0.375911	3.97086	7.16e-05	0.000386396
Gh_A03G0247	49.8024	1.49258	0.469708	3.17767	0.00148461	0.00579144
Gh_D10G1819	58.0879	1.49243	0.35881	4.15939	3.19e-05	0.000185289
Gh_A05G0716	323.682	1.49175	0.182838	8.15889	3.38e-16	7.93e-15
Gh_A02G0676	76.3693	1.49138	0.247313	6.03032	1.64e-09	1.9e-08
Gh_A01G1006	15.8249	1.4913	0.433096	3.44335	0.000574562	0.00250044
Gh_D02G1052	5.07387	1.49106	0.53656	2.77893	0.00545379	0.0179051
Gh_A03G0580	104.27	1.49093	0.255776	5.82905	5.57e-09	6.01e-08
Gh_A01G0978	10.4006	1.49049	0.500976	2.97517	0.00292828	0.0104902
Gh_A01G0308	312.38	1.49046	0.204045	7.3046	2.78e-13	4.98e-12
Gh_D08G0035	1858.36	1.49041	0.467815	3.1859	0.00144306	0.00564821
Gh_A10G1391	46.8517	1.49038	0.340233	4.38046	1.18e-05	7.5e-05
Gh_A12G1295	16.3066	1.48946	0.438626	3.39573	0.000684448	0.00292014
Gh_D02G1998	11.2597	1.48917	0.529497	2.81242	0.00491699	0.0163886
Gh_D11G1937	77.5623	1.48875	0.458871	3.24438	0.00117708	0.00471853
Gh_A09G1268	53.726	1.48854	0.43894	3.39121	0.000695837	0.00296172
Gh_A01G0542	221.743	1.48774	0.189304	7.85899	3.87e-15	8.32e-14
Gh_A11G0014	673.684	1.48709	0.155349	9.57259	1.04e-21	3.71e-20
Gh_A07G0760	6.57496	1.48702	0.536382	2.77232	0.00556587	0.0182308
Gh_A07G0384	149.995	1.48697	0.257902	5.76564	8.13e-09	8.59e-08
Gh_A10G1407	30.7592	1.48653	0.424943	3.49818	0.000468438	0.00208836
Gh_A04G0490	156.799	1.48617	0.171841	8.64853	5.22e-18	1.42e-16
Gh_A07G1896	424.195	1.48542	0.168023	8.8406	9.52e-19	2.74e-17
Gh_D08G1192	1384.18	1.48485	0.159397	9.31547	1.21e-20	4.03e-19
Gh_D13G0864	161.781	1.48433	0.205855	7.21054	5.57e-13	9.62e-12
Gh_D10G1874	233.002	1.48332	0.280839	5.28175	1.28e-07	1.14e-06
Gh_D12G2312	9.37231	1.48331	0.535609	2.76939	0.00561607	0.018376
Gh_D08G0034	2452.36	1.48326	0.473933	3.12967	0.00175	0.00668606
Gh_A11G0836	16.5347	1.48309	0.475824	3.11688	0.00182776	0.00694259
Gh_A01G0878	5.387	1.48285	0.531533	2.78976	0.00527477	0.0173883
Gh_D05G0260	61.3544	1.4821	0.49246	3.00959	0.00261604	0.00950669
Gh_A12G0431	251.874	1.48204	0.168677	8.78626	1.55e-18	4.39e-17
Gh_A07G0774	121.913	1.48183	0.392058	3.77963	0.000157061	0.00078875
Gh_Sca061013G01	5.6959	1.48145	0.514959	2.87683	0.00401696	0.0137815
Gh_A07G1039	22.5985	1.48087	0.369246	4.01053	6.06e-05	0.000332028
Gh_D11G1098	135.154	1.48075	0.22253	6.65417	2.85e-11	4.08e-10
Gh_A11G2809	63.716	1.48049	0.496469	2.98204	0.00286331	0.0102841
Gh_D01G1816	182.713	1.47964	0.26532	5.57681	2.45e-08	2.42e-07
Gh_Sca214344G01	3.02904	1.47929	0.534263	2.76885	0.00562548	0.018401
Gh_A13G0910	30.3948	1.47903	0.386858	3.82318	0.000131741	0.000672202
Gh_D08G1798	3.07957	1.4788	0.516018	2.86579	0.00415966	0.0141991
Gh_D13G1454	44.9881	1.47846	0.463865	3.18726	0.00143627	0.0056246
Gh_A13G0857	52.5961	1.47816	0.468612	3.15434	0.00160859	0.0062132
Gh_A02G0349	35.8888	1.47785	0.508015	2.90906	0.00362512	0.0126235
Gh_D12G0069	16.9797	1.47784	0.426124	3.46808	0.000524184	0.00230359
Gh_D09G1566	130.29	1.47767	0.295448	5.00146	5.69e-07	4.56e-06
Gh_A04G0416	494.105	1.47765	0.202528	7.29603	2.96e-13	5.29e-12
Gh_A01G0805	1687.37	1.4767	0.151025	9.77789	1.4e-22	5.34e-21
Gh_A12G0180	685.421	1.47663	0.14286	10.3362	4.83e-25	2.2e-23
Gh_D11G0795	96.1926	1.47641	0.262271	5.62933	1.81e-08	1.82e-07
Gh_D12G1175	29.0813	1.47629	0.363124	4.06553	4.79e-05	0.00026798
Gh_A10G1652	112.74	1.4755	0.21469	6.87271	6.3e-12	9.76e-11
Gh_A05G0948	22.3256	1.47547	0.423899	3.48072	0.000500067	0.00221246
Gh_A06G1077	22.5653	1.47525	0.415789	3.54807	0.000388067	0.00176901
Gh_D11G3442	48.3322	1.47501	0.426977	3.45454	0.00055124	0.00240844
Gh_A11G1441	116.548	1.47378	0.481576	3.06032	0.00221101	0.00821026
Gh_D09G0853	829.289	1.47333	0.495026	2.97626	0.00291783	0.0104578
Gh_D06G1374	47.1483	1.47267	0.331622	4.44082	8.96e-06	5.81e-05
Gh_A12G0003	1240.64	1.47209	0.232487	6.33195	2.42e-10	3.09e-09
Gh_D07G2007	645.729	1.47189	0.253048	5.81664	6e-09	6.44e-08
Gh_A09G0675	12.6353	1.47171	0.455997	3.22746	0.00124894	0.00497044
Gh_A04G1102	164.927	1.47168	0.276773	5.31726	1.05e-07	9.52e-07
Gh_D12G0551	624.57	1.47149	0.173567	8.47793	2.29e-17	5.95e-16
Gh_A03G1157	29.1313	1.47081	0.339794	4.32853	1.5e-05	9.33e-05
Gh_D01G0417	142.692	1.47067	0.258438	5.6906	1.27e-08	1.3e-07
Gh_A03G0267	847.802	1.47043	0.326843	4.49887	6.83e-06	4.53e-05
Gh_D13G1884	5425.42	1.47029	0.162548	9.04528	1.49e-19	4.59e-18
Gh_D09G2405	82.2505	1.46943	0.370735	3.96356	7.38e-05	0.000397168
Gh_A02G1361	286.693	1.46913	0.425113	3.45587	0.000548519	0.00239796
Gh_D04G1572	174.581	1.46911	0.191471	7.67275	1.68e-14	3.39e-13
Gh_D11G1022	285.766	1.46904	0.186712	7.86795	3.6e-15	7.76e-14
Gh_A08G2542	2388.55	1.46854	0.398674	3.68356	0.000229996	0.00111007
Gh_A12G1439	833.503	1.46829	0.189905	7.73171	1.06e-14	2.18e-13
Gh_Sca072385G01	10.4524	1.46825	0.523953	2.80226	0.00507465	0.0168311
Gh_D12G1518	261.817	1.46802	0.482639	3.04166	0.00235276	0.00866205
Gh_D02G1699	21.9147	1.46788	0.446911	3.28451	0.00102159	0.00415968
Gh_A11G3113	36.4063	1.46779	0.519379	2.82605	0.00471264	0.0158102
Gh_D09G2163	80.4878	1.46766	0.300696	4.88086	1.06e-06	8.08e-06
Gh_A07G1703	554.907	1.4675	0.199034	7.37308	1.67e-13	3.05e-12
Gh_D12G2263	125.864	1.46745	0.229424	6.3962	1.59e-10	2.08e-09
Gh_D12G1517	246.37	1.46734	0.478897	3.064	0.00218402	0.00812867
Gh_D09G2265	37.3593	1.46725	0.421509	3.48095	0.000499647	0.00221105
Gh_A08G2055	24.9764	1.46703	0.477101	3.07489	0.0021058	0.00787162
Gh_D03G0110	28.6531	1.46693	0.359291	4.08285	4.45e-05	0.000250814
Gh_Sca020269G01	83.3376	1.4668	0.283948	5.16573	2.4e-07	2.04e-06
Gh_Sca020139G01	31.4287	1.46658	0.29	5.05718	4.26e-07	3.49e-06
Gh_D12G1334	198.228	1.46658	0.215541	6.80417	1.02e-11	1.54e-10
Gh_A06G1225	347.246	1.4663	0.477509	3.07074	0.0021353	0.00796687
Gh_A03G0513	298.361	1.46492	0.471584	3.10639	0.00189389	0.0071618
Gh_A06G1692	12.3635	1.46475	0.477006	3.07072	0.00213544	0.00796689
Gh_D07G0967	23.5435	1.46472	0.379193	3.86273	0.000112126	0.000580473
Gh_D09G1455	35.4268	1.46434	0.462934	3.16318	0.00156056	0.00605162
Gh_A08G0123	211.58	1.4637	0.375118	3.90198	9.54e-05	0.000501883
Gh_A06G0661	12.061	1.46365	0.459688	3.18401	0.00145248	0.00568098
Gh_D01G1125	116.25	1.46344	0.409003	3.57806	0.000346153	0.00159615
Gh_A13G0747	109.2	1.46326	0.278791	5.24859	1.53e-07	1.35e-06
Gh_A07G0213	174.133	1.46309	0.202679	7.21876	5.25e-13	9.08e-12
Gh_D13G0007	652.795	1.46289	0.192374	7.6044	2.86e-14	5.63e-13
Gh_D05G1241	3.26455	1.46239	0.53679	2.72433	0.0064433	0.0206848
Gh_D07G0458	122.485	1.46171	0.299361	4.88276	1.05e-06	8.01e-06
Gh_A03G0336	183.322	1.46154	0.395547	3.695	0.000219888	0.00106726
Gh_D13G2480	126.06	1.4613	0.375742	3.88911	0.000100612	0.00052585
Gh_D05G3573	3.93209	1.46128	0.534107	2.73592	0.00622056	0.0200748
Gh_D06G1711	110.793	1.46127	0.509032	2.87068	0.0040959	0.0140128
Gh_D02G1980	177.164	1.46023	0.216454	6.74616	1.52e-11	2.24e-10
Gh_A08G0010	2.74335	1.46019	0.533468	2.73716	0.00619721	0.0200092
Gh_D13G0888	214.043	1.46	0.176216	8.2853	1.18e-16	2.88e-15
Gh_D08G0169	1330.44	1.45979	0.16506	8.84401	9.23e-19	2.66e-17
Gh_A04G0349	794.394	1.45968	0.161645	9.03017	1.71e-19	5.25e-18
Gh_A11G3286	45.6672	1.45903	0.311019	4.69111	2.72e-06	1.94e-05
Gh_A08G1852	284.059	1.45871	0.49301	2.95878	0.00308862	0.010986
Gh_D01G1156	216.234	1.4587	0.183307	7.95768	1.75e-15	3.86e-14
Gh_A10G0163	46.3541	1.45824	0.312131	4.6719	2.98e-06	2.11e-05
Gh_D09G2400	74.7263	1.45797	0.264585	5.51041	3.58e-08	3.46e-07
Gh_D02G0129	13.7476	1.45778	0.466203	3.12693	0.00176642	0.00674231
Gh_A04G0510	59.9133	1.45751	0.317497	4.59061	4.42e-06	3.04e-05
Gh_A12G2691	76.2496	1.45703	0.240283	6.06381	1.33e-09	1.56e-08
Gh_D05G0429	3202.09	1.45703	0.193902	7.51423	5.72e-14	1.09e-12
Gh_D08G2362	253.106	1.4566	0.402213	3.62145	0.000292951	0.00137588
Gh_A02G0406	644.136	1.4564	0.219868	6.62394	3.5e-11	4.93e-10
Gh_A09G2140	299.784	1.45581	0.178667	8.14817	3.69e-16	8.63e-15
Gh_A13G1540	230.545	1.45559	0.321931	4.52146	6.14e-06	4.1e-05
Gh_A05G1282	1837.08	1.45557	0.17183	8.47096	2.43e-17	6.3e-16
Gh_D06G0151	1119.9	1.45492	0.166207	8.75369	2.06e-18	5.79e-17
Gh_D05G3602	253.828	1.45416	0.164221	8.85488	8.38e-19	2.42e-17
Gh_A04G0803	20.3692	1.45402	0.468063	3.10645	0.00189346	0.00716061
Gh_D07G1155	116.421	1.45339	0.222914	6.51995	7.03e-11	9.57e-10
Gh_D13G0672	46.2063	1.45292	0.350649	4.14352	3.42e-05	0.000197518
Gh_D10G0452	29.8007	1.45283	0.393479	3.69227	0.000222259	0.0010771
Gh_D07G2097	84.5422	1.45278	0.248968	5.8352	5.37e-09	5.8e-08
Gh_A07G1124	86.951	1.45276	0.232511	6.24811	4.15e-10	5.16e-09
Gh_D04G0574	26.9921	1.45263	0.503366	2.88584	0.00390374	0.0134489
Gh_A13G0207	357.477	1.45244	0.186576	7.78472	6.99e-15	1.46e-13
Gh_D05G1083	255.447	1.4524	0.191372	7.58941	3.21e-14	6.28e-13
Gh_D08G2487	716.932	1.45083	0.499548	2.90429	0.00368093	0.0127908
Gh_A08G0382	94.4531	1.45081	0.236673	6.13002	8.79e-10	1.05e-08
Gh_A08G0097	17.9796	1.45065	0.445297	3.25772	0.00112312	0.00452602
Gh_A09G0374	377.829	1.45001	0.132397	10.952	6.5e-28	3.55e-26
Gh_D08G1435	230.35	1.44999	0.238002	6.09234	1.11e-09	1.31e-08
Gh_D01G0911	23.3755	1.44949	0.502989	2.88175	0.00395478	0.0135972
Gh_D05G3743	3.63846	1.44917	0.537258	2.69734	0.00698956	0.0221957
Gh_D07G0852	23.072	1.4486	0.501077	2.89098	0.00384042	0.013263
Gh_D07G0448	606.691	1.44854	0.185753	7.79817	6.28e-15	1.32e-13
Gh_D01G0233	33.4133	1.4484	0.467156	3.10046	0.00193218	0.0072904
Gh_A08G1996	74.4308	1.44839	0.297522	4.86819	1.13e-06	8.59e-06
Gh_D11G0818	329.072	1.44798	0.189699	7.63303	2.29e-14	4.55e-13
Gh_A06G0518	174.271	1.44734	0.16066	9.00872	2.08e-19	6.34e-18
Gh_A01G0687	7.96932	1.44665	0.519683	2.78373	0.00537385	0.0176787
Gh_D12G0184	28.1649	1.44633	0.481546	3.0035	0.0026689	0.0096728
Gh_D12G1807	4.24388	1.4447	0.534622	2.70228	0.00688651	0.0219033
Gh_A11G2033	58.2067	1.44444	0.302001	4.78292	1.73e-06	1.28e-05
Gh_D09G0088	51.1171	1.44316	0.340853	4.23396	2.3e-05	0.000137365
Gh_A07G0869	16.242	1.44279	0.531399	2.71508	0.00662598	0.0211742
Gh_A08G0748	16.3884	1.4426	0.449836	3.20694	0.00134156	0.00529551
Gh_A11G2725	31.45	1.44253	0.48824	2.95454	0.00313132	0.0111199
Gh_D13G1392	964.064	1.44206	0.157327	9.16603	4.91e-20	1.56e-18
Gh_D12G0975	12.0866	1.44184	0.486101	2.96613	0.00301571	0.0107672
Gh_A07G1541	197.946	1.44131	0.522544	2.75825	0.00581114	0.0189352
Gh_D01G0775	13.6698	1.44112	0.496051	2.90518	0.00367038	0.0127594
Gh_A07G1640	122.442	1.44086	0.496353	2.90289	0.00369735	0.0128374
Gh_D05G0983	21.4901	1.44082	0.471911	3.05317	0.0022644	0.0083808
Gh_A05G0062	572.131	1.44077	0.257756	5.58965	2.28e-08	2.26e-07
Gh_D12G2461	104.506	1.44072	0.231453	6.22467	4.83e-10	5.94e-09
Gh_D09G0361	12.417	1.44026	0.493839	2.91646	0.00354026	0.0123692
Gh_A11G0832	31.2136	1.44024	0.460742	3.12591	0.00177255	0.00675962
Gh_A10G0762	163.39	1.43938	0.210272	6.84533	7.63e-12	1.17e-10
Gh_A08G0634	41.13	1.43922	0.334227	4.30611	1.66e-05	0.000102391
Gh_A12G1330	237.466	1.43913	0.216816	6.63756	3.19e-11	4.53e-10
Gh_D11G2238	738.306	1.43883	0.255378	5.63411	1.76e-08	1.78e-07
Gh_D06G1274	91.2549	1.43876	0.500734	2.8733	0.00406213	0.0139109
Gh_D10G0840	120.269	1.43864	0.272522	5.27899	1.3e-07	1.15e-06
Gh_A05G1121	336.438	1.43859	0.200231	7.18465	6.74e-13	1.15e-11
Gh_A08G2060	5.58964	1.43832	0.532178	2.70271	0.00687763	0.02188
Gh_D01G1424	3.5725	1.43729	0.499577	2.87702	0.00401452	0.0137755
Gh_D01G0043	160.201	1.4372	0.210788	6.81823	9.22e-12	1.4e-10
Gh_A11G3269	323.405	1.43594	0.147531	9.73314	2.18e-22	8.16e-21
Gh_A11G2794	6.56837	1.43568	0.535048	2.68327	0.00729054	0.022993
Gh_D09G2285	473.94	1.43541	0.391403	3.66736	0.000245067	0.00117519
Gh_A06G1084	383.021	1.43534	0.180093	7.96997	1.59e-15	3.51e-14
Gh_A05G2381	326.773	1.43468	0.234586	6.11581	9.61e-10	1.15e-08
Gh_D09G1175	120.262	1.43422	0.264126	5.43006	5.63e-08	5.29e-07
Gh_A13G0340	1176.4	1.43417	0.130217	11.0138	3.28e-28	1.83e-26
Gh_A13G1328	47.5839	1.43409	0.318519	4.50235	6.72e-06	4.46e-05
Gh_D05G2750	59.1482	1.43397	0.396971	3.61227	0.000303528	0.00141962
Gh_D08G1759	105.638	1.43387	0.223645	6.41135	1.44e-10	1.89e-09
Gh_A02G0431	19.7537	1.4336	0.440568	3.25399	0.00113796	0.00457838
Gh_D12G2546	34.5061	1.43355	0.380076	3.77175	0.000162104	0.000811327
Gh_D08G1317	7.55258	1.43355	0.526133	2.72468	0.0064363	0.0206668
Gh_D11G0680	55.9776	1.43323	0.296543	4.83314	1.34e-06	1.01e-05
Gh_D06G0290	82.2916	1.4332	0.275875	5.19509	2.05e-07	1.76e-06
Gh_D08G1475	2.62142	1.43309	0.520718	2.75215	0.0059206	0.0192382
Gh_D11G0545	41.9749	1.43306	0.350372	4.09011	4.31e-05	0.000243731
Gh_A12G0186	131.855	1.4321	0.24456	5.85583	4.75e-09	5.16e-08
Gh_D05G0682	45.4103	1.43171	0.322199	4.44354	8.85e-06	5.74e-05
Gh_A13G1459	145.521	1.43159	0.22592	6.33671	2.35e-10	3.01e-09
Gh_A02G0734	3.13021	1.43107	0.534702	2.67639	0.00744197	0.0234073
Gh_D12G0182	83.433	1.43106	0.305346	4.68667	2.78e-06	1.98e-05
Gh_A09G1906	9.04954	1.43067	0.537992	2.65927	0.00783101	0.0244488
Gh_D13G1056	112.517	1.43048	0.23625	6.05492	1.4e-09	1.64e-08
Gh_D07G2479	446.145	1.43045	0.334384	4.27785	1.89e-05	0.00011482
Gh_D04G1867	30.5367	1.43012	0.421612	3.39203	0.000693772	0.00295462
Gh_A03G0817	238.168	1.43005	0.191759	7.45756	8.81e-14	1.65e-12
Gh_D12G2069	25.5712	1.42994	0.45865	3.11773	0.00182252	0.0069258
Gh_A05G0581	24.451	1.42953	0.489833	2.9184	0.00351836	0.0123086
Gh_A10G0741	22.2449	1.42934	0.462317	3.09169	0.00199021	0.00748704
Gh_D02G1495	5.45078	1.4292	0.533466	2.67909	0.00738235	0.0232443
Gh_A05G0098	803.013	1.42911	0.504827	2.83089	0.00464193	0.0156029
Gh_D11G0364	12.4663	1.42877	0.484783	2.94724	0.00320628	0.0113462
Gh_A11G0796	82.4976	1.42874	0.250902	5.69442	1.24e-08	1.28e-07
Gh_A04G0142	15.8408	1.42861	0.454329	3.14445	0.00166401	0.00639804
Gh_D09G2348	20.913	1.42846	0.410492	3.47987	0.000501658	0.00221835
Gh_D01G0355	22.2162	1.42829	0.401124	3.56071	0.000369854	0.00169455
Gh_A08G1988	29.2395	1.42816	0.386756	3.69266	0.000221916	0.00107578
Gh_Sca030200G01	23.6816	1.42802	0.426329	3.34956	0.000809394	0.00338456
Gh_A13G0329	429.833	1.42784	0.136676	10.447	1.51e-25	7.11e-24
Gh_A13G0939	34.8595	1.42775	0.475704	3.00134	0.00268792	0.00972873
Gh_Sca007080G02	387.61	1.42773	0.188561	7.57172	3.68e-14	7.17e-13
Gh_A05G1671	8.57836	1.42716	0.48909	2.91799	0.00352296	0.0123187
Gh_A06G1851	454.09	1.42716	0.452393	3.15468	0.00160672	0.00620716
Gh_A13G1390	1739.51	1.42629	0.139194	10.2468	1.22e-24	5.38e-23
Gh_A10G1417	826.201	1.42605	0.197612	7.21641	5.34e-13	9.23e-12
Gh_A11G0669	146.905	1.42553	0.196506	7.25439	4.03e-13	7.08e-12
Gh_D02G0141	645.698	1.42549	0.247018	5.77078	7.89e-09	8.34e-08
Gh_D06G0591	73.3752	1.42537	0.434569	3.27996	0.00103823	0.00422105
Gh_A10G1366	98.5588	1.42513	0.214811	6.63435	3.26e-11	4.62e-10
Gh_D05G0648	108.01	1.42495	0.270236	5.27298	1.34e-07	1.19e-06
Gh_D02G2284	120.181	1.42485	0.400768	3.55531	0.000377539	0.00172618
Gh_A13G0778	188.501	1.42483	0.265655	5.36345	8.16e-08	7.5e-07
Gh_A08G1166	2.28285	1.42447	0.441108	3.2293	0.00124096	0.00494266
Gh_D10G1721	56.0725	1.4244	0.391697	3.63647	0.000276395	0.00130759
Gh_A03G1160	1056.26	1.42439	0.10733	13.2711	3.41e-40	3.46e-38
Gh_D08G0194	84.0615	1.42397	0.475542	2.99442	0.00274968	0.00992267
Gh_D12G0924	64.6351	1.4237	0.40164	3.54473	0.00039302	0.00178843
Gh_A05G3956	4.77514	1.42358	0.533677	2.66749	0.00764197	0.0239368
Gh_A08G0600	35.56	1.42318	0.328954	4.32638	1.52e-05	9.41e-05
Gh_D05G0623	5.51407	1.42294	0.521093	2.73068	0.00632046	0.0203475
Gh_D07G0550	231.076	1.42258	0.226357	6.28468	3.29e-10	4.13e-09
Gh_A12G1213	386.889	1.42231	0.403338	3.52634	0.000421349	0.00190049
Gh_D08G1782	49.0079	1.42147	0.311924	4.55711	5.19e-06	3.51e-05
Gh_D08G2481	6.31773	1.42097	0.537386	2.64422	0.00818786	0.025383
Gh_A12G2160	81.9404	1.42052	0.298942	4.75182	2.02e-06	1.47e-05
Gh_A07G1085	769.666	1.41974	0.132941	10.6795	1.27e-26	6.37e-25
Gh_A06G0663	52.5499	1.41947	0.292648	4.85045	1.23e-06	9.32e-06
Gh_A05G2181	205.535	1.41884	0.236853	5.99038	2.09e-09	2.39e-08
Gh_A01G1768	98.5734	1.41871	0.294394	4.81909	1.44e-06	1.08e-05
Gh_A01G0289	503.595	1.41859	0.154065	9.2077	3.33e-20	1.08e-18
Gh_A09G0438	190.572	1.4182	0.20638	6.87177	6.34e-12	9.82e-11
Gh_A09G2304	447.836	1.4182	0.158234	8.96264	3.17e-19	9.47e-18
Gh_A06G1013	1808.04	1.41808	0.109167	12.99	1.39e-38	1.31e-36
Gh_A07G2021	2.13202	1.418	0.478737	2.96195	0.00305696	0.0108929
Gh_A04G1237	17.0491	1.41795	0.454762	3.11801	0.00182075	0.00692039
Gh_D04G1530	2.6022	1.41762	0.529236	2.67862	0.00739254	0.0232727
Gh_D03G0275	6.60688	1.41705	0.520183	2.72413	0.00644704	0.0206957
Gh_A08G2440	675.618	1.41703	0.112156	12.6345	1.36e-36	1.17e-34
Gh_D08G1481	54.2615	1.41644	0.375839	3.76874	0.000164074	0.00081998
Gh_A04G1386	10.3529	1.41642	0.535539	2.64484	0.00817288	0.025342
Gh_A04G0623	25920.3	1.41631	0.150239	9.42705	4.22e-21	1.44e-19
Gh_D03G1329	28.8635	1.41591	0.367897	3.84867	0.000118763	0.000611694
Gh_D09G0854	417.409	1.41564	0.509042	2.78099	0.00541933	0.0178096
Gh_D08G1780	33.3238	1.4156	0.390262	3.62731	0.000286388	0.001349
Gh_D02G1380	35.4986	1.41493	0.386932	3.65679	0.000255398	0.00121923
Gh_D09G0552	75.7412	1.41489	0.270481	5.23101	1.69e-07	1.47e-06
Gh_D07G2365	277.959	1.41453	0.227002	6.23136	4.62e-10	5.71e-09
Gh_A05G1432	27078	1.41378	0.238858	5.91891	3.24e-09	3.6e-08
Gh_A05G2917	36.3739	1.41347	0.360027	3.92601	8.64e-05	0.000458393
Gh_D04G0146	2172.04	1.41272	0.134164	10.5297	6.3e-26	3.03e-24
Gh_D01G0007	134.762	1.41249	0.257207	5.49162	3.98e-08	3.82e-07
Gh_D08G1634	4.50234	1.41218	0.536651	2.63147	0.00850159	0.0262029
Gh_A07G2104	119.4	1.41056	0.223618	6.3079	2.83e-10	3.59e-09
Gh_D02G1552	188.141	1.41042	0.164445	8.57684	9.75e-18	2.6e-16
Gh_D02G0475	12.7023	1.41035	0.47799	2.95058	0.00317177	0.0112454
Gh_D02G0587	21.2957	1.41028	0.47039	2.9981	0.00271667	0.00981906
Gh_A04G0270	34.8147	1.41021	0.413809	3.40787	0.000654709	0.00280775
Gh_A09G0601	5.1968	1.41005	0.536972	2.62593	0.00864128	0.0265606
Gh_A07G0160	814.46	1.41002	0.275032	5.12675	2.95e-07	2.48e-06
Gh_D02G2396	38.4389	1.40965	0.32526	4.33392	1.46e-05	9.12e-05
Gh_A12G1608	6.17858	1.40958	0.537034	2.62476	0.00867104	0.0266383
Gh_D12G1336	297.818	1.40933	0.413943	3.40465	0.000662492	0.00283683
Gh_A10G0330	15.9582	1.40908	0.481877	2.92415	0.00345401	0.0121133
Gh_A08G0280	52.9911	1.40891	0.437787	3.21825	0.00128976	0.00511572
Gh_A09G0836	524.169	1.40856	0.463419	3.0395	0.00236973	0.00871699
Gh_D03G1749	990.172	1.4084	0.0988473	14.2483	4.59e-46	5.96e-44
Gh_Sca073672G01	13.409	1.40834	0.447731	3.1455	0.00165804	0.00637921
Gh_D03G0950	5.27422	1.40775	0.53808	2.61625	0.00889007	0.0271933
Gh_D08G2750	5.31456	1.40714	0.536196	2.62431	0.00868251	0.0266653
Gh_D02G0497	58.753	1.40713	0.315177	4.46457	8.02e-06	5.25e-05
Gh_A09G2318	396.704	1.40695	0.25587	5.49868	3.83e-08	3.69e-07
Gh_D09G2224	20.5645	1.40681	0.45083	3.12048	0.00180557	0.006871
Gh_D10G0637	71.3654	1.40658	0.282885	4.97225	6.62e-07	5.26e-06
Gh_D13G1658	76.3376	1.40622	0.332482	4.22947	2.34e-05	0.000139911
Gh_D11G1394	881.795	1.40608	0.244762	5.7447	9.21e-09	9.64e-08
Gh_A11G1728	218.641	1.40586	0.205681	6.83515	8.19e-12	1.25e-10
Gh_A08G0027	186.686	1.40549	0.195785	7.17873	7.04e-13	1.2e-11
Gh_A13G1866	755.301	1.40548	0.48259	2.91238	0.00358686	0.0125085
Gh_D04G1570	70.896	1.40534	0.25652	5.47848	4.29e-08	4.1e-07
Gh_D02G0702	104.353	1.40525	0.241607	5.81627	6.02e-09	6.45e-08
Gh_A05G3325	101.589	1.40481	0.27938	5.02832	4.95e-07	4e-06
Gh_D06G0393	830.39	1.40475	0.126581	11.0976	1.29e-28	7.32e-27
Gh_A11G0191	7.9637	1.40458	0.536097	2.62002	0.00879249	0.026946
Gh_D07G1848	109.696	1.40453	0.523946	2.68068	0.00734728	0.0231486
Gh_A02G1438	48.8678	1.40447	0.362526	3.87411	0.000107015	0.000555947
Gh_D02G0191	37.5534	1.40424	0.331811	4.23204	2.32e-05	0.000138446
Gh_D13G0059	1002.4	1.40387	0.293665	4.78052	1.75e-06	1.29e-05
Gh_D13G1032	14.2487	1.40371	0.467717	3.00119	0.00268925	0.00973234
Gh_D13G2358	120.64	1.4037	0.417469	3.3624	0.000772669	0.00324696
Gh_D06G1604	18.1489	1.40358	0.483447	2.90328	0.00369281	0.0128262
Gh_A13G1682	6.23106	1.40346	0.530988	2.64311	0.00821489	0.0254486
Gh_A11G1417	1.79635	1.40227	0.508688	2.75664	0.00583986	0.0190173
Gh_A05G0990	17.959	1.40217	0.506116	2.77045	0.00559787	0.0183215
Gh_D07G0124	4.16752	1.40187	0.535522	2.61776	0.00885103	0.0270989
Gh_A06G0497	13.8818	1.40157	0.455024	3.08022	0.00206849	0.00774917
Gh_A01G1903	133.752	1.40099	0.218908	6.39991	1.55e-10	2.03e-09
Gh_D06G0620	14.6737	1.40026	0.430787	3.25047	0.00115214	0.00462759
Gh_D07G0131	3004.23	1.39971	0.165525	8.45616	2.76e-17	7.13e-16
Gh_A12G2101	70.7037	1.39914	0.301411	4.64196	3.45e-06	2.42e-05
Gh_D03G0862	143.48	1.39887	0.213421	6.55454	5.58e-11	7.66e-10
Gh_D12G2105	1128.12	1.39871	0.203824	6.86236	6.77e-12	1.05e-10
Gh_D06G0074	33.2934	1.3986	0.334807	4.17733	2.95e-05	0.000172687
Gh_D09G0213	32.0218	1.39788	0.446449	3.1311	0.00174151	0.00665832
Gh_Sca187679G01	1.84011	1.39761	0.494008	2.82913	0.00466746	0.0156825
Gh_A03G1299	164.991	1.39706	0.240637	5.80567	6.41e-09	6.84e-08
Gh_A07G0307	85.4411	1.39661	0.304594	4.58516	4.54e-06	3.11e-05
Gh_A05G0814	569.744	1.39656	0.199504	7.00018	2.56e-12	4.13e-11
Gh_A02G1391	9.18514	1.39642	0.466145	2.99568	0.00273836	0.00988722
Gh_D11G0787	863.204	1.39638	0.148436	9.40726	5.09e-21	1.74e-19
Gh_A03G1864	231.937	1.39616	0.189101	7.38315	1.55e-13	2.84e-12
Gh_A10G2178	110.2	1.39588	0.265373	5.26006	1.44e-07	1.27e-06
Gh_A07G0290	59.9615	1.39545	0.296039	4.71372	2.43e-06	1.75e-05
Gh_D05G0506	20.5808	1.39497	0.411654	3.3887	0.000702248	0.00298538
Gh_D01G1843	181.223	1.39461	0.250524	5.56676	2.6e-08	2.55e-07
Gh_D05G2929	434.385	1.39448	0.142898	9.75857	1.7e-22	6.43e-21
Gh_D04G0696	119.192	1.39448	0.224109	6.22233	4.9e-10	6.02e-09
Gh_D02G0854	120.778	1.39435	0.243262	5.73191	9.93e-09	1.03e-07
Gh_D11G0359	1727.16	1.39425	0.11217	12.4298	1.8e-35	1.46e-33
Gh_D03G1007	640.734	1.39421	0.170983	8.15405	3.52e-16	8.24e-15
Gh_D01G0708	96.0394	1.39369	0.24261	5.74457	9.22e-09	9.65e-08
Gh_D12G1110	41.1035	1.3931	0.361494	3.85373	0.00011633	0.000600256
Gh_D05G3202	1188.94	1.39301	0.180838	7.70312	1.33e-14	2.71e-13
Gh_A11G3163	646.324	1.39295	0.242569	5.74248	9.33e-09	9.75e-08
Gh_D02G2058	719.237	1.3929	0.120526	11.5569	6.81e-31	4.41e-29
Gh_D13G0381	779.811	1.39264	0.149992	9.28478	1.62e-20	5.33e-19
Gh_D09G1479	1258.7	1.39246	0.237918	5.85267	4.84e-09	5.26e-08
Gh_D11G3014	44.8844	1.3923	0.307135	4.53317	5.81e-06	3.9e-05
Gh_A12G1909	1651.84	1.39192	0.166948	8.33747	7.59e-17	1.88e-15
Gh_D11G0256	9.90436	1.39189	0.523292	2.65988	0.00781693	0.0244138
Gh_D05G1628	138.032	1.39145	0.260431	5.34286	9.15e-08	8.35e-07
Gh_A06G1050	200.924	1.39137	0.461884	3.01238	0.00259204	0.00942929
Gh_A10G0250	20.1712	1.3908	0.454493	3.06011	0.00221254	0.00821491
Gh_A05G3226	504.643	1.39077	0.231963	5.99563	2.03e-09	2.32e-08
Gh_D12G1670	200.21	1.39073	0.191798	7.25101	4.14e-13	7.24e-12
Gh_D08G2421	557.163	1.39059	0.136396	10.1952	2.08e-24	8.99e-23
Gh_A11G1069	46.7373	1.3901	0.325251	4.27392	1.92e-05	0.000116659
Gh_D11G3359	11.9116	1.38996	0.446904	3.11019	0.00186966	0.00707825
Gh_A08G2515	2147.06	1.38988	0.156649	8.87259	7.15e-19	2.08e-17
Gh_A08G2189	12.9474	1.38949	0.440535	3.1541	0.00160992	0.00621728
Gh_A13G1714	2.53454	1.38896	0.526685	2.63717	0.00836009	0.0258377
Gh_A01G1023	322.147	1.38841	0.174083	7.97557	1.52e-15	3.36e-14
Gh_D10G0419	2.84703	1.38834	0.475774	2.91807	0.00352202	0.012317
Gh_A05G0179	111.532	1.38801	0.454907	3.0512	0.00227928	0.00842854
Gh_A11G1016	73.0774	1.38798	0.515121	2.69448	0.00704989	0.0223548
Gh_A10G0701	56.3664	1.38745	0.370099	3.74886	0.000177638	0.000881303
Gh_D01G2190	7.50838	1.38699	0.537626	2.57984	0.00988452	0.0297671
Gh_A05G2433	28.2065	1.38687	0.44711	3.10185	0.00192317	0.0072619
Gh_D06G1969	9.49054	1.38681	0.483842	2.86625	0.00415364	0.0141826
Gh_D05G3160	22.2804	1.38681	0.394579	3.51466	0.000440317	0.00197631
Gh_D10G1316	4562.3	1.38678	0.156783	8.84521	9.14e-19	2.63e-17
Gh_A05G2493	84.4546	1.38654	0.33752	4.10803	3.99e-05	0.000227068
Gh_D11G1509	59.9466	1.38652	0.284947	4.8659	1.14e-06	8.67e-06
Gh_A03G1923	843.818	1.38645	0.223468	6.20425	5.5e-10	6.73e-09
Gh_D07G1351	64.2077	1.38617	0.257969	5.37342	7.73e-08	7.12e-07
Gh_A05G2149	53.0187	1.38615	0.3703	3.74332	0.000181603	0.000898407
Gh_A10G1562	2035.1	1.38539	0.224405	6.17361	6.68e-10	8.1e-09
Gh_D08G1985	15.8606	1.38536	0.387168	3.57818	0.000345998	0.00159556
Gh_A02G1136	67.7493	1.38532	0.43049	3.21802	0.0012908	0.00511892
Gh_A13G0684	32.5467	1.38522	0.404238	3.42675	0.000610843	0.00263979
Gh_D08G0252	1889.23	1.38499	0.150665	9.19252	3.84e-20	1.23e-18
Gh_D10G1168	363.392	1.38492	0.194582	7.11743	1.1e-12	1.84e-11
Gh_D08G2537	9.89532	1.3849	0.492252	2.8134	0.00490208	0.0163462
Gh_D06G0713	409.588	1.38442	0.265526	5.21389	1.85e-07	1.6e-06
Gh_A06G0842	60.8042	1.3844	0.31559	4.3867	1.15e-05	7.31e-05
Gh_D01G1158	74.4161	1.38356	0.274477	5.0407	4.64e-07	3.78e-06
Gh_D07G2009	97.0092	1.38348	0.321236	4.30675	1.66e-05	0.000102118
Gh_A03G1303	13.6538	1.38303	0.460158	3.00554	0.00265107	0.00961991
Gh_A11G1369	161.883	1.38269	0.30304	4.56272	5.05e-06	3.43e-05
Gh_A11G0483	54.2957	1.38263	0.271594	5.09079	3.57e-07	2.96e-06
Gh_A12G1395	249.488	1.38206	0.454104	3.04348	0.00233862	0.00861747
Gh_A13G1177	94.3521	1.38166	0.323364	4.27276	1.93e-05	0.000117137
Gh_D12G2507	90.4775	1.38153	0.24536	5.63063	1.8e-08	1.81e-07
Gh_D12G2106	6.52162	1.38145	0.535456	2.57996	0.00988116	0.0297615
Gh_A10G1702	36.6241	1.38122	0.408787	3.37882	0.000727985	0.00308181
Gh_D11G0605	24.4649	1.38028	0.387254	3.56427	0.000364871	0.00167362
Gh_D13G1195	45.6864	1.38006	0.355777	3.879	0.000104887	0.000546039
Gh_A01G0127	18.5569	1.37974	0.444841	3.10166	0.00192442	0.00726478
[truncated: 6,154 more rows]

## Sheet: 60min
	baseMean	log2FoldChange	lfcSE	stat	pvalue	padj
Gh_A03G0420	12421.2	6.65827	0.188787	35.2687	1.77e-272	2.64e-268
Gh_D03G1125	11704.5	6.2325	0.162995	38.2373	0	0
Gh_A11G0589	9272.33	5.95277	0.378021	15.7472	7.18e-56	1.22e-53
Gh_A03G0405	9960	5.93472	0.20243	29.3174	6.23e-189	4.63e-185
Gh_D03G1135	7303.45	5.52861	0.219583	25.1777	7.03e-140	1.61e-136
Gh_D01G0592	17887.5	5.521	0.210172	26.2689	4.35e-152	1.29e-148
Gh_D11G0676	4098.12	5.42883	0.40967	13.2517	4.41e-40	4.26e-38
Gh_D03G1171	190.77	5.29341	0.331069	15.9888	1.53e-57	2.83e-55
Gh_A06G1853	376.458	5.15924	0.352354	14.6422	1.51e-48	1.98e-46
Gh_D05G1029	711.507	5.15455	0.219936	23.4366	1.81e-121	3.08e-118
Gh_D06G0147	329.032	5.13084	0.324544	15.8094	2.68e-56	4.69e-54
Gh_D09G0035	3023.39	5.11686	0.340771	15.0155	5.81e-51	8.37e-49
Gh_A10G2120	235.699	5.08996	0.340149	14.9639	1.26e-50	1.79e-48
Gh_A01G0581	11189	5.08603	0.135991	37.3997	3.95e-306	7.83e-302
Gh_D01G0143	221.436	5.06567	0.375215	13.5007	1.55e-41	1.6e-39
Gh_D07G0984	415.939	4.99224	0.266392	18.7402	2.33e-78	9.42e-76
Gh_A05G0944	527.784	4.87165	0.227088	21.4527	4.31e-102	3.95e-99
Gh_D10G2441	143.663	4.83496	0.3703	13.0568	5.81e-39	5.34e-37
Gh_A11G1370	1358.3	4.78808	0.174979	27.3638	7.4e-165	2.75e-161
Gh_D09G0277	1039.59	4.69618	0.22921	20.4885	2.73e-93	1.91e-90
Gh_A10G1536	2247.15	4.68046	0.166619	28.0908	1.27e-173	5.81e-170
Gh_A06G1545	920.537	4.61696	0.281797	16.384	2.49e-60	5.16e-58
Gh_A03G1059	524.231	4.56967	0.304615	15.0015	7.18e-51	1.03e-48
Gh_A02G1200	2676.47	4.56174	0.213849	21.3316	5.78e-101	4.99e-98
Gh_D11G1518	1607.94	4.3834	0.165	26.566	1.68e-155	5.54e-152
Gh_A12G1695	415.179	4.34418	0.434255	10.0037	1.47e-23	5.9e-22
Gh_D09G1535	1053.8	4.33318	0.208178	20.8148	3.18e-96	2.52e-93
Gh_D10G2568	1641.26	4.31991	0.168189	25.6849	1.72e-145	4.66e-142
Gh_D02G1690	457.951	4.29813	0.316431	13.5831	5.04e-42	5.35e-40
Gh_A12G1407	766.144	4.18106	0.215435	19.4075	6.67e-84	3.25e-81
Gh_D05G1942	110.135	4.13615	0.365801	11.3071	1.21e-29	7.21e-28
Gh_A12G2096	968.446	4.1351	0.203202	20.3497	4.67e-92	3.12e-89
Gh_A10G2119	185.309	4.1205	0.390329	10.5565	4.74e-26	2.26e-24
Gh_A05G2921	235.552	4.08903	0.297568	13.7415	5.73e-43	6.32e-41
Gh_A05G3111	297.588	4.04376	0.242649	16.665	2.35e-62	5.25e-60
Gh_D02G0075	2402.84	4.03529	0.160204	25.1885	5.36e-140	1.28e-136
Gh_Sca005103G02	1159.14	4.01251	0.228912	17.5286	8.66e-69	2.5e-66
Gh_A06G1269	43623	4.00573	0.300846	13.3149	1.9e-40	1.87e-38
Gh_A06G0990	693.316	3.99829	0.18281	21.8712	4.88e-106	5.1e-103
Gh_D02G1469	121.475	3.97368	0.358066	11.0976	1.29e-28	7.32e-27
Gh_D06G1179	842.12	3.94135	0.147072	26.7987	3.34e-158	1.17e-154
Gh_A10G0688	207.66	3.93657	0.288434	13.6481	2.07e-42	2.23e-40
Gh_A09G0036	1279.5	3.92774	0.393488	9.98184	1.83e-23	7.31e-22
Gh_D06G1658	153.029	3.86076	0.480586	8.03344	9.48e-16	2.1e-14
Gh_D08G1323	442.734	3.85219	0.353274	10.9042	1.1e-27	5.87e-26
Gh_D10G0568	791.969	3.85192	0.202571	19.0152	1.28e-80	5.8e-78
Gh_A03G2087	91.3548	3.82583	0.324296	11.7973	4.03e-32	2.71e-30
Gh_D10G1930	1212.45	3.82446	0.194538	19.6592	4.82e-86	2.61e-83
Gh_D10G0370	1157.86	3.81268	0.183681	20.757	1.06e-95	8.3e-93
Gh_D01G2081	59.0727	3.81025	0.352288	10.8157	2.9e-27	1.5e-25
Gh_D07G1178	176.934	3.77187	0.313586	12.0282	2.53e-33	1.83e-31
Gh_A06G1442	186.118	3.7689	0.250689	15.0342	4.38e-51	6.38e-49
Gh_D06G1595	109.066	3.73571	0.314013	11.8967	1.23e-32	8.59e-31
Gh_A07G1080	142.908	3.71594	0.319426	11.6332	2.79e-31	1.79e-29
Gh_D10G1861	486.205	3.68398	0.30871	11.9335	7.92e-33	5.59e-31
Gh_A11G2550	655.542	3.64731	0.205969	17.708	3.64e-70	1.1e-67
Gh_A10G0527	591.036	3.61858	0.222279	16.2794	1.38e-59	2.73e-57
Gh_D02G1475	59.7902	3.61029	0.352166	10.2516	1.16e-24	5.05e-23
Gh_D11G0764	724.945	3.5773	0.219968	16.2628	1.81e-59	3.56e-57
Gh_D11G1560	44.8199	3.57269	0.390971	9.13798	6.36e-20	2e-18
Gh_D13G0785	53.1872	3.57089	0.390744	9.13869	6.32e-20	1.98e-18
Gh_A07G0910	294.566	3.55895	0.230148	15.4637	6.1e-54	9.83e-52
Gh_A06G1329	80.6937	3.54757	0.489196	7.25183	4.11e-13	6.98e-12
Gh_D08G2193	1105.55	3.54045	0.171022	20.7017	3.34e-95	2.58e-92
Gh_D05G0228	193.886	3.4957	0.30373	11.5092	1.19e-30	7.39e-29
Gh_D05G1190	916.246	3.48951	0.219355	15.908	5.58e-57	1.01e-54
Gh_A10G0593	338.089	3.48934	0.259853	13.4281	4.14e-41	4.16e-39
Gh_A10G0362	2189.07	3.48211	0.188922	18.4314	7.35e-76	2.68e-73
Gh_A09G1400	6585.72	3.47481	0.219196	15.8525	1.35e-56	2.39e-54
Gh_A09G0276	110.482	3.47387	0.321081	10.8193	2.79e-27	1.44e-25
Gh_D09G0271	192.488	3.47346	0.325886	10.6585	1.59e-26	7.89e-25
Gh_D12G1857	1017.7	3.46733	0.323524	10.7174	8.44e-27	4.24e-25
Gh_Sca101707G01	32.5485	3.46565	0.412105	8.40963	4.11e-17	1.03e-15
Gh_A07G1678	395.731	3.46501	0.217981	15.8959	6.76e-57	1.22e-54
Gh_D07G1889	480.051	3.44109	0.211347	16.2817	1.33e-59	2.64e-57
Gh_A13G2244	32.4957	3.43771	0.424342	8.10127	5.44e-16	1.24e-14
Gh_D02G0189	87.0112	3.4335	0.365426	9.39587	5.67e-21	1.94e-19
Gh_Sca081746G01	8590.05	3.43189	0.289668	11.8477	2.21e-32	1.51e-30
Gh_A02G0152	80.6362	3.42541	0.341426	10.0327	1.1e-23	4.44e-22
Gh_D11G1017	2246.64	3.42132	0.209014	16.3689	3.19e-60	6.53e-58
Gh_A10G1673	823.665	3.41381	0.225699	15.1255	1.1e-51	1.65e-49
Gh_A08G0130	41.589	3.41045	0.392099	8.69793	3.38e-18	9.31e-17
Gh_D07G0867	736.425	3.3928	0.191556	17.7118	3.4e-70	1.04e-67
Gh_D05G3432	150.158	3.38224	0.293795	11.5122	1.14e-30	7.15e-29
Gh_A12G1510	167.151	3.38099	0.248205	13.6217	2.97e-42	3.19e-40
Gh_A08G2181	476.177	3.37394	0.227056	14.8595	6.03e-50	8.35e-48
Gh_D12G1765	40.7764	3.36281	0.385128	8.73169	2.51e-18	7e-17
Gh_A01G1662	715.768	3.35889	0.183311	18.3234	5.38e-75	1.92e-72
Gh_A08G1621	407.662	3.35346	0.194112	17.2759	7.14e-67	1.93e-64
Gh_A11G2415	50.0843	3.35112	0.372767	8.98987	2.48e-19	7.48e-18
Gh_D01G1178	59.3381	3.35047	0.357767	9.36496	7.61e-21	2.57e-19
Gh_D08G1934	582.523	3.33959	0.155882	21.4238	8.01e-102	7.22e-99
Gh_D09G0024	228.592	3.3381	0.196417	16.9949	8.96e-65	2.24e-62
Gh_D06G0752	53.1915	3.32454	0.362522	9.17059	4.7e-20	1.49e-18
Gh_A03G1304	90.6613	3.31777	0.299844	11.065	1.85e-28	1.04e-26
Gh_D05G3811	266.63	3.3148	0.251595	13.1752	1.22e-39	1.16e-37
Gh_A08G2422	123.857	3.30245	0.352804	9.36057	7.93e-21	2.67e-19
Gh_A11G0873	1497.82	3.29951	0.200747	16.4361	1.05e-60	2.23e-58
Gh_A09G0026	248.516	3.28872	0.213116	15.4315	1e-53	1.59e-51
Gh_D06G0999	641.344	3.28513	0.199856	16.4375	1.03e-60	2.18e-58
Gh_A13G1960	3282.58	3.27842	0.295732	11.0858	1.47e-28	8.34e-27
Gh_D02G1691	598.591	3.25024	0.213244	15.2419	1.86e-52	2.88e-50
Gh_A05G0798	505.085	3.246	0.217502	14.924	2.3e-50	3.23e-48
Gh_D06G2358	106.902	3.24493	0.282372	11.4917	1.45e-30	9.01e-29
Gh_D12G0901	34.83	3.23781	0.405837	7.97812	1.49e-15	3.24e-14
Gh_A07G1662	33.2031	3.23645	0.408185	7.92888	2.21e-15	4.74e-14
Gh_A12G0372	29.9806	3.23048	0.415621	7.77266	7.69e-15	1.58e-13
Gh_D09G1404	7876.34	3.2139	0.191251	16.8046	2.26e-63	5.23e-61
Gh_A06G1857	993.146	3.21133	0.176249	18.2204	3.56e-74	1.25e-71
Gh_A08G2444	262.485	3.20152	0.234177	13.6714	1.51e-42	1.63e-40
Gh_D08G1268	57.6054	3.1897	0.353938	9.01202	2.02e-19	6.15e-18
Gh_A04G0116	784.286	3.1888	0.205356	15.5281	2.24e-54	3.64e-52
Gh_A06G1309	2359.28	3.18806	0.216681	14.7131	5.31e-49	7.12e-47
Gh_A09G2373	31.0079	3.18751	0.435446	7.3201	2.48e-13	4.33e-12
Gh_D01G1032	37.9858	3.18385	0.457838	6.9541	3.55e-12	5.41e-11
Gh_A08G0680	30.4786	3.18068	0.396812	8.01559	1.1e-15	2.42e-14
Gh_A12G2342	51.2948	3.16455	0.474743	6.66582	2.63e-11	3.64e-10
Gh_A13G0671	30.3324	3.15944	0.45701	6.91329	4.74e-12	7.13e-11
Gh_D10G0640	621.871	3.15064	0.214242	14.706	5.9e-49	7.88e-47
Gh_A01G1973	183.897	3.14783	0.242292	12.9919	1.36e-38	1.23e-36
Gh_D05G0504	277.732	3.14182	0.179236	17.529	8.61e-69	2.5e-66
Gh_A05G1052	99.5292	3.13893	0.341492	9.19183	3.86e-20	1.23e-18
Gh_A09G0247	40.7644	3.13628	0.413593	7.583	3.38e-14	6.49e-13
Gh_A07G2143	40.4229	3.13613	0.404664	7.74996	9.19e-15	1.87e-13
Gh_A13G0839	1764.79	3.13459	0.172634	18.1574	1.12e-73	3.79e-71
Gh_A11G2902	1553.79	3.13037	0.211822	14.7783	2.02e-49	2.74e-47
Gh_A10G1606	73.8259	3.1128	0.379216	8.2085	2.24e-16	5.27e-15
Gh_Sca047584G01	373.856	3.10507	0.229742	13.5154	1.27e-41	1.32e-39
Gh_D08G0136	84.0647	3.09336	0.332152	9.31306	1.24e-20	4.11e-19
Gh_A03G2074	44.1992	3.09261	0.384905	8.03475	9.38e-16	2.08e-14
Gh_D06G0086	209.455	3.08905	0.290769	10.6237	2.31e-26	1.14e-24
Gh_A02G0176	83.439	3.08836	0.302411	10.2125	1.74e-24	7.47e-23
Gh_A03G1250	141.359	3.08821	0.309659	9.97292	2e-23	7.97e-22
Gh_A08G0094	43.1264	3.08324	0.362433	8.50706	1.78e-17	4.64e-16
Gh_D06G1637	1202.96	3.06952	0.246039	12.4757	1.01e-35	8.15e-34
Gh_D13G2354	123.264	3.06904	0.268952	11.4111	3.68e-30	2.24e-28
Gh_A03G0372	125.936	3.06615	0.294541	10.4099	2.23e-25	1.02e-23
Gh_D06G0035	3071.43	3.06591	0.230333	13.3107	2e-40	1.98e-38
Gh_A11G0779	49.3623	3.05686	0.350868	8.71228	2.98e-18	8.25e-17
Gh_D05G3605	683.017	3.05401	0.196866	15.5131	2.83e-54	4.59e-52
Gh_A13G1959	145.596	3.05204	0.267002	11.4308	2.93e-30	1.8e-28
Gh_A08G0371	38.5306	3.04737	0.388376	7.84646	4.28e-15	8.95e-14
Gh_D12G2267	1627.66	3.04108	0.159209	19.1011	2.47e-81	1.14e-78
Gh_A07G1132	46.8687	3.03936	0.405565	7.49415	6.67e-14	1.24e-12
Gh_A08G1494	65.3652	3.0364	0.334085	9.08869	1e-19	3.1e-18
Gh_A07G1493	571.866	3.03577	0.153681	19.7537	7.45e-87	4.11e-84
Gh_A05G1318	56.2867	3.02612	0.342131	8.84491	9.16e-19	2.65e-17
Gh_A08G0451	276.645	3.01702	0.253529	11.9001	1.18e-32	8.26e-31
Gh_D08G0461	30.0745	3.01112	0.416542	7.22885	4.87e-13	8.19e-12
Gh_A07G1957	635.019	3.00792	0.20051	15.0013	7.2e-51	1.03e-48
Gh_A07G1676	54.5517	3.00438	0.378902	7.92916	2.21e-15	4.73e-14
Gh_A06G1003	90.8259	3.0006	0.322198	9.31293	1.24e-20	4.11e-19
Gh_A06G0058	1820.31	3.00011	0.284602	10.5414	5.56e-26	2.63e-24
Gh_D08G0878	68.6941	2.99919	0.310233	9.66755	4.14e-22	1.52e-20
Gh_A01G1096	91.0776	2.99287	0.316815	9.44677	3.49e-21	1.21e-19
Gh_D03G0316	62.6018	2.99127	0.355052	8.42487	3.61e-17	9.12e-16
Gh_D10G2486	27.6189	2.98	0.484376	6.15224	7.64e-10	8.87e-09
Gh_A12G2246	36.2125	2.97862	0.415251	7.17307	7.33e-13	1.21e-11
Gh_D02G1866	68.7188	2.97408	0.338694	8.78103	1.62e-18	4.6e-17
Gh_A02G0063	1443.8	2.97324	0.116904	25.4332	1.08e-142	2.81e-139
Gh_D12G1745	32.7259	2.95015	0.416598	7.08153	1.43e-12	2.27e-11
Gh_A02G0419	181.532	2.94645	0.241322	12.2096	2.76e-34	2.09e-32
Gh_D08G1333	34.7239	2.94516	0.402033	7.32568	2.38e-13	4.16e-12
Gh_D11G3176	19.2552	2.94411	0.425774	6.91472	4.69e-12	7.07e-11
Gh_A08G1045	1049.68	2.94043	0.36958	7.95613	1.78e-15	3.84e-14
Gh_A13G0691	109.622	2.93755	0.324074	9.06444	1.25e-19	3.85e-18
Gh_A12G0329	70.2965	2.93669	0.276821	10.6086	2.72e-26	1.33e-24
Gh_A06G1267	99.3705	2.93661	0.288961	10.1626	2.91e-24	1.23e-22
Gh_A07G0199	181.243	2.93458	0.297114	9.87694	5.24e-23	2.04e-21
Gh_D12G0989	969.827	2.9345	0.196083	14.9656	1.23e-50	1.75e-48
Gh_D11G0557	56.0699	2.93117	0.338754	8.65281	5.02e-18	1.37e-16
Gh_A01G1743	97.2358	2.92151	0.300899	9.70926	2.75e-22	1.02e-20
Gh_A13G1197	740.59	2.91934	0.227903	12.8096	1.45e-37	1.27e-35
Gh_D07G2103	36.7852	2.91441	0.390323	7.46666	8.23e-14	1.51e-12
Gh_D07G0207	34.0053	2.91082	0.42043	6.92344	4.41e-12	6.66e-11
Gh_D10G1976	168.377	2.90253	0.332119	8.73943	2.34e-18	6.56e-17
Gh_A07G0806	878.843	2.90052	0.154977	18.7158	3.68e-78	1.48e-75
Gh_D01G1992	123.398	2.90002	0.276024	10.5064	8.07e-26	3.78e-24
Gh_A09G0270	213.027	2.89603	0.383703	7.54756	4.43e-14	8.4e-13
Gh_D05G0486	196.64	2.89554	0.248968	11.6302	2.89e-31	1.86e-29
Gh_A11G2030	559.554	2.89479	0.255752	11.3187	1.06e-29	6.33e-28
Gh_D12G2477	35.0548	2.89335	0.494123	5.85552	4.76e-09	4.99e-08
Gh_D02G0727	50.1873	2.89168	0.346577	8.34356	7.21e-17	1.77e-15
Gh_D10G1077	113.618	2.88365	0.265525	10.8602	1.78e-27	9.39e-26
Gh_A09G0376	23.0733	2.88277	0.418776	6.8838	5.83e-12	8.67e-11
Gh_A08G0097	17.9796	2.87495	0.46357	6.20177	5.58e-10	6.6e-09
Gh_A08G1051	9.41516	2.87439	0.498172	5.76987	7.93e-09	8.08e-08
Gh_D05G2403	270.414	2.86195	0.240767	11.8868	1.39e-32	9.59e-31
Gh_A03G0897	19.2061	2.86114	0.465632	6.14463	8.02e-10	9.28e-09
Gh_A07G1968	133.958	2.85919	0.24625	11.6109	3.63e-31	2.32e-29
Gh_Sca012173G01	774.954	2.85802	0.20345	14.0478	7.95e-45	9.31e-43
Gh_A12G1734	53.0562	2.84948	0.370436	7.69223	1.45e-14	2.88e-13
Gh_D08G0788	25.8373	2.84601	0.424238	6.70851	1.97e-11	2.76e-10
Gh_D12G0180	1710.6	2.8419	0.190422	14.9243	2.29e-50	3.22e-48
Gh_D12G1634	148.107	2.84189	0.243044	11.6929	1.38e-31	9.03e-30
Gh_D05G3188	29.7557	2.84163	0.379964	7.47868	7.51e-14	1.38e-12
Gh_D10G0335	89.5993	2.84042	0.343233	8.2755	1.28e-16	3.07e-15
Gh_D13G2170	379.902	2.8398	0.210721	13.4766	2.15e-41	2.2e-39
Gh_D06G1195	75.0767	2.83901	0.319339	8.89027	6.1e-19	1.78e-17
Gh_A06G0110	237.974	2.83744	0.245134	11.5751	5.51e-31	3.51e-29
Gh_A12G2341	52.1523	2.83368	0.446675	6.34395	2.24e-10	2.77e-09
Gh_D05G0917	592.43	2.83175	0.197007	14.3738	7.55e-47	9.43e-45
Gh_D01G0912	101.213	2.83004	0.302981	9.34066	9.57e-21	3.2e-19
Gh_A12G2480	34.3534	2.82477	0.338085	8.3552	6.53e-17	1.61e-15
Gh_D07G0523	1262.53	2.81744	0.232459	12.1201	8.26e-34	6.1e-32
Gh_D06G1593	39400.1	2.81352	0.282645	9.95425	2.42e-23	9.58e-22
Gh_D11G3490	414.84	2.8073	0.156808	17.9027	1.12e-71	3.61e-69
Gh_A10G2338	112.66	2.80585	0.277592	10.1078	5.1e-24	2.12e-22
Gh_A04G0321	188.651	2.80346	0.256251	10.9403	7.4e-28	3.98e-26
Gh_A08G0686	190.581	2.80012	0.235423	11.894	1.27e-32	8.86e-31
Gh_A11G1682	34.1141	2.79722	0.387479	7.21901	5.24e-13	8.78e-12
Gh_D05G3327	273.943	2.79603	0.212096	13.1828	1.1e-39	1.05e-37
Gh_A09G1209	221.981	2.79247	0.248925	11.2181	3.32e-29	1.94e-27
Gh_D08G0498	146.935	2.78584	0.251159	11.0919	1.37e-28	7.79e-27
Gh_A12G0458	143.334	2.7852	0.27368	10.1768	2.52e-24	1.07e-22
Gh_D05G1488	55.702	2.78362	0.331058	8.40828	4.16e-17	1.04e-15
Gh_A09G1156	65.2553	2.78345	0.30867	9.01754	1.92e-19	5.85e-18
Gh_A13G0846	404.076	2.78237	0.265877	10.4649	1.25e-25	5.78e-24
Gh_D01G0153	40.2939	2.78126	0.410481	6.77562	1.24e-11	1.78e-10
Gh_A05G3518	65.3733	2.78066	0.321014	8.66211	4.63e-18	1.26e-16
Gh_D12G1637	71.0596	2.77862	0.477562	5.81835	5.94e-09	6.16e-08
Gh_D05G1090	498.518	2.7641	0.234789	11.7727	5.4e-32	3.6e-30
Gh_D05G1864	47.3839	2.75942	0.370846	7.44087	1e-13	1.82e-12
Gh_D07G1887	56.8827	2.75767	0.320028	8.61696	6.88e-18	1.85e-16
Gh_D12G0215	30.3783	2.757	0.434335	6.34763	2.19e-10	2.7e-09
Gh_A05G2284	40.048	2.75641	0.378711	7.2784	3.38e-13	5.8e-12
Gh_D06G1853	54.3544	2.75248	0.385617	7.13786	9.48e-13	1.54e-11
Gh_D10G0367	48.0742	2.75201	0.384805	7.1517	8.57e-13	1.4e-11
Gh_D10G2116	21.7942	2.75199	0.450843	6.1041	1.03e-09	1.18e-08
Gh_D08G0240	264.628	2.74937	0.256865	10.7036	9.79e-27	4.89e-25
Gh_A12G0724	54.0558	2.74588	0.384515	7.14115	9.26e-13	1.5e-11
Gh_A06G1326	133.807	2.7437	0.213041	12.8788	5.93e-38	5.25e-36
Gh_D04G0069	498.124	2.74061	0.186635	14.6843	8.13e-49	1.08e-46
Gh_A01G0071	15.7725	2.73173	0.479701	5.69465	1.24e-08	1.23e-07
Gh_A12G1832	95.0206	2.72847	0.290345	9.39732	5.6e-21	1.92e-19
Gh_D11G2986	26.1822	2.72811	0.458105	5.95522	2.6e-09	2.83e-08
Gh_D04G1081	19309.4	2.72502	0.160907	16.9354	2.47e-64	6.02e-62
Gh_A11G0877	370.77	2.72343	0.188595	14.4407	2.87e-47	3.62e-45
Gh_A05G2814	56.604	2.72306	0.370585	7.34801	2.01e-13	3.55e-12
Gh_D01G2233	232.774	2.71561	0.198224	13.6997	1.02e-42	1.12e-40
Gh_A11G0632	30.2846	2.7149	0.409727	6.62612	3.45e-11	4.69e-10
Gh_A07G2025	1237.35	2.70937	0.168593	16.0705	4.11e-58	7.74e-56
Gh_D13G2355	1396.46	2.70827	0.325352	8.32414	8.49e-17	2.07e-15
Gh_D02G1278	31.6473	2.7069	0.404416	6.69335	2.18e-11	3.05e-10
Gh_D07G1645	255.032	2.6996	0.20626	13.0883	3.84e-39	3.56e-37
Gh_A07G0276	90.7544	2.69678	0.304554	8.85487	8.38e-19	2.43e-17
Gh_A10G0692	2624.51	2.69485	0.132363	20.3596	3.82e-92	2.58e-89
Gh_A06G0639	26.0376	2.69446	0.414689	6.49755	8.16e-11	1.06e-09
Gh_D06G1157	660.478	2.69388	0.214071	12.5841	2.58e-36	2.14e-34
Gh_A01G1881	105.165	2.69356	0.333079	8.08684	6.12e-16	1.39e-14
Gh_D01G1297	38.1937	2.69243	0.423895	6.35163	2.13e-10	2.64e-09
Gh_A05G0860	79.047	2.6888	0.339573	7.9182	2.41e-15	5.15e-14
Gh_A02G1102	52.7516	2.68413	0.332259	8.07841	6.56e-16	1.49e-14
Gh_D08G2462	443.369	2.68087	0.183954	14.5736	4.14e-48	5.35e-46
Gh_A01G0144	40.68	2.67733	0.400625	6.6829	2.34e-11	3.26e-10
Gh_A11G1412	63.975	2.67572	0.350296	7.63847	2.2e-14	4.3e-13
Gh_D01G1658	63.2938	2.67553	0.340573	7.85596	3.97e-15	8.32e-14
Gh_D13G0030	58.6768	2.6752	0.321813	8.31292	9.34e-17	2.27e-15
Gh_A02G0237	1593.77	2.67475	0.166381	16.076	3.76e-58	7.1e-56
Gh_A11G0506	272.462	2.67393	0.187775	14.2401	5.17e-46	6.28e-44
Gh_A05G3050	82.595	2.66527	0.304461	8.75406	2.06e-18	5.78e-17
Gh_D10G0952	525.994	2.65556	0.207981	12.7683	2.47e-37	2.12e-35
Gh_A05G2668	57.8376	2.65534	0.296929	8.94269	3.8e-19	1.13e-17
Gh_A12G0524	65.846	2.65152	0.335378	7.90607	2.66e-15	5.65e-14
Gh_D05G0696	76.0585	2.64999	0.333433	7.94758	1.9e-15	4.1e-14
Gh_A05G0164	363.079	2.6473	0.300437	8.81151	1.23e-18	3.54e-17
Gh_D04G1450	39.107	2.64281	0.36426	7.25529	4.01e-13	6.81e-12
Gh_D02G2065	29.5705	2.63994	0.416651	6.33609	2.36e-10	2.9e-09
Gh_D12G1596	770.422	2.63587	0.17431	15.1217	1.16e-51	1.75e-49
Gh_A07G2296	33.3357	2.63281	0.383241	6.86986	6.43e-12	9.54e-11
Gh_A12G0155	76.2883	2.63061	0.28216	9.32311	1.13e-20	3.75e-19
Gh_D12G2676	794.104	2.62942	0.225498	11.6605	2.03e-31	1.31e-29
Gh_D11G2375	571.541	2.62665	0.231796	11.3317	9.14e-30	5.47e-28
Gh_Sca005798G01	2566.82	2.62517	0.13363	19.645	6.38e-86	3.39e-83
Gh_A10G0583	1627.64	2.62005	0.18372	14.2611	3.82e-46	4.67e-44
Gh_D09G1162	59.896	2.61992	0.351681	7.44969	9.36e-14	1.71e-12
Gh_D12G1541	191.458	2.61972	0.217539	12.0425	2.12e-33	1.54e-31
Gh_D08G2381	40.0069	2.61953	0.421823	6.21002	5.3e-10	6.28e-09
Gh_D11G2913	838.398	2.6189	0.209793	12.4833	9.21e-36	7.44e-34
Gh_D02G0631	177.95	2.61352	0.238086	10.9772	4.92e-28	2.68e-26
Gh_A12G1497	152.023	2.60642	0.384781	6.77378	1.25e-11	1.8e-10
Gh_D12G0250	36.1608	2.60324	0.395043	6.58976	4.41e-11	5.91e-10
Gh_D03G1648	150.044	2.59772	0.257555	10.0861	6.37e-24	2.62e-22
Gh_A01G2040	59.7591	2.5958	0.355002	7.31208	2.63e-13	4.57e-12
Gh_A04G1432	43.6565	2.59433	0.336588	7.70772	1.28e-14	2.56e-13
Gh_A12G0053	51.9767	2.59211	0.369353	7.01796	2.25e-12	3.51e-11
Gh_A01G1840	59.6016	2.59024	0.321977	8.0448	8.64e-16	1.93e-14
Gh_A04G0933	36.4132	2.58422	0.395923	6.52709	6.71e-11	8.77e-10
Gh_A02G1612	15.3757	2.58174	0.478394	5.39667	6.79e-08	6.02e-07
Gh_A10G0256	79.308	2.57848	0.34463	7.48186	7.33e-14	1.35e-12
Gh_A12G1622	24.7117	2.57475	0.431893	5.96155	2.5e-09	2.72e-08
Gh_D12G1094	50.3363	2.56874	0.379975	6.76029	1.38e-11	1.97e-10
Gh_A01G1324	8344.35	2.56825	0.201472	12.7474	3.22e-37	2.77e-35
Gh_D13G0763	122.208	2.56618	0.267207	9.6037	7.71e-22	2.8e-20
Gh_A07G2223	47.3793	2.5595	0.395138	6.47748	9.33e-11	1.2e-09
Gh_D10G1422	242.575	2.55913	0.244377	10.472	1.16e-25	5.39e-24
Gh_A11G0221	35.3374	2.55897	0.37789	6.77172	1.27e-11	1.83e-10
Gh_A09G0153	3119.61	2.5552	0.150085	17.025	5.36e-65	1.35e-62
Gh_A05G3168	20.451	2.55368	0.452037	5.64927	1.61e-08	1.57e-07
Gh_D03G1703	103.698	2.55115	0.297398	8.57824	9.63e-18	2.56e-16
Gh_A11G0723	332.901	2.5471	0.259035	9.83303	8.11e-23	3.12e-21
Gh_D01G0003	194.203	2.54647	0.305732	8.32911	8.15e-17	1.99e-15
Gh_A12G0640	34.8731	2.54611	0.425113	5.98925	2.11e-09	2.32e-08
Gh_A11G3288	109.527	2.54058	0.252639	10.0562	8.63e-24	3.53e-22
Gh_A09G2143	12.6906	2.53981	0.48159	5.27379	1.34e-07	1.13e-06
Gh_A01G1562	1924.27	2.53952	0.136083	18.6616	1.02e-77	4.01e-75
Gh_D12G0067	55.1801	2.53879	0.336803	7.53791	4.78e-14	9.01e-13
Gh_D13G1029	442.164	2.53838	0.205532	12.3503	4.85e-35	3.78e-33
Gh_D11G0842	370.037	2.53494	0.263968	9.60319	7.75e-22	2.81e-20
Gh_D09G1113	1772.23	2.53209	0.142725	17.7411	2.02e-70	6.2e-68
Gh_Sca004802G02	55.0362	2.52994	0.35197	7.18793	6.58e-13	1.09e-11
Gh_D12G0748	51.5708	2.52992	0.331279	7.63682	2.23e-14	4.35e-13
Gh_D02G0135	45.2053	2.52984	0.38779	6.52373	6.86e-11	8.97e-10
Gh_A04G0085	29.8828	2.52485	0.37907	6.66064	2.73e-11	3.76e-10
Gh_D07G1120	312.855	2.52135	0.278041	9.06826	1.21e-19	3.73e-18
Gh_D09G0193	24.6034	2.52031	0.419713	6.00484	1.92e-09	2.12e-08
Gh_A09G0944	27.1365	2.51997	0.444733	5.66626	1.46e-08	1.43e-07
Gh_A09G0935	32.8488	2.51796	0.445748	5.64884	1.62e-08	1.58e-07
Gh_A11G1178	919.957	2.51692	0.231393	10.8772	1.48e-27	7.84e-26
Gh_D03G0871	41.5944	2.51489	0.375057	6.70534	2.01e-11	2.82e-10
Gh_D13G1764	63.0807	2.51483	0.309546	8.12427	4.5e-16	1.03e-14
Gh_D09G1507	128.329	2.51465	0.258868	9.71404	2.63e-22	9.78e-21
Gh_A09G1208	426.18	2.51083	0.209661	11.9757	4.77e-33	3.41e-31
Gh_A07G1824	22.5473	2.51045	0.447687	5.60761	2.05e-08	1.97e-07
Gh_D08G1926	130.676	2.50404	0.228941	10.9375	7.63e-28	4.1e-26
Gh_A11G0479	57.2616	2.49971	0.339941	7.35337	1.93e-13	3.41e-12
Gh_D06G1215	1553.47	2.49969	0.131636	18.9894	2.09e-80	9.34e-78
Gh_A02G0571	199.91	2.49882	0.19158	13.0433	6.94e-39	6.36e-37
Gh_A01G0431	1024.32	2.49263	0.191056	13.0466	6.65e-39	6.1e-37
Gh_D13G0991	36.0117	2.49012	0.401792	6.19754	5.74e-10	6.77e-09
Gh_D05G2969	22.6922	2.48687	0.457352	5.43755	5.4e-08	4.87e-07
Gh_D09G1487	348.27	2.4855	0.191804	12.9585	2.1e-38	1.88e-36
Gh_D06G1374	47.1483	2.48116	0.343316	7.22704	4.94e-13	8.29e-12
Gh_D12G1525	1239.68	2.47448	0.215228	11.497	1.37e-30	8.49e-29
Gh_A11G2821	12.4956	2.47434	0.479709	5.15799	2.5e-07	2.02e-06
Gh_D08G0800	177.367	2.47025	0.264851	9.32697	1.09e-20	3.62e-19
Gh_D08G1046	466.808	2.46838	0.215242	11.4679	1.91e-30	1.18e-28
Gh_D11G0141	1504.95	2.46653	0.164665	14.9791	1.01e-50	1.43e-48
Gh_A10G1194	76.7761	2.46601	0.290916	8.47672	2.32e-17	5.96e-16
Gh_A02G1233	46.7547	2.46337	0.339535	7.25511	4.01e-13	6.82e-12
Gh_D01G0189	40.9842	2.46198	0.414861	5.93448	2.95e-09	3.18e-08
Gh_A07G2212	846.696	2.45887	0.142981	17.1972	2.78e-66	7.33e-64
Gh_D02G0046	89.5874	2.45756	0.318981	7.70441	1.31e-14	2.62e-13
Gh_A01G1767	2538.99	2.45688	0.153115	16.046	6.1e-58	1.14e-55
Gh_D06G0727	12.7156	2.45188	0.490056	5.00326	5.64e-07	4.33e-06
Gh_A11G2216	1054.1	2.45135	0.145799	16.8132	1.95e-63	4.56e-61
Gh_A10G0809	647.779	2.45002	0.161527	15.1679	5.77e-52	8.72e-50
Gh_A03G1592	39.7462	2.44642	0.417525	5.85933	4.65e-09	4.89e-08
Gh_A01G1103	59.1683	2.44477	0.323574	7.55553	4.17e-14	7.93e-13
Gh_Sca044897G01	21.7301	2.44431	0.44178	5.53287	3.15e-08	2.95e-07
Gh_D04G0716	430.152	2.44405	0.196124	12.4618	1.21e-35	9.64e-34
Gh_D11G3019	56.4778	2.443	0.325999	7.49387	6.69e-14	1.24e-12
Gh_D05G0027	42.3142	2.4419	0.407162	5.99737	2.01e-09	2.21e-08
Gh_D12G2546	34.5061	2.44007	0.384335	6.3488	2.17e-10	2.68e-09
Gh_A05G3321	580.902	2.43774	0.244825	9.95709	2.35e-23	9.31e-22
Gh_D06G0902	1187.56	2.43668	0.215357	11.3146	1.11e-29	6.63e-28
Gh_A07G0869	16.242	2.43444	0.526976	4.61965	3.84e-06	2.58e-05
Gh_A13G2149	16.6806	2.43238	0.447198	5.43915	5.35e-08	4.83e-07
Gh_D04G0852	73.5526	2.43223	0.301783	8.05952	7.66e-16	1.72e-14
Gh_A09G1497	114.287	2.43128	0.247808	9.81113	1.01e-22	3.86e-21
Gh_A03G1806	1695.34	2.42959	0.17856	13.6066	3.66e-42	3.9e-40
Gh_D09G1309	90.6908	2.42729	0.292061	8.3109	9.5e-17	2.3e-15
Gh_D06G1981	18.0617	2.4261	0.43506	5.57646	2.45e-08	2.34e-07
Gh_A12G0900	790.882	2.42488	0.207986	11.6589	2.07e-31	1.34e-29
Gh_A09G1303	125.653	2.42377	0.257421	9.41561	4.7e-21	1.62e-19
Gh_D05G1800	175.656	2.42354	0.304214	7.96656	1.63e-15	3.54e-14
Gh_D06G1307	93.11	2.42279	0.341398	7.09667	1.28e-12	2.04e-11
Gh_D04G1552	96.0269	2.42122	0.272593	8.88219	6.56e-19	1.91e-17
Gh_D05G1416	32.1063	2.41935	0.431391	5.60826	2.04e-08	1.97e-07
Gh_D05G2148	244.622	2.41839	0.234841	10.298	7.2e-25	3.16e-23
Gh_A04G1019	57.5045	2.41839	0.314962	7.67835	1.61e-14	3.19e-13
Gh_A06G1485	60.2563	2.4157	0.330284	7.314	2.59e-13	4.51e-12
Gh_A07G1243	67.0474	2.40146	0.293481	8.18268	2.78e-16	6.48e-15
Gh_D05G1773	752.752	2.39987	0.240649	9.97248	2.01e-23	8e-22
Gh_D12G2309	1417.99	2.39899	0.155229	15.4545	7.03e-54	1.13e-51
Gh_D09G2346	295.158	2.39419	0.191194	12.5224	5.63e-36	4.6e-34
Gh_A10G0780	101.469	2.39401	0.2893	8.27516	1.28e-16	3.08e-15
Gh_Sca092200G01	5.42013	2.39343	0.524497	4.56329	5.04e-06	3.3e-05
Gh_A12G0179	2125.9	2.39315	0.153135	15.6277	4.71e-55	7.93e-53
Gh_D04G1775	16.4538	2.39095	0.463358	5.16005	2.47e-07	2e-06
Gh_D08G1225	68.0989	2.39023	0.353464	6.7623	1.36e-11	1.94e-10
Gh_D02G2024	25.5523	2.38657	0.420171	5.67999	1.35e-08	1.33e-07
Gh_D13G1769	27.1838	2.38649	0.516557	4.61999	3.84e-06	2.57e-05
Gh_D07G1232	54.0225	2.38285	0.30436	7.82905	4.92e-15	1.02e-13
Gh_A06G1771	57.72	2.38218	0.361262	6.59406	4.28e-11	5.74e-10
Gh_D02G0240	57.0828	2.37996	0.34154	6.96833	3.21e-12	4.9e-11
Gh_D12G1347	96.1231	2.37815	0.339519	7.00447	2.48e-12	3.85e-11
Gh_A10G0965	30.5648	2.37608	0.406373	5.84704	5e-09	5.23e-08
Gh_D01G0038	10.6816	2.3757	0.490067	4.84771	1.25e-06	9.08e-06
Gh_A07G1227	132.905	2.37435	0.292388	8.12055	4.64e-16	1.06e-14
Gh_D12G1093	15.1954	2.37193	0.478018	4.96202	6.98e-07	5.27e-06
Gh_D05G1030	399.806	2.37125	0.170392	13.9165	5.03e-44	5.75e-42
Gh_D07G1304	38.5157	2.36972	0.394814	6.00212	1.95e-09	2.15e-08
Gh_A01G0281	479.326	2.36954	0.155923	15.1969	3.71e-52	5.66e-50
Gh_A13G1951	272.168	2.36922	0.17739	13.356	1.09e-40	1.08e-38
Gh_D12G0796	26.502	2.36819	0.402671	5.88122	4.07e-09	4.32e-08
Gh_D01G1811	1147.75	2.36762	0.161575	14.6534	1.28e-48	1.68e-46
Gh_D10G0599	1033	2.36725	0.151929	15.5813	9.75e-55	1.62e-52
Gh_D08G1738	34.7218	2.36522	0.384264	6.15519	7.5e-10	8.72e-09
Gh_A03G1973	199.643	2.36496	0.242779	9.74121	2.01e-22	7.54e-21
Gh_D11G0742	44.2966	2.36367	0.373748	6.32423	2.55e-10	3.12e-09
Gh_D01G0438	859.718	2.36238	0.194809	12.1266	7.63e-34	5.67e-32
Gh_D04G1954	713.434	2.36221	0.198065	11.9264	8.62e-33	6.05e-31
Gh_D09G1622	212.009	2.36078	0.22552	10.4682	1.21e-25	5.6e-24
Gh_A11G0127	1832.35	2.35861	0.173279	13.6116	3.42e-42	3.65e-40
Gh_D07G0885	631.912	2.35765	0.152003	15.5105	2.95e-54	4.77e-52
Gh_A07G1883	188.314	2.35484	0.213029	11.0541	2.09e-28	1.17e-26
Gh_D12G2102	44.1891	2.34816	0.357994	6.55922	5.41e-11	7.14e-10
Gh_A07G0459	1641.44	2.34791	0.179762	13.0612	5.49e-39	5.06e-37
Gh_D12G0746	26.2711	2.34778	0.408882	5.74195	9.36e-09	9.43e-08
Gh_A09G0934	56.1862	2.34656	0.3548	6.61375	3.75e-11	5.06e-10
Gh_A12G1422	218.265	2.34637	0.216612	10.8322	2.42e-27	1.26e-25
Gh_A12G0486	48.6739	2.34388	0.353079	6.6384	3.17e-11	4.34e-10
Gh_D11G2732	22.8943	2.34279	0.464673	5.04181	4.61e-07	3.59e-06
Gh_D08G0634	41.9852	2.34217	0.35644	6.571	5e-11	6.64e-10
Gh_A02G1405	57.5096	2.34208	0.314222	7.45358	9.08e-14	1.66e-12
Gh_A09G0224	23.5383	2.34037	0.451586	5.18256	2.19e-07	1.78e-06
Gh_A05G0980	428.249	2.3368	0.209256	11.1672	5.9e-29	3.4e-27
Gh_D06G1105	143.138	2.33632	0.208685	11.1954	4.29e-29	2.49e-27
Gh_A12G2727	46.3069	2.33603	0.320832	7.28115	3.31e-13	5.69e-12
Gh_Sca017354G01	201.798	2.3299	0.383461	6.07599	1.23e-09	1.4e-08
Gh_D04G0091	57.1908	2.32954	0.32099	7.25737	3.95e-13	6.71e-12
Gh_D05G3904	98.7373	2.32915	0.294651	7.90477	2.68e-15	5.7e-14
Gh_A09G1477	330.241	2.32837	0.183523	12.687	6.98e-37	5.92e-35
Gh_D11G2799	48.275	2.32715	0.346905	6.70833	1.97e-11	2.76e-10
Gh_A11G0336	45.2865	2.32481	0.503558	4.61677	3.9e-06	2.61e-05
Gh_A10G1028	7.80439	2.3216	0.525353	4.41913	9.91e-06	6.15e-05
Gh_D11G2309	630.123	2.32117	0.188691	12.3014	8.9e-35	6.85e-33
Gh_D10G2105	43.955	2.31951	0.484708	4.78538	1.71e-06	1.21e-05
Gh_D08G1881	76.0684	2.31749	0.288312	8.03813	9.12e-16	2.03e-14
Gh_D12G1623	301.576	2.31564	0.286866	8.07219	6.9e-16	1.56e-14
Gh_A03G0850	28.2136	2.31464	0.40307	5.74254	9.33e-09	9.41e-08
Gh_A05G0567	73.9756	2.31336	0.274374	8.43143	3.41e-17	8.65e-16
Gh_D07G0797	331.886	2.31231	0.251472	9.19509	3.75e-20	1.19e-18
Gh_D07G0363	27.5112	2.30803	0.449382	5.136	2.81e-07	2.25e-06
Gh_A09G2258	222.672	2.3077	0.248792	9.27563	1.77e-20	5.77e-19
Gh_D09G0245	61.6087	2.30719	0.38888	5.93292	2.98e-09	3.21e-08
Gh_D02G0475	12.7023	2.30679	0.496303	4.64794	3.35e-06	2.27e-05
Gh_A08G0407	117.909	2.30558	0.268796	8.57743	9.7e-18	2.58e-16
Gh_A05G2459	39.0121	2.30536	0.415271	5.55146	2.83e-08	2.67e-07
Gh_D02G0305	1147.74	2.30491	0.17585	13.1073	2.99e-39	2.79e-37
Gh_D02G1858	45.332	2.29861	0.322623	7.12476	1.04e-12	1.69e-11
Gh_D08G0537	548.721	2.2983	0.178467	12.878	5.99e-38	5.29e-36
Gh_A01G1167	63.0967	2.29798	0.344643	6.66773	2.6e-11	3.59e-10
Gh_D10G0695	1300.91	2.29661	0.120466	19.0644	4.99e-81	2.29e-78
Gh_D05G2726	57.5902	2.29456	0.360587	6.3634	1.97e-10	2.45e-09
Gh_A11G1329	54.5027	2.29279	0.325041	7.05385	1.74e-12	2.75e-11
Gh_D12G1478	1878.49	2.29275	0.169067	13.5612	6.8e-42	7.18e-40
Gh_A03G1649	43.0297	2.29183	0.348821	6.5702	5.02e-11	6.67e-10
Gh_D04G1912	16.3388	2.29095	0.442889	5.17274	2.31e-07	1.87e-06
Gh_A12G1468	828.234	2.28856	0.198407	11.5347	8.82e-31	5.54e-29
Gh_A05G2087	318.107	2.2879	0.228856	9.99712	1.57e-23	6.29e-22
Gh_A05G3069	19.7592	2.28735	0.512566	4.46255	8.1e-06	5.11e-05
Gh_D09G2405	82.2505	2.28609	0.361162	6.32982	2.45e-10	3.01e-09
Gh_D01G1541	6968.5	2.28591	0.157876	14.4791	1.64e-47	2.1e-45
Gh_A08G1988	29.2395	2.28412	0.412461	5.53778	3.06e-08	2.88e-07
Gh_D09G0962	34.7608	2.28349	0.367441	6.21457	5.15e-10	6.1e-09
Gh_D06G1335	178.46	2.28259	0.308506	7.39887	1.37e-13	2.47e-12
Gh_D05G1176	41.4974	2.28247	0.357356	6.38712	1.69e-10	2.12e-09
Gh_A09G1508	186.519	2.28232	0.448071	5.09365	3.51e-07	2.78e-06
Gh_D11G1412	111.713	2.28201	0.301212	7.57609	3.56e-14	6.84e-13
Gh_A02G0718	42.3308	2.27896	0.346553	6.57609	4.83e-11	6.43e-10
Gh_A12G1458	78.3495	2.27503	0.293017	7.76415	8.22e-15	1.68e-13
Gh_D05G0736	11.8263	2.27253	0.492754	4.6119	3.99e-06	2.66e-05
Gh_A08G2533	808.675	2.27185	0.369691	6.14527	7.98e-10	9.25e-09
Gh_A04G0432	53.9349	2.27103	0.348758	6.51176	7.43e-11	9.66e-10
Gh_D04G0395	459.108	2.26921	0.227322	9.98237	1.82e-23	7.27e-22
Gh_A05G3445	1593.94	2.26834	0.167874	13.5122	1.32e-41	1.38e-39
Gh_D10G1577	20.2704	2.26734	0.487586	4.65013	3.32e-06	2.25e-05
Gh_D06G0576	2582.24	2.26734	0.243079	9.32758	1.08e-20	3.61e-19
Gh_D01G0156	12.1359	2.26527	0.522372	4.3365	1.45e-05	8.72e-05
Gh_D04G0855	2650.37	2.26478	0.155143	14.598	2.89e-48	3.78e-46
Gh_D01G1138	73.1194	2.26006	0.292081	7.73778	1.01e-14	2.05e-13
Gh_D11G2981	109.748	2.25892	0.247252	9.13611	6.47e-20	2.03e-18
Gh_D01G0502	587.615	2.25626	0.358458	6.29434	3.09e-10	3.74e-09
Gh_A04G0678	361.238	2.25455	0.17919	12.5819	2.66e-36	2.2e-34
Gh_D05G0830	31.8455	2.25413	0.489738	4.60273	4.17e-06	2.78e-05
Gh_D11G2985	42.409	2.25342	0.372818	6.04428	1.5e-09	1.68e-08
Gh_D05G0177	79.7716	2.25316	0.304174	7.40748	1.29e-13	2.32e-12
Gh_A11G2657	51.1606	2.25004	0.353849	6.35876	2.03e-10	2.52e-09
Gh_D13G0836	4112.52	2.24992	0.171395	13.1271	2.3e-39	2.15e-37
Gh_A04G1238	159.997	2.24777	0.243012	9.24965	2.25e-20	7.29e-19
Gh_A12G0429	61.1261	2.247	0.359402	6.25205	4.05e-10	4.85e-09
Gh_A11G0374	71.6721	2.2417	0.351918	6.36995	1.89e-10	2.35e-09
Gh_A05G0732	21.7048	2.24111	0.403918	5.54843	2.88e-08	2.72e-07
Gh_D11G2312	19.3133	2.23992	0.439155	5.10053	3.39e-07	2.69e-06
Gh_D11G0056	44.457	2.23883	0.483947	4.62619	3.72e-06	2.5e-05
Gh_D10G1576	32.3849	2.23807	0.360399	6.20996	5.3e-10	6.28e-09
Gh_A04G0510	59.9133	2.2351	0.333144	6.70912	1.96e-11	2.75e-10
Gh_D13G0901	23.9239	2.23436	0.417496	5.35182	8.71e-08	7.59e-07
Gh_A13G1686	484.753	2.23332	0.322152	6.93249	4.13e-12	6.27e-11
Gh_D07G2479	446.145	2.23248	0.334613	6.67183	2.53e-11	3.5e-10
Gh_A12G1756	576.63	2.22967	0.153599	14.5162	9.57e-48	1.23e-45
Gh_D09G0276	20.8678	2.22864	0.442916	5.03175	4.86e-07	3.77e-06
Gh_A05G0387	142.737	2.22336	0.231974	9.58454	9.29e-22	3.35e-20
Gh_A02G0032	85.4089	2.22152	0.306741	7.24234	4.41e-13	7.45e-12
Gh_D01G1816	182.713	2.22143	0.263095	8.44346	3.08e-17	7.84e-16
Gh_A08G1574	56.0897	2.22032	0.341714	6.4976	8.16e-11	1.06e-09
Gh_D05G1125	25.055	2.22014	0.424404	5.2312	1.68e-07	1.4e-06
Gh_A06G0942	297.838	2.2201	0.160533	13.8295	1.69e-43	1.9e-41
Gh_D09G1102	17.8316	2.21959	0.493447	4.49813	6.86e-06	4.38e-05
Gh_A07G0992	47.5381	2.21952	0.386129	5.74814	9.02e-09	9.12e-08
Gh_D05G3128	129.496	2.21663	0.223929	9.89881	4.21e-23	1.66e-21
Gh_D08G1792	68.2015	2.21519	0.285032	7.77171	7.74e-15	1.59e-13
Gh_A05G1432	27078	2.21461	0.238887	9.27051	1.85e-20	6.05e-19
Gh_D11G0765	5312.46	2.21382	0.0985439	22.4653	9.07e-112	1.15e-108
Gh_A05G1616	82.182	2.21362	0.363806	6.08462	1.17e-09	1.32e-08
Gh_D13G1001	833.172	2.21343	0.17039	12.9904	1.39e-38	1.25e-36
Gh_A11G1542	394.108	2.21272	0.207209	10.6787	1.28e-26	6.36e-25
Gh_D05G0911	60.2633	2.20992	0.319841	6.90945	4.87e-12	7.31e-11
Gh_D13G0222	371.916	2.20828	0.182146	12.1237	7.91e-34	5.86e-32
Gh_D12G1617	56.7277	2.20734	0.309576	7.1302	1e-12	1.62e-11
Gh_A01G0978	10.4006	2.20507	0.500336	4.40717	1.05e-05	6.46e-05
Gh_A09G2245	57.2043	2.20385	0.310448	7.09893	1.26e-12	2.01e-11
Gh_A05G1264	33.8107	2.20373	0.410621	5.36683	8.01e-08	7.02e-07
Gh_D13G1084	829.467	2.20356	0.156487	14.0814	4.94e-45	5.83e-43
Gh_A13G1998	31.9461	2.20332	0.379651	5.80354	6.49e-09	6.7e-08
Gh_A10G2339	28.1664	2.20266	0.383127	5.74916	8.97e-09	9.07e-08
Gh_D05G1627	272.816	2.20222	0.20271	10.8639	1.71e-27	9.05e-26
Gh_A06G0381	398.28	2.20123	0.25717	8.55944	1.13e-17	3.01e-16
Gh_A06G1122	123.173	2.2001	0.2697	8.15756	3.42e-16	7.92e-15
Gh_A10G1417	826.201	2.19926	0.199751	11.0101	3.42e-28	1.89e-26
Gh_D12G1175	29.0813	2.19909	0.394472	5.57477	2.48e-08	2.36e-07
Gh_D13G2151	217.784	2.19901	0.380952	5.77242	7.81e-09	7.97e-08
Gh_D12G0494	45.4677	2.19884	0.304693	7.21658	5.33e-13	8.92e-12
Gh_A08G0543	41.443	2.19848	0.322477	6.81748	9.26e-12	1.35e-10
Gh_D07G1658	36.8859	2.19751	0.39385	5.57957	2.41e-08	2.3e-07
Gh_D08G2537	9.89532	2.1972	0.493903	4.44865	8.64e-06	5.42e-05
Gh_A09G1921	30.5304	2.19641	0.432006	5.08421	3.69e-07	2.91e-06
Gh_A04G0539	294.37	2.19629	0.197186	11.1382	8.18e-29	4.69e-27
Gh_D04G0379	164.129	2.19545	0.257871	8.51376	1.68e-17	4.39e-16
Gh_Sca013634G01	881.482	2.19543	0.214224	10.2483	1.2e-24	5.21e-23
Gh_A02G1528	130.692	2.19504	0.286833	7.65266	1.97e-14	3.86e-13
Gh_D12G2395	31.4666	2.19309	0.381719	5.7453	9.18e-09	9.27e-08
Gh_D11G0644	546.25	2.19283	0.189547	11.5688	5.93e-31	3.76e-29
Gh_D05G0051	24.4249	2.19262	0.475827	4.608	4.07e-06	2.71e-05
Gh_A11G0111	27.4882	2.19258	0.421301	5.2043	1.95e-07	1.6e-06
Gh_D04G0959	37.1614	2.19081	0.371504	5.89713	3.7e-09	3.95e-08
Gh_A12G1922	60.8345	2.19066	0.294985	7.42635	1.12e-13	2.02e-12
Gh_A10G0796	1713.7	2.19035	0.176248	12.4277	1.85e-35	1.47e-33
Gh_A06G0520	1903.77	2.18764	0.197898	11.0544	2.09e-28	1.17e-26
Gh_D06G0151	1119.9	2.18721	0.168943	12.9465	2.46e-38	2.2e-36
Gh_D10G0050	23.5835	2.1846	0.496839	4.39699	1.1e-05	6.75e-05
Gh_D03G1299	5.47684	2.18187	0.532958	4.09389	4.24e-05	0.000231523
Gh_D09G1791	276.851	2.18114	0.184477	11.8234	2.96e-32	2.01e-30
Gh_A10G0400	16.4116	2.1811	0.50323	4.33421	1.46e-05	8.81e-05
Gh_D12G2092	362.606	2.179	0.16303	13.3657	9.6e-41	9.55e-39
Gh_A03G0353	95.2598	2.17701	0.375009	5.80524	6.43e-09	6.63e-08
Gh_A10G0330	15.9582	2.17687	0.498359	4.36809	1.25e-05	7.62e-05
Gh_A13G0644	80.4349	2.17663	0.318188	6.84068	7.88e-12	1.16e-10
Gh_D13G1850	15.9261	2.17562	0.508992	4.27436	1.92e-05	0.000112772
Gh_D12G1070	79.9954	2.17194	0.314214	6.91231	4.77e-12	7.18e-11
Gh_A05G3806	618.791	2.17121	0.254451	8.53292	1.43e-17	3.74e-16
Gh_A10G2246	94.2255	2.17069	0.425702	5.09907	3.41e-07	2.71e-06
Gh_D09G0961	58.1424	2.16954	0.340611	6.36955	1.9e-10	2.36e-09
Gh_D07G1331	248.6	2.16711	0.224151	9.6681	4.12e-22	1.52e-20
Gh_A13G1002	9.68445	2.16568	0.517811	4.18238	2.88e-05	0.000163478
Gh_A12G1114	41.5163	2.16479	0.32963	6.56732	5.12e-11	6.78e-10
Gh_A03G0587	65.7759	2.16469	0.305337	7.08952	1.35e-12	2.15e-11
Gh_D10G1078	12.3248	2.16459	0.475702	4.5503	5.36e-06	3.49e-05
Gh_A13G0253	766.201	2.16434	0.132469	16.3384	5.26e-60	1.05e-57
Gh_D13G1634	35.5151	2.16424	0.395953	5.4659	4.61e-08	4.21e-07
Gh_A07G0392	424.116	2.1637	0.175767	12.3101	8e-35	6.17e-33
Gh_D03G0578	17.7345	2.16356	0.452195	4.78458	1.71e-06	1.22e-05
Gh_A11G2044	61.5322	2.16301	0.273462	7.90971	2.58e-15	5.5e-14
Gh_A11G0303	674.668	2.16088	0.170044	12.7078	5.35e-37	4.55e-35
Gh_D07G1619	552.331	2.16054	0.143455	15.0608	2.93e-51	4.32e-49
Gh_A11G3233	105.409	2.1603	0.297594	7.25922	3.89e-13	6.63e-12
Gh_D04G1861	128.663	2.15941	0.274889	7.85559	3.98e-15	8.34e-14
Gh_Sca210283G01	18.1156	2.15861	0.446062	4.83926	1.3e-06	9.45e-06
Gh_D10G1362	164.661	2.15701	0.27527	7.83599	4.65e-15	9.7e-14
Gh_D07G2259	11.9443	2.15607	0.516577	4.17377	3e-05	0.000169217
Gh_D07G2028	22.886	2.15548	0.433967	4.96693	6.8e-07	5.15e-06
Gh_D09G2129	59.3807	2.15249	0.278254	7.73572	1.03e-14	2.08e-13
Gh_D08G0169	1330.44	2.14879	0.166754	12.8859	5.4e-38	4.8e-36
Gh_D09G2123	17.7439	2.14619	0.444965	4.82328	1.41e-06	1.02e-05
Gh_A06G0365	355.802	2.14579	0.202779	10.5819	3.62e-26	1.75e-24
Gh_A02G0400	400.519	2.1445	0.43729	4.90408	9.39e-07	6.95e-06
Gh_A03G0935	6741.19	2.14265	0.1234	17.3634	1.56e-67	4.3e-65
Gh_A08G2306	184.362	2.14077	0.22371	9.56941	1.08e-21	3.85e-20
Gh_D10G0637	71.3654	2.13981	0.28951	7.39115	1.46e-13	2.61e-12
Gh_A03G1123	138.495	2.13906	0.24798	8.62593	6.36e-18	1.72e-16
Gh_A06G0526	118.995	2.13742	0.239052	8.94123	3.85e-19	1.15e-17
Gh_D11G1480	70.5959	2.13652	0.319249	6.69232	2.2e-11	3.07e-10
Gh_D01G0045	63.0309	2.13602	0.430335	4.96361	6.92e-07	5.23e-06
Gh_D06G0396	654.231	2.13538	0.15438	13.832	1.64e-43	1.84e-41
Gh_A05G3538	291.677	2.13125	0.219829	9.69505	3.16e-22	1.17e-20
Gh_A07G0485	3822.54	2.12846	0.148837	14.3006	2.17e-46	2.69e-44
Gh_A13G0049	288.496	2.12815	0.34654	6.14114	8.19e-10	9.48e-09
Gh_A01G0582	24.8114	2.1273	0.467992	4.54558	5.48e-06	3.56e-05
Gh_A12G0181	128.861	2.12677	0.314738	6.75728	1.41e-11	2.01e-10
Gh_D05G1248	90.4224	2.12642	0.262911	8.08799	6.07e-16	1.38e-14
Gh_A06G0605	242.382	2.12629	0.20727	10.2586	1.08e-24	4.71e-23
Gh_D11G1394	881.795	2.12475	0.245971	8.63824	5.71e-18	1.55e-16
Gh_A12G0029	51.9738	2.12392	0.369537	5.74751	9.06e-09	9.15e-08
Gh_D08G2555	89.1505	2.1231	0.252708	8.40142	4.41e-17	1.1e-15
Gh_A08G2509	1681.14	2.1225	0.174377	12.1719	4.39e-34	3.28e-32
Gh_D13G2284	12.8747	2.12097	0.493978	4.29366	1.76e-05	0.000104129
Gh_D01G1911	499.187	2.12061	0.1699	12.4815	9.41e-36	7.59e-34
Gh_A10G0603	3041.71	2.12051	0.105104	20.1754	1.61e-90	1.01e-87
Gh_A05G2932	280.142	2.12033	0.241995	8.76188	1.92e-18	5.41e-17
Gh_A08G0505	210.737	2.12007	0.204253	10.3797	3.07e-25	1.38e-23
Gh_D13G1493	1005.77	2.11972	0.205034	10.3384	4.72e-25	2.09e-23
Gh_A08G1883	59.3891	2.11813	0.326858	6.48029	9.15e-11	1.18e-09
Gh_D12G1101	635.698	2.11734	0.208898	10.1358	3.83e-24	1.61e-22
Gh_D09G0145	4785	2.11574	0.129184	16.3777	2.76e-60	5.68e-58
Gh_A08G0144	6.19432	2.11386	0.527228	4.0094	6.09e-05	0.000322352
Gh_D13G1587	55.656	2.11385	0.289016	7.31395	2.59e-13	4.51e-12
Gh_A04G1184	78.7517	2.11259	0.245933	8.59012	8.69e-18	2.32e-16
Gh_A10G0741	22.2449	2.11154	0.465434	4.53672	5.71e-06	3.7e-05
Gh_D06G0715	13.8494	2.11137	0.483528	4.36658	1.26e-05	7.66e-05
Gh_A06G1481	866.516	2.10857	0.15566	13.5461	8.36e-42	8.76e-40
Gh_D02G0879	44.3564	2.10795	0.434615	4.85015	1.23e-06	8.98e-06
Gh_A06G0054	81.6274	2.10648	0.353439	5.95996	2.52e-09	2.75e-08
Gh_A04G0446	72.5739	2.10628	0.365596	5.76122	8.35e-09	8.48e-08
Gh_D02G1319	9036.63	2.10561	0.124354	16.9323	2.6e-64	6.31e-62
Gh_A12G0622	124.919	2.1046	0.277496	7.58425	3.34e-14	6.43e-13
Gh_A07G1573	44.886	2.1027	0.348837	6.02775	1.66e-09	1.85e-08
Gh_A11G1195	249.813	2.10246	0.252792	8.31698	9.02e-17	2.2e-15
Gh_Sca135309G01	34.0021	2.10172	0.504161	4.16875	3.06e-05	0.000172596
Gh_A07G0211	33.996	2.1	0.41284	5.08672	3.64e-07	2.88e-06
Gh_A05G3226	504.643	2.0979	0.233994	8.9656	3.09e-19	9.26e-18
Gh_D12G0266	1405.2	2.09744	0.160423	13.0744	4.61e-39	4.27e-37
Gh_D09G2163	80.4878	2.09693	0.316609	6.62309	3.52e-11	4.78e-10
Gh_D06G2148	458.964	2.09292	0.190185	11.0047	3.63e-28	2e-26
Gh_D02G1715	91.2969	2.08994	0.275374	7.58945	3.21e-14	6.19e-13
Gh_D08G2548	419.228	2.08792	0.196782	10.6104	2.67e-26	1.31e-24
Gh_A03G0601	259.924	2.08732	0.164002	12.7274	4.16e-37	3.57e-35
Gh_D07G0238	32.0516	2.08693	0.383106	5.44739	5.11e-08	4.63e-07
Gh_A02G0680	54.9989	2.08528	0.348871	5.97723	2.27e-09	2.49e-08
Gh_A10G0931	91.5947	2.08002	0.334599	6.21644	5.09e-10	6.04e-09
Gh_D10G1638	89.5899	2.0795	0.34997	5.94193	2.82e-09	3.05e-08
Gh_D05G2973	54.4599	2.07882	0.386693	5.3759	7.62e-08	6.71e-07
Gh_D12G2004	43.0925	2.07806	0.332052	6.25824	3.89e-10	4.67e-09
Gh_A09G1854	4565.37	2.07761	0.143315	14.4968	1.27e-47	1.62e-45
Gh_A09G1551	134.326	2.0776	0.250031	8.30934	9.62e-17	2.33e-15
Gh_A06G1248	38.2744	2.07379	0.446351	4.6461	3.38e-06	2.29e-05
Gh_D11G1022	285.766	2.07169	0.193688	10.696	1.06e-26	5.3e-25
Gh_A08G2106	291.761	2.07111	0.318525	6.50221	7.92e-11	1.03e-09
Gh_D12G0293	22.6746	2.0705	0.444324	4.65988	3.16e-06	2.15e-05
Gh_A13G0294	13521.2	2.07014	0.166387	12.4417	1.55e-35	1.23e-33
Gh_D13G1674	205.137	2.06963	0.20923	9.89164	4.53e-23	1.77e-21
Gh_A02G1199	142.162	2.06911	0.290801	7.11522	1.12e-12	1.8e-11
Gh_A03G1568	89.3995	2.06821	0.266057	7.77357	7.63e-15	1.56e-13
Gh_A05G1007	230.625	2.06774	0.319506	6.47166	9.69e-11	1.24e-09
Gh_A07G1093	97.7883	2.06752	0.310233	6.66441	2.66e-11	3.67e-10
Gh_A08G0995	54.6758	2.06744	0.316469	6.53286	6.45e-11	8.45e-10
Gh_D01G1937	142.961	2.06554	0.249887	8.2659	1.39e-16	3.32e-15
Gh_A08G1892	174.381	2.06482	0.31156	6.62736	3.42e-11	4.65e-10
Gh_A05G4020	130.414	2.0646	0.242732	8.50571	1.8e-17	4.69e-16
Gh_A11G1247	839.239	2.0628	0.248291	8.30799	9.73e-17	2.36e-15
Gh_A08G0213	92.2327	2.06247	0.290714	7.0945	1.3e-12	2.07e-11
Gh_D02G1910	49.8805	2.0574	0.300854	6.83853	8e-12	1.17e-10
Gh_A07G1964	28.5988	2.05727	0.454074	4.53069	5.88e-06	3.8e-05
Gh_A10G0163	46.3541	2.05534	0.328229	6.26192	3.8e-10	4.57e-09
Gh_D05G1128	45.4886	2.0537	0.375323	5.47181	4.45e-08	4.08e-07
Gh_D01G0593	8.58281	2.05111	0.528427	3.88154	0.000103797	0.000522763
Gh_D13G2489	3617.88	2.05097	0.233598	8.77991	1.64e-18	4.65e-17
Gh_D01G2224	283.269	2.04965	0.414221	4.94821	7.49e-07	5.64e-06
Gh_D11G0584	147.147	2.04958	0.217393	9.42799	4.18e-21	1.44e-19
Gh_Sca160083G01	27.0762	2.04827	0.475256	4.30983	1.63e-05	9.74e-05
Gh_A09G0275	26.1051	2.04795	0.390255	5.24773	1.54e-07	1.29e-06
Gh_D09G0552	75.7412	2.04779	0.277859	7.3699	1.71e-13	3.04e-12
Gh_D11G1526	22.0788	2.04541	0.428884	4.76915	1.85e-06	1.31e-05
Gh_D07G1832	5152.56	2.043	0.189153	10.8008	3.41e-27	1.76e-25
Gh_D01G0708	96.0394	2.0422	0.252207	8.09729	5.62e-16	1.28e-14
Gh_A11G1668	109.444	2.04124	0.284526	7.17419	7.27e-13	1.2e-11
Gh_A07G0616	1516.25	2.04014	0.157332	12.9671	1.88e-38	1.69e-36
Gh_A05G1902	197.493	2.03792	0.444388	4.58591	4.52e-06	2.99e-05
Gh_A12G0951	8.14334	2.03673	0.505724	4.02735	5.64e-05	0.000300956
Gh_A04G0623	25920.3	2.03664	0.150348	13.5461	8.35e-42	8.76e-40
Gh_A13G0050	662.794	2.03515	0.355957	5.7174	1.08e-08	1.08e-07
Gh_D06G0644	23.2783	2.0348	0.440113	4.62336	3.78e-06	2.53e-05
Gh_A08G2483	724.144	2.03478	0.200039	10.172	2.65e-24	1.12e-22
Gh_D04G1682	114.114	2.03256	0.223212	9.10593	8.55e-20	2.66e-18
Gh_D13G0235	299.419	2.03193	0.232644	8.73407	2.46e-18	6.86e-17
Gh_A08G0364	23.5736	2.03177	0.405381	5.012	5.39e-07	4.15e-06
Gh_D12G0866	32.4942	2.03165	0.366927	5.53692	3.08e-08	2.89e-07
Gh_D06G1488	98.2517	2.03146	0.261841	7.75837	8.6e-15	1.75e-13
Gh_A09G1938	22.7847	2.03051	0.40691	4.99008	6.04e-07	4.62e-06
Gh_A07G1270	674.077	2.02923	0.13796	14.7088	5.66e-49	7.57e-47
Gh_A01G2140	106.762	2.02651	0.294363	6.88439	5.8e-12	8.64e-11
Gh_Sca112508G01	45.2283	2.02643	0.463002	4.37671	1.2e-05	7.35e-05
Gh_D12G1630	8.29574	2.02339	0.525439	3.85085	0.000117709	0.000585839
Gh_Sca005055G02	56.6765	2.02032	0.296922	6.80423	1.02e-11	1.47e-10
Gh_D12G1769	103.042	2.01912	0.264479	7.63433	2.27e-14	4.43e-13
Gh_D11G2349	52.4985	2.0185	0.311583	6.4782	9.28e-11	1.19e-09
Gh_A06G0791	1473.76	2.01788	0.150545	13.4038	5.74e-41	5.74e-39
Gh_D06G1290	8.62412	2.01753	0.51888	3.88824	0.000100973	0.000509789
Gh_D11G3177	35.9913	2.01753	0.35621	5.66387	1.48e-08	1.45e-07
Gh_A10G0450	352.067	2.01581	0.149989	13.4397	3.54e-41	3.58e-39
Gh_A06G1081	339.672	2.01381	0.178992	11.2508	2.29e-29	1.35e-27
Gh_D08G2170	102.192	2.01305	0.21957	9.16813	4.81e-20	1.52e-18
Gh_D05G2939	165.737	2.01247	0.207955	9.67743	3.76e-22	1.39e-20
Gh_D10G2037	198.815	2.01161	0.265643	7.57259	3.66e-14	7e-13
Gh_A07G2037	240.01	2.01147	0.187509	10.7273	7.58e-27	3.81e-25
Gh_D10G1678	1716.59	2.00983	0.143379	14.0177	1.22e-44	1.42e-42
Gh_D05G2339	154.937	2.00939	0.216924	9.26312	1.99e-20	6.46e-19
Gh_D10G0326	64.2997	2.00891	0.287547	6.98637	2.82e-12	4.34e-11
Gh_A05G3606	66.2381	2.00868	0.273419	7.34654	2.03e-13	3.58e-12
Gh_D08G2293	210.739	2.00867	0.267525	7.50835	5.99e-14	1.12e-12
Gh_D06G0412	229.717	2.00795	0.168313	11.9299	8.27e-33	5.83e-31
Gh_A01G1731	16.5361	2.0072	0.415057	4.83598	1.32e-06	9.59e-06
Gh_A08G1372	232.396	2.00597	0.209223	9.58773	9e-22	3.25e-20
Gh_A04G0266	40.333	2.00533	0.429172	4.67255	2.97e-06	2.03e-05
Gh_D03G0862	143.48	2.00506	0.219013	9.15497	5.44e-20	1.71e-18
Gh_A01G1291	487.816	2.00358	0.209807	9.54961	1.3e-21	4.63e-20
Gh_A05G3192	29.4987	2.00067	0.406693	4.91937	8.68e-07	6.47e-06
Gh_A07G1742	3616.43	2.00066	0.207376	9.64749	5.04e-22	1.84e-20
Gh_D11G2406	15.7398	1.99907	0.474968	4.20885	2.57e-05	0.000146798
Gh_A05G3783	179.381	1.99877	0.173734	11.5048	1.25e-30	7.77e-29
Gh_D12G0044	62.8175	1.99828	0.316636	6.31096	2.77e-10	3.38e-09
Gh_A05G0945	403.173	1.99769	0.164436	12.1488	5.82e-34	4.35e-32
Gh_A01G0876	202.104	1.99749	0.259053	7.71076	1.25e-14	2.51e-13
Gh_A09G2140	299.784	1.99709	0.185665	10.7564	5.53e-27	2.8e-25
Gh_A01G1768	98.5734	1.99571	0.305146	6.5402	6.14e-11	8.08e-10
Gh_A12G1513	68.6279	1.99374	0.529053	3.76852	0.000164221	0.0007912
Gh_D05G1475	544.219	1.99258	0.130842	15.2288	2.28e-52	3.5e-50
Gh_D03G1165	248.661	1.99203	0.203732	9.77771	1.4e-22	5.33e-21
Gh_D02G1741	93.9947	1.99176	0.247766	8.0389	9.06e-16	2.02e-14
Gh_D07G2452	7.44789	1.99135	0.484651	4.10884	3.98e-05	0.000218505
Gh_A05G1282	1837.08	1.98937	0.171951	11.5694	5.89e-31	3.74e-29
Gh_D11G2525	2531.6	1.98747	0.149439	13.2995	2.33e-40	2.28e-38
Gh_A05G1453	235.848	1.98736	0.22094	8.99501	2.36e-19	7.14e-18
Gh_D03G0738	3696.83	1.98708	0.303805	6.54066	6.12e-11	8.05e-10
Gh_A08G2502	137.066	1.98639	0.20895	9.50653	1.97e-21	6.93e-20
Gh_Sca064706G01	17.1282	1.98631	0.460387	4.31444	1.6e-05	9.55e-05
Gh_A11G2864	212.384	1.98375	0.174082	11.3955	4.4e-30	2.67e-28
Gh_A01G1566	132.25	1.98371	0.235863	8.41042	4.09e-17	1.03e-15
Gh_A03G0596	55.3374	1.98356	0.328547	6.03736	1.57e-09	1.75e-08
Gh_D07G2187	239.106	1.9827	0.219482	9.03354	1.66e-19	5.08e-18
Gh_D13G0680	3839.16	1.9826	0.176892	11.2079	3.73e-29	2.17e-27
Gh_A01G1420	59.9038	1.98197	0.327065	6.05985	1.36e-09	1.53e-08
Gh_A10G0552	19.5593	1.98015	0.448239	4.41762	9.98e-06	6.19e-05
Gh_A12G0634	36.681	1.97923	0.397174	4.98328	6.25e-07	4.76e-06
Gh_D01G0639	128.271	1.97871	0.274714	7.20281	5.9e-13	9.81e-12
Gh_A01G0897	361.44	1.97766	0.200309	9.87304	5.45e-23	2.12e-21
Gh_A02G0044	111.042	1.97647	0.24554	8.04949	8.31e-16	1.86e-14
Gh_A12G1909	1651.84	1.97568	0.168473	11.727	9.27e-32	6.1e-30
Gh_A10G2137	47.0318	1.97557	0.321307	6.14853	7.82e-10	9.07e-09
Gh_D05G1562	27.6438	1.97473	0.473508	4.17043	3.04e-05	0.000171404
Gh_A02G0523	12.8326	1.97173	0.4931	3.99865	6.37e-05	0.00033582
Gh_A02G0307	40.853	1.9698	0.40102	4.91196	9.02e-07	6.7e-06
Gh_A10G0203	267.307	1.96888	0.161581	12.1851	3.73e-34	2.8e-32
Gh_A13G0867	101.106	1.96832	0.199896	9.8467	7.08e-23	2.73e-21
Gh_Sca013455G01	37.4611	1.96772	0.383728	5.12791	2.93e-07	2.35e-06
Gh_D07G1340	133.575	1.96611	0.462786	4.24843	2.15e-05	0.000125214
Gh_A05G1305	300.074	1.9657	0.183979	10.6844	1.2e-26	6e-25
Gh_A05G3692	1417.28	1.96518	0.141977	13.8416	1.43e-43	1.62e-41
Gh_A12G0978	35.6872	1.9649	0.423428	4.64046	3.48e-06	2.35e-05
Gh_D06G1752	216.984	1.96489	0.196675	9.99055	1.68e-23	6.72e-22
Gh_A07G1741	1414.71	1.96489	0.201218	9.76496	1.59e-22	6.02e-21
Gh_A10G1707	310.504	1.96426	0.285909	6.87022	6.41e-12	9.52e-11
Gh_A06G1085	869.992	1.96218	0.194472	10.0898	6.13e-24	2.53e-22
Gh_A01G1964	250.753	1.96143	0.538092	3.64516	0.000267229	0.00122397
Gh_A05G0133	32.0206	1.96022	0.355557	5.51309	3.53e-08	3.28e-07
Gh_D09G2285	473.94	1.95897	0.391427	5.00469	5.6e-07	4.3e-06
Gh_D12G0159	566.056	1.95846	0.227719	8.60033	7.95e-18	2.13e-16
Gh_A08G1049	122.833	1.95819	0.219664	8.91444	4.9e-19	1.45e-17
Gh_D12G2308	57.9103	1.95787	0.3136	6.24323	4.29e-10	5.13e-09
Gh_A03G0088	136.794	1.95713	0.282484	6.92827	4.26e-12	6.45e-11
Gh_A05G1986	289.505	1.95586	0.186358	10.4952	9.09e-26	4.24e-24
Gh_A11G2033	58.2067	1.95531	0.307049	6.36808	1.91e-10	2.38e-09
Gh_D11G3353	162.51	1.95464	0.230111	8.49433	1.99e-17	5.15e-16
Gh_D04G0463	216.963	1.95362	0.18401	10.617	2.49e-26	1.22e-24
Gh_A10G1372	114.47	1.9518	0.248413	7.85709	3.93e-15	8.25e-14
Gh_A09G1107	2520.76	1.95051	0.146924	13.2756	3.21e-40	3.11e-38
Gh_A05G2917	36.3739	1.95002	0.364565	5.34891	8.85e-08	7.71e-07
Gh_D05G2316	27.9803	1.94904	0.476904	4.08686	4.37e-05	0.000237937
Gh_A05G2699	102.675	1.9484	0.222393	8.76109	1.93e-18	5.44e-17
Gh_D12G1334	198.228	1.94795	0.222207	8.76637	1.85e-18	5.21e-17
Gh_D05G2893	905.559	1.94753	0.173347	11.2349	2.75e-29	1.61e-27
Gh_D04G0604	25.877	1.94687	0.39074	4.98252	6.28e-07	4.78e-06
Gh_D12G1968	634.875	1.94539	0.136836	14.217	7.19e-46	8.68e-44
Gh_A11G2823	74.6562	1.94531	0.291281	6.67846	2.41e-11	3.35e-10
Gh_A05G3847	83.6195	1.94334	0.254932	7.62299	2.48e-14	4.82e-13
Gh_D07G1381	691.561	1.94254	0.15766	12.321	6.98e-35	5.39e-33
Gh_D06G1655	76.3529	1.94236	0.282746	6.86962	6.44e-12	9.55e-11
Gh_D10G0256	81.4807	1.9422	0.335005	5.79753	6.73e-09	6.93e-08
Gh_A13G1722	351.212	1.941	0.173577	11.1824	4.97e-29	2.88e-27
Gh_D10G0059	367.213	1.94098	0.252924	7.67415	1.67e-14	3.29e-13
Gh_A02G0910	31.2324	1.94014	0.377592	5.1382	2.77e-07	2.23e-06
Gh_D08G2489	25.2774	1.94	0.509543	3.80733	0.000140476	0.000686858
Gh_A08G0449	152.547	1.93961	0.422597	4.58975	4.44e-06	2.94e-05
Gh_A02G0445	26.603	1.93763	0.431598	4.48944	7.14e-06	4.54e-05
Gh_D06G0826	72.9865	1.93745	0.367767	5.26814	1.38e-07	1.16e-06
Gh_A10G0594	2800.04	1.93725	0.145751	13.2914	2.6e-40	2.53e-38
Gh_D05G3393	191.906	1.93717	0.235597	8.22239	1.99e-16	4.71e-15
Gh_A01G0626	68.7813	1.93619	0.311758	6.21055	5.28e-10	6.26e-09
Gh_D09G2148	257.788	1.9356	0.193545	10.0008	1.51e-23	6.06e-22
Gh_D04G1465	32.4493	1.93474	0.382593	5.05691	4.26e-07	3.34e-06
Gh_D11G1474	124.174	1.93406	0.280158	6.90346	5.08e-12	7.6e-11
Gh_A04G1102	164.927	1.93354	0.278589	6.94046	3.91e-12	5.93e-11
Gh_A10G0875	800.803	1.93238	0.271499	7.11746	1.1e-12	1.77e-11
Gh_D10G0820	1017.21	1.9318	0.171443	11.2679	1.89e-29	1.12e-27
Gh_A05G2128	5712.8	1.93039	0.127149	15.182	4.65e-52	7.06e-50
Gh_A02G0189	193.339	1.92863	0.265394	7.26705	3.67e-13	6.28e-12
Gh_D08G1958	78.3994	1.9285	0.295031	6.53661	6.29e-11	8.26e-10
Gh_A04G1404	1550.71	1.92754	0.140141	13.7543	4.8e-43	5.31e-41
Gh_A07G1706	398.474	1.92686	0.304752	6.32271	2.57e-10	3.15e-09
Gh_D05G0713	13.6594	1.92608	0.496357	3.88043	0.00010427	0.000524878
Gh_D08G1584	134.485	1.926	0.278067	6.9264	4.32e-12	6.53e-11
Gh_D03G0181	63.0244	1.92586	0.382303	5.03752	4.72e-07	3.67e-06
Gh_A08G1996	74.4308	1.92559	0.299344	6.43268	1.25e-10	1.59e-09
Gh_A05G1121	336.438	1.92443	0.20112	9.56856	1.08e-21	3.88e-20
Gh_Sca010075G01	29.9394	1.92394	0.421762	4.56167	5.07e-06	3.32e-05
Gh_A10G0107	600.629	1.92374	0.233621	8.23445	1.8e-16	4.28e-15
Gh_A13G0825	160.942	1.92307	0.387148	4.96726	6.79e-07	5.14e-06
Gh_D13G2371	10.2533	1.92252	0.504864	3.80799	0.000140103	0.000685485
Gh_D11G2953	403.081	1.92177	0.392872	4.8916	1e-06	7.38e-06
Gh_D02G1552	188.141	1.92127	0.177476	10.8255	2.61e-27	1.35e-25
Gh_D03G1059	33.8202	1.91983	0.412122	4.65841	3.19e-06	2.17e-05
Gh_D12G0097	85.5674	1.91917	0.373431	5.1393	2.76e-07	2.22e-06
Gh_A04G1413	341.575	1.91752	0.196652	9.75085	1.83e-22	6.88e-21
Gh_A12G0749	53.2166	1.91575	0.334124	5.73366	9.83e-09	9.87e-08
Gh_A04G1001	72.823	1.91568	0.285171	6.71765	1.85e-11	2.6e-10
Gh_D11G0518	44.0684	1.91493	0.444256	4.31042	1.63e-05	9.72e-05
Gh_A11G0669	146.905	1.91486	0.20639	9.27787	1.73e-20	5.65e-19
Gh_A01G0484	50.7066	1.91474	0.328061	5.83654	5.33e-09	5.56e-08
Gh_Sca047995G01	17.6817	1.91458	0.454855	4.2092	2.56e-05	0.000146624
Gh_D05G2069	154.428	1.91285	0.243402	7.8588	3.88e-15	8.14e-14
Gh_A03G1800	89.093	1.91275	0.291635	6.5587	5.43e-11	7.17e-10
Gh_A07G1228	17.9539	1.91266	0.507841	3.76625	0.000165715	0.000797749
Gh_A08G2171	19.4139	1.91249	0.425505	4.49463	6.97e-06	4.44e-05
Gh_A04G1075	80.7085	1.91239	0.27339	6.99508	2.65e-12	4.09e-11
Gh_A11G2856	3532.93	1.91212	0.116454	16.4196	1.38e-60	2.9e-58
Gh_D04G1143	445.708	1.91037	0.18838	10.141	3.63e-24	1.53e-22
Gh_D12G1827	473.847	1.90778	0.129805	14.6973	6.71e-49	8.92e-47
Gh_D09G1215	307.496	1.90586	0.19284	9.88312	4.93e-23	1.92e-21
Gh_A13G0693	387.091	1.90478	0.211529	9.0048	2.16e-19	6.55e-18
Gh_D11G1371	26.4342	1.90477	0.443693	4.29299	1.76e-05	0.000104391
Gh_D03G0568	133.366	1.90139	0.248544	7.65011	2.01e-14	3.94e-13
Gh_A08G2029	385.677	1.90113	0.185226	10.2639	1.03e-24	4.46e-23
Gh_D05G2395	70.7475	1.90085	0.334645	5.68019	1.35e-08	1.33e-07
Gh_A11G3302	16.8796	1.89988	0.512459	3.70737	0.000209422	0.000984506
Gh_D06G2208	228.397	1.8971	0.324955	5.83803	5.28e-09	5.51e-08
Gh_A11G0649	66.3414	1.89612	0.316646	5.98814	2.12e-09	2.34e-08
Gh_D05G2384	6672.78	1.8951	0.131491	14.4124	4.33e-47	5.43e-45
Gh_A06G1664	529.965	1.89482	0.195276	9.7033	2.92e-22	1.08e-20
Gh_A08G1835	485.773	1.89412	0.172741	10.9651	5.62e-28	3.05e-26
Gh_A03G0597	1921.44	1.89391	0.110535	17.1341	8.26e-66	2.14e-63
Gh_D08G1556	2253.63	1.89305	0.171991	11.0066	3.55e-28	1.96e-26
Gh_D12G1670	200.21	1.89222	0.197888	9.56206	1.15e-21	4.12e-20
Gh_A05G0745	117.667	1.89037	0.260156	7.2663	3.69e-13	6.32e-12
Gh_D01G2272	44.0647	1.88885	0.347415	5.43685	5.42e-08	4.89e-07
Gh_D10G1398	60.9036	1.88698	0.402834	4.68426	2.81e-06	1.93e-05
Gh_D11G0127	27.6068	1.88388	0.386319	4.87649	1.08e-06	7.93e-06
Gh_D08G0670	677.041	1.88356	0.186309	10.1099	4.99e-24	2.08e-22
Gh_A11G2478	33.7046	1.88316	0.336981	5.58833	2.29e-08	2.19e-07
Gh_D12G0634	116.447	1.88304	0.241044	7.81201	5.63e-15	1.16e-13
Gh_D08G0931	275.894	1.8817	0.199481	9.43294	3.99e-21	1.38e-19
Gh_A05G3189	126.022	1.88158	0.266146	7.06975	1.55e-12	2.46e-11
Gh_D06G0146	96.9511	1.88106	0.255083	7.37431	1.65e-13	2.94e-12
Gh_A13G1390	1739.51	1.87959	0.139868	13.4383	3.61e-41	3.64e-39
Gh_A12G2691	76.2496	1.87919	0.247078	7.60566	2.83e-14	5.5e-13
Gh_D01G2138	43.8375	1.87702	0.434087	4.32406	1.53e-05	9.19e-05
Gh_A12G0186	131.855	1.87676	0.260256	7.21123	5.54e-13	9.25e-12
Gh_A13G0818	975.047	1.87657	0.164818	11.3857	4.93e-30	2.98e-28
Gh_D10G1316	4562.3	1.87656	0.157019	11.9512	6.4e-33	4.55e-31
Gh_D08G0322	161.097	1.87644	0.216709	8.65879	4.77e-18	1.3e-16
Gh_D02G0497	58.753	1.87608	0.355712	5.27415	1.33e-07	1.13e-06
Gh_A10G0706	51.564	1.87581	0.44992	4.1692	3.06e-05	0.000172268
Gh_D04G0574	26.9921	1.87508	0.504264	3.71845	0.000200451	0.000946921
Gh_D06G2233	692.67	1.87456	0.172578	10.8621	1.75e-27	9.21e-26
Gh_A11G1206	48.0694	1.87435	0.416389	4.50145	6.75e-06	4.32e-05
Gh_A08G1839	185.663	1.87259	0.221631	8.44913	2.93e-17	7.48e-16
Gh_D06G0571	482.941	1.87257	0.148323	12.625	1.54e-36	1.28e-34
Gh_A10G0329	13.3706	1.87208	0.477638	3.91945	8.88e-05	0.000452852
Gh_A13G2138	317.794	1.87008	0.181858	10.2832	8.39e-25	3.67e-23
Gh_A05G1633	150.152	1.86962	0.2798	6.68197	2.36e-11	3.28e-10
Gh_D11G0785	161.892	1.86916	0.215553	8.67148	4.27e-18	1.17e-16
Gh_D04G1473	96.8896	1.86813	0.283021	6.60068	4.09e-11	5.51e-10
Gh_A08G0248	15.9362	1.86785	0.490045	3.8116	0.000138071	0.0006761
Gh_D09G0398	23.0959	1.86784	0.382916	4.87793	1.07e-06	7.88e-06
Gh_A08G1884	88.2646	1.86765	0.280216	6.66503	2.65e-11	3.65e-10
Gh_A13G2241	541.254	1.86711	0.167343	11.1574	6.59e-29	3.79e-27
Gh_D12G2560	417.871	1.86433	0.145975	12.7715	2.36e-37	2.05e-35
Gh_A03G0894	385.365	1.86415	0.255676	7.29104	3.08e-13	5.31e-12
Gh_A12G0431	251.874	1.86068	0.176016	10.5711	4.06e-26	1.95e-24
Gh_A08G2383	62.0517	1.86017	0.321499	5.78591	7.21e-09	7.39e-08
Gh_A05G0658	978.762	1.85914	0.145509	12.7768	2.21e-37	1.91e-35
Gh_A09G0553	109.372	1.85867	0.271031	6.85779	6.99e-12	1.03e-10
Gh_D05G3773	61.794	1.85713	0.280683	6.61648	3.68e-11	4.98e-10
Gh_D02G1765	213.828	1.85586	0.255911	7.25195	4.11e-13	6.97e-12
Gh_D12G2832	111.862	1.85576	0.283865	6.53747	6.26e-11	8.22e-10
Gh_A04G1120	163.834	1.85544	0.236157	7.8568	3.94e-15	8.26e-14
Gh_Sca010496G01	33.0157	1.85479	0.367954	5.04084	4.64e-07	3.61e-06
Gh_A13G0390	61.3826	1.85443	0.320095	5.79338	6.9e-09	7.09e-08
Gh_A06G0569	21.9823	1.85422	0.439966	4.21445	2.5e-05	0.000143572
Gh_D13G2397	32.9866	1.85399	0.411733	4.5029	6.7e-06	4.29e-05
Gh_D13G2505	914.052	1.85209	0.122976	15.0606	2.94e-51	4.32e-49
Gh_D13G1593	39.3682	1.85055	0.377013	4.90846	9.18e-07	6.81e-06
Gh_Sca067707G01	55.8403	1.85026	0.394989	4.68434	2.81e-06	1.92e-05
Gh_D12G2762	36.9587	1.84945	0.343663	5.38159	7.38e-08	6.51e-07
Gh_A08G1934	63.4489	1.84835	0.293304	6.30181	2.94e-10	3.57e-09
Gh_A10G0415	88.5135	1.8482	0.389269	4.74787	2.06e-06	1.44e-05
Gh_A02G0431	19.7537	1.84698	0.439857	4.19904	2.68e-05	0.000152818
Gh_D06G2283	5645.95	1.84648	0.213278	8.65762	4.82e-18	1.31e-16
Gh_A06G1770	1194.34	1.84428	0.178234	10.3475	4.3e-25	1.91e-23
Gh_D11G3518	155.639	1.84422	0.288495	6.39256	1.63e-10	2.05e-09
Gh_D01G0242	88.6247	1.84395	0.262691	7.01947	2.23e-12	3.48e-11
Gh_A01G0276	309.209	1.84357	0.384903	4.78971	1.67e-06	1.19e-05
Gh_D05G1198	396.604	1.84339	0.15122	12.1901	3.51e-34	2.64e-32
Gh_D07G1906	485.128	1.84254	0.227806	8.08818	6.06e-16	1.38e-14
Gh_A09G0592	17.9862	1.84213	0.414388	4.44542	8.77e-06	5.5e-05
Gh_A12G0266	125.838	1.8416	0.211242	8.71795	2.83e-18	7.86e-17
Gh_D02G0750	315.96	1.84119	0.241794	7.6147	2.64e-14	5.13e-13
Gh_A05G1395	34.1107	1.84071	0.385612	4.77347	1.81e-06	1.28e-05
Gh_A03G2015	125.341	1.84042	0.317721	5.79255	6.93e-09	7.12e-08
Gh_A09G1750	282.167	1.84028	0.185954	9.89639	4.32e-23	1.69e-21
Gh_D04G1710	249.829	1.83933	0.228788	8.03945	9.02e-16	2.01e-14
Gh_D12G2728	170.654	1.83858	0.255665	7.19136	6.42e-13	1.06e-11
Gh_D07G0556	3173.81	1.8385	0.131452	13.9861	1.89e-44	2.19e-42
Gh_D01G0073	10.8665	1.83815	0.472114	3.89344	9.88e-05	0.000499874
Gh_Sca118831G01	96.1908	1.8376	0.381425	4.81773	1.45e-06	1.04e-05
Gh_D10G0708	147.903	1.83728	0.286952	6.40275	1.53e-10	1.92e-09
Gh_D06G0620	14.6737	1.83623	0.444689	4.12925	3.64e-05	0.000201804
Gh_A07G0780	364.096	1.8339	0.18604	9.85756	6.36e-23	2.47e-21
Gh_Sca005564G01	8.89713	1.83242	0.526092	3.48307	0.000495698	0.00212674
Gh_A03G1364	554.568	1.83144	0.195459	9.36995	7.26e-21	2.45e-19
Gh_A05G2784	337.019	1.8313	0.189281	9.67505	3.85e-22	1.42e-20
Gh_D13G0672	46.2063	1.8307	0.361203	5.06835	4.01e-07	3.15e-06
Gh_A12G1607	16.1589	1.82947	0.478522	3.82316	0.000131753	0.000648307
Gh_A03G0904	19.305	1.8293	0.471976	3.87583	0.000106261	0.000533682
Gh_Sca121931G01	134.168	1.8291	0.345983	5.28669	1.25e-07	1.06e-06
Gh_D13G1033	891.209	1.82686	0.130505	13.9984	1.59e-44	1.85e-42
Gh_D10G1677	40.1905	1.82629	0.339697	5.37624	7.61e-08	6.7e-07
Gh_D07G2097	84.5422	1.82613	0.25052	7.28935	3.11e-13	5.37e-12
Gh_D04G1920	158.871	1.82569	0.192619	9.47827	2.59e-21	9.04e-20
Gh_D11G1213	27.9869	1.82484	0.473195	3.85643	0.000115057	0.000574129
Gh_A01G0805	1687.37	1.8246	0.152852	11.9371	7.58e-33	5.38e-31
Gh_D12G0898	232.595	1.82456	0.1814	10.0582	8.45e-24	3.46e-22
Gh_A03G1200	6.08111	1.8234	0.534807	3.40945	0.000650941	0.00271511
Gh_Sca005987G03	49.8419	1.8226	0.428671	4.25174	2.12e-05	0.000123559
Gh_A06G1722	170.296	1.82258	0.310868	5.86288	4.55e-09	4.79e-08
Gh_A12G0028	19.0151	1.8223	0.457654	3.98183	6.84e-05	0.000357898
Gh_D05G1605	23683.4	1.82209	0.171606	10.6179	2.46e-26	1.21e-24
Gh_D03G0619	7.20024	1.82121	0.511493	3.56057	0.000370049	0.00163588
Gh_A03G1398	44.9501	1.8212	0.308564	5.90216	3.59e-09	3.83e-08
Gh_A13G0207	357.477	1.8209	0.190001	9.58365	9.37e-22	3.37e-20
Gh_D09G1269	176.189	1.82054	0.235357	7.73524	1.03e-14	2.09e-13
Gh_D04G0441	22.0582	1.81886	0.452477	4.01977	5.83e-05	0.000309914
Gh_D03G1219	244.056	1.81668	0.189302	9.59671	8.25e-22	2.98e-20
Gh_Sca004838G01	490.321	1.81633	0.160016	11.3509	7.34e-30	4.41e-28
Gh_A12G0196	357.361	1.81613	0.329084	5.51875	3.41e-08	3.18e-07
Gh_D06G2284	5458.84	1.81502	0.202147	8.97873	2.74e-19	8.25e-18
Gh_A07G1100	748.008	1.81477	0.156362	11.6062	3.83e-31	2.45e-29
Gh_A08G2531	470.851	1.81463	0.463356	3.91628	8.99e-05	0.000458455
Gh_A05G0670	27.4237	1.8146	0.426459	4.25504	2.09e-05	0.000121924
Gh_A06G1565	128.262	1.81345	0.285685	6.34774	2.19e-10	2.7e-09
Gh_D11G0766	2071.6	1.8132	0.240437	7.54125	4.65e-14	8.79e-13
Gh_A04G1285	38.1174	1.81244	0.341759	5.30329	1.14e-07	9.72e-07
Gh_A08G0935	81.7039	1.81149	0.277885	6.51887	7.08e-11	9.24e-10
Gh_A11G0233	8.24771	1.80991	0.533452	3.39283	0.000691748	0.00286524
Gh_D12G0539	10.463	1.80814	0.47582	3.80006	0.000144664	0.000705597
Gh_A03G0580	104.27	1.80811	0.25565	7.07259	1.52e-12	2.42e-11
Gh_D05G1630	18.4906	1.80678	0.439881	4.10744	4e-05	0.00021977
Gh_A05G2514	220.63	1.80665	0.299939	6.02339	1.71e-09	1.9e-08
Gh_A03G0905	24.1721	1.80616	0.420524	4.29503	1.75e-05	0.000103547
Gh_D07G0683	1307.25	1.80443	0.17423	10.3566	3.9e-25	1.74e-23
Gh_D02G0372	75.1981	1.80208	0.303565	5.93639	2.91e-09	3.15e-08
Gh_A12G1623	100.468	1.80151	0.266324	6.76434	1.34e-11	1.92e-10
Gh_A10G0399	117.051	1.80134	0.328786	5.47875	4.28e-08	3.93e-07
Gh_D11G0359	1727.16	1.80119	0.113951	15.8067	2.8e-56	4.87e-54
Gh_A05G3095	107.705	1.80062	0.254605	7.07221	1.52e-12	2.42e-11
Gh_D12G0924	64.6351	1.80003	0.409648	4.39409	1.11e-05	6.83e-05
Gh_D06G1846	217.674	1.79936	0.183654	9.79755	1.15e-22	4.41e-21
Gh_D06G0422	39.7264	1.79922	0.357164	5.03752	4.72e-07	3.67e-06
Gh_A03G0623	414.824	1.79867	0.191823	9.37669	6.81e-21	2.3e-19
Gh_D10G0491	123.987	1.79745	0.508669	3.53364	0.000409886	0.00179348
Gh_D12G0538	31.1365	1.79716	0.368674	4.87467	1.09e-06	7.99e-06
Gh_A10G1183	2913.15	1.79712	0.143187	12.5508	3.93e-36	3.22e-34
Gh_D07G1070	7.41367	1.79668	0.519035	3.46158	0.000537005	0.00228388
Gh_D07G1751	67.293	1.7955	0.316024	5.68153	1.33e-08	1.32e-07
Gh_D10G1305	82.1599	1.79429	0.25409	7.06162	1.65e-12	2.6e-11
Gh_A03G1486	479.829	1.79409	0.15391	11.6567	2.12e-31	1.37e-29
Gh_D13G1441	129.735	1.79395	0.250234	7.1691	7.55e-13	1.24e-11
Gh_D04G1108	652.356	1.79218	0.196618	9.115	7.87e-20	2.45e-18
Gh_D04G0608	88.7516	1.79181	0.272853	6.56695	5.14e-11	6.8e-10
Gh_A12G2468	100.159	1.78727	0.243026	7.35426	1.92e-13	3.39e-12
Gh_A06G2071	285.341	1.78719	0.21781	8.20527	2.3e-16	5.4e-15
Gh_D08G1425	222.364	1.78663	0.217648	8.20881	2.23e-16	5.25e-15
Gh_D03G0544	806.281	1.78595	0.159461	11.1999	4.08e-29	2.37e-27
Gh_D10G2220	18.9174	1.78485	0.50639	3.52465	0.00042404	0.00184902
Gh_A12G1150	481.854	1.78388	0.278367	6.40836	1.47e-10	1.85e-09
Gh_D10G0413	129.798	1.78386	0.31603	5.6446	1.66e-08	1.61e-07
Gh_A09G0304	45.8849	1.78345	0.406079	4.39188	1.12e-05	6.89e-05
Gh_D12G1227	202.53	1.78208	0.217943	8.17682	2.91e-16	6.79e-15
Gh_D02G2429	161.296	1.78162	0.270921	6.57617	4.83e-11	6.43e-10
Gh_D09G0932	86.3048	1.78154	0.248523	7.16849	7.58e-13	1.24e-11
Gh_D05G1453	1183.08	1.78118	0.18747	9.50115	2.08e-21	7.29e-20
Gh_D03G1023	22.002	1.78049	0.426052	4.17905	2.93e-05	0.000165687
Gh_A08G1216	108.73	1.77958	0.218766	8.13462	4.13e-16	9.52e-15
Gh_A08G0876	316.31	1.77957	0.210178	8.46695	2.52e-17	6.46e-16
Gh_Sca135343G01	38.8792	1.77869	0.472691	3.7629	0.000167952	0.000807345
Gh_D05G0471	14.8185	1.77768	0.483654	3.67553	0.000237357	0.00110096
Gh_D09G1562	66.3965	1.77765	0.538482	3.30122	0.000962668	0.00384656
Gh_D05G1432	59.8628	1.77758	0.314849	5.64582	1.64e-08	1.6e-07
Gh_D12G1393	1118.24	1.77663	0.244323	7.27165	3.55e-13	6.09e-12
Gh_D05G0032	68.063	1.77637	0.274589	6.46919	9.85e-11	1.26e-09
Gh_A01G1821	125.004	1.77634	0.312554	5.68332	1.32e-08	1.31e-07
Gh_A05G1456	15.7944	1.77615	0.462805	3.83779	0.000124146	0.000614331
Gh_A08G0604	66.4646	1.77555	0.313853	5.65728	1.54e-08	1.51e-07
Gh_A06G1120	31.4097	1.77393	0.375409	4.72534	2.3e-06	1.6e-05
Gh_D07G1551	26.4438	1.77388	0.459546	3.86006	0.000113357	0.0005665
Gh_D05G0171	47.8995	1.77355	0.410628	4.31913	1.57e-05	9.37e-05
Gh_D09G1564	66.7832	1.77338	0.538465	3.29339	0.000989859	0.00394334
Gh_D09G0310	20.6322	1.77321	0.434791	4.07831	4.54e-05	0.000246332
Gh_A12G0115	51.671	1.77176	0.328175	5.39882	6.71e-08	5.96e-07
Gh_A13G1904	68.7084	1.77108	0.266876	6.63632	3.22e-11	4.39e-10
Gh_D11G0606	137.34	1.77028	0.255533	6.92779	4.27e-12	6.47e-11
Gh_A02G1122	359.929	1.77026	0.290802	6.08749	1.15e-09	1.3e-08
Gh_Sca077388G01	8.84587	1.76955	0.517413	3.42	0.000626206	0.00262481
Gh_A02G0278	381.219	1.76874	0.187765	9.41997	4.51e-21	1.55e-19
Gh_A08G1443	40.7863	1.76821	0.311993	5.66747	1.45e-08	1.42e-07
Gh_D05G3812	148.803	1.7674	0.200192	8.82854	1.06e-18	3.06e-17
Gh_A07G2336	496.765	1.76673	0.138358	12.7693	2.43e-37	2.1e-35
Gh_D04G0674	1030.67	1.76658	0.164108	10.7647	5.05e-27	2.58e-25
Gh_D07G1896	86.238	1.76632	0.265016	6.66496	2.65e-11	3.65e-10
Gh_D09G1857	1291.42	1.76599	0.169342	10.4285	1.84e-25	8.41e-24
Gh_A13G1803	804.773	1.76563	0.151182	11.6789	1.63e-31	1.06e-29
Gh_D06G1376	118.157	1.76391	0.272157	6.48122	9.1e-11	1.17e-09
Gh_D08G2390	59.2339	1.76374	0.270644	6.51682	7.18e-11	9.36e-10
Gh_A09G1959	39.6234	1.76351	0.36374	4.84826	1.25e-06	9.06e-06
Gh_A01G0605	1585.53	1.76265	0.119998	14.689	7.58e-49	1e-46
Gh_D13G2550	15902.1	1.76221	0.145528	12.1091	9.46e-34	6.96e-32
Gh_A09G0861	835.108	1.76191	0.139821	12.6011	2.08e-36	1.73e-34
Gh_D07G1029	416.679	1.76183	0.188624	9.34044	9.59e-21	3.21e-19
Gh_A11G0399	45.7402	1.76179	0.365772	4.81663	1.46e-06	1.05e-05
Gh_D06G0399	464.818	1.76119	0.284212	6.19676	5.76e-10	6.8e-09
Gh_D13G1697	44.8889	1.75989	0.318012	5.53404	3.13e-08	2.94e-07
Gh_A07G0213	174.133	1.75871	0.21072	8.34621	7.05e-17	1.73e-15
Gh_D10G0696	408.572	1.75866	0.163158	10.7789	4.33e-27	2.22e-25
Gh_A13G0401	12.4187	1.75566	0.472093	3.71888	0.000200105	0.000945713
Gh_A05G0318	1083.64	1.75316	0.136878	12.8082	1.48e-37	1.29e-35
Gh_D06G0411	1986.69	1.75097	0.20981	8.34552	7.09e-17	1.74e-15
Gh_A06G1984	117.653	1.7488	0.240605	7.26837	3.64e-13	6.23e-12
Gh_A05G0605	18.3062	1.74861	0.470605	3.71567	0.000202663	0.00095636
Gh_D13G1758	23.6572	1.74803	0.419188	4.17003	3.05e-05	0.000171694
Gh_D02G1730	745.322	1.74786	0.17088	10.2285	1.48e-24	6.35e-23
Gh_D06G1805	19.5652	1.74739	0.456345	3.82909	0.000128618	0.000634666
Gh_D05G3310	244.681	1.74693	0.185285	9.42838	4.16e-21	1.44e-19
Gh_A11G1413	1696.49	1.74644	0.174317	10.0188	1.26e-23	5.09e-22
Gh_A05G1822	50.8885	1.74624	0.326974	5.3406	9.26e-08	8.04e-07
Gh_A03G0363	167.913	1.7461	0.204484	8.53909	1.35e-17	3.56e-16
Gh_A07G1193	26.8152	1.74553	0.413441	4.22196	2.42e-05	0.000139435
Gh_A04G1333	38.6021	1.74499	0.321807	5.42246	5.88e-08	5.26e-07
Gh_D10G1168	363.392	1.74414	0.197084	8.84974	8.77e-19	2.54e-17
Gh_A05G1012	210.181	1.74384	0.254176	6.86075	6.85e-12	1.01e-10
Gh_D05G0119	769.757	1.74288	0.208245	8.36941	5.79e-17	1.43e-15
Gh_A05G0974	249.784	1.74168	0.195692	8.9001	5.58e-19	1.64e-17
Gh_D13G0041	187.247	1.74166	0.226153	7.70122	1.35e-14	2.69e-13
Gh_A09G1639	36.4407	1.74148	0.344907	5.04912	4.44e-07	3.47e-06
Gh_D01G0071	9.7399	1.74041	0.519853	3.3479	0.000814276	0.0033101
Gh_D03G1080	959.377	1.73982	0.119214	14.5941	3.06e-48	3.98e-46
Gh_D11G0908	24.8164	1.73931	0.419863	4.14255	3.43e-05	0.000191519
Gh_D09G2256	215.536	1.73825	0.211964	8.20069	2.39e-16	5.61e-15
Gh_A12G2087	151.649	1.73769	0.221793	7.83473	4.7e-15	9.79e-14
Gh_A06G1508	4.8883	1.73747	0.533392	3.2574	0.00112437	0.00441274
Gh_D06G1526	142.728	1.73747	0.20147	8.62393	6.47e-18	1.75e-16
Gh_D07G0529	152.136	1.7371	0.278921	6.22795	4.73e-10	5.62e-09
Gh_D05G2997	142.987	1.73701	0.210869	8.23741	1.76e-16	4.18e-15
Gh_D02G1526	26.8792	1.73611	0.50168	3.4606	0.000538982	0.00229098
Gh_A12G1833	17.0017	1.73486	0.464441	3.73538	0.000187432	0.000891482
Gh_D06G1617	15.3809	1.73448	0.454432	3.81681	0.000135187	0.000663616
Gh_D09G1733	54.3679	1.73427	0.32425	5.34854	8.87e-08	7.72e-07
Gh_D08G0024	581.358	1.73373	0.307709	5.63432	1.76e-08	1.71e-07
Gh_A05G1454	324.218	1.73355	0.146375	11.8432	2.33e-32	1.59e-30
Gh_A06G1013	1808.04	1.73262	0.110843	15.6314	4.45e-55	7.51e-53
Gh_A01G1751	37.1068	1.73228	0.365268	4.74249	2.11e-06	1.48e-05
Gh_A04G0277	328.174	1.73217	0.163512	10.5936	3.19e-26	1.55e-24
Gh_A07G1125	58.8597	1.73119	0.32364	5.34913	8.84e-08	7.7e-07
Gh_D13G2345	280.195	1.73044	0.181483	9.535	1.5e-21	5.32e-20
Gh_A03G1604	194.348	1.72978	0.218511	7.91623	2.45e-15	5.23e-14
Gh_D05G2915	63.4397	1.72771	0.318457	5.42527	5.79e-08	5.19e-07
Gh_D05G3462	91.5337	1.72755	0.286039	6.03957	1.55e-09	1.73e-08
Gh_Sca072385G01	10.4524	1.7258	0.52085	3.31343	0.000921583	0.00369807
Gh_A09G1771	219.632	1.72509	0.302929	5.69471	1.24e-08	1.23e-07
Gh_A03G0135	299.676	1.7249	0.251415	6.86079	6.85e-12	1.01e-10
Gh_A06G1306	232.484	1.72484	0.219661	7.85231	4.08e-15	8.55e-14
Gh_A10G1659	13.2855	1.72423	0.484763	3.55686	0.000375311	0.00165496
Gh_D01G0913	422.958	1.72391	0.294799	5.84775	4.98e-09	5.21e-08
Gh_A05G2392	106.328	1.72327	0.248197	6.94316	3.83e-12	5.82e-11
Gh_A10G0569	518.512	1.72296	0.142413	12.0984	1.08e-33	7.9e-32
Gh_D07G1199	765.282	1.72288	0.149862	11.4964	1.37e-30	8.53e-29
Gh_D01G0355	22.2162	1.72258	0.403557	4.26849	1.97e-05	0.000115496
Gh_D06G1241	54.9862	1.72247	0.30701	5.61047	2.02e-08	1.94e-07
Gh_D05G1381	11.3017	1.72201	0.525306	3.27812	0.00104503	0.00413874
Gh_D05G3160	22.2804	1.72192	0.416262	4.13662	3.52e-05	0.000196055
Gh_D02G1457	90.1361	1.72165	0.286083	6.018	1.77e-09	1.96e-08
Gh_A03G0216	19.0752	1.72011	0.476658	3.6087	0.000307737	0.00138794
Gh_D12G1369	228.695	1.7201	0.219176	7.84804	4.23e-15	8.84e-14
Gh_D06G1831	323.411	1.71863	0.209907	8.18761	2.66e-16	6.23e-15
Gh_D07G2432	42.4134	1.71806	0.471383	3.64471	0.00026769	0.00122562
Gh_A12G1408	105.789	1.71744	0.326503	5.26011	1.44e-07	1.21e-06
Gh_D05G3640	31.5969	1.71743	0.38904	4.41453	1.01e-05	6.27e-05
Gh_D08G1499	191.935	1.71727	0.179949	9.54309	1.39e-21	4.93e-20
Gh_D13G0888	214.043	1.71688	0.170237	10.0853	6.42e-24	2.64e-22
Gh_A05G2149	53.0187	1.71668	0.37997	4.51793	6.24e-06	4.02e-05
Gh_D11G0545	41.9749	1.7138	0.357605	4.79245	1.65e-06	1.17e-05
Gh_D05G0952	64.2286	1.71313	0.328708	5.2117	1.87e-07	1.54e-06
Gh_D10G0497	292.248	1.71292	0.477563	3.58679	0.000334779	0.00149686
Gh_A10G1471	35.7899	1.71089	0.496521	3.44576	0.000569466	0.00240749
Gh_A05G2381	326.773	1.7093	0.235913	7.24545	4.31e-13	7.29e-12
Gh_D03G1775	134.228	1.7091	0.257313	6.64211	3.09e-11	4.24e-10
Gh_D10G1996	15378	1.70789	0.164667	10.3718	3.33e-25	1.49e-23
Gh_A01G1161	420.007	1.70774	0.176984	9.64914	4.96e-22	1.82e-20
Gh_A05G0130	148.55	1.70767	0.535813	3.18707	0.00143722	0.00547559
Gh_A02G0738	1323.42	1.70729	0.164232	10.3955	2.6e-25	1.18e-23
Gh_A11G0443	9.79211	1.70656	0.515214	3.31234	0.000925181	0.00371151
Gh_A12G1750	69.0976	1.70628	0.35247	4.84093	1.29e-06	9.37e-06
Gh_A09G1267	196.263	1.70582	0.232873	7.32512	2.39e-13	4.18e-12
Gh_A12G1860	2694.53	1.70579	0.126795	13.4531	2.95e-41	3.01e-39
Gh_A07G0873	262.48	1.70556	0.16975	10.0475	9.43e-24	3.84e-22
Gh_D11G1317	260.215	1.70533	0.177316	9.61747	6.75e-22	2.46e-20
Gh_A06G0708	1831.99	1.70473	0.122247	13.945	3.37e-44	3.87e-42
Gh_A05G3949	28949.4	1.70464	0.166319	10.2493	1.19e-24	5.17e-23
Gh_D11G1083	747.599	1.70448	0.166213	10.2548	1.13e-24	4.89e-23
Gh_D11G0658	361.267	1.70441	0.206014	8.27328	1.3e-16	3.12e-15
Gh_A05G2934	29.3003	1.70381	0.415935	4.09632	4.2e-05	0.000229341
Gh_A04G0577	59.1853	1.70321	0.346769	4.91166	9.03e-07	6.71e-06
Gh_D02G1310	28.0075	1.70299	0.402818	4.22768	2.36e-05	0.000136279
Gh_A01G1476	18.6486	1.70273	0.407444	4.17904	2.93e-05	0.000165687
Gh_D04G1463	323.959	1.7025	0.190536	8.93534	4.06e-19	1.21e-17
Gh_A04G0701	62.4036	1.70211	0.286663	5.93766	2.89e-09	3.13e-08
Gh_D04G1860	105.332	1.7019	0.287086	5.92819	3.06e-09	3.29e-08
Gh_A04G0349	794.394	1.70184	0.163777	10.3912	2.72e-25	1.23e-23
Gh_D10G2487	71.7747	1.70169	0.309635	5.4958	3.89e-08	3.59e-07
Gh_A12G1799	592.632	1.70158	0.161898	10.5102	7.76e-26	3.64e-24
Gh_D06G2071	7.814	1.70121	0.526384	3.23189	0.00122975	0.00477439
Gh_A05G3404	816.107	1.70064	0.20573	8.26638	1.38e-16	3.31e-15
Gh_A07G1055	41.4508	1.69997	0.469417	3.62145	0.000292959	0.00132763
Gh_D03G1540	50.4925	1.69947	0.336952	5.04366	4.57e-07	3.56e-06
Gh_A11G0206	6.22284	1.69944	0.528671	3.21456	0.00130644	0.00503729
Gh_A01G2150	129.045	1.69865	0.205873	8.25097	1.57e-16	3.75e-15
Gh_D10G2429	10.3664	1.69824	0.504633	3.36529	0.000764623	0.00312426
Gh_D11G2821	31.5385	1.69782	0.466485	3.63959	0.000273068	0.00124746
Gh_D10G0878	90.3385	1.69687	0.356015	4.7663	1.88e-06	1.32e-05
Gh_D04G1044	136.74	1.69628	0.301901	5.61869	1.92e-08	1.86e-07
Gh_D11G3261	95.976	1.69537	0.2948	5.75091	8.88e-09	8.98e-08
Gh_A05G3070	1445.29	1.69364	0.156568	10.8173	2.85e-27	1.47e-25
Gh_D02G1759	16.7938	1.69345	0.454302	3.72758	0.000193324	0.000915824
Gh_D04G1454	20.9024	1.69316	0.447148	3.78659	0.000152731	0.000740397
Gh_D06G0992	106.276	1.6929	0.276655	6.11917	9.41e-10	1.08e-08
Gh_D12G2337	275.572	1.69276	0.202721	8.35023	6.81e-17	1.68e-15
Gh_D02G1891	4010.14	1.6918	0.2979	5.67911	1.35e-08	1.34e-07
Gh_A03G0377	283.675	1.69064	0.187953	8.99503	2.36e-19	7.14e-18
Gh_D05G2447	319.513	1.68983	0.165725	10.1965	2.05e-24	8.77e-23
Gh_A11G1384	45.0858	1.68935	0.314332	5.3744	7.68e-08	6.76e-07
Gh_A06G1077	22.5653	1.68886	0.412045	4.09871	4.15e-05	0.000227277
Gh_D02G0762	23.0276	1.68862	0.438499	3.8509	0.000117683	0.000585756
Gh_D13G1249	16.3527	1.68855	0.470927	3.58559	0.00033632	0.00150285
Gh_A05G0062	572.131	1.68744	0.259291	6.50791	7.62e-11	9.9e-10
Gh_D02G2305	145.132	1.68737	0.342053	4.93306	8.09e-07	6.07e-06
Gh_D06G2379	256.228	1.68625	0.238789	7.06168	1.65e-12	2.6e-11
Gh_D13G1193	29.37	1.68567	0.419787	4.01553	5.93e-05	0.000314916
Gh_D08G0291	94.4174	1.68508	0.299155	5.6328	1.77e-08	1.72e-07
Gh_D10G0829	400.894	1.68439	0.1741	9.67486	3.86e-22	1.42e-20
Gh_A02G0212	216.181	1.68369	0.222152	7.57901	3.48e-14	6.69e-13
Gh_D07G1450	180.755	1.68336	0.243759	6.90586	4.99e-12	7.49e-11
Gh_D01G0817	207.254	1.68235	0.213273	7.88824	3.06e-15	6.48e-14
Gh_A03G1677	61.9743	1.68198	0.309192	5.43993	5.33e-08	4.81e-07
Gh_D10G0981	372.118	1.68192	0.472702	3.55811	0.000373538	0.00164825
Gh_A09G2098	35.6308	1.68186	0.326652	5.14877	2.62e-07	2.11e-06
Gh_D13G1081	57.7152	1.68161	0.320197	5.25181	1.51e-07	1.26e-06
Gh_D13G0336	127.726	1.68139	0.217029	7.74731	9.39e-15	1.9e-13
Gh_D12G2572	42.7836	1.68108	0.339752	4.94797	7.5e-07	5.64e-06
Gh_D02G2303	229.339	1.68103	0.22725	7.39724	1.39e-13	2.5e-12
Gh_A01G0791	219.764	1.67917	0.216108	7.77003	7.85e-15	1.61e-13
Gh_D02G0323	13.2822	1.67868	0.504927	3.3246	0.00088546	0.00356803
Gh_A01G1825	117.974	1.67852	0.252573	6.6457	3.02e-11	4.14e-10
Gh_D05G0341	301.242	1.67843	0.29669	5.65719	1.54e-08	1.51e-07
Gh_D09G0096	17.7246	1.67838	0.445004	3.77161	0.000162195	0.000782009
Gh_A01G0628	42.0716	1.67823	0.402685	4.16761	3.08e-05	0.000173309
Gh_A12G1243	270.59	1.67668	0.191199	8.7693	1.8e-18	5.08e-17
Gh_A05G0698	100.945	1.6762	0.272783	6.14483	8.01e-10	9.27e-09
Gh_D05G3602	253.828	1.6762	0.160153	10.4663	1.23e-25	5.7e-24
Gh_D05G0699	19.3916	1.67551	0.537874	3.11505	0.00183911	0.00680549
Gh_A05G0793	16.5912	1.67434	0.457452	3.66013	0.000252083	0.00116167
Gh_D05G1129	94.4894	1.67412	0.316609	5.28764	1.24e-07	1.05e-06
Gh_D09G0721	24.836	1.67394	0.376838	4.44206	8.91e-06	5.58e-05
Gh_D10G0699	47.2043	1.67374	0.465292	3.59718	0.000321686	0.00144429
Gh_D11G0364	12.4663	1.67294	0.467831	3.57596	0.000348947	0.00155205
Gh_D08G2185	136.522	1.67266	0.219732	7.61227	2.69e-14	5.22e-13
Gh_D08G2421	557.163	1.6725	0.140598	11.8956	1.25e-32	8.69e-31
Gh_D06G1634	372.511	1.67218	0.194491	8.59773	8.13e-18	2.18e-16
Gh_D04G1022	51.2367	1.67186	0.325266	5.13997	2.75e-07	2.21e-06
Gh_D04G1796	114.028	1.67168	0.242278	6.89987	5.21e-12	7.78e-11
Gh_D12G1241	80.7575	1.67157	0.307416	5.43748	5.4e-08	4.87e-07
Gh_D10G0044	1449.68	1.67155	0.198272	8.43057	3.44e-17	8.7e-16
Gh_A08G2340	163.323	1.67084	0.284863	5.86543	4.48e-09	4.72e-08
Gh_A05G1011	19.7401	1.66973	0.417816	3.99631	6.43e-05	0.000338724
Gh_D07G2418	241.934	1.66885	0.188828	8.83794	9.75e-19	2.82e-17
Gh_D13G0215	107.299	1.66838	0.40141	4.15629	3.23e-05	0.000181194
Gh_D13G1680	49.6072	1.66606	0.318908	5.22427	1.75e-07	1.45e-06
Gh_A02G0589	449.274	1.6658	0.251944	6.6118	3.8e-11	5.13e-10
Gh_D04G1732	193.399	1.66485	0.198778	8.37541	5.5e-17	1.36e-15
Gh_A10G0468	37.6763	1.66434	0.499186	3.33411	0.000855741	0.00345694
Gh_D09G0212	18.9632	1.66414	0.463761	3.58836	0.000332771	0.00148899
Gh_A03G1341	84.8688	1.66277	0.453082	3.6699	0.000242645	0.00112278
Gh_A10G0449	171.019	1.66229	0.397636	4.18044	2.91e-05	0.000164765
Gh_D11G1351	192.108	1.6616	0.225518	7.36792	1.73e-13	3.08e-12
Gh_D01G1078	307.882	1.66095	0.167952	9.88942	4.63e-23	1.81e-21
Gh_D10G2311	98.1362	1.66087	0.271914	6.10808	1.01e-09	1.15e-08
Gh_A12G0040	831.963	1.6606	0.197138	8.42353	3.65e-17	9.21e-16
Gh_A07G0229	8.80076	1.65965	0.503915	3.29351	0.000989443	0.00394194
Gh_A10G2255	29.4827	1.65918	0.4087	4.05966	4.91e-05	0.000265138
Gh_D01G0303	424.341	1.65763	0.163357	10.1473	3.41e-24	1.43e-22
Gh_D07G1876	26.6231	1.65745	0.445944	3.71673	0.00020182	0.000952759
Gh_A12G0958	69.2463	1.65616	0.29345	5.64376	1.66e-08	1.62e-07
Gh_D02G0587	21.2957	1.65615	0.460599	3.59565	0.000323588	0.00145217
Gh_A10G0473	114.496	1.65585	0.500443	3.30876	0.000937098	0.00375325
Gh_A12G1026	22.9894	1.65559	0.414943	3.98993	6.61e-05	0.000346838
Gh_D11G0807	265.006	1.65542	0.207328	7.98456	1.41e-15	3.08e-14
Gh_A11G3176	605.224	1.65539	0.172194	9.61352	7.01e-22	2.55e-20
Gh_A10G1047	115.42	1.65224	0.209378	7.89119	2.99e-15	6.33e-14
Gh_D12G0534	4.29898	1.65114	0.530751	3.11096	0.0018648	0.00688599
Gh_D03G0110	28.6531	1.64971	0.391811	4.21048	2.55e-05	0.000145839
Gh_D11G3441	22.2141	1.64773	0.452003	3.64541	0.000266969	0.00122288
Gh_D12G0233	263.043	1.64709	0.194568	8.46535	2.55e-17	6.54e-16
Gh_D09G0090	10.3494	1.64608	0.491429	3.34957	0.000809378	0.00329154
Gh_Sca050655G01	37.5465	1.64512	0.398581	4.12745	3.67e-05	0.000203296
Gh_D08G2562	139.464	1.6446	0.286764	5.735	9.75e-09	9.8e-08
Gh_A01G0894	206.908	1.64389	0.162811	10.0969	5.7e-24	2.36e-22
Gh_A05G0355	132.999	1.64361	0.232197	7.07853	1.46e-12	2.32e-11
Gh_D11G0660	30.842	1.64321	0.391684	4.19524	2.73e-05	0.000155122
Gh_D12G2031	2261.46	1.64297	0.144713	11.3533	7.14e-30	4.3e-28
Gh_D08G0048	528.475	1.64247	0.408957	4.01624	5.91e-05	0.000314107
Gh_A08G0525	1976.11	1.64184	0.114555	14.3323	1.37e-46	1.71e-44
Gh_D01G0342	445.129	1.64112	0.204377	8.02989	9.76e-16	2.16e-14
Gh_A13G1975	8.39612	1.64087	0.514271	3.19067	0.00141943	0.00541649
Gh_A01G0877	762.428	1.63973	0.276683	5.92637	3.1e-09	3.33e-08
Gh_A05G0440	55.375	1.63892	0.316632	5.1761	2.27e-07	1.85e-06
Gh_A05G2132	83.2477	1.6371	0.270074	6.0617	1.35e-09	1.52e-08
Gh_A07G2348	2466.03	1.63627	0.21968	7.44844	9.44e-14	1.72e-12
Gh_A06G0162	120.38	1.63605	0.274523	5.95963	2.53e-09	2.75e-08
Gh_D01G0493	53.4225	1.63581	0.328714	4.97639	6.48e-07	4.92e-06
Gh_D01G0200	580.704	1.63466	0.175158	9.33244	1.03e-20	3.45e-19
Gh_A13G1287	37.246	1.63387	0.34198	4.77767	1.77e-06	1.26e-05
Gh_A05G0179	111.532	1.63228	0.459417	3.55294	0.000380956	0.00167687
Gh_A08G1463	81.0153	1.63122	0.253805	6.42706	1.3e-10	1.65e-09
Gh_A10G1366	98.5588	1.63059	0.22317	7.30653	2.74e-13	4.75e-12
Gh_D05G0192	444.257	1.62841	0.520367	3.12934	0.00175198	0.0065181
Gh_A05G3640	17.4644	1.62684	0.445544	3.65136	0.000260854	0.00119782
Gh_A05G2882	64.0656	1.6265	0.309493	5.25536	1.48e-07	1.24e-06
Gh_A05G2673	51.5904	1.625	0.355065	4.57663	4.73e-06	3.11e-05
Gh_A11G3238	1489.6	1.62497	0.129863	12.5129	6.34e-36	5.16e-34
Gh_D08G2749	7.74154	1.62434	0.532632	3.04964	0.00229117	0.00825005
Gh_A13G2289	83.5893	1.62404	0.297902	5.4516	4.99e-08	4.53e-07
Gh_A06G0496	228.342	1.62295	0.435949	3.7228	0.000197023	0.000932183
Gh_A06G1759	9.87631	1.62272	0.485825	3.34012	0.000837419	0.00339213
Gh_A09G0156	99.8012	1.62161	0.253878	6.38737	1.69e-10	2.11e-09
Gh_Sca072123G01	7.89033	1.62159	0.510408	3.17705	0.00148783	0.00565031
Gh_A09G1544	209.136	1.62113	0.191805	8.45199	2.86e-17	7.31e-16
Gh_A05G0684	144.52	1.62109	0.478086	3.39079	0.000696916	0.00288423
Gh_D07G2355	32.2387	1.62094	0.364721	4.44433	8.82e-06	5.52e-05
Gh_A05G2493	84.4546	1.6209	0.333701	4.85734	1.19e-06	8.68e-06
Gh_D11G1562	1367.74	1.61995	0.168894	9.59152	8.68e-22	3.13e-20
Gh_D07G0332	80.0821	1.61953	0.300805	5.38399	7.29e-08	6.44e-07
Gh_A06G0016	69.5145	1.61947	0.256932	6.30308	2.92e-10	3.55e-09
Gh_A02G1019	121.125	1.61884	0.205152	7.89094	3e-15	6.34e-14
Gh_A05G1027	25.4099	1.61784	0.40986	3.9473	7.9e-05	0.000407181
Gh_A05G0114	145.99	1.61723	0.205086	7.88562	3.13e-15	6.61e-14
Gh_A10G1532	196.367	1.61633	0.196076	8.24337	1.67e-16	3.99e-15
Gh_D09G0337	167.996	1.61614	0.241617	6.68883	2.25e-11	3.13e-10
Gh_D04G0726	26.7839	1.61605	0.374553	4.31461	1.6e-05	9.55e-05
Gh_D05G0682	45.4103	1.61583	0.323595	4.99336	5.93e-07	4.55e-06
Gh_D11G2183	29.8624	1.61429	0.513293	3.14496	0.00166107	0.00622602
Gh_A05G3814	617.062	1.61376	0.202644	7.96353	1.67e-15	3.62e-14
Gh_A11G3038	5.64199	1.61287	0.535958	3.00932	0.00261837	0.0092701
Gh_Sca057551G01	21.3213	1.61279	0.475083	3.39476	0.000686885	0.00284787
Gh_A07G0472	1574.36	1.61244	0.160386	10.0535	8.87e-24	3.62e-22
Gh_A07G1711	80.2028	1.61216	0.306359	5.2623	1.42e-07	1.2e-06
Gh_D02G0056	347.841	1.60949	0.192884	8.34436	7.16e-17	1.76e-15
Gh_D10G0208	12.0366	1.60945	0.506056	3.18038	0.00147084	0.00559151
Gh_A10G2198	100.699	1.60941	0.27438	5.86563	4.47e-09	4.72e-08
Gh_A12G1482	759.732	1.6087	0.116159	13.8491	1.29e-43	1.46e-41
Gh_D13G2173	110.618	1.60754	0.371109	4.33172	1.48e-05	8.9e-05
Gh_D08G1766	119.626	1.60618	0.243614	6.59311	4.31e-11	5.78e-10
Gh_A09G0433	602.759	1.60601	0.167766	9.57297	1.04e-21	3.73e-20
Gh_D12G1767	29.0231	1.60574	0.387177	4.14732	3.36e-05	0.000187824
Gh_A02G1790	3.42879	1.60535	0.524642	3.05991	0.00221407	0.00800682
Gh_D05G3253	21.5096	1.60465	0.474874	3.3791	0.000727243	0.0029933
Gh_A12G1537	204.25	1.6044	0.209261	7.66698	1.76e-14	3.47e-13
Gh_A07G0384	149.995	1.60418	0.267347	6.00038	1.97e-09	2.17e-08
Gh_D11G1233	6.76394	1.60382	0.531837	3.01562	0.00256453	0.00910548
Gh_D08G1328	85.8875	1.6038	0.319964	5.01242	5.37e-07	4.15e-06
Gh_A01G1605	2233.45	1.60354	0.260581	6.15371	7.57e-10	8.8e-09
Gh_D02G1171	70.2366	1.60311	0.280622	5.71271	1.11e-08	1.11e-07
Gh_A03G1864	231.937	1.60148	0.196074	8.16773	3.14e-16	7.3e-15
Gh_D11G1509	59.9466	1.60116	0.307305	5.21032	1.89e-07	1.55e-06
Gh_D05G0035	182.548	1.60033	0.242489	6.59959	4.12e-11	5.55e-10
Gh_A08G2515	2147.06	1.60007	0.157127	10.1833	2.35e-24	1e-22
Gh_A11G1698	212.239	1.59967	0.224834	7.11488	1.12e-12	1.81e-11
Gh_D06G0181	1026.37	1.59956	0.110771	14.4402	2.89e-47	3.64e-45
Gh_D07G2175	24.9438	1.59897	0.466673	3.42632	0.000611814	0.00256828
Gh_Sca004857G04	631.922	1.59885	0.194353	8.22649	1.93e-16	4.56e-15
Gh_D11G2798	8.61615	1.5985	0.47449	3.36887	0.000754759	0.0030918
Gh_A12G1925	607.727	1.5985	0.277251	5.76551	8.14e-09	8.28e-08
Gh_D05G3386	117.714	1.59765	0.245076	6.51899	7.08e-11	9.23e-10
Gh_D08G0677	273.351	1.59765	0.189661	8.42367	3.65e-17	9.2e-16
Gh_D08G0997	27.5228	1.59758	0.376903	4.2387	2.25e-05	0.000130315
Gh_D12G0336	88.1706	1.59742	0.28868	5.53353	3.14e-08	2.94e-07
Gh_D08G2247	70.85	1.59676	0.31162	5.12406	2.99e-07	2.39e-06
Gh_A11G2012	32.1051	1.59663	0.508107	3.14231	0.00167618	0.00627317
Gh_A04G0588	246.62	1.59654	0.157159	10.1588	3.03e-24	1.28e-22
Gh_A07G1802	353.668	1.59574	0.24911	6.40578	1.5e-10	1.88e-09
Gh_A12G2327	172.566	1.5956	0.190704	8.36686	5.92e-17	1.46e-15
Gh_D11G1335	60.0638	1.59477	0.492627	3.23727	0.0012068	0.00469445
Gh_D05G1283	768.744	1.59436	0.243964	6.53522	6.35e-11	8.33e-10
Gh_D02G2233	159.978	1.59434	0.202253	7.8829	3.2e-15	6.75e-14
Gh_D09G0591	16.0306	1.59427	0.449351	3.54794	0.000388259	0.00170574
Gh_D09G0470	159.043	1.59414	0.296319	5.3798	7.46e-08	6.58e-07
Gh_D04G0596	84.4102	1.59402	0.237037	6.72475	1.76e-11	2.48e-10
Gh_A02G1082	126.965	1.59401	0.230983	6.90097	5.16e-12	7.73e-11
Gh_A02G1000	3125.78	1.59388	0.310317	5.1363	2.8e-07	2.25e-06
Gh_A11G2213	50.8152	1.59271	0.293969	5.41797	6.03e-08	5.39e-07
Gh_D02G1052	5.07387	1.59166	0.534823	2.97605	0.0029199	0.0101981
Gh_D04G0573	1279.48	1.59112	0.165547	9.61128	7.16e-22	2.6e-20
Gh_A07G2354	3673.8	1.59074	0.177163	8.97897	2.73e-19	8.23e-18
Gh_A13G2116	62.4585	1.59064	0.288191	5.51941	3.4e-08	3.17e-07
Gh_D13G1068	170.699	1.59049	0.292883	5.43045	5.62e-08	5.05e-07
Gh_D05G2280	294.589	1.59007	0.406262	3.91391	9.08e-05	0.000462537
Gh_D12G0461	327.567	1.58969	0.178714	8.89519	5.83e-19	1.71e-17
Gh_D06G1311	369.841	1.58948	0.18888	8.41533	3.92e-17	9.84e-16
Gh_D02G2396	38.4389	1.58929	0.353573	4.49495	6.96e-06	4.44e-05
Gh_D03G0057	225.046	1.58885	0.23253	6.83286	8.32e-12	1.22e-10
Gh_D08G1220	86.5621	1.58822	0.298774	5.31578	1.06e-07	9.13e-07
Gh_D01G1101	14.3752	1.588	0.497244	3.1936	0.00140512	0.00536601
Gh_D04G1863	184.632	1.58705	0.228913	6.93298	4.12e-12	6.25e-11
Gh_A11G2587	455.326	1.5865	0.362153	4.38073	1.18e-05	7.23e-05
Gh_A05G3780	24.4478	1.58592	0.467373	3.39326	0.000690667	0.00286096
Gh_A09G1939	37.4147	1.58501	0.335053	4.73061	2.24e-06	1.56e-05
Gh_A08G1171	146.177	1.58445	0.225257	7.03399	2.01e-12	3.14e-11
Gh_A03G0817	238.168	1.58339	0.196743	8.04802	8.41e-16	1.88e-14
Gh_D11G1586	400.868	1.58197	0.221651	7.1372	9.53e-13	1.55e-11
Gh_A13G2200	786.673	1.58135	0.132179	11.9638	5.5e-33	3.93e-31
Gh_D07G1779	166.391	1.58072	0.23895	6.61526	3.71e-11	5.01e-10
Gh_A08G2092	556.729	1.58056	0.168806	9.36315	7.74e-21	2.61e-19
Gh_D10G2315	39.8617	1.58032	0.303036	5.21495	1.84e-07	1.52e-06
Gh_A12G1118	4.01516	1.58026	0.532053	2.97012	0.00297682	0.010375
Gh_D03G0008	80.3425	1.58001	0.370713	4.26208	2.03e-05	0.000118485
Gh_D06G2116	5328.1	1.57957	0.13247	11.924	8.88e-33	6.22e-31
Gh_A12G2233	11.6571	1.57956	0.507602	3.11182	0.00185939	0.00686816
Gh_A04G0509	221.253	1.57859	0.195854	8.06002	7.63e-16	1.72e-14
Gh_D13G2254	587.56	1.57823	0.496139	3.18103	0.00146755	0.0055804
Gh_A06G1004	14.4277	1.57795	0.524322	3.00951	0.0026167	0.00926586
Gh_D03G1714	57.97	1.5777	0.308843	5.10842	3.25e-07	2.59e-06
Gh_A05G1247	31.7266	1.57734	0.368725	4.27781	1.89e-05	0.000111154
Gh_A08G1825	167.572	1.57731	0.235337	6.70233	2.05e-11	2.87e-10
Gh_Sca004871G02	798.84	1.5771	0.148688	10.6068	2.77e-26	1.35e-24
Gh_D07G2007	645.729	1.57699	0.255813	6.16463	7.06e-10	8.25e-09
Gh_D11G1098	135.154	1.57533	0.228124	6.90559	5e-12	7.5e-11
Gh_Sca017508G01	150.724	1.57533	0.215275	7.31775	2.52e-13	4.4e-12
Gh_A01G0486	1129.28	1.57503	0.347882	4.52748	5.97e-06	3.86e-05
Gh_A12G2435	295.031	1.57399	0.188564	8.34721	6.99e-17	1.72e-15
Gh_A11G2469	1445.34	1.5734	0.185248	8.49346	2.01e-17	5.19e-16
Gh_D05G3204	27.1695	1.57283	0.391575	4.01668	5.9e-05	0.000313643
Gh_A10G1496	108.952	1.57277	0.271759	5.78738	7.15e-09	7.33e-08
Gh_A05G1848	159.904	1.57267	0.369634	4.25468	2.09e-05	0.00012209
Gh_D11G3443	17.4981	1.57179	0.489458	3.2113	0.00132137	0.00508566
Gh_D11G1687	10.0585	1.57064	0.498702	3.14947	0.0016357	0.00614367
Gh_D13G0281	283.796	1.56987	0.354793	4.42475	9.66e-06	6e-05
Gh_A07G0470	22.9064	1.56887	0.41924	3.74218	0.000182429	0.000869144
Gh_D05G0429	3202.09	1.56873	0.194152	8.07991	6.48e-16	1.47e-14
Gh_D10G1472	157.71	1.56844	0.185406	8.4595	2.69e-17	6.87e-16
Gh_D11G1667	330.463	1.56807	0.188647	8.31216	9.4e-17	2.28e-15
Gh_A10G1407	30.7592	1.56766	0.437982	3.57928	0.000344539	0.00153554
Gh_A13G0201	147.57	1.56762	0.343974	4.5574	5.18e-06	3.38e-05
Gh_D12G0182	83.433	1.567	0.313277	5.00198	5.67e-07	4.36e-06
Gh_D06G1599	366.068	1.56679	0.184098	8.51065	1.73e-17	4.51e-16
Gh_A09G2205	190.513	1.56664	0.266965	5.86835	4.4e-09	4.65e-08
Gh_D09G2348	20.913	1.56644	0.391943	3.9966	6.43e-05	0.000338408
Gh_A06G1572	98.7305	1.56638	0.235676	6.64632	3.01e-11	4.12e-10
Gh_A09G1169	184.463	1.56628	0.197708	7.92217	2.33e-15	5e-14
Gh_D12G2069	25.5712	1.56622	0.480756	3.25782	0.00112273	0.00440778
Gh_D01G0323	8.03864	1.56591	0.504713	3.10258	0.0019184	0.00705984
Gh_D05G1628	138.032	1.56546	0.263494	5.94118	2.83e-09	3.06e-08
Gh_A07G1821	62.3195	1.56482	0.447857	3.49402	0.00047581	0.00205088
Gh_A02G0883	166.847	1.56469	0.198515	7.88198	3.22e-15	6.79e-14
Gh_D10G0713	57.7243	1.56422	0.321928	4.8589	1.18e-06	8.61e-06
Gh_A09G1434	1482.34	1.56348	0.122081	12.8069	1.5e-37	1.31e-35
Gh_A10G1430	9.70754	1.56328	0.537348	2.90925	0.00362292	0.0123259
Gh_A09G1344	275.552	1.56311	0.216041	7.23523	4.65e-13	7.83e-12
Gh_D11G0368	183.702	1.56297	0.202792	7.70729	1.29e-14	2.57e-13
Gh_D10G2458	53.7149	1.56183	0.33641	4.64265	3.44e-06	2.32e-05
Gh_A01G1874	16.2086	1.56166	0.450868	3.46368	0.000532846	0.00226814
Gh_D12G2198	95.5876	1.56157	0.277375	5.62979	1.8e-08	1.75e-07
Gh_A06G1048	13.1112	1.56104	0.48422	3.22383	0.0012649	0.00489586
Gh_D05G2755	927.54	1.56068	0.158377	9.8542	6.57e-23	2.55e-21
Gh_D05G1797	10.4103	1.56063	0.513195	3.041	0.00235796	0.00845886
Gh_D08G1967	219.392	1.56045	0.264442	5.90092	3.61e-09	3.86e-08
Gh_D06G0290	82.2916	1.5595	0.290902	5.36091	8.28e-08	7.24e-07
Gh_D02G0089	157.578	1.559	0.189374	8.23236	1.84e-16	4.35e-15
Gh_D09G1274	495.202	1.55895	0.163888	9.5123	1.86e-21	6.57e-20
Gh_A05G0850	1753.56	1.55816	0.1051	14.8255	1e-49	1.36e-47
Gh_A10G0779	418.202	1.55791	0.488202	3.19112	0.00141723	0.00541017
Gh_D02G0456	4094.14	1.55601	0.104493	14.8911	3.77e-50	5.25e-48
Gh_D07G1862	22.4593	1.55558	0.492285	3.15991	0.00157818	0.00595317
Gh_D04G1166	114.386	1.55552	0.234004	6.6474	2.98e-11	4.1e-10
Gh_A03G0267	847.802	1.55518	0.323378	4.80917	1.52e-06	1.09e-05
Gh_D01G0029	30.2004	1.55467	0.368581	4.21799	2.46e-05	0.000141653
Gh_A07G1085	769.666	1.55327	0.134564	11.543	8.01e-31	5.04e-29
Gh_A07G0053	6.38037	1.5527	0.533902	2.90821	0.003635	0.0123621
Gh_D08G1664	35.7511	1.55259	0.340973	4.55341	5.28e-06	3.44e-05
Gh_D02G0708	61.7729	1.55222	0.269469	5.76029	8.4e-09	8.52e-08
Gh_D10G2422	3995.39	1.55191	0.137014	11.3267	9.68e-30	5.79e-28
Gh_Sca128196G01	4.93864	1.55175	0.535904	2.89558	0.00378454	0.0128012
Gh_A08G1914	186.859	1.5515	0.200233	7.7485	9.3e-15	1.89e-13
Gh_A07G2181	58.4081	1.55089	0.298871	5.18915	2.11e-07	1.73e-06
Gh_A11G0887	42.2103	1.55088	0.416368	3.72477	0.000195491	0.000925303
Gh_A06G1479	183.541	1.54949	0.184027	8.41993	3.77e-17	9.48e-16
Gh_A02G0890	32.7752	1.54912	0.37905	4.08685	4.37e-05	0.000237937
Gh_D06G1340	30.0428	1.5488	0.409209	3.78487	0.000153789	0.00074516
Gh_D09G1175	120.262	1.54878	0.269134	5.75467	8.68e-09	8.8e-08
Gh_Sca033040G01	35.6643	1.54799	0.5246	2.95079	0.00316959	0.0109641
Gh_D06G0935	1421.73	1.54785	0.132048	11.7219	9.85e-32	6.47e-30
Gh_D13G1403	549.584	1.54757	0.454933	3.40177	0.000669517	0.00278342
Gh_D02G0521	106.241	1.54752	0.236305	6.54883	5.8e-11	7.64e-10
Gh_A06G1087	259.864	1.54738	0.215722	7.17303	7.34e-13	1.21e-11
Gh_D05G0755	866.413	1.54702	0.208455	7.42138	1.16e-13	2.1e-12
Gh_A07G2365	6.45171	1.54701	0.505115	3.06269	0.00219354	0.00793984
Gh_A08G2542	2388.55	1.54598	0.398856	3.87603	0.000106173	0.000533415
Gh_A10G1464	27.18	1.54553	0.496244	3.11446	0.00184283	0.00681673
Gh_D06G2174	159.309	1.54527	0.28597	5.40359	6.53e-08	5.82e-07
Gh_D08G2213	351.854	1.54498	0.494704	3.12304	0.00178994	0.00663963
Gh_A01G0157	238.446	1.54419	0.180003	8.5787	9.6e-18	2.56e-16
Gh_A11G2171	881.255	1.54374	0.1284	12.0229	2.69e-33	1.94e-31
Gh_A05G2369	1007.96	1.54197	0.121996	12.6396	1.28e-36	1.07e-34
Gh_D02G0252	203.546	1.54185	0.284084	5.42743	5.72e-08	5.13e-07
Gh_A07G1203	17.6365	1.54157	0.44135	3.49285	0.000477894	0.00205881
Gh_D04G1483	36.041	1.54133	0.393009	3.92188	8.79e-05	0.000448914
Gh_D05G0836	109.406	1.54107	0.243422	6.33084	2.44e-10	3e-09
Gh_A04G1185	69.4655	1.54093	0.253836	6.07059	1.27e-09	1.44e-08
Gh_D05G1083	255.447	1.54082	0.194164	7.93566	2.09e-15	4.5e-14
Gh_A11G1224	45.4226	1.5407	0.313686	4.9116	9.03e-07	6.71e-06
Gh_D08G2257	133.108	1.53954	0.349252	4.40813	1.04e-05	6.44e-05
Gh_A01G1023	322.147	1.53886	0.179837	8.55698	1.16e-17	3.07e-16
Gh_A01G1664	980.691	1.53877	0.122495	12.5619	3.42e-36	2.82e-34
Gh_D05G2124	24.2536	1.53865	0.370736	4.15025	3.32e-05	0.000185609
Gh_A02G0424	7.74897	1.53833	0.534292	2.87919	0.003987	0.013384
Gh_A06G0238	104.976	1.53778	0.302985	5.07543	3.87e-07	3.04e-06
Gh_A10G0359	72.4423	1.53769	0.360908	4.26062	2.04e-05	0.000119181
Gh_A08G1853	116.341	1.53751	0.236566	6.4993	8.07e-11	1.05e-09
Gh_D05G2879	9.31564	1.5371	0.506734	3.03335	0.00241858	0.00864452
Gh_D09G1607	547.907	1.53666	0.151726	10.1279	4.16e-24	1.74e-22
Gh_D11G0334	275.135	1.53626	0.219019	7.0143	2.31e-12	3.6e-11
Gh_D02G1804	521.084	1.53561	0.192801	7.96476	1.66e-15	3.59e-14
Gh_A05G0775	88.4598	1.53522	0.266392	5.76301	8.26e-09	8.39e-08
Gh_A03G1290	897.563	1.53499	0.149839	10.2442	1.26e-24	5.43e-23
Gh_A11G2560	667.956	1.53497	0.149853	10.2431	1.27e-24	5.49e-23
Gh_A09G0273	322.862	1.53464	0.163485	9.38705	6.17e-21	2.1e-19
Gh_D05G2044	138.654	1.53436	0.331965	4.62204	3.8e-06	2.55e-05
Gh_D09G0743	53.0653	1.53408	0.536944	2.85707	0.00427572	0.0142106
Gh_D05G0076	589.128	1.5339	0.172455	8.89449	5.87e-19	1.72e-17
Gh_D08G2197	215.995	1.53259	0.216823	7.06839	1.57e-12	2.49e-11
Gh_A09G1856	186.226	1.53256	0.219198	6.99166	2.72e-12	4.19e-11
Gh_D03G1024	10.31	1.53249	0.496594	3.08601	0.00202863	0.00741599
Gh_A10G1763	195.975	1.53241	0.229526	6.67641	2.45e-11	3.4e-10
Gh_A04G0129	63.4623	1.53156	0.359611	4.25894	2.05e-05	0.000120021
Gh_D12G2105	1128.12	1.53131	0.205205	7.46232	8.5e-14	1.56e-12
Gh_A12G1355	1253.82	1.53128	0.143712	10.6552	1.65e-26	8.16e-25
Gh_A13G0332	12.9271	1.53108	0.465559	3.2887	0.0010065	0.00400212
Gh_A13G1271	48.0948	1.53031	0.300093	5.09944	3.41e-07	2.71e-06
Gh_A11G1569	277.554	1.52988	0.251604	6.08051	1.2e-09	1.36e-08
Gh_A11G2732	201.504	1.52954	0.153253	9.9805	1.86e-23	7.4e-22
Gh_A09G1137	128.835	1.52953	0.227708	6.71707	1.85e-11	2.61e-10
Gh_D09G0853	829.289	1.52948	0.495148	3.08894	0.00200871	0.00735264
Gh_D05G3086	531.165	1.52938	0.138141	11.0712	1.73e-28	9.77e-27
Gh_D09G0787	58.8689	1.5291	0.33212	4.60405	4.14e-06	2.76e-05
Gh_D02G1237	179.432	1.52796	0.206574	7.39665	1.4e-13	2.51e-12
Gh_A11G3103	27.2572	1.52783	0.410879	3.71844	0.000200455	0.000946921
Gh_A08G1483	46.3143	1.52756	0.334658	4.56455	5.01e-06	3.28e-05
Gh_D04G0994	92.6928	1.52733	0.304557	5.01492	5.31e-07	4.1e-06
Gh_D07G0979	45.1001	1.52728	0.302496	5.04891	4.44e-07	3.47e-06
Gh_D12G2214	238.177	1.52681	0.164846	9.26206	2.01e-20	6.52e-19
Gh_A11G1010	171.681	1.52635	0.246076	6.20276	5.55e-10	6.56e-09
Gh_D05G2456	704.538	1.52624	0.143899	10.6064	2.78e-26	1.36e-24
Gh_A13G1695	236.712	1.52608	0.189704	8.0445	8.66e-16	1.93e-14
Gh_D11G3288	2407.25	1.52577	0.133081	11.465	1.98e-30	1.22e-28
Gh_A04G0589	111.756	1.52458	0.306756	4.97001	6.7e-07	5.08e-06
Gh_D04G1043	425.658	1.52412	0.14162	10.762	5.2e-27	2.65e-25
Gh_D07G1351	64.2077	1.52343	0.275932	5.52104	3.37e-08	3.14e-07
Gh_A10G0405	299.649	1.52321	0.344699	4.41896	9.92e-06	6.16e-05
Gh_A05G1985	162.482	1.52317	0.223971	6.80075	1.04e-11	1.51e-10
Gh_D09G0203	1021.07	1.52294	0.133425	11.4142	3.55e-30	2.17e-28
Gh_A01G2021	240.317	1.52289	0.223854	6.80304	1.02e-11	1.49e-10
Gh_D03G0069	1109.79	1.52271	0.250786	6.07174	1.27e-09	1.43e-08
Gh_A13G1386	58.7235	1.52196	0.295618	5.14839	2.63e-07	2.12e-06
Gh_D13G0189	422.725	1.52172	0.251183	6.05821	1.38e-09	1.55e-08
Gh_Sca005431G01	538.873	1.52086	0.399813	3.80393	0.000142418	0.000695611
Gh_Sca013666G01	14.2846	1.52035	0.432787	3.51293	0.000443192	0.00192506
Gh_D02G0449	109.765	1.52009	0.410825	3.70008	0.000215528	0.00101026
Gh_D13G2315	1291.42	1.51996	0.172035	8.83517	1e-18	2.89e-17
Gh_D09G0408	36.1917	1.51995	0.404154	3.76081	0.000169362	0.000813398
Gh_D09G0855	102.026	1.51939	0.457687	3.31971	0.000901099	0.0036237
Gh_A06G1769	12.3289	1.51907	0.51183	2.96792	0.00299822	0.0104405
Gh_D12G2263	125.864	1.51839	0.239071	6.35121	2.14e-10	2.64e-09
Gh_D02G0994	35.1437	1.5183	0.406931	3.7311	0.000190642	0.000904798
Gh_A10G0299	13.2511	1.51784	0.496566	3.05667	0.00223809	0.0080834
Gh_D05G0161	902.562	1.51769	0.50017	3.03435	0.00241051	0.00861984
Gh_A03G0329	27.436	1.51752	0.401802	3.77679	0.00015886	0.00076767
Gh_D05G1341	8.84814	1.51738	0.531926	2.85261	0.00433622	0.0143884
Gh_Sca031901G01	26.9131	1.51729	0.381179	3.98052	6.88e-05	0.000359678
Gh_A05G0131	69.6927	1.51694	0.536268	2.8287	0.0046737	0.015355
Gh_A07G0774	121.913	1.51674	0.383956	3.9503	7.81e-05	0.000402713
Gh_A01G1946	89.2391	1.51637	0.264185	5.73979	9.48e-09	9.55e-08
Gh_D11G0246	317.66	1.51583	0.529012	2.8654	0.00416486	0.0138972
Gh_D06G1197	28.7831	1.51572	0.368213	4.11641	3.85e-05	0.00021227
Gh_D10G2442	204.127	1.51532	0.201704	7.5126	5.8e-14	1.08e-12
Gh_A05G0803	1845.72	1.51513	0.101733	14.8932	3.65e-50	5.1e-48
Gh_A13G1806	139.267	1.51471	0.385909	3.92504	8.67e-05	0.000443484
Gh_D08G0592	159.012	1.51442	0.210287	7.20167	5.95e-13	9.89e-12
Gh_D04G0289	240.188	1.51436	0.494006	3.06546	0.00217334	0.00787697
Gh_A11G1160	201.179	1.51432	0.181297	8.3527	6.67e-17	1.64e-15
Gh_A13G1155	113.914	1.51414	0.266002	5.6922	1.25e-08	1.24e-07
Gh_D08G0751	664.997	1.51413	0.503409	3.00775	0.00263187	0.00931311
Gh_D11G2609	553.881	1.5138	0.142871	10.5956	3.12e-26	1.52e-24
Gh_D07G2174	913.101	1.51286	0.168181	8.99543	2.35e-19	7.12e-18
Gh_D11G0271	58.4541	1.51243	0.442342	3.41914	0.0006282	0.00263187
Gh_A05G0697	49.2224	1.51182	0.307964	4.90908	9.15e-07	6.79e-06
Gh_D10G1874	233.002	1.51164	0.283255	5.33668	9.47e-08	8.2e-07
Gh_D09G0854	417.409	1.51121	0.509234	2.96761	0.00300124	0.0104503
Gh_D07G0537	1451.4	1.511	0.149104	10.1339	3.91e-24	1.64e-22
Gh_D07G1703	80.2574	1.51093	0.425017	3.55498	0.000378007	0.00166537
Gh_A10G1547	167.932	1.5108	0.225605	6.69666	2.13e-11	2.98e-10
Gh_A02G1313	490.294	1.51068	0.39451	3.82926	0.000128527	0.000634426
Gh_D13G1760	151.684	1.51011	0.177024	8.53054	1.46e-17	3.82e-16
Gh_A10G1719	16431.1	1.5101	0.153516	9.83676	7.82e-23	3.01e-21
Gh_A12G2129	91.7743	1.5093	0.258783	5.8323	5.47e-09	5.69e-08
Gh_D07G0969	686.105	1.50892	0.153617	9.82259	9e-23	3.45e-21
Gh_A06G1542	194.342	1.5085	0.531959	2.83574	0.00457195	0.0150673
Gh_D10G1579	1444.55	1.50839	0.118912	12.6849	7.17e-37	6.07e-35
Gh_D05G3738	120.281	1.50712	0.307545	4.90049	9.56e-07	7.08e-06
Gh_D06G1528	139.497	1.50632	0.253837	5.93421	2.95e-09	3.19e-08
Gh_D11G1258	22.3497	1.50611	0.481808	3.12595	0.00177233	0.0065817
Gh_A02G0748	9.74971	1.50584	0.478585	3.14645	0.00165265	0.00619873
Gh_D12G0971	11.7386	1.50528	0.499234	3.01519	0.00256822	0.00911479
Gh_A05G3832	944.133	1.50516	0.134746	11.1703	5.7e-29	3.29e-27
Gh_D11G0818	329.072	1.50467	0.190628	7.89321	2.95e-15	6.23e-14
Gh_D02G0215	20.1479	1.5045	0.529368	2.84207	0.00448212	0.0148081
Gh_A10G2351	169.315	1.50443	0.363272	4.14133	3.45e-05	0.000192469
Gh_Sca119114G01	95.2452	1.50332	0.322952	4.65494	3.24e-06	2.2e-05
Gh_D05G3688	50.1111	1.50291	0.409808	3.66734	0.000245086	0.00113293
Gh_A10G0617	13.5079	1.50285	0.439987	3.41568	0.000636233	0.00266178
Gh_A09G0213	1102.51	1.50279	0.128041	11.7368	8.26e-32	5.45e-30
Gh_A10G0347	104.421	1.50236	0.34188	4.39441	1.11e-05	6.82e-05
Gh_D02G1657	62.7439	1.50164	0.320952	4.6787	2.89e-06	1.97e-05
Gh_D05G2547	17.6806	1.50155	0.451943	3.32242	0.000892393	0.00359281
Gh_D05G1815	217.584	1.50126	0.277268	5.41449	6.15e-08	5.49e-07
Gh_A10G0474	623.12	1.50079	0.506138	2.96517	0.00302517	0.0105245
Gh_D12G2698	5.92906	1.50052	0.532802	2.81628	0.00485828	0.0158782
Gh_D11G0259	11.6488	1.50004	0.484289	3.09741	0.00195219	0.00716558
Gh_A07G0030	24.9585	1.49931	0.453128	3.30879	0.000937012	0.00375316
Gh_D12G0127	40.5257	1.4988	0.350155	4.28038	1.87e-05	0.000109991
Gh_D11G1886	97.106	1.49841	0.269486	5.56025	2.69e-08	2.55e-07
Gh_D11G2042	18.4846	1.49807	0.417779	3.5858	0.000336049	0.00150187
Gh_A12G0408	629.957	1.49789	0.117091	12.7925	1.81e-37	1.57e-35
Gh_D04G0082	178.273	1.49766	0.178173	8.40567	4.25e-17	1.06e-15
Gh_D11G0181	5082.54	1.49758	0.148599	10.078	6.92e-24	2.84e-22
Gh_D02G1738	182.085	1.49704	0.26133	5.72854	1.01e-08	1.02e-07
Gh_A10G1645	1040.76	1.4961	0.112921	13.2491	4.56e-40	4.4e-38
Gh_D02G1824	56.8032	1.49577	0.351079	4.2605	2.04e-05	0.000119229
Gh_A11G0491	39.29	1.49567	0.448172	3.33728	0.000846038	0.00342192
Gh_D08G2329	45.9471	1.49441	0.35453	4.21519	2.5e-05	0.000143147
Gh_D12G2339	522.601	1.49419	0.159064	9.39363	5.8e-21	1.98e-19
Gh_D13G1392	964.064	1.4936	0.158754	9.40826	5.04e-21	1.73e-19
Gh_A13G1682	6.23106	1.49238	0.530986	2.81058	0.00494522	0.016096
Gh_A04G0281	208.977	1.49216	0.232577	6.41576	1.4e-10	1.77e-09
Gh_A11G3269	323.405	1.49214	0.152583	9.77923	1.38e-22	5.26e-21
Gh_A09G0091	78.0572	1.49206	0.263763	5.6568	1.54e-08	1.51e-07
Gh_A11G2298	607.699	1.49184	0.139366	10.7045	9.7e-27	4.85e-25
Gh_D01G0856	116.21	1.49173	0.289429	5.15403	2.55e-07	2.06e-06
Gh_A01G0289	503.595	1.49103	0.155377	9.59621	8.29e-22	3e-20
Gh_A01G0974	764.3	1.49019	0.14326	10.402	2.43e-25	1.1e-23
Gh_A02G0549	7.2824	1.49003	0.535199	2.78406	0.00536827	0.0172821
Gh_D02G2393	315.513	1.48907	0.16313	9.1281	6.97e-20	2.18e-18
Gh_A08G1822	201.303	1.48874	0.264154	5.63588	1.74e-08	1.69e-07
Gh_D06G1651	55.1896	1.48833	0.398971	3.73042	0.000191161	0.000906973
Gh_A13G2247	1072.84	1.4878	0.0985984	15.0895	1.9e-51	2.82e-49
Gh_A08G1653	12.3159	1.48742	0.479465	3.10224	0.00192062	0.00706451
Gh_A04G0081	149.922	1.48681	0.212342	7.00195	2.52e-12	3.91e-11
Gh_D02G1287	23.2373	1.48675	0.4427	3.35837	0.000784024	0.00319739
Gh_A01G1781	89.1669	1.48674	0.246192	6.03893	1.55e-09	1.73e-08
Gh_A13G1461	101.746	1.48646	0.291547	5.09854	3.42e-07	2.72e-06
Gh_D05G0893	59.629	1.48586	0.357335	4.15817	3.21e-05	0.000179901
Gh_D12G1980	368.249	1.48505	0.150113	9.89286	4.47e-23	1.75e-21
Gh_D07G0830	208.644	1.48449	0.191305	7.75982	8.5e-15	1.73e-13
Gh_A09G2247	880.73	1.4843	0.207328	7.15917	8.12e-13	1.33e-11
Gh_D06G2073	25.4745	1.48391	0.534339	2.7771	0.0054847	0.0176055
Gh_Sca118137G01	5.45647	1.48372	0.529597	2.8016	0.00508496	0.0164794
Gh_D13G1524	41.6018	1.48334	0.323369	4.58715	4.49e-06	2.97e-05
Gh_D13G0368	400.934	1.48319	0.159827	9.27995	1.7e-20	5.55e-19
Gh_Sca061013G01	5.6959	1.48311	0.520643	2.84862	0.00439096	0.0145514
Gh_A05G0109	51.0697	1.48301	0.362084	4.09576	4.21e-05	0.000229838
Gh_A07G1840	21.5323	1.48267	0.41022	3.61433	0.00030112	0.00136166
Gh_D07G2223	13.9944	1.48207	0.537484	2.75742	0.00582596	0.0185489
Gh_D03G1239	128.204	1.482	0.29835	4.96733	6.79e-07	5.14e-06
Gh_A10G1121	164.112	1.48163	0.212749	6.96422	3.3e-12	5.04e-11
Gh_A11G0196	5.72224	1.48158	0.519353	2.85275	0.00433428	0.0143836
Gh_D12G1110	41.1035	1.48113	0.367586	4.02935	5.59e-05	0.000298643
Gh_D13G0746	51.7322	1.48007	0.312088	4.74248	2.11e-06	1.48e-05
Gh_D11G0574	29.6357	1.47991	0.485201	3.05011	0.00228761	0.00823923
Gh_A07G0290	59.9615	1.47903	0.294072	5.02949	4.92e-07	3.81e-06
Gh_D10G1898	914.792	1.47898	0.134519	10.9946	4.06e-28	2.22e-26
Gh_D02G0931	583.613	1.4781	0.196981	7.50373	6.2e-14	1.15e-12
Gh_D09G1222	390.454	1.47788	0.144856	10.2024	1.93e-24	8.27e-23
Gh_D13G1471	220.305	1.47758	0.324925	4.54746	5.43e-06	3.53e-05
Gh_D05G0844	66.8151	1.47752	0.248122	5.9548	2.6e-09	2.83e-08
Gh_D04G1367	277.351	1.4775	0.201742	7.32374	2.41e-13	4.22e-12
Gh_D04G0146	2172.04	1.47663	0.134894	10.9466	6.9e-28	3.72e-26
Gh_D08G1286	110.867	1.47657	0.271729	5.43399	5.51e-08	4.96e-07
Gh_A11G0489	44.9809	1.47555	0.347178	4.25013	2.14e-05	0.000124314
Gh_A05G0784	62.6513	1.47519	0.263886	5.59026	2.27e-08	2.17e-07
Gh_D09G1732	13.4515	1.47494	0.467556	3.15458	0.00160729	0.00605035
Gh_A07G0483	60.4815	1.47485	0.313267	4.70797	2.5e-06	1.73e-05
Gh_A04G1415	36.6836	1.47455	0.356292	4.13859	3.49e-05	0.00019458
Gh_A04G0867	352.098	1.47446	0.161391	9.13598	6.48e-20	2.03e-18
Gh_D12G0095	12.6985	1.47446	0.517665	2.84829	0.00439551	0.0145624
Gh_A09G1796	775.023	1.47419	0.175718	8.38951	4.88e-17	1.21e-15
Gh_Sca054775G01	141.375	1.47413	0.237206	6.21455	5.15e-10	6.1e-09
Gh_A03G0758	37.3387	1.4741	0.428744	3.43819	0.000585616	0.00246893
Gh_A12G0982	595.893	1.47308	0.185584	7.93751	2.06e-15	4.43e-14
Gh_A05G1096	66.1774	1.47262	0.400415	3.67773	0.000235315	0.00109277
Gh_D02G2058	719.237	1.4726	0.123141	11.9586	5.86e-33	4.17e-31
Gh_D10G2452	258.521	1.47237	0.298266	4.93641	7.96e-07	5.97e-06
Gh_A03G0664	71.2808	1.47186	0.310619	4.73848	2.15e-06	1.51e-05
Gh_D06G1476	2584.95	1.47005	0.171099	8.59183	8.56e-18	2.29e-16
Gh_A07G0785	348.809	1.47001	0.203942	7.20802	5.68e-13	9.46e-12
Gh_D07G2180	65.6794	1.46966	0.293559	5.00636	5.55e-07	4.27e-06
Gh_A12G0625	218.678	1.46949	0.184439	7.96732	1.62e-15	3.53e-14
Gh_D07G2241	402.049	1.46924	0.163424	8.99033	2.46e-19	7.45e-18
Gh_A02G0964	197.358	1.46876	0.232056	6.32933	2.46e-10	3.02e-09
Gh_A12G1762	87.4679	1.46862	0.2753	5.33461	9.57e-08	8.28e-07
Gh_A03G1432	2628.1	1.4686	0.328144	4.47548	7.62e-06	4.83e-05
Gh_D03G1732	35.3346	1.46826	0.342954	4.28122	1.86e-05	0.000109608
Gh_D05G0803	1491.37	1.46758	0.132462	11.0793	1.58e-28	8.95e-27
Gh_A01G0596	64.148	1.46744	0.319291	4.59593	4.31e-06	2.86e-05
Gh_D09G1859	115.114	1.46723	0.27188	5.39662	6.79e-08	6.02e-07
Gh_D11G2567	20.8243	1.46714	0.534438	2.7452	0.0060474	0.0191688
Gh_A05G2712	5.20307	1.46697	0.536028	2.73674	0.00620506	0.0195986
Gh_A09G1638	13.3575	1.46695	0.48207	3.04303	0.0023421	0.008407
Gh_D06G0279	147.776	1.46642	0.185422	7.90856	2.6e-15	5.54e-14
Gh_D13G1594	24.8319	1.46618	0.408215	3.59169	0.000328544	0.00147186
Gh_D13G0812	60.4689	1.46596	0.323746	4.52812	5.95e-06	3.85e-05
Gh_A04G0806	138.476	1.46585	0.312005	4.69816	2.63e-06	1.81e-05
Gh_A13G1440	12.9863	1.46449	0.50436	2.90366	0.00368823	0.0125202
Gh_D13G1749	173.812	1.46408	0.213744	6.8497	7.4e-12	1.09e-10
Gh_D01G0498	146.858	1.46395	0.250932	5.83407	5.41e-09	5.63e-08
Gh_D03G0884	53.7256	1.46282	0.357672	4.08983	4.32e-05	0.000235211
Gh_A10G1745	887.242	1.46277	0.120585	12.1306	7.27e-34	5.4e-32
Gh_D05G2019	154.723	1.46225	0.259931	5.62554	1.85e-08	1.79e-07
Gh_D08G1066	524.264	1.46164	0.208124	7.02291	2.17e-12	3.39e-11
Gh_D09G2400	74.7263	1.4612	0.280039	5.21783	1.81e-07	1.5e-06
Gh_A05G1448	18.231	1.46106	0.518843	2.81599	0.0048627	0.0158891
Gh_D09G1919	879.533	1.45997	0.177825	8.21017	2.21e-16	5.2e-15
Gh_D11G0650	70.6351	1.45955	0.325389	4.48555	7.27e-06	4.62e-05
Gh_A07G1559	239.709	1.45885	0.461079	3.16399	0.00155622	0.00587891
Gh_D02G0316	50.5567	1.4587	0.31493	4.63181	3.62e-06	2.44e-05
Gh_D08G0051	335.127	1.45869	0.474236	3.07587	0.0020989	0.00764546
Gh_A09G0274	69.707	1.45795	0.34048	4.28205	1.85e-05	0.000109258
Gh_D08G2040	11.1483	1.45759	0.509841	2.85891	0.00425103	0.0141412
Gh_A04G0614	345.639	1.45742	0.187925	7.75537	8.81e-15	1.79e-13
Gh_A05G1576	103.122	1.45719	0.348597	4.18014	2.91e-05	0.000164966
Gh_D02G2143	63.2993	1.45718	0.274931	5.30018	1.16e-07	9.88e-07
Gh_D12G2089	1154.35	1.45718	0.12396	11.7553	6.64e-32	4.4e-30
Gh_A03G1251	55.4598	1.45654	0.320621	4.54287	5.55e-06	3.6e-05
Gh_D08G0893	377.549	1.4564	0.150461	9.67961	3.68e-22	1.36e-20
Gh_D05G2938	204.282	1.45626	0.206567	7.04981	1.79e-12	2.82e-11
Gh_A08G2114	637.381	1.45615	0.503344	2.89294	0.00381651	0.0128932
Gh_A06G0518	174.271	1.45599	0.163793	8.88916	6.16e-19	1.8e-17
Gh_D05G0227	543.715	1.45592	0.203821	7.14313	9.12e-13	1.48e-11
Gh_A04G0329	75.5172	1.45585	0.31217	4.66365	3.11e-06	2.12e-05
Gh_A09G0062	2063.73	1.45521	0.0781184	18.6282	1.9e-77	7.43e-75
Gh_D06G2156	114.612	1.45503	0.335498	4.33694	1.44e-05	8.7e-05
Gh_A06G1078	9.55123	1.45481	0.521862	2.78773	0.00530784	0.0171107
Gh_A12G0742	171.031	1.45463	0.262091	5.55009	2.86e-08	2.69e-07
Gh_A06G1744	445.27	1.45396	0.153273	9.48614	2.4e-21	8.4e-20
Gh_D09G2265	37.3593	1.45389	0.431358	3.37048	0.000750366	0.0030755
Gh_D02G2373	186.828	1.45345	0.256869	5.65832	1.53e-08	1.5e-07
Gh_D03G1329	28.8635	1.45334	0.387783	3.74781	0.000178389	0.00085194
Gh_A09G1797	563.296	1.45247	0.190694	7.61676	2.6e-14	5.05e-13
Gh_A11G2489	335.344	1.45235	0.170142	8.53607	1.39e-17	3.65e-16
Gh_D03G1484	73.0203	1.45204	0.421695	3.44335	0.000574556	0.00242694
Gh_D03G0272	62.0323	1.45197	0.368065	3.94486	7.98e-05	0.00041083
Gh_D05G3202	1188.94	1.45049	0.179904	8.06256	7.47e-16	1.68e-14
Gh_D12G0915	1204.63	1.45023	0.167209	8.67314	4.2e-18	1.15e-16
Gh_D07G0974	2641.72	1.44925	0.162571	8.91456	4.9e-19	1.45e-17
Gh_A12G0644	267.94	1.44922	0.194828	7.43847	1.02e-13	1.85e-12
Gh_D10G0360	974.879	1.44837	0.114961	12.5988	2.14e-36	1.78e-34
Gh_D03G1686	229.344	1.44826	0.250682	5.77727	7.59e-09	7.76e-08
Gh_D05G1762	71.3408	1.44819	0.352937	4.10324	4.07e-05	0.000223284
Gh_A03G1866	10.7688	1.44766	0.517674	2.79647	0.00516634	0.0167098
Gh_A13G1148	1498.43	1.44738	0.0926185	15.6274	4.74e-55	7.95e-53
Gh_D09G0270	739.547	1.44715	0.164114	8.81797	1.17e-18	3.35e-17
Gh_A11G0413	43.6782	1.44702	0.374068	3.86835	0.000109576	0.00054922
Gh_D13G2381	222.597	1.44624	0.334512	4.32345	1.54e-05	9.21e-05
Gh_D03G0901	35.9195	1.44621	0.363814	3.97515	7.03e-05	0.000366842
Gh_A09G1697	5.10906	1.44568	0.536133	2.6965	0.00700722	0.0217435
Gh_D11G2238	738.306	1.44564	0.257702	5.60975	2.03e-08	1.95e-07
Gh_D01G1972	6.85933	1.44531	0.530419	2.72484	0.00643326	0.0202229
Gh_D07G0322	630.496	1.44463	0.197185	7.32628	2.37e-13	4.14e-12
Gh_D10G1671	13.9785	1.44416	0.529881	2.72545	0.00642146	0.020189
Gh_D12G0855	448.467	1.44252	0.205578	7.01691	2.27e-12	3.54e-11
Gh_D13G1264	5.66449	1.4425	0.533417	2.70426	0.00684576	0.0213102
Gh_A07G1351	587.921	1.44184	0.217427	6.6314	3.33e-11	4.53e-10
Gh_D08G2487	716.932	1.44177	0.499762	2.88492	0.00391515	0.0131733
Gh_A13G0910	30.3948	1.44093	0.39369	3.66007	0.000252149	0.00116188
Gh_A02G0889	9.75887	1.44043	0.506987	2.84115	0.00449514	0.0148446
Gh_A07G1882	13.274	1.43982	0.49878	2.88667	0.0038934	0.0131098
Gh_D13G0244	5.30919	1.4398	0.52766	2.72865	0.00635935	0.0200243
Gh_A11G2460	19.7497	1.43976	0.485388	2.96622	0.00301489	0.010493
Gh_A06G1832	19.2694	1.43963	0.477588	3.01439	0.00257499	0.00913665
Gh_A10G1052	33.6048	1.4396	0.357723	4.02435	5.71e-05	0.000304441
Gh_D11G0754	1402.6	1.43935	0.136608	10.5364	5.87e-26	2.77e-24
Gh_D13G1189	35.7953	1.43923	0.4851	2.96687	0.0030085	0.0104738
Gh_A10G1460	72.6125	1.43795	0.484692	2.96673	0.00300984	0.0104766
Gh_D07G1757	21.5608	1.43784	0.42713	3.36627	0.000761908	0.00311573
Gh_D12G1577	16.3067	1.43762	0.472497	3.04261	0.00234535	0.00841819
Gh_A09G0256	9.67769	1.43657	0.523369	2.74484	0.00605404	0.0191878
Gh_A07G2283	294.729	1.43593	0.146758	9.78438	1.31e-22	5e-21
Gh_A08G2237	59.1153	1.43574	0.31756	4.52116	6.15e-06	3.96e-05
Gh_D12G0974	784.986	1.43559	0.220407	6.51336	7.35e-11	9.56e-10
Gh_D07G0448	606.691	1.43532	0.187434	7.65774	1.89e-14	3.72e-13
Gh_D05G3178	276.765	1.43496	0.233101	6.15598	7.46e-10	8.69e-09
Gh_D13G1596	311.802	1.43449	0.153624	9.3377	9.84e-21	3.29e-19
Gh_D03G1013	311.679	1.43439	0.462661	3.1003	0.00193322	0.00710603
Gh_D09G1786	15.8249	1.43433	0.447778	3.20323	0.00135897	0.0052145
Gh_A12G0700	767.293	1.4339	0.371786	3.85678	0.00011489	0.000573537
Gh_D11G2471	1220.44	1.4336	0.135056	10.6149	2.54e-26	1.24e-24
Gh_A08G1647	441.392	1.43303	0.495885	2.88984	0.00385442	0.0129991
Gh_D12G0519	183.353	1.43288	0.204759	6.9979	2.6e-12	4.02e-11
Gh_A11G2899	11.0238	1.43248	0.499934	2.86533	0.00416573	0.0138986
Gh_Sca130963G01	4.11651	1.43158	0.534739	2.67716	0.00742481	0.0228901
Gh_A06G0514	1060.11	1.43157	0.127713	11.2093	3.67e-29	2.14e-27
Gh_A09G1748	1467.04	1.43113	0.163537	8.75113	2.11e-18	5.93e-17
Gh_D12G0551	624.57	1.43089	0.173562	8.24427	1.66e-16	3.96e-15
Gh_D10G1708	366.662	1.43044	0.188464	7.59	3.2e-14	6.17e-13
Gh_A08G2500	76.6731	1.43043	0.239596	5.97017	2.37e-09	2.59e-08
Gh_D02G0453	1113.02	1.43008	0.42229	3.38649	0.000707918	0.00292448
Gh_A03G1331	134.764	1.42899	0.355349	4.02138	5.79e-05	0.000307938
Gh_A08G1267	2189.61	1.42855	0.182582	7.82417	5.11e-15	1.06e-13
Gh_D01G0500	75.1011	1.42793	0.335945	4.25049	2.13e-05	0.000124153
Gh_A02G0074	133.259	1.42774	0.196991	7.24776	4.24e-13	7.18e-12
Gh_D06G0091	3.94903	1.42733	0.530512	2.69048	0.00713486	0.0220981
Gh_D08G1986	25.0235	1.42733	0.400418	3.56459	0.000364425	0.00161342
Gh_D12G2103	23.209	1.42726	0.476299	2.99656	0.00273044	0.00962167
Gh_A08G1370	35.0582	1.42702	0.382554	3.73024	0.000191295	0.00090746
Gh_Sca005023G02	12.3008	1.427	0.484336	2.9463	0.00321604	0.011108
Gh_D10G0700	82.2097	1.42697	0.328711	4.3411	1.42e-05	8.55e-05
Gh_A06G1558	21.7457	1.42673	0.419197	3.40347	0.000665358	0.00276941
Gh_A11G0280	452.155	1.42631	0.175305	8.13618	4.08e-16	9.4e-15
Gh_D10G2401	279.133	1.42627	0.215508	6.6182	3.64e-11	4.92e-10
Gh_D11G0794	56.0705	1.42594	0.367526	3.87982	0.000104533	0.000526023
Gh_D11G1507	9.25306	1.42583	0.505526	2.82049	0.004795	0.0156998
Gh_A03G0497	62.1315	1.42571	0.346599	4.11343	3.9e-05	0.000214717
Gh_D10G1540	1380	1.42533	0.414444	3.43914	0.000583558	0.00246112
Gh_A08G0799	63.033	1.42487	0.295027	4.82962	1.37e-06	9.87e-06
Gh_A06G1342	38.4247	1.42479	0.336346	4.23608	2.27e-05	0.000131694
Gh_A05G3034	19.3813	1.42439	0.449317	3.17012	0.00152376	0.00576653
Gh_D10G0420	399.477	1.42356	0.282334	5.0421	4.6e-07	3.59e-06
Gh_A05G0471	161.743	1.42351	0.188392	7.55611	4.15e-14	7.9e-13
Gh_A07G2278	321.616	1.42327	0.189603	7.50655	6.07e-14	1.13e-12
Gh_A08G1860	102.909	1.42311	0.250937	5.67119	1.42e-08	1.4e-07
Gh_D11G2289	1990.43	1.42309	0.115732	12.2964	9.47e-35	7.28e-33
Gh_D12G0682	4.4063	1.42304	0.535113	2.65933	0.00782966	0.0239325
Gh_D04G0316	446.577	1.42275	0.188545	7.54592	4.49e-14	8.5e-13
Gh_D02G0648	329.755	1.42272	0.231341	6.1499	7.75e-10	9e-09
Gh_D11G2800	109.703	1.42262	0.323095	4.4031	1.07e-05	6.57e-05
Gh_Sca005103G01	67.8485	1.42211	0.323158	4.40067	1.08e-05	6.64e-05
Gh_D05G0556	89.9599	1.42117	0.273555	5.19519	2.05e-07	1.67e-06
Gh_D08G1506	18.5683	1.42058	0.492018	2.88725	0.00388626	0.0130939
Gh_A06G0367	619.392	1.42048	0.203006	6.99721	2.61e-12	4.04e-11
Gh_D05G2657	162.579	1.42024	0.214635	6.61698	3.67e-11	4.96e-10
Gh_D12G0276	34.0212	1.4198	0.343817	4.12952	3.64e-05	0.000201611
Gh_D11G0776	4.00472	1.41935	0.529224	2.68194	0.00731969	0.0226011
Gh_D13G0291	56.0259	1.41916	0.395107	3.59184	0.000328345	0.00147119
Gh_D12G1805	44.2737	1.41866	0.358163	3.96093	7.47e-05	0.000386917
Gh_A03G2139	416.718	1.41863	0.189212	7.49755	6.5e-14	1.21e-12
Gh_D03G0273	11.6773	1.41829	0.498483	2.84521	0.00443828	0.0146894
Gh_A01G0985	32.3945	1.41828	0.417081	3.40048	0.000672665	0.0027951
Gh_D13G0012	57.3433	1.41801	0.337993	4.19538	2.72e-05	0.000155035
Gh_A04G0789	171.001	1.41712	0.253612	5.58775	2.3e-08	2.2e-07
Gh_A10G1973	399.992	1.41677	0.178441	7.93968	2.03e-15	4.36e-14
Gh_A02G1109	252.082	1.41642	0.196332	7.2144	5.42e-13	9.06e-12
Gh_D06G2256	307.687	1.41619	0.234843	6.03035	1.64e-09	1.82e-08
Gh_A12G1270	1253.07	1.41614	0.236763	5.98127	2.21e-09	2.43e-08
Gh_A08G0173	2596.1	1.41614	0.140183	10.1021	5.41e-24	2.24e-22
Gh_D07G0449	402.057	1.41535	0.450067	3.14476	0.00166224	0.00622923
Gh_D03G0703	19.7399	1.41526	0.464762	3.04512	0.00232588	0.00835583
Gh_D12G2429	110.072	1.41491	0.308476	4.58679	4.5e-06	2.98e-05
Gh_A03G0983	326.106	1.41469	0.128458	11.0129	3.31e-28	1.84e-26
Gh_A07G0899	45.7682	1.41465	0.374911	3.7733	0.000161101	0.000777615
Gh_D13G1381	101.758	1.41463	0.246873	5.7302	1e-08	1.01e-07
Gh_A01G0939	209.164	1.41377	0.183849	7.68987	1.47e-14	2.93e-13
Gh_A11G2854	107.093	1.41376	0.255411	5.53521	3.11e-08	2.92e-07
Gh_Sca106915G01	4.90496	1.41358	0.534174	2.64629	0.00813796	0.0247263
Gh_A12G0698	8.37491	1.41357	0.494904	2.85625	0.00428684	0.0142452
Gh_D02G1909	10.0289	1.41293	0.497203	2.84175	0.0044867	0.0148216
Gh_Sca005400G01	88.7082	1.4129	0.304867	4.63448	3.58e-06	2.41e-05
Gh_D11G0345	41.7455	1.41281	0.372063	3.79723	0.000146322	0.000712578
Gh_Sca009206G01	110.131	1.41221	0.311489	4.53373	5.8e-06	3.75e-05
Gh_D05G0991	5.09971	1.41194	0.533131	2.64839	0.00808762	0.0245972
Gh_D05G1259	95.9801	1.41159	0.263629	5.35446	8.58e-08	7.49e-07
Gh_D12G1907	724.226	1.41098	0.136856	10.31	6.35e-25	2.79e-23
Gh_A08G0098	13.9305	1.41062	0.466563	3.02343	0.00249926	0.00889763
Gh_A09G0438	190.572	1.4102	0.212568	6.6341	3.26e-11	4.45e-10
Gh_A05G0325	821.525	1.41008	0.17377	8.11463	4.87e-16	1.12e-14
Gh_A08G1194	191.158	1.41003	0.188317	7.48755	7.02e-14	1.3e-12
Gh_A01G1484	76.0992	1.40998	0.277781	5.07586	3.86e-07	3.04e-06
Gh_A12G0977	12.5212	1.40923	0.456055	3.09005	0.00200126	0.00732897
Gh_D05G2906	229.265	1.40839	0.32585	4.32219	1.54e-05	9.26e-05
Gh_D04G0666	92.1679	1.40797	0.338112	4.1642	3.12e-05	0.000175735
Gh_A07G1464	82.132	1.40721	0.443145	3.17551	0.00149573	0.00567668
Gh_A06G1564	320.258	1.4071	0.198225	7.09849	1.26e-12	2.02e-11
Gh_A05G2615	241.645	1.407	0.220406	6.38365	1.73e-10	2.16e-09
Gh_A13G1438	200.905	1.40695	0.168842	8.33293	7.89e-17	1.93e-15
Gh_D07G2177	14.1209	1.40686	0.535173	2.62879	0.00856883	0.0258442
Gh_A10G2162	128.446	1.40641	0.285831	4.92043	8.64e-07	6.44e-06
Gh_A05G2695	236.394	1.40594	0.253883	5.53775	3.06e-08	2.88e-07
Gh_D08G0619	1291.69	1.40591	0.133197	10.5551	4.81e-26	2.29e-24
Gh_A07G1027	179.942	1.40574	0.245075	5.73594	9.7e-09	9.75e-08
Gh_D11G3442	48.3322	1.40562	0.433277	3.24415	0.00117801	0.00459479
Gh_A12G1039	177.663	1.40557	0.279393	5.03078	4.88e-07	3.79e-06
Gh_A01G1817	1125.96	1.4055	0.0961382	14.6195	2.11e-48	2.76e-46
Gh_D04G0658	200.664	1.40539	0.204767	6.86339	6.72e-12	9.95e-11
Gh_D09G2224	20.5645	1.40505	0.469529	2.99247	0.00276733	0.00973682
Gh_D04G0100	370.653	1.40483	0.167859	8.36911	5.81e-17	1.44e-15
Gh_A06G0842	60.8042	1.4043	0.317419	4.42411	9.68e-06	6.02e-05
Gh_D10G1672	30.4762	1.40386	0.486394	2.88625	0.00389858	0.0131235
Gh_A06G0728	24.5153	1.40381	0.438188	3.20367	0.0013569	0.00520691
Gh_D03G0559	37.5763	1.40291	0.449718	3.11953	0.00181141	0.00671299
Gh_A11G0244	21.841	1.40246	0.43717	3.20805	0.00133637	0.00513707
Gh_D10G0714	24.0337	1.40174	0.494938	2.83215	0.00462359	0.0152105
Gh_A09G0269	753.143	1.40169	0.172159	8.14186	3.89e-16	8.98e-15
Gh_D11G1835	184.651	1.40168	0.213069	6.57855	4.75e-11	6.34e-10
Gh_D12G1570	33.873	1.40142	0.477732	2.93348	0.00335183	0.0115175
Gh_A08G2169	224.384	1.40102	0.283687	4.93859	7.87e-07	5.91e-06
Gh_A12G1487	10.3287	1.40097	0.463758	3.0209	0.00252026	0.00896543
Gh_D09G1346	204.376	1.40058	0.287955	4.86387	1.15e-06	8.41e-06
Gh_D11G0392	24.5003	1.40042	0.532413	2.63032	0.00853039	0.0257399
Gh_D07G0699	967.416	1.4004	0.160303	8.73598	2.42e-18	6.76e-17
Gh_A13G0329	429.833	1.39933	0.138107	10.1322	3.98e-24	1.66e-22
Gh_A10G1134	3387.21	1.3987	0.166081	8.42178	3.71e-17	9.34e-16
Gh_A11G2479	155.19	1.39829	0.321467	4.34971	1.36e-05	8.24e-05
Gh_A09G2488	435.894	1.39809	0.496811	2.81414	0.00489081	0.0159608
Gh_A09G0836	524.169	1.3971	0.463901	3.01164	0.00259843	0.00920939
Gh_A05G3288	618.183	1.39683	0.186167	7.50312	6.23e-14	1.16e-12
Gh_D11G2777	47.0288	1.39658	0.326822	4.27323	1.93e-05	0.000113291
Gh_D10G1050	1758.37	1.3964	0.129492	10.7836	4.11e-27	2.11e-25
Gh_D03G0451	211.112	1.39609	0.393994	3.54342	0.000394974	0.00173243
Gh_A11G1744	4.07787	1.39489	0.529582	2.63395	0.00843967	0.025514
Gh_D11G3227	173.342	1.39447	0.241709	5.7692	7.96e-09	8.11e-08
Gh_A10G0667	23.6072	1.39445	0.511227	2.72766	0.00637854	0.020072
Gh_D05G0845	142.645	1.39428	0.226376	6.1591	7.32e-10	8.53e-09
Gh_D05G2654	19.5489	1.39418	0.462897	3.01186	0.00259651	0.00920422
Gh_A08G0574	1550.67	1.39399	0.144285	9.66136	4.4e-22	1.61e-20
Gh_A06G1772	5.49959	1.39391	0.526425	2.64788	0.00809985	0.0246268
Gh_D04G0924	47.9789	1.39375	0.344932	4.04065	5.33e-05	0.000285634
Gh_D08G1979	323.538	1.39253	0.502811	2.7695	0.00561429	0.0179711
Gh_D05G1837	1340.59	1.39251	0.106928	13.0229	9.07e-39	8.26e-37
Gh_A13G0185	298.941	1.39193	0.24745	5.62511	1.85e-08	1.79e-07
Gh_A05G2224	1028.61	1.39167	0.251077	5.54281	2.98e-08	2.8e-07
Gh_A11G2651	255.48	1.39152	0.227275	6.12262	9.2e-10	1.06e-08
Gh_A08G2115	945.644	1.39151	0.496768	2.80112	0.00509253	0.0165015
Gh_A03G1301	87.2353	1.39101	0.275701	5.04534	4.53e-07	3.53e-06
Gh_A09G0130	103.666	1.39082	0.484616	2.86994	0.0041055	0.0137269
Gh_D12G1030	211.766	1.38974	0.211205	6.58004	4.7e-11	6.28e-10
Gh_A06G0726	29.6212	1.3896	0.48661	2.85567	0.00429464	0.0142647
Gh_A13G1256	59.8963	1.38859	0.292739	4.74343	2.1e-06	1.47e-05
Gh_A10G0472	234.996	1.38844	0.486039	2.85664	0.00428158	0.0142293
Gh_A05G0505	374.141	1.3882	0.186159	7.45708	8.85e-14	1.62e-12
Gh_A01G1959	1236.66	1.38809	0.158287	8.76945	1.8e-18	5.08e-17
Gh_A11G2344	1820.88	1.38796	0.158189	8.77405	1.72e-18	4.89e-17
Gh_D05G0259	132.286	1.38765	0.386341	3.59179	0.000328419	0.00147141
Gh_A06G1225	347.246	1.38764	0.477944	2.90334	0.003692	0.0125309
Gh_A07G0523	90.0837	1.38733	0.342784	4.04723	5.18e-05	0.000278476
Gh_A11G2015	50.586	1.38642	0.421504	3.28923	0.00100461	0.00399537
Gh_D11G0221	10.2594	1.38527	0.438012	3.16263	0.00156349	0.00590301
Gh_A05G3301	13.486	1.38522	0.474522	2.91919	0.00350939	0.0119842
Gh_A09G1721	264.222	1.38497	0.216052	6.41034	1.45e-10	1.83e-09
Gh_A01G1003	24.0447	1.38488	0.452044	3.06359	0.00218699	0.00792044
Gh_D11G0852	1477.09	1.38322	0.164189	8.42457	3.62e-17	9.14e-16
Gh_D08G0035	1858.36	1.38316	0.467906	2.95606	0.00311595	0.0108024
Gh_A07G2150	17.2275	1.38289	0.455268	3.03753	0.00238522	0.00854172
Gh_D12G0168	41.7136	1.38245	0.317606	4.35272	1.34e-05	8.14e-05
Gh_D06G1064	156.345	1.38213	0.207195	6.67066	2.55e-11	3.53e-10
Gh_D08G1373	7.2218	1.38201	0.522379	2.64561	0.00815438	0.0247709
Gh_D10G1703	86.2104	1.38186	0.481275	2.87124	0.00408859	0.0136804
Gh_D05G3103	1068.8	1.3804	0.167365	8.24786	1.61e-16	3.85e-15
Gh_A06G0309	321.007	1.3804	0.194308	7.10419	1.21e-12	1.94e-11
Gh_A05G0733	6.31703	1.38021	0.533757	2.58584	0.00971423	0.028751
Gh_D10G2125	205.202	1.3802	0.216585	6.37257	1.86e-10	2.32e-09
Gh_D05G1481	286.119	1.38018	0.154658	8.92408	4.49e-19	1.33e-17
Gh_A07G0596	379.993	1.38006	0.143436	9.62141	6.49e-22	2.37e-20
Gh_A07G0181	6.01365	1.37979	0.533287	2.58733	0.00967221	0.0286441
Gh_D05G0430	806.936	1.37955	0.208518	6.61595	3.69e-11	4.99e-10
Gh_D01G0960	416.272	1.37947	0.214712	6.42473	1.32e-10	1.67e-09
Gh_A11G2499	5.77213	1.37855	0.532574	2.58846	0.00964067	0.0285631
Gh_A05G0649	22.5542	1.3784	0.379881	3.62852	0.000285054	0.00129545
Gh_D11G2178	292.408	1.3783	0.277329	4.96992	6.7e-07	5.08e-06
Gh_A02G1361	286.693	1.37824	0.42606	3.23485	0.00121708	0.00473137
Gh_Sca196225G01	7.63061	1.37804	0.530907	2.59564	0.00944155	0.0280793
Gh_A08G0331	518.689	1.37786	0.207132	6.65206	2.89e-11	3.98e-10
Gh_D08G0315	15.5094	1.37769	0.518174	2.65873	0.00784354	0.0239662
Gh_A06G0589	51.0177	1.37741	0.499965	2.75502	0.00586884	0.0186674
Gh_A03G0984	522.045	1.37737	0.116014	11.8725	1.65e-32	1.13e-30
Gh_A11G1883	744.467	1.37702	0.211978	6.49605	8.25e-11	1.07e-09
Gh_A10G0250	20.1712	1.37687	0.456977	3.013	0.00258676	0.00917293
Gh_A10G1697	2.26235	1.37673	0.529137	2.60185	0.00927222	0.0276448
Gh_A07G0761	218.456	1.37663	0.188965	7.28514	3.21e-13	5.53e-12
Gh_A12G2655	26.9456	1.37663	0.40853	3.3697	0.000752488	0.00308352
Gh_D03G1258	283.84	1.37637	0.206247	6.67344	2.5e-11	3.46e-10
Gh_D13G1223	367.627	1.37633	0.14498	9.49325	2.24e-21	7.86e-20
Gh_A01G1631	30.7144	1.37615	0.396702	3.46897	0.000522454	0.002229
Gh_A09G1493	49.5054	1.37602	0.322155	4.27128	1.94e-05	0.000114192
Gh_A11G0940	435.6	1.37595	0.155078	8.8726	7.15e-19	2.08e-17
Gh_A08G2548	665.044	1.37565	0.473116	2.90763	0.00364179	0.0123837
Gh_D01G0043	160.201	1.37563	0.2111	6.51647	7.2e-11	9.38e-10
Gh_D07G2135	113.877	1.37503	0.206731	6.65129	2.91e-11	4e-10
Gh_D11G3032	7.9815	1.37425	0.532863	2.579	0.00990878	0.0292425
Gh_A09G0573	460.033	1.37401	0.255447	5.37884	7.5e-08	6.61e-07
Gh_D10G0374	11.2382	1.37336	0.500379	2.74465	0.00605759	0.0191972
Gh_A03G1329	217.398	1.37332	0.25567	5.37147	7.81e-08	6.86e-07
Gh_D09G0148	323.304	1.37328	0.17174	7.99627	1.28e-15	2.81e-14
Gh_A10G1466	95.4938	1.37325	0.375231	3.65974	0.000252472	0.00116301
Gh_D05G0921	1450.8	1.37257	0.112713	12.1776	4.09e-34	3.06e-32
Gh_D04G0718	62.8979	1.37251	0.276921	4.95632	7.18e-07	5.42e-06
Gh_A10G0701	56.3664	1.37244	0.378749	3.6236	0.000290526	0.00131791
Gh_D04G1202	212.188	1.37181	0.289832	4.73312	2.21e-06	1.54e-05
Gh_A12G2292	62.1606	1.37138	0.357052	3.84085	0.00012261	0.000607641
Gh_A09G0780	3.02756	1.37121	0.532894	2.57314	0.010078	0.0296803
Gh_A08G0649	636.133	1.37109	0.4826	2.84104	0.0044966	0.0148477
Gh_D08G0337	48.1922	1.36943	0.391598	3.49703	0.000470461	0.00203076
Gh_A03G0413	25.5329	1.36904	0.386879	3.53868	0.000402126	0.00176121
Gh_D13G1092	5406.6	1.36903	0.119907	11.4174	3.42e-30	2.09e-28
Gh_A06G0937	7.83705	1.36885	0.527286	2.59603	0.00943089	0.0280556
Gh_A10G0194	5.09352	1.36881	0.537804	2.54518	0.0109221	0.03179
Gh_D01G0147	5.71565	1.36855	0.533983	2.56291	0.0103799	0.0304516
Gh_D13G1017	1707.28	1.36848	0.156826	8.72607	2.64e-18	7.34e-17
Gh_A11G2869	313.226	1.36811	0.188558	7.25564	4e-13	6.8e-12
Gh_D12G0697	3112.97	1.36804	0.128091	10.6802	1.26e-26	6.26e-25
Gh_D12G0405	512.524	1.36767	0.164095	8.3346	7.78e-17	1.9e-15
Gh_D02G1947	537.543	1.36718	0.203378	6.72235	1.79e-11	2.52e-10
Gh_A07G2231	1160.94	1.36585	0.161802	8.44153	3.13e-17	7.96e-16
Gh_A10G1456	12.9336	1.36538	0.495371	2.75629	0.00584617	0.0186044
Gh_D10G1702	121.304	1.36519	0.276267	4.94158	7.75e-07	5.82e-06
Gh_D07G2198	8.12015	1.36495	0.506768	2.69344	0.00707195	0.0219226
Gh_A10G0842	22.5939	1.36441	0.439723	3.10288	0.0019165	0.00705414
Gh_D01G0676	3691.22	1.36405	0.125677	10.8536	1.92e-27	1.01e-25
Gh_Sca120753G01	5.87672	1.36311	0.524408	2.59933	0.0093406	0.0278236
Gh_D12G0756	16.348	1.36305	0.423187	3.22091	0.00127783	0.0049401
Gh_D11G0569	29.6841	1.36301	0.453674	3.00438	0.00266124	0.00940398
Gh_A11G2865	382.046	1.36287	0.205647	6.62724	3.42e-11	4.65e-10
Gh_A06G0779	491.345	1.36214	0.206886	6.58402	4.58e-11	6.12e-10
Gh_A11G2794	6.56837	1.36187	0.531295	2.56331	0.0103681	0.0304259
Gh_D08G0648	138.668	1.36164	0.241561	5.63687	1.73e-08	1.68e-07
Gh_A11G1200	410.536	1.36134	0.154229	8.82675	1.08e-18	3.1e-17
Gh_A03G1201	7.50263	1.36055	0.512722	2.65359	0.00796399	0.024282
Gh_A02G0206	1293.98	1.3605	0.138745	9.80575	1.06e-22	4.07e-21
Gh_A02G0868	305.443	1.36047	0.193698	7.02365	2.16e-12	3.38e-11
Gh_D06G0848	29.7672	1.36027	0.481951	2.82241	0.00476635	0.0156232
Gh_D06G1411	409.024	1.36019	0.147308	9.23363	2.62e-20	8.45e-19
Gh_D08G0097	528.343	1.35996	0.22905	5.93741	2.9e-09	3.13e-08
Gh_D05G0153	1296.63	1.35958	0.462862	2.93734	0.00331044	0.0113926
Gh_A05G0315	1853.74	1.35932	0.124168	10.9474	6.84e-28	3.69e-26
Gh_A12G0197	1004.82	1.3592	0.168448	8.06899	7.09e-16	1.6e-14
Gh_A03G0079	85.9655	1.35915	0.29323	4.6351	3.57e-06	2.41e-05
Gh_D04G0480	55.63	1.35812	0.351569	3.86302	0.000111994	0.000560206
Gh_D06G1570	45.5108	1.35805	0.428101	3.17227	0.00151252	0.00573236
Gh_Sca016044G01	515.6	1.35795	0.270181	5.02606	5.01e-07	3.88e-06
Gh_A10G1371	1769.69	1.35793	0.170354	7.97122	1.57e-15	3.42e-14
Gh_A07G0089	455.074	1.35786	0.179623	7.55947	4.05e-14	7.71e-13
Gh_A05G1945	33.2356	1.35778	0.346473	3.91887	8.9e-05	0.000453873
Gh_A11G1360	31.8079	1.35755	0.377177	3.59925	0.000319135	0.00143424
Gh_A10G2283	104.041	1.35746	0.386955	3.50806	0.000451382	0.00195578
Gh_A05G2181	205.535	1.35739	0.242462	5.59835	2.16e-08	2.08e-07
Gh_D02G2442	51.185	1.35686	0.294705	4.60412	4.14e-06	2.76e-05
Gh_A11G2013	26.3656	1.35651	0.538549	2.51882	0.0117749	0.0338748
Gh_D03G0965	2949.42	1.35607	0.123286	10.9994	3.85e-28	2.11e-26
Gh_D12G0571	71.1961	1.35545	0.311711	4.3484	1.37e-05	8.29e-05
Gh_Sca076743G01	33.3149	1.35539	0.408627	3.31694	0.00091009	0.00365689
Gh_A05G1913	159.291	1.35521	0.225954	5.99773	2e-09	2.21e-08
Gh_D02G1079	17.5599	1.35517	0.475499	2.85	0.00437193	0.0144944
Gh_D04G1154	65.6019	1.35513	0.284149	4.76908	1.85e-06	1.31e-05
Gh_A08G0317	115.587	1.35491	0.292791	4.62756	3.7e-06	2.49e-05
Gh_A12G1396	163.257	1.35475	0.485838	2.78848	0.00529558	0.0170758
Gh_A09G2489	594.47	1.35465	0.491151	2.75812	0.00581351	0.0185172
Gh_D12G1766	6.88306	1.35395	0.524113	2.58332	0.00978537	0.0289356
Gh_A05G3141	48.4178	1.35394	0.370161	3.65771	0.000254478	0.00117125
Gh_A10G0704	92.7873	1.35361	0.463035	2.92334	0.00346298	0.0118505
Gh_A06G1139	3199.07	1.35353	0.231971	5.8349	5.38e-09	5.61e-08
Gh_D08G2221	64.793	1.35296	0.338668	3.99493	6.47e-05	0.000340471
Gh_D10G0388	86.4459	1.35266	0.363353	3.72271	0.000197093	0.00093244
Gh_A10G1785	32.425	1.35227	0.371934	3.63578	0.000277142	0.00126374
Gh_D10G1527	72.6191	1.35197	0.270932	4.99005	6.04e-07	4.62e-06
Gh_A08G0933	389.868	1.35175	0.170768	7.91569	2.46e-15	5.25e-14
Gh_D12G1613	7.30076	1.35156	0.516571	2.6164	0.00888634	0.0266518
Gh_D06G1915	563.611	1.35154	0.155022	8.71834	2.82e-18	7.83e-17
[truncated: 6,496 more rows]

## Sheet: 240min
	baseMean	log2FoldChange	lfcSE	stat	pvalue	padj
Gh_D04G1000	67.6709	-1.01245	0.332161	-3.04808	0.0023031	0.049937
Gh_A03G1338	34.8936	-1.15192	0.377852	-3.0486	0.00229913	0.0498868
Gh_A05G3992	685.971	1.38284	0.45356	3.04886	0.00229713	0.049886
Gh_A02G0708	278.939	-1.22823	0.402327	-3.05282	0.00226703	0.0494707
Gh_A04G0923	35.2879	-1.63545	0.535347	-3.05493	0.00225113	0.049338
Gh_D05G0630	67.161	-1.35867	0.443998	-3.06009	0.0022127	0.0487998
Gh_D11G1500	24.9142	1.49228	0.487225	3.06283	0.00219256	0.048578
Gh_D06G0758	70.287	-1.4749	0.48145	-3.06346	0.00218792	0.0484974
Gh_A11G2103	78.0665	-1.0783	0.351876	-3.06444	0.00218077	0.0484075
Gh_A08G0386	51.8773	-1.25323	0.408864	-3.06515	0.0021756	0.0483431
Gh_D06G0208	26.6695	-1.26944	0.414017	-3.06614	0.00216838	0.048264
Gh_A06G1804	23.9851	-1.59364	0.519012	-3.07053	0.00213682	0.0479824
Gh_D08G0089	29.9561	-1.28027	0.416612	-3.07304	0.00211889	0.0476607
Gh_A05G3353	35.9816	1.14748	0.372692	3.07889	0.00207773	0.0472052
Gh_D12G2767	84.0385	-1.00225	0.325387	-3.08018	0.00206875	0.0470454
Gh_D10G2202	1166.11	-1.23509	0.400969	-3.08026	0.00206817	0.0470454
Gh_D06G2277	180.643	-1.46578	0.475337	-3.08367	0.00204467	0.0467274
Gh_D05G1182	130.532	-1.10961	0.359034	-3.09055	0.00199785	0.0460853
Gh_D09G1582	817.373	-1.50353	0.485347	-3.09785	0.0019493	0.045532
Gh_A07G1732	65.1322	-1.14056	0.36792	-3.10001	0.00193512	0.0453324
Gh_A11G2374	26.783	-1.54806	0.499114	-3.10162	0.00192465	0.0452591
Gh_A10G1605	46.989	1.44291	0.464888	3.10379	0.0019106	0.0450426
Gh_A13G1311	39.7199	-1.1577	0.372426	-3.10855	0.00188007	0.0446283
Gh_D07G1197	3933.61	-1.00545	0.323267	-3.11026	0.00186921	0.0445325
Gh_D01G0715	47.9459	-1.23545	0.397073	-3.11138	0.00186213	0.0445091
Gh_D04G1975	132.104	-1.33466	0.427883	-3.11923	0.00181327	0.0437317
Gh_D05G1192	21.5839	-1.1038	0.352969	-3.12718	0.00176493	0.0431933
Gh_D10G2391	37.7432	-1.27985	0.409043	-3.12888	0.00175471	0.0430298
Gh_D05G2770	88.5809	-1.21378	0.38777	-3.13017	0.00174708	0.0429335
Gh_A09G1682	93.9561	-1.26348	0.403388	-3.13217	0.00173522	0.042835
Gh_D05G1321	66.9669	-1.12038	0.357613	-3.13293	0.00173069	0.042767
Gh_A03G1694	51.8034	-1.15014	0.365757	-3.14455	0.00166341	0.041602
Gh_D05G2357	272.64	-1.13462	0.360515	-3.14721	0.00164835	0.0413502
Gh_A03G0247	49.8024	-1.46376	0.464641	-3.1503	0.00163104	0.0410623
Gh_D05G1719	30.9371	1.42817	0.45243	3.15668	0.00159578	0.0404278
Gh_D06G2352	46.756	1.04192	0.32925	3.16453	0.00155333	0.0397915
Gh_D07G2408	34.5469	-1.13745	0.359299	-3.16574	0.0015469	0.0396883
Gh_D10G1949	66.945	-1.00362	0.31697	-3.16628	0.00154401	0.0396585
Gh_D12G1687	101.361	-1.1263	0.355452	-3.16863	0.00153158	0.0394528
Gh_A09G0182	45.267	-1.3638	0.430378	-3.16884	0.00153046	0.0394528
Gh_Sca010764G01	209.819	-1.69238	0.534001	-3.16925	0.00152833	0.0394444
Gh_A01G0469	165.668	-1.03098	0.324166	-3.1804	0.00147072	0.0383341
Gh_D12G1496	238.977	-1.06969	0.335842	-3.18511	0.00144701	0.0379967
Gh_Sca005221G01	34.1109	-1.47936	0.464223	-3.18673	0.00143889	0.037866
Gh_A07G1489	167.965	-1.31005	0.410361	-3.19243	0.00141082	0.0374544
Gh_D13G0968	21.7717	1.33159	0.416728	3.19535	0.00139662	0.0372414
Gh_D06G1980	336.353	-1.04604	0.326884	-3.20002	0.00137416	0.036785
Gh_D05G2299	39.6713	1.08755	0.339386	3.20447	0.00135312	0.0363227
Gh_D09G1508	60.5781	1.1775	0.366851	3.20976	0.00132848	0.0359211
Gh_D11G1052	51.0735	-1.21286	0.377829	-3.21008	0.00132699	0.0359211
Gh_A07G1731	119.964	-1.02533	0.319159	-3.21261	0.00131535	0.0358273
Gh_A01G1439	1227.98	1.35071	0.420143	3.21488	0.00130498	0.0356558
Gh_D13G1806	268.86	-1.09487	0.340359	-3.21681	0.00129624	0.0355478
Gh_D04G0015	67.4268	-1.164	0.361523	-3.2197	0.00128324	0.0353321
Gh_A08G1537	106.202	-1.19435	0.370552	-3.22317	0.0012678	0.0350515
Gh_A08G0826	461.715	-1.3673	0.424214	-3.22313	0.00126796	0.0350515
Gh_A06G1390	334.384	-1.22609	0.379416	-3.23152	0.00123134	0.0345743
Gh_A01G1931	471.367	-1.02541	0.316468	-3.24018	0.00119456	0.0339179
Gh_D05G0548	63.9712	-1.39813	0.430905	-3.24464	0.001176	0.0336925
Gh_D02G1253	1615.11	-1.17531	0.361939	-3.24726	0.00116521	0.0335781
Gh_D09G1839	25.4159	1.28002	0.393525	3.25271	0.00114311	0.0331791
Gh_D11G3525	817.05	-1.22141	0.375006	-3.25705	0.00112577	0.0327746
Gh_D02G1964	198.213	-1.46086	0.448479	-3.25736	0.00112452	0.0327578
Gh_A12G2111	103.382	-1.73658	0.532133	-3.26344	0.00110068	0.0323307
Gh_A02G0260	64.0031	-1.63244	0.499865	-3.26576	0.00109172	0.0321912
Gh_A05G3028	959.259	-1.19916	0.366728	-3.26989	0.00107591	0.0319006
Gh_A03G1631	692.902	-1.4312	0.437602	-3.27054	0.00107343	0.03188
Gh_D04G1835	66.8504	-1.01141	0.307668	-3.28734	0.0010114	0.0307094
Gh_A04G1266	71.9148	-1.07546	0.327155	-3.2873	0.00101152	0.0307094
Gh_D12G1140	284.844	-1.51421	0.46043	-3.28868	0.00100658	0.0306171
Gh_D13G1703	21.9085	-1.77404	0.538393	-3.29508	0.000983951	0.0301956
Gh_D06G1590	91.1563	-1.08441	0.328943	-3.29665	0.000978456	0.0300844
Gh_D01G2155	212.242	-1.37984	0.416827	-3.31034	0.000931813	0.0291605
Gh_D12G1264	105.253	-1.06726	0.322278	-3.31162	0.000927577	0.0290953
Gh_A08G2234	23.3662	-1.7417	0.52466	-3.31967	0.000901248	0.0285856
Gh_D12G2715	239.395	-1.23363	0.371231	-3.32308	0.000890303	0.0283878
Gh_D07G2099	263.256	-1.54601	0.46483	-3.32596	0.000881144	0.0281703
Gh_D08G0952	410.431	-1.418	0.425823	-3.33003	0.000868376	0.027836
Gh_D02G1309	27.7677	-1.27369	0.381004	-3.34297	0.000828857	0.0269641
Gh_D13G1714	23.5191	1.42324	0.42535	3.34604	0.000819753	0.026772
Gh_D13G0232	72.6092	1.27076	0.379683	3.34688	0.000817257	0.0267525
Gh_D12G1398	77.6662	-1.5542	0.463962	-3.34985	0.000808556	0.026554
Gh_A07G1461	140.672	-1.0379	0.309578	-3.35262	0.000800506	0.0264156
Gh_D10G1762	46.9444	-1.07085	0.319361	-3.3531	0.000799106	0.0264156
Gh_D05G0629	39.5692	-1.14211	0.340524	-3.35398	0.000796592	0.026413
Gh_D07G0734	512.38	-1.43611	0.428127	-3.3544	0.000795386	0.0264093
Gh_A11G0222	118.379	1.06594	0.317225	3.36022	0.000778812	0.0259843
Gh_A10G1990	36.9595	-1.48434	0.441192	-3.36438	0.000767167	0.0257025
Gh_A13G1177	94.3521	1.06457	0.316321	3.36549	0.000764088	0.0256293
Gh_A12G1509	135.42	-1.03309	0.306327	-3.37252	0.000744836	0.0252491
Gh_A07G2341	318.894	-1.14486	0.339126	-3.3759	0.000735739	0.0251031
Gh_D13G1719	88.1646	1.4564	0.431258	3.37709	0.000732565	0.0250125
Gh_A07G2338	22.6887	-1.45319	0.430085	-3.37885	0.000727908	0.0249024
Gh_D11G1653	48.9688	-1.02747	0.303765	-3.38244	0.000718446	0.0246932
Gh_D04G1667	61.1854	-1.26844	0.374819	-3.38414	0.000714013	0.0246184
Gh_D13G1325	732.157	1.48197	0.437732	3.38556	0.000710319	0.0245309
Gh_A03G0248	380.101	-1.08203	0.319542	-3.38619	0.000708702	0.024515
Gh_A10G2148	28.4124	-1.43005	0.422347	-3.38597	0.000709282	0.024515
Gh_D02G0837	1101.53	1.24321	0.366651	3.39072	0.000697089	0.0242721
Gh_D08G1728	31.5669	-1.78493	0.526303	-3.39145	0.000695247	0.0242721
Gh_A01G1233	51.3638	-1.44137	0.422942	-3.40796	0.000654495	0.0234019
Gh_D08G1807	99.942	-1.13856	0.333898	-3.40991	0.000649836	0.0232931
Gh_D08G2525	43.0239	-1.15968	0.339624	-3.41461	0.000638726	0.0230147
Gh_D11G0064	36.9333	-1.18362	0.346468	-3.41624	0.000634916	0.022946
Gh_D13G2117	257.382	-1.03305	0.302217	-3.41824	0.000630268	0.0228293
Gh_A13G1565	484.702	-1.48725	0.435069	-3.41842	0.000629865	0.0228293
Gh_D11G2407	47.2363	-1.0462	0.305882	-3.42026	0.00062562	0.0227521
Gh_D02G1518	27.0474	-1.41275	0.413099	-3.41988	0.000626479	0.0227521
Gh_D01G0369	266.112	-1.13122	0.329672	-3.43134	0.000600618	0.0221718
Gh_A07G0146	34.909	-1.40262	0.408396	-3.43445	0.000593749	0.0219856
Gh_D12G0779	231.507	-1.28882	0.37518	-3.4352	0.00059211	0.0219755
Gh_A12G2230	155.913	-1.12583	0.327712	-3.43542	0.000591642	0.0219751
Gh_D02G0560	200.115	-1.09268	0.316843	-3.44866	0.000563382	0.0212965
Gh_D09G0340	103.753	-1.07805	0.312302	-3.45195	0.000556553	0.0211609
Gh_D01G0314	51.8552	1.15334	0.332795	3.46563	0.000528997	0.0204683
Gh_D10G0149	73.1026	1.14928	0.331405	3.4679	0.000524551	0.0203452
Gh_D02G1283	347.327	-1.09465	0.315627	-3.46818	0.000523987	0.0203397
Gh_A12G1474	66.3443	-1.17286	0.338128	-3.4687	0.000522987	0.0203173
Gh_D02G1176	182.455	1.10234	0.317286	3.47427	0.000512248	0.0200292
Gh_D06G2016	71.8441	-1.52097	0.437123	-3.4795	0.000502345	0.0198676
Gh_D06G2021	105.276	-1.47993	0.424132	-3.48931	0.000484266	0.0193221
Gh_D13G0457	730.732	-1.06545	0.305211	-3.49085	0.00048148	0.0192476
Gh_A06G1936	24.475	-1.85649	0.531288	-3.49433	0.00047526	0.0190547
Gh_A12G2190	91.5112	-1.30436	0.372356	-3.50299	0.000460065	0.0186735
Gh_D11G1470	169.721	1.07156	0.305431	3.50837	0.00045086	0.0184266
Gh_D11G2521	100.333	1.00206	0.285457	3.51037	0.000447484	0.0183449
Gh_A03G1988	224.783	-1.34595	0.382494	-3.51889	0.000433362	0.0179492
Gh_D09G1432	681.105	-1.00258	0.284635	-3.52233	0.000427766	0.0178092
Gh_D11G1967	306.772	-1.04335	0.295868	-3.52639	0.000421266	0.0176759
Gh_D12G0523	47.3221	-1.25621	0.356016	-3.52851	0.000417899	0.0175806
Gh_A01G0419	759.073	1.03984	0.294545	3.53031	0.000415071	0.0175535
Gh_D12G2524	187.83	-1.1402	0.32263	-3.53407	0.000409216	0.0173975
Gh_D02G2268	30.6332	1.44243	0.407543	3.53933	0.000401141	0.0171449
Gh_A12G0164	153.67	1.25534	0.354627	3.53988	0.000400302	0.0171242
Gh_D05G3719	73.0051	-1.68115	0.47457	-3.54248	0.000396382	0.0170321
Gh_D13G2154	50.0095	-1.89876	0.535854	-3.54343	0.000394957	0.0170315
Gh_A09G0075	108.852	-1.34628	0.379664	-3.54597	0.000391169	0.0169397
Gh_D05G3929	699.492	1.56892	0.44186	3.55073	0.000384167	0.016773
Gh_A04G0483	98.0302	-1.29559	0.364839	-3.55112	0.000383601	0.0167668
Gh_A12G2714	270.675	-1.69829	0.47768	-3.55528	0.000377578	0.0165787
Gh_A05G0030	52.3423	-1.88796	0.528957	-3.5692	0.00035807	0.0160436
Gh_D12G1981	48.2665	1.00952	0.282767	3.57016	0.000356761	0.0159998
Gh_D02G2012	51.4825	-1.08057	0.302506	-3.57205	0.000354194	0.0159291
Gh_D12G0977	26.732	-1.90908	0.5343	-3.57306	0.000352839	0.015883
Gh_A01G1529	110.79	-1.70546	0.47519	-3.58901	0.000331936	0.0152264
Gh_A12G0442	57.8925	-1.2313	0.343048	-3.5893	0.00033157	0.0152241
Gh_A09G1222	22.4373	-1.51635	0.422156	-3.59191	0.000328261	0.0150866
Gh_D09G1865	52.8519	1.05259	0.292728	3.5958	0.000323399	0.0149343
Gh_A12G1223	32.9389	1.22398	0.339818	3.60187	0.00031593	0.0146596
Gh_A13G0590	396.56	-1.08008	0.29965	-3.60448	0.000312783	0.0145815
Gh_Sca005537G04	748.6	1.27912	0.354744	3.60576	0.000311243	0.0145401
Gh_A13G0614	115.423	-1.26683	0.349671	-3.62291	0.000291307	0.0139189
Gh_D03G0092	53.5141	-1.17373	0.322906	-3.63488	0.000278106	0.0135023
Gh_A08G0449	152.547	1.46156	0.40129	3.64216	0.000270355	0.0132058
Gh_A03G1432	2628.1	1.19834	0.328234	3.65087	0.000261358	0.0128625
Gh_D06G0176	107.204	1.2087	0.329813	3.66479	0.000247544	0.0124187
Gh_A05G2532	53.34	-1.46971	0.401015	-3.66498	0.000247358	0.0124187
Gh_Sca017674G01	21.7885	1.5687	0.424152	3.69843	0.000216939	0.0113929
Gh_A10G0065	100.954	1.37979	0.372739	3.70176	0.000214106	0.0113267
Gh_D12G2282	159.895	-1.87976	0.507828	-3.70158	0.000214265	0.0113267
Gh_A11G2997	213.483	-1.34852	0.363039	-3.71452	0.000203587	0.0110159
Gh_D07G1517	214.271	1.01444	0.272968	3.71632	0.000202145	0.0109643
Gh_D10G0069	109.343	1.30457	0.3502	3.72522	0.000195143	0.0107276
Gh_A06G1912	127.013	1.15736	0.310157	3.73153	0.000190324	0.010583
Gh_D12G1704	110.195	-1.24547	0.332277	-3.74828	0.000178054	0.0101065
Gh_D11G1494	23.5493	1.47323	0.392709	3.75145	0.000175816	0.0100278
Gh_A02G0788	1640.74	1.46265	0.389974	3.75064	0.000176382	0.0100278
Gh_D01G0480	88.7037	-1.53431	0.408719	-3.75395	0.000174068	0.0100278
Gh_A11G1874	44.0555	-1.34841	0.358328	-3.76308	0.000167835	0.00978416
Gh_D12G0061	110.556	-1.21522	0.322772	-3.76497	0.00016657	0.00975763
Gh_D09G1782	4373.39	-1.1826	0.312788	-3.78085	0.000156295	0.00934881
Gh_D07G1945	4529.98	1.08171	0.285447	3.78953	0.000150932	0.00916445
Gh_D01G1739	1238.67	1.23434	0.324295	3.80622	0.000141108	0.00872174
Gh_D10G1619	22.1602	-1.54792	0.405983	-3.81277	0.000137419	0.0085375
Gh_A01G1684	763.501	-1.07059	0.280681	-3.81424	0.0001366	0.00851959
Gh_D01G0520	226.19	-1.98554	0.519055	-3.8253	0.000130613	0.00825897
Gh_A08G0957	450.726	-1.38541	0.361112	-3.8365	0.000124799	0.00806451
Gh_D01G1778	412.817	-1.16589	0.303672	-3.83931	0.000123378	0.00799488
Gh_A07G1590	137.077	1.02048	0.264797	3.85382	0.000116291	0.00772247
Gh_D12G2247	34.6086	-1.90464	0.493203	-3.86177	0.000112567	0.00753046
Gh_A08G1805	236.087	1.18944	0.30743	3.86898	0.000109293	0.00736939
Gh_A05G0511	110.047	-1.41199	0.36486	-3.86996	0.000108854	0.00735005
Gh_D04G2022	401.147	-1.23699	0.319273	-3.87439	0.000106893	0.007242
Gh_A12G0999	80.0847	1.07951	0.278425	3.87719	0.000105668	0.00718527
Gh_D02G2331	114.304	1.06145	0.273258	3.88445	0.000102564	0.00705377
Gh_D05G2837	161.332	-1.35939	0.349891	-3.88517	0.000102257	0.0070427
Gh_D12G2022	48.4275	-1.37867	0.353708	-3.89775	9.71e-05	0.00677392
Gh_A09G0410	232.619	-1.08245	0.277161	-3.9055	9.4e-05	0.00662767
Gh_A10G1858	217.318	1.15066	0.294256	3.9104	9.21e-05	0.00655222
Gh_A13G0231	621.85	1.37428	0.351248	3.91255	9.13e-05	0.00651322
Gh_D05G3625	57.9149	-1.63995	0.418515	-3.9185	8.91e-05	0.00641145
Gh_D09G0167	115.943	-1.44307	0.367804	-3.92347	8.73e-05	0.00631821
Gh_D03G0554	102.127	-1.41633	0.360667	-3.92697	8.6e-05	0.00628708
Gh_A09G0128	77.583	1.34489	0.341658	3.93637	8.27e-05	0.00612613
Gh_A01G0981	396.435	1.29339	0.327349	3.95109	7.78e-05	0.00587871
Gh_D10G1860	36.3401	1.79571	0.454243	3.95318	7.71e-05	0.00584941
Gh_D10G1761	62.2881	-1.3612	0.339465	-4.00985	6.08e-05	0.00494792
Gh_D08G1701	296.29	-1.45632	0.362989	-4.01202	6.02e-05	0.00492604
Gh_D13G1471	220.305	1.27326	0.316611	4.02152	5.78e-05	0.00476545
Gh_D05G3279	45.6744	-2.16924	0.538354	-4.02938	5.59e-05	0.0046485
Gh_A04G0579	126.266	-1.19689	0.296767	-4.03309	5.5e-05	0.00459949
Gh_A01G0096	317.082	-1.00725	0.249566	-4.03603	5.44e-05	0.00455815
Gh_D03G1251	117.953	-1.02976	0.255092	-4.0368	5.42e-05	0.0045511
Gh_A10G2145	148	-1.46448	0.362479	-4.04017	5.34e-05	0.00450182
Gh_A09G2368	3278.23	-1.6215	0.400137	-4.05238	5.07e-05	0.00436293
Gh_D11G1285	210.791	1.18121	0.291202	4.05633	4.98e-05	0.00433023
Gh_D10G1468	50.7814	1.54585	0.380342	4.06438	4.82e-05	0.00425243
Gh_A04G0209	263.016	-1.25539	0.308338	-4.07146	4.67e-05	0.00416273
Gh_Sca005978G01	326.671	-1.19179	0.292134	-4.07961	4.51e-05	0.0040727
Gh_A13G1728	627.363	-1.12968	0.276321	-4.08829	4.35e-05	0.0039604
Gh_A02G0379	330.8	1.21876	0.297793	4.09264	4.26e-05	0.00393153
Gh_A10G0098	400.715	-1.21066	0.294921	-4.10503	4.04e-05	0.00376657
[truncated: 128 more rows]
