# Supplementary material
Source: Preprints.org preprint supplement (doi:10.20944/preprints201908.0280.v1)
Supplement: Supplementary file 2 [file Supplemental Table S2.xlsx]

## Sheet: up
#Term	Database	ID	Input number	Background number	P-Value	Corrected P-Value
Plant-pathogen interaction	KEGG PATHWAY	ath04626	68	167	4.06271e-06	6.59905e-05
alpha-Linolenic acid metabolism	KEGG PATHWAY	ath00592	25	36	8.84244e-06	0.000132604
Thiamine metabolism	KEGG PATHWAY	ath00730	11	11	0.000388519	0.00417942
Pyrimidine metabolism	KEGG PATHWAY	ath00240	42	116	0.00168997	0.015389
Plant hormone signal transduction	KEGG PATHWAY	ath04075	76	271	0.0112015	0.0674433
Biosynthesis of secondary metabolites	KEGG PATHWAY	ath01110	258	1076	0.0137049	0.0795652
2-Oxocarboxylic acid metabolism	KEGG PATHWAY	ath01210	26	74	0.0155494	0.0880018
Glutathione metabolism	KEGG PATHWAY	ath00480	31	93	0.0156463	0.0882755
Homologous recombination	KEGG PATHWAY	ath03440	21	56	0.0164634	0.0919767
Protein export	KEGG PATHWAY	ath03060	20	53	0.0180281	0.0955083
Biosynthesis of amino acids	KEGG PATHWAY	ath01230	70	255	0.0206313	0.107113
Vitamin B6 metabolism	KEGG PATHWAY	ath00750	8	14	0.0237793	0.118427
Galactose metabolism	KEGG PATHWAY	ath00052	20	55	0.024001	0.11909
Protein processing in endoplasmic reticulum	KEGG PATHWAY	ath04141	59	212	0.0256817	0.126495
Phagosome	KEGG PATHWAY	ath04145	27	86	0.039134	0.174246
Valine, leucine and isoleucine biosynthesis	KEGG PATHWAY	ath00290	10	23	0.0433932	0.185432
Purine metabolism	KEGG PATHWAY	ath00230	44	158	0.0477875	0.201016

## Sheet: down
#Term	Database	ID	Input number	Background number	P-Value	Corrected P-Value
Metabolic pathways	KEGG PATHWAY	ath01100	739	1910	2.6664e-30	1.09469e-28
Biosynthesis of secondary metabolites	KEGG PATHWAY	ath01110	467	1076	4.69112e-27	1.57892e-25
Plant hormone signal transduction	KEGG PATHWAY	ath04075	160	271	1.43105e-18	3.49437e-17
Photosynthesis	KEGG PATHWAY	ath00195	64	77	1.11055e-12	1.79612e-11
Carbon fixation in photosynthetic organisms	KEGG PATHWAY	ath00710	50	69	7.95505e-09	1.00434e-07
Carbon metabolism	KEGG PATHWAY	ath01200	118	262	1.65637e-08	2.02891e-07
Stilbenoid, diarylheptanoid and gingerol biosynthesis	KEGG PATHWAY	ath00945	37	46	1.08238e-07	1.22911e-06
Galactose metabolism	KEGG PATHWAY	ath00052	40	55	2.23549e-07	2.42784e-06
Starch and sucrose metabolism	KEGG PATHWAY	ath00500	93	202	2.41484e-07	2.5829e-06
Glyoxylate and dicarboxylate metabolism	KEGG PATHWAY	ath00630	44	74	3.15193e-06	2.83067e-05
Zeatin biosynthesis	KEGG PATHWAY	ath00908	22	23	6.38261e-06	5.51978e-05
Sesquiterpenoid and triterpenoid biosynthesis	KEGG PATHWAY	ath00909	21	23	1.6545e-05	0.00013236
Phenylalanine metabolism	KEGG PATHWAY	ath00360	29	42	1.99437e-05	0.000158532
Phenylpropanoid biosynthesis	KEGG PATHWAY	ath00940	66	157	0.000108694	0.000746474
Glycolysis / Gluconeogenesis	KEGG PATHWAY	ath00010	53	117	0.000116699	0.000798513
Tryptophan metabolism	KEGG PATHWAY	ath00380	27	46	0.000276885	0.00176225
Ascorbate and aldarate metabolism	KEGG PATHWAY	ath00053	25	41	0.00030044	0.00189602
Glycine, serine and threonine metabolism	KEGG PATHWAY	ath00260	36	72	0.000332842	0.00208641
Pentose phosphate pathway	KEGG PATHWAY	ath00030	31	58	0.000353823	0.00219947
Porphyrin and chlorophyll metabolism	KEGG PATHWAY	ath00860	27	48	0.00045728	0.00278695
Limonene and pinene degradation	KEGG PATHWAY	ath00903	25	44	0.000655147	0.00383641
Cysteine and methionine metabolism	KEGG PATHWAY	ath00270	46	112	0.00159729	0.00856167
Glucosinolate biosynthesis	KEGG PATHWAY	ath00966	14	19	0.00179429	0.00938861
Glycerolipid metabolism	KEGG PATHWAY	ath00561	26	53	0.00256998	0.0128361
Nicotinate and nicotinamide metabolism	KEGG PATHWAY	ath00760	12	16	0.00340048	0.0165204
Arginine and proline metabolism	KEGG PATHWAY	ath00330	25	53	0.00455329	0.0215603
Brassinosteroid biosynthesis	KEGG PATHWAY	ath00905	8	8	0.00529878	0.0243796
Fructose and mannose metabolism	KEGG PATHWAY	ath00051	28	64	0.00624433	0.0281409
Ubiquinone and other terpenoid-quinone biosynthesis	KEGG PATHWAY	ath00130	18	35	0.00772858	0.0339694
Peroxisome	KEGG PATHWAY	ath04146	33	87	0.0162899	0.0623106
Nitrogen metabolism	KEGG PATHWAY	ath00910	19	42	0.0169794	0.0644665
Pentose and glucuronate interconversions	KEGG PATHWAY	ath00040	31	81	0.0177437	0.0666907
Diterpenoid biosynthesis	KEGG PATHWAY	ath00904	12	22	0.0198563	0.0735213
Alanine, aspartate and glutamate metabolism	KEGG PATHWAY	ath00250	20	48	0.0271507	0.0936611
Fatty acid metabolism	KEGG PATHWAY	ath01212	25	67	0.0379797	0.124249
Sulfur metabolism	KEGG PATHWAY	ath00920	17	41	0.0407996	0.132892
Steroid biosynthesis	KEGG PATHWAY	ath00100	15	35	0.0435412	0.138797
Valine, leucine and isoleucine degradation	KEGG PATHWAY	ath00280	19	48	0.0437141	0.139229
Vitamin B6 metabolism	KEGG PATHWAY	ath00750	8	14	0.0447113	0.141921
