# Supplementary material
Source: Preprints.org preprint supplement (doi:10.20944/preprints201908.0280.v1)
Supplement: Supplementary file 3 [file Supplemental Table S3.xlsx]

## Sheet: 10min
	baseMean	log2FoldChange	lfcSE	stat	pvalue	padj
Gh_D12G1185	2892.24	-6.40357	0.174308	-36.7372	1.86163e-295	1.10814e-290
Gh_D03G1125	11704.5	5.57845	0.159731	34.924	3.21402e-267	9.56572e-263
Gh_A12G1062	4671.14	-6.74175	0.20212	-33.3551	6.13795e-244	1.21787e-239
Gh_A03G0420	12421.2	6.18812	0.185652	33.3319	1.33465e-243	1.98612e-239
Gh_A01G0581	11189	4.33844	0.132379	32.7729	1.43462e-235	1.70792e-231
Gh_A11G0926	1332.03	-6.50905	0.200496	-32.4647	3.35748e-231	3.3309e-227
Gh_A11G1370	1358.3	4.24979	0.14932	28.4609	3.57665e-178	3.04143e-174
Gh_A12G0561	576.587	-3.99493	0.146558	-27.2584	1.32249e-163	9.84017e-160
Gh_D06G1179	842.12	3.51697	0.129299	27.2003	6.43502e-163	4.25605e-159
Gh_D04G0616	1541.31	-5.65586	0.208042	-27.1862	9.45653e-163	5.629e-159
Gh_D11G1518	1607.94	4.12053	0.151898	27.127	4.72984e-162	2.55949e-158
Gh_A03G0405	9960	5.34906	0.20104	26.6069	5.64466e-156	2.79999e-152
Gh_D11G1068	1325.03	-4.6284	0.174773	-26.4823	1.54821e-154	7.08902e-151
Gh_A08G1363	716.009	-4.1999	0.159025	-26.4103	1.04306e-153	4.43486e-150
Gh_A01G0859	485.749	-4.62886	0.175971	-26.3047	1.69358e-152	6.7207e-149
Gh_A12G1061	2787.43	-6.29574	0.242447	-25.9675	1.15232e-148	4.28701e-145
Gh_A11G1640	354.372	-4.3232	0.170817	-25.309	2.54482e-141	8.91062e-138
Gh_D13G0536	778.142	-4.96291	0.196508	-25.2555	9.86005e-141	3.26066e-137
Gh_A10G1536	2247.15	4.04714	0.16161	25.0427	2.09889e-138	6.57559e-135
Gh_D05G3484	8049.5	-3.8545	0.157631	-24.4526	4.71884e-132	1.40444e-128
Gh_D05G2696	380.412	-7.49879	0.3074	-24.3943	1.96703e-131	5.57559e-128
Gh_D10G2568	1641.26	4.00824	0.165014	24.2903	2.4815e-130	6.71416e-127
Gh_A02G0063	1443.8	2.68774	0.114135	23.5488	1.29024e-122	3.3392e-119
Gh_D03G1135	7303.45	5.11859	0.218262	23.4516	1.27202e-121	3.15487e-118
Gh_D09G2205	1705.71	-5.81611	0.249963	-23.2678	9.38598e-120	2.2348e-116
Gh_A09G2004	2072.91	-6.0242	0.25992	-23.1772	7.74136e-119	1.77232e-115
Gh_D10G0370	1157.86	4.21783	0.182039	23.1699	9.16248e-119	2.01999e-115
Gh_A02G0754	1584.89	-3.75505	0.163994	-22.8974	4.92792e-116	1.04762e-112
Gh_A01G0521	274.383	-7.28845	0.320716	-22.7256	2.50394e-114	5.13956e-111
Gh_D05G2235	1455.45	-3.8516	0.171227	-22.4941	4.74481e-112	9.41449e-109
Gh_D07G0293	15088	-2.32931	0.103736	-22.4541	1.16592e-111	2.23876e-108
Gh_A07G1493	571.866	3.09418	0.138741	22.3018	3.54633e-110	6.59672e-107
Gh_D01G0592	17887.5	4.64278	0.208662	22.2502	1.12307e-109	2.02578e-106
Gh_D05G1029	711.507	4.70442	0.211636	22.2288	1.80893e-109	3.16695e-106
Gh_A08G0192	2178.41	-3.76917	0.170119	-22.1561	9.10686e-109	1.54882e-105
Gh_D12G1841	862.173	-4.56287	0.206557	-22.0901	3.93681e-108	6.50941e-105
Gh_D08G0269	2451.01	-3.60442	0.163662	-22.0236	1.7103e-107	2.75151e-104
Gh_D04G0529	974.412	-3.34948	0.152485	-21.966	6.09353e-107	9.54519e-104
Gh_D02G0075	2402.84	3.47082	0.158662	21.8756	4.43771e-106	6.77319e-103
Gh_A05G0944	527.784	4.60245	0.210941	21.8186	1.54399e-105	2.29765e-102
Gh_A07G0806	878.843	3.27931	0.150912	21.73	1.06727e-104	1.5495e-101
Gh_A11G2287	625.597	-4.04586	0.187901	-21.5318	7.83997e-103	1.11113e-99
Gh_A01G0519	2056.12	-3.93797	0.183143	-21.5021	1.48665e-102	2.05798e-99
Gh_D09G1782	4373.39	-6.72722	0.313373	-21.4671	3.15888e-102	4.27346e-99
Gh_A10G0362	2189.07	4.03906	0.189078	21.3619	3.02507e-101	4.00149e-98
Gh_D07G2420	1530.64	-2.04369	0.0981242	-20.8276	2.43543e-96	3.1515e-93
Gh_A12G0121	607.864	-4.45127	0.214421	-20.7595	1.00661e-95	1.27486e-92
Gh_A10G2003	1888.82	-4.68652	0.225825	-20.7528	1.15586e-95	1.43339e-92
Gh_A08G0609	2661.22	-3.42123	0.16491	-20.746	1.33186e-95	1.61794e-92
Gh_D04G1832	2958.69	-2.59645	0.12705	-20.4364	7.93209e-93	9.44315e-90
Gh_D12G1184	2027.03	-6.41769	0.315037	-20.3712	3.00977e-92	3.51287e-89
Gh_A03G0543	1887.77	1.61027	0.0790558	20.3687	3.16821e-92	3.62669e-89
Gh_D04G0643	327.112	-6.00691	0.295213	-20.3477	4.86419e-92	5.46303e-89
Gh_A07G1725	10387.5	-3.49648	0.172981	-20.2131	7.51555e-91	8.2845e-88
Gh_A07G0713	2208.1	-2.24054	0.111689	-20.0606	1.63094e-89	1.76512e-86
Gh_A08G1808	8925.14	-2.21933	0.11094	-20.0048	5.00157e-89	5.3164e-86
Gh_A06G0990	693.316	3.22135	0.161302	19.9709	9.85695e-89	1.02936e-85
Gh_D08G2193	1105.55	3.34873	0.168135	19.9169	2.90393e-88	2.98028e-85
Gh_A03G1426	569.169	-4.07088	0.207269	-19.6406	6.95804e-86	7.01996e-83
Gh_D06G0772	1829.69	-3.65686	0.18751	-19.5022	1.05089e-84	1.04257e-81
Gh_A02G1385	1116.55	-2.22312	0.114558	-19.406	6.87001e-84	6.70389e-81
Gh_D02G0797	1792.6	-3.68172	0.190801	-19.2961	5.79048e-83	5.55933e-80
Gh_A05G3112	624.074	-2.55235	0.132808	-19.2184	2.59888e-82	2.45553e-79
Gh_D09G0277	1039.59	4.1479	0.215855	19.2162	2.7105e-82	2.52098e-79
Gh_A09G2314	2719.8	-4.2855	0.22409	-19.124	1.59324e-81	1.45904e-78
Gh_A02G0753	691.708	-2.26104	0.118665	-19.054	6.09203e-81	5.49437e-78
Gh_A10G1850	1999.91	-1.60115	0.0841668	-19.0236	1.08802e-80	9.66633e-78
Gh_D04G0269	10240.4	-2.29911	0.121802	-18.8757	1.80614e-79	1.58104e-76
Gh_D07G0867	736.425	3.45046	0.183643	18.789	9.28988e-79	8.01421e-76
Gh_A04G0209	263.016	-5.75748	0.307502	-18.7234	3.19192e-78	2.71428e-75
Gh_D09G2008	3576.15	-3.14542	0.168178	-18.7029	4.68678e-78	3.92931e-75
Gh_A10G1039	6638.03	-2.3213	0.124171	-18.6943	5.50409e-78	4.55043e-75
Gh_Sca005798G01	2566.82	2.44995	0.131562	18.622	2.13016e-77	1.73696e-74
Gh_A13G0253	766.201	2.4106	0.129546	18.6081	2.75989e-77	2.22003e-74
Gh_A08G1440	686.58	-2.00338	0.107955	-18.5576	7.08536e-77	5.62342e-74
Gh_D10G2162	389.548	-3.37867	0.182147	-18.5492	8.28126e-77	6.48608e-74
Gh_D08G0875	3668.89	-3.63067	0.195963	-18.5273	1.24351e-76	9.61294e-74
Gh_D01G0534	209.329	-6.27838	0.339495	-18.4933	2.33878e-76	1.78482e-73
Gh_D13G2047	11166.2	-1.95708	0.105868	-18.4859	2.68043e-76	2.01965e-73
Gh_A11G0920	843.039	-6.39287	0.3459	-18.4818	2.89169e-76	2.1516e-73
Gh_D11G1666	5282.42	-2.70401	0.146339	-18.4778	3.11716e-76	2.29073e-73
Gh_D04G1509	168.878	-6.54745	0.354615	-18.4635	4.05824e-76	2.94593e-73
Gh_A07G1131	1340.23	-3.82266	0.207389	-18.4323	7.22898e-76	5.1844e-73
Gh_D07G0661	21391.9	-3.95589	0.214983	-18.4009	1.29149e-75	9.15188e-73
Gh_A05G3730	7297.88	-3.67852	0.200608	-18.3368	4.20871e-75	2.94733e-72
Gh_D09G0139	2262.93	-2.67475	0.146074	-18.3109	6.76808e-75	4.68453e-72
Gh_A12G0862	675.666	-2.5772	0.140857	-18.2966	8.81081e-75	6.02832e-72
Gh_A07G2025	1237.35	3.06319	0.167472	18.2908	9.79262e-75	6.62393e-72
Gh_D12G0554	1060.59	-4.23253	0.232255	-18.2236	3.35207e-74	2.24193e-71
Gh_A02G0721	1852.18	-2.24044	0.123073	-18.2041	4.78551e-74	3.16508e-71
Gh_A01G1348	689.921	-2.8736	0.158173	-18.1674	9.34661e-74	6.11381e-71
Gh_D10G0655	1732.11	-1.96844	0.108369	-18.1642	9.9226e-74	6.42003e-71
Gh_D07G1645	255.032	3.59891	0.198294	18.1494	1.29908e-73	8.31478e-71
Gh_Sca004987G01	6465.52	-3.59781	0.198971	-18.0821	4.40912e-73	2.79205e-70
Gh_D03G0339	670.796	-2.38641	0.132205	-18.0508	7.77233e-73	4.86998e-70
Gh_D12G2194	1933.59	-2.46989	0.136936	-18.0368	1.00229e-72	6.21472e-70
Gh_A09G1956	683.795	-2.57022	0.142625	-18.0207	1.33938e-72	8.21925e-70
Gh_D12G1886	1582.76	-2.73295	0.151671	-18.0189	1.38347e-72	8.40317e-70
Gh_Sca006871G01	1685.79	-2.11879	0.117632	-18.0121	1.56582e-72	9.4147e-70
Gh_A06G0542	2735.08	-3.23621	0.179704	-18.0086	1.66886e-72	9.93387e-70
Gh_A10G0603	3041.71	1.86072	0.103334	18.0069	1.71939e-72	1.01333e-69
Gh_A05G3111	297.588	4.24646	0.237955	17.8457	3.12372e-71	1.82294e-68
Gh_D13G1939	2428.49	-1.77309	0.0993762	-17.8422	3.32263e-71	1.92019e-68
Gh_A05G3720	3370.26	-1.5702	0.0884973	-17.7429	1.95503e-70	1.11897e-67
Gh_D09G2161	1211.03	-2.40242	0.135407	-17.7422	1.97992e-70	1.12243e-67
Gh_D11G3169	5383.01	-2.41739	0.137008	-17.6441	1.12957e-69	6.34319e-67
Gh_A13G0947	3367.41	-3.56524	0.202142	-17.6373	1.27413e-69	7.0881e-67
Gh_D03G0425	5215.9	-1.79003	0.101582	-17.6215	1.68515e-69	9.28784e-67
Gh_D11G3083	779.369	-3.41471	0.194397	-17.5656	4.5158e-69	2.46608e-66
Gh_A11G0628	482.587	-4.34666	0.24779	-17.5417	6.88326e-69	3.72478e-66
Gh_D01G0183	1501.53	-2.64539	0.151038	-17.5148	1.10505e-68	5.92598e-66
Gh_D04G1784	411.799	-4.28075	0.244696	-17.4941	1.58774e-68	8.43842e-66
Gh_A05G3329	11563.3	-1.9397	0.110935	-17.485	1.86513e-68	9.82492e-66
Gh_A01G1562	1924.27	2.31763	0.132649	17.4719	2.34646e-68	1.2252e-65
Gh_A07G0818	4436.58	-3.23913	0.185635	-17.4489	3.51116e-68	1.81741e-65
Gh_A02G1299	549.406	-2.65804	0.152828	-17.3924	9.42223e-68	4.83498e-65
Gh_D08G1734	530.303	-2.22885	0.128816	-17.3027	4.4921e-67	2.2854e-64
Gh_A08G0736	4499.66	-3.96714	0.229867	-17.2585	9.66696e-67	4.87649e-64
Gh_D10G2111	2167.56	-1.41895	0.0822616	-17.2492	1.13445e-66	5.67464e-64
Gh_D08G1658	436.754	-4.73758	0.275783	-17.1786	3.83788e-66	1.90375e-63
Gh_D12G1757	14001.4	-2.62979	0.153573	-17.124	9.83427e-66	4.83789e-63
Gh_D11G1798	238.315	-4.49104	0.262464	-17.1111	1.2268e-65	5.98566e-63
Gh_A08G1099	194.442	-3.55906	0.208079	-17.1044	1.37687e-65	6.66329e-63
Gh_A12G1617	13702.5	-2.86239	0.167641	-17.0746	2.29489e-65	1.10164e-62
Gh_D05G1475	544.219	2.11347	0.124174	17.0201	5.82273e-65	2.76264e-62
Gh_D07G0984	415.939	4.33148	0.254496	17.0198	5.85523e-65	2.76264e-62
Gh_D11G0738	289.584	-3.92786	0.230787	-17.0194	5.89424e-65	2.76264e-62
Gh_A03G1882	2493.82	-2.98107	0.175528	-16.9835	1.0889e-64	5.06381e-62
Gh_A07G0594	16675.4	-4.28986	0.252905	-16.9623	1.56079e-64	7.202e-62
Gh_D09G0053	682.605	-2.45931	0.144995	-16.9614	1.58648e-64	7.26426e-62
Gh_D02G1885	705.472	-4.18452	0.247533	-16.9049	4.1435e-64	1.88276e-61
Gh_D09G1220	1399.71	-1.72837	0.102503	-16.8616	8.61682e-64	3.88573e-61
Gh_D11G0765	5312.46	1.63925	0.0973781	16.8338	1.37887e-63	6.17122e-61
Gh_A09G0062	2063.73	1.27026	0.0759188	16.7318	7.68192e-63	3.41243e-60
Gh_D07G0354	845.02	-2.25008	0.134624	-16.7139	1.03841e-62	4.57862e-60
Gh_A05G3028	959.259	-6.04484	0.362681	-16.6671	2.27297e-62	9.94844e-60
Gh_A05G0572	491.273	-4.51688	0.271385	-16.6438	3.35391e-62	1.45724e-59
Gh_A12G1407	766.144	3.56269	0.214438	16.6141	5.50941e-62	2.37643e-59
Gh_D02G2322	2316.23	-2.48493	0.150663	-16.4932	4.10312e-61	1.75711e-58
Gh_D02G1996	43424.4	-2.64281	0.160426	-16.4737	5.66919e-61	2.41042e-58
Gh_A03G0597	1921.44	1.797	0.109162	16.4618	6.90471e-61	2.91491e-58
Gh_A08G0899	4314.87	-2.21408	0.134645	-16.4439	9.27467e-61	3.88785e-58
Gh_D12G0543	1041.74	-2.58333	0.157136	-16.4401	9.8739e-61	4.1101e-58
Gh_D08G1379	299.225	-3.33834	0.203307	-16.4202	1.37089e-60	5.66684e-58
Gh_D11G1003	657.337	-1.81987	0.110859	-16.4161	1.46656e-60	6.02048e-58
Gh_A08G2100	295.673	-2.99065	0.182445	-16.3921	2.17887e-60	8.88337e-58
Gh_A05G2996	519.361	-3.8424	0.234929	-16.3556	3.96993e-60	1.60755e-57
Gh_A08G2395	3172.75	-4.20143	0.256991	-16.3485	4.45618e-60	1.79226e-57
Gh_D03G1822	852.61	-3.27047	0.200096	-16.3444	4.76484e-60	1.90354e-57
Gh_D06G0610	1763.45	-3.08817	0.189151	-16.3265	6.39715e-60	2.5386e-57
Gh_A10G2120	235.699	5.8011	0.355407	16.3224	6.83731e-60	2.6953e-57
Gh_D12G0577	224.184	-4.1039	0.252313	-16.2651	1.74628e-59	6.83864e-57
Gh_D12G2092	362.606	2.69149	0.166213	16.193	5.65485e-59	2.20003e-56
Gh_D12G2111	2005.39	-1.62262	0.100232	-16.1887	6.06364e-59	2.34375e-56
Gh_A10G2292	6175.44	-1.53617	0.094949	-16.1789	7.10318e-59	2.72785e-56
Gh_A01G1664	980.691	1.93452	0.119613	16.1732	7.79828e-59	2.97559e-56
Gh_D08G0923	1310.4	-2.104	0.130301	-16.1472	1.1877e-58	4.50305e-56
Gh_A09G1143	18915.6	-2.80127	0.173679	-16.1291	1.59393e-58	6.00497e-56
Gh_D07G1063	580.963	-2.5977	0.161072	-16.1276	1.63316e-58	6.11407e-56
Gh_D07G0878	1912.05	-2.77868	0.172431	-16.1147	2.01048e-58	7.4796e-56
Gh_D07G0746	4757.08	-2.35966	0.146687	-16.0863	3.1809e-58	1.17605e-55
Gh_A06G0969	366.052	-2.37964	0.147979	-16.0809	3.4707e-58	1.27527e-55
Gh_A10G1223	4326.96	-2.82308	0.17563	-16.074	3.8828e-58	1.41794e-55
Gh_A11G2754	643.55	-2.60475	0.16211	-16.0678	4.29024e-58	1.55717e-55
Gh_D10G2532	638.886	-3.09867	0.19352	-16.0121	1.05201e-57	3.79521e-55
Gh_D08G1892	7024.12	-2.27185	0.142001	-15.9988	1.30189e-57	4.66836e-55
Gh_A09G0145	740.569	-2.89382	0.181586	-15.9364	3.54394e-57	1.26319e-54
Gh_D09G0145	4785	2.04212	0.128173	15.9326	3.76279e-57	1.33321e-54
Gh_A13G0590	396.56	-4.82066	0.303028	-15.9083	5.55132e-57	1.95528e-54
Gh_D06G1145	177.805	-2.94842	0.185512	-15.8934	7.04305e-57	2.4661e-54
Gh_D10G2310	1877.2	-4.24408	0.267949	-15.8392	1.67032e-56	5.81438e-54
Gh_A02G0495	756.45	-3.42415	0.216218	-15.8366	1.74035e-56	5.98811e-54
Gh_A05G0516	3602.6	-1.6298	0.102912	-15.8368	1.7339e-56	5.98811e-54
Gh_D03G1717	513.322	-2.97882	0.188221	-15.8262	2.0515e-56	7.01812e-54
Gh_A06G0655	983.262	-2.75002	0.173944	-15.8098	2.66216e-56	9.05515e-54
Gh_D06G0147	329.032	4.70708	0.298729	15.7571	6.1432e-56	2.07769e-53
Gh_D02G0764	1519.53	-2.02156	0.128308	-15.7555	6.29898e-56	2.11834e-53
Gh_A02G1200	2676.47	3.26947	0.207608	15.7483	7.05841e-56	2.3604e-53
Gh_Sca047584G01	373.856	3.66918	0.233241	15.7313	9.23172e-56	3.06993e-53
Gh_D06G2350	2294.95	-4.89975	0.314292	-15.5898	8.54399e-55	2.82545e-52
Gh_D11G2210	921.431	-4.28144	0.274648	-15.5888	8.67298e-55	2.85226e-52
Gh_A05G3496	1215.38	-3.93873	0.253279	-15.5509	1.56825e-54	5.12913e-52
Gh_D12G2121	1661.02	-2.93877	0.189315	-15.5232	2.4176e-54	7.86379e-52
Gh_A01G1701	775.717	-3.00167	0.19391	-15.4797	4.75599e-54	1.53859e-51
Gh_D05G2200	905.492	-2.08399	0.134798	-15.4601	6.45224e-54	2.07605e-51
Gh_D02G1780	864.814	-2.494	0.161756	-15.4183	1.23386e-53	3.94867e-51
Gh_D05G0190	684.324	-3.98371	0.258512	-15.4101	1.39892e-53	4.45298e-51
Gh_A02G1285	4028.44	-1.87233	0.121514	-15.4084	1.43794e-53	4.55284e-51
Gh_D08G2764	3027.04	-2.20133	0.142942	-15.4002	1.63132e-53	5.1378e-51
Gh_A07G0308	903.68	-1.58485	0.103104	-15.3714	2.54677e-53	7.97877e-51
Gh_D11G3395	984.678	-2.11778	0.137787	-15.3699	2.60433e-53	8.11636e-51
Gh_A05G0534	943.407	-1.65469	0.107666	-15.3687	2.65404e-53	8.22821e-51
Gh_A12G0687	1008.92	-2.6491	0.172621	-15.3464	3.74677e-53	1.15558e-50
Gh_D11G3490	414.84	2.28024	0.148707	15.3338	4.54921e-53	1.39583e-50
Gh_A05G0856	268.185	-4.24374	0.277239	-15.3072	6.84863e-53	2.09059e-50
Gh_A07G0668	4686.21	-2.50186	0.163879	-15.2665	1.27894e-52	3.88413e-50
Gh_D09G1081	2351.29	-3.42716	0.224541	-15.2629	1.35051e-52	4.08066e-50
Gh_D10G1271	3227.28	-2.4674	0.161727	-15.2566	1.48771e-52	4.47253e-50
Gh_D12G2528	867.532	-2.14513	0.140728	-15.243	1.83133e-52	5.4779e-50
Gh_D08G1099	4187.75	-2.11159	0.138631	-15.2317	2.17771e-52	6.48141e-50
Gh_D10G1640	7958.62	-1.55239	0.102026	-15.2157	2.78269e-52	8.24079e-50
Gh_D03G1171	190.77	5.25295	0.345576	15.2006	3.50613e-52	1.03318e-49
Gh_D03G0284	1450.99	-1.47438	0.0970415	-15.1933	3.91712e-52	1.1486e-49
Gh_A12G1614	1079.25	-2.22099	0.146233	-15.188	4.24794e-52	1.2395e-49
Gh_A10G0692	2624.51	1.97483	0.13007	15.1828	4.59728e-52	1.33489e-49
Gh_D02G2049	525.567	-6.25411	0.411995	-15.1801	4.7933e-52	1.38506e-49
Gh_D09G2007	116.475	-3.97398	0.262092	-15.1625	6.25942e-52	1.79996e-49
Gh_A03G0281	666.687	-2.79792	0.184716	-15.1471	7.91277e-52	2.26446e-49
Gh_A11G2982	2285.48	-1.51574	0.100073	-15.1464	8.00635e-52	2.28028e-49
Gh_A13G1158	3650.5	-2.27534	0.150521	-15.1164	1.26219e-51	3.57772e-49
Gh_D11G1303	344.234	-3.00222	0.198727	-15.1072	1.45087e-51	4.09303e-49
Gh_D13G1533	6704.81	-3.09632	0.204964	-15.1066	1.46453e-51	4.11207e-49
Gh_A09G1632	308.054	-2.05913	0.136558	-15.0788	2.23436e-51	6.24415e-49
Gh_A09G0153	3119.61	2.23186	0.148343	15.0453	3.70503e-51	1.02708e-48
Gh_D07G0353	1292.11	-2.16375	0.143816	-15.0452	3.70974e-51	1.02708e-48
Gh_A11G0589	9272.33	5.66032	0.37821	14.9661	1.22344e-50	3.37154e-48
Gh_A03G2154	42226.7	-2.55414	0.171417	-14.9001	3.28953e-50	9.02348e-48
Gh_A13G1580	1994.1	-2.08883	0.140304	-14.8879	3.94813e-50	1.07804e-47
Gh_A07G0235	10703.5	-3.13299	0.210448	-14.8873	3.98611e-50	1.08344e-47
Gh_D02G1456	872.861	-2.88355	0.193953	-14.8673	5.37345e-50	1.45389e-47
Gh_D13G1979	5437.18	-1.57674	0.10614	-14.8553	6.42666e-50	1.73098e-47
Gh_A04G0218	15100.5	-3.77824	0.254631	-14.8381	8.31015e-50	2.2282e-47
Gh_D05G1190	916.246	3.1442	0.212196	14.8174	1.12995e-49	3.01615e-47
Gh_A05G0128	816.056	-3.42715	0.231498	-14.8042	1.37584e-49	3.65611e-47
Gh_A07G0910	294.566	3.66393	0.247873	14.7815	1.92915e-49	5.10367e-47
Gh_D06G0402	723.723	-2.60054	0.176194	-14.7595	2.67061e-49	7.03399e-47
Gh_D09G1641	707.16	-3.4502	0.234487	-14.7138	5.25465e-49	1.3779e-46
Gh_A05G0964	1758.61	-1.16334	0.0790822	-14.7106	5.5151e-49	1.43985e-46
Gh_A06G1442	186.118	4.27013	0.290537	14.6974	6.70319e-49	1.74239e-46
Gh_D08G1934	582.523	2.02542	0.137841	14.6939	7.05004e-49	1.82458e-46
Gh_D12G1755	739.291	-2.22555	0.151497	-14.6904	7.42629e-49	1.91364e-46
Gh_A05G3766	7978.06	-1.98706	0.135428	-14.6725	9.67568e-49	2.48252e-46
Gh_Sca008309G01	584.596	-2.68257	0.183075	-14.6529	1.29153e-48	3.29951e-46
Gh_D01G0078	1707.7	-2.39159	0.163311	-14.6444	1.46236e-48	3.71997e-46
Gh_D11G3525	817.05	-5.4769	0.374033	-14.6428	1.49727e-48	3.79255e-46
Gh_A09G1073	2687.28	-3.18821	0.21805	-14.6215	2.04872e-48	5.16737e-46
Gh_D08G1733	792.023	-1.66428	0.113839	-14.6196	2.10688e-48	5.29165e-46
Gh_A03G1831	1904.78	-1.6886	0.115535	-14.6155	2.23707e-48	5.59503e-46
Gh_D03G1253	339.442	-5.03655	0.345021	-14.5978	2.9005e-48	7.22395e-46
Gh_A05G1665	1273.91	-2.03163	0.139263	-14.5885	3.32488e-48	8.24639e-46
Gh_A06G1838	510.808	-3.62039	0.248349	-14.5778	3.88718e-48	9.60101e-46
Gh_A04G1173	543.339	-4.03427	0.277018	-14.5632	4.81228e-48	1.18368e-45
Gh_D07G2304	336.914	-3.29426	0.22708	-14.507	1.09323e-47	2.67795e-45
Gh_A09G1635	196.195	-2.71937	0.187506	-14.5029	1.16156e-47	2.83367e-45
Gh_A09G0817	487.486	-3.79682	0.26226	-14.4773	1.68563e-47	4.09539e-45
Gh_A02G1806	488.337	-2.85112	0.197063	-14.4681	1.92735e-47	4.66365e-45
Gh_D04G0855	2650.37	2.21946	0.153752	14.4353	3.10468e-47	7.48204e-45
Gh_A12G0538	1596.83	-3.32924	0.230697	-14.4312	3.29142e-47	7.90008e-45
Gh_A09G1634	1477.33	-1.88634	0.130767	-14.4252	3.59308e-47	8.58947e-45
Gh_D12G0943	676.099	-2.28502	0.158426	-14.4233	3.69176e-47	8.79008e-45
Gh_D05G1853	834.879	-1.94402	0.135064	-14.3933	5.70095e-47	1.35199e-44
Gh_D09G1451	4111.22	-3.1356	0.21787	-14.3921	5.80467e-47	1.37112e-44
Gh_A08G1418	2331.32	-1.51749	0.105584	-14.3723	7.72041e-47	1.81643e-44
Gh_A13G1958	412.012	-1.5013	0.104649	-14.3461	1.12721e-46	2.64162e-44
Gh_A06G1545	920.537	3.97163	0.277316	14.3217	1.60259e-46	3.74096e-44
Gh_D05G0635	3587.52	-1.60286	0.111945	-14.3183	1.68243e-46	3.91198e-44
Gh_D04G0114	664.314	-4.19788	0.293885	-14.2841	2.74977e-46	6.36887e-44
Gh_A13G1234	602.837	-2.75478	0.193087	-14.2671	3.51096e-46	8.10037e-44
Gh_D01G1930	158.109	-4.33804	0.304981	-14.224	6.50437e-46	1.49488e-43
Gh_D08G1926	130.676	3.07073	0.216287	14.1975	9.49582e-46	2.17399e-43
Gh_A11G0166	413.349	-2.55954	0.180643	-14.169	1.42512e-45	3.25019e-43
Gh_A05G0995	1661.78	-2.31789	0.164265	-14.1106	3.26555e-45	7.41916e-43
Gh_D09G1147	12702.6	-2.46664	0.174918	-14.1017	3.70538e-45	8.38642e-43
Gh_D02G0732	372.735	-3.12843	0.221909	-14.0978	3.91659e-45	8.83088e-43
Gh_A01G1504	732.178	-2.36892	0.168093	-14.0929	4.19804e-45	9.42975e-43
Gh_A09G2385	777.514	-2.50991	0.178541	-14.0579	6.88722e-45	1.54121e-42
Gh_D01G0143	221.436	4.99367	0.355462	14.0484	7.88038e-45	1.75685e-42
Gh_A11G2024	1390.27	-2.84639	0.202724	-14.0408	8.77609e-45	1.94924e-42
Gh_A02G1244	602.53	-4.33567	0.309199	-14.0223	1.13864e-44	2.51961e-42
Gh_D01G0031	2236.85	-1.5139	0.108302	-13.9785	2.10836e-44	4.64816e-42
Gh_A09G2368	3278.23	-5.58002	0.399573	-13.9649	2.55135e-44	5.60402e-42
Gh_D05G1113	1904.54	-2.46298	0.176387	-13.9635	2.60432e-44	5.69935e-42
Gh_A10G2089	1188.25	-3.92929	0.281424	-13.9622	2.65184e-44	5.78208e-42
Gh_A07G1181	1471.01	-1.04825	0.0751186	-13.9546	2.94828e-44	6.40497e-42
Gh_A13G1390	1739.51	1.92886	0.138286	13.9484	3.21955e-44	6.96886e-42
Gh_A11G0506	272.462	2.30291	0.165418	13.9218	4.67215e-44	1.00764e-41
Gh_A11G1431	2350.56	-2.09368	0.150691	-13.8939	6.90152e-44	1.48308e-41
Gh_A07G2086	256.322	-3.49519	0.251575	-13.8932	6.96425e-44	1.49118e-41
Gh_A09G2386	317.845	-2.54576	0.183384	-13.8821	8.12973e-44	1.73449e-41
Gh_D12G2691	1076.86	-3.36725	0.243108	-13.8509	1.25682e-43	2.67187e-41
Gh_A09G0057	483.66	-2.72264	0.196625	-13.8469	1.32838e-43	2.81395e-41
Gh_D08G1844	8842.25	-2.31778	0.167455	-13.8412	1.43778e-43	3.03489e-41
Gh_D03G1842	8790.01	-2.1163	0.152955	-13.8361	1.54279e-43	3.24503e-41
Gh_A05G2408	712.359	-4.94256	0.358097	-13.8023	2.46906e-43	5.17503e-41
Gh_A10G1894	409.327	-3.22138	0.233504	-13.7959	2.69947e-43	5.63811e-41
Gh_D07G1231	739.795	-2.40426	0.174468	-13.7805	3.33998e-43	6.95148e-41
Gh_A02G0971	1138.7	-2.77198	0.201329	-13.7684	3.94752e-43	8.18733e-41
Gh_A03G1631	692.902	-6.01369	0.436913	-13.7641	4.1931e-43	8.66647e-41
Gh_D05G2676	3442.03	-1.11366	0.0809253	-13.7616	4.33985e-43	8.93875e-41
Gh_D05G0504	277.732	2.20548	0.16032	13.7568	4.6374e-43	9.51866e-41
Gh_D10G2299	133497	-3.02444	0.220058	-13.7438	5.54691e-43	1.13464e-40
Gh_D03G0439	694.823	-2.95446	0.215174	-13.7306	6.6624e-43	1.35815e-40
Gh_A09G1533	157.616	-2.69855	0.19669	-13.7198	7.72756e-43	1.56991e-40
Gh_D08G0748	464.662	-1.74093	0.126896	-13.7193	7.78127e-43	1.57544e-40
Gh_D06G0035	3071.43	3.14658	0.229812	13.692	1.1341e-42	2.28839e-40
Gh_D11G1530	778.041	-2.41475	0.176393	-13.6895	1.17236e-42	2.3576e-40
Gh_D01G0808	85.5846	-5.84489	0.426993	-13.6885	1.18979e-42	2.38458e-40
Gh_A12G2185	492.61	-2.79554	0.204685	-13.6578	1.81435e-42	3.62413e-40
Gh_D07G0291	939.234	-2.0479	0.149954	-13.6569	1.83703e-42	3.65717e-40
Gh_A01G1576	592.685	-3.34932	0.245476	-13.6442	2.18692e-42	4.33922e-40
Gh_A07G0824	172.47	-2.594	0.190498	-13.6169	3.17673e-42	6.28223e-40
Gh_D01G0531	20086.9	-3.00439	0.2208	-13.6069	3.64484e-42	7.18407e-40
Gh_A01G0281	479.326	1.99238	0.146626	13.5882	4.7063e-42	9.24562e-40
Gh_A03G2127	1031.67	-2.89168	0.21292	-13.581	5.18947e-42	1.01613e-39
Gh_A05G3064	3008.47	-2.0074	0.147959	-13.5673	6.26009e-42	1.22174e-39
Gh_A05G0725	14216.5	-2.22488	0.164004	-13.566	6.37207e-42	1.23953e-39
Gh_A09G1504	479.991	-2.64422	0.195059	-13.556	7.2966e-42	1.41476e-39
Gh_D13G1732	20911.5	-2.61677	0.193068	-13.5536	7.54429e-42	1.45803e-39
Gh_A12G2280	1105.23	-3.60783	0.266632	-13.5311	1.02446e-41	1.97349e-39
Gh_A05G2394	187.678	-4.11503	0.304706	-13.5049	1.46305e-41	2.80929e-39
Gh_D05G3432	150.158	3.56132	0.264312	13.4739	2.22676e-41	4.262e-39
Gh_A02G0045	47.3705	-5.42164	0.402864	-13.4577	2.77254e-41	5.2896e-39
Gh_D09G1551	251.268	-3.14235	0.233639	-13.4496	3.09546e-41	5.88682e-39
Gh_A11G1386	1062.16	-1.89938	0.141364	-13.4361	3.71681e-41	7.04595e-39
Gh_A05G2022	856.655	-3.16613	0.235789	-13.4278	4.15488e-41	7.85141e-39
Gh_D04G0069	498.124	2.28315	0.170063	13.4254	4.29491e-41	8.09033e-39
Gh_A12G1940	1243.17	-2.96044	0.220544	-13.4234	4.41151e-41	8.28375e-39
Gh_A10G1991	114083	-3.39006	0.252629	-13.4192	4.67009e-41	8.724e-39
Gh_A10G2091	1175.78	-3.1244	0.232833	-13.4191	4.67527e-41	8.724e-39
Gh_A02G0126	615.485	-1.96979	0.147117	-13.3893	6.98324e-41	1.29654e-38
Gh_D11G0176	343.054	-2.60675	0.19469	-13.3892	6.99185e-41	1.29654e-38
Gh_A06G0675	369.305	-3.5565	0.265671	-13.3868	7.21915e-41	1.33453e-38
Gh_A13G1410	644.052	-1.75548	0.131187	-13.3815	7.75623e-41	1.42938e-38
Gh_D10G1302	2342.23	-1.27226	0.0952434	-13.358	1.06381e-40	1.95442e-38
Gh_A11G0317	1197.65	-1.70829	0.127928	-13.3535	1.13003e-40	2.06969e-38
Gh_D13G0082	218.443	-2.56659	0.192591	-13.3266	1.62068e-40	2.95922e-38
Gh_A06G1466	59949.1	-2.02088	0.151944	-13.3002	2.30822e-40	4.20174e-38
Gh_D12G0059	1034.96	-1.81609	0.136793	-13.2762	3.18066e-40	5.77222e-38
Gh_A12G0278	475.213	-2.11042	0.159033	-13.2703	3.4407e-40	6.22516e-38
Gh_A07G0233	882.285	-2.04516	0.154139	-13.2683	3.53656e-40	6.3792e-38
Gh_A13G0203	572.765	-1.59512	0.120241	-13.266	3.64401e-40	6.55317e-38
Gh_A05G1818	974.554	-1.66214	0.125639	-13.2294	5.93292e-40	1.06373e-37
Gh_D08G2762	1225.65	-2.65094	0.200514	-13.2207	6.66284e-40	1.19101e-37
Gh_D02G1653	7254.54	-1.82498	0.138106	-13.2143	7.25183e-40	1.29241e-37
Gh_D09G0655	2230.05	-1.79883	0.1363	-13.1976	9.05374e-40	1.60873e-37
Gh_D08G1846	142.393	-4.04349	0.306929	-13.174	1.23823e-39	2.19362e-37
Gh_D07G2410	470.375	-2.81685	0.213888	-13.1698	1.30993e-39	2.31376e-37
Gh_A13G1697	8368.6	-1.78291	0.135424	-13.1654	1.38784e-39	2.44412e-37
Gh_A07G0193	1579.34	2.02471	0.153953	13.1515	1.66932e-39	2.93115e-37
Gh_A06G1853	376.458	4.35217	0.331089	13.145	1.81695e-39	3.181e-37
Gh_D11G2299	2456.43	-1.46955	0.111848	-13.1388	1.9721e-39	3.4425e-37
Gh_A03G0601	259.924	2.08804	0.159137	13.121	2.49584e-39	4.34401e-37
Gh_A11G0940	435.6	2.00832	0.153217	13.1077	2.97516e-39	5.16315e-37
Gh_D05G0228	193.886	3.35621	0.25617	13.1015	3.22846e-39	5.58645e-37
Gh_A01G0139	1241.74	-2.54305	0.19476	-13.0574	5.76806e-39	9.95199e-37
Gh_A08G1336	13612.7	-1.19912	0.0918763	-13.0515	6.232e-39	1.07214e-36
Gh_D01G1811	1147.75	2.04073	0.156523	13.0379	7.44428e-39	1.27701e-36
Gh_D08G0702	4886.97	-2.8181	0.216224	-13.0333	7.91483e-39	1.35382e-36
Gh_D06G2293	1082.28	-1.88953	0.144985	-13.0326	7.98469e-39	1.36186e-36
Gh_A12G0222	162.804	-2.12842	0.16355	-13.0139	1.0206e-38	1.73575e-36
Gh_A03G1995	194.703	-3.41623	0.262729	-13.0029	1.17818e-38	1.99803e-36
Gh_A01G1767	2538.99	1.9679	0.15135	13.0023	1.18752e-38	2.00816e-36
Gh_D05G3468	12177.3	-2.70275	0.208183	-12.9826	1.5363e-38	2.59061e-36
Gh_D07G0806	232.163	-2.40086	0.18514	-12.9678	1.86324e-38	3.13303e-36
Gh_Sca004822G01	397.59	-2.73318	0.211326	-12.9335	2.91428e-38	4.88654e-36
Gh_D05G3492	228.095	-4.68571	0.362371	-12.9307	3.02096e-38	5.0512e-36
Gh_D10G0695	1300.91	1.49479	0.11561	12.9296	3.06541e-38	5.11116e-36
Gh_A11G2570	1017.99	-1.95852	0.151783	-12.9034	4.30582e-38	7.15932e-36
Gh_A05G0803	1845.72	1.28411	0.0996589	12.885	5.46569e-38	9.03737e-36
Gh_A10G0688	207.66	3.48785	0.270945	12.8729	6.39498e-38	1.05446e-35
Gh_D01G1828	22830.8	-1.38533	0.10774	-12.8581	7.74689e-38	1.27152e-35
Gh_D09G0024	228.592	1.9403	0.150903	12.8579	7.76095e-38	1.27152e-35
Gh_D12G0138	199.739	-4.20565	0.32709	-12.8578	7.77544e-38	1.27152e-35
Gh_D01G1541	6968.5	2.02608	0.158026	12.8212	1.24782e-37	2.03497e-35
Gh_A03G1059	524.231	4.12264	0.321642	12.8175	1.30927e-37	2.12935e-35
Gh_D10G1779	1751.6	-1.41264	0.110343	-12.8023	1.59257e-37	2.58304e-35
Gh_A05G3718	368.595	-3.77112	0.294774	-12.7933	1.78808e-37	2.89227e-35
Gh_D04G1033	113.923	-3.34526	0.261739	-12.7809	2.09648e-37	3.38193e-35
Gh_A08G1438	476.341	-2.03088	0.158905	-12.7804	2.1086e-37	3.39228e-35
Gh_D09G1514	655.699	-1.99714	0.156321	-12.7758	2.23732e-37	3.58966e-35
Gh_D13G1702	2901.94	1.23336	0.0967945	12.7421	3.45072e-37	5.52161e-35
Gh_A09G1405	1437.66	-4.14869	0.325736	-12.7364	3.71297e-37	5.92532e-35
Gh_D13G1915	216.837	-3.81709	0.299842	-12.7304	4.01012e-37	6.38242e-35
Gh_D05G0860	22264.2	-2.002	0.157389	-12.7201	4.57457e-37	7.26136e-35
Gh_A08G2526	1873.76	-2.46473	0.193867	-12.7135	4.97301e-37	7.87283e-35
Gh_A11G1830	1289.47	-4.08105	0.321102	-12.7095	5.23461e-37	8.26499e-35
Gh_D06G0745	645.033	-2.5064	0.197356	-12.6999	5.92021e-37	9.32276e-35
Gh_D05G3199	2628.37	-1.34933	0.106482	-12.672	8.45609e-37	1.3281e-34
Gh_A05G1305	300.074	2.22464	0.17556	12.6717	8.48612e-37	1.32931e-34
Gh_D11G0371	262.374	-2.00767	0.158513	-12.6656	9.16676e-37	1.43216e-34
Gh_A03G1258	2158.02	-1.37033	0.108574	-12.6212	1.61343e-36	2.51411e-34
Gh_A09G1684	7470.58	-1.10358	0.0875244	-12.6088	1.8882e-36	2.93459e-34
Gh_A11G1828	682.96	-1.41578	0.112288	-12.6085	1.89665e-36	2.94005e-34
Gh_A09G1442	4195.49	-3.18146	0.252376	-12.606	1.95593e-36	3.02407e-34
Gh_D09G1997	3646.32	-1.52523	0.121228	-12.5815	2.66939e-36	4.11647e-34
Gh_A04G0765	2443.84	-1.29494	0.10293	-12.5808	2.69258e-36	4.1415e-34
Gh_A07G0634	1556.46	-1.49089	0.118594	-12.5713	3.03509e-36	4.65628e-34
Gh_A07G0202	1600.31	-2.25093	0.17912	-12.5666	3.22125e-36	4.92918e-34
Gh_D06G2358	106.902	3.83425	0.305734	12.5411	4.44634e-36	6.78636e-34
Gh_D02G2415	217.364	-5.92221	0.473773	-12.5001	7.4559e-36	1.13507e-33
Gh_D05G3887	1502.03	1.10091	0.0881453	12.4897	8.49264e-36	1.2896e-33
Gh_D10G1930	1212.45	2.29723	0.183937	12.4892	8.55124e-36	1.2952e-33
Gh_A01G1324	8344.35	2.52311	0.202029	12.4888	8.59268e-36	1.29817e-33
Gh_A01G1634	21510	-1.4458	0.115795	-12.4859	8.91802e-36	1.34391e-33
Gh_D10G2441	143.663	4.47434	0.358519	12.4801	9.59036e-36	1.44158e-33
Gh_D05G0751	729.99	-2.05898	0.165394	-12.4489	1.41716e-35	2.12484e-33
Gh_A13G1619	2336.34	-1.48317	0.119224	-12.4402	1.58036e-35	2.35766e-33
Gh_D13G1199	3521.94	-2.08873	0.167899	-12.4404	1.5773e-35	2.35766e-33
Gh_A03G0704	2042.33	-1.26419	0.101734	-12.4264	1.87881e-35	2.79591e-33
Gh_A06G0308	1429.91	-1.90309	0.153176	-12.4242	1.93099e-35	2.86639e-33
Gh_A10G2090	1065.76	-3.96786	0.319483	-12.4196	2.0449e-35	3.02792e-33
Gh_A09G1570	403.032	-2.73496	0.220256	-12.4172	2.10867e-35	3.1146e-33
Gh_D03G1835	217.721	-1.97287	0.158915	-12.4147	2.17557e-35	3.20547e-33
Gh_A03G2165	572.584	-1.34852	0.108637	-12.4131	2.21822e-35	3.26024e-33
Gh_D06G1215	1553.47	1.56619	0.126206	12.4098	2.31265e-35	3.39066e-33
Gh_A04G0240	11668.7	-2.36414	0.190547	-12.4071	2.39082e-35	3.49665e-33
Gh_A07G0744	304.02	-2.64681	0.213527	-12.3957	2.75899e-35	4.02522e-33
Gh_D11G3304	1306.66	-2.70631	0.218349	-12.3944	2.8021e-35	4.07812e-33
Gh_A02G0277	2372.4	-1.40008	0.113104	-12.3788	3.40553e-35	4.94425e-33
Gh_D09G2122	465.663	-4.97703	0.402592	-12.3625	4.17201e-35	6.0423e-33
Gh_A05G0318	1083.64	1.65234	0.13387	12.3428	5.32499e-35	7.69345e-33
Gh_A03G1960	8599.32	-1.82196	0.147645	-12.3402	5.50366e-35	7.93234e-33
Gh_D12G2364	669.602	-2.04279	0.165585	-12.3368	5.74095e-35	8.25435e-33
Gh_A10G1648	454.647	-2.39989	0.19473	-12.3242	6.70838e-35	9.62208e-33
Gh_D10G1484	5689	-1.37578	0.111648	-12.3224	6.85857e-35	9.81385e-33
Gh_D05G3825	7955.12	-2.16422	0.175647	-12.3215	6.94159e-35	9.90883e-33
Gh_Sca006530G02	661.116	-1.38725	0.112628	-12.317	7.33594e-35	1.04467e-32
Gh_D03G0876	20444.6	-1.56843	0.127439	-12.3073	8.27024e-35	1.17491e-32
Gh_A12G0193	1225.44	-1.93645	0.157365	-12.3055	8.46542e-35	1.19977e-32
Gh_D09G1728	1036.9	-1.79026	0.145644	-12.2921	9.99311e-35	1.41292e-32
Gh_D09G0362	1487.36	-1.13526	0.0923748	-12.2897	1.02896e-34	1.4514e-32
Gh_D02G1730	745.322	2.05073	0.167007	12.2793	1.16969e-34	1.64601e-32
Gh_D05G3868	457.492	-3.35418	0.273497	-12.264	1.41261e-34	1.98315e-32
Gh_A09G0653	1254.77	-1.73684	0.141626	-12.2636	1.42064e-34	1.98974e-32
Gh_D06G0191	1150.28	-1.94005	0.158271	-12.2578	1.52651e-34	2.133e-32
Gh_A05G3863	1317.26	-2.16351	0.176567	-12.2531	1.61607e-34	2.25284e-32
Gh_D05G1620	1140.18	-1.61562	0.132015	-12.2381	1.94507e-34	2.70515e-32
Gh_D11G0676	4098.12	5.01265	0.409657	12.2362	1.99125e-34	2.76292e-32
Gh_D09G1775	380.022	-2.45185	0.2004	-12.2348	2.02561e-34	2.80405e-32
Gh_D13G0421	285.873	-1.93557	0.158314	-12.2261	2.25429e-34	3.11337e-32
Gh_A09G1434	1482.34	1.46531	0.119918	12.2192	2.45454e-34	3.38209e-32
Gh_A01G0033	70.3182	-4.47763	0.366539	-12.2159	2.55502e-34	3.51242e-32
Gh_D05G0111	1152.06	1.32219	0.108306	12.2079	2.82019e-34	3.86801e-32
Gh_A02G1436	2355.06	-1.2482	0.102291	-12.2024	3.01645e-34	4.12769e-32
Gh_A01G1817	1125.96	1.12881	0.092533	12.1989	3.14859e-34	4.29862e-32
Gh_D09G0271	192.488	3.95523	0.324632	12.1837	3.79575e-34	5.17029e-32
Gh_D10G0059	367.213	3.00499	0.247088	12.1616	4.9788e-34	6.76627e-32
Gh_D03G1747	1757.01	-1.71007	0.140681	-12.1556	5.35475e-34	7.26063e-32
Gh_D12G0877	425.208	-3.3442	0.275214	-12.1513	5.64609e-34	7.63825e-32
Gh_A13G0459	1845.47	-1.48935	0.122744	-12.1338	6.99108e-34	9.43638e-32
Gh_A11G3190	14985.6	-1.75652	0.144798	-12.1309	7.24871e-34	9.76198e-32
Gh_A01G0684	146.664	-2.98335	0.245992	-12.1279	7.51873e-34	1.01028e-31
Gh_A07G0488	8998.35	1.1968	0.0987754	12.1164	8.64574e-34	1.15909e-31
Gh_D03G1279	8907.72	-1.08748	0.0898999	-12.0965	1.10144e-33	1.47333e-31
Gh_D05G1103	1398.3	-1.82404	0.151411	-12.047	2.01258e-33	2.68607e-31
Gh_A05G0054	914.418	1.63859	0.136026	12.0461	2.03263e-33	2.70677e-31
Gh_D10G1185	2425.03	-1.80663	0.149996	-12.0445	2.07354e-33	2.75507e-31
Gh_A05G3047	7902.98	-1.45661	0.121132	-12.025	2.62493e-33	3.47994e-31
Gh_A09G2286	3130.67	-1.6083	0.133848	-12.0158	2.93468e-33	3.88193e-31
Gh_D01G0347	2148.92	-2.08657	0.173778	-12.0071	3.25958e-33	4.30214e-31
Gh_A11G1245	12495.2	-1.5141	0.126135	-12.0038	3.39373e-33	4.46929e-31
Gh_D02G0364	1076.05	-1.67192	0.139405	-11.9932	3.85711e-33	5.06831e-31
Gh_A13G2336	862.206	-1.78803	0.149114	-11.991	3.95895e-33	5.19068e-31
Gh_D11G2302	1686.22	-2.64861	0.221049	-11.982	4.41397e-33	5.77454e-31
Gh_A03G0591	21527.2	-1.37375	0.114663	-11.9808	4.48036e-33	5.84854e-31
Gh_A06G1857	993.146	1.92619	0.160822	11.9771	4.68299e-33	6.09967e-31
Gh_D05G0701	345.321	-3.36079	0.280833	-11.9672	5.27708e-33	6.85847e-31
Gh_A10G1766	306.679	-2.47411	0.207086	-11.9472	6.71206e-33	8.70447e-31
Gh_D01G1920	250.138	-2.63219	0.220971	-11.9119	1.02562e-32	1.32718e-30
Gh_D10G2361	1986.75	-2.85852	0.240572	-11.8822	1.46494e-32	1.89155e-30
Gh_D01G1772	652.846	-1.38646	0.116809	-11.8695	1.70558e-32	2.19751e-30
Gh_D11G0372	2089.98	-1.3607	0.114708	-11.8623	1.85795e-32	2.38866e-30
Gh_A13G1464	20898.2	-2.66497	0.224906	-11.8492	2.17155e-32	2.78581e-30
Gh_A08G1621	407.662	2.05782	0.173834	11.8379	2.48716e-32	3.18384e-30
Gh_A03G0935	6741.19	1.44957	0.122576	11.8259	2.86876e-32	3.66444e-30
Gh_D06G1722	76.2718	-5.33823	0.451892	-11.8131	3.34187e-32	4.25053e-30
Gh_D02G2192	987.277	-1.88354	0.159531	-11.8067	3.60471e-32	4.57506e-30
Gh_D01G0706	853.13	-1.36823	0.115934	-11.8018	3.81982e-32	4.83776e-30
Gh_D09G0035	3023.39	3.99736	0.338923	11.7943	4.17706e-32	5.27897e-30
Gh_A09G0075	108.852	-4.65202	0.395114	-11.7739	5.32241e-32	6.71222e-30
Gh_D06G0181	1026.37	1.27101	0.107957	11.7733	5.3596e-32	6.74483e-30
Gh_D09G1931	3260.72	-2.4887	0.211618	-11.7604	6.24594e-32	7.84366e-30
Gh_D12G0332	934.605	-1.74814	0.148883	-11.7417	7.78716e-32	9.75854e-30
Gh_A05G1447	1440.45	-1.83832	0.156671	-11.7337	8.5665e-32	1.07126e-29
Gh_A12G1897	1728.32	-1.40024	0.119344	-11.7329	8.64634e-32	1.07898e-29
Gh_D04G1081	19309.4	1.88163	0.160629	11.7142	1.07842e-31	1.34294e-29
Gh_A05G0415	3123.89	-4.16971	0.356062	-11.7106	1.12461e-31	1.39754e-29
Gh_D06G0337	2582.19	-1.97214	0.168468	-11.7063	1.18331e-31	1.46742e-29
Gh_D08G0537	548.721	2.02923	0.173535	11.6935	1.37663e-31	1.70362e-29
Gh_D11G0764	724.945	2.49276	0.213207	11.6917	1.40543e-31	1.73565e-29
Gh_D05G3782	3552.97	1.12776	0.096462	11.6913	1.41253e-31	1.74081e-29
Gh_D04G1954	713.434	2.29067	0.196064	11.6833	1.5515e-31	1.90813e-29
Gh_A03G0546	408.941	-1.68728	0.144438	-11.6817	1.58131e-31	1.94077e-29
Gh_A08G0451	276.645	2.84272	0.243616	11.6689	1.83871e-31	2.25204e-29
Gh_D09G1515	307.429	-2.90443	0.249104	-11.6595	2.05311e-31	2.50947e-29
Gh_A05G2108	67972.8	-1.85522	0.159129	-11.6586	2.0738e-31	2.52957e-29
Gh_A07G1013	327.377	-3.00773	0.258009	-11.6575	2.10146e-31	2.55807e-29
Gh_A01G0782	94.9073	-5.04	0.432764	-11.6461	2.40299e-31	2.91915e-29
Gh_A01G0531	468.915	-2.48789	0.213819	-11.6355	2.71951e-31	3.29692e-29
Gh_D13G1051	3120.84	-3.46695	0.298189	-11.6267	3.01565e-31	3.6485e-29
Gh_A10G0361	230210	-2.483	0.213963	-11.6048	3.8966e-31	4.70476e-29
Gh_D07G2171	638.996	-2.24243	0.193497	-11.589	4.68704e-31	5.6477e-29
Gh_A12G1482	759.732	1.29974	0.112162	11.5881	4.73519e-31	5.69419e-29
Gh_A03G1218	4539.99	-1.75996	0.151913	-11.5853	4.89395e-31	5.86141e-29
Gh_A03G1967	574.989	-1.44276	0.124552	-11.5835	4.99383e-31	5.96903e-29
Gh_A04G0697	148.346	-2.82374	0.24381	-11.5817	5.10179e-31	6.08585e-29
Gh_D03G1859	2227.97	-2.05701	0.177653	-11.5788	5.27663e-31	6.28183e-29
Gh_D09G1535	1053.8	2.19123	0.189416	11.5683	5.96401e-31	7.07186e-29
Gh_D05G0313	2890.16	-1.36316	0.117894	-11.5626	6.37596e-31	7.54531e-29
Gh_A03G1290	897.563	1.69911	0.146973	11.5607	6.51716e-31	7.69711e-29
Gh_D11G1083	747.599	1.91909	0.166005	11.5604	6.53939e-31	7.70807e-29
Gh_A08G1835	485.773	2.02334	0.175076	11.5569	6.81418e-31	8.01608e-29
Gh_A08G1439	618.239	-1.61647	0.139966	-11.549	7.46698e-31	8.7667e-29
Gh_D09G1717	465.01	-1.68525	0.145928	-11.5485	7.51155e-31	8.80168e-29
Gh_D05G3485	1591.12	-1.17993	0.102177	-11.5479	7.56418e-31	8.84593e-29
Gh_D13G0302	2096.87	1.33182	0.115434	11.5375	8.53379e-31	9.96027e-29
Gh_D01G0893	373.211	-1.87065	0.162219	-11.5316	9.13839e-31	1.06243e-28
Gh_A04G1182	303.04	-1.79402	0.155588	-11.5306	9.25332e-31	1.07369e-28
Gh_D07G0368	528.689	-2.07497	0.180002	-11.5275	9.58904e-31	1.11048e-28
Gh_D13G1050	1782.72	-3.45765	0.300119	-11.521	1.03451e-30	1.19572e-28
Gh_D11G0788	955.464	1.32103	0.114891	11.4981	1.34837e-30	1.55546e-28
Gh_D11G3534	3732.37	-1.22395	0.10656	-11.486	1.55096e-30	1.7857e-28
Gh_A01G1029	847.709	-2.09649	0.182642	-11.4787	1.68752e-30	1.93918e-28
Gh_D06G1142	2296.32	-1.61905	0.141291	-11.459	2.11991e-30	2.43136e-28
Gh_D12G2716	602.552	-2.04488	0.178505	-11.4556	2.20522e-30	2.52434e-28
Gh_D13G0093	243.7	-2.2801	0.199052	-11.4548	2.22558e-30	2.54276e-28
Gh_D13G2454	1471.17	-1.20042	0.104928	-11.4404	2.62767e-30	2.9964e-28
Gh_D10G0303	495.383	-2.21571	0.193745	-11.4362	2.75671e-30	3.13754e-28
Gh_A08G0792	2316.99	1.62625	0.142252	11.4322	2.88729e-30	3.27988e-28
Gh_D11G0266	279.938	-2.90036	0.253785	-11.4284	3.01587e-30	3.41942e-28
Gh_A13G0222	19594	-1.96358	0.17187	-11.4248	3.14306e-30	3.55685e-28
Gh_D11G1699	956.721	-1.15653	0.101297	-11.4172	3.43055e-30	3.87483e-28
Gh_D03G0885	1517.48	1.06869	0.0936501	11.4115	3.66153e-30	4.12789e-28
Gh_D12G1827	473.847	1.38473	0.121372	11.409	3.77163e-30	4.24397e-28
Gh_A12G0696	167.549	-2.23957	0.19635	-11.406	3.90118e-30	4.38147e-28
Gh_A09G0832	408.675	-1.4464	0.126924	-11.3958	4.38643e-30	4.91718e-28
Gh_D12G2324	1121.4	-1.38281	0.121401	-11.3905	4.66562e-30	5.22032e-28
Gh_A09G1511	744.549	2.22389	0.195479	11.3766	5.46623e-30	6.10464e-28
Gh_A01G1440	196.715	-3.69639	0.325317	-11.3624	6.43384e-30	7.1718e-28
Gh_D05G1942	110.135	4.00068	0.352339	11.3546	7.03363e-30	7.82573e-28
Gh_Sca009545G01	2759.26	-2.95825	0.260705	-11.3471	7.66315e-30	8.51024e-28
Gh_A11G2019	3776.74	-1.25547	0.110671	-11.3442	7.92612e-30	8.78589e-28
Gh_D10G0568	791.969	2.0848	0.183806	11.3424	8.0939e-30	8.9552e-28
Gh_D04G0405	620.143	-1.13195	0.099805	-11.3416	8.1622e-30	9.01401e-28
Gh_D08G1030	1397.05	-2.34772	0.207161	-11.3328	9.02609e-30	9.94959e-28
Gh_D06G0999	641.344	2.15896	0.19058	11.3284	9.49734e-30	1.04497e-27
Gh_D01G1883	286.803	-3.48219	0.307456	-11.3258	9.77632e-30	1.07368e-27
Gh_A03G0854	1076.35	-1.66004	0.146595	-11.324	9.98197e-30	1.09425e-27
Gh_A04G0217	4579	-2.59359	0.229549	-11.2987	1.33229e-29	1.4578e-27
Gh_D06G1799	58634.2	-1.75796	0.155765	-11.286	1.53957e-29	1.68152e-27
Gh_A06G0058	1820.31	3.20591	0.28423	11.2792	1.66157e-29	1.81145e-27
Gh_A13G0378	302.085	-1.77794	0.157692	-11.2748	1.74784e-29	1.90201e-27
Gh_A01G1972	66393.5	-1.6187	0.143775	-11.2585	2.10238e-29	2.28365e-27
Gh_D06G1538	30614.9	-1.20216	0.106875	-11.2483	2.36216e-29	2.56115e-27
Gh_A09G1502	3070.3	-2.55611	0.227354	-11.2429	2.51036e-29	2.71689e-27
Gh_A03G0173	3571.18	-1.1841	0.105429	-11.2313	2.86311e-29	3.09304e-27
Gh_A11G1556	1345.69	1.31334	0.117105	11.2151	3.43823e-29	3.70762e-27
Gh_A12G0562	19516.5	-1.60323	0.143014	-11.2103	3.62791e-29	3.90508e-27
Gh_D11G0584	147.147	2.1677	0.193391	11.2089	3.68786e-29	3.96245e-27
Gh_D05G2486	586.606	-1.66709	0.148791	-11.2043	3.88459e-29	4.16631e-27
Gh_D12G2214	238.177	1.74631	0.155868	11.2037	3.90848e-29	4.18439e-27
Gh_D13G2505	914.052	1.30975	0.116975	11.1968	4.22613e-29	4.51634e-27
Gh_A10G1311	1394.43	-2.18489	0.195205	-11.1928	4.42334e-29	4.71863e-27
Gh_D12G1525	1239.68	2.45237	0.219387	11.1783	5.20772e-29	5.53553e-27
Gh_A10G1895	723.234	-1.28892	0.115382	-11.1709	5.66327e-29	6.00902e-27
Gh_D10G2292	307.553	-2.60557	0.233446	-11.1613	6.3035e-29	6.67644e-27
Gh_D11G2278	19154	-1.59683	0.143072	-11.161	6.32491e-29	6.68722e-27
Gh_D02G2264	1516.17	-1.74842	0.156704	-11.1575	6.58397e-29	6.94878e-27
Gh_D09G1780	12439.5	-1.30904	0.117405	-11.1498	7.18019e-29	7.56462e-27
Gh_D13G2337	1012.37	-1.28359	0.11516	-11.1462	7.47492e-29	7.86121e-27
Gh_D10G2406	127.849	-2.37947	0.213525	-11.1438	7.67847e-29	8.06104e-27
Gh_D11G3519	460.623	-2.24393	0.201437	-11.1396	8.04824e-29	8.43436e-27
Gh_D06G0784	937.884	-1.34325	0.120628	-11.1354	8.43615e-29	8.82534e-27
Gh_A06G0708	1831.99	1.33037	0.11951	11.1319	8.77508e-29	9.1638e-27
Gh_A09G0276	110.482	3.1475	0.283083	11.1187	1.0179e-28	1.06083e-26
Gh_A10G0594	2800.04	1.60814	0.144636	11.1185	1.01939e-28	1.06083e-26
Gh_D13G0400	579.434	-1.07036	0.0963113	-11.1136	1.07726e-28	1.11909e-26
Gh_D11G1769	675.796	-1.7926	0.161308	-11.1129	1.08585e-28	1.12605e-26
Gh_A11G3238	1489.6	1.41316	0.127181	11.1114	1.10404e-28	1.1427e-26
Gh_D11G0639	698.645	-2.08737	0.187861	-11.1113	1.10574e-28	1.1427e-26
Gh_A12G0473	659.999	-1.21316	0.109185	-11.1111	1.10794e-28	1.14298e-26
Gh_D05G1140	441.607	-1.97236	0.177525	-11.1103	1.11786e-28	1.15122e-26
Gh_D05G3113	229.211	-2.02898	0.182677	-11.1069	1.16109e-28	1.19368e-26
Gh_A11G0142	134.038	-3.33847	0.300595	-11.1062	1.17004e-28	1.20081e-26
Gh_A01G1662	715.768	1.86287	0.168106	11.0815	1.54186e-28	1.57968e-26
Gh_A03G1581	2517.88	-1.21698	0.109852	-11.0784	1.59744e-28	1.63381e-26
Gh_D05G2386	507.634	-1.05735	0.0954484	-11.0777	1.60873e-28	1.64253e-26
Gh_D09G0055	3347.38	-1.24745	0.112814	-11.0575	2.01591e-28	2.05475e-26
Gh_D11G1501	1793.06	-1.68821	0.152695	-11.0561	2.04726e-28	2.08313e-26
Gh_A06G1269	43623	3.32157	0.300822	11.0416	2.40618e-28	2.44416e-26
Gh_A05G2282	1476.07	-1.04625	0.0948571	-11.0297	2.74736e-28	2.78597e-26
Gh_Sca081746G01	8590.05	3.19246	0.289582	11.0244	2.91612e-28	2.95208e-26
Gh_D10G1512	108.75	-2.70393	0.245463	-11.0156	3.21339e-28	3.24749e-26
Gh_D11G1393	574.857	-1.28097	0.116483	-10.997	3.94987e-28	3.97828e-26
Gh_A05G0141	3755.92	-1.10137	0.100172	-10.9948	4.0503e-28	4.07253e-26
Gh_A11G2030	559.554	2.82302	0.256791	10.9934	4.11e-28	4.1256e-26
Gh_D06G0412	229.717	1.78564	0.162572	10.9837	4.57734e-28	4.58698e-26
Gh_A11G3152	1588.03	-1.23281	0.112339	-10.974	5.09841e-28	5.10056e-26
Gh_A13G2334	1145.52	-1.35827	0.123836	-10.9682	5.43182e-28	5.42498e-26
Gh_D04G1398	198.978	-2.81619	0.256997	-10.958	6.08018e-28	6.06236e-26
Gh_A13G0839	1764.79	1.83815	0.16792	10.9465	6.90312e-28	6.87138e-26
Gh_A10G1196	1055.89	-1.3101	0.12	-10.9175	9.50855e-28	9.44902e-26
Gh_D10G0369	222838	-2.5628	0.234829	-10.9135	9.93879e-28	9.8601e-26
Gh_D04G0579	721.163	-1.84643	0.169321	-10.905	1.09143e-27	1.08099e-25
Gh_A03G1240	2324.39	-1.31471	0.120634	-10.8984	1.17303e-27	1.15988e-25
Gh_A07G0863	1179.07	1.52858	0.140304	10.8948	1.22052e-27	1.20483e-25
Gh_D02G1608	940.069	-1.69173	0.155608	-10.8717	1.57189e-27	1.54912e-25
Gh_D07G0704	1342.8	-1.35484	0.124687	-10.8659	1.67609e-27	1.64908e-25
Gh_D09G0576	1860	-2.22334	0.204689	-10.8621	1.74753e-27	1.71653e-25
Gh_D05G2361	76190.9	-1.66721	0.153505	-10.861	1.76891e-27	1.73467e-25
Gh_A11G1267	929.071	-1.64657	0.15161	-10.8605	1.77685e-27	1.73959e-25
Gh_A04G0894	343.065	-2.33437	0.214988	-10.8582	1.82366e-27	1.78249e-25
Gh_A10G1862	1061.52	-2.7128	0.249865	-10.8571	1.84587e-27	1.80124e-25
Gh_A10G2119	185.309	4.32911	0.398921	10.852	1.95009e-27	1.89982e-25
Gh_A11G0861	492.579	-1.52681	0.140708	-10.8509	1.97558e-27	1.92151e-25
Gh_A13G0294	13521.2	1.79998	0.166316	10.8226	2.68925e-27	2.60713e-25
Gh_D03G1622	1633.82	-1.02234	0.094493	-10.8192	2.79071e-27	2.70108e-25
Gh_A01G0096	317.082	-2.71928	0.251356	-10.8184	2.81544e-27	2.7206e-25
Gh_A03G1160	1056.26	1.13801	0.105222	10.8152	2.91502e-27	2.81227e-25
Gh_D01G0544	559.237	-3.07387	0.284382	-10.8089	3.12281e-27	3.00299e-25
Gh_D03G0985	1007.5	1.52213	0.140826	10.8086	3.13379e-27	3.00869e-25
Gh_A06G0093	238.776	-2.84318	0.263176	-10.8033	3.31925e-27	3.18162e-25
Gh_D04G0746	1586.19	-2.09052	0.193511	-10.8031	3.32748e-27	3.18438e-25
Gh_D06G0151	1119.9	1.76728	0.16365	10.7991	3.47603e-27	3.3212e-25
Gh_A05G0346	1070.8	-1.40197	0.12983	-10.7985	3.50062e-27	3.33933e-25
Gh_D05G0409	1511.03	1.12253	0.104031	10.7903	3.82477e-27	3.64271e-25
Gh_D11G1764	415.98	-2.02665	0.18799	-10.7806	4.25173e-27	4.04288e-25
Gh_D11G3480	1399.81	1.28394	0.119132	10.7775	4.39513e-27	4.17257e-25
Gh_D13G2542	137.981	-3.02345	0.280566	-10.7763	4.45629e-27	4.22389e-25
Gh_A10G1296	2670.77	-1.43801	0.133477	-10.7735	4.59247e-27	4.34606e-25
Gh_A01G1846	159.023	-1.91484	0.177781	-10.7708	4.73047e-27	4.46955e-25
Gh_A05G2646	605.885	-1.60542	0.149209	-10.7596	5.34029e-27	5.03773e-25
Gh_D09G1409	1319.23	-3.92362	0.365113	-10.7463	6.16713e-27	5.80852e-25
Gh_A10G0583	1627.64	1.90202	0.177161	10.7361	6.88729e-27	6.47656e-25
Gh_A05G0850	1753.56	1.09824	0.102295	10.7359	6.90078e-27	6.479e-25
Gh_D11G2309	630.123	2.01222	0.187436	10.7355	6.93144e-27	6.49754e-25
Gh_A03G0029	979.298	-1.22567	0.114202	-10.7325	7.16416e-27	6.70514e-25
Gh_D09G1078	983.018	-1.84563	0.172015	-10.7295	7.40154e-27	6.91644e-25
Gh_A09G1214	1002.35	-1.32458	0.123523	-10.7234	7.90344e-27	7.37386e-25
Gh_A11G0646	334.415	-2.14204	0.199806	-10.7206	8.14403e-27	7.58644e-25
Gh_D08G0384	438.388	-2.76062	0.257623	-10.7157	8.58881e-27	7.98826e-25
Gh_D06G0571	482.941	1.44305	0.134714	10.7119	8.94927e-27	8.31053e-25
Gh_A03G2151	1007.42	-1.26939	0.11858	-10.7049	9.64931e-27	8.93274e-25
Gh_A06G0966	3196.84	-1.47874	0.138201	-10.6999	1.01864e-26	9.40069e-25
Gh_D01G2232	62073.1	-1.33335	0.124619	-10.6995	1.02364e-26	9.43218e-25
Gh_D08G0512	665.624	1.1771	0.110041	10.697	1.05164e-26	9.67529e-25
Gh_A12G2475	2397.93	-1.02139	0.095585	-10.6856	1.18831e-26	1.09157e-24
Gh_A11G1205	469.923	-1.98669	0.18606	-10.6777	1.29465e-26	1.18743e-24
Gh_A13G0283	1523.87	1.33494	0.125232	10.6597	1.57071e-26	1.4384e-24
Gh_D10G1050	1758.37	1.36582	0.128211	10.6529	1.69082e-26	1.54603e-24
Gh_A04G0966	152.022	-5.50256	0.517154	-10.6401	1.93992e-26	1.77107e-24
Gh_A12G0039	3412.67	-1.56347	0.146975	-10.6377	1.99048e-26	1.81445e-24
Gh_D09G1113	1772.23	1.47486	0.138653	10.6371	2.00283e-26	1.82291e-24
Gh_D03G0099	319.47	1.99814	0.188079	10.6239	2.30646e-26	2.09606e-24
Gh_A09G1633	92.09	-1.96743	0.185211	-10.6227	2.33797e-26	2.12146e-24
Gh_D03G0364	910.154	1.43923	0.135545	10.6181	2.45428e-26	2.22023e-24
Gh_A09G1070	532.992	-1.96368	0.184988	-10.6152	2.53316e-26	2.28811e-24
Gh_A11G2970	152.959	-2.69256	0.253683	-10.6139	2.56865e-26	2.31665e-24
Gh_D05G0127	317.391	-1.17021	0.110292	-10.6102	2.67227e-26	2.40646e-24
Gh_D08G1888	2194.88	-1.18561	0.11188	-10.5972	3.07198e-26	2.75806e-24
Gh_A09G1685	320.748	-1.98186	0.187071	-10.5942	3.17137e-26	2.84301e-24
Gh_A05G1022	677.227	-1.57773	0.14915	-10.5781	3.76409e-26	3.36423e-24
Gh_A06G1013	1808.04	1.14296	0.108086	10.5745	3.91085e-26	3.49016e-24
Gh_A07G1954	798.204	-1.78424	0.168734	-10.5743	3.92219e-26	3.49504e-24
Gh_A11G3269	323.405	1.52572	0.144312	10.5723	4.00448e-26	3.56303e-24
Gh_A01G1349	40978.1	-1.43378	0.135697	-10.5661	4.28119e-26	3.80031e-24
Gh_A05G2369	1007.96	1.26346	0.119578	10.566	4.28392e-26	3.80031e-24
Gh_D04G1703	754.86	-1.87153	0.177147	-10.5649	4.33548e-26	3.84032e-24
Gh_A01G1973	183.897	2.26223	0.214159	10.5633	4.40791e-26	3.89868e-24
Gh_A11G0672	766.315	1.55003	0.146805	10.5584	4.6427e-26	4.10025e-24
Gh_A05G3692	1417.28	1.47829	0.140015	10.5581	4.65978e-26	4.10924e-24
Gh_A08G2422	123.857	3.82369	0.362239	10.5557	4.78066e-26	4.2096e-24
Gh_D05G3934	1540.27	-1.00092	0.0948628	-10.5513	5.01222e-26	4.40698e-24
Gh_D03G1749	990.172	1.01891	0.0965916	10.5487	5.15066e-26	4.52202e-24
Gh_A11G1502	1452.54	-2.106	0.199691	-10.5463	5.28461e-26	4.63279e-24
Gh_D01G1467	606.73	-2.12633	0.201787	-10.5375	5.80309e-26	5.07984e-24
Gh_A05G2432	359.458	-5.34821	0.507974	-10.5285	6.3828e-26	5.57091e-24
Gh_A12G0916	803.197	-4.07217	0.386843	-10.5267	6.51062e-26	5.67415e-24
Gh_D08G1343	280.85	-2.12187	0.2016	-10.5252	6.6143e-26	5.75608e-24
Gh_A01G0957	329.998	-1.60739	0.152795	-10.5199	6.99251e-26	6.07259e-24
Gh_A10G1183	2913.15	1.4993	0.142521	10.5199	6.9984e-26	6.07259e-24
Gh_A08G0360	571.096	1.64842	0.156756	10.5158	7.30199e-26	6.3268e-24
Gh_A05G1282	1837.08	1.8266	0.173788	10.5105	7.72683e-26	6.68516e-24
Gh_D08G2453	1060.45	-1.17416	0.11184	-10.4986	8.76298e-26	7.57063e-24
Gh_D11G0430	783.085	-1.16172	0.110689	-10.4953	9.07877e-26	7.83208e-24
Gh_A05G0167	2215.05	1.3713	0.130689	10.4929	9.3159e-26	8.02502e-24
Gh_A09G1809	2857.46	-2.00918	0.191676	-10.4821	1.04352e-25	8.97621e-24
Gh_D13G1445	4597.6	-1.63567	0.156046	-10.482	1.04521e-25	8.97775e-24
Gh_D10G1463	3375.72	1.14831	0.109581	10.4791	1.07818e-25	9.24768e-24
Gh_D12G1634	148.107	2.2267	0.212505	10.4784	1.08604e-25	9.30168e-24
Gh_A03G0459	1162.94	1.13217	0.108096	10.4737	1.1408e-25	9.75667e-24
Gh_A12G1509	135.42	-3.30954	0.316046	-10.4717	1.16523e-25	9.95131e-24
Gh_A09G0270	213.027	4.07784	0.389504	10.4693	1.19501e-25	1.0191e-23
Gh_A10G1673	823.665	2.26785	0.216641	10.4683	1.20823e-25	1.0289e-23
Gh_D05G1597	140.548	-2.69405	0.257375	-10.4674	1.21945e-25	1.03697e-23
Gh_D10G1166	2203.19	-1.96187	0.187449	-10.4662	1.23555e-25	1.04916e-23
Gh_D05G2807	337.125	-3.67409	0.351337	-10.4575	1.35424e-25	1.14831e-23
Gh_D13G2489	3617.88	2.44695	0.234031	10.4557	1.38031e-25	1.16874e-23
Gh_D12G2089	1154.35	1.27773	0.122218	10.4545	1.39805e-25	1.18209e-23
Gh_D08G2470	136.679	-2.05722	0.196886	-10.4488	1.48358e-25	1.25263e-23
Gh_A11G1352	80.5939	-3.60266	0.345079	-10.4401	1.62636e-25	1.37123e-23
Gh_A10G1120	1313.22	1.1834	0.113435	10.4323	1.76474e-25	1.48581e-23
Gh_D05G1837	1340.59	1.08841	0.104386	10.4268	1.87176e-25	1.57368e-23
Gh_A11G1764	580.377	-1.6966	0.16275	-10.4246	1.91531e-25	1.60802e-23
Gh_D02G2027	184.014	-3.35975	0.322323	-10.4236	1.93584e-25	1.62297e-23
Gh_D02G1319	9036.63	1.28954	0.123754	10.4202	2.00559e-25	1.67909e-23
Gh_D06G0066	202.854	-2.91248	0.279946	-10.4037	2.38487e-25	1.99381e-23
Gh_A11G0862	1139.14	-1.5136	0.14553	-10.4006	2.46487e-25	2.0578e-23
Gh_A05G0266	924.995	-1.86501	0.179328	-10.4	2.47994e-25	2.06749e-23
Gh_A03G0325	78.4312	-3.81229	0.367043	-10.3865	2.85736e-25	2.3788e-23
Gh_A13G1231	713.215	-1.65938	0.15981	-10.3835	2.94779e-25	2.45066e-23
Gh_A11G2591	1103.85	-1.47788	0.142331	-10.3834	2.95216e-25	2.45087e-23
Gh_A13G1604	818.817	-2.58656	0.249153	-10.3814	3.01271e-25	2.49765e-23
Gh_D10G2127	1791.26	-2.21864	0.213811	-10.3767	3.16681e-25	2.62176e-23
Gh_A05G1173	285.13	-2.29651	0.221537	-10.3662	3.53225e-25	2.91619e-23
Gh_A07G0485	3822.54	1.53093	0.147783	10.3593	3.7979e-25	3.13116e-23
Gh_D07G1929	1335.38	-2.57716	0.248966	-10.3515	4.12145e-25	3.39321e-23
Gh_A12G2359	511.799	-2.22042	0.214607	-10.3464	4.34333e-25	3.57095e-23
Gh_D13G2147	760.574	-1.29345	0.125081	-10.341	4.59933e-25	3.77621e-23
Gh_D02G1144	978.471	-1.67617	0.162097	-10.3405	4.61928e-25	3.78737e-23
Gh_A03G0091	245.88	-2.08024	0.201344	-10.3318	5.05969e-25	4.13706e-23
Gh_A12G1510	167.151	2.03615	0.197075	10.3319	5.05524e-25	4.13706e-23
Gh_A05G0616	764.955	-1.85662	0.179828	-10.3244	5.46522e-25	4.46251e-23
Gh_D13G1976	1143.2	1.18989	0.115281	10.3217	5.62436e-25	4.57989e-23
Gh_A12G1592	165.075	-1.71318	0.166141	-10.3116	6.24552e-25	5.07875e-23
Gh_A12G2465	360.206	-2.95836	0.287177	-10.3015	6.93568e-25	5.63228e-23
Gh_D03G1507	460.529	-2.54032	0.246662	-10.2988	7.13615e-25	5.78718e-23
Gh_D05G1198	396.604	1.4262	0.138559	10.2931	7.56855e-25	6.12949e-23
Gh_D09G1252	436.059	-1.28031	0.124393	-10.2924	7.62143e-25	6.16394e-23
Gh_A01G0963	164.689	-1.75155	0.170259	-10.2876	8.01695e-25	6.47502e-23
Gh_A09G0354	1399	-1.02552	0.0997739	-10.2784	8.81411e-25	7.10921e-23
Gh_A03G1759	1594.71	-1.38322	0.134608	-10.276	9.04415e-25	7.28488e-23
Gh_A13G0691	109.622	2.96234	0.288388	10.2721	9.41723e-25	7.57514e-23
Gh_D11G2568	458.14	-2.36928	0.230696	-10.2702	9.60462e-25	7.71545e-23
Gh_D01G2233	232.774	1.90973	0.18612	10.2607	1.05889e-24	8.49468e-23
Gh_A07G2182	52408.4	-1.99759	0.194758	-10.2568	1.10315e-24	8.82598e-23
Gh_D01G0689	5290.84	1.23644	0.120559	10.2559	1.11359e-24	8.89747e-23
Gh_A05G2128	5712.8	1.29476	0.126364	10.2463	1.22997e-24	9.81424e-23
Gh_D07G0885	631.912	1.4866	0.145167	10.2406	1.30428e-24	1.03932e-22
Gh_D06G2263	104.14	-2.71126	0.264928	-10.2339	1.39723e-24	1.11042e-22
Gh_D07G1957	659.092	1.34848	0.131784	10.2325	1.41824e-24	1.12561e-22
Gh_D13G2431	339.63	-1.7503	0.171069	-10.2315	1.4323e-24	1.13526e-22
Gh_A07G0245	2638.28	1.12141	0.109632	10.2289	1.47231e-24	1.16542e-22
Gh_D13G0836	4112.52	1.74772	0.17092	10.2254	1.52672e-24	1.20688e-22
Gh_A05G1099	6227.38	-2.65223	0.259394	-10.2247	1.53677e-24	1.21322e-22
Gh_D01G1914	1152.43	1.04977	0.102697	10.2221	1.57896e-24	1.24487e-22
Gh_D10G1770	1003.23	-1.21499	0.118945	-10.2147	1.70355e-24	1.34132e-22
Gh_A05G2921	235.552	2.95318	0.289195	10.2117	1.75699e-24	1.38157e-22
Gh_A12G2096	968.446	1.89979	0.186288	10.1982	2.0208e-24	1.58692e-22
Gh_A10G1020	62.8301	-3.06058	0.300137	-10.1973	2.03945e-24	1.59945e-22
Gh_A06G0637	735.442	-1.345	0.131981	-10.1909	2.17716e-24	1.7052e-22
Gh_D07G2352	768.331	-1.87996	0.184606	-10.1836	2.34615e-24	1.83514e-22
Gh_A11G1816	576.425	-2.26357	0.22246	-10.1752	2.5589e-24	1.99893e-22
Gh_D10G2422	3995.39	1.37705	0.135405	10.1699	2.70226e-24	2.10815e-22
Gh_A11G1353	1690.75	-1.52702	0.15022	-10.1652	2.83629e-24	2.20982e-22
Gh_A09G2229	181.689	-2.81494	0.276942	-10.1644	2.85903e-24	2.22463e-22
Gh_D01G0163	3113.22	-1.53499	0.151023	-10.1639	2.87267e-24	2.23232e-22
Gh_D04G0791	300.146	-3.64814	0.35921	-10.156	3.11638e-24	2.41854e-22
Gh_D12G2376	324.268	-1.72628	0.170056	-10.1513	3.27075e-24	2.53505e-22
Gh_Sca011408G01	1216.89	1.47922	0.146026	10.1298	4.07365e-24	3.15324e-22
Gh_D07G1090	6266.13	-1.95112	0.192618	-10.1295	4.08841e-24	3.16055e-22
Gh_D05G2400	225.328	-2.147	0.211975	-10.1285	4.12831e-24	3.18726e-22
Gh_D11G2115	508.039	-1.4125	0.139645	-10.1149	4.74564e-24	3.65439e-22
Gh_A08G2235	527.741	-2.95843	0.292556	-10.1124	4.86932e-24	3.74478e-22
Gh_A11G2550	655.542	1.89868	0.18818	10.0897	6.13701e-24	4.70755e-22
Gh_Sca005103G02	1159.14	2.20683	0.218753	10.0882	6.23031e-24	4.77296e-22
Gh_D05G1870	599.984	-2.28494	0.226638	-10.0819	6.64319e-24	5.08272e-22
Gh_A12G0365	387.995	1.65	0.16367	10.0812	6.68741e-24	5.10999e-22
Gh_D12G1857	1017.7	3.26199	0.324116	10.0643	7.94844e-24	6.06578e-22
Gh_D10G1817	105.879	-2.35646	0.234157	-10.0636	8.00337e-24	6.09988e-22
Gh_A05G0980	428.249	2.09681	0.208618	10.051	9.09585e-24	6.92366e-22
Gh_D06G1434	441.763	1.90383	0.189504	10.0464	9.52806e-24	7.2434e-22
Gh_D05G2384	6672.78	1.31432	0.13089	10.0414	1.00239e-23	7.61063e-22
Gh_A03G1098	1766.11	-1.25077	0.124608	-10.0377	1.04108e-23	7.89429e-22
Gh_D05G1668	590.764	-1.66807	0.166198	-10.0366	1.0522e-23	7.96847e-22
Gh_D03G1080	959.377	1.14061	0.114052	10.0007	1.51251e-23	1.14254e-21
Gh_A06G1081	339.672	1.72421	0.172421	9.99998	1.52425e-23	1.14995e-21
Gh_A03G1613	144.401	-3.55403	0.356263	-9.97588	1.9437e-23	1.46454e-21
Gh_D02G0690	2911.99	-1.45902	0.146313	-9.97193	2.02262e-23	1.52208e-21
Gh_D10G0641	2480.99	1.31396	0.131836	9.96664	2.13315e-23	1.60323e-21
Gh_A02G0283	1898.63	-2.66268	0.267269	-9.96256	2.22266e-23	1.6684e-21
Gh_A13G2060	372.916	-1.68563	0.169226	-9.96082	2.26181e-23	1.69352e-21
Gh_D13G2550	15902.1	1.44889	0.145458	9.96089	2.2603e-23	1.69352e-21
Gh_D04G2022	401.147	-3.21206	0.322643	-9.95543	2.38784e-23	1.78563e-21
Gh_D03G1715	482.562	-1.4661	0.147294	-9.95354	2.43369e-23	1.81763e-21
Gh_D05G0921	1450.8	1.1026	0.110802	9.95106	2.49518e-23	1.8589e-21
Gh_A10G1745	887.242	1.15567	0.116188	9.94657	2.61012e-23	1.93967e-21
Gh_D09G1274	495.202	1.57995	0.158864	9.9453	2.64385e-23	1.96228e-21
Gh_D13G1892	733.819	-1.80129	0.181256	-9.93784	2.84938e-23	2.1122e-21
Gh_D09G1781	350.215	-1.5551	0.15655	-9.9336	2.97317e-23	2.19848e-21
Gh_D09G1443	1759.79	1.05522	0.106357	9.9215	3.35675e-23	2.47904e-21
Gh_A07G2336	496.765	1.31281	0.132364	9.91825	3.46794e-23	2.55798e-21
Gh_A05G1679	187.188	-1.96699	0.198387	-9.91492	3.5854e-23	2.64135e-21
Gh_D02G0456	4094.14	1.0274	0.103638	9.91334	3.64261e-23	2.68018e-21
Gh_A08G0775	594.329	-2.00867	0.202629	-9.91305	3.65316e-23	2.68462e-21
Gh_A04G1277	198.479	-3.81739	0.385234	-9.90928	3.79371e-23	2.78447e-21
Gh_A12G1591	285.407	-1.79514	0.181181	-9.90801	3.84215e-23	2.81655e-21
Gh_A13G1123	1214.82	-1.42791	0.144132	-9.907	3.88142e-23	2.84184e-21
Gh_D05G2659	182.7	-3.30163	0.333301	-9.90585	3.92611e-23	2.87103e-21
Gh_D09G1653	150.089	-1.9513	0.197038	-9.90319	4.03192e-23	2.94479e-21
Gh_A09G2394	285.9	-2.15814	0.217957	-9.90165	4.09472e-23	2.98699e-21
Gh_D11G2971	273.335	-2.35053	0.237579	-9.89367	4.43483e-23	3.22718e-21
Gh_A04G0538	1943.68	-1.25228	0.126635	-9.88886	4.65311e-23	3.37776e-21
Gh_A11G3115	3248.06	1.05488	0.106871	9.8706	5.58271e-23	4.04271e-21
Gh_D10G1101	472.259	-1.68148	0.170489	-9.86268	6.04138e-23	4.36423e-21
Gh_A12G0022	421.495	-2.68182	0.272026	-9.8587	6.28583e-23	4.53532e-21
Gh_A05G0658	978.762	1.39043	0.141093	9.85466	6.54362e-23	4.71561e-21
Gh_A01G0035	252.249	-1.32693	0.134718	-9.84974	6.87233e-23	4.93774e-21
Gh_D05G1090	498.518	2.29502	0.233005	9.84969	6.87559e-23	4.93774e-21
Gh_D13G2210	102.104	-2.54762	0.25865	-9.84967	6.87675e-23	4.93774e-21
Gh_A13G1951	272.168	1.59846	0.162326	9.84723	7.04612e-23	5.05326e-21
Gh_D10G2360	833.94	-3.69573	0.375459	-9.84325	7.33038e-23	5.25079e-21
Gh_A06G1481	866.516	1.48004	0.150404	9.84043	7.53863e-23	5.39347e-21
Gh_A12G2406	1937.02	-2.48862	0.252925	-9.83939	7.61718e-23	5.44313e-21
Gh_D02G0348	1760.62	-2.6613	0.270869	-9.82507	8.78154e-23	6.26013e-21
Gh_A02G0949	590.109	-1.28689	0.131125	-9.81419	9.7819e-23	6.9566e-21
Gh_D05G0655	811.509	-1.03909	0.105892	-9.81272	9.92598e-23	7.05065e-21
Gh_A03G2085	492.043	-1.20839	0.123322	-9.7987	1.14049e-22	8.09148e-21
Gh_D11G0807	265.006	1.898	0.193759	9.79563	1.17565e-22	8.33103e-21
Gh_D07G2077	139.988	-2.06667	0.211045	-9.79255	1.21204e-22	8.5787e-21
Gh_D05G1030	399.806	1.6192	0.16542	9.78841	1.26267e-22	8.92643e-21
Gh_A05G3538	291.677	2.01446	0.205841	9.78649	1.2868e-22	9.08624e-21
Gh_A12G2229	433.179	-2.03977	0.20861	-9.7779	1.40093e-22	9.88034e-21
Gh_A13G0355	477.958	-1.16097	0.11881	-9.77168	1.48955e-22	1.0492e-20
Gh_D09G0007	1029.71	1.12213	0.114836	9.77157	1.49118e-22	1.0492e-20
Gh_A07G2037	240.01	1.91452	0.195969	9.7695	1.52197e-22	1.0696e-20
Gh_D13G0930	1181.87	-1.4263	0.146008	-9.7686	1.53556e-22	1.07788e-20
Gh_D05G0037	76.9654	-4.1258	0.422599	-9.76293	1.62399e-22	1.13861e-20
Gh_A12G1860	2694.53	1.21852	0.124848	9.76002	1.67123e-22	1.17035e-20
Gh_D10G0167	31200.9	-1.36753	0.140277	-9.74879	1.86688e-22	1.30583e-20
Gh_D13G0825	329.164	-1.39583	0.143323	-9.73905	2.05465e-22	1.43548e-20
Gh_A03G2087	91.3548	2.96297	0.30426	9.73828	2.07021e-22	1.44466e-20
Gh_D08G0670	677.041	1.72291	0.177149	9.72573	2.34225e-22	1.63067e-20
Gh_A11G0382	316.781	-1.44792	0.148891	-9.72468	2.36657e-22	1.64568e-20
Gh_D02G1253	1615.11	-3.50137	0.360091	-9.72358	2.39219e-22	1.66155e-20
Gh_D05G0803	1491.37	1.27276	0.130903	9.72296	2.40691e-22	1.66789e-20
Gh_A05G3824	438.602	1.33348	0.137284	9.71325	2.64762e-22	1.83042e-20
Gh_A06G0942	297.838	1.43979	0.148288	9.70938	2.75017e-22	1.89911e-20
Gh_D07G1184	136.659	-2.0986	0.216242	-9.70485	2.87501e-22	1.98303e-20
Gh_A13G0496	99.1749	-3.01592	0.310932	-9.69963	3.02607e-22	2.08239e-20
Gh_D13G2354	123.264	2.46983	0.254702	9.69694	3.10675e-22	2.13544e-20
Gh_A08G2444	262.485	2.02004	0.208481	9.68931	3.34768e-22	2.29839e-20
Gh_A02G0571	199.91	1.55133	0.160129	9.688	3.39108e-22	2.32551e-20
Gh_D09G1404	7876.34	1.84273	0.190328	9.68186	3.60098e-22	2.46377e-20
Gh_A06G0682	668.231	-1.14786	0.118629	-9.67605	3.81158e-22	2.60189e-20
Gh_D08G1732	429.819	-1.63948	0.16954	-9.67012	4.039e-22	2.74767e-20
Gh_D02G0555	647.757	-2.53113	0.261803	-9.66808	4.12038e-22	2.79983e-20
Gh_D01G1025	852.499	1.05447	0.109154	9.66034	4.44368e-22	3.01264e-20
Gh_D10G1077	113.618	2.18461	0.226294	9.65387	4.73361e-22	3.20191e-20
Gh_D13G0048	182.695	1.54604	0.160156	9.65334	4.75822e-22	3.21491e-20
Gh_A04G1194	1782.76	-1.30371	0.135063	-9.65262	4.79149e-22	3.23371e-20
Gh_A05G1052	99.5292	3.08814	0.320203	9.64431	5.19602e-22	3.50275e-20
Gh_D08G1677	950.052	-1.44218	0.149755	-9.63026	5.95796e-22	4.01185e-20
Gh_D12G0195	2115.96	-1.5408	0.159999	-9.63008	5.96847e-22	4.01439e-20
Gh_A13G1197	740.59	2.15243	0.223592	9.62658	6.17483e-22	4.1485e-20
Gh_A11G2814	5325.95	-1.22506	0.127273	-9.62544	6.24365e-22	4.19e-20
Gh_A03G1464	524.618	-1.01947	0.105921	-9.62487	6.27863e-22	4.20873e-20
Gh_A12G1170	82.8139	-3.56589	0.370517	-9.62408	6.32706e-22	4.23643e-20
Gh_A08G0574	1550.67	1.35751	0.141056	9.62392	6.33697e-22	4.2383e-20
Gh_D01G2181	114.31	-2.5739	0.267508	-9.62176	6.4712e-22	4.32321e-20
Gh_D06G0296	743.333	-1.48255	0.154112	-9.61992	6.58822e-22	4.39645e-20
Gh_A12G2112	126.639	-3.04064	0.316113	-9.61885	6.65712e-22	4.43746e-20
Gh_D12G0054	3284.95	-1.48083	0.153973	-9.61744	6.74922e-22	4.49382e-20
Gh_A13G1699	10105.1	-1.2951	0.134669	-9.61693	6.78254e-22	4.51095e-20
Gh_A13G0809	1363.49	-2.27582	0.236755	-9.61252	7.07915e-22	4.69806e-20
Gh_D13G1033	891.209	1.22146	0.12707	9.61252	7.07965e-22	4.69806e-20
Gh_A07G1678	395.731	1.88214	0.196014	9.6021	7.83282e-22	5.19208e-20
Gh_A05G0922	391.116	1.14179	0.119003	9.59456	8.42736e-22	5.57996e-20
Gh_A10G0723	1544.86	-1.2382	0.12907	-9.59324	8.53594e-22	5.64557e-20
Gh_D04G1229	107.237	-3.12899	0.326261	-9.59045	8.76979e-22	5.79381e-20
Gh_A11G2610	328.851	-1.93327	0.201755	-9.58227	9.49365e-22	6.26507e-20
Gh_A12G1274	69.8392	-2.34901	0.245198	-9.58005	9.70024e-22	6.39432e-20
Gh_D02G1272	1332.89	-1.22807	0.128278	-9.57353	1.03321e-21	6.80331e-20
Gh_A03G1272	157.889	-1.85415	0.193695	-9.57254	1.04312e-21	6.86097e-20
Gh_A07G1899	113.414	-2.88492	0.301392	-9.57199	1.04863e-21	6.88961e-20
Gh_D09G2346	295.158	1.74756	0.182589	9.57101	1.05866e-21	6.94782e-20
Gh_A09G0059	1095.76	-1.27506	0.133236	-9.56993	1.06982e-21	7.01335e-20
Gh_A11G2249	1542.92	-1.03806	0.10848	-9.56917	1.0777e-21	7.0572e-20
Gh_A11G1231	217.825	-1.65216	0.172855	-9.55811	1.19925e-21	7.84453e-20
Gh_D08G2485	384.215	-1.2852	0.134495	-9.55568	1.22772e-21	8.02199e-20
Gh_A05G1451	550.17	-1.50289	0.157349	-9.55132	1.28054e-21	8.35111e-20
Gh_D04G1715	103.649	-2.32696	0.243666	-9.54978	1.29969e-21	8.46436e-20
Gh_A08G1679	6913.09	-1.27504	0.133544	-9.54773	1.32572e-21	8.62445e-20
Gh_A03G1927	30758.6	-1.30084	0.136252	-9.54733	1.33083e-21	8.64823e-20
Gh_D07G1532	1015.26	1.31484	0.137758	9.54459	1.36645e-21	8.86999e-20
Gh_D07G1832	5152.56	1.79666	0.188393	9.53678	1.47339e-21	9.55377e-20
Gh_A01G0431	1024.32	1.79663	0.188571	9.52761	1.60952e-21	1.04251e-19
Gh_D12G1724	1830.77	-1.15801	0.121565	-9.52588	1.63644e-21	1.0588e-19
Gh_D12G0673	298.389	-1.5435	0.162068	-9.52378	1.66993e-21	1.07812e-19
Gh_A08G0525	1976.11	1.07434	0.112824	9.52219	1.69568e-21	1.09356e-19
Gh_D01G1252	389.479	-1.51061	0.158748	-9.51579	1.80345e-21	1.1618e-19
Gh_A12G1993	625.729	-1.76779	0.185911	-9.50883	1.92812e-21	1.24077e-19
Gh_A08G2181	476.177	2.06283	0.216973	9.50731	1.95662e-21	1.25775e-19
Gh_D10G1385	1281.09	1.15679	0.121785	9.49861	2.12702e-21	1.36582e-19
Gh_D11G2289	1990.43	1.08784	0.114537	9.49769	2.14589e-21	1.37645e-19
Gh_D03G0780	645.404	-2.49518	0.262911	-9.49057	2.29781e-21	1.47072e-19
Gh_A08G0310	326.099	-1.36606	0.143944	-9.49022	2.30551e-21	1.47407e-19
Gh_D09G1513	2319.88	-1.75914	0.185413	-9.48771	2.36175e-21	1.5084e-19
Gh_A05G3065	1012.74	-1.22275	0.128904	-9.48576	2.4063e-21	1.53521e-19
Gh_A10G0527	591.036	1.92021	0.202815	9.46778	2.85861e-21	1.82183e-19
Gh_D08G0732	384.79	-1.10709	0.116985	-9.46357	2.97612e-21	1.89469e-19
Gh_D10G1903	793.049	-1.95648	0.206802	-9.46061	3.06141e-21	1.9469e-19
Gh_D06G0393	830.39	1.18658	0.125444	9.45897	3.10996e-21	1.97567e-19
Gh_A08G0632	461.618	-1.27309	0.134663	-9.45392	3.26374e-21	2.07115e-19
Gh_A13G0810	2524.82	-2.18945	0.231622	-9.45266	3.30322e-21	2.09397e-19
Gh_D12G2213	688.858	1.10001	0.116388	9.45117	3.35049e-21	2.12168e-19
Gh_D11G1392	13766.9	-1.23044	0.130273	-9.44509	3.55101e-21	2.24627e-19
Gh_A11G0734	1423.3	1.36827	0.144872	9.44467	3.56518e-21	2.25284e-19
Gh_A13G2053	576.078	-1.08842	0.115281	-9.44145	3.67668e-21	2.32083e-19
Gh_A01G0956	942.081	-1.03867	0.110098	-9.43404	3.94582e-21	2.48808e-19
Gh_A12G2192	96.414	-3.00531	0.318583	-9.43337	3.97125e-21	2.50052e-19
Gh_D06G0761	205.037	-1.77251	0.1879	-9.43326	3.97539e-21	2.50052e-19
Gh_D05G0533	3144.55	-3.56446	0.377986	-9.43012	4.09612e-21	2.57196e-19
Gh_D07G0883	92.7531	-2.59597	0.275471	-9.42376	4.35222e-21	2.72988e-19
Gh_D12G2031	2261.46	1.34242	0.142598	9.41405	4.77389e-21	2.99122e-19
Gh_D01G0438	859.718	1.80221	0.191529	9.40959	4.98075e-21	3.11755e-19
Gh_A10G0569	518.512	1.27368	0.135442	9.40387	5.25922e-21	3.28839e-19
Gh_Sca074112G01	374.67	-1.45678	0.15498	-9.39975	5.46934e-21	3.41618e-19
Gh_A03G0473	705.166	-1.61493	0.171859	-9.39682	5.62347e-21	3.5051e-19
Gh_A12G1371	216.033	-2.24784	0.239244	-9.39558	5.69008e-21	3.54291e-19
Gh_D10G2359	698.474	-3.36331	0.358022	-9.39416	5.76778e-21	3.58754e-19
Gh_D08G1044	1483.39	1.04475	0.111256	9.39054	5.96953e-21	3.70915e-19
Gh_A11G1248	897.441	-1.43526	0.152871	-9.38868	6.07576e-21	3.77121e-19
Gh_D05G1481	286.119	1.37204	0.146141	9.38844	6.08936e-21	3.77572e-19
Gh_A03G0016	1609.92	-2.31391	0.246654	-9.38119	6.52318e-21	4.0405e-19
Gh_Sca017089G01	1528.93	-1.25205	0.133501	-9.37863	6.68368e-21	4.13561e-19
Gh_D11G1131	137.663	-3.4862	0.37221	-9.36621	7.51846e-21	4.64249e-19
Gh_D05G2948	471.253	-1.24581	0.133136	-9.35745	8.1685e-21	5.03865e-19
Gh_D03G0544	806.281	1.52435	0.16292	9.35641	8.24896e-21	5.08302e-19
Gh_D01G1508	45758.7	-1.51698	0.162229	-9.35082	8.69695e-21	5.35353e-19
Gh_D13G0446	232.219	-1.69366	0.181142	-9.34993	8.77089e-21	5.39347e-19
Gh_A13G1959	145.596	2.32436	0.248661	9.34749	8.97512e-21	5.50767e-19
Gh_A13G2072	537.006	-1.40879	0.150713	-9.34753	8.97221e-21	5.50767e-19
Gh_D10G1316	4562.3	1.46337	0.156765	9.33477	1.01212e-20	6.2046e-19
Gh_A12G1044	666.818	1.0683	0.114501	9.33006	1.05808e-20	6.47962e-19
Gh_D12G2267	1627.66	1.42822	0.153182	9.32371	1.12345e-20	6.87289e-19
Gh_A10G2195	24775.3	-1.2736	0.13676	-9.31263	1.24708e-20	7.62137e-19
Gh_D06G0396	654.231	1.34363	0.144311	9.31068	1.27015e-20	7.75444e-19
Gh_D08G0635	414.097	1.70665	0.183339	9.3087	1.29403e-20	7.89211e-19
Gh_A08G1581	2077.8	-1.00981	0.108499	-9.30715	1.3131e-20	8.00024e-19
Gh_D04G1785	2838.52	-1.02524	0.110163	-9.30656	1.32043e-20	8.03665e-19
Gh_A01G1148	500.208	-1.47007	0.157988	-9.30498	1.34019e-20	8.14859e-19
Gh_A03G1679	2552.98	-1.1392	0.122564	-9.29471	1.47609e-20	8.96577e-19
Gh_A06G0047	312.806	-1.47281	0.158473	-9.2938	1.48877e-20	9.03354e-19
Gh_A01G1670	186.061	-2.28225	0.24561	-9.29216	1.51184e-20	9.16421e-19
Gh_D13G0236	15590	-1.71811	0.185045	-9.28479	1.62021e-20	9.81107e-19
Gh_A12G2036	245.913	1.42569	0.153567	9.28386	1.63443e-20	9.88716e-19
Gh_Sca005242G01	319.805	-1.815	0.195553	-9.2814	1.67272e-20	1.01085e-18
Gh_A08G2230	626.481	-1.85855	0.200307	-9.27852	1.71845e-20	1.03743e-18
Gh_A12G0020	291.648	-1.57859	0.170193	-9.2753	1.77112e-20	1.06815e-18
Gh_D01G1535	216.459	-2.33319	0.251726	-9.26874	1.88365e-20	1.13486e-18
Gh_A12G2035	603.911	1.21087	0.130713	9.26353	1.97791e-20	1.18924e-18
Gh_A08G0848	570.561	-1.42883	0.154354	-9.25684	2.10575e-20	1.26483e-18
Gh_A09G1544	209.136	1.86115	0.201101	9.25482	2.14584e-20	1.28761e-18
Gh_A11G0303	674.668	1.51951	0.164321	9.24723	2.3039e-20	1.37968e-18
Gh_D11G3338	374.222	-1.69205	0.183032	-9.24456	2.36202e-20	1.41306e-18
Gh_A10G1830	115.054	-2.88769	0.312433	-9.24259	2.40596e-20	1.4379e-18
Gh_A07G0298	576.571	-1.7413	0.188406	-9.24227	2.41327e-20	1.44082e-18
Gh_D10G2628	482.747	1.24098	0.134314	9.23934	2.48018e-20	1.47929e-18
Gh_A09G1558	333.111	-1.89864	0.205601	-9.2346	2.59262e-20	1.5448e-18
Gh_A12G2401	627.093	-2.0865	0.226092	-9.22858	2.74251e-20	1.63085e-18
Gh_D05G0805	5960.81	-1.12829	0.122276	-9.22735	2.77414e-20	1.64801e-18
Gh_D01G0705	168.423	-2.69542	0.292214	-9.22413	2.85883e-20	1.69663e-18
Gh_D02G0689	579.936	-1.16379	0.126174	-9.22373	2.86948e-20	1.70125e-18
Gh_A11G1607	613.063	-2.31956	0.251567	-9.22045	2.95867e-20	1.75239e-18
Gh_D02G1898	83.8678	-3.5941	0.389918	-9.21757	3.03898e-20	1.79816e-18
Gh_D12G2500	2782.42	-1.3635	0.147985	-9.21378	3.14832e-20	1.86101e-18
Gh_D05G1751	1525.74	-1.33693	0.145116	-9.21285	3.17577e-20	1.87352e-18
Gh_D10G2457	6189.17	-1.45651	0.158095	-9.21285	3.17569e-20	1.87352e-18
Gh_D05G1724	701.839	-2.07436	0.22519	-9.2116	3.21301e-20	1.89361e-18
Gh_Sca013634G01	881.482	1.9968	0.216794	9.21059	3.24327e-20	1.90955e-18
Gh_A07G2184	44040.9	-2.10175	0.228834	-9.18461	4.13023e-20	2.42937e-18
Gh_D05G1215	974.793	-1.2723	0.138551	-9.18291	4.19581e-20	2.46551e-18
Gh_D05G3327	273.943	1.79994	0.19608	9.17961	4.3265e-20	2.53979e-18
Gh_D01G1044	15756.9	1.0301	0.112228	9.17865	4.36518e-20	2.55959e-18
Gh_A02G0915	1146.95	1.00017	0.109003	9.17568	4.48724e-20	2.62638e-18
Gh_A09G1400	6585.72	2.00067	0.218045	9.17548	4.49578e-20	2.62879e-18
Gh_D02G2366	28452.8	-1.32821	0.144844	-9.16992	4.73359e-20	2.76513e-18
Gh_D10G0103	848.052	-1.06582	0.116256	-9.16792	4.82226e-20	2.81417e-18
Gh_A03G0794	78.7323	-3.59142	0.391799	-9.16649	4.88675e-20	2.84901e-18
Gh_A12G1621	3526.33	-1.20308	0.131325	-9.1611	5.13711e-20	2.99204e-18
Gh_A11G1357	53296.4	-1.75994	0.19233	-9.15063	5.66026e-20	3.2903e-18
Gh_D11G2375	571.541	2.04089	0.223155	9.14559	5.93034e-20	3.44393e-18
Gh_A12G2399	1380.97	-1.3934	0.152523	-9.13566	6.50071e-20	3.77149e-18
Gh_D13G0083	2815.51	-1.53565	0.168148	-9.1327	6.681e-20	3.86855e-18
Gh_A02G0179	721.267	-1.48449	0.162558	-9.13204	6.72206e-20	3.88854e-18
Gh_D12G2560	417.871	1.22811	0.134493	9.1314	6.76206e-20	3.90788e-18
Gh_D01G1843	181.223	2.34022	0.256336	9.1295	6.88148e-20	3.97303e-18
Gh_A01G1161	420.007	1.55652	0.170538	9.12714	7.03333e-20	4.05677e-18
Gh_A13G0226	289.43	-1.85449	0.203224	-9.12532	7.15274e-20	4.12165e-18
Gh_A05G1497	681.76	-1.91817	0.21022	-9.12455	7.20341e-20	4.14684e-18
Gh_D05G1349	227.183	-1.87499	0.205645	-9.1176	7.68089e-20	4.41744e-18
Gh_D09G1073	5244.26	-1.11336	0.122147	-9.11499	7.86787e-20	4.51866e-18
Gh_D10G1797	234.066	2.33267	0.255917	9.11493	7.87207e-20	4.51866e-18
Gh_D05G3812	148.803	1.81833	0.199571	9.11121	8.14717e-20	4.67207e-18
Gh_A08G2440	675.618	1.00661	0.110567	9.10401	8.70577e-20	4.98759e-18
Gh_A06G1394	516.714	1.18798	0.130506	9.10291	8.79403e-20	5.03331e-18
Gh_A12G2327	172.566	1.58648	0.174304	9.10182	8.88279e-20	5.07923e-18
Gh_A06G0810	2737.96	1.16098	0.1276	9.09863	9.14749e-20	5.22557e-18
Gh_D04G0145	2241.49	-1.77699	0.195367	-9.09564	9.40276e-20	5.36625e-18
Gh_D11G0852	1477.09	1.48865	0.16374	9.09152	9.7667e-20	5.56861e-18
Gh_D11G1504	70729.4	-1.70118	0.187152	-9.08986	9.91648e-20	5.6486e-18
Gh_A11G0828	321.363	-1.45908	0.160611	-9.08457	1.04106e-19	5.9244e-18
Gh_A11G2885	30.1408	-4.18012	0.460214	-9.083	1.05625e-19	6.00507e-18
Gh_A07G2288	239.682	-2.37966	0.262074	-9.08011	1.08462e-19	6.16048e-18
Gh_A12G1422	218.265	1.79754	0.198239	9.06754	1.21729e-19	6.90744e-18
Gh_D07G1199	765.282	1.3184	0.145455	9.06398	1.25778e-19	7.12364e-18
Gh_D12G2292	73.3821	-3.18788	0.351837	-9.06068	1.29645e-19	7.33564e-18
Gh_A02G0340	328.614	-2.04057	0.225301	-9.05705	1.34028e-19	7.57646e-18
Gh_A13G1523	494.498	-1.23646	0.136642	-9.04889	1.44431e-19	8.1568e-18
Gh_A06G1417	434.113	1.19313	0.131937	9.04315	1.52225e-19	8.58883e-18
Gh_A05G0620	587.742	-1.38491	0.153233	-9.03795	1.59631e-19	8.99816e-18
Gh_D13G1689	203.213	-3.3456	0.370517	-9.02955	1.72373e-19	9.70718e-18
Gh_A01G1523	773.091	-1.07384	0.119008	-9.02328	1.82534e-19	1.02697e-17
Gh_A04G0385	896.754	-1.1579	0.128383	-9.01915	1.89555e-19	1.06345e-17
Gh_A06G1854	1688.32	1.18459	0.131417	9.01398	1.98718e-19	1.11381e-17
Gh_D04G1444	27.7653	-4.19526	0.465586	-9.0107	2.04745e-19	1.14544e-17
Gh_D08G0363	514.94	1.10573	0.122757	9.00743	2.10939e-19	1.17788e-17
Gh_A08G0633	817.047	1.09112	0.121271	8.99737	2.31189e-19	1.28974e-17
Gh_D05G0820	159.382	-2.64648	0.294288	-8.99285	2.40906e-19	1.34269e-17
Gh_D04G0270	99.4907	-1.94679	0.216736	-8.98229	2.6519e-19	1.47665e-17
Gh_A11G2459	417.388	-1.72849	0.192497	-8.97934	2.72398e-19	1.51396e-17
Gh_A12G1912	377.209	1.7659	0.196729	8.97627	2.80095e-19	1.55094e-17
Gh_D04G0052	209.92	-1.89541	0.211246	-8.97256	2.89705e-19	1.60267e-17
Gh_D12G2676	794.104	1.96723	0.219303	8.97038	2.95498e-19	1.6332e-17
Gh_D01G1346	1131.58	1.05374	0.117573	8.96245	3.17531e-19	1.75334e-17
Gh_A07G1085	769.666	1.1703	0.130591	8.96156	3.20113e-19	1.76596e-17
Gh_A09G2226	1391.94	-1.29574	0.144681	-8.95587	3.37066e-19	1.85776e-17
Gh_D12G0885	525.098	1.53565	0.171858	8.93561	4.04938e-19	2.22566e-17
Gh_A10G0107	600.629	2.10902	0.236091	8.93308	4.14296e-19	2.275e-17
Gh_A11G2216	1054.1	1.24384	0.13925	8.9324	4.16873e-19	2.28704e-17
Gh_D05G2522	591.478	1.18946	0.133172	8.93178	4.19218e-19	2.29778e-17
Gh_A05G1962	2228.91	-1.12647	0.126125	-8.93136	4.20792e-19	2.30429e-17
Gh_D10G0896	379.815	-1.23074	0.137956	-8.92123	4.61138e-19	2.51828e-17
Gh_D02G2099	1324.06	-1.42471	0.159947	-8.9074	5.22433e-19	2.84933e-17
Gh_D05G0639	312.859	-1.26109	0.141578	-8.90734	5.22715e-19	2.84933e-17
Gh_D11G0244	1304.54	-2.37628	0.266965	-8.90109	5.53012e-19	3.01172e-17
Gh_D09G0107	4497.97	-1.15882	0.130313	-8.89265	5.96671e-19	3.24354e-17
Gh_A11G2856	3532.93	1.02378	0.115237	8.88413	6.44212e-19	3.49879e-17
Gh_D11G0310	662.653	-3.00973	0.339105	-8.87552	6.96064e-19	3.77352e-17
Gh_D12G0600	378.879	-1.83491	0.206764	-8.87445	7.02785e-19	3.80649e-17
Gh_D08G0931	275.894	1.63724	0.184512	8.87335	7.09758e-19	3.84076e-17
Gh_D04G1090	4594.11	-2.04564	0.230544	-8.8731	7.11366e-19	3.84596e-17
Gh_Sca058812G01	10273	-1.73899	0.195993	-8.87271	7.13847e-19	3.85587e-17
Gh_D05G0356	1185.66	-1.15375	0.13006	-8.8709	7.25562e-19	3.9156e-17
Gh_D12G1496	238.977	-3.00902	0.339414	-8.86534	7.62678e-19	4.10845e-17
Gh_A05G0315	1853.74	1.08802	0.122743	8.86429	7.69941e-19	4.14383e-17
Gh_Sca004964G01	179.562	-3.22565	0.363929	-8.86341	7.76067e-19	4.17302e-17
Gh_D07G1058	308.09	-1.67093	0.188873	-8.84682	9.00465e-19	4.8332e-17
Gh_D01G0303	424.341	1.38841	0.156986	8.84414	9.22383e-19	4.94193e-17
Gh_A06G0669	253.316	-1.74123	0.197171	-8.83107	1.03682e-18	5.55006e-17
Gh_D09G2452	659.279	-1.28351	0.145349	-8.8305	1.04211e-18	5.57339e-17
Gh_D11G0155	184.218	-1.25714	0.14248	-8.82326	1.11176e-18	5.94053e-17
Gh_D04G1049	21789.7	-1.15268	0.130903	-8.80559	1.30168e-18	6.94909e-17
Gh_D08G1811	472.293	-1.20362	0.136721	-8.80347	1.32653e-18	7.07543e-17
Gh_D09G0265	9.64139	-4.54598	0.516685	-8.79836	1.38831e-18	7.39831e-17
Gh_A05G3209	701.678	-1.09904	0.124994	-8.79272	1.4598e-18	7.77234e-17
Gh_A09G0026	248.516	1.56624	0.178219	8.78829	1.51853e-18	8.07778e-17
Gh_D10G1156	737.823	-3.13642	0.35693	-8.78721	1.53314e-18	8.14825e-17
Gh_D03G1033	1186.6	-1.1281	0.128489	-8.77973	1.63868e-18	8.70139e-17
Gh_A12G2024	352.538	-1.79464	0.204553	-8.77347	1.73238e-18	9.19073e-17
Gh_A10G2067	906.775	-1.47474	0.168134	-8.77125	1.76687e-18	9.36533e-17
Gh_A08G0544	458.655	1.30447	0.148776	8.76805	1.81787e-18	9.61853e-17
Gh_A05G1912	1207.5	1.25618	0.143354	8.76277	1.90508e-18	1.0071e-16
Gh_D01G0451	539.545	1.11734	0.127574	8.75837	1.981e-18	1.04454e-16
Gh_D13G0851	499.145	1.03952	0.118689	8.75836	1.98116e-18	1.04454e-16
Gh_A02G0237	1593.77	1.40843	0.160815	8.75813	1.98525e-18	1.04545e-16
Gh_D09G0059	648.312	1.30698	0.149267	8.75598	2.0233e-18	1.06393e-16
Gh_D12G0301	300.619	1.6951	0.193731	8.74973	2.13863e-18	1.12358e-16
Gh_D10G1130	1255.85	1.04628	0.119613	8.74719	2.18722e-18	1.14709e-16
Gh_D05G3310	244.681	1.48543	0.169843	8.74587	2.21312e-18	1.15965e-16
Gh_D07G0951	47.8158	-3.32283	0.379937	-8.74575	2.21541e-18	1.15982e-16
Gh_A05G1455	4162.45	-1.24834	0.142744	-8.7453	2.22433e-18	1.16348e-16
Gh_D02G1861	139.1	-1.88559	0.215866	-8.73501	2.43633e-18	1.27101e-16
Gh_A10G0655	6015.43	-1.20826	0.138428	-8.72846	2.58153e-18	1.34441e-16
Gh_A06G2106	675.462	-1.22841	0.140742	-8.72808	2.59043e-18	1.34786e-16
Gh_A12G1288	1136.12	-1.17329	0.134531	-8.72127	2.75098e-18	1.4289e-16
Gh_A09G2289	519.377	1.89537	0.217343	8.72065	2.76619e-18	1.43555e-16
Gh_A10G1762	963.921	-1.1848	0.135881	-8.7194	2.79669e-18	1.45011e-16
Gh_A12G1330	237.466	2.02592	0.232353	8.71913	2.80348e-18	1.45237e-16
Gh_D12G2529	129.028	1.8	0.206489	8.71716	2.85279e-18	1.47663e-16
Gh_A05G2628	1123.8	1.24718	0.143115	8.71456	2.91884e-18	1.50951e-16
Gh_D01G0912	101.213	2.13567	0.245161	8.71129	3.00425e-18	1.55098e-16
Gh_D06G1752	216.984	1.60075	0.183759	8.71113	3.00856e-18	1.55186e-16
Gh_D08G2355	501.811	1.69515	0.19464	8.70911	3.06258e-18	1.57836e-16
Gh_A06G0605	242.382	1.6687	0.19173	8.70337	3.22185e-18	1.659e-16
Gh_A10G0809	647.779	1.3749	0.158021	8.70079	3.29568e-18	1.69263e-16
Gh_A01G0611	104.836	-3.73755	0.429767	-8.69669	3.41698e-18	1.7519e-16
Gh_D01G0608	936.924	1.04365	0.120044	8.69388	3.50257e-18	1.79424e-16
Gh_A05G3445	1593.94	1.4317	0.164705	8.69248	3.54627e-18	1.81506e-16
Gh_A02G1372	66.5911	-2.61295	0.300661	-8.69068	3.60288e-18	1.84245e-16
Gh_A08G1353	741.168	1.03095	0.118693	8.68591	3.75731e-18	1.91977e-16
Gh_D10G1707	597.061	-3.7725	0.434431	-8.68378	3.82844e-18	1.95444e-16
Gh_A09G1107	2520.76	1.26395	0.145601	8.68089	3.92674e-18	2.0029e-16
Gh_A07G0459	1641.44	1.53754	0.177165	8.67858	4.00731e-18	2.04225e-16
Gh_D10G0259	18826.2	-1.23553	0.142381	-8.67762	4.04124e-18	2.05778e-16
Gh_A05G1784	774.632	-2.15456	0.248337	-8.67595	4.10115e-18	2.08651e-16
Gh_D08G2596	1109.4	-2.12691	0.245278	-8.6714	4.26824e-18	2.16781e-16
Gh_D02G1469	121.475	3.29583	0.380147	8.66988	4.32562e-18	2.19508e-16
Gh_A05G2263	964.119	1.05572	0.12177	8.66975	4.3308e-18	2.19584e-16
Gh_D05G2403	270.414	2.00525	0.231452	8.66379	4.56334e-18	2.30784e-16
Gh_D06G0636	654.222	1.16865	0.134911	8.6624	4.61916e-18	2.33409e-16
Gh_D10G0111	231.801	1.6072	0.185642	8.65751	4.82189e-18	2.43446e-16
Gh_D06G1311	369.841	1.61917	0.187055	8.65613	4.88033e-18	2.46188e-16
Gh_A05G3980	624.896	-1.3517	0.156188	-8.65431	4.95883e-18	2.49883e-16
Gh_D10G2341	79.7632	-3.28135	0.379161	-8.65424	4.96197e-18	2.49883e-16
Gh_A11G2902	1553.79	1.80879	0.209039	8.65287	5.02209e-18	2.52696e-16
Gh_D12G2309	1417.99	1.34568	0.155534	8.65195	5.0626e-18	2.5452e-16
Gh_D05G3936	1739.36	-1.70172	0.196798	-8.64704	5.28544e-18	2.65275e-16
Gh_A10G1656	543.351	-1.46133	0.169	-8.64693	5.29045e-18	2.65302e-16
Gh_D05G3928	494.994	1.01943	0.117937	8.64389	5.433e-18	2.72222e-16
Gh_A07G1103	625.233	-1.32002	0.152739	-8.64232	5.50843e-18	2.75769e-16
Gh_D05G3128	129.496	1.71218	0.198123	8.64203	5.52216e-18	2.75992e-16
Gh_A01G1843	1292.93	-2.1663	0.250749	-8.63933	5.65433e-18	2.82124e-16
Gh_A06G1787	811.804	-1.54034	0.178301	-8.63895	5.67295e-18	2.82816e-16
Gh_D11G1767	188.897	-2.16346	0.250831	-8.62518	6.3991e-18	3.17952e-16
Gh_D11G1017	2246.64	1.76913	0.205238	8.6199	6.70122e-18	3.32686e-16
Gh_A11G2344	1820.88	1.35857	0.157638	8.61833	6.79395e-18	3.37008e-16
Gh_D11G0758	490.911	-1.44076	0.167213	-8.61627	6.91725e-18	3.42269e-16
Gh_D04G1251	2746.98	-1.29769	0.150662	-8.61322	7.10362e-18	3.51198e-16
Gh_D11G2829	647.625	1.15702	0.134385	8.60979	7.31962e-18	3.61277e-16
Gh_D04G0041	390.669	1.36187	0.158332	8.60135	7.87837e-18	3.88212e-16
Gh_D13G1177	930.07	-1.01722	0.118279	-8.60015	7.96133e-18	3.91975e-16
Gh_D05G0933	545.503	1.61767	0.188177	8.59657	8.2137e-18	4.04066e-16
Gh_D11G0644	546.25	1.558	0.181304	8.59329	8.45104e-18	4.15399e-16
Gh_D09G0295	565.774	1.12454	0.130976	8.58585	9.01641e-18	4.42458e-16
Gh_A07G0114	767.54	-1.43173	0.166886	-8.57912	9.55981e-18	4.68738e-16
Gh_A10G1401	243.927	-1.42822	0.166525	-8.57661	9.77133e-18	4.78321e-16
Gh_D05G0203	2666.83	1.02535	0.119588	8.57407	9.98916e-18	4.88582e-16
Gh_D11G1404	221.892	-2.20295	0.256957	-8.57324	1.00612e-17	4.91704e-16
Gh_A08G1278	97.9949	-1.9645	0.229202	-8.57101	1.02582e-17	5.00918e-16
Gh_A05G2618	3382.42	-1.4678	0.171419	-8.56264	1.10315e-17	5.38239e-16
Gh_D08G1061	462.786	1.47667	0.172753	8.54789	1.2536e-17	6.10141e-16
Gh_D05G0387	222.41	-1.81338	0.212282	-8.54228	1.31596e-17	6.39451e-16
Gh_D04G0852	73.5526	2.43153	0.284709	8.54039	1.33769e-17	6.49476e-16
Gh_D12G1035	385.032	-1.97033	0.230746	-8.53895	1.35449e-17	6.57098e-16
Gh_A12G2472	76.6043	-3.05291	0.357678	-8.53538	1.39701e-17	6.77176e-16
Gh_A13G1686	484.753	2.78878	0.32682	8.53307	1.42516e-17	6.89697e-16
Gh_D07G0720	742.162	-1.4899	0.174795	-8.5237	1.54539e-17	7.46666e-16
Gh_A08G1382	880.983	-1.48429	0.174186	-8.52129	1.57792e-17	7.61765e-16
Gh_D06G1972	176.697	1.70034	0.199634	8.51728	1.63346e-17	7.87299e-16
Gh_D12G0965	272.395	-1.2579	0.147697	-8.51673	1.64117e-17	7.90378e-16
Gh_D12G0051	156.769	-2.87588	0.337875	-8.51166	1.71458e-17	8.25063e-16
Gh_A09G1537	17795.6	-1.62934	0.191517	-8.50755	1.7764e-17	8.52743e-16
Gh_A11G1147	1460.28	-1.57	0.184549	-8.50725	1.78104e-17	8.54282e-16
Gh_D07G1834	245.033	-2.05065	0.241107	-8.50514	1.81379e-17	8.69292e-16
Gh_D06G0218	1385.88	-1.02938	0.121066	-8.50266	1.85296e-17	8.85924e-16
Gh_A04G0623	25920.3	1.27728	0.150227	8.50233	1.85816e-17	8.87695e-16
Gh_D05G2298	1841.42	1.02399	0.120447	8.50157	1.8705e-17	8.92876e-16
Gh_A12G0559	551.48	-1.22648	0.144362	-8.49586	1.96475e-17	9.36363e-16
Gh_D11G0787	863.204	1.24943	0.147074	8.49525	1.97509e-17	9.4054e-16
Gh_D05G0486	196.64	1.94541	0.229063	8.49289	2.01553e-17	9.59027e-16
Gh_A12G0251	324.663	1.03288	0.121646	8.49088	2.05074e-17	9.75002e-16
Gh_A01G0993	13023.1	1.01224	0.119225	8.49013	2.06402e-17	9.80452e-16
Gh_A13G0067	4257.31	-1.23893	0.145927	-8.49005	2.0655e-17	9.80452e-16
Gh_D06G0576	2582.24	2.06642	0.243422	8.48908	2.08288e-17	9.87916e-16
Gh_D10G0505	842.56	-1.68347	0.198329	-8.48829	2.09708e-17	9.93861e-16
Gh_A08G0331	518.689	1.75527	0.206918	8.48294	2.19579e-17	1.03981e-15
Gh_A13G2028	251.709	-1.39084	0.163997	-8.48091	2.23434e-17	1.05723e-15
Gh_D06G1444	114.581	-2.35285	0.277466	-8.47977	2.2563e-17	1.06677e-15
Gh_A11G2869	313.226	1.54611	0.182336	8.47945	2.26263e-17	1.06806e-15
Gh_A12G1756	576.63	1.22411	0.144361	8.47948	2.262e-17	1.06806e-15
Gh_D11G1252	1336.62	-1.30689	0.154135	-8.47887	2.27395e-17	1.07256e-15
Gh_D13G2118	536.365	-1.11192	0.131172	-8.47686	2.31363e-17	1.08955e-15
Gh_D11G1004	900.725	-1.35486	0.159907	-8.4728	2.39561e-17	1.12726e-15
Gh_D11G0596	832.655	-1.22361	0.144494	-8.46828	2.49052e-17	1.17007e-15
Gh_D12G0304	915.53	-1.12009	0.132302	-8.46614	2.53654e-17	1.19075e-15
Gh_D13G0670	1321.23	1.43827	0.169957	8.46252	2.61661e-17	1.22544e-15
Gh_A07G1741	1414.71	1.7078	0.201886	8.45921	2.69189e-17	1.25773e-15
Gh_A10G0212	291.543	-1.94356	0.229865	-8.4552	2.78609e-17	1.2997e-15
Gh_D01G1130	549.146	1.06471	0.125935	8.45441	2.80511e-17	1.30653e-15
Gh_A13G0232	268.747	1.33963	0.158523	8.45069	2.89591e-17	1.34776e-15
Gh_A05G3832	944.133	1.11592	0.132074	8.4492	2.93299e-17	1.36396e-15
Gh_A10G0098	400.715	-2.5043	0.29641	-8.44877	2.94396e-17	1.36799e-15
Gh_A01G1844	608.716	-2.22196	0.263191	-8.44238	3.10948e-17	1.44265e-15
Gh_D09G1652	479.93	-1.49242	0.176792	-8.44167	3.12828e-17	1.45024e-15
Gh_D06G0299	76.3315	-2.08859	0.247533	-8.43761	3.23882e-17	1.49915e-15
Gh_A10G1515	403.263	-1.24116	0.147216	-8.43088	3.43074e-17	1.58675e-15
Gh_A08G1493	207.618	-1.45849	0.173205	-8.4206	3.74552e-17	1.72697e-15
Gh_D11G0842	370.037	2.04498	0.242879	8.41975	3.77298e-17	1.73829e-15
Gh_A11G1958	1754.36	-1.05883	0.125818	-8.41559	3.90912e-17	1.79962e-15
Gh_A09G2140	299.784	1.50395	0.178789	8.41186	4.0356e-17	1.85641e-15
Gh_A02G0875	2302.12	1.0149	0.120683	8.40968	4.11124e-17	1.88974e-15
Gh_D08G2763	347.321	-3.73247	0.44409	-8.40476	4.28748e-17	1.96771e-15
Gh_D01G0200	580.704	1.54197	0.183529	8.40177	4.3981e-17	2.01537e-15
Gh_A12G2413	200.217	-1.45421	0.173114	-8.40028	4.45415e-17	2.03948e-15
Gh_A03G1542	1425.81	-1.32796	0.158175	-8.3955	4.63919e-17	2.12095e-15
Gh_A09G0628	89.5444	-3.36643	0.40106	-8.39383	4.70563e-17	2.14755e-15
Gh_D12G1660	727.155	-1.07385	0.127934	-8.3938	4.70657e-17	2.14755e-15
Gh_D07G1889	480.051	1.63352	0.194624	8.39323	4.72975e-17	2.15573e-15
Gh_A01G0441	474.245	1.12054	0.133533	8.39147	4.80081e-17	2.18645e-15
Gh_A07G1436	1197.92	1.175	0.140055	8.38959	4.8786e-17	2.22017e-15
Gh_D07G0556	3173.81	1.09164	0.130171	8.3862	5.02104e-17	2.28325e-15
Gh_D08G1323	442.734	2.87318	0.342624	8.38581	5.03762e-17	2.28904e-15
Gh_A05G1012	210.181	2.08952	0.249285	8.38205	5.20149e-17	2.3599e-15
Gh_D05G0120	1837.82	-1.60854	0.192064	-8.37502	5.52137e-17	2.50121e-15
Gh_A07G1599	1767.36	-1.00684	0.120231	-8.37422	5.55891e-17	2.5163e-15
Gh_A05G1432	27078	1.9993	0.238855	8.37037	5.74391e-17	2.59413e-15
Gh_A11G0723	332.901	1.98462	0.237198	8.36696	5.91224e-17	2.66611e-15
Gh_A12G0036	145.09	-2.12716	0.254265	-8.36592	5.96455e-17	2.68766e-15
Gh_A05G3814	617.062	1.64739	0.19709	8.35856	6.34872e-17	2.85429e-15
Gh_A02G1533	495.281	1.31053	0.156841	8.3558	6.49917e-17	2.91972e-15
Gh_D04G1558	2210.61	1.10947	0.132877	8.34956	6.85151e-17	3.07337e-15
Gh_A09G1477	330.241	1.40601	0.16842	8.34826	6.92773e-17	3.10522e-15
Gh_D05G1598	691.806	-1.88412	0.22585	-8.34233	7.28385e-17	3.26239e-15
Gh_A11G1591	368.758	1.06232	0.127451	8.33509	7.74392e-17	3.46063e-15
Gh_A12G1028	68.8243	-3.44867	0.413852	-8.33311	7.87469e-17	3.51644e-15
Gh_A06G1594	159.154	-2.18508	0.262245	-8.3322	7.93517e-17	3.54079e-15
Gh_D04G1255	432.61	-1.28506	0.154248	-8.33114	8.00656e-17	3.56997e-15
Gh_A05G3041	699.125	1.16514	0.13989	8.329	8.15289e-17	3.62977e-15
Gh_D05G3148	317.678	-1.21979	0.146476	-8.32755	8.25346e-17	3.6718e-15
Gh_A04G0991	223.772	-1.64672	0.197764	-8.32669	8.31338e-17	3.6957e-15
Gh_D08G1710	1469.47	-1.08378	0.130168	-8.326	8.36206e-17	3.71456e-15
Gh_A13G2312	729.717	-1.0578	0.127105	-8.32229	8.62821e-17	3.82994e-15
Gh_D05G2167	4454.99	1.10191	0.132421	8.32127	8.70253e-17	3.86005e-15
Gh_A05G0505	374.141	1.51619	0.182227	8.32036	8.76948e-17	3.88685e-15
Gh_A08G1448	32.5633	-3.27218	0.393379	-8.31813	8.93617e-17	3.9519e-15
Gh_A10G0616	22.2689	-3.4495	0.414695	-8.31817	8.9334e-17	3.9519e-15
Gh_D06G1480	543.726	-1.04445	0.125574	-8.31743	8.98917e-17	3.97239e-15
Gh_A11G1459	9288.74	1.25518	0.150935	8.316	9.09853e-17	4.01773e-15
Gh_A09G0036	1279.5	3.27197	0.393641	8.31209	9.40336e-17	4.14926e-15
Gh_A13G1960	3282.58	2.4543	0.295395	8.30853	9.6895e-17	4.27235e-15
Gh_D07G0467	788.603	-1.06289	0.127931	-8.30833	9.7062e-17	4.27655e-15
Gh_D12G0428	219.228	1.01746	0.122568	8.30117	1.03094e-16	4.53894e-15
Gh_D03G1296	207.701	2.52772	0.304556	8.2997	1.04379e-16	4.58874e-15
Gh_D06G2010	100.41	-1.88153	0.226775	-8.29689	1.06869e-16	4.69127e-15
Gh_D05G2505	135.421	-2.36462	0.28511	-8.29372	1.09758e-16	4.81453e-15
Gh_A05G1454	324.218	1.10038	0.132693	8.2927	1.10711e-16	4.8492e-15
Gh_D05G2447	319.513	1.28824	0.155346	8.29273	1.10679e-16	4.8492e-15
Gh_A05G1547	2211.05	-1.39656	0.168432	-8.29155	1.11785e-16	4.88548e-15
Gh_A01G2049	499.617	3.02956	0.365448	8.28998	1.13271e-16	4.94316e-15
Gh_A08G0720	1183.15	-1.2112	0.146109	-8.28974	1.135e-16	4.94953e-15
Gh_A09G1159	1653.64	-1.07877	0.130249	-8.28233	1.20784e-16	5.25945e-15
Gh_A08G0291	143.231	-3.06461	0.370134	-8.27973	1.23457e-16	5.3719e-15
Gh_D11G2774	667.919	1.0178	0.122956	8.27782	1.25447e-16	5.4545e-15
Gh_A04G0689	498.898	1.24099	0.149996	8.27349	1.30094e-16	5.65246e-15
Gh_A03G1130	225.8	-1.4051	0.169914	-8.26952	1.34504e-16	5.83977e-15
Gh_A07G0616	1516.25	1.28433	0.155372	8.26617	1.38328e-16	6.00142e-15
Gh_D04G1269	5562	-1.19364	0.144424	-8.2648	1.39934e-16	6.06668e-15
Gh_D08G1138	643.945	1.3035	0.15787	8.25683	1.49594e-16	6.48079e-15
Gh_A12G0944	237.289	-2.27083	0.275194	-8.25174	1.56105e-16	6.75301e-15
Gh_A01G1605	2233.45	2.14813	0.260393	8.24954	1.5901e-16	6.86872e-15
Gh_A05G0410	708.764	-1.19926	0.145424	-8.24667	1.62868e-16	7.02514e-15
Gh_A10G0409	914.035	-1.01402	0.122969	-8.24617	1.63554e-16	7.04962e-15
Gh_D10G1898	914.792	1.08107	0.131161	8.24232	1.68898e-16	7.27473e-15
Gh_D10G2163	955.491	-1.00798	0.122301	-8.24176	1.69701e-16	7.30403e-15
Gh_D02G0631	177.95	1.76994	0.214919	8.23538	1.78991e-16	7.69828e-15
Gh_A01G2116	393.416	-1.76202	0.214046	-8.23198	1.84148e-16	7.90868e-15
Gh_A12G1258	1283.48	-1.54995	0.188324	-8.23024	1.86842e-16	8.01856e-15
Gh_A09G0455	393.898	-1.44772	0.175913	-8.22979	1.87538e-16	8.04265e-15
Gh_A06G1229	219.264	-1.2198	0.148225	-8.22938	1.88186e-16	8.06462e-15
Gh_A06G1690	870.217	-1.98559	0.241364	-8.22655	1.92683e-16	8.2514e-15
Gh_A11G2748	329.963	-1.42259	0.172932	-8.22632	1.93055e-16	8.25833e-15
Gh_A10G1443	87.4672	-2.00614	0.243886	-8.22572	1.94024e-16	8.29093e-15
Gh_D12G1495	15980.6	-1.62236	0.197264	-8.22431	1.96312e-16	8.38268e-15
Gh_A03G1748	813.678	-1.18118	0.143646	-8.22291	1.9863e-16	8.47561e-15
Gh_A03G1596	3881.02	1.02032	0.124137	8.21932	2.04661e-16	8.72044e-15
Gh_D07G2187	239.106	1.76288	0.214511	8.2181	2.06761e-16	8.79732e-15
Gh_D08G1405	1156.4	1.43906	0.175189	8.21433	2.13349e-16	9.07115e-15
Gh_A10G1971	5406.92	-1.64466	0.200227	-8.21396	2.14018e-16	9.09309e-15
Gh_D13G1725	629.622	-1.1455	0.139506	-8.21113	2.19109e-16	9.30275e-15
Gh_D12G2388	1436.48	-1.43924	0.175333	-8.20859	2.23793e-16	9.49486e-15
Gh_A06G1548	1123.32	1.02767	0.125306	8.20126	2.37888e-16	1.00713e-14
Gh_D12G1385	922.675	-1.60107	0.19565	-8.18333	2.76102e-16	1.16726e-14
Gh_A06G1148	70.7653	-3.44919	0.42183	-8.17673	2.91652e-16	1.23125e-14
Gh_D05G1979	795.371	-2.06891	0.253078	-8.17498	2.95924e-16	1.2484e-14
Gh_A13G1616	239.977	1.68296	0.205984	8.17032	3.07581e-16	1.29665e-14
Gh_D08G1966	983.694	-1.0798	0.132167	-8.16995	3.08512e-16	1.29966e-14
Gh_D02G1678	4218.24	-1.19039	0.145829	-8.16289	3.271e-16	1.37602e-14
Gh_A08G1504	182.95	-2.83784	0.347684	-8.16212	3.29184e-16	1.3838e-14
Gh_A08G2306	184.362	1.80989	0.221899	8.1564	3.45171e-16	1.44998e-14
Gh_A12G1370	626.835	-1.04246	0.127904	-8.15032	3.62964e-16	1.52258e-14
Gh_A11G1638	379.366	1.42156	0.174425	8.14996	3.64041e-16	1.52602e-14
Gh_A04G1404	1550.71	1.12146	0.13763	8.14837	3.68848e-16	1.544e-14
Gh_D12G0456	761.456	-1.64488	0.201902	-8.14695	3.73224e-16	1.56122e-14
Gh_D04G0387	534.328	-1.31117	0.161113	-8.13818	4.0127e-16	1.67501e-14
Gh_A06G0838	121.501	-2.49903	0.307089	-8.1378	4.02528e-16	1.67908e-14
Gh_D01G1468	1343.15	-1.21319	0.149116	-8.13585	4.09043e-16	1.70506e-14
Gh_A13G1277	793.984	-1.08529	0.1334	-8.13557	4.09995e-16	1.70784e-14
Gh_D07G2245	1381.94	1.20181	0.147751	8.13399	4.15401e-16	1.72914e-14
Gh_D01G1082	892.809	-1.48935	0.183119	-8.13325	4.17918e-16	1.73841e-14
Gh_A11G1500	236.629	-2.19057	0.269344	-8.13299	4.18823e-16	1.73974e-14
Gh_A05G0879	336.728	-1.27824	0.157169	-8.13287	4.19247e-16	1.74028e-14
Gh_A05G2699	102.675	1.70072	0.209153	8.13147	4.24121e-16	1.75929e-14
Gh_A02G1326	10.6033	-4.013	0.493804	-8.1267	4.41123e-16	1.82727e-14
Gh_A07G2212	846.696	1.09271	0.134511	8.12357	4.52653e-16	1.87112e-14
Gh_D13G1724	514.236	1.76223	0.216992	8.12116	4.61767e-16	1.90615e-14
Gh_D01G1992	123.398	2.0618	0.253902	8.12044	4.64482e-16	1.91603e-14
Gh_A13G1409	286.557	2.36554	0.291462	8.11613	4.81267e-16	1.98252e-14
Gh_D09G1560	837.865	-1.0962	0.135267	-8.10396	5.3197e-16	2.18835e-14
Gh_D11G2440	2018.69	-1.61249	0.199059	-8.10054	5.47141e-16	2.24921e-14
Gh_D12G1153	188.361	-1.55771	0.19231	-8.10001	5.49526e-16	2.25746e-14
Gh_D03G0890	803.184	1.04128	0.12861	8.09639	5.66159e-16	2.32418e-14
Gh_D07G0247	69.1601	2.07336	0.256186	8.0932	5.8119e-16	2.38424e-14
Gh_A01G2150	129.045	1.71107	0.211555	8.08806	6.06205e-16	2.48344e-14
Gh_A09G1680	62.8022	-2.49583	0.308608	-8.08739	6.09578e-16	2.49554e-14
Gh_D01G1003	705.222	-1.12095	0.138639	-8.08534	6.19928e-16	2.53617e-14
Gh_D13G2123	435.217	-1.04911	0.129832	-8.08049	6.45046e-16	2.6353e-14
Gh_A03G0585	297.771	1.03416	0.128	8.07937	6.51036e-16	2.65795e-14
Gh_D11G2659	2361.9	1.11183	0.137678	8.07559	6.71525e-16	2.73784e-14
Gh_A12G1243	270.59	1.39964	0.173338	8.07468	6.76548e-16	2.75455e-14
Gh_D03G0085	335.098	-2.30077	0.284936	-8.07469	6.76463e-16	2.75455e-14
Gh_A01G0897	361.44	1.5858	0.196402	8.07428	6.78756e-16	2.76013e-14
Gh_A05G0585	4248.53	-1.13754	0.140899	-8.07339	6.83703e-16	2.77798e-14
Gh_A02G1086	1109.83	-1.18097	0.146319	-8.07117	6.96275e-16	2.82713e-14
Gh_D05G3086	531.165	1.04384	0.129352	8.06974	7.04508e-16	2.85666e-14
Gh_A12G1695	415.179	3.45436	0.428087	8.06928	7.07126e-16	2.86533e-14
Gh_A04G0446	72.5739	3.01396	0.37363	8.06671	7.2217e-16	2.92303e-14
Gh_D01G1448	92.0061	-1.67818	0.208038	-8.06668	7.22348e-16	2.92303e-14
Gh_A01G0876	202.104	1.94953	0.241774	8.06344	7.41791e-16	2.99967e-14
Gh_A10G0259	17541.9	-1.05296	0.130618	-8.06135	7.54557e-16	3.04922e-14
Gh_A11G1499	233.14	-1.36687	0.16963	-8.05795	7.75859e-16	3.13105e-14
Gh_A01G0805	1687.37	1.2079	0.149957	8.05501	7.94741e-16	3.20508e-14
Gh_A08G0505	210.737	1.48737	0.18469	8.05333	8.0569e-16	3.24704e-14
Gh_A06G1538	1206.47	-1.20539	0.149705	-8.05176	8.16146e-16	3.28695e-14
Gh_A05G0493	1393.46	1.0443	0.129719	8.05049	8.2464e-16	3.31891e-14
Gh_D13G0785	53.1872	3.11466	0.387219	8.04365	8.7198e-16	3.50235e-14
Gh_A08G2538	359.909	-1.0455	0.129985	-8.04327	8.7471e-16	3.51093e-14
Gh_D03G0057	225.046	1.7822	0.221738	8.03744	9.17357e-16	3.67963e-14
Gh_D03G1518	535.357	-1.11642	0.138964	-8.03389	9.44284e-16	3.78508e-14
Gh_D10G1472	157.71	1.47677	0.183829	8.0334	9.4809e-16	3.79778e-14
Gh_D10G1678	1716.59	1.12962	0.140629	8.03266	9.53814e-16	3.81814e-14
Gh_D12G2593	240.739	-2.54969	0.317488	-8.03084	9.68062e-16	3.87257e-14
Gh_A11G1122	81.7553	-2.3776	0.296075	-8.03042	9.71391e-16	3.88328e-14
Gh_A07G0297	921.564	-1.25434	0.15624	-8.02826	9.88668e-16	3.9497e-14
Gh_D03G1775	134.228	1.86377	0.232212	8.02617	1.00561e-15	4.012e-14
Gh_Sca120629G01	113.837	-2.73834	0.3412	-8.02562	1.01018e-15	4.02754e-14
Gh_A03G0271	572.232	2.08729	0.260097	8.02506	1.01472e-15	4.04294e-14
Gh_Sca112508G01	45.2283	3.57899	0.446248	8.02019	1.05579e-15	4.20093e-14
Gh_A07G1062	126.455	1.42883	0.178178	8.01913	1.06496e-15	4.23174e-14
Gh_D08G0734	430.631	1.29871	0.161973	8.01804	1.07443e-15	4.26653e-14
Gh_A08G0686	190.581	1.71253	0.21364	8.01594	1.09301e-15	4.33744e-14
Gh_D10G0335	89.5993	2.71987	0.339341	8.01517	1.09988e-15	4.3618e-14
Gh_D02G1559	319.219	-1.17642	0.146788	-8.01439	1.10686e-15	4.38653e-14
Gh_A09G0578	1058.16	-1.56128	0.194854	-8.01257	1.12339e-15	4.44908e-14
Gh_D13G1517	725.574	1.14365	0.142774	8.01022	1.14505e-15	4.52884e-14
Gh_A11G1232	841.029	-1.31551	0.16424	-8.00966	1.15024e-15	4.54637e-14
Gh_D04G1161	123.082	-1.99887	0.249686	-8.00554	1.18939e-15	4.69797e-14
Gh_A12G0179	2125.9	1.20298	0.150479	7.99435	1.30262e-15	5.13501e-14
Gh_A11G1717	596.532	-1.04486	0.130812	-7.98751	1.37692e-15	5.41714e-14
Gh_A03G1709	502.582	-1.34687	0.168643	-7.98651	1.38812e-15	5.45757e-14
Gh_D12G0575	349.264	-1.41839	0.177766	-7.97896	1.47574e-15	5.78679e-14
Gh_D01G1842	135.649	2.30623	0.289047	7.97872	1.47858e-15	5.7941e-14
Gh_D11G0141	1504.95	1.2898	0.161681	7.97743	1.4941e-15	5.84723e-14
Gh_D13G1493	1005.77	1.62587	0.203948	7.97198	1.56147e-15	6.09485e-14
Gh_A12G0100	889.387	-1.25032	0.156875	-7.97016	1.58469e-15	6.18144e-14
Gh_D12G0387	727.157	-1.20276	0.15092	-7.96949	1.59324e-15	6.21073e-14
Gh_A07G0985	248.187	-1.36296	0.171049	-7.96825	1.6094e-15	6.2655e-14
Gh_D13G1392	964.064	1.25083	0.156984	7.96784	1.61467e-15	6.28192e-14
Gh_D07G1331	248.6	1.91624	0.2405	7.96773	1.61616e-15	6.2836e-14
Gh_A06G0921	554.836	-1.16131	0.145754	-7.96757	1.61823e-15	6.28755e-14
Gh_D06G2116	5328.1	1.05135	0.131959	7.96726	1.62237e-15	6.29951e-14
Gh_A05G3404	816.107	1.63814	0.205694	7.96397	1.66605e-15	6.46491e-14
Gh_D02G1862	189.929	-1.49695	0.18803	-7.96125	1.70305e-15	6.60418e-14
Gh_A05G1971	1033.7	-1.0513	0.13213	-7.95657	1.76875e-15	6.85003e-14
Gh_D13G2345	280.195	1.37176	0.17241	7.95643	1.77075e-15	6.85333e-14
Gh_A03G0870	511.24	-3.50474	0.440621	-7.95409	1.80449e-15	6.97934e-14
Gh_A06G1983	645.809	-2.16072	0.271674	-7.95335	1.81542e-15	7.01706e-14
Gh_A07G0547	309.33	-1.49281	0.187879	-7.94561	1.93245e-15	7.45972e-14
Gh_D10G0421	336.896	1.27372	0.160364	7.94265	1.97906e-15	7.63471e-14
Gh_D03G0338	138.081	-1.39461	0.175712	-7.93689	2.07318e-15	7.98744e-14
Gh_D02G0405	356.49	-1.7973	0.226528	-7.9341	2.1202e-15	8.16332e-14
Gh_A12G1909	1651.84	1.3229	0.16679	7.93152	2.16474e-15	8.32943e-14
Gh_D12G0663	1039.49	1.10787	0.139731	7.92863	2.21584e-15	8.52054e-14
Gh_D13G0238	754.32	1.15322	0.145512	7.92526	2.27674e-15	8.74907e-14
Gh_D13G2429	36.9896	-3.15109	0.397679	-7.92371	2.30518e-15	8.85265e-14
Gh_A05G3500	925.031	-1.22351	0.154427	-7.92291	2.32009e-15	8.90415e-14
Gh_D11G1910	159.99	-1.75686	0.221791	-7.92123	2.35171e-15	9.01968e-14
Gh_D03G0895	333.03	-1.98405	0.250538	-7.91916	2.39113e-15	9.16498e-14
Gh_A11G0316	148.448	-1.70954	0.215974	-7.91547	2.46311e-15	9.4348e-14
Gh_A06G0365	355.802	1.49903	0.189398	7.91474	2.4777e-15	9.48458e-14
Gh_A09G0700	407.337	-1.13053	0.142941	-7.90907	2.59309e-15	9.90718e-14
Gh_A10G2338	112.66	1.82447	0.230692	7.90871	2.60078e-15	9.93017e-14
Gh_D11G1796	764.851	1.00273	0.126812	7.90721	2.63215e-15	1.00435e-13
Gh_D08G1046	466.808	1.63311	0.206564	7.90609	2.65606e-15	1.01283e-13
Gh_Sca017508G01	150.724	1.60922	0.203553	7.90563	2.66579e-15	1.01523e-13
Gh_D02G1442	314.007	-2.14039	0.270887	-7.9014	2.75798e-15	1.04967e-13
Gh_D10G0696	408.572	1.19526	0.151381	7.89572	2.88648e-15	1.09788e-13
Gh_A12G0335	593.411	1.06105	0.134384	7.8956	2.88927e-15	1.09824e-13
Gh_A11G0230	1018.14	-2.65509	0.33644	-7.89172	2.98045e-15	1.13217e-13
Gh_A09G1503	761.92	-1.54474	0.195936	-7.88388	3.1736e-15	1.20401e-13
Gh_A05G0660	4281.46	-1.15732	0.14704	-7.87073	3.52571e-15	1.33504e-13
Gh_D12G1633	186.108	-2.50235	0.317941	-7.87048	3.53291e-15	1.33691e-13
Gh_A05G1541	1097.62	-1.11062	0.141263	-7.86207	3.77834e-15	1.42616e-13
Gh_A03G1159	328.578	-1.21805	0.154967	-7.86005	3.83982e-15	1.44753e-13
Gh_D07G2059	534.525	-1.63926	0.208599	-7.85841	3.89043e-15	1.46568e-13
Gh_D04G1299	65.5338	-2.10693	0.268202	-7.85577	3.97329e-15	1.49595e-13
Gh_D03G1087	291.081	1.08919	0.138734	7.85095	4.12882e-15	1.55255e-13
Gh_A06G0779	491.345	1.58738	0.202268	7.84788	4.23118e-15	1.59003e-13
Gh_D12G1478	1878.49	1.31268	0.167277	7.84733	4.24987e-15	1.59605e-13
Gh_A06G0520	1903.77	1.55327	0.198181	7.83766	4.59036e-15	1.72066e-13
Gh_A04G1238	159.997	1.75361	0.223949	7.8304	4.8631e-15	1.82175e-13
Gh_A05G0164	363.079	2.239	0.286153	7.82448	5.0976e-15	1.9072e-13
Gh_A06G2075	820.353	1.22315	0.156337	7.82376	5.12676e-15	1.9169e-13
Gh_D12G2438	829.417	-1.30122	0.166358	-7.82183	5.2059e-15	1.94527e-13
Gh_D12G1670	200.21	1.48244	0.189566	7.8202	5.27405e-15	1.9695e-13
Gh_A10G1371	1769.69	1.34452	0.172071	7.81374	5.55153e-15	2.07052e-13
Gh_A13G1698	5691.02	-1.10935	0.142041	-7.8101	5.71426e-15	2.12721e-13
Gh_A06G1309	2359.28	1.66614	0.213413	7.8071	5.85201e-15	2.17713e-13
Gh_D12G2675	239.772	-1.66117	0.212872	-7.80359	6.01709e-15	2.23435e-13
Gh_A06G0791	1473.76	1.15005	0.147466	7.79874	6.25273e-15	2.31897e-13
Gh_A07G0514	294.096	1.82941	0.234604	7.79786	6.29661e-15	2.33238e-13
Gh_A11G3176	605.224	1.31216	0.168315	7.79584	6.398e-15	2.36842e-13
Gh_A13G0121	1125.83	1.03085	0.132307	7.79139	6.62758e-15	2.45188e-13
Gh_D01G2086	1019.88	-2.08701	0.267946	-7.78893	6.75794e-15	2.497e-13
Gh_A05G0814	569.744	1.596	0.205292	7.77428	7.58768e-15	2.79837e-13
Gh_A13G0495	204.491	-1.37859	0.177387	-7.77167	7.74559e-15	2.85484e-13
Gh_D12G2525	524.655	-1.25893	0.161995	-7.77146	7.75878e-15	2.85793e-13
Gh_A01G0965	1364.51	-1.24505	0.160293	-7.76733	8.01571e-15	2.95074e-13
Gh_D04G0146	2172.04	1.03805	0.133659	7.76638	8.07597e-15	2.97109e-13
Gh_D08G1195	783.999	-1.21929	0.157037	-7.76435	8.20681e-15	3.01736e-13
Gh_D03G1504	243.448	-2.22351	0.286412	-7.76333	8.27287e-15	3.03977e-13
Gh_D09G1522	981.569	1.56944	0.202213	7.76131	8.40574e-15	3.08478e-13
Gh_D13G2048	9394.68	-1.00773	0.129897	-7.75794	8.63178e-15	3.16578e-13
Gh_D10G0295	51.0115	-2.87823	0.371042	-7.75716	8.68536e-15	3.18347e-13
Gh_A10G2273	732.462	-1.56545	0.201875	-7.75452	8.86786e-15	3.24837e-13
Gh_D09G0829	2462.66	-1.12106	0.144629	-7.75127	9.09755e-15	3.33045e-13
Gh_Sca101707G01	32.5485	3.02831	0.390843	7.74816	9.32372e-15	3.41115e-13
Gh_A11G0985	729.734	-1.52931	0.197437	-7.74578	9.50003e-15	3.47139e-13
Gh_A13G1971	4105.14	-1.09076	0.140827	-7.74538	9.52968e-15	3.48009e-13
Gh_A04G1485	552.658	1.25588	0.16215	7.74518	9.54483e-15	3.48348e-13
Gh_D05G3605	683.017	1.44909	0.187112	7.74451	9.59484e-15	3.49959e-13
Gh_A11G2333	1809.57	-1.0702	0.138298	-7.73835	1.00712e-14	3.6666e-13
Gh_A05G3608	829.976	-1.16454	0.150501	-7.73776	1.01183e-14	3.6815e-13
Gh_D10G0425	277.663	-1.5086	0.195002	-7.73633	1.02324e-14	3.71845e-13
Gh_D02G0694	239.658	-1.41289	0.182736	-7.73189	1.05958e-14	3.84816e-13
Gh_D08G0240	264.628	1.86081	0.240682	7.73141	1.06361e-14	3.86047e-13
Gh_A09G0263	10.1291	-4.05399	0.52454	-7.72865	1.08695e-14	3.94276e-13
Gh_A11G1329	54.5027	2.5342	0.327985	7.72657	1.10486e-14	4.00529e-13
Gh_Sca056177G01	113.584	-2.42308	0.313622	-7.72611	1.10882e-14	4.01718e-13
Gh_A05G2784	337.019	1.36924	0.177253	7.72479	1.12042e-14	4.05674e-13
Gh_A07G0882	90.2056	-2.03708	0.26374	-7.72383	1.12881e-14	4.08466e-13
Gh_D12G2372	64.2409	-2.19509	0.284265	-7.72198	1.14534e-14	4.13942e-13
Gh_A12G2702	215.537	-1.10923	0.143664	-7.721	1.1542e-14	4.16893e-13
Gh_A13G0402	208.434	-2.7433	0.355376	-7.71943	1.16854e-14	4.21305e-13
Gh_D11G2017	1523.12	-1.2176	0.157801	-7.71602	1.20016e-14	4.32442e-13
Gh_D13G0763	122.208	1.81452	0.235181	7.71541	1.20591e-14	4.3425e-13
Gh_D07G0523	1262.53	1.76385	0.228639	7.71458	1.21384e-14	4.36314e-13
Gh_A07G1968	133.958	1.73416	0.22488	7.71147	1.24374e-14	4.46523e-13
Gh_D04G0963	348.516	-1.34925	0.175011	-7.70955	1.26267e-14	4.52774e-13
Gh_D08G0322	161.097	1.60487	0.2085	7.6972	1.39076e-14	4.98106e-13
Gh_A07G1227	132.905	2.49527	0.324223	7.69616	1.40221e-14	5.01834e-13
Gh_D11G0606	137.34	1.84541	0.239785	7.6961	1.40286e-14	5.01834e-13
Gh_D04G1805	2323.41	-1.00313	0.130406	-7.69236	1.44443e-14	5.15774e-13
Gh_D05G2938	204.282	1.47856	0.192255	7.69062	1.46426e-14	5.21918e-13
Gh_D08G2395	116	-1.95162	0.253776	-7.69032	1.46771e-14	5.22834e-13
Gh_A05G0993	534.943	-2.06346	0.26852	-7.68457	1.53517e-14	5.45883e-13
Gh_A05G3908	483.884	1.24901	0.162547	7.68403	1.5416e-14	5.47843e-13
Gh_A10G0450	352.067	1.09556	0.142585	7.68355	1.54745e-14	5.49592e-13
Gh_A05G0798	505.085	1.53473	0.199937	7.67607	1.6404e-14	5.8191e-13
Gh_D06G1658	153.029	3.69896	0.481943	7.67511	1.65277e-14	5.85951e-13
Gh_A03G0837	172.065	-1.6628	0.216669	-7.67435	1.66265e-14	5.88402e-13
Gh_A06G1163	202.712	-1.99377	0.259794	-7.67445	1.66132e-14	5.88402e-13
Gh_D04G1427	643.566	1.10889	0.144505	7.67372	1.6708e-14	5.90935e-13
Gh_A09G0690	388.883	-1.14528	0.149368	-7.66752	1.7535e-14	6.19448e-13
Gh_A05G3328	105.259	-2.66672	0.347912	-7.66495	1.78902e-14	6.31246e-13
Gh_A02G1163	122.515	1.88404	0.245827	7.66407	1.80128e-14	6.35195e-13
Gh_D12G2496	315.747	-1.70419	0.22244	-7.66135	1.83992e-14	6.48055e-13
Gh_A05G0063	1222.58	-1.52579	0.199195	-7.65977	1.86267e-14	6.55294e-13
Gh_D03G1708	646.619	1.46018	0.190668	7.65825	1.88477e-14	6.62284e-13
Gh_D11G2913	838.398	1.56613	0.204562	7.65602	1.91782e-14	6.73499e-13
Gh_D03G1219	244.056	1.33424	0.174373	7.65167	1.98392e-14	6.96304e-13
Gh_A09G1066	5794.42	-1.07131	0.140068	-7.64847	2.03385e-14	7.13407e-13
Gh_D12G0180	1710.6	1.42696	0.186585	7.64774	2.04549e-14	7.17065e-13
Gh_A07G1806	617.434	-1.16295	0.152117	-7.6451	2.08789e-14	7.31501e-13
Gh_D02G2150	749.675	-2.85449	0.373383	-7.64493	2.09056e-14	7.32003e-13
Gh_A13G2241	541.254	1.23203	0.161201	7.64278	2.12575e-14	7.43889e-13
Gh_A07G1950	369.524	-1.27021	0.166212	-7.64215	2.13629e-14	7.46697e-13
Gh_D04G0611	785.325	1.01071	0.132253	7.6422	2.13545e-14	7.46697e-13
Gh_A12G0431	251.874	1.22088	0.159803	7.63993	2.17338e-14	7.59216e-13
Gh_D12G1253	146.601	-1.73156	0.226897	-7.6315	2.3204e-14	8.10098e-13
Gh_D04G1325	978.887	1.01262	0.13273	7.6292	2.36218e-14	8.2372e-13
Gh_A02G1637	343.343	-1.98051	0.259839	-7.62208	2.49623e-14	8.6843e-13
Gh_D12G0722	328.268	-1.17255	0.15407	-7.6105	2.73032e-14	9.47653e-13
Gh_D12G2015	1283.92	-1.02859	0.135232	-7.60609	2.8251e-14	9.79408e-13
Gh_D05G0689	1675.67	-1.17235	0.154149	-7.60528	2.84281e-14	9.84971e-13
Gh_A06G1770	1194.34	1.34807	0.177261	7.60498	2.84942e-14	9.86689e-13
Gh_D09G1791	276.851	1.29136	0.169825	7.60408	2.86944e-14	9.93042e-13
Gh_D12G0951	134.382	-1.77389	0.233415	-7.59973	2.96755e-14	1.0264e-12
Gh_D11G0808	393.586	1.04261	0.137215	7.59839	2.99828e-14	1.03642e-12
Gh_A06G1085	869.992	1.43311	0.18862	7.59786	3.01059e-14	1.04008e-12
Gh_A07G0317	156.111	-2.01063	0.264802	-7.59296	3.12674e-14	1.07833e-12
Gh_A05G3807	2699.98	-1.83886	0.242184	-7.59281	3.13043e-14	1.07898e-12
Gh_A04G1402	4033.6	-1.09591	0.144397	-7.58955	3.21028e-14	1.10522e-12
Gh_A02G0227	217.668	-1.63723	0.215736	-7.58904	3.22291e-14	1.10892e-12
Gh_D05G0760	148.556	-1.65417	0.217983	-7.58855	3.23498e-14	1.11243e-12
Gh_A03G2176	1036.52	-1.05091	0.138645	-7.57984	3.45974e-14	1.18561e-12
Gh_A11G2755	290.566	-1.03174	0.136143	-7.57836	3.49948e-14	1.19785e-12
Gh_A01G1609	43.9773	-2.58051	0.340935	-7.56891	3.76371e-14	1.28682e-12
Gh_A05G0069	197.081	-1.49854	0.197991	-7.56872	3.76919e-14	1.28795e-12
Gh_A11G2345	2813.68	1.01021	0.133486	7.56788	3.79359e-14	1.29555e-12
Gh_D03G0351	56.3272	-2.01118	0.265833	-7.56558	3.86148e-14	1.31797e-12
Gh_D11G0658	361.267	1.47002	0.194337	7.56426	3.90086e-14	1.33065e-12
Gh_A08G0094	43.1264	2.22813	0.294596	7.56333	3.92869e-14	1.33938e-12
Gh_D10G1709	958.825	-1.14432	0.151335	-7.56151	3.98412e-14	1.3575e-12
Gh_D12G2401	227.817	-2.07448	0.274412	-7.55973	4.03914e-14	1.37546e-12
Gh_D13G0564	937.45	1.3845	0.183262	7.55476	4.19619e-14	1.42486e-12
Gh_D12G0748	51.5708	2.36921	0.313685	7.55283	4.25895e-14	1.44452e-12
Gh_A05G2668	57.8376	2.36448	0.313064	7.5527	4.26331e-14	1.44518e-12
Gh_D13G0644	29.2153	-3.53267	0.467981	-7.54875	4.3944e-14	1.48877e-12
Gh_A10G0070	364.594	1.73108	0.229323	7.54868	4.39708e-14	1.48883e-12
Gh_D02G2389	1488.56	-1.52131	0.201596	-7.54633	4.47701e-14	1.51503e-12
Gh_A04G0678	361.238	1.26427	0.167551	7.54557	4.50315e-14	1.52301e-12
Gh_A07G1752	308.271	-1.42349	0.188714	-7.54315	4.58765e-14	1.54983e-12
Gh_A04G0879	925.291	-1.107	0.146776	-7.54205	4.62638e-14	1.56203e-12
Gh_D12G0013	463.463	-1.17126	0.155404	-7.53688	4.81362e-14	1.62248e-12
Gh_A01G0974	764.3	1.05205	0.13961	7.53564	4.85945e-14	1.63701e-12
Gh_D07G0683	1307.25	1.30982	0.173852	7.53408	4.91777e-14	1.65571e-12
Gh_A05G0675	151.609	-3.03766	0.403338	-7.53131	5.02356e-14	1.69038e-12
Gh_D09G1080	498.567	-1.58726	0.210809	-7.52937	5.09856e-14	1.71464e-12
Gh_A08G1392	258.392	1.10534	0.146817	7.52872	5.12407e-14	1.72225e-12
Gh_A12G2025	128.233	-1.49887	0.199199	-7.5245	5.29204e-14	1.7777e-12
Gh_A05G3743	1078.96	-1.72828	0.229711	-7.52371	5.32414e-14	1.78647e-12
Gh_D12G1393	1118.24	1.8199	0.241896	7.52349	5.33341e-14	1.78857e-12
Gh_Sca012173G01	774.954	1.4745	0.196016	7.52234	5.38055e-14	1.80336e-12
Gh_A07G0673	970.063	-2.51717	0.334977	-7.51446	5.71465e-14	1.91104e-12
Gh_D07G1203	291.31	-1.5283	0.203436	-7.51245	5.80313e-14	1.93954e-12
Gh_A10G1985	359.626	-1.95618	0.260409	-7.51195	5.82533e-14	1.94586e-12
Gh_D07G1663	75992.3	-1.66994	0.222454	-7.50689	6.05481e-14	2.02138e-12
Gh_D13G1674	205.137	1.3852	0.184578	7.50468	6.15788e-14	2.05349e-12
Gh_A10G1483	789.426	-1.61336	0.214985	-7.50456	6.16372e-14	2.05428e-12
Gh_A10G2220	209.757	-1.44613	0.192753	-7.50249	6.26176e-14	2.08579e-12
Gh_D05G3672	1876.46	-1.67748	0.223683	-7.49939	6.4117e-14	2.13216e-12
Gh_A05G3189	126.022	1.90571	0.254121	7.49922	6.4199e-14	2.13369e-12
Gh_D07G1332	59.4479	3.30624	0.440887	7.49905	6.4282e-14	2.13526e-12
Gh_D11G1301	600.93	-1.87055	0.249467	-7.49818	6.47086e-14	2.14823e-12
Gh_D09G1660	93.8304	-2.07482	0.276843	-7.49457	6.65142e-14	2.20572e-12
Gh_A02G1593	1046.29	-1.3473	0.179784	-7.49397	6.68211e-14	2.21466e-12
Gh_D09G0646	274.074	-1.58427	0.211441	-7.49272	6.74609e-14	2.23338e-12
Gh_A11G0556	502.026	-1.85347	0.247372	-7.49263	6.75059e-14	2.23362e-12
Gh_D11G0991	592.427	-1.07238	0.143133	-7.49219	6.77351e-14	2.23996e-12
Gh_D12G1101	635.698	1.50322	0.200762	7.48757	7.01605e-14	2.31888e-12
Gh_D05G3295	1592.36	1.03006	0.13765	7.48319	7.25382e-14	2.39614e-12
Gh_A07G1865	187.639	-1.41011	0.188445	-7.48289	7.27069e-14	2.40038e-12
Gh_A11G1774	4031.49	-1.0055	0.134385	-7.4822	7.30891e-14	2.41166e-12
Gh_A11G0394	1362.38	-1.06944	0.142948	-7.48133	7.35749e-14	2.42634e-12
Gh_A06G1523	2595.31	-1.67833	0.224375	-7.48004	7.43002e-14	2.4489e-12
Gh_A03G1543	895.336	-1.15928	0.155024	-7.47806	7.54293e-14	2.48337e-12
Gh_D05G3139	1730.59	1.01707	0.136012	7.47778	7.55876e-14	2.4872e-12
Gh_D04G0109	395.914	-1.22522	0.163903	-7.47527	7.70459e-14	2.53379e-12
Gh_D09G1908	549.16	1.02598	0.137296	7.47276	7.85275e-14	2.58109e-12
Gh_D10G1912	444.658	-1.9565	0.261828	-7.47244	7.87237e-14	2.58611e-12
Gh_A02G1065	367.521	1.22514	0.164105	7.46562	8.29068e-14	2.71603e-12
Gh_A09G1854	4565.37	1.06154	0.142221	7.46402	8.39223e-14	2.74778e-12
Gh_D01G0162	529.491	-3.29458	0.441447	-7.46315	8.44769e-14	2.76442e-12
Gh_A06G1093	213.933	-1.85798	0.249022	-7.46114	8.57802e-14	2.80553e-12
Gh_A05G0520	209.037	-1.46562	0.196523	-7.45775	8.80113e-14	2.87575e-12
Gh_A03G1662	205.542	-1.62363	0.217842	-7.45325	9.10712e-14	2.97368e-12
Gh_D12G2202	276.351	-1.28011	0.171818	-7.45038	9.30728e-14	3.03737e-12
Gh_A11G0873	1497.82	1.45667	0.19558	7.44795	9.48013e-14	3.09208e-12
Gh_D05G1711	2568.91	-1.64973	0.221525	-7.44714	9.53866e-14	3.10947e-12
Gh_D05G1605	23683.4	1.27724	0.171527	7.44628	9.60095e-14	3.12806e-12
Gh_A06G1326	133.807	1.35599	0.182177	7.44324	9.82447e-14	3.19913e-12
Gh_Sca005244G01	454.694	-1.2747	0.171343	-7.43943	1.01117e-13	3.28548e-12
Gh_A05G3806	618.791	1.89202	0.254327	7.43932	1.01203e-13	3.28648e-12
Gh_A06G1554	593.788	-1.42969	0.192284	-7.4353	1.04328e-13	3.38611e-12
Gh_D06G1073	142.447	-2.18926	0.294446	-7.43518	1.04423e-13	3.38736e-12
Gh_D02G1552	188.141	1.20921	0.162645	7.43469	1.04815e-13	3.39821e-12
Gh_D13G2019	131.994	-1.6851	0.226677	-7.43391	1.05434e-13	3.41641e-12
Gh_A01G0439	19.0306	-3.39521	0.456831	-7.4321	1.06885e-13	3.46155e-12
Gh_A03G0088	136.794	2.01727	0.271442	7.43169	1.07219e-13	3.47049e-12
Gh_D05G1453	1183.08	1.40507	0.189153	7.42824	1.10049e-13	3.55821e-12
Gh_D11G1052	51.0735	-2.68264	0.361181	-7.42742	1.10738e-13	3.57855e-12
Gh_D13G2503	258.038	-1.4567	0.196158	-7.42616	1.11797e-13	3.61081e-12
Gh_D01G0007	134.762	1.8685	0.251618	7.42594	1.11984e-13	3.61489e-12
Gh_D10G1174	354.046	-1.67764	0.226003	-7.42309	1.14416e-13	3.6894e-12
Gh_D12G2747	406.561	-1.06972	0.144135	-7.42165	1.15671e-13	3.72785e-12
Gh_A02G1575	633.071	1.07194	0.144438	7.42143	1.15863e-13	3.732e-12
Gh_A06G0050	1516.01	-1.06367	0.143359	-7.4196	1.17472e-13	3.78177e-12
Gh_D05G0718	1962.93	-1.67044	0.225266	-7.41539	1.21271e-13	3.89777e-12
Gh_D10G0307	3564.46	1.01619	0.137072	7.41355	1.22958e-13	3.94772e-12
Gh_D09G1487	348.27	1.31117	0.176892	7.41227	1.24156e-13	3.98402e-12
Gh_D10G1422	242.575	1.67883	0.226657	7.40695	1.29241e-13	4.14051e-12
Gh_A05G1338	280.619	-1.93262	0.260956	-7.40592	1.30248e-13	4.16827e-12
Gh_D03G0185	76.4561	-2.48859	0.336055	-7.40531	1.30843e-13	4.18507e-12
Gh_A12G0657	898.227	1.25759	0.169838	7.40464	1.31503e-13	4.20167e-12
Gh_A06G0126	1572.16	-1.13506	0.153408	-7.39894	1.37278e-13	4.38383e-12
Gh_A05G0541	334.393	1.07798	0.145723	7.39746	1.38818e-13	4.43065e-12
Gh_A02G1620	188.543	-1.5499	0.209568	-7.3957	1.40665e-13	4.48719e-12
Gh_A08G1537	106.202	-2.67425	0.361636	-7.39486	1.41553e-13	4.51309e-12
Gh_D13G1084	829.467	1.10797	0.149854	7.39362	1.42889e-13	4.55326e-12
Gh_D08G2747	857.255	1.1555	0.156495	7.38365	1.54013e-13	4.89725e-12
Gh_D12G1765	40.7764	2.66631	0.361482	7.37604	1.63062e-13	5.16839e-12
Gh_D08G0458	855.849	1.15667	0.156891	7.37245	1.67518e-13	5.30682e-12
Gh_A08G2243	409.69	1.00254	0.13601	7.37111	1.69219e-13	5.35499e-12
Gh_D06G0664	1851.82	1.01094	0.137154	7.37085	1.69548e-13	5.36255e-12
Gh_D02G1283	347.327	-2.36905	0.321432	-7.37031	1.70235e-13	5.38143e-12
Gh_D01G0731	54.2162	-2.12785	0.288883	-7.36577	1.76125e-13	5.54995e-12
Gh_A02G1233	46.7547	2.46212	0.334335	7.36423	1.78169e-13	5.60842e-12
Gh_A05G2823	219.907	1.1151	0.151599	7.35557	1.90113e-13	5.97175e-12
Gh_D06G0725	1067.69	-1.4024	0.190664	-7.35533	1.90452e-13	5.97926e-12
Gh_A09G2258	222.672	1.76129	0.23968	7.34851	2.00421e-13	6.28561e-12
Gh_A10G1726	311.558	-1.70012	0.231368	-7.34811	2.01022e-13	6.30113e-12
Gh_A13G1695	236.712	1.29123	0.175753	7.34686	2.02915e-13	6.3571e-12
Gh_A05G3401	219.369	-1.9073	0.259708	-7.34404	2.07243e-13	6.4893e-12
Gh_D02G0189	87.0112	2.57951	0.35126	7.34359	2.07938e-13	6.50764e-12
Gh_A02G0206	1293.98	1.02371	0.139417	7.34276	2.0924e-13	6.54493e-12
Gh_D06G1599	366.068	1.33535	0.182105	7.33286	2.25298e-13	7.02875e-12
Gh_A05G3527	194.055	1.23098	0.167946	7.32962	2.3081e-13	7.18731e-12
Gh_D06G1997	137.316	-2.05193	0.279952	-7.32959	2.30863e-13	7.18731e-12
Gh_D10G2487	71.7747	2.2247	0.303586	7.32805	2.33527e-13	7.26645e-12
Gh_A11G2453	432.846	-1.02649	0.140151	-7.32415	2.40425e-13	7.47327e-12
Gh_A09G0482	1750.09	1.76205	0.240667	7.32152	2.45175e-13	7.609e-12
Gh_A12G0333	411.974	-1.52216	0.207926	-7.32064	2.46786e-13	7.65499e-12
Gh_A05G3018	230.55	-1.52229	0.207989	-7.3191	2.49642e-13	7.73956e-12
Gh_D04G1330	1198.58	-2.00018	0.273408	-7.31571	2.56027e-13	7.93336e-12
Gh_A07G0392	424.116	1.21482	0.166114	7.31319	2.60875e-13	8.07517e-12
Gh_D11G0441	1496.22	-1.02248	0.139818	-7.31295	2.61345e-13	8.08552e-12
Gh_D03G1250	99.4137	-2.01327	0.275353	-7.31161	2.63962e-13	8.16224e-12
Gh_D05G3859	1101.49	-2.37082	0.324339	-7.3097	2.67733e-13	8.27456e-12
Gh_D11G0181	5082.54	1.08103	0.147936	7.30741	2.7235e-13	8.41289e-12
Gh_A12G1497	152.023	2.83013	0.38754	7.3028	2.81835e-13	8.69236e-12
Gh_A06G1728	44.1514	-3.41012	0.466983	-7.30245	2.82564e-13	8.71032e-12
Gh_D09G1061	524.194	-1.24357	0.170348	-7.3002	2.87351e-13	8.85329e-12
Gh_A01G0517	158.625	-1.36751	0.187337	-7.29971	2.88391e-13	8.88074e-12
Gh_D09G1315	737.4	1.04263	0.142846	7.29894	2.90036e-13	8.90835e-12
Gh_A08G1447	31.5234	-3.04265	0.416925	-7.29782	2.92466e-13	8.97373e-12
Gh_D08G1949	2557.49	-1.56444	0.214403	-7.29674	2.94814e-13	9.04112e-12
Gh_D06G0094	93.3753	-2.40258	0.329419	-7.29338	3.02273e-13	9.26033e-12
Gh_D04G1904	64.3441	-2.88718	0.395885	-7.29297	3.03189e-13	9.28362e-12
Gh_D03G1182	281.909	-1.73848	0.238436	-7.29118	3.07262e-13	9.40347e-12
Gh_Sca005252G03	239.636	-1.60363	0.21996	-7.29056	3.08659e-13	9.44139e-12
Gh_D04G1572	174.581	1.39266	0.191253	7.28177	3.29463e-13	1.00468e-11
Gh_D05G1283	768.744	1.75127	0.24053	7.28087	3.31676e-13	1.01091e-11
Gh_D09G2009	40.4524	-2.11722	0.29081	-7.28041	3.32796e-13	1.0138e-11
Gh_A12G2384	164.59	-1.44143	0.198073	-7.27727	3.40653e-13	1.0372e-11
Gh_D06G1593	39400.1	2.05549	0.282629	7.27273	3.52294e-13	1.07155e-11
Gh_A12G0565	177.792	-1.04972	0.144344	-7.27236	3.53261e-13	1.07395e-11
Gh_D08G2462	443.369	1.25737	0.172932	7.27091	3.57066e-13	1.08496e-11
Gh_D05G1919	732.457	-1.1491	0.158089	-7.26867	3.63042e-13	1.10143e-11
Gh_D07G0662	210.956	-1.03894	0.142996	-7.26555	3.71535e-13	1.12605e-11
Gh_A10G2254	808.677	-1.23348	0.169785	-7.26498	3.731e-13	1.13022e-11
Gh_A09G1398	34.559	-3.42255	0.471146	-7.26432	3.74925e-13	1.13517e-11
Gh_D03G1258	283.84	1.48082	0.203869	7.2636	3.76919e-13	1.14063e-11
Gh_D11G1317	260.215	1.26301	0.173994	7.25892	3.90193e-13	1.1796e-11
Gh_D04G0082	178.273	1.20449	0.166037	7.25434	4.03614e-13	1.21893e-11
Gh_D07G0417	491.97	-1.5107	0.208383	-7.24961	4.17968e-13	1.26164e-11
Gh_A03G1853	272.09	-1.11883	0.154351	-7.24858	4.21154e-13	1.26997e-11
Gh_A11G1542	394.108	1.4631	0.20187	7.24773	4.23805e-13	1.27731e-11
Gh_A06G0035	134.403	-1.7011	0.234746	-7.24656	4.27479e-13	1.28774e-11
Gh_A02G0642	296.77	-1.25356	0.173042	-7.24423	4.34912e-13	1.30947e-11
Gh_A02G0052	410.416	-1.26602	0.174792	-7.24301	4.38835e-13	1.31928e-11
Gh_D06G1519	1206.82	-1.51827	0.209707	-7.23995	4.48842e-13	1.34732e-11
Gh_A09G1748	1467.04	1.1815	0.163195	7.23981	4.49305e-13	1.34803e-11
Gh_A03G1505	3023.02	1.21324	0.1678	7.23029	4.81974e-13	1.44168e-11
Gh_D05G0332	9612.04	-1.34377	0.185905	-7.22825	4.8927e-13	1.46204e-11
Gh_D05G2640	615.719	-1.0249	0.141893	-7.22308	5.08228e-13	1.51793e-11
Gh_A08G1463	81.0153	1.78141	0.24668	7.22155	5.13987e-13	1.53359e-11
Gh_D04G0129	69.8623	1.97127	0.273036	7.21979	5.20666e-13	1.55196e-11
Gh_D05G0654	822.505	-1.02838	0.142513	-7.21609	5.35054e-13	1.59325e-11
Gh_A02G1781	2385.5	1.07045	0.14836	7.21518	5.38611e-13	1.60304e-11
Gh_A05G1098	244.823	-1.52675	0.211682	-7.21245	5.49523e-13	1.63388e-11
Gh_A10G1372	114.47	1.68779	0.234042	7.21148	5.53483e-13	1.64402e-11
Gh_A03G0894	385.365	1.84655	0.256064	7.21128	5.54302e-13	1.64563e-11
Gh_D11G2002	103.642	-1.51554	0.210254	-7.20813	5.67254e-13	1.68156e-11
Gh_A06G0107	702.417	1.31728	0.182759	7.20775	5.6883e-13	1.6854e-11
Gh_D05G2265	578.851	-1.86378	0.25863	-7.20633	5.74791e-13	1.70136e-11
Gh_D13G2170	379.902	1.42375	0.19768	7.20229	5.92091e-13	1.74996e-11
Gh_D11G1469	1834.29	-1.3946	0.193881	-7.19308	6.3346e-13	1.86759e-11
Gh_D11G2981	109.748	1.6388	0.227933	7.18983	6.48702e-13	1.91158e-11
Gh_D10G0211	104.708	-1.60464	0.223236	-7.18806	6.57202e-13	1.93567e-11
Gh_A01G2048	3510.1	-1.26989	0.176705	-7.18652	6.64638e-13	1.95661e-11
Gh_D08G1308	101.261	-3.33723	0.464497	-7.18461	6.74016e-13	1.98323e-11
Gh_D05G2541	41.3489	-2.42857	0.338167	-7.18159	6.89071e-13	2.02553e-11
Gh_A08G2502	137.066	1.33183	0.185523	7.17881	7.03209e-13	2.06607e-11
Gh_D13G1963	288.177	-1.91141	0.266354	-7.17618	7.16858e-13	2.10409e-11
Gh_D11G2086	69.7935	-2.55457	0.356212	-7.17148	7.41914e-13	2.17549e-11
Gh_D03G1442	532.663	-1.24579	0.173784	-7.1686	7.57679e-13	2.22062e-11
Gh_A08G2389	1244.97	-1.7563	0.245071	-7.1665	7.6938e-13	2.25381e-11
Gh_A04G1096	757.309	-1.08301	0.151234	-7.16117	7.99935e-13	2.34101e-11
Gh_D08G0169	1330.44	1.17377	0.16393	7.16015	8.05902e-13	2.35731e-11
Gh_A11G2469	1445.34	1.32321	0.184825	7.1593	8.10924e-13	2.37084e-11
Gh_D02G1282	2034.56	-1.11701	0.156052	-7.15796	8.1886e-13	2.39286e-11
Gh_D03G1505	429.141	-1.31103	0.183186	-7.15682	8.2573e-13	2.41176e-11
Gh_D05G1111	684.453	-1.64152	0.229406	-7.15553	8.33476e-13	2.43318e-11
Gh_A07G1742	3616.43	1.48534	0.207661	7.15274	8.50612e-13	2.48199e-11
Gh_D06G0003	228.905	-1.28395	0.179567	-7.15023	8.66297e-13	2.52652e-11
Gh_A02G1622	351.832	1.19919	0.167856	7.14416	9.05466e-13	2.63817e-11
Gh_Sca007080G02	387.61	1.37683	0.192856	7.13915	9.39121e-13	2.73222e-11
Gh_A03G2069	1067.46	1.05028	0.14718	7.13603	9.60653e-13	2.79213e-11
Gh_A04G0116	784.286	1.39963	0.196171	7.13474	9.69722e-13	2.81574e-11
Gh_A04G0748	152.214	-1.8879	0.264726	-7.1315	9.92828e-13	2.88002e-11
Gh_D11G1571	299.569	-1.95522	0.274178	-7.1312	9.95003e-13	2.88493e-11
Gh_D03G1616	638.36	-1.11737	0.15672	-7.12968	1.00599e-12	2.91395e-11
Gh_A11G0779	49.3623	2.31304	0.324479	7.12848	1.01486e-12	2.9382e-11
Gh_D12G1541	191.458	1.34316	0.188541	7.12395	1.04876e-12	3.03046e-11
Gh_D05G1112	307.573	-1.18826	0.166887	-7.12017	1.07792e-12	3.11171e-11
Gh_D09G1419	381.495	-1.73484	0.243712	-7.11839	1.09196e-12	3.1507e-11
Gh_D05G0917	592.43	1.31119	0.184213	7.1178	1.09665e-12	3.16271e-11
Gh_D01G0331	361.767	-2.13925	0.30068	-7.11472	1.12143e-12	3.23261e-11
Gh_D01G0854	11303.5	-1.50769	0.211996	-7.11188	1.14475e-12	3.29663e-11
Gh_A07G2231	1160.94	1.1406	0.160523	7.10552	1.19874e-12	3.44876e-11
Gh_A04G0778	7695.64	-1.03544	0.145813	-7.10114	1.23732e-12	3.55633e-11
Gh_A08G1045	1049.68	2.61713	0.368781	7.09669	1.27776e-12	3.6637e-11
Gh_A07G2091	130.588	-1.35034	0.190347	-7.09407	1.30222e-12	3.73206e-11
Gh_D13G1456	174.629	-1.46493	0.206668	-7.08835	1.35719e-12	3.88585e-11
Gh_A06G0592	335.201	-1.6831	0.23748	-7.08735	1.36709e-12	3.9123e-11
Gh_A01G0894	206.908	1.0936	0.154364	7.08452	1.39524e-12	3.98905e-11
Gh_A07G2088	261.176	-1.08254	0.152803	-7.08456	1.39486e-12	3.98905e-11
Gh_A13G0693	387.091	1.4663	0.206983	7.08417	1.39882e-12	3.99736e-11
Gh_D10G0599	1033	1.02914	0.145281	7.08376	1.40295e-12	4.0053e-11
Gh_D11G1416	591.504	-1.39927	0.197804	-7.07401	1.50518e-12	4.28687e-11
Gh_A10G0169	277.884	1.26332	0.178706	7.06928	1.55735e-12	4.43121e-11
Gh_A10G1528	978.452	-1.17741	0.166554	-7.06922	1.55813e-12	4.43131e-11
Gh_D03G0678	1267.52	1.12692	0.159527	7.06417	1.61579e-12	4.59093e-11
Gh_A08G2509	1681.14	1.21781	0.172632	7.05435	1.73407e-12	4.91995e-11
Gh_D01G1841	446.102	1.31606	0.186583	7.05348	1.74498e-12	4.94853e-11
Gh_A09G1036	704.846	-1.30818	0.185498	-7.05228	1.76004e-12	4.98887e-11
Gh_A04G0514	292.376	-1.08641	0.154067	-7.05151	1.76984e-12	5.01427e-11
Gh_A08G2290	900.508	1.19391	0.169325	7.05101	1.77619e-12	5.02987e-11
Gh_Sca004838G01	490.321	1.13496	0.161012	7.04892	1.80307e-12	5.10112e-11
Gh_A08G2566	809.96	-1.45056	0.205803	-7.04833	1.81081e-12	5.12061e-11
Gh_A04G0272	213.838	1.13418	0.160979	7.04553	1.84763e-12	5.22215e-11
Gh_A09G0926	822.908	-1.03399	0.146759	-7.04546	1.84848e-12	5.22215e-11
Gh_A11G2930	409.463	1.29306	0.183538	7.04518	1.85221e-12	5.2302e-11
Gh_D05G1851	43.4949	-2.23656	0.317691	-7.04005	1.9217e-12	5.42386e-11
Gh_D06G2104	55.6842	2.80099	0.397869	7.03998	1.92269e-12	5.42409e-11
Gh_D05G3478	5138.53	-1.32746	0.188662	-7.03617	1.97603e-12	5.56664e-11
Gh_D11G0156	128.479	-1.89855	0.269865	-7.0352	1.98978e-12	5.60273e-11
Gh_A13G0577	1266.37	-1.02866	0.146237	-7.0342	2.00414e-12	5.64049e-11
Gh_A03G2013	493.011	-1.06873	0.151944	-7.03371	2.01119e-12	5.64698e-11
Gh_D03G1716	59.1182	-1.77235	0.251978	-7.03373	2.01086e-12	5.64698e-11
Gh_D04G0305	762.399	-1.44375	0.205302	-7.03229	2.03169e-12	5.69811e-11
Gh_D05G2504	109.691	-1.95486	0.277985	-7.03225	2.03227e-12	5.69811e-11
Gh_A06G1267	99.3705	1.74062	0.247624	7.02927	2.07616e-12	5.81296e-11
Gh_A07G1080	142.908	1.95587	0.278274	7.02856	2.08671e-12	5.83974e-11
Gh_Sca009965G02	146.039	-1.59552	0.227198	-7.02261	2.17763e-12	6.07333e-11
Gh_A05G3996	725.179	-1.11119	0.158433	-7.01368	2.32135e-12	6.45392e-11
Gh_D07G1178	176.934	1.95778	0.279135	7.01373	2.32055e-12	6.45392e-11
Gh_D06G1595	109.066	1.80707	0.257781	7.01011	2.38129e-12	6.60821e-11
Gh_A05G2958	146.065	-1.49521	0.213353	-7.00815	2.41497e-12	6.69856e-11
Gh_A04G0509	221.253	1.2785	0.182531	7.00427	2.48272e-12	6.87686e-11
Gh_D05G2755	927.54	1.08059	0.154302	7.0031	2.50357e-12	6.9314e-11
Gh_A02G0419	181.532	1.48873	0.212686	6.99969	2.56526e-12	7.0989e-11
Gh_D12G0693	623.282	-1.13585	0.162296	-6.99864	2.58451e-12	7.14552e-11
Gh_D05G1129	94.4894	2.17403	0.310669	6.9979	2.5983e-12	7.1803e-11
Gh_A12G0329	70.2965	1.63374	0.233466	6.99776	2.60084e-12	7.184e-11
Gh_D02G2127	10330.9	-1.13612	0.162399	-6.99585	2.6365e-12	7.27573e-11
Gh_A10G0829	64.0583	-2.50918	0.358726	-6.99469	2.65853e-12	7.33314e-11
Gh_A03G1923	843.818	1.59468	0.227994	6.99439	2.66422e-12	7.34541e-11
Gh_D05G2997	142.987	1.35864	0.194287	6.99295	2.69172e-12	7.41782e-11
Gh_D11G0451	164.862	1.25807	0.179925	6.99217	2.70667e-12	7.45555e-11
Gh_D13G1068	170.699	1.98133	0.283393	6.99146	2.72044e-12	7.49003e-11
Gh_A05G0109	51.0697	2.40351	0.343891	6.98915	2.7655e-12	7.60001e-11
Gh_D02G2130	235.899	-1.48074	0.212091	-6.98162	2.91805e-12	8.00079e-11
Gh_A05G2393	176.01	-1.103	0.15805	-6.97881	2.97692e-12	8.15469e-11
Gh_A12G0991	124.604	-1.4372	0.206068	-6.97437	3.07248e-12	8.40485e-11
Gh_D07G1887	56.8827	2.1724	0.31155	6.97288	3.10528e-12	8.49067e-11
Gh_D04G0716	430.152	1.26289	0.181174	6.97061	3.15564e-12	8.62439e-11
Gh_A07G0595	284.248	-1.01506	0.145677	-6.96789	3.21738e-12	8.78507e-11
Gh_D13G1001	833.172	1.14622	0.164582	6.96445	3.29679e-12	8.99776e-11
Gh_A13G1831	119.735	-1.49893	0.21528	-6.96269	3.33832e-12	9.10693e-11
Gh_A02G1668	517.033	1.29495	0.186006	6.96188	3.35768e-12	9.14719e-11
Gh_D12G2002	419.476	1.90365	0.273592	6.95799	3.45157e-12	9.39006e-11
Gh_D03G0850	205.493	-1.32015	0.18975	-6.95731	3.46819e-12	9.43097e-11
Gh_D01G0668	149.738	-1.58149	0.227323	-6.95704	3.47502e-12	9.44523e-11
Gh_D06G2233	692.67	1.17294	0.168611	6.95647	3.48916e-12	9.47934e-11
Gh_A12G1874	652.381	1.33417	0.191913	6.95193	3.60324e-12	9.78034e-11
Gh_A10G1755	329.825	-1.11145	0.160005	-6.94635	3.74862e-12	1.01703e-10
Gh_D05G0872	644.454	1.12932	0.162581	6.94618	3.75317e-12	1.0178e-10
Gh_D13G1562	529.402	-1.18261	0.170256	-6.94608	3.75569e-12	1.01802e-10
Gh_D06G0411	1986.69	1.48436	0.213715	6.94553	3.77054e-12	1.02158e-10
Gh_A01G1959	1236.66	1.0893	0.156865	6.94422	3.80553e-12	1.02965e-10
Gh_A11G1413	1696.49	1.19678	0.172374	6.94294	3.84034e-12	1.03852e-10
Gh_D10G0802	196.241	-1.43326	0.206436	-6.94288	3.84178e-12	1.03852e-10
Gh_A02G0528	160.123	1.29518	0.18657	6.94205	3.86446e-12	1.0437e-10
Gh_D01G0342	445.129	1.38575	0.199729	6.93814	3.97284e-12	1.072e-10
Gh_D04G1379	382.325	-1.2908	0.186125	-6.93514	4.0581e-12	1.09401e-10
Gh_D05G1709	247.121	-1.27958	0.184709	-6.92757	4.28128e-12	1.15262e-10
Gh_D04G1924	2438.06	-1.37473	0.198512	-6.92515	4.35504e-12	1.17194e-10
Gh_D08G2201	460.122	-1.51512	0.218807	-6.92443	4.37719e-12	1.17693e-10
Gh_D07G0374	79.0619	-1.98763	0.287097	-6.92319	4.41578e-12	1.18668e-10
Gh_D12G2216	215.882	-1.34042	0.193723	-6.91927	4.53987e-12	1.21893e-10
Gh_A10G1552	868.428	1.30306	0.18834	6.91865	4.55979e-12	1.22372e-10
Gh_A08G0932	239.845	1.57845	0.228159	6.9182	4.57432e-12	1.22707e-10
Gh_A04G1174	2045.75	-1.02999	0.148916	-6.91658	4.62662e-12	1.24054e-10
Gh_A11G1149	169.091	-1.67535	0.242237	-6.91615	4.64082e-12	1.24379e-10
Gh_A12G2016	1964.2	-1.48641	0.215028	-6.91264	4.75732e-12	1.27444e-10
Gh_A06G1155	464.431	1.44853	0.20963	6.90993	4.84879e-12	1.29777e-10
Gh_D04G0674	1030.67	1.10186	0.159464	6.90975	4.85494e-12	1.29883e-10
Gh_D01G1091	315.654	-1.20591	0.174568	-6.90798	4.91606e-12	1.314e-10
Gh_D10G0952	525.994	1.38252	0.200162	6.90699	4.9503e-12	1.32256e-10
Gh_D05G1810	2049.19	-1.00107	0.145011	-6.90343	5.07607e-12	1.35555e-10
Gh_D05G1773	752.752	1.66722	0.241527	6.90283	5.09776e-12	1.36074e-10
Gh_Sca081044G01	8105.31	1.12796	0.163443	6.90124	5.1552e-12	1.37545e-10
Gh_D08G1584	134.485	1.87137	0.27117	6.9011	5.16017e-12	1.37616e-10
Gh_D09G1613	122.274	-1.78501	0.258668	-6.9008	5.17113e-12	1.37847e-10
Gh_A05G2738	455.483	1.16522	0.168923	6.89797	5.27521e-12	1.40432e-10
Gh_A10G1848	250.02	-1.13503	0.164553	-6.89767	5.28606e-12	1.40658e-10
Gh_D12G1030	211.766	1.43228	0.207677	6.89666	5.32382e-12	1.416e-10
Gh_D11G1726	101.907	-1.8624	0.270083	-6.89564	5.36244e-12	1.425e-10
Gh_A13G1773	1034.06	-1.1435	0.165902	-6.89264	5.47657e-12	1.45468e-10
Gh_D07G0962	371.96	1.07472	0.155945	6.89171	5.51266e-12	1.46361e-10
Gh_A12G1270	1253.07	1.61739	0.234852	6.88686	5.70363e-12	1.51296e-10
Gh_D10G0640	621.871	1.3929	0.202346	6.88372	5.83089e-12	1.54534e-10
Gh_A06G1409	99.2304	1.59348	0.231506	6.88311	5.85615e-12	1.54996e-10
Gh_A03G0451	142.491	1.15073	0.167198	6.88242	5.8845e-12	1.55678e-10
Gh_Sca004871G02	798.84	1.0083	0.146506	6.88232	5.88858e-12	1.55716e-10
Gh_A08G2058	1001.29	-1.60573	0.233377	-6.88039	5.96887e-12	1.57748e-10
Gh_D11G1125	90.3297	-2.9267	0.425371	-6.88035	5.9707e-12	1.57748e-10
Gh_D04G1682	114.114	1.36246	0.198045	6.87957	6.00353e-12	1.58545e-10
Gh_D04G1266	5888.04	-1.12299	0.163254	-6.87877	6.03726e-12	1.59365e-10
Gh_D12G0898	232.595	1.21089	0.176075	6.87712	6.1076e-12	1.6115e-10
Gh_D04G0953	6049.32	-1.22557	0.178254	-6.87544	6.17981e-12	1.62911e-10
Gh_A03G1706	6819.64	-1.07287	0.156114	-6.87234	6.31555e-12	1.66416e-10
Gh_D09G1360	413.282	-1.30907	0.190509	-6.87142	6.35661e-12	1.67423e-10
Gh_Sca017981G01	267.61	1.01295	0.147432	6.87068	6.38962e-12	1.68218e-10
Gh_D12G1623	301.576	1.9689	0.286653	6.86859	6.48409e-12	1.70479e-10
Gh_A11G0877	370.77	1.19443	0.17398	6.86536	6.63224e-12	1.74144e-10
Gh_A09G0764	35156	1.05717	0.153993	6.86503	6.64765e-12	1.74471e-10
Gh_D12G1369	228.695	1.40906	0.205268	6.86447	6.67368e-12	1.75077e-10
Gh_A07G0490	428.556	-1.18839	0.173126	-6.86428	6.68253e-12	1.75232e-10
Gh_D05G2066	620.75	1.16555	0.169948	6.85826	6.97055e-12	1.82464e-10
Gh_D12G1111	167.134	-1.3405	0.195496	-6.85691	7.03674e-12	1.84115e-10
Gh_A03G1284	395.515	-1.71809	0.250597	-6.85598	7.08243e-12	1.85067e-10
Gh_A05G3321	580.902	1.64836	0.240498	6.85394	7.18409e-12	1.87558e-10
Gh_D07G0974	2641.72	1.11218	0.162391	6.84879	7.44778e-12	1.94187e-10
Gh_A01G1988	651.848	-1.14633	0.167382	-6.84857	7.45927e-12	1.94402e-10
Gh_A10G1465	1395.72	-2.56629	0.37474	-6.84819	7.47889e-12	1.94828e-10
Gh_D07G0614	119.867	-2.18274	0.318817	-6.84638	7.574e-12	1.97219e-10
Gh_A06G0859	651.459	1.01509	0.14827	6.84625	7.58112e-12	1.97318e-10
Gh_D02G0598	1013.47	2.74511	0.401115	6.84371	7.71679e-12	2.00673e-10
Gh_D12G0266	1405.2	1.07748	0.157446	6.8435	7.72818e-12	2.00882e-10
Gh_D04G0644	1783.42	-1.0101	0.147627	-6.84221	7.79817e-12	2.02525e-10
Gh_A02G0341	1093.49	-1.52555	0.223196	-6.83505	8.19783e-12	2.12533e-10
Gh_D05G0905	671.102	-1.26782	0.185493	-6.83486	8.20841e-12	2.12622e-10
Gh_A05G0556	401.005	-1.06022	0.155171	-6.8326	8.33872e-12	2.1581e-10
Gh_A12G2719	422.651	-1.55075	0.226996	-6.8316	8.39706e-12	2.17131e-10
Gh_A03G0353	95.2598	2.46473	0.360853	6.8303	8.47377e-12	2.18924e-10
Gh_A02G0532	1196.64	2.68924	0.394439	6.81788	9.23966e-12	2.38401e-10
Gh_A03G0955	17.7144	-3.36384	0.493681	-6.8138	9.50545e-12	2.44976e-10
Gh_D10G2049	192.037	1.45868	0.214078	6.81378	9.50685e-12	2.44976e-10
Gh_D01G0926	18.6627	-2.61146	0.383361	-6.81203	9.623e-12	2.47755e-10
Gh_A02G0820	256.507	-2.37509	0.348756	-6.81017	9.74831e-12	2.50764e-10
Gh_A13G1685	244.044	1.878	0.275768	6.81007	9.755e-12	2.50828e-10
Gh_D12G2176	273.219	-1.54778	0.227311	-6.80911	9.82038e-12	2.524e-10
Gh_A07G0629	267.039	-1.46674	0.215588	-6.80346	1.02134e-11	2.61936e-10
Gh_D05G0946	212.359	-1.41708	0.208291	-6.80337	1.02196e-11	2.61983e-10
Gh_D07G2265	48.7097	-2.13606	0.314039	-6.80192	1.03236e-11	2.64421e-10
Gh_D07G2351	274.594	-1.06527	0.156625	-6.80137	1.03629e-11	2.65245e-10
Gh_A10G1489	654.736	-1.05564	0.155236	-6.80025	1.04437e-11	2.67151e-10
Gh_Sca013455G01	37.4611	2.67237	0.393197	6.79651	1.07181e-11	2.74054e-10
Gh_A02G0514	154.198	-1.16653	0.171661	-6.79554	1.07911e-11	2.75682e-10
Gh_A12G0827	354.698	-1.69142	0.248939	-6.79452	1.08671e-11	2.77505e-10
Gh_D11G2525	2531.6	1.00401	0.147786	6.79368	1.09308e-11	2.79013e-10
Gh_A06G1664	529.965	1.35983	0.200223	6.79155	1.10935e-11	2.82923e-10
Gh_D09G1857	1291.42	1.1445	0.168751	6.7822	1.18359e-11	3.01082e-10
Gh_A10G1680	184.633	-1.1679	0.172226	-6.78121	1.19176e-11	3.03031e-10
Gh_Sca068518G01	79.4055	1.74505	0.257475	6.77753	1.22245e-11	3.10305e-10
Gh_A11G2571	38.9903	-2.09188	0.308887	-6.77232	1.26736e-11	3.21037e-10
Gh_D02G1691	598.591	1.36406	0.201456	6.77099	1.279e-11	3.23693e-10
Gh_D03G0813	333.991	-1.14812	0.169786	-6.76213	1.35979e-11	3.43847e-10
Gh_D10G1061	75.5452	1.84767	0.273288	6.7609	1.3714e-11	3.46636e-10
Gh_A12G1537	204.25	1.35313	0.200185	6.75942	1.38544e-11	3.49887e-10
Gh_D11G2696	386.771	-1.09268	0.161702	-6.7574	1.40492e-11	3.54655e-10
Gh_D02G1673	635.682	-1.10179	0.163134	-6.7539	1.43918e-11	3.62537e-10
Gh_A03G1771	126.912	-1.58857	0.235235	-6.75313	1.44687e-11	3.64319e-10
Gh_A05G0477	553.087	-1.2393	0.183552	-6.75179	1.46031e-11	3.67391e-10
Gh_D02G0931	583.613	1.35795	0.201139	6.75129	1.46534e-11	3.68501e-10
Gh_A05G1207	250.525	1.95086	0.288999	6.75042	1.4742e-11	3.70417e-10
Gh_D10G0313	388.317	-1.23163	0.182451	-6.75046	1.47375e-11	3.70417e-10
Gh_A01G0313	2739.45	-1.02663	0.152099	-6.74977	1.48083e-11	3.71925e-10
Gh_D09G0912	178.847	-1.81663	0.26921	-6.748	1.49898e-11	3.76326e-10
Gh_A10G0323	97.2134	1.53956	0.228158	6.74779	1.50116e-11	3.76715e-10
Gh_D02G0593	77.6966	1.85831	0.27546	6.74619	1.51779e-11	3.80407e-10
Gh_A13G1722	351.212	1.10736	0.164204	6.74385	1.54246e-11	3.86427e-10
Gh_A11G2457	403.001	1.23149	0.182691	6.74085	1.57458e-11	3.93811e-10
Gh_A12G0707	219.707	-1.65163	0.245108	-6.73838	1.6016e-11	4.00401e-10
Gh_D02G1212	14.563	-3.41805	0.507483	-6.7353	1.63592e-11	4.08466e-10
Gh_D09G2152	388.792	-2.18085	0.323984	-6.73136	1.6808e-11	4.18617e-10
Gh_D03G0862	143.48	1.38643	0.205985	6.73072	1.68824e-11	4.20295e-10
Gh_D13G0688	1425.8	-1.00446	0.149291	-6.72821	1.71763e-11	4.27255e-10
Gh_D10G2417	3026.6	1.44209	0.214381	6.72677	1.73473e-11	4.31327e-10
Gh_D03G1290	374.625	-1.01695	0.151193	-6.72612	1.74248e-11	4.32894e-10
Gh_D02G1153	402.587	-1.66789	0.248225	-6.71928	1.82626e-11	4.52949e-10
Gh_A06G0110	237.974	1.55849	0.232107	6.71456	1.88628e-11	4.67448e-10
Gh_A07G1337	1301.1	1.16825	0.174014	6.71352	1.89982e-11	4.70607e-10
Gh_D13G1029	442.164	1.31144	0.195385	6.71212	1.91822e-11	4.74769e-10
Gh_D04G0539	38.6587	-2.60556	0.388263	-6.71081	1.93553e-11	4.78655e-10
Gh_D07G1943	1036.17	1.09178	0.162689	6.71083	1.93521e-11	4.78655e-10
Gh_D02G0621	32.1181	-2.33615	0.348124	-6.71069	1.93711e-11	4.78848e-10
Gh_A05G2710	476.512	1.12831	0.168148	6.71024	1.94302e-11	4.80109e-10
Gh_D02G0404	67.8938	-2.03484	0.30344	-6.7059	2.00172e-11	4.93998e-10
Gh_D07G0969	686.105	1.0047	0.149842	6.7051	2.01272e-11	4.96506e-10
Gh_D07G1446	1457.4	1.21625	0.181406	6.70457	2.01994e-11	4.98081e-10
Gh_A08G1094	203.833	-1.6945	0.252787	-6.70328	2.03792e-11	5.02099e-10
Gh_A10G0140	242.696	-1.42204	0.212144	-6.70319	2.03917e-11	5.02201e-10
Gh_D03G1520	403.46	-1.04914	0.156522	-6.70282	2.04436e-11	5.0327e-10
Gh_A11G2792	99.7352	-1.69588	0.253279	-6.69571	2.14625e-11	5.27262e-10
Gh_A04G0114	1557.14	-1.34275	0.200748	-6.68874	2.25098e-11	5.51397e-10
Gh_D13G0561	508.79	1.0145	0.151677	6.68857	2.25366e-11	5.51826e-10
Gh_A11G2044	61.5322	1.71669	0.256749	6.68626	2.28939e-11	5.59884e-10
Gh_A10G0780	101.469	1.84304	0.275741	6.68394	2.32602e-11	5.68375e-10
Gh_D02G1973	3163.9	1.19874	0.179376	6.68281	2.34406e-11	5.72548e-10
Gh_A05G3786	265.931	1.68313	0.251903	6.68167	2.36235e-11	5.76306e-10
Gh_A09G1499	146.522	-1.51754	0.227144	-6.68094	2.37419e-11	5.78957e-10
Gh_A13G0918	348.116	1.92161	0.287692	6.67941	2.39913e-11	5.8456e-10
Gh_Sca008153G01	100.435	1.59106	0.238272	6.6775	2.43054e-11	5.91972e-10
Gh_A08G0202	693.139	1.02182	0.153039	6.67687	2.44107e-11	5.94049e-10
Gh_D06G1738	360.495	1.08858	0.163053	6.67619	2.45229e-11	5.96535e-10
Gh_D07G0446	20.4947	-2.86754	0.429632	-6.67441	2.48233e-11	6.02858e-10
Gh_A13G0554	2336.27	-1.0601	0.158873	-6.67259	2.51324e-11	6.10117e-10
Gh_D08G0911	67.0639	2.12711	0.318848	6.67125	2.53635e-11	6.15457e-10
Gh_D01G2081	59.0727	1.81842	0.272715	6.66783	2.59613e-11	6.29213e-10
Gh_D13G1919	621.835	-1.17692	0.176521	-6.66732	2.60521e-11	6.31156e-10
Gh_A06G0579	1092.12	1.06265	0.159385	6.66722	2.60689e-11	6.31307e-10
Gh_A07G1375	140.818	-1.32381	0.198849	-6.65734	2.78824e-11	6.7358e-10
Gh_A01G0775	43340.6	-1.09027	0.163781	-6.65688	2.79696e-11	6.75412e-10
Gh_D05G2834	195.103	-1.08964	0.163871	-6.6494	2.94298e-11	7.09522e-10
Gh_D01G2207	942.12	1.01999	0.1534	6.6492	2.94682e-11	7.10161e-10
Gh_A10G1701	344.53	-1.11837	0.168204	-6.6489	2.9529e-11	7.1105e-10
Gh_A04G0349	794.394	1.07008	0.161082	6.64311	3.07141e-11	7.39286e-10
Gh_A06G1139	3199.07	1.54093	0.232028	6.64114	3.11258e-11	7.48895e-10
Gh_A07G0624	2655.7	1.50832	0.227155	6.64004	3.13605e-11	7.54236e-10
Gh_D08G0498	146.935	1.44442	0.217606	6.63776	3.18488e-11	7.64878e-10
Gh_A07G1284	8488.71	-1.06352	0.160228	-6.63756	3.18909e-11	7.65446e-10
Gh_D09G1525	110.519	-1.89447	0.285645	-6.63225	3.30601e-11	7.92869e-10
Gh_A13G0818	975.047	1.07867	0.162661	6.6314	3.32522e-11	7.97157e-10
Gh_A07G0192	474.489	-1.19054	0.179541	-6.63105	3.33316e-11	7.98416e-10
Gh_D02G1977	163.817	-1.54968	0.233925	-6.62468	3.47999e-11	8.31912e-10
Gh_D11G2414	314.173	-2.2351	0.337567	-6.62121	3.56267e-11	8.51336e-10
Gh_D08G1205	447.017	-1.1044	0.166802	-6.621	3.56767e-11	8.52189e-10
Gh_A06G0583	1622.81	1.63306	0.246756	6.61812	3.63793e-11	8.68275e-10
Gh_D12G0215	30.3783	2.73028	0.412664	6.61623	3.68468e-11	8.7908e-10
Gh_A01G1399	831.861	1.34922	0.20395	6.61545	3.70427e-11	8.834e-10
Gh_D07G1208	973.379	2.42333	0.366471	6.61262	3.77586e-11	8.99753e-10
Gh_D06G1637	1202.96	1.59123	0.240737	6.60984	3.84747e-11	9.15716e-10
Gh_A01G1037	360.28	-1.09287	0.165343	-6.60967	3.85166e-11	9.16348e-10
Gh_A05G0974	249.784	1.29204	0.195545	6.60737	3.91206e-11	9.30344e-10
Gh_D02G0472	256.326	1.57066	0.23775	6.60635	3.93921e-11	9.36053e-10
Gh_D13G0680	3839.16	1.16205	0.175961	6.60404	4.0011e-11	9.49623e-10
Gh_D11G2012	942.963	-1.71933	0.260376	-6.60327	4.02176e-11	9.53006e-10
Gh_A10G0562	66.8313	-2.75204	0.416838	-6.60219	4.05129e-11	9.59621e-10
Gh_D07G0714	277.612	-1.39314	0.211104	-6.5993	4.13098e-11	9.77331e-10
Gh_D07G1700	1310.61	1.31573	0.199472	6.59606	4.22239e-11	9.97371e-10
Gh_D12G0519	183.353	1.25998	0.19104	6.59537	4.24194e-11	1.00159e-09
Gh_A07G0792	379.98	1.02637	0.155784	6.5884	4.44577e-11	1.04764e-09
Gh_D06G1440	28.7596	-3.22297	0.489221	-6.58795	4.45926e-11	1.05041e-09
Gh_D04G0821	96.6749	-2.01951	0.306784	-6.58285	4.61513e-11	1.0854e-09
Gh_A03G0276	419.369	-1.04228	0.158369	-6.58136	4.66151e-11	1.09545e-09
Gh_D06G2148	458.964	1.18123	0.179495	6.58083	4.67844e-11	1.09864e-09
Gh_D05G0327	188.627	1.15955	0.176243	6.57926	4.72781e-11	1.10971e-09
Gh_D11G3210	233.494	-1.36881	0.208256	-6.57272	4.94033e-11	1.15777e-09
Gh_A12G0453	285.302	-1.05589	0.160655	-6.5724	4.95119e-11	1.15986e-09
Gh_D10G1353	614.728	-1.28935	0.196251	-6.56991	5.03462e-11	1.17847e-09
Gh_D06G1219	586.752	1.02597	0.156176	6.5693	5.05538e-11	1.18287e-09
Gh_D03G1068	598.032	-1.18503	0.180453	-6.56699	5.13428e-11	1.19991e-09
Gh_A12G1302	225.941	-1.11595	0.169973	-6.56545	5.18753e-11	1.21141e-09
Gh_D05G2957	1255.04	1.5271	0.232618	6.56485	5.20856e-11	1.21489e-09
Gh_D07G0934	443.046	1.74411	0.265807	6.56157	5.32431e-11	1.2414e-09
Gh_A05G1878	64.4909	-1.73201	0.264063	-6.55908	5.41416e-11	1.26186e-09
Gh_A05G0994	241.843	-1.55982	0.237826	-6.55865	5.42963e-11	1.26497e-09
Gh_A06G0117	811.082	-1.13042	0.172453	-6.55496	5.56573e-11	1.29566e-09
Gh_D02G1910	49.8805	1.73239	0.26431	6.55437	5.58756e-11	1.30023e-09
Gh_Sca177632G01	20.4412	3.08715	0.471128	6.55267	5.65183e-11	1.31416e-09
Gh_A02G0069	160.259	-1.68611	0.257565	-6.54636	5.89579e-11	1.36768e-09
Gh_A07G2302	642.845	1.02536	0.156672	6.54463	5.9642e-11	1.38301e-09
Gh_A08G0935	81.7039	1.70254	0.260207	6.54301	6.02933e-11	1.39648e-09
Gh_A10G1496	108.952	1.58788	0.242682	6.54305	6.02774e-11	1.39648e-09
Gh_D10G2202	1166.11	-2.61985	0.400518	-6.54115	6.10463e-11	1.41227e-09
Gh_A08G0273	389.544	1.00703	0.154064	6.53642	6.30089e-11	1.45429e-09
Gh_A03G1440	20.717	-3.40193	0.520693	-6.53346	6.42677e-11	1.48162e-09
Gh_D05G0976	382.289	1.11698	0.170979	6.53286	6.45238e-11	1.48695e-09
Gh_A12G0155	76.2883	1.66158	0.25436	6.53238	6.47314e-11	1.49115e-09
Gh_D01G2168	125.732	-1.43298	0.21937	-6.53228	6.47773e-11	1.49163e-09
Gh_A10G1777	165.088	1.52103	0.232956	6.52926	6.60975e-11	1.51968e-09
Gh_A04G0058	2569.21	-1.41452	0.216696	-6.52768	6.67945e-11	1.53511e-09
Gh_A02G0645	1840.68	-1.32476	0.202982	-6.52651	6.73184e-11	1.54596e-09
Gh_A10G0443	304.421	-1.51823	0.232928	-6.518	7.12496e-11	1.63498e-09
Gh_D13G1688	77.795	-2.35918	0.362013	-6.51683	7.18084e-11	1.64653e-09
Gh_D01G2085	792.871	-1.80003	0.276413	-6.51212	7.40987e-11	1.69709e-09
Gh_A12G2691	76.2496	1.46257	0.224708	6.50874	7.57821e-11	1.73364e-09
Gh_D06G0752	53.1915	2.12692	0.326874	6.50683	7.6751e-11	1.75446e-09
Gh_D01G2172	6176.8	-1.03096	0.158523	-6.50351	7.84656e-11	1.7909e-09
Gh_D06G1230	108.736	1.35546	0.208489	6.50137	7.95936e-11	1.81595e-09
Gh_A03G0547	43.8113	-2.42334	0.372873	-6.4991	8.08015e-11	1.84069e-09
Gh_A06G0800	282.579	-1.01841	0.156754	-6.49687	8.20089e-11	1.86432e-09
Gh_D02G1690	457.951	1.93078	0.297187	6.49684	8.20271e-11	1.86432e-09
Gh_D05G0747	812.511	-1.34786	0.207461	-6.49695	8.19657e-11	1.86432e-09
Gh_D07G2242	370.172	-1.19132	0.183377	-6.49653	8.2192e-11	1.86664e-09
Gh_A07G1129	241.223	-1.33338	0.205273	-6.49565	8.26753e-11	1.87691e-09
Gh_A06G1049	133.776	1.27237	0.195934	6.49388	8.36513e-11	1.89689e-09
Gh_D10G1861	486.205	1.97952	0.305003	6.49015	8.575e-11	1.943e-09
Gh_D12G0989	969.827	1.22338	0.188527	6.48919	8.6298e-11	1.95393e-09
Gh_A08G2236	852.176	-2.12034	0.326831	-6.48759	8.72213e-11	1.97334e-09
Gh_D03G0418	98.6623	-2.8155	0.43403	-6.48688	8.763e-11	1.98183e-09
Gh_A07G2041	207.906	-1.52791	0.235567	-6.48608	8.81008e-11	1.99172e-09
Gh_D05G1401	100.883	-1.90976	0.294555	-6.48355	8.95905e-11	2.02309e-09
Gh_D11G3433	440.121	-1.18633	0.183149	-6.47742	9.33037e-11	2.10455e-09
Gh_A04G0952	240.38	-1.13909	0.17586	-6.47728	9.33879e-11	2.10565e-09
Gh_D05G1685	770.186	-1.04577	0.161635	-6.46997	9.80198e-11	2.20424e-09
Gh_D01G1012	155.397	-1.01539	0.15702	-6.46664	1.00203e-10	2.25164e-09
Gh_D04G1663	1671.4	-1.65785	0.256407	-6.4657	1.00831e-10	2.26403e-09
Gh_A07G0118	290.583	1.36764	0.211576	6.46406	1.01929e-10	2.28697e-09
Gh_A11G0575	38.5135	2.03258	0.314546	6.46194	1.03372e-10	2.31848e-09
Gh_D11G0464	159.946	1.20777	0.187256	6.44985	1.11965e-10	2.50176e-09
Gh_D05G3110	469.544	1.18685	0.184054	6.44835	1.13072e-10	2.52494e-09
Gh_A03G0978	836.783	-1.25366	0.194454	-6.44709	1.14018e-10	2.54383e-09
Gh_A05G1318	56.2867	1.97201	0.306132	6.44169	1.18154e-10	2.6292e-09
Gh_D07G2130	168.93	-1.34945	0.209549	-6.43976	1.19663e-10	2.66079e-09
Gh_D06G0902	1187.56	1.3553	0.210484	6.43896	1.20292e-10	2.67377e-09
Gh_D08G1043	1207.67	-1.2319	0.191332	-6.43853	1.20634e-10	2.68038e-09
Gh_A11G0959	608.481	-1.38259	0.214804	-6.43653	1.22237e-10	2.71397e-09
Gh_A11G2261	512.236	-1.50989	0.23459	-6.43631	1.22413e-10	2.71686e-09
Gh_A10G1346	3707.55	-1.35645	0.210838	-6.4336	1.24616e-10	2.76267e-09
Gh_D07G0448	606.691	1.20289	0.187001	6.43255	1.25478e-10	2.77868e-09
Gh_A06G1529	529.164	-1.86229	0.289761	-6.42698	1.30164e-10	2.87817e-09
Gh_A13G1907	233.711	-1.28174	0.199438	-6.42679	1.30331e-10	2.88078e-09
Gh_A05G1543	612.246	1.21371	0.1889	6.42513	1.31759e-10	2.91018e-09
[truncated: 4,049 more rows]

## Sheet: 30min
	baseMean	log2FoldChange	lfcSE	stat	pvalue	padj
Gh_D05G2696	380.412	-9.33253	0.393586	-23.7115	2.74e-124	4e-121
Gh_A01G0521	274.383	-7.84716	0.347856	-22.5587	1.1e-112	1.21e-109
Gh_D09G1782	4373.39	-7.71429	0.315974	-24.4143	1.2e-131	2.07e-128
Gh_D04G1509	168.878	-7.55701	0.374922	-20.1562	2.37e-90	1.32e-87
Gh_D02G2049	525.567	-7.55516	0.435812	-17.3358	2.52e-67	6.24e-65
Gh_D12G1184	2027.03	-7.50385	0.323554	-23.1919	5.49e-119	7.11e-116
Gh_A11G0926	1332.03	-7.39447	0.212129	-34.8584	3.18e-266	4.64e-262
Gh_A12G1061	2787.43	-7.25572	0.248631	-29.1827	3.22e-187	2.08e-183
Gh_A03G1631	692.902	-7.14349	0.446743	-15.9901	1.5e-57	2.76e-55
Gh_D01G0808	85.5846	-7.05528	0.450741	-15.6526	3.19e-55	5.48e-53
Gh_A11G0920	843.039	-6.93212	0.346692	-19.995	6.08e-89	3.14e-86
Gh_A09G2368	3278.23	-6.89847	0.401961	-17.162	5.11e-66	1.21e-63
Gh_A05G3028	959.259	-6.82222	0.367977	-18.5398	9.86e-77	3.4e-74
Gh_D12G1185	2892.24	-6.79294	0.175053	-38.8051	0	0
Gh_D01G0534	209.329	-6.79287	0.350552	-19.3776	1.19e-83	5.31e-81
Gh_A09G2004	2072.91	-6.52329	0.260565	-25.0352	2.53e-138	4.92e-135
Gh_D04G0643	327.112	-6.44703	0.296349	-21.7548	6.22e-105	5.03e-102
Gh_A12G1062	4671.14	-6.3609	0.197552	-32.1987	1.84e-227	1.79e-223
Gh_A04G0209	263.016	-6.34353	0.320275	-19.8065	2.61e-87	1.27e-84
Gh_D02G2415	217.364	-6.31016	0.470925	-13.3995	6.09e-41	6.22e-39
Gh_A05G2432	359.458	-6.22011	0.511235	-12.1668	4.67e-34	3.47e-32
Gh_D08G1658	436.754	-6.18316	0.295355	-20.9346	2.59e-97	1.86e-94
Gh_D09G2122	465.663	-6.12355	0.41095	-14.901	3.25e-50	4.77e-48
Gh_D11G3525	817.05	-6.09498	0.375325	-16.2392	2.66e-59	5.14e-57
Gh_D04G0616	1541.31	-6.09159	0.209584	-29.0651	9.91e-186	5.78e-182
Gh_A04G0966	152.022	-5.96197	0.516735	-11.5378	8.51e-31	5.4e-29
Gh_D05G0037	76.9654	-5.92413	0.450793	-13.1416	1.9e-39	1.82e-37
Gh_D09G2205	1705.71	-5.79089	0.246774	-23.4664	9e-122	1.25e-118
Gh_D06G1722	76.2718	-5.68899	0.453911	-12.5333	4.91e-36	4.01e-34
Gh_A01G0782	94.9073	-5.56412	0.446419	-12.4639	1.17e-35	9.43e-34
Gh_A13G0590	396.56	-5.55595	0.309094	-17.975	3.06e-72	9.01e-70
Gh_A05G0572	491.273	-5.5551	0.279841	-19.8509	1.08e-87	5.4e-85
Gh_A10G2089	1188.25	-5.50504	0.287074	-19.1764	5.83e-82	2.36e-79
Gh_A01G0859	485.749	-5.46988	0.188787	-28.9739	1.4e-184	6.82e-181
Gh_D12G1841	862.173	-5.43485	0.212241	-25.607	1.28e-144	2.97e-141
Gh_D11G1798	238.315	-5.38955	0.280246	-19.2315	2.02e-82	8.34e-80
Gh_A02G1244	602.53	-5.38125	0.317006	-16.9752	1.25e-64	2.83e-62
Gh_D11G2210	921.431	-5.32694	0.277579	-19.1907	4.43e-82	1.8e-79
Gh_A01G0033	70.3182	-5.31106	0.379611	-13.9908	1.77e-44	2.08e-42
Gh_D10G2359	698.474	-5.231	0.363979	-14.3717	7.79e-47	1.01e-44
Gh_D12G0554	1060.59	-5.20981	0.235139	-22.1564	9.06e-109	9.26e-106
Gh_D06G2350	2294.95	-5.1836	0.313926	-16.5122	3e-61	6.09e-59
Gh_A10G2003	1888.82	-5.16209	0.226855	-22.7551	1.28e-114	1.55e-111
Gh_A02G0045	47.3705	-5.15333	0.396105	-13.01	1.07e-38	9.99e-37
Gh_A11G1830	1289.47	-5.14461	0.32298	-15.9286	4.01e-57	7.29e-55
Gh_A10G2090	1065.76	-5.08636	0.322214	-15.7857	3.91e-56	6.92e-54
Gh_D11G1068	1325.03	-5.05673	0.175186	-28.8649	3.29e-183	1.37e-179
Gh_D04G0114	664.314	-5.05457	0.294796	-17.146	6.73e-66	1.56e-63
Gh_A11G1640	354.372	-5.02656	0.18736	-26.8283	1.51e-158	4.64e-155
Gh_D10G2360	833.94	-5.00008	0.37896	-13.1942	9.48e-40	9.21e-38
Gh_D01G1883	286.803	-4.97843	0.320213	-15.5473	1.66e-54	2.78e-52
Gh_A08G0736	4499.66	-4.94181	0.231171	-21.3773	2.18e-101	1.69e-98
Gh_A05G0415	3123.89	-4.93484	0.356734	-13.8334	1.6e-43	1.8e-41
Gh_D13G0536	778.142	-4.84968	0.192384	-25.2083	3.25e-140	7.28e-137
Gh_A09G0075	108.852	-4.84869	0.394686	-12.2849	1.09e-34	8.32e-33
Gh_D12G0138	199.739	-4.83343	0.332059	-14.5559	5.36e-48	7.31e-46
Gh_A12G2280	1105.23	-4.83056	0.269677	-17.9124	9.44e-72	2.7e-69
Gh_D03G1253	339.442	-4.81227	0.333706	-14.4207	3.83e-47	5.02e-45
Gh_A08G2395	3172.75	-4.80436	0.257594	-18.6509	1.24e-77	4.47e-75
Gh_A05G2408	712.359	-4.79028	0.354121	-13.5272	1.08e-41	1.14e-39
Gh_A03G0870	511.24	-4.76696	0.444011	-10.7361	6.89e-27	3.49e-25
Gh_A05G2394	187.678	-4.75821	0.314503	-15.1293	1.04e-51	1.6e-49
Gh_A11G0628	482.587	-4.73954	0.250993	-18.8832	1.57e-79	5.9e-77
Gh_D05G3492	228.095	-4.72605	0.359567	-13.1437	1.85e-39	1.77e-37
Gh_D10G2310	1877.2	-4.66558	0.268547	-17.3734	1.31e-67	3.28e-65
Gh_D08G1308	101.261	-4.66116	0.471111	-9.89398	4.42e-23	1.77e-21
Gh_A08G1363	716.009	-4.65022	0.161132	-28.8596	3.83e-183	1.49e-179
Gh_A07G1131	1340.23	-4.63107	0.209143	-22.143	1.22e-108	1.22e-105
Gh_A12G0121	607.864	-4.61038	0.211851	-21.7624	5.27e-105	4.32e-102
Gh_A01G1576	592.685	-4.60729	0.250715	-18.3766	2.02e-75	6.62e-73
Gh_A06G1838	510.808	-4.5512	0.252863	-17.9987	1.99e-72	5.9e-70
Gh_D13G1915	216.837	-4.54815	0.3065	-14.839	8.2e-50	1.18e-47
Gh_A07G0594	16675.4	-4.54526	0.252884	-17.9737	3.13e-72	9.17e-70
Gh_D04G1784	411.799	-4.5179	0.246523	-18.3265	5.09e-75	1.64e-72
Gh_A04G1173	543.339	-4.50216	0.27953	-16.1061	2.31e-58	4.4e-56
Gh_A12G2465	360.206	-4.47229	0.29427	-15.1979	3.65e-52	5.71e-50
Gh_D09G1081	2351.29	-4.45177	0.225547	-19.7377	1.02e-86	4.93e-84
Gh_D03G1822	852.61	-4.44924	0.20458	-21.7481	7.19e-105	5.74e-102
Gh_A02G1326	10.6033	-4.44471	0.491994	-9.03407	1.65e-19	5.1e-18
Gh_D08G0875	3668.89	-4.44021	0.197263	-22.509	3.39e-112	3.65e-109
Gh_A05G3496	1215.38	-4.42628	0.251454	-17.6028	2.35e-69	6.33e-67
Gh_D06G0772	1829.69	-4.42221	0.188778	-23.4255	2.35e-121	3.19e-118
Gh_D08G2763	347.321	-4.40602	0.443257	-9.94012	2.79e-23	1.13e-21
Gh_D12G2691	1076.86	-4.37543	0.245289	-17.8378	3.59e-71	9.98e-69
Gh_D12G2593	240.739	-4.36106	0.326871	-13.3418	1.32e-40	1.33e-38
Gh_D09G1409	1319.23	-4.35491	0.365208	-11.9245	8.83e-33	6.12e-31
Gh_A10G1991	114083	-4.34639	0.252643	-17.2037	2.49e-66	5.95e-64
Gh_D06G0610	1763.45	-4.33946	0.191352	-22.6779	7.41e-114	8.64e-111
Gh_A09G0817	487.486	-4.28292	0.261628	-16.3703	3.12e-60	6.16e-58
Gh_Sca120629G01	113.837	-4.28203	0.358928	-11.93	8.25e-33	5.76e-31
Gh_D05G0533	3144.55	-4.27936	0.37836	-11.3103	1.17e-29	6.91e-28
Gh_D04G2022	401.147	-4.27265	0.324013	-13.1867	1.05e-39	1.01e-37
Gh_A12G0561	576.587	-4.26441	0.146854	-29.0384	2.16e-185	1.14e-181
Gh_A02G0754	1584.89	-4.26144	0.164958	-25.8334	3.74e-147	9.9e-144
Gh_A05G3718	368.595	-4.25221	0.286164	-14.8593	6.05e-50	8.8e-48
Gh_A03G1995	194.703	-4.24289	0.280403	-15.1314	1.01e-51	1.55e-49
Gh_D01G1930	158.109	-4.23192	0.297655	-14.2175	7.13e-46	8.92e-44
Gh_D09G1551	251.268	-4.22519	0.244205	-17.3018	4.56e-67	1.11e-64
Gh_D02G0797	1792.6	-4.22367	0.191549	-22.0501	9.53e-108	8.96e-105
Gh_D13G0644	29.2153	-4.22126	0.474046	-8.90474	5.35e-19	1.57e-17
Gh_A12G0538	1596.83	-4.19725	0.231461	-18.1338	1.73e-73	5.32e-71
Gh_A08G1099	194.442	-4.19515	0.216655	-19.3632	1.58e-83	6.91e-81
Gh_D12G0577	224.184	-4.18875	0.250802	-16.7015	1.28e-62	2.71e-60
Gh_D11G3083	779.369	-4.17631	0.196493	-21.2542	3.02e-100	2.28e-97
Gh_A06G0542	2735.08	-4.17234	0.180709	-23.0887	6.01e-118	7.62e-115
Gh_D10G1707	597.061	-4.17113	0.433221	-9.62816	6.08e-22	2.23e-20
Gh_A10G0616	22.2689	-4.14893	0.423702	-9.79209	1.22e-22	4.73e-21
Gh_D09G0706	18.3851	-4.14554	0.521567	-7.94824	1.89e-15	4.25e-14
Gh_D01G0162	529.491	-4.1447	0.443313	-9.34938	8.82e-21	2.97e-19
Gh_D12G0877	425.208	-4.14228	0.277884	-14.9065	2.99e-50	4.41e-48
Gh_A09G1073	2687.28	-4.14208	0.218718	-18.938	5.55e-80	2.12e-77
Gh_A05G0856	268.185	-4.12921	0.270105	-15.2874	9.27e-53	1.49e-50
Gh_D05G0190	684.324	-4.10867	0.257376	-15.9637	2.29e-57	4.2e-55
Gh_A09G1405	1437.66	-4.10349	0.323704	-12.6767	7.97e-37	6.81e-35
Gh_A06G0675	369.305	-4.10262	0.266508	-15.394	1.8e-53	2.94e-51
Gh_A07G2185	401.822	-4.09258	0.508246	-8.05236	8.12e-16	1.88e-14
Gh_D07G0661	21391.9	-4.07554	0.214937	-18.9615	3.55e-80	1.36e-77
Gh_D09G1402	24.4362	-4.06669	0.496432	-8.19185	2.57e-16	6.23e-15
Gh_D05G2235	1455.45	-4.0585	0.169483	-23.9464	1.01e-126	1.51e-123
Gh_A11G0230	1018.14	-4.04908	0.338293	-11.9692	5.15e-33	3.61e-31
Gh_A09G1398	34.559	-4.03223	0.472938	-8.52593	1.52e-17	4.01e-16
Gh_D13G0627	9.59371	-4.03018	0.52575	-7.66558	1.78e-14	3.64e-13
Gh_A10G1020	62.8301	-4.02824	0.309783	-13.0034	1.17e-38	1.09e-36
Gh_A09G0263	10.1291	-4.02391	0.524685	-7.66919	1.73e-14	3.55e-13
Gh_D10G1156	737.823	-4.02274	0.358595	-11.2181	3.32e-29	1.92e-27
Gh_D05G2659	182.7	-4.0092	0.338623	-11.8397	2.43e-32	1.65e-30
Gh_D05G0701	345.321	-4.00706	0.280702	-14.2751	3.13e-46	3.95e-44
Gh_A11G1352	80.5939	-3.97692	0.34406	-11.5588	6.66e-31	4.25e-29
Gh_D08G0269	2451.01	-3.9722	0.163757	-24.2567	5.62e-130	9.09e-127
Gh_D06G0066	202.854	-3.96145	0.284109	-13.9434	3.45e-44	4.02e-42
Gh_D02G1253	1615.11	-3.95645	0.360712	-10.9684	5.42e-28	2.94e-26
Gh_A04G0218	15100.5	-3.95084	0.254544	-15.5213	2.49e-54	4.14e-52
Gh_A11G2024	1390.27	-3.94313	0.203688	-19.3586	1.72e-83	7.5e-81
Gh_A01G0611	104.836	-3.93765	0.427731	-9.2059	3.39e-20	1.1e-18
Gh_A10G2091	1175.78	-3.92953	0.233805	-16.8069	2.17e-63	4.71e-61
Gh_D08G2762	1225.65	-3.92153	0.201873	-19.4257	4.68e-84	2.11e-81
Gh_A03G0325	78.4312	-3.9204	0.353189	-11.1	1.25e-28	7.04e-27
Gh_D10G2202	1166.11	-3.91776	0.400745	-9.77619	1.42e-22	5.49e-21
Gh_A06G1148	70.7653	-3.91642	0.425094	-9.21308	3.17e-20	1.03e-18
Gh_A03G0794	78.7323	-3.90993	0.394016	-9.92326	3.3e-23	1.33e-21
Gh_A01G1440	196.715	-3.9088	0.324968	-12.0283	2.52e-33	1.8e-31
Gh_A10G1862	1061.52	-3.90792	0.252618	-15.4697	5.56e-54	9.2e-52
Gh_A13G1003	24.1941	-3.90377	0.525467	-7.42914	1.09e-13	2.08e-12
Gh_A11G0142	134.038	-3.902	0.308069	-12.666	9.13e-37	7.79e-35
Gh_D05G3484	8049.5	-3.8883	0.157242	-24.728	5.34e-135	9.44e-132
Gh_D04G1229	107.237	-3.84591	0.334204	-11.5077	1.21e-30	7.58e-29
Gh_D13G2542	137.981	-3.83615	0.296466	-12.9396	2.69e-38	2.46e-36
Gh_D09G1515	307.429	-3.82852	0.253857	-15.0814	2.15e-51	3.27e-49
Gh_A09G2314	2719.8	-3.81253	0.222194	-17.1586	5.42e-66	1.27e-63
Gh_D10G2299	133497	-3.80795	0.220065	-17.3037	4.41e-67	1.08e-64
Gh_A01G0519	2056.12	-3.80684	0.182207	-20.893	6.2e-97	4.41e-94
Gh_D04G0791	300.146	-3.80545	0.358488	-10.6153	2.53e-26	1.24e-24
Gh_D05G2766	112.827	-3.79624	0.499332	-7.60264	2.9e-14	5.81e-13
Gh_D11G0738	289.584	-3.79399	0.228598	-16.5967	7.36e-62	1.53e-59
Gh_D03G0439	694.823	-3.79261	0.216926	-17.4835	1.91e-68	5.07e-66
Gh_D09G1641	707.16	-3.78482	0.234895	-16.1128	2.07e-58	3.96e-56
Gh_D11G1052	51.0735	-3.78228	0.370804	-10.2002	1.98e-24	8.71e-23
Gh_D06G1440	28.7596	-3.77413	0.496069	-7.60808	2.78e-14	5.59e-13
Gh_D02G1898	83.8678	-3.7617	0.395442	-9.51264	1.86e-21	6.64e-20
Gh_A03G0281	666.687	-3.74321	0.187892	-19.9222	2.61e-88	1.31e-85
Gh_A08G0192	2178.41	-3.74197	0.169347	-22.0965	3.41e-108	3.26e-105
Gh_A06G0093	238.776	-3.73952	0.267646	-13.9719	2.31e-44	2.71e-42
Gh_A12G0944	237.289	-3.739	0.284979	-13.1203	2.52e-39	2.39e-37
Gh_A13G0947	3367.41	-3.73008	0.201821	-18.4822	2.87e-76	9.74e-74
Gh_A05G3730	7297.88	-3.72634	0.200367	-18.5975	3.36e-77	1.18e-74
Gh_D11G0244	1304.54	-3.72293	0.268436	-13.869	9.77e-44	1.11e-41
Gh_A03G1613	144.401	-3.71047	0.352791	-10.5175	7.18e-26	3.42e-24
Gh_D04G2025	46.5959	-3.70095	0.506832	-7.30212	2.83e-13	5.18e-12
Gh_A10G0301	200.735	-3.69953	0.425017	-8.70444	3.19e-18	8.85e-17
Gh_D03G0418	98.6623	-3.69268	0.436192	-8.46572	2.55e-17	6.6e-16
Gh_Sca008309G01	584.596	-3.6926	0.187267	-19.7184	1.5e-86	7.17e-84
Gh_A09G0628	89.5444	-3.68405	0.398053	-9.25518	2.14e-20	7.03e-19
Gh_Sca004987G01	6465.52	-3.67241	0.198684	-18.4837	2.79e-76	9.52e-74
Gh_D04G1701	35.0419	-3.67045	0.424682	-8.64282	5.48e-18	1.49e-16
Gh_D04G1033	113.923	-3.65878	0.264509	-13.8323	1.63e-43	1.82e-41
Gh_A12G0862	675.666	-3.64903	0.146823	-24.8533	2.38e-136	4.33e-133
Gh_A01G1348	689.921	-3.64832	0.161421	-22.6012	4.22e-113	4.82e-110
Gh_A03G1426	569.169	-3.63449	0.200478	-18.1291	1.88e-73	5.76e-71
Gh_D10G2162	389.548	-3.63293	0.179171	-20.2763	2.08e-91	1.19e-88
Gh_D10G2361	1986.75	-3.62264	0.240953	-15.0346	4.35e-51	6.58e-49
Gh_D05G1113	1904.54	-3.61521	0.177293	-20.3911	2e-92	1.22e-89
Gh_D13G1689	203.213	-3.61206	0.369113	-9.78579	1.3e-22	5.01e-21
Gh_A03G1439	27.4061	-3.61184	0.504098	-7.16496	7.78e-13	1.35e-11
Gh_A04G1277	198.479	-3.60859	0.380039	-9.49533	2.2e-21	7.8e-20
Gh_Sca078461G01	30.7354	-3.60467	0.480932	-7.49517	6.62e-14	1.29e-12
Gh_D03G0780	645.404	-3.60456	0.263983	-13.6545	1.9e-42	2.06e-40
Gh_D13G1050	1782.72	-3.59336	0.29973	-11.9887	4.07e-33	2.87e-31
Gh_A02G0495	756.45	-3.58713	0.214992	-16.6849	1.69e-62	3.56e-60
Gh_A09G0057	483.66	-3.58538	0.199774	-17.9472	5.05e-72	1.46e-69
Gh_A01G0096	317.082	-3.58513	0.255102	-14.0537	7.31e-45	8.74e-43
Gh_A05G0675	151.609	-3.58384	0.405792	-8.83173	1.03e-18	2.96e-17
Gh_A01G0139	1241.74	-3.57786	0.197256	-18.1381	1.59e-73	4.94e-71
Gh_D01G0183	1501.53	-3.57714	0.154181	-23.2009	4.46e-119	5.91e-116
Gh_D10G2341	79.7632	-3.565	0.382081	-9.33048	1.05e-20	3.53e-19
Gh_D13G1051	3120.84	-3.56338	0.297932	-11.9604	5.73e-33	4e-31
Gh_A07G0235	10703.5	-3.56315	0.210376	-16.937	2.4e-64	5.32e-62
Gh_A05G0128	816.056	-3.55872	0.230723	-15.4242	1.13e-53	1.85e-51
Gh_A05G2022	856.655	-3.54057	0.236264	-14.9857	9.11e-51	1.37e-48
Gh_Sca006201G01	69.4503	-3.53898	0.475195	-7.44742	9.52e-14	1.82e-12
Gh_Sca004964G01	179.562	-3.53875	0.361073	-9.80064	1.12e-22	4.36e-21
Gh_D01G0544	559.237	-3.53524	0.2846	-12.4218	1.99e-35	1.58e-33
Gh_D09G0265	9.64139	-3.53104	0.521264	-6.774	1.25e-11	1.91e-10
Gh_A01G1843	1292.93	-3.5257	0.252653	-13.9547	2.95e-44	3.43e-42
Gh_A12G1509	135.42	-3.51897	0.315256	-11.1622	6.24e-29	3.53e-27
Gh_A02G1806	488.337	-3.5161	0.199515	-17.6232	1.63e-69	4.45e-67
Gh_A12G0916	803.197	-3.50934	0.384277	-9.13232	6.7e-20	2.13e-18
Gh_A05G0623	9.42422	-3.50869	0.50465	-6.95271	3.58e-12	5.77e-11
Gh_A12G1940	1243.17	-3.49939	0.221125	-15.8254	2.08e-56	3.72e-54
Gh_D05G0820	159.382	-3.49675	0.300902	-11.6209	3.23e-31	2.08e-29
Gh_D11G1131	137.663	-3.49235	0.370496	-9.42614	4.25e-21	1.48e-19
Gh_A10G1223	4326.96	-3.49131	0.176021	-19.8346	1.5e-87	7.39e-85
Gh_D02G2027	184.014	-3.49039	0.31922	-10.9341	7.92e-28	4.25e-26
Gh_D02G1456	872.861	-3.48791	0.194505	-17.9323	6.6e-72	1.9e-69
Gh_A02G0820	256.507	-3.48327	0.352962	-9.86869	5.69e-23	2.26e-21
Gh_A07G1725	10387.5	-3.47783	0.172755	-20.1315	3.91e-90	2.11e-87
Gh_A01G0683	30.7543	-3.47322	0.472835	-7.34551	2.05e-13	3.8e-12
Gh_A10G1894	409.327	-3.47285	0.230227	-15.0845	2.05e-51	3.13e-49
Gh_D04G1398	198.978	-3.46658	0.266784	-12.994	1.32e-38	1.23e-36
Gh_D08G1379	299.225	-3.46641	0.201216	-17.2273	1.66e-66	3.98e-64
Gh_A01G1844	608.716	-3.46475	0.266202	-13.0155	9.99e-39	9.33e-37
Gh_Sca056177G01	113.584	-3.45797	0.321553	-10.754	5.68e-27	2.91e-25
Gh_A12G1170	82.8139	-3.45485	0.370889	-9.31504	1.22e-20	4.07e-19
Gh_A07G2086	256.322	-3.45202	0.248408	-13.8966	6.65e-44	7.67e-42
Gh_A03G1882	2493.82	-3.44549	0.175516	-19.6306	8.47e-86	3.95e-83
Gh_A09G1504	479.991	-3.43891	0.197825	-17.3836	1.1e-67	2.77e-65
Gh_D03G1717	513.322	-3.42909	0.189461	-18.0992	3.24e-73	9.88e-71
Gh_A07G0744	304.02	-3.42785	0.216246	-15.8517	1.37e-56	2.47e-54
Gh_D05G2807	337.125	-3.41827	0.346859	-9.85491	6.53e-23	2.58e-21
Gh_A09G1143	18915.6	-3.41772	0.17375	-19.6703	3.87e-86	1.84e-83
Gh_D07G0161	765.972	-3.41292	0.360178	-9.47564	2.65e-21	9.36e-20
Gh_A03G2127	1031.67	-3.41018	0.213242	-15.992	1.45e-57	2.69e-55
Gh_D07G1929	1335.38	-3.40894	0.249509	-13.6626	1.7e-42	1.85e-40
Gh_D02G1212	14.563	-3.40665	0.506345	-6.72793	1.72e-11	2.57e-10
Gh_A02G0283	1898.63	-3.40469	0.267341	-12.7354	3.76e-37	3.26e-35
Gh_A11G0959	608.481	-3.40402	0.217481	-15.652	3.22e-55	5.52e-53
Gh_D12G0966	6.66786	-3.40073	0.532179	-6.3902	1.66e-10	2.22e-09
Gh_D12G1886	1582.76	-3.39394	0.152885	-22.1994	3.48e-109	3.62e-106
Gh_A09G1442	4195.49	-3.39098	0.252147	-13.4484	3.15e-41	3.26e-39
Gh_D07G1231	739.795	-3.38542	0.176174	-19.2163	2.7e-82	1.11e-79
Gh_D07G1063	580.963	-3.38395	0.165563	-20.439	7.53e-93	4.67e-90
Gh_A08G2526	1873.76	-3.38361	0.194285	-17.4157	6.27e-68	1.62e-65
Gh_A11G2754	643.55	-3.37955	0.163971	-20.6106	2.2e-94	1.43e-91
Gh_A10G1465	1395.72	-3.37192	0.374668	-8.99976	2.26e-19	6.88e-18
Gh_A09G1533	157.616	-3.37145	0.205658	-16.3935	2.13e-60	4.24e-58
Gh_Sca113630G01	50.4437	-3.36911	0.43769	-7.69746	1.39e-14	2.88e-13
Gh_Sca090765G01	91.3655	-3.36639	0.471155	-7.14497	9e-13	1.56e-11
Gh_A04G0217	4579	-3.35442	0.229754	-14.6	2.81e-48	3.86e-46
Gh_A01G1575	31.8518	-3.35282	0.441613	-7.5922	3.15e-14	6.28e-13
Gh_A01G1609	43.9773	-3.34638	0.360771	-9.27564	1.77e-20	5.84e-19
Gh_D11G0646	20.8003	-3.33998	0.482008	-6.92931	4.23e-12	6.75e-11
Gh_A05G3328	105.259	-3.33714	0.350314	-9.52612	1.63e-21	5.86e-20
Gh_D09G1931	3260.72	-3.33663	0.211927	-15.7442	7.52e-56	1.32e-53
Gh_A08G2100	295.673	-3.3363	0.184462	-18.0867	4.06e-73	1.23e-70
Gh_D07G0806	232.163	-3.3349	0.193368	-17.2464	1.19e-66	2.88e-64
Gh_D09G1451	4111.22	-3.33391	0.217529	-15.3263	5.11e-53	8.27e-51
Gh_A02G0971	1138.7	-3.32781	0.20099	-16.5571	1.42e-61	2.94e-59
Gh_A05G0995	1661.78	-3.31866	0.16512	-20.0985	7.61e-90	4.07e-87
Gh_A01G1701	775.717	-3.31746	0.194272	-17.0764	2.23e-65	5.07e-63
Gh_D11G1303	344.234	-3.31578	0.200536	-16.5346	2.07e-61	4.26e-59
Gh_A07G0818	4436.58	-3.31369	0.185414	-17.8718	1.95e-71	5.45e-69
Gh_D07G0614	119.867	-3.30942	0.325162	-10.1778	2.49e-24	1.09e-22
Gh_D07G2304	336.914	-3.3053	0.224836	-14.7009	6.36e-49	8.95e-47
Gh_Sca004961G01	45.9479	-3.30258	0.350439	-9.42413	4.34e-21	1.5e-19
Gh_D02G0348	1760.62	-3.30124	0.270758	-12.1926	3.4e-34	2.54e-32
Gh_D04G0529	974.412	-3.30083	0.150165	-21.9814	4.34e-107	3.96e-104
Gh_D04G1832	2958.69	-3.29462	0.12781	-25.7775	1.59e-146	3.85e-143
Gh_A03G1802	60.6905	-3.28899	0.502794	-6.54143	6.09e-11	8.59e-10
Gh_A05G0993	534.943	-3.28855	0.271126	-12.1292	7.4e-34	5.42e-32
Gh_D08G2395	116	-3.2844	0.263928	-12.4443	1.5e-35	1.2e-33
Gh_D12G0543	1041.74	-3.28424	0.158657	-20.7003	3.44e-95	2.33e-92
Gh_D11G2302	1686.22	-3.2794	0.220771	-14.8543	6.52e-50	9.46e-48
Gh_Sca043730G01	258.93	-3.27656	0.316043	-10.3674	3.49e-25	1.6e-23
Gh_A03G0584	37.4187	-3.27124	0.463524	-7.05733	1.7e-12	2.84e-11
Gh_D01G2086	1019.88	-3.26757	0.269885	-12.1073	9.67e-34	7.05e-32
Gh_D04G1442	81.1038	-3.26645	0.533654	-6.12092	9.3e-10	1.13e-08
Gh_A08G0291	143.231	-3.26624	0.369888	-8.83034	1.04e-18	3e-17
Gh_D13G2429	36.9896	-3.2657	0.405024	-8.06296	7.45e-16	1.73e-14
Gh_A11G2287	625.597	-3.26021	0.178742	-18.2397	2.5e-74	8e-72
Gh_A03G0508	10.8334	-3.2597	0.454373	-7.17406	7.28e-13	1.27e-11
Gh_D03G0982	27.2352	-3.25563	0.456088	-7.13817	9.46e-13	1.63e-11
Gh_D12G0943	676.099	-3.25329	0.162497	-20.0206	3.64e-89	1.91e-86
Gh_D10G2127	1791.26	-3.25202	0.214863	-15.1353	9.47e-52	1.47e-49
Gh_A12G1028	68.8243	-3.24892	0.412108	-7.88367	3.18e-15	7e-14
Gh_D03G0339	670.796	-3.24717	0.134915	-24.0682	5.38e-128	8.25e-125
Gh_A01G0531	468.915	-3.23767	0.214273	-15.11	1.39e-51	2.14e-49
Gh_D12G2121	1661.02	-3.23615	0.189448	-17.082	2.02e-65	4.62e-63
Gh_D10G2532	638.886	-3.23348	0.193109	-16.7443	6.23e-63	1.34e-60
Gh_D06G1145	177.805	-3.23268	0.186089	-17.3717	1.35e-67	3.37e-65
Gh_Sca020069G01	267.069	-3.23117	0.309006	-10.4567	1.37e-25	6.41e-24
Gh_D11G0310	662.653	-3.22643	0.338403	-9.53428	1.51e-21	5.42e-20
Gh_D08G0384	438.388	-3.22148	0.255026	-12.632	1.41e-36	1.19e-34
Gh_D06G0402	723.723	-3.21918	0.17739	-18.1475	1.34e-73	4.19e-71
Gh_D13G1533	6704.81	-3.21556	0.204903	-15.6931	1.69e-55	2.95e-53
Gh_D09G0139	2262.93	-3.20981	0.146327	-21.9359	1.18e-106	1.04e-103
Gh_Sca134791G01	20.6782	-3.20143	0.534432	-5.99034	2.09e-09	2.43e-08
Gh_A08G0609	2661.22	-3.19983	0.164036	-19.5068	9.61e-85	4.41e-82
Gh_A12G0687	1008.92	-3.19978	0.172739	-18.5238	1.33e-76	4.55e-74
Gh_D04G1188	30.4497	-3.19905	0.489338	-6.53751	6.26e-11	8.8e-10
Gh_A13G0402	208.434	-3.19575	0.356622	-8.96115	3.21e-19	9.64e-18
Gh_D05G0318	22.0572	-3.19531	0.453023	-7.05329	1.75e-12	2.92e-11
Gh_D07G2115	40.7319	-3.19386	0.535025	-5.96954	2.38e-09	2.75e-08
Gh_D10G0305	36.2588	-3.18543	0.387898	-8.21203	2.17e-16	5.3e-15
Gh_D01G0627	163.271	-3.17972	0.487311	-6.52503	6.8e-11	9.52e-10
Gh_D04G1090	4594.11	-3.17493	0.230886	-13.751	5.02e-43	5.53e-41
Gh_A03G0016	1609.92	-3.17401	0.24743	-12.8279	1.14e-37	1.02e-35
Gh_D07G0878	1912.05	-3.17364	0.172668	-18.38	1.9e-75	6.26e-73
Gh_A08G1504	182.95	-3.16827	0.347903	-9.10676	8.49e-20	2.67e-18
Gh_A07G1013	327.377	-3.16651	0.257251	-12.309	8.1e-35	6.19e-33
Gh_A05G2996	519.361	-3.16635	0.230327	-13.7472	5.29e-43	5.82e-41
Gh_A12G2359	511.799	-3.15683	0.216483	-14.5824	3.64e-48	4.99e-46
Gh_Sca128228G01	38.263	-3.15539	0.506795	-6.22617	4.78e-10	6.03e-09
Gh_A02G1299	549.406	-3.14721	0.153879	-20.4525	5.71e-93	3.58e-90
Gh_A03G1440	20.717	-3.14593	0.518896	-6.06275	1.34e-09	1.59e-08
Gh_D05G2222	22.9896	-3.14405	0.490016	-6.41621	1.4e-10	1.89e-09
Gh_D01G1920	250.138	-3.14349	0.220071	-14.2839	2.76e-46	3.5e-44
Gh_D02G1677	31.289	-3.14261	0.365237	-8.60432	7.68e-18	2.06e-16
Gh_D07G0263	740.27	-3.14176	0.432121	-7.27055	3.58e-13	6.46e-12
Gh_A07G0547	309.33	-3.13368	0.195244	-16.05	5.71e-58	1.08e-55
Gh_D10G1512	108.75	-3.12642	0.24836	-12.5882	2.45e-36	2.02e-34
Gh_A09G0145	740.569	-3.12233	0.182655	-17.0941	1.64e-65	3.77e-63
Gh_D08G2764	3027.04	-3.12031	0.143131	-21.8005	2.3e-105	1.91e-102
Gh_D09G0053	682.605	-3.11952	0.146992	-21.2223	5.94e-100	4.44e-97
Gh_A11G1607	613.063	-3.11621	0.251638	-12.3837	3.2e-35	2.5e-33
Gh_D02G2274	66.1586	-3.10593	0.372321	-8.34207	7.3e-17	1.83e-15
Gh_D09G1147	12702.6	-3.1004	0.174994	-17.7171	3.09e-70	8.5e-68
Gh_D07G2410	470.375	-3.09904	0.214536	-14.4453	2.68e-47	3.52e-45
Gh_A06G0655	983.262	-3.09288	0.173045	-17.8732	1.91e-71	5.37e-69
Gh_A05G0286	66.2673	-3.09052	0.415161	-7.44414	9.76e-14	1.87e-12
Gh_D12G0051	156.769	-3.08765	0.326718	-9.4505	3.37e-21	1.18e-19
Gh_D10G1271	3227.28	-3.08567	0.162026	-19.0443	7.33e-81	2.83e-78
Gh_D11G2568	458.14	-3.07865	0.234027	-13.1551	1.59e-39	1.53e-37
Gh_A07G0180	83.0894	-3.0759	0.442718	-6.94777	3.71e-12	5.96e-11
Gh_A07G0668	4686.21	-3.07433	0.164203	-18.7227	3.23e-78	1.2e-75
Gh_A01G0684	146.664	-3.07406	0.24095	-12.7581	2.81e-37	2.45e-35
Gh_A09G2385	777.514	-3.07402	0.179204	-17.1538	5.89e-66	1.37e-63
Gh_D12G1755	739.291	-3.07276	0.153755	-19.9848	7.47e-89	3.82e-86
Gh_D03G0085	335.098	-3.07151	0.285635	-10.7533	5.72e-27	2.93e-25
Gh_A04G0894	343.065	-3.05994	0.217268	-14.0837	4.78e-45	5.79e-43
Gh_D04G1702	8.23428	-3.05861	0.522099	-5.8583	4.68e-09	5.19e-08
Gh_A10G0098	400.715	-3.04483	0.296289	-10.2765	8.99e-25	4.04e-23
Gh_A12G1614	1079.25	-3.03865	0.147855	-20.5515	7.46e-94	4.73e-91
Gh_A09G1729	30.2526	-3.03494	0.438799	-6.91648	4.63e-12	7.36e-11
Gh_A12G0022	421.495	-3.03275	0.275414	-11.0116	3.36e-28	1.84e-26
Gh_D05G3868	457.492	-3.03014	0.269584	-11.2401	2.59e-29	1.51e-27
Gh_A11G0166	413.349	-3.02931	0.182856	-16.5666	1.21e-61	2.52e-59
Gh_A05G1784	774.632	-3.0289	0.249903	-12.1203	8.24e-34	6.04e-32
Gh_A09G1680	62.8022	-3.02517	0.324016	-9.33648	9.96e-21	3.34e-19
Gh_A08G1448	32.5633	-3.01915	0.386365	-7.81423	5.53e-15	1.19e-13
Gh_A10G2205	112.371	-3.01363	0.307388	-9.80401	1.08e-22	4.22e-21
Gh_A13G1464	20898.2	-3.00813	0.224931	-13.3736	8.63e-41	8.76e-39
Gh_D05G3468	12177.3	-3.00732	0.208184	-14.4455	2.68e-47	3.52e-45
Gh_A06G0608	308.846	-3.00535	0.48079	-6.25086	4.08e-10	5.19e-09
Gh_Sca009545G01	2759.26	-3.00453	0.260268	-11.544	7.92e-31	5.03e-29
Gh_A04G1105	6.65009	-3.00424	0.534029	-5.62562	1.85e-08	1.89e-07
Gh_D01G2261	29.7362	-3.00138	0.451508	-6.64745	2.98e-11	4.33e-10
Gh_D08G1846	142.393	-3.00032	0.291817	-10.2815	8.54e-25	3.84e-23
Gh_A09G1956	683.795	-3.00014	0.14411	-20.8184	2.95e-96	2.05e-93
Gh_D11G3169	5383.01	-2.99813	0.137275	-21.8403	9.61e-106	8.24e-103
Gh_D03G1504	243.448	-2.99786	0.29057	-10.3172	5.89e-25	2.68e-23
Gh_D05G1979	795.371	-2.99366	0.254517	-11.7621	6.12e-32	4.06e-30
Gh_D01G0705	168.423	-2.9918	0.29002	-10.3159	5.97e-25	2.71e-23
Gh_D04G1713	23.802	-2.99127	0.454634	-6.57951	4.72e-11	6.72e-10
Gh_A07G1899	113.414	-2.99051	0.295915	-10.106	5.2e-24	2.23e-22
Gh_A12G1838	867.315	-2.98851	0.294445	-10.1496	3.33e-24	1.45e-22
Gh_A05G4014	16.0606	-2.98639	0.472469	-6.32082	2.6e-10	3.4e-09
Gh_A10G1766	306.679	-2.98604	0.208108	-14.3485	1.09e-46	1.4e-44
Gh_A07G0202	1600.31	-2.9817	0.179416	-16.6189	5.08e-62	1.06e-59
Gh_A06G1983	645.809	-2.97813	0.272066	-10.9464	6.92e-28	3.72e-26
Gh_D11G0176	343.054	-2.97617	0.195255	-15.2424	1.85e-52	2.93e-50
Gh_D12G1035	385.032	-2.9693	0.233869	-12.6964	6.19e-37	5.32e-35
Gh_A06G1093	213.933	-2.96577	0.253988	-11.6768	1.67e-31	1.08e-29
Gh_D12G1633	186.108	-2.96182	0.319301	-9.27594	1.76e-20	5.83e-19
Gh_D03G1507	460.529	-2.9576	0.248691	-11.8927	1.29e-32	8.85e-31
Gh_D02G1283	347.327	-2.95721	0.320304	-9.23251	2.64e-20	8.63e-19
Gh_D11G0065	9.57751	-2.95707	0.500851	-5.90409	3.55e-09	4e-08
Gh_D13G1732	20911.5	-2.95127	0.193101	-15.2835	9.85e-53	1.57e-50
Gh_D02G0730	43.8198	-2.95126	0.435633	-6.77465	1.25e-11	1.9e-10
Gh_A03G0887	23.5945	-2.95085	0.46585	-6.33433	2.38e-10	3.13e-09
Gh_D02G0732	372.735	-2.94726	0.218325	-13.4994	1.58e-41	1.65e-39
Gh_A02G0348	11.0636	-2.94546	0.455138	-6.47157	9.7e-11	1.34e-09
Gh_A09G2386	317.845	-2.93773	0.184449	-15.9271	4.11e-57	7.45e-55
Gh_D06G1894	34.076	-2.93268	0.436701	-6.71553	1.87e-11	2.79e-10
Gh_D01G0937	481.852	-2.92926	0.409076	-7.16068	8.03e-13	1.4e-11
Gh_D05G3859	1101.49	-2.92711	0.324508	-9.02015	1.88e-19	5.76e-18
Gh_D02G2264	1516.17	-2.9172	0.158037	-18.459	4.41e-76	1.47e-73
Gh_D01G1535	216.459	-2.91447	0.257603	-11.3138	1.12e-29	6.66e-28
Gh_A11G1816	576.425	-2.91235	0.225097	-12.9382	2.74e-38	2.5e-36
Gh_D09G2007	116.475	-2.91231	0.242031	-12.0328	2.39e-33	1.71e-31
Gh_A13G1158	3650.5	-2.91062	0.150636	-19.3222	3.5e-83	1.49e-80
Gh_D09G1775	380.022	-2.89986	0.205949	-14.0805	5.01e-45	6.03e-43
Gh_A07G2349	731.115	-2.89898	0.396634	-7.30895	2.69e-13	4.94e-12
Gh_D02G1861	139.1	-2.8979	0.216756	-13.3694	9.13e-41	9.25e-39
Gh_A02G1372	66.5911	-2.89674	0.306835	-9.44071	3.7e-21	1.29e-19
Gh_D10G0303	495.383	-2.89636	0.189187	-15.3095	6.61e-53	1.06e-50
Gh_A08G1541	189.279	-2.89516	0.472779	-6.1237	9.14e-10	1.11e-08
Gh_D04G1444	27.7653	-2.89477	0.453468	-6.38361	1.73e-10	2.31e-09
Gh_A07G0233	882.285	-2.89245	0.155737	-18.5727	5.35e-77	1.87e-74
Gh_D02G1885	705.472	-2.89194	0.238078	-12.147	5.95e-34	4.39e-32
Gh_A12G2401	627.093	-2.89134	0.227988	-12.682	7.44e-37	6.37e-35
Gh_A07G0824	172.47	-2.87956	0.192429	-14.9643	1.26e-50	1.88e-48
Gh_A12G1617	13702.5	-2.87463	0.167549	-17.157	5.57e-66	1.31e-63
Gh_A12G0036	145.09	-2.87284	0.253318	-11.3409	8.23e-30	4.91e-28
Gh_A07G0209	484.937	-2.87013	0.440954	-6.50891	7.57e-11	1.05e-09
Gh_A11G0646	334.415	-2.86761	0.202158	-14.185	1.14e-45	1.41e-43
Gh_D10G0005	94.6678	-2.86737	0.292965	-9.78742	1.28e-22	4.94e-21
Gh_D02G1899	3.39492	-2.86402	0.526889	-5.43572	5.46e-08	5.19e-07
Gh_D08G0948	27.3867	-2.86128	0.403057	-7.09894	1.26e-12	2.14e-11
Gh_A01G0898	1142.6	-2.86017	0.369571	-7.73917	1e-14	2.1e-13
Gh_A08G2234	23.3662	-2.85476	0.526364	-5.42354	5.84e-08	5.54e-07
Gh_D07G0746	4757.08	-2.84798	0.147001	-19.3739	1.28e-83	5.66e-81
Gh_A03G0547	43.8113	-2.84624	0.38983	-7.30124	2.85e-13	5.21e-12
Gh_D11G1301	600.93	-2.84376	0.252598	-11.258	2.11e-29	1.24e-27
Gh_A09G2229	181.689	-2.84057	0.278862	-10.1863	2.28e-24	1e-22
Gh_D01G0331	361.767	-2.84017	0.302797	-9.37979	6.61e-21	2.26e-19
Gh_D09G2008	3576.15	-2.83825	0.167371	-16.9578	1.68e-64	3.76e-62
Gh_D12G2496	315.747	-2.83277	0.226448	-12.5096	6.62e-36	5.36e-34
Gh_A05G1539	72.715	-2.83275	0.313932	-9.02346	1.82e-19	5.59e-18
Gh_D06G2263	104.14	-2.83025	0.267923	-10.5637	4.39e-26	2.14e-24
Gh_A05G1652	404.534	-2.82268	0.398909	-7.07601	1.48e-12	2.5e-11
Gh_A07G1196	11.9944	-2.81976	0.480058	-5.87378	4.26e-09	4.75e-08
Gh_A07G0713	2208.1	-2.81874	0.112152	-25.1333	2.15e-139	4.48e-136
Gh_D12G2528	867.532	-2.81221	0.141816	-19.8301	1.64e-87	8.03e-85
Gh_D11G2086	69.7935	-2.81199	0.365162	-7.70066	1.35e-14	2.81e-13
Gh_D06G0203	10.1958	-2.80656	0.518452	-5.41334	6.19e-08	5.84e-07
Gh_A10G1830	115.054	-2.80391	0.307648	-9.11401	7.94e-20	2.5e-18
Gh_D02G1780	864.814	-2.80377	0.160968	-17.4182	6.01e-68	1.56e-65
Gh_D01G2085	792.871	-2.80032	0.278197	-10.066	7.81e-24	3.3e-22
Gh_A09G1570	403.032	-2.79878	0.219435	-12.7545	2.94e-37	2.56e-35
Gh_A05G1425	11.8603	-2.79866	0.520417	-5.37773	7.54e-08	7e-07
Gh_A12G0222	162.804	-2.79639	0.170051	-16.4444	9.2e-61	1.85e-58
Gh_D11G1666	5282.42	-2.79459	0.146291	-19.1029	2.39e-81	9.34e-79
Gh_D04G0539	38.6587	-2.79449	0.381486	-7.32527	2.38e-13	4.39e-12
Gh_D09G2161	1211.03	-2.7935	0.13544	-20.6253	1.63e-94	1.07e-91
Gh_A09G1809	2857.46	-2.79187	0.191869	-14.5509	5.76e-48	7.83e-46
Gh_D09G0912	178.847	-2.79065	0.26868	-10.3865	2.86e-25	1.32e-23
Gh_D05G1724	701.839	-2.78711	0.22574	-12.3465	5.09e-35	3.94e-33
Gh_D06G2020	64.8247	-2.783	0.452224	-6.15404	7.55e-10	9.29e-09
Gh_D05G3825	7955.12	-2.7815	0.175682	-15.8326	1.85e-56	3.34e-54
Gh_A02G1385	1116.55	-2.77859	0.114974	-24.1671	4.94e-129	7.78e-126
Gh_D03G1842	8790.01	-2.77855	0.152984	-18.1624	1.02e-73	3.21e-71
Gh_Sca005081G03	26.6743	-2.77822	0.460671	-6.03081	1.63e-09	1.92e-08
Gh_D07G0354	845.02	-2.77737	0.134526	-20.6456	1.07e-94	7.08e-92
Gh_A05G1175	800.25	-2.77668	0.235464	-11.7924	4.27e-32	2.85e-30
Gh_D09G2152	388.792	-2.77161	0.323757	-8.56077	1.12e-17	2.98e-16
Gh_D08G0665	1521.06	-2.76573	0.213395	-12.9606	2.05e-38	1.88e-36
Gh_D05G0972	24.7719	-2.76562	0.487734	-5.67035	1.43e-08	1.48e-07
Gh_D11G1109	452.999	-2.76482	0.207751	-13.3083	2.07e-40	2.05e-38
Gh_D02G2322	2316.23	-2.76302	0.150449	-18.3651	2.5e-75	8.15e-73
Gh_D08G1892	7024.12	-2.75553	0.142095	-19.3922	8.98e-84	4.03e-81
Gh_D02G0555	647.757	-2.75519	0.261562	-10.5336	6.05e-26	2.9e-24
Gh_D02G1996	43424.4	-2.75139	0.160408	-17.1525	6.02e-66	1.4e-63
Gh_A05G3863	1317.26	-2.74708	0.176713	-15.5454	1.71e-54	2.85e-52
Gh_D10G0295	51.0115	-2.74481	0.366853	-7.48205	7.32e-14	1.41e-12
Gh_A10G1648	454.647	-2.73957	0.193209	-14.1793	1.23e-45	1.53e-43
Gh_A11G2885	30.1408	-2.73928	0.453069	-6.04606	1.48e-09	1.75e-08
Gh_A05G1173	285.13	-2.73801	0.223142	-12.2703	1.31e-34	9.92e-33
Gh_D07G0883	92.7531	-2.73719	0.266392	-10.2751	9.13e-25	4.1e-23
Gh_A03G2154	42226.7	-2.73659	0.171403	-15.9658	2.21e-57	4.07e-55
Gh_D01G0078	1707.7	-2.72996	0.163081	-16.7399	6.71e-63	1.43e-60
Gh_D06G0690	91.3773	-2.72221	0.495052	-5.49883	3.82e-08	3.72e-07
Gh_D01G0531	20086.9	-2.72037	0.220713	-12.3254	6.61e-35	5.08e-33
Gh_A11G1122	81.7553	-2.71458	0.301964	-8.98976	2.48e-19	7.5e-18
Gh_D11G3395	984.678	-2.71346	0.138716	-19.5612	3.31e-85	1.53e-82
Gh_A06G0210	60.0844	-2.71286	0.402519	-6.73972	1.59e-11	2.38e-10
Gh_A01G2116	393.416	-2.70594	0.216046	-12.5248	5.46e-36	4.46e-34
Gh_A10G1726	311.558	-2.7051	0.23528	-11.4974	1.36e-30	8.52e-29
Gh_D12G1757	14001.4	-2.70467	0.153485	-17.6218	1.68e-69	4.55e-67
Gh_Sca005107G02	23.3059	-2.70309	0.461018	-5.86331	4.54e-09	5.04e-08
Gh_D09G0697	7.15722	-2.70273	0.529022	-5.10892	3.24e-07	2.72e-06
Gh_D01G1884	10.8553	-2.70118	0.523908	-5.15583	2.53e-07	2.16e-06
Gh_A08G1447	31.5234	-2.69864	0.411338	-6.56064	5.36e-11	7.59e-10
Gh_D05G1448	30.3952	-2.69755	0.533375	-5.0575	4.25e-07	3.51e-06
Gh_A08G0775	594.329	-2.69546	0.203981	-13.2143	7.26e-40	7.09e-38
Gh_D11G1501	1793.06	-2.69379	0.15335	-17.5663	4.46e-69	1.19e-66
Gh_Sca010895G01	45.3434	-2.69368	0.47103	-5.7187	1.07e-08	1.13e-07
Gh_A08G1808	8925.14	-2.69341	0.110977	-24.2699	4.08e-130	6.79e-127
Gh_D08G1030	1397.05	-2.69294	0.207656	-12.9683	1.85e-38	1.71e-36
Gh_A12G1993	625.729	-2.69279	0.188158	-14.3113	1.86e-46	2.37e-44
Gh_A03G0279	407.483	-2.69253	0.218082	-12.3464	5.09e-35	3.94e-33
Gh_A02G1379	6.89864	-2.68978	0.504667	-5.32981	9.83e-08	8.94e-07
Gh_D04G1703	754.86	-2.68871	0.178244	-15.0845	2.05e-51	3.13e-49
Gh_A12G2001	18.4208	-2.6824	0.499214	-5.37325	7.73e-08	7.16e-07
Gh_A02G0347	9.91881	-2.68234	0.524875	-5.11044	3.21e-07	2.7e-06
Gh_D02G2150	749.675	-2.6822	0.372868	-7.19342	6.32e-13	1.11e-11
Gh_A05G3112	624.074	-2.68079	0.131918	-20.3217	8.27e-92	4.87e-89
Gh_A03G1815	187.499	-2.68015	0.338099	-7.9271	2.24e-15	5.01e-14
Gh_D05G3698	5.94304	-2.67889	0.52941	-5.06014	4.19e-07	3.46e-06
Gh_A07G0629	267.039	-2.6788	0.222302	-12.0503	1.93e-33	1.39e-31
Gh_A05G3751	68.1025	-2.67534	0.419378	-6.3793	1.78e-10	2.37e-09
Gh_A03G1993	16.746	-2.67377	0.511507	-5.22723	1.72e-07	1.51e-06
Gh_D03G0895	333.03	-2.66634	0.251701	-10.5933	3.2e-26	1.57e-24
Gh_A04G0927	13.7639	-2.66539	0.525901	-5.06823	4.02e-07	3.32e-06
Gh_D07G1659	46505.7	-2.66375	0.306493	-8.69106	3.59e-18	9.92e-17
Gh_A11G2928	61.2317	-2.65888	0.33608	-7.91143	2.54e-15	5.65e-14
Gh_A08G2389	1244.97	-2.65399	0.245189	-10.8242	2.64e-27	1.38e-25
Gh_A05G1099	6227.38	-2.65109	0.259151	-10.2299	1.46e-24	6.46e-23
Gh_Sca139059G01	147.416	-2.65048	0.370367	-7.15637	8.28e-13	1.44e-11
Gh_Sca102885G01	48.8583	-2.64669	0.480963	-5.50289	3.74e-08	3.64e-07
Gh_D12G2292	73.3821	-2.64573	0.334694	-7.90491	2.68e-15	5.94e-14
Gh_A03G1831	1904.78	-2.6449	0.116612	-22.6812	6.87e-114	8.17e-111
Gh_A04G0240	11668.7	-2.63415	0.190542	-13.8245	1.81e-43	2.03e-41
Gh_D06G1073	142.447	-2.63287	0.295027	-8.92416	4.49e-19	1.33e-17
Gh_A12G2406	1937.02	-2.63209	0.252689	-10.4163	2.09e-25	9.75e-24
Gh_A08G2235	527.741	-2.63164	0.289866	-9.07881	1.1e-19	3.42e-18
Gh_A08G1543	1449.19	-2.63145	0.41789	-6.297	3.03e-10	3.92e-09
Gh_A08G0771	39.6192	-2.6293	0.377958	-6.95658	3.49e-12	5.62e-11
Gh_D03G1859	2227.97	-2.62811	0.177847	-14.7774	2.05e-49	2.94e-47
Gh_D06G2293	1082.28	-2.6273	0.146345	-17.9527	4.57e-72	1.33e-69
Gh_D11G1125	90.3297	-2.62651	0.406649	-6.45891	1.05e-10	1.45e-09
Gh_A02G0753	691.708	-2.62304	0.119126	-22.019	1.89e-107	1.75e-104
Gh_D10G0369	222838	-2.62246	0.234826	-11.1677	5.87e-29	3.33e-27
Gh_D02G1442	314.007	-2.6177	0.27038	-9.68154	3.61e-22	1.34e-20
Gh_D11G1530	778.041	-2.61728	0.175945	-14.8755	4.75e-50	6.92e-48
Gh_A01G1670	186.061	-2.61552	0.243282	-10.751	5.86e-27	2.99e-25
Gh_D08G1842	135.075	-2.61523	0.485961	-5.38156	7.38e-08	6.86e-07
Gh_D07G0291	939.234	-2.61455	0.150361	-17.3885	1.01e-67	2.56e-65
Gh_A09G1635	196.195	-2.61101	0.179897	-14.5139	9.89e-48	1.33e-45
Gh_D08G2596	1109.4	-2.61008	0.245712	-10.6225	2.34e-26	1.15e-24
Gh_A07G0837	6.1656	-2.604	0.53626	-4.85586	1.2e-06	9.15e-06
Gh_A05G0069	197.081	-2.60309	0.203677	-12.7805	2.11e-37	1.85e-35
Gh_D07G0293	15088	-2.60097	0.103677	-25.0873	6.84e-139	1.38e-135
Gh_A06G0682	668.231	-2.59986	0.119103	-21.8288	1.24e-105	1.05e-102
Gh_D03G1285	462.652	-2.59895	0.20919	-12.4238	1.94e-35	1.54e-33
Gh_D01G1467	606.73	-2.59652	0.202788	-12.8041	1.56e-37	1.38e-35
Gh_D03G0554	102.127	-2.59652	0.35006	-7.41736	1.19e-13	2.26e-12
Gh_D11G1500	24.9142	-2.59276	0.493041	-5.25871	1.45e-07	1.29e-06
Gh_D09G0072	12.83	-2.59121	0.525487	-4.93107	8.18e-07	6.44e-06
Gh_D06G2235	1242.04	-2.5881	0.222607	-11.6263	3.03e-31	1.95e-29
Gh_Sca101176G01	20.0051	-2.57754	0.494199	-5.21559	1.83e-07	1.6e-06
Gh_A12G2024	352.538	-2.5775	0.20741	-12.4271	1.86e-35	1.48e-33
Gh_D05G3113	229.211	-2.57505	0.1859	-13.8518	1.24e-43	1.41e-41
Gh_A05G1665	1273.91	-2.57336	0.139304	-18.473	3.41e-76	1.14e-73
Gh_D02G1862	189.929	-2.57323	0.189064	-13.6104	3.48e-42	3.72e-40
Gh_D10G2577	151.772	-2.57022	0.321856	-7.98562	1.4e-15	3.18e-14
Gh_A02G0721	1852.18	-2.56735	0.123138	-20.8494	1.54e-96	1.08e-93
Gh_A10G1311	1394.43	-2.56659	0.195543	-13.1255	2.35e-39	2.24e-37
Gh_D06G0745	645.033	-2.56658	0.195269	-13.1438	1.85e-39	1.77e-37
Gh_D10G0602	24.8311	-2.56504	0.409318	-6.26661	3.69e-10	4.72e-09
Gh_A08G0702	33.2633	-2.56483	0.424051	-6.04842	1.46e-09	1.73e-08
Gh_A11G1431	2350.56	-2.56191	0.151288	-16.9341	2.52e-64	5.57e-62
Gh_A13G1234	602.837	-2.55723	0.192181	-13.3064	2.13e-40	2.1e-38
Gh_A08G1537	106.202	-2.55702	0.358881	-7.12499	1.04e-12	1.78e-11
Gh_D11G1764	415.98	-2.55528	0.187404	-13.6352	2.47e-42	2.67e-40
Gh_D05G1401	100.883	-2.5541	0.292767	-8.72402	2.68e-18	7.49e-17
Gh_D13G1688	77.795	-2.55391	0.372318	-6.85949	6.91e-12	1.08e-10
Gh_D05G1841	31.9778	-2.54982	0.50276	-5.07165	3.94e-07	3.27e-06
Gh_D08G1343	280.85	-2.54446	0.203337	-12.5135	6.3e-36	5.12e-34
Gh_Sca174801G01	27.5873	-2.54133	0.434663	-5.84667	5.02e-09	5.54e-08
Gh_D07G0368	528.689	-2.54004	0.180819	-14.0474	7.99e-45	9.51e-43
Gh_A06G1859	45.3198	-2.53943	0.407081	-6.23815	4.43e-10	5.61e-09
Gh_D05G1597	140.548	-2.53786	0.260216	-9.75291	1.79e-22	6.85e-21
Gh_A05G1141	25.1501	-2.53665	0.41905	-6.05335	1.42e-09	1.68e-08
Gh_A08G2230	626.481	-2.53623	0.201629	-12.5787	2.77e-36	2.27e-34
Gh_A03G1841	32.6881	-2.53594	0.412715	-6.14454	8.02e-10	9.83e-09
Gh_A01G0439	19.0306	-2.53497	0.450317	-5.6293	1.81e-08	1.85e-07
Gh_D05G0751	729.99	-2.53463	0.165554	-15.31	6.56e-53	1.06e-50
Gh_Sca074112G01	374.67	-2.5277	0.158663	-15.9313	3.84e-57	7.02e-55
Gh_D11G0266	279.938	-2.52729	0.248943	-10.1521	3.24e-24	1.41e-22
Gh_D07G0951	47.8158	-2.52473	0.37756	-6.68698	2.28e-11	3.36e-10
Gh_A05G3766	7978.06	-2.52387	0.135459	-18.632	1.77e-77	6.25e-75
Gh_A07G0151	12.9258	-2.52136	0.505962	-4.9833	6.25e-07	5.02e-06
Gh_D07G2265	48.7097	-2.51925	0.334139	-7.53953	4.72e-14	9.27e-13
Gh_Sca051099G01	9.55586	-2.51896	0.495042	-5.08839	3.61e-07	3.01e-06
Gh_A04G0697	148.346	-2.51761	0.238397	-10.5606	4.54e-26	2.2e-24
Gh_Sca124300G01	25.7643	-2.51589	0.503995	-4.99189	5.98e-07	4.82e-06
Gh_A13G1604	818.817	-2.51473	0.248839	-10.1058	5.2e-24	2.23e-22
Gh_D13G0082	218.443	-2.51471	0.190514	-13.1996	8.82e-40	8.58e-38
Gh_A12G2185	492.61	-2.5147	0.202903	-12.3936	2.83e-35	2.22e-33
Gh_D12G1290	58.7202	-2.50888	0.398893	-6.2896	3.18e-10	4.1e-09
Gh_D05G2200	905.492	-2.50616	0.135655	-18.4745	3.31e-76	1.12e-73
Gh_D04G1715	103.649	-2.5035	0.236714	-10.5761	3.85e-26	1.87e-24
Gh_D07G0353	1292.11	-2.50147	0.143968	-17.3751	1.27e-67	3.2e-65
Gh_A11G2570	1017.99	-2.50041	0.152846	-16.359	3.75e-60	7.39e-58
Gh_D06G1444	114.581	-2.49943	0.273023	-9.15465	5.45e-20	1.75e-18
Gh_D01G1851	48.7767	-2.49841	0.373373	-6.69146	2.21e-11	3.27e-10
Gh_A13G0059	77.8957	-2.49746	0.347255	-7.19198	6.39e-13	1.12e-11
Gh_D08G1837	25.763	-2.49704	0.417821	-5.97633	2.28e-09	2.64e-08
Gh_D10G1903	793.049	-2.49636	0.206762	-12.0736	1.46e-33	1.05e-31
Gh_A13G0971	131.056	-2.49452	0.382197	-6.5268	6.72e-11	9.42e-10
Gh_A12G0696	167.549	-2.49259	0.199563	-12.4902	8.44e-36	6.81e-34
Gh_A01G1029	847.709	-2.49102	0.182869	-13.6219	2.97e-42	3.19e-40
Gh_A07G0981	130.19	-2.4908	0.295414	-8.43156	3.41e-17	8.76e-16
Gh_A03G1960	8599.32	-2.48904	0.147677	-16.8545	9.71e-64	2.12e-61
Gh_A08G1903	16.7537	-2.48705	0.49388	-5.03574	4.76e-07	3.9e-06
Gh_D06G0191	1150.28	-2.48624	0.158783	-15.6581	2.93e-55	5.05e-53
Gh_A13G0605	68.8041	-2.486	0.340792	-7.29476	2.99e-13	5.45e-12
Gh_D03G1250	99.4137	-2.48551	0.276535	-8.98806	2.52e-19	7.61e-18
Gh_A12G0510	9.9084	-2.48289	0.49727	-4.99304	5.94e-07	4.79e-06
Gh_D05G3672	1876.46	-2.48139	0.224182	-11.0686	1.78e-28	9.92e-27
Gh_D12G2194	1933.59	-2.48082	0.136267	-18.2056	4.66e-74	1.47e-71
Gh_A08G1440	686.58	-2.48058	0.108525	-22.8573	1.24e-115	1.54e-112
Gh_A04G1396	299.523	-2.47992	0.270003	-9.18479	4.12e-20	1.33e-18
Gh_A10G1039	6638.03	-2.47723	0.124076	-19.9654	1.1e-88	5.58e-86
Gh_D01G2181	114.31	-2.47642	0.261179	-9.48172	2.5e-21	8.83e-20
Gh_D10G0605	4.49737	-2.47631	0.521594	-4.74759	2.06e-06	1.52e-05
Gh_D02G0764	1519.53	-2.47594	0.128582	-19.2557	1.26e-82	5.27e-80
Gh_D05G1016	67.2994	-2.47477	0.460806	-5.37051	7.85e-08	7.26e-07
Gh_A06G1594	159.154	-2.47195	0.261276	-9.46107	3.05e-21	1.07e-19
Gh_A07G2288	239.682	-2.46843	0.263928	-9.35267	8.55e-21	2.89e-19
Gh_A06G0969	366.052	-2.46773	0.146321	-16.8652	8.11e-64	1.78e-61
Gh_D12G1760	187.099	-2.46701	0.380815	-6.47825	9.28e-11	1.28e-09
Gh_A05G0346	1070.8	-2.4652	0.131671	-18.7224	3.25e-78	1.2e-75
Gh_D04G0579	721.163	-2.46445	0.17005	-14.4926	1.35e-47	1.81e-45
Gh_D04G0269	10240.4	-2.4622	0.121714	-20.2294	5.39e-91	3.02e-88
Gh_A05G1658	15.3545	-2.45905	0.490649	-5.01183	5.39e-07	4.38e-06
Gh_Sca039162G01	47.9103	-2.45863	0.447483	-5.49435	3.92e-08	3.81e-07
Gh_D11G3519	460.623	-2.45791	0.201114	-12.2215	2.39e-34	1.8e-32
Gh_D07G2420	1530.64	-2.45736	0.0982548	-25.01	4.75e-138	8.94e-135
Gh_A12G0883	10.6197	-2.45688	0.529094	-4.64357	3.42e-06	2.43e-05
Gh_A11G0998	6.12001	-2.45378	0.524155	-4.6814	2.85e-06	2.04e-05
Gh_A03G1044	93.1664	-2.45087	0.385399	-6.35929	2.03e-10	2.68e-09
Gh_D07G2408	34.5469	-2.45066	0.372352	-6.58158	4.65e-11	6.63e-10
Gh_D04G1904	64.3441	-2.44977	0.380399	-6.44001	1.19e-10	1.63e-09
Gh_A08G1540	39.9725	-2.44885	0.309096	-7.92263	2.33e-15	5.18e-14
Gh_A12G2027	38.8953	-2.44767	0.340957	-7.17883	7.03e-13	1.23e-11
Gh_D04G1204	307.407	-2.4475	0.267297	-9.15647	5.36e-20	1.72e-18
Gh_D07G0698	404.649	-2.44728	0.241773	-10.1222	4.4e-24	1.9e-22
Gh_A01G0372	67.3679	-2.44642	0.307721	-7.95015	1.86e-15	4.19e-14
Gh_A07G0673	970.063	-2.44482	0.333967	-7.32055	2.47e-13	4.54e-12
Gh_D08G2582	22.0155	-2.4392	0.421699	-5.78423	7.28e-09	7.87e-08
Gh_Sca161956G01	65.1219	-2.43866	0.38615	-6.3153	2.7e-10	3.51e-09
Gh_D09G1653	150.089	-2.4379	0.197468	-12.3458	5.13e-35	3.97e-33
Gh_D13G0093	243.7	-2.43574	0.196366	-12.4041	2.48e-35	1.96e-33
Gh_A11G2571	38.9903	-2.43427	0.321863	-7.56307	3.94e-14	7.8e-13
Gh_A10G1346	3707.55	-2.43384	0.210997	-11.5349	8.8e-31	5.57e-29
Gh_A06G1466	59949.1	-2.43256	0.151942	-16.0097	1.09e-57	2.04e-55
Gh_A10G0361	230210	-2.4315	0.213959	-11.3643	6.3e-30	3.79e-28
Gh_D08G1732	429.819	-2.43072	0.173383	-14.0194	1.19e-44	1.4e-42
Gh_A08G1792	63.0031	-2.42801	0.310493	-7.81983	5.29e-15	1.14e-13
Gh_A11G1353	1690.75	-2.42671	0.150755	-16.097	2.68e-58	5.08e-56
Gh_D12G1496	238.977	-2.42622	0.333914	-7.26598	3.7e-13	6.68e-12
Gh_A01G1606	303.712	-2.4255	0.283137	-8.56651	1.07e-17	2.84e-16
Gh_A06G1728	44.1514	-2.42311	0.463213	-5.23109	1.69e-07	1.48e-06
Gh_D11G3478	26.8457	-2.42279	0.423495	-5.72094	1.06e-08	1.12e-07
Gh_D03G1509	21.6347	-2.422	0.463035	-5.2307	1.69e-07	1.48e-06
Gh_Sca049853G01	97.5504	-2.42114	0.339047	-7.141	9.27e-13	1.6e-11
Gh_D06G0784	937.884	-2.42099	0.120635	-20.0687	1.39e-89	7.35e-87
Gh_D10G0238	202.913	-2.42058	0.284072	-8.52099	1.58e-17	4.17e-16
Gh_D04G0746	1586.19	-2.41823	0.193102	-12.5231	5.58e-36	4.55e-34
Gh_D08G0702	4886.97	-2.4157	0.215828	-11.1927	4.43e-29	2.54e-27
Gh_D02G1670	1118.36	-2.41524	0.238968	-10.107	5.14e-24	2.21e-22
Gh_D11G1894	30.4601	-2.41154	0.418237	-5.76597	8.12e-09	8.7e-08
Gh_D01G2155	212.242	-2.40541	0.417387	-5.76302	8.26e-09	8.84e-08
Gh_D05G2271	10.15	-2.40399	0.49855	-4.82196	1.42e-06	1.07e-05
Gh_D05G2265	578.851	-2.40352	0.258669	-9.29188	1.52e-20	5.04e-19
Gh_D11G1124	9.00096	-2.40342	0.510777	-4.70542	2.53e-06	1.83e-05
Gh_Sca133742G01	208.338	-2.4003	0.283626	-8.4629	2.61e-17	6.76e-16
Gh_D11G2279	24.226	-2.4001	0.424847	-5.64933	1.61e-08	1.67e-07
Gh_D10G1912	444.658	-2.39669	0.26308	-9.11013	8.23e-20	2.59e-18
Gh_A08G0899	4314.87	-2.39427	0.134466	-17.8057	6.38e-71	1.76e-68
Gh_A05G0616	764.955	-2.39337	0.180293	-13.2749	3.24e-40	3.18e-38
Gh_D04G1330	1198.58	-2.39264	0.27344	-8.75013	2.13e-18	5.99e-17
Gh_D11G1769	675.796	-2.38989	0.161824	-14.7685	2.34e-49	3.35e-47
Gh_D11G1404	221.892	-2.38903	0.262893	-9.08745	1.01e-19	3.17e-18
Gh_D01G1852	109.709	-2.38866	0.323548	-7.38271	1.55e-13	2.91e-12
Gh_A02G0058	46.6129	-2.38793	0.397261	-6.01098	1.84e-09	2.16e-08
Gh_Sca006871G01	1685.79	-2.38773	0.117897	-20.2526	3.37e-91	1.91e-88
Gh_D09G1246	90.8475	-2.3856	0.312618	-7.63105	2.33e-14	4.72e-13
Gh_D08G1734	530.303	-2.38517	0.127938	-18.6432	1.43e-77	5.13e-75
Gh_A11G1502	1452.54	-2.38473	0.200048	-11.9208	9.22e-33	6.38e-31
Gh_A11G1357	53296.4	-2.38467	0.192337	-12.3984	2.67e-35	2.1e-33
Gh_A11G1253	85.7632	-2.38248	0.321556	-7.40923	1.27e-13	2.4e-12
Gh_D07G1434	35.1392	-2.38066	0.48855	-4.8729	1.1e-06	8.45e-06
Gh_D10G1124	4199.24	-2.38012	0.221026	-10.7685	4.85e-27	2.5e-25
Gh_D02G2445	60.4896	-2.37972	0.325182	-7.31813	2.51e-13	4.62e-12
Gh_A12G2192	96.414	-2.37953	0.309063	-7.69918	1.37e-14	2.84e-13
Gh_A04G0748	152.214	-2.3794	0.266966	-8.91273	4.98e-19	1.47e-17
Gh_A03G0955	17.7144	-2.37768	0.482093	-4.93199	8.14e-07	6.41e-06
Gh_Sca006915G01	193.254	-2.37475	0.389686	-6.09402	1.1e-09	1.33e-08
Gh_A09G2286	3130.67	-2.37224	0.134159	-17.6823	5.74e-70	1.57e-67
Gh_D05G1665	1795.72	-2.37082	0.305642	-7.75687	8.71e-15	1.84e-13
Gh_D08G1844	8842.25	-2.37015	0.167325	-14.165	1.51e-45	1.86e-43
Gh_A09G1634	1477.33	-2.36611	0.130757	-18.0955	3.46e-73	1.05e-70
Gh_D02G2235	214.492	-2.36562	0.474049	-4.99023	6.03e-07	4.86e-06
Gh_A02G1637	343.343	-2.36471	0.259242	-9.12164	7.4e-20	2.34e-18
Gh_A04G0961	10.5226	-2.36431	0.513436	-4.60487	4.13e-06	2.88e-05
Gh_D02G0893	15.2489	-2.36404	0.480385	-4.92114	8.6e-07	6.74e-06
Gh_A01G0712	33.4453	-2.36299	0.350259	-6.74642	1.52e-11	2.28e-10
Gh_A10G2085	104.487	-2.36263	0.386809	-6.10801	1.01e-09	1.22e-08
Gh_A07G2182	52408.4	-2.36227	0.194755	-12.1294	7.37e-34	5.41e-32
Gh_D09G1419	381.495	-2.36198	0.243119	-9.7153	2.59e-22	9.8e-21
Gh_A12G0562	19516.5	-2.36177	0.143045	-16.5107	3.07e-61	6.22e-59
Gh_A08G1438	476.341	-2.36167	0.1602	-14.742	3.46e-49	4.94e-47
Gh_D03G1508	31.483	-2.36057	0.43509	-5.42548	5.78e-08	5.48e-07
Gh_A08G2001	62.2178	-2.35844	0.312548	-7.54585	4.49e-14	8.86e-13
Gh_Sca075325G01	39.6773	-2.35805	0.466308	-5.05684	4.26e-07	3.52e-06
Gh_A02G1735	26.2019	-2.35778	0.432716	-5.44879	5.07e-08	4.84e-07
Gh_D05G2455	11.5785	-2.35725	0.527428	-4.46932	7.85e-06	5.2e-05
Gh_A11G1752	42.0759	-2.35498	0.330411	-7.12741	1.02e-12	1.75e-11
Gh_D13G0197	81.3151	-2.35396	0.35523	-6.62658	3.44e-11	4.96e-10
Gh_D05G0463	339.637	-2.35381	0.263282	-8.94028	3.88e-19	1.16e-17
Gh_Sca058812G01	10273	-2.35201	0.196028	-11.9983	3.63e-33	2.57e-31
Gh_A02G1285	4028.44	-2.35162	0.12153	-19.3501	2.03e-83	8.78e-81
Gh_D08G1099	4187.75	-2.35101	0.138521	-16.9723	1.32e-64	2.96e-62
Gh_D05G1853	834.879	-2.34999	0.134763	-17.438	4.25e-68	1.12e-65
Gh_A03G0840	258.868	-2.34973	0.336223	-6.98862	2.78e-12	4.52e-11
Gh_D10G0217	493.134	-2.34839	0.406192	-5.78148	7.4e-09	7.99e-08
Gh_A01G1504	732.178	-2.34436	0.166702	-14.0632	6.4e-45	7.67e-43
Gh_A12G0265	235.836	-2.34436	0.224883	-10.4248	1.91e-25	8.93e-24
Gh_A06G0913	230.286	-2.34345	0.240491	-9.74443	1.95e-22	7.43e-21
Gh_A09G2315	35.4797	-2.34222	0.413621	-5.66273	1.49e-08	1.54e-07
Gh_A01G1717	2261.01	-2.33799	0.231529	-10.0981	5.64e-24	2.41e-22
Gh_D02G1309	27.7677	-2.33622	0.404732	-5.77225	7.82e-09	8.4e-08
Gh_D13G1199	3521.94	-2.3333	0.167778	-13.9071	5.74e-44	6.64e-42
Gh_A13G1580	1994.1	-2.3328	0.14026	-16.6319	4.09e-62	8.58e-60
Gh_A08G2525	72.8594	-2.33204	0.435756	-5.35171	8.71e-08	8e-07
Gh_Sca121476G01	609.474	-2.33182	0.356505	-6.54078	6.12e-11	8.62e-10
Gh_D08G0923	1310.4	-2.33181	0.130288	-17.8973	1.24e-71	3.5e-69
Gh_A12G0278	475.213	-2.32985	0.158244	-14.7231	4.58e-49	6.5e-47
Gh_A05G2210	8.40801	-2.32677	0.481464	-4.8327	1.35e-06	1.02e-05
Gh_A09G1685	320.748	-2.32603	0.18774	-12.3896	2.97e-35	2.33e-33
Gh_D07G0417	491.97	-2.32511	0.209852	-11.0798	1.57e-28	8.8e-27
Gh_D12G0245	34.396	-2.32189	0.397144	-5.84647	5.02e-09	5.55e-08
Gh_A07G2184	44040.9	-2.32103	0.22883	-10.143	3.56e-24	1.55e-22
Gh_D06G1997	137.316	-2.317	0.276702	-8.37363	5.59e-17	1.41e-15
Gh_A09G1070	532.992	-2.31348	0.183257	-12.6242	1.55e-36	1.3e-34
Gh_A06G1742	820.832	-2.31324	0.214815	-10.7685	4.85e-27	2.5e-25
Gh_D01G0731	54.2162	-2.31316	0.300483	-7.69814	1.38e-14	2.86e-13
Gh_D10G1166	2203.19	-2.31316	0.187454	-12.3398	5.53e-35	4.27e-33
Gh_D05G0635	3587.52	-2.31287	0.112405	-20.5761	4.49e-94	2.88e-91
Gh_D09G1660	93.8304	-2.31148	0.274466	-8.42175	3.71e-17	9.5e-16
Gh_A01G0716	71.9174	-2.31062	0.315747	-7.31794	2.52e-13	4.63e-12
Gh_A05G3609	7.18742	-2.31004	0.536106	-4.30892	1.64e-05	0.000102024
Gh_D12G2235	88.8619	-2.31001	0.321364	-7.18815	6.57e-13	1.15e-11
Gh_D12G2651	43.309	-2.30978	0.429779	-5.37434	7.69e-08	7.12e-07
Gh_A03G1239	32.7784	-2.3096	0.402645	-5.73607	9.69e-09	1.03e-07
Gh_D13G1926	24.5714	-2.30952	0.535442	-4.3133	1.61e-05	0.000100186
Gh_D01G0926	18.6627	-2.30696	0.380595	-6.06145	1.35e-09	1.6e-08
Gh_A13G0496	99.1749	-2.30402	0.296515	-7.77031	7.83e-15	1.66e-13
Gh_A11G3109	74.7229	-2.30159	0.322345	-7.14015	9.32e-13	1.61e-11
Gh_A11G2259	20781.7	-2.30122	0.343941	-6.69075	2.22e-11	3.28e-10
Gh_D05G1140	441.607	-2.29913	0.178162	-12.9047	4.23e-38	3.83e-36
Gh_D12G0600	378.879	-2.29633	0.20793	-11.0438	2.35e-28	1.3e-26
Gh_D07G1663	75992.3	-2.29532	0.222458	-10.318	5.85e-25	2.66e-23
Gh_D09G1997	3646.32	-2.29499	0.121497	-18.8892	1.4e-79	5.29e-77
Gh_D04G1337	6.02286	-2.29404	0.533635	-4.29889	1.72e-05	0.000106288
Gh_A05G1447	1440.45	-2.2938	0.156359	-14.6701	1e-48	1.4e-46
Gh_A02G0609	15.4099	-2.29197	0.480989	-4.76511	1.89e-06	1.4e-05
Gh_D05G0169	65.1042	-2.29055	0.297809	-7.69135	1.46e-14	3.01e-13
Gh_A09G1403	75.5645	-2.2899	0.361457	-6.33521	2.37e-10	3.11e-09
Gh_A05G0516	3602.6	-2.2884	0.103401	-22.1313	1.58e-108	1.54e-105
Gh_A02G1462	54.9192	-2.28706	0.273677	-8.35677	6.45e-17	1.62e-15
Gh_A11G3022	49.3239	-2.28654	0.34632	-6.6024	4.05e-11	5.79e-10
Gh_D01G0347	2148.92	-2.28098	0.173632	-13.1368	2.03e-39	1.94e-37
Gh_D07G1306	34.3522	-2.28089	0.334199	-6.82494	8.8e-12	1.36e-10
Gh_A12G2112	126.639	-2.28081	0.298228	-7.64787	2.04e-14	4.17e-13
Gh_A08G1094	203.833	-2.27888	0.254443	-8.95636	3.36e-19	1e-17
Gh_D12G2401	227.817	-2.27888	0.273273	-8.33919	7.48e-17	1.88e-15
Gh_D13G0367	784.526	-2.27854	0.423102	-5.38534	7.23e-08	6.74e-07
Gh_D03G0425	5215.9	-2.2777	0.10161	-22.4161	2.74e-111	2.91e-108
Gh_D05G1598	691.806	-2.27694	0.225458	-10.0992	5.57e-24	2.38e-22
Gh_D06G1895	42.7587	-2.27474	0.29416	-7.73298	1.05e-14	2.2e-13
Gh_A11G0316	148.448	-2.27277	0.214082	-10.6164	2.5e-26	1.23e-24
Gh_A05G1338	280.619	-2.27259	0.257607	-8.82193	1.13e-18	3.22e-17
Gh_D13G1737	2.90863	-2.27061	0.531653	-4.27085	1.95e-05	0.000119243
Gh_A11G1500	236.629	-2.27053	0.269994	-8.40956	4.12e-17	1.05e-15
Gh_A05G2957	370.455	-2.27037	0.245533	-9.24668	2.32e-20	7.59e-19
Gh_A12G2421	11.2801	-2.27025	0.528008	-4.29965	1.71e-05	0.000105955
Gh_A07G0196	17.1412	-2.26895	0.520725	-4.35729	1.32e-05	8.35e-05
Gh_A12G0193	1225.44	-2.26844	0.157321	-14.4192	3.92e-47	5.13e-45
Gh_D07G2352	768.331	-2.26591	0.18551	-12.2145	2.6e-34	1.95e-32
Gh_D10G2292	307.553	-2.26584	0.226879	-9.98697	1.74e-23	7.18e-22
Gh_A12G1274	69.8392	-2.26522	0.228405	-9.91755	3.49e-23	1.41e-21
Gh_D03G1342	348.465	-2.26497	0.296516	-7.63861	2.2e-14	4.46e-13
Gh_A11G3067	63.1734	-2.26414	0.317107	-7.13999	9.33e-13	1.61e-11
Gh_D08G2761	216.498	-2.26406	0.28161	-8.03969	9.01e-16	2.08e-14
Gh_D02G2444	4.864	-2.26341	0.53179	-4.25621	2.08e-05	0.000126631
Gh_D12G1385	922.675	-2.25918	0.196338	-11.5066	1.22e-30	7.67e-29
Gh_D09G0576	1860	-2.25532	0.204142	-11.0478	2.25e-28	1.24e-26
Gh_A13G2060	372.916	-2.25471	0.16947	-13.3045	2.18e-40	2.15e-38
Gh_D11G0371	262.374	-2.25295	0.158945	-14.1744	1.32e-45	1.64e-43
Gh_D11G1504	70729.4	-2.25242	0.187153	-12.0352	2.32e-33	1.66e-31
Gh_A10G1531	436.682	-2.25177	0.235505	-9.56146	1.16e-21	4.2e-20
Gh_D05G0120	1837.82	-2.24959	0.19218	-11.7056	1.19e-31	7.79e-30
Gh_A11G3189	47.6525	-2.24886	0.325241	-6.91445	4.7e-12	7.46e-11
Gh_D05G1111	684.453	-2.24818	0.230333	-9.76055	1.66e-22	6.38e-21
Gh_A10G0562	66.8313	-2.24584	0.41451	-5.41805	6.03e-08	5.7e-07
Gh_A07G0298	576.571	-2.24515	0.188213	-11.9288	8.38e-33	5.84e-31
Gh_D11G3304	1306.66	-2.2427	0.21673	-10.3479	4.28e-25	1.96e-23
Gh_A02G1815	14.7966	-2.24145	0.459773	-4.87512	1.09e-06	8.36e-06
Gh_A12G2177	94.7795	-2.23897	0.432939	-5.17155	2.32e-07	1.99e-06
Gh_A04G0721	9.81684	-2.23802	0.512317	-4.36842	1.25e-05	7.98e-05
Gh_Sca004822G01	397.59	-2.23604	0.206283	-10.8396	2.23e-27	1.17e-25
Gh_A10G0763	218.532	-2.2356	0.378992	-5.8988	3.66e-09	4.12e-08
Gh_D02G1608	940.069	-2.23511	0.155821	-14.3441	1.16e-46	1.49e-44
Gh_D06G1799	58634.2	-2.23494	0.155766	-14.3481	1.09e-46	1.41e-44
Gh_D06G0337	2582.19	-2.23454	0.167353	-13.3523	1.15e-40	1.15e-38
Gh_D02G1144	978.471	-2.2327	0.161635	-13.8132	2.12e-43	2.37e-41
Gh_D07G2171	638.996	-2.23152	0.188214	-11.8563	2e-32	1.35e-30
Gh_A09G0776	22.5919	-2.23078	0.535695	-4.16428	3.12e-05	0.000183147
Gh_D03G1661	121.139	-2.22929	0.247176	-9.01904	1.9e-19	5.81e-18
Gh_D13G2047	11166.2	-2.22868	0.10584	-21.057	1.97e-98	1.44e-95
Gh_D01G1901	22.8084	-2.22839	0.428294	-5.20296	1.96e-07	1.7e-06
Gh_A11G3190	14985.6	-2.22719	0.14479	-15.3823	2.15e-53	3.52e-51
Gh_A02G0729	171.786	-2.2234	0.285425	-7.78979	6.71e-15	1.43e-13
Gh_Sca005242G01	319.805	-2.22333	0.194263	-11.445	2.49e-30	1.53e-28
Gh_D09G1728	1036.9	-2.22272	0.145561	-15.2701	1.21e-52	1.93e-50
Gh_A12G1728	174.619	-2.22255	0.253616	-8.76346	1.89e-18	5.34e-17
Gh_A05G2194	29.069	-2.22227	0.472137	-4.70684	2.52e-06	1.82e-05
Gh_D11G1893	3.45806	-2.22168	0.532681	-4.17075	3.04e-05	0.000178453
Gh_A03G0473	705.166	-2.2201	0.172967	-12.8355	1.04e-37	9.28e-36
Gh_D12G2356	95.5574	-2.21767	0.419727	-5.28359	1.27e-07	1.13e-06
Gh_D05G1349	227.183	-2.21393	0.207352	-10.6772	1.3e-26	6.47e-25
Gh_A05G0994	241.843	-2.21372	0.240065	-9.22132	2.93e-20	9.56e-19
Gh_D09G1078	983.018	-2.21247	0.171239	-12.9204	3.45e-38	3.14e-36
Gh_A11G2099	7.91821	-2.20844	0.488885	-4.5173	6.26e-06	4.23e-05
Gh_D09G1652	479.93	-2.20805	0.177441	-12.4438	1.51e-35	1.21e-33
Gh_A03G1339	43.8314	-2.2069	0.323487	-6.82225	8.96e-12	1.38e-10
Gh_A05G0063	1222.58	-2.20585	0.199425	-11.0611	1.94e-28	1.08e-26
Gh_D03G1747	1757.01	-2.20446	0.14078	-15.6589	2.89e-55	5e-53
Gh_A11G2891	85.5238	-2.20412	0.390696	-5.64152	1.69e-08	1.73e-07
Gh_A02G0682	14.9728	-2.20254	0.477909	-4.6087	4.05e-06	2.84e-05
Gh_D05G1847	12.5388	-2.19718	0.534264	-4.11253	3.91e-05	0.000224371
Gh_A05G0725	14216.5	-2.19441	0.163919	-13.3872	7.19e-41	7.34e-39
Gh_Sca020646G01	9.47352	-2.19328	0.533134	-4.11394	3.89e-05	0.000223223
Gh_A09G0888	48.8281	-2.19269	0.317468	-6.9068	4.96e-12	7.86e-11
Gh_A02G0227	217.668	-2.19154	0.221169	-9.90891	3.81e-23	1.53e-21
Gh_D05G1103	1398.3	-2.19059	0.151011	-14.5062	1.11e-47	1.48e-45
Gh_D06G1324	10.9587	-2.18973	0.523783	-4.18061	2.91e-05	0.000171703
Gh_A07G0074	43.9016	-2.18828	0.354782	-6.16796	6.92e-10	8.55e-09
Gh_A09G1945	397.078	-2.18792	0.270966	-8.07454	6.77e-16	1.58e-14
Gh_A13G1697	8368.6	-2.18709	0.135469	-16.1446	1.24e-58	2.38e-56
Gh_D07G1346	9.22513	-2.18665	0.52835	-4.13863	3.49e-05	0.000202505
Gh_A12G0583	562.112	-2.18516	0.364291	-5.99839	1.99e-09	2.32e-08
Gh_A05G2785	134.152	-2.18491	0.375567	-5.81764	5.97e-09	6.53e-08
Gh_D04G1632	37.8627	-2.17996	0.516764	-4.21849	2.46e-05	0.000147446
Gh_D07G0256	11.0351	-2.17697	0.508051	-4.28494	1.83e-05	0.00011256
Gh_D02G2335	23.7277	-2.17606	0.455744	-4.77474	1.8e-06	1.34e-05
Gh_D08G1570	15.5183	-2.17541	0.447195	-4.86457	1.15e-06	8.79e-06
Gh_D09G1501	2522.95	-2.17525	0.156631	-13.8878	7.52e-44	8.62e-42
Gh_D02G2099	1324.06	-2.17206	0.160415	-13.5402	9.05e-42	9.58e-40
Gh_D12G0456	761.456	-2.17139	0.20195	-10.7521	5.79e-27	2.96e-25
Gh_Sca018564G01	15.516	-2.17079	0.473	-4.5894	4.45e-06	3.09e-05
Gh_Sca033877G01	334.48	-2.17052	0.210873	-10.293	7.58e-25	3.43e-23
Gh_D06G0543	5.75208	-2.16991	0.534711	-4.05809	4.95e-05	0.00027776
Gh_A07G2041	207.906	-2.16985	0.237954	-9.11878	7.6e-20	2.4e-18
Gh_D05G0916	7.77838	-2.16859	0.51056	-4.24748	2.16e-05	0.000131147
Gh_A01G0826	5519.76	-2.16704	0.228308	-9.49177	2.27e-21	8.05e-20
Gh_D05G2169	594.672	-2.16622	0.281629	-7.69176	1.45e-14	3e-13
Gh_D04G1957	933.891	-2.16507	0.371602	-5.82631	5.67e-09	6.22e-08
Gh_D13G1445	4597.6	-2.16491	0.156026	-13.8753	8.95e-44	1.02e-41
Gh_A12G1371	216.033	-2.16462	0.234201	-9.2426	2.41e-20	7.88e-19
Gh_A12G0258	6.48195	-2.16049	0.536906	-4.02396	5.72e-05	0.000316975
Gh_A12G2415	19.1639	-2.15877	0.48033	-4.49435	6.98e-06	4.67e-05
Gh_A13G0809	1363.49	-2.15755	0.236357	-9.12837	6.95e-20	2.21e-18
Gh_D11G1003	657.337	-2.15698	0.111782	-19.2962	5.78e-83	2.44e-80
Gh_D03G1716	59.1182	-2.15696	0.25606	-8.42365	3.65e-17	9.35e-16
Gh_D06G1343	45.0702	-2.15582	0.353995	-6.08998	1.13e-09	1.36e-08
Gh_A06G1163	202.712	-2.15316	0.255692	-8.42091	3.74e-17	9.56e-16
Gh_A10G1528	978.452	-2.1527	0.168172	-12.8006	1.63e-37	1.44e-35
Gh_D09G1698	17.6731	-2.15266	0.500042	-4.30495	1.67e-05	0.000103694
Gh_A11G1205	469.923	-2.15263	0.185569	-11.6002	4.11e-31	2.64e-29
Gh_D07G0625	7.5807	-2.15019	0.52769	-4.07472	4.61e-05	0.000260524
Gh_A11G2590	5.65984	-2.14988	0.536037	-4.0107	6.05e-05	0.000333484
Gh_D06G0674	112.585	-2.14983	0.415307	-5.17649	2.26e-07	1.94e-06
Gh_D11G2971	273.335	-2.1488	0.234238	-9.17358	4.58e-20	1.47e-18
Gh_A09G1427	115.903	-2.14625	0.42534	-5.04596	4.51e-07	3.71e-06
Gh_D04G2023	70.9997	-2.1457	0.352439	-6.08815	1.14e-09	1.37e-08
Gh_D09G1514	655.699	-2.14526	0.155876	-13.7627	4.27e-43	4.73e-41
Gh_A07G0082	24.4528	-2.14499	0.4562	-4.70186	2.58e-06	1.87e-05
Gh_D04G0052	209.92	-2.14314	0.212385	-10.0908	6.07e-24	2.58e-22
Gh_A12G2719	422.651	-2.14015	0.228952	-9.34757	8.97e-21	3.02e-19
Gh_D02G2192	987.277	-2.13896	0.159081	-13.4457	3.26e-41	3.37e-39
Gh_D04G1299	65.5338	-2.13763	0.27595	-7.74645	9.45e-15	1.99e-13
Gh_D10G2193	194.04	-2.13738	0.440848	-4.84834	1.25e-06	9.48e-06
Gh_A09G1414	508.254	-2.13546	0.252469	-8.45832	2.71e-17	7.02e-16
Gh_D11G2469	44.1777	-2.13394	0.425897	-5.01046	5.43e-07	4.41e-06
Gh_A03G1838	14.5383	-2.13263	0.444301	-4.79996	1.59e-06	1.19e-05
Gh_D12G2494	1632.97	-2.13037	0.308618	-6.90294	5.09e-12	8.06e-11
Gh_Sca078204G01	9.4386	-2.13007	0.53028	-4.01689	5.9e-05	0.00032565
Gh_A10G1144	301.858	-2.12996	0.296621	-7.18074	6.93e-13	1.21e-11
Gh_D04G0270	99.4907	-2.12796	0.213593	-9.96266	2.22e-23	9.1e-22
Gh_A13G2034	9.20539	-2.12752	0.512548	-4.15087	3.31e-05	0.000193109
Gh_D02G1336	12.5473	-2.12687	0.533987	-3.98301	6.8e-05	0.000370233
Gh_D13G0071	354.29	-2.12665	0.233626	-9.1028	8.8e-20	2.77e-18
Gh_Sca113166G01	84.467	-2.12583	0.257051	-8.27008	1.34e-16	3.3e-15
Gh_A05G3329	11563.3	-2.12061	0.110854	-19.1298	1.43e-81	5.62e-79
Gh_A11G0906	6.76146	-2.12038	0.537457	-3.9452	7.97e-05	0.000427582
Gh_A05G3738	16.0786	-2.11991	0.464483	-4.56403	5.02e-06	3.45e-05
Gh_A03G0854	1076.35	-2.1182	0.146207	-14.4877	1.45e-47	1.93e-45
Gh_D02G2034	75.2843	-2.118	0.310747	-6.81583	9.37e-12	1.44e-10
Gh_A12G0993	26.4435	-2.11593	0.458891	-4.61096	4.01e-06	2.81e-05
Gh_A09G1558	333.111	-2.11521	0.208797	-10.1305	4.05e-24	1.75e-22
Gh_D03G1014	497.65	-2.11485	0.364959	-5.79476	6.84e-09	7.41e-08
Gh_A08G1807	71.9943	-2.1148	0.31725	-6.66606	2.63e-11	3.84e-10
Gh_D08G1711	100.289	-2.11411	0.333159	-6.34566	2.21e-10	2.92e-09
Gh_D12G0015	55.6723	-2.1137	0.333212	-6.34339	2.25e-10	2.96e-09
Gh_D07G0418	47.7613	-2.11274	0.368312	-5.73628	9.68e-09	1.03e-07
Gh_D07G2099	263.256	-2.11028	0.465118	-4.53709	5.7e-06	3.88e-05
Gh_A09G1776	215.988	-2.10881	0.253589	-8.31587	9.11e-17	2.27e-15
Gh_D12G2500	2782.42	-2.10761	0.148188	-14.2225	6.64e-46	8.35e-44
Gh_A05G0267	258.765	-2.10703	0.524854	-4.0145	5.96e-05	0.000328582
Gh_D05G1112	307.573	-2.10671	0.170573	-12.3507	4.83e-35	3.75e-33
Gh_D10G2527	285.588	-2.10577	0.26767	-7.86704	3.63e-15	7.96e-14
Gh_A06G0637	735.442	-2.10538	0.13334	-15.7896	3.67e-56	6.52e-54
Gh_D06G2375	248.638	-2.10536	0.300712	-7.00126	2.54e-12	4.16e-11
Gh_A03G1233	1081.46	-2.10493	0.23209	-9.06945	1.2e-19	3.71e-18
Gh_D12G1111	167.134	-2.10345	0.185275	-11.3531	7.16e-30	4.29e-28
Gh_D05G3770	581.803	-2.1022	0.35455	-5.92921	3.04e-09	3.47e-08
Gh_Sca093878G01	158.817	-2.09608	0.247791	-8.45906	2.7e-17	6.98e-16
Gh_A05G1497	681.76	-2.09599	0.210591	-9.95286	2.45e-23	1e-21
Gh_D04G0305	762.399	-2.09276	0.205963	-10.1608	2.97e-24	1.29e-22
Gh_A06G0593	108.509	-2.09269	0.419869	-4.98416	6.22e-07	5e-06
Gh_A13G0328	876.474	-2.09185	0.356632	-5.86556	4.48e-09	4.97e-08
Gh_D03G0876	20444.6	-2.09167	0.127466	-16.4096	1.63e-60	3.26e-58
Gh_Sca123119G01	3189.53	-2.09084	0.416083	-5.02505	5.03e-07	4.1e-06
Gh_A01G1188	19.232	-2.09079	0.42511	-4.91825	8.73e-07	6.83e-06
Gh_A06G0308	1429.91	-2.09008	0.15097	-13.8443	1.38e-43	1.56e-41
Gh_D01G0854	11303.5	-2.08769	0.211973	-9.84884	6.93e-23	2.73e-21
Gh_D07G1594	122.886	-2.08751	0.336169	-6.20968	5.31e-10	6.65e-09
Gh_A03G1836	35.7158	-2.08668	0.359941	-5.79729	6.74e-09	7.31e-08
Gh_A09G2051	173.71	-2.08654	0.295513	-7.06074	1.66e-12	2.78e-11
Gh_D08G1164	63.2556	-2.08546	0.483281	-4.31521	1.59e-05	9.94e-05
Gh_A02G1135	12.4707	-2.08526	0.481247	-4.33303	1.47e-05	9.22e-05
Gh_D01G0979	211.688	-2.08428	0.287834	-7.24126	4.45e-13	7.96e-12
Gh_D08G1568	1005.7	-2.08371	0.247028	-8.43513	3.31e-17	8.51e-16
Gh_D09G1717	465.01	-2.08353	0.146705	-14.2022	8.87e-46	1.11e-43
Gh_D03G0893	91.2072	-2.08325	0.313015	-6.65543	2.82e-11	4.11e-10
Gh_A05G3743	1078.96	-2.08131	0.230516	-9.02895	1.73e-19	5.33e-18
Gh_A04G0058	2569.21	-2.08088	0.217009	-9.58892	8.9e-22	3.24e-20
Gh_D02G0992	104.085	-2.08088	0.512227	-4.06242	4.86e-05	0.000273078
Gh_D07G0446	20.4947	-2.07912	0.405648	-5.12544	2.97e-07	2.51e-06
Gh_A09G1632	308.054	-2.07728	0.136381	-15.2315	2.19e-52	3.43e-50
Gh_A05G1679	187.188	-2.07643	0.198552	-10.4579	1.35e-25	6.33e-24
Gh_D02G1716	54.5828	-2.07457	0.357561	-5.80202	6.55e-09	7.12e-08
Gh_A13G0810	2524.82	-2.07359	0.231398	-8.96115	3.21e-19	9.64e-18
Gh_Sca004822G02	21.6532	-2.07335	0.360828	-5.7461	9.13e-09	9.73e-08
Gh_A06G0838	121.501	-2.07253	0.302563	-6.84991	7.39e-12	1.15e-10
Gh_D03G0351	56.3272	-2.06939	0.267569	-7.73404	1.04e-14	2.19e-13
Gh_D03G1068	598.032	-2.0686	0.181997	-11.3661	6.17e-30	3.71e-28
Gh_Sca031504G01	2.6014	-2.06799	0.469531	-4.40437	1.06e-05	6.87e-05
Gh_A05G2108	67972.8	-2.06714	0.159119	-12.9912	1.37e-38	1.27e-36
Gh_A13G0025	22.1026	-2.06574	0.5095	-4.05444	5.03e-05	0.000281753
Gh_A12G1550	1249.62	-2.06499	0.228589	-9.03363	1.66e-19	5.11e-18
Gh_A12G0827	354.698	-2.06461	0.248509	-8.30798	9.73e-17	2.42e-15
Gh_A11G1386	1062.16	-2.06454	0.141096	-14.6322	1.75e-48	2.41e-46
Gh_A01G0963	164.689	-2.06438	0.161536	-12.7797	2.13e-37	1.87e-35
Gh_D09G0247	320.342	-2.063	0.291262	-7.08299	1.41e-12	2.38e-11
Gh_D03G1748	16.1462	-2.06177	0.473061	-4.35836	1.31e-05	8.32e-05
Gh_A05G1940	42.7138	-2.06038	0.27894	-7.38648	1.51e-13	2.83e-12
Gh_Sca058827G01	429.112	-2.06016	0.259201	-7.94812	1.89e-15	4.25e-14
Gh_A10G1968	257.323	-2.05976	0.260235	-7.91501	2.47e-15	5.5e-14
Gh_D04G1389	135.065	-2.05867	0.406411	-5.06549	4.07e-07	3.37e-06
Gh_A11G2168	70.4757	-2.05846	0.341154	-6.03382	1.6e-09	1.89e-08
Gh_D05G2382	7.17004	-2.05726	0.522454	-3.93769	8.23e-05	0.000439693
Gh_D09G1057	179.981	-2.05716	0.223963	-9.18527	4.11e-20	1.32e-18
Gh_A06G1554	593.788	-2.05677	0.195215	-10.5359	5.9e-26	2.83e-24
Gh_D12G2364	669.602	-2.05642	0.164707	-12.4854	8.97e-36	7.23e-34
Gh_A05G2646	605.885	-2.05212	0.149562	-13.7209	7.61e-43	8.31e-41
Gh_A12G1755	142.781	-2.05209	0.284031	-7.22489	5.02e-13	8.93e-12
Gh_A05G1098	244.823	-2.05197	0.208956	-9.8201	9.23e-23	3.61e-21
Gh_D09G0655	2230.05	-2.05107	0.135816	-15.1018	1.58e-51	2.42e-49
Gh_A05G0534	943.407	-2.05105	0.107004	-19.1681	6.84e-82	2.75e-79
Gh_A11G0862	1139.14	-2.04974	0.146251	-14.0153	1.26e-44	1.48e-42
Gh_A05G2490	309.356	-2.04891	0.342966	-5.9741	2.31e-09	2.68e-08
Gh_D13G2461	182.245	-2.04888	0.232315	-8.81941	1.15e-18	3.28e-17
Gh_D05G1281	21.645	-2.04887	0.453911	-4.51382	6.37e-06	4.29e-05
Gh_A09G1931	399.278	-2.04837	0.387415	-5.28728	1.24e-07	1.11e-06
Gh_A11G0317	1197.65	-2.04723	0.128509	-15.9307	3.88e-57	7.07e-55
Gh_D05G3065	956.118	-2.04712	0.267793	-7.64444	2.1e-14	4.27e-13
Gh_A08G1418	2331.32	-2.04663	0.105839	-19.3373	2.61e-83	1.12e-80
Gh_D12G0054	3284.95	-2.04581	0.154029	-13.282	2.95e-40	2.9e-38
Gh_D05G2224	56.44	-2.04441	0.365614	-5.5917	2.25e-08	2.26e-07
Gh_A11G3242	9.96795	-2.04338	0.492539	-4.14867	3.34e-05	0.000194761
Gh_A08G1439	618.239	-2.04328	0.139438	-14.6536	1.28e-48	1.78e-46
Gh_A08G1419	142.019	-2.04104	0.284059	-7.18527	6.71e-13	1.18e-11
Gh_D13G1963	288.177	-2.04092	0.266896	-7.64686	2.06e-14	4.2e-13
Gh_D01G1802	50.9862	-2.04084	0.319104	-6.39554	1.6e-10	2.15e-09
Gh_A09G0653	1254.77	-2.04005	0.140453	-14.5248	8.44e-48	1.14e-45
Gh_D12G2376	324.268	-2.04002	0.168839	-12.0827	1.3e-33	9.46e-32
Gh_D01G0302	25.7493	-2.03946	0.487742	-4.18144	2.9e-05	0.000171109
Gh_D13G2431	339.63	-2.0391	0.172376	-11.8293	2.75e-32	1.86e-30
Gh_D10G0211	104.708	-2.03851	0.231933	-8.78921	1.51e-18	4.27e-17
Gh_A11G2982	2285.48	-2.03546	0.100373	-20.2791	1.97e-91	1.14e-88
Gh_A02G0180	20.7861	-2.03405	0.51977	-3.91336	9.1e-05	0.000480722
Gh_A01G0015	63.6529	-2.03375	0.380221	-5.34887	8.85e-08	8.12e-07
Gh_A07G0136	144.782	-2.03347	0.281906	-7.21328	5.46e-13	9.67e-12
Gh_D11G1879	3.43003	-2.03132	0.534834	-3.79803	0.000145852	0.000731858
Gh_A12G0991	124.604	-2.03126	0.200785	-10.1166	4.66e-24	2.01e-22
Gh_A07G1752	308.271	-2.03088	0.185965	-10.9207	9.18e-28	4.9e-26
Gh_D12G2372	64.2409	-2.03038	0.281141	-7.22193	5.13e-13	9.11e-12
Gh_A03G1236	99.9721	-2.02932	0.333974	-6.07626	1.23e-09	1.47e-08
Gh_D09G1407	101.574	-2.02908	0.320655	-6.32792	2.48e-10	3.25e-09
Gh_D09G2342	360.342	-2.02607	0.266541	-7.60133	2.93e-14	5.87e-13
Gh_D10G1656	2672.85	-2.02453	0.151297	-13.3812	7.79e-41	7.94e-39
Gh_D07G1834	245.033	-2.02235	0.242237	-8.34863	6.91e-17	1.74e-15
Gh_A08G2485	969.204	-2.02232	0.262953	-7.69079	1.46e-14	3.02e-13
Gh_D05G0747	812.511	-2.02172	0.208404	-9.70093	2.99e-22	1.12e-20
Gh_A11G0773	7.65206	-2.01914	0.536111	-3.76627	0.000165702	0.000822682
Gh_D05G2550	15.8446	-2.0183	0.456071	-4.4254	9.63e-06	6.28e-05
Gh_A08G2083	15.9875	-2.0179	0.535277	-3.76983	0.000163356	0.000812074
Gh_A10G1971	5406.92	-2.01765	0.200201	-10.0782	6.9e-24	2.92e-22
Gh_D13G1939	2428.49	-2.01758	0.0992327	-20.3318	6.73e-92	4e-89
Gh_A12G1648	74.3843	-2.01631	0.306249	-6.58388	4.58e-11	6.53e-10
Gh_A05G0107	114.885	-2.01471	0.233029	-8.64575	5.35e-18	1.45e-16
Gh_D09G2009	40.4524	-2.01411	0.283689	-7.09972	1.25e-12	2.13e-11
Gh_A03G1578	7.34166	-2.01401	0.500663	-4.02269	5.75e-05	0.00031848
Gh_A11G0861	492.579	-2.01396	0.142164	-14.1664	1.48e-45	1.82e-43
Gh_D08G0109	983.058	-2.01388	0.271837	-7.40842	1.28e-13	2.41e-12
Gh_A10G1196	1055.89	-2.01364	0.120428	-16.7208	9.25e-63	1.97e-60
Gh_D13G0421	285.873	-2.01331	0.162688	-12.3753	3.56e-35	2.77e-33
Gh_D12G1143	245.038	-2.01308	0.261732	-7.69139	1.46e-14	3.01e-13
Gh_D11G2278	19154	-2.01074	0.143057	-14.0555	7.13e-45	8.53e-43
Gh_A12G1592	165.075	-2.01048	0.16764	-11.9929	3.87e-33	2.74e-31
Gh_D08G2470	136.679	-2.00968	0.193893	-10.3649	3.58e-25	1.64e-23
Gh_A01G1634	21510	-2.00914	0.115826	-17.3461	2.11e-67	5.23e-65
Gh_A11G0323	20.75	-2.00606	0.347326	-5.77574	7.66e-09	8.24e-08
Gh_A10G2220	209.757	-2.00485	0.196001	-10.2288	1.47e-24	6.53e-23
Gh_D13G1617	34.0502	-2.00438	0.536412	-3.73663	0.000186501	0.000914572
Gh_A12G2229	433.179	-2.00355	0.205181	-9.76478	1.59e-22	6.12e-21
Gh_D03G0894	36.0435	-2.00225	0.304772	-6.56966	5.04e-11	7.16e-10
Gh_A10G0292	26.8622	-2.00204	0.424767	-4.71326	2.44e-06	1.77e-05
Gh_A01G1846	159.023	-2.00159	0.178155	-11.2351	2.74e-29	1.6e-27
Gh_A12G2365	2804.42	-2.00115	0.190747	-10.4911	9.49e-26	4.48e-24
Gh_D02G1653	7254.54	-2.00018	0.138054	-14.4884	1.43e-47	1.91e-45
Gh_D09G1435	127.696	-1.99969	0.350458	-5.70594	1.16e-08	1.22e-07
Gh_A05G0585	4248.53	-1.99949	0.141991	-14.0818	4.91e-45	5.93e-43
Gh_D10G1779	1751.6	-1.9989	0.111321	-17.9562	4.29e-72	1.25e-69
Gh_D02G1153	402.587	-1.99787	0.245604	-8.13451	4.14e-16	9.85e-15
Gh_A06G0488	11.3294	-1.9977	0.523525	-3.81586	0.000135709	0.000686041
Gh_D02G1788	36.4676	-1.99759	0.421238	-4.7422	2.11e-06	1.55e-05
Gh_D01G0668	149.738	-1.99757	0.231401	-8.63251	6e-18	1.62e-16
Gh_D08G0006	460.775	-1.99701	0.296463	-6.7361	1.63e-11	2.44e-10
Gh_A09G1036	704.846	-1.9965	0.18593	-10.738	6.75e-27	3.43e-25
Gh_D09G0057	9.57947	-1.99624	0.533843	-3.73937	0.000184484	0.000905521
Gh_D10G1172	116.817	-1.99465	0.259454	-7.68788	1.5e-14	3.08e-13
Gh_A12G0992	10.1824	-1.99461	0.519618	-3.83862	0.000123728	0.000631113
Gh_A02G0069	160.259	-1.99268	0.260099	-7.66124	1.84e-14	3.77e-13
Gh_D11G0959	51.1187	-1.99223	0.345009	-5.77441	7.72e-09	8.3e-08
Gh_A09G2394	285.9	-1.99189	0.214657	-9.27939	1.7e-20	5.65e-19
Gh_D02G1270	15.59	-1.99033	0.52554	-3.78721	0.000152348	0.000762092
Gh_D06G0094	93.3753	-1.99016	0.322903	-6.16335	7.12e-10	8.79e-09
Gh_A12G1591	285.407	-1.98947	0.182345	-10.9105	1.03e-27	5.48e-26
Gh_D05G1751	1525.74	-1.98852	0.14491	-13.7224	7.46e-43	8.17e-41
Gh_D06G0718	15.4803	-1.98786	0.480424	-4.13773	3.51e-05	0.000203224
Gh_D02G1673	635.682	-1.98693	0.163367	-12.1624	4.93e-34	3.66e-32
Gh_A02G1512	66.5072	-1.98513	0.393026	-5.05088	4.4e-07	3.62e-06
Gh_A12G1575	199.837	-1.98508	0.43521	-4.56119	5.09e-06	3.49e-05
Gh_D12G0735	33.1215	-1.98427	0.453745	-4.37311	1.22e-05	7.82e-05
Gh_A08G0557	16.1235	-1.98259	0.41673	-4.7575	1.96e-06	1.45e-05
Gh_A07G0355	326.925	-1.97917	0.228644	-8.65615	4.88e-18	1.33e-16
Gh_Sca017089G01	1528.93	-1.97749	0.134459	-14.707	5.81e-49	8.21e-47
Gh_D06G2239	338.841	-1.97663	0.487703	-4.05295	5.06e-05	0.000283235
Gh_A08G1276	600.792	-1.97661	0.269413	-7.33674	2.19e-13	4.04e-12
Gh_A02G1131	49.6734	-1.97646	0.295233	-6.69458	2.16e-11	3.2e-10
Gh_A09G1738	814.346	-1.97528	0.219549	-8.99699	2.32e-19	7.04e-18
Gh_D01G0807	140.186	-1.97511	0.282545	-6.99041	2.74e-12	4.47e-11
Gh_A05G3980	624.896	-1.97476	0.156581	-12.6117	1.82e-36	1.52e-34
Gh_A10G0204	50.0561	-1.97452	0.314329	-6.28171	3.35e-10	4.3e-09
Gh_D09G1525	110.519	-1.97408	0.285071	-6.92486	4.36e-12	6.96e-11
Gh_D07G0563	23.4255	-1.974	0.424523	-4.64992	3.32e-06	2.35e-05
Gh_A05G3608	829.976	-1.97329	0.152418	-12.9466	2.46e-38	2.25e-36
Gh_A10G1622	62.5208	-1.97325	0.271732	-7.26174	3.82e-13	6.88e-12
Gh_D11G1910	159.99	-1.97323	0.223053	-8.84644	9.04e-19	2.61e-17
Gh_D11G0902	61.8816	-1.97241	0.406426	-4.85306	1.22e-06	9.28e-06
Gh_A05G2423	338.058	-1.97193	0.28146	-7.00609	2.45e-12	4.02e-11
Gh_A01G1681	34.7148	-1.96927	0.380181	-5.17983	2.22e-07	1.91e-06
Gh_D01G1082	892.809	-1.96839	0.18333	-10.7369	6.83e-27	3.46e-25
Gh_D06G1519	1206.82	-1.96754	0.209224	-9.40401	5.25e-21	1.81e-19
Gh_D02G0201	49.4226	-1.96733	0.345147	-5.69998	1.2e-08	1.26e-07
Gh_A11G0237	39.3295	-1.96673	0.419666	-4.68642	2.78e-06	2e-05
Gh_A05G1360	37.3434	-1.96553	0.324289	-6.06104	1.35e-09	1.61e-08
Gh_A07G0317	156.111	-1.9649	0.267001	-7.35915	1.85e-13	3.44e-12
Gh_D03G0185	76.4561	-1.964	0.316771	-6.20005	5.64e-10	7.05e-09
Gh_A09G1502	3070.3	-1.96275	0.226724	-8.65697	4.84e-18	1.32e-16
Gh_D04G0145	2241.49	-1.959	0.195101	-10.0409	1.01e-23	4.23e-22
Gh_A04G1441	9.81895	-1.95891	0.519042	-3.77408	0.000160601	0.000799536
Gh_D10G1767	850.637	-1.95837	0.292489	-6.69555	2.15e-11	3.18e-10
Gh_A09G0434	151.033	-1.95722	0.353721	-5.53323	3.14e-08	3.09e-07
Gh_D06G0394	21.9224	-1.95699	0.473907	-4.12949	3.64e-05	0.000209811
Gh_A13G0598	7.44681	-1.95694	0.525213	-3.72599	0.00019455	0.00094957
Gh_D08G2603	23.7863	-1.956	0.530782	-3.68512	0.000228593	0.00109808
Gh_A13G2336	862.206	-1.95554	0.148628	-13.1573	1.55e-39	1.49e-37
Gh_A04G0252	152.154	-1.9547	0.353904	-5.52325	3.33e-08	3.27e-07
Gh_D10G1101	472.259	-1.95406	0.171554	-11.3904	4.67e-30	2.83e-28
Gh_A05G2242	121.988	-1.953	0.288249	-6.77537	1.24e-11	1.89e-10
Gh_D11G0552	33.4618	-1.95148	0.387213	-5.0398	4.66e-07	3.82e-06
Gh_A13G0222	19594	-1.95107	0.171818	-11.3554	6.97e-30	4.18e-28
Gh_D06G1610	294.729	-1.95054	0.399243	-4.88559	1.03e-06	7.96e-06
Gh_A13G1410	644.052	-1.95038	0.131022	-14.8859	4.07e-50	5.95e-48
Gh_D07G0339	113.323	-1.94972	0.363878	-5.35816	8.41e-08	7.74e-07
Gh_A05G2808	250.257	-1.94967	0.215001	-9.06816	1.21e-19	3.76e-18
Gh_A11G3031	3.81173	-1.94895	0.52797	-3.69141	0.000223015	0.001075
Gh_A02G0126	615.485	-1.94864	0.146057	-13.3416	1.33e-40	1.33e-38
Gh_A04G0114	1557.14	-1.94854	0.201042	-9.69219	3.25e-22	1.22e-20
Gh_A03G1743	401.968	-1.94808	0.293628	-6.63454	3.26e-11	4.71e-10
Gh_D07G1184	136.659	-1.94746	0.219698	-8.86426	7.7e-19	2.23e-17
Gh_A05G1003	16.6424	-1.94724	0.395607	-4.92216	8.56e-07	6.71e-06
Gh_D10G1603	21.0181	-1.94632	0.456797	-4.26079	2.04e-05	0.000124269
Gh_D04G1662	892.004	-1.94614	0.27703	-7.02501	2.14e-12	3.54e-11
Gh_A07G2227	500.326	-1.94503	0.394366	-4.93206	8.14e-07	6.41e-06
Gh_D05G3676	5.99951	-1.94448	0.536779	-3.62249	0.000291785	0.00136617
Gh_D01G0893	373.211	-1.94383	0.163595	-11.882	1.47e-32	1e-30
Gh_D13G0964	12.7669	-1.94304	0.489652	-3.96822	7.24e-05	0.000391962
Gh_A05G1930	1888.06	-1.94301	0.334104	-5.81559	6.04e-09	6.6e-08
Gh_D05G0718	1962.93	-1.9424	0.22556	-8.61148	7.21e-18	1.94e-16
Gh_D10G1817	105.879	-1.93768	0.209135	-9.2652	1.95e-20	6.42e-19
Gh_D05G2486	586.606	-1.93698	0.149769	-12.9331	2.93e-38	2.67e-36
Gh_A08G0247	22.7973	-1.93452	0.446249	-4.33508	1.46e-05	9.14e-05
Gh_A07G1950	369.524	-1.93449	0.167845	-11.5255	9.82e-31	6.2e-29
Gh_D11G2201	49.9195	-1.93428	0.352668	-5.48471	4.14e-08	4.01e-07
Gh_A03G1618	2727.99	-1.93407	0.211635	-9.13869	6.32e-20	2.02e-18
Gh_D11G1571	299.569	-1.93368	0.272285	-7.10167	1.23e-12	2.1e-11
Gh_A07G0078	33.5928	-1.9308	0.50556	-3.81913	0.000133922	0.000678008
Gh_A12G0039	3412.67	-1.92986	0.146955	-13.1323	2.15e-39	2.05e-37
Gh_D11G1004	900.725	-1.92919	0.160778	-11.9991	3.59e-33	2.54e-31
Gh_A11G1910	812.018	-1.92746	0.291659	-6.6086	3.88e-11	5.57e-10
Gh_A10G0238	371.715	-1.92695	0.435524	-4.42445	9.67e-06	6.31e-05
Gh_D09G0319	4.54907	-1.92638	0.536922	-3.58782	0.000333453	0.00154072
Gh_D09G1080	498.567	-1.92572	0.21019	-9.16177	5.11e-20	1.64e-18
Gh_D05G2162	3937.23	-1.9235	0.326301	-5.89486	3.75e-09	4.22e-08
Gh_A01G1403	12134	-1.92311	0.184852	-10.4035	2.39e-25	1.11e-23
Gh_D12G1848	930.999	-1.92298	0.191058	-10.0649	7.9e-24	3.33e-22
Gh_D11G1275	54.1644	-1.92243	0.374714	-5.1304	2.89e-07	2.45e-06
Gh_A05G4022	66.28	-1.9217	0.339346	-5.66296	1.49e-08	1.54e-07
Gh_D03G0694	8.49043	-1.92156	0.47619	-4.03529	5.45e-05	0.000303563
Gh_D02G0873	146.48	-1.91973	0.35683	-5.37996	7.45e-08	6.92e-07
Gh_D12G0021	27.7667	-1.91851	0.456895	-4.19902	2.68e-05	0.0001595
Gh_D12G2675	239.772	-1.91807	0.211077	-9.08705	1.02e-19	3.18e-18
Gh_A12G0031	166.289	-1.91615	0.268806	-7.12837	1.02e-12	1.74e-11
Gh_D07G2059	534.525	-1.9161	0.208265	-9.20029	3.57e-20	1.16e-18
Gh_A08G0957	450.726	-1.91551	0.363336	-5.27202	1.35e-07	1.2e-06
Gh_A10G1680	184.633	-1.91486	0.170446	-11.2345	2.76e-29	1.61e-27
Gh_D05G2504	109.691	-1.91368	0.283885	-6.74103	1.57e-11	2.36e-10
Gh_D13G0395	37.3599	-1.91273	0.399404	-4.78897	1.68e-06	1.25e-05
Gh_A09G0239	155.753	-1.91205	0.286118	-6.68271	2.35e-11	3.45e-10
Gh_D02G0404	67.8938	-1.91165	0.301869	-6.3327	2.41e-10	3.16e-09
Gh_A05G0620	587.742	-1.91153	0.153425	-12.459	1.25e-35	1e-33
Gh_A11G1764	580.377	-1.91058	0.163515	-11.6845	1.53e-31	9.92e-30
Gh_D12G1396	40.9328	-1.91021	0.285065	-6.70094	2.07e-11	3.07e-10
Gh_D06G1781	1971.47	-1.91001	0.173565	-11.0046	3.63e-28	1.99e-26
Gh_D12G2444	2.31543	-1.90972	0.531986	-3.58978	0.000330954	0.00152966
Gh_D07G1112	408.148	-1.90944	0.197687	-9.65894	4.51e-22	1.67e-20
Gh_D10G2406	127.849	-1.90941	0.209404	-9.11832	7.63e-20	2.41e-18
Gh_D11G1699	956.721	-1.90941	0.10225	-18.674	8.06e-78	2.92e-75
Gh_A05G1022	677.227	-1.90938	0.15018	-12.714	4.94e-37	4.26e-35
Gh_Sca130242G01	12.6694	-1.90908	0.534564	-3.57129	0.000355229	0.00163094
Gh_A05G1931	4013.97	-1.90851	0.327731	-5.82342	5.77e-09	6.33e-08
Gh_A05G1818	974.554	-1.90846	0.124099	-15.3786	2.28e-53	3.71e-51
Gh_A12G2413	200.217	-1.90771	0.173278	-11.0095	3.44e-28	1.89e-26
Gh_D05G3699	295.291	-1.90617	0.433451	-4.39766	1.09e-05	7.06e-05
Gh_D05G0786	317.222	-1.90572	0.341191	-5.58549	2.33e-08	2.34e-07
Gh_D03G0021	23150.1	-1.90562	0.203508	-9.36383	7.69e-21	2.62e-19
Gh_A10G0212	291.543	-1.90409	0.22769	-8.36265	6.13e-17	1.54e-15
Gh_A07G2128	38.1558	-1.90283	0.493845	-3.85309	0.000116634	0.000598752
Gh_A05G3047	7902.98	-1.90044	0.121038	-15.7011	1.49e-55	2.6e-53
Gh_A04G1182	303.04	-1.90034	0.155534	-12.2182	2.49e-34	1.87e-32
Gh_A11G3044	141.745	-1.89985	0.485332	-3.91454	9.06e-05	0.000478687
Gh_A05G3064	3008.47	-1.89981	0.147788	-12.855	8.07e-38	7.22e-36
Gh_A02G0060	4.29579	-1.89947	0.454347	-4.18067	2.91e-05	0.000171674
Gh_A05G0024	13.9044	-1.89909	0.449698	-4.22305	2.41e-05	0.000144766
Gh_D08G1677	950.052	-1.89905	0.15037	-12.6291	1.46e-36	1.23e-34
Gh_A11G1267	929.071	-1.89845	0.151277	-12.5495	4e-36	3.28e-34
Gh_D11G2115	508.039	-1.89763	0.142023	-13.3615	1.02e-40	1.02e-38
Gh_A11G0167	32.964	-1.89725	0.346008	-5.48328	4.18e-08	4.04e-07
Gh_D06G0324	28.0677	-1.89672	0.399764	-4.74459	2.09e-06	1.54e-05
Gh_D06G1486	12.5512	-1.89629	0.531748	-3.56615	0.000362269	0.00166044
Gh_A11G0069	5.8382	-1.89628	0.534862	-3.54537	0.000392064	0.00178104
Gh_D11G0821	81.8015	-1.89566	0.315178	-6.01455	1.8e-09	2.11e-08
Gh_A09G1633	92.09	-1.89518	0.187233	-10.1221	4.41e-24	1.9e-22
Gh_D12G1761	9.85466	-1.89493	0.530112	-3.57458	0.000350793	0.00161266
Gh_D13G2167	18.7992	-1.89454	0.396643	-4.77643	1.78e-06	1.33e-05
Gh_D12G0332	934.605	-1.89361	0.148406	-12.7597	2.75e-37	2.4e-35
Gh_D08G2760	2.77311	-1.89258	0.518879	-3.64745	0.000264861	0.00125299
Gh_D08G1888	2194.88	-1.89234	0.112144	-16.8742	6.96e-64	1.53e-61
Gh_Sca005237G01	115.422	-1.89151	0.326461	-5.79397	6.87e-09	7.44e-08
Gh_A04G0887	29.3828	-1.89022	0.436991	-4.32553	1.52e-05	9.51e-05
Gh_D10G1185	2425.03	-1.88792	0.149966	-12.589	2.43e-36	2.01e-34
Gh_D11G1377	117.504	-1.88769	0.236063	-7.99656	1.28e-15	2.93e-14
Gh_A09G0059	1095.76	-1.88738	0.133618	-14.1252	2.66e-45	3.24e-43
Gh_D04G0004	7.09141	-1.8867	0.538257	-3.5052	0.000456262	0.00203509
Gh_A10G0863	7.002	-1.88596	0.534433	-3.52891	0.000417283	0.0018811
Gh_A11G1149	169.091	-1.88587	0.241536	-7.80784	5.82e-15	1.25e-13
Gh_D11G0372	2089.98	-1.88494	0.115407	-16.333	5.75e-60	1.13e-57
Gh_D11G0758	490.911	-1.88427	0.166908	-11.2893	1.48e-29	8.77e-28
Gh_D10G1174	354.046	-1.88347	0.225945	-8.33597	7.69e-17	1.92e-15
Gh_D04G0497	7.4429	-1.88292	0.536575	-3.50914	0.000449566	0.0020083
Gh_D06G2120	4.52785	-1.88237	0.528306	-3.56303	0.000366593	0.00167749
Gh_Sca009965G02	146.039	-1.88224	0.225737	-8.33818	7.54e-17	1.89e-15
Gh_D04G0256	183.888	-1.88123	0.480691	-3.91359	9.09e-05	0.000480304
Gh_D07G1090	6266.13	-1.88087	0.192463	-9.7726	1.48e-22	5.69e-21
Gh_A12G1246	12.3214	-1.87998	0.522583	-3.59748	0.000321321	0.00148939
Gh_A11G1567	49.1052	-1.87964	0.301453	-6.23527	4.51e-10	5.71e-09
Gh_D05G3478	5138.53	-1.87946	0.188638	-9.96333	2.21e-23	9.05e-22
Gh_D10G0655	1732.11	-1.87941	0.107659	-17.457	3.04e-68	8.03e-66
Gh_A09G1397	603.924	-1.87843	0.264357	-7.10567	1.2e-12	2.04e-11
Gh_A06G0783	2043.96	-1.87788	0.245676	-7.64371	2.11e-14	4.29e-13
Gh_A09G2135	214.501	-1.87734	0.384159	-4.8869	1.02e-06	7.91e-06
Gh_D01G1828	22830.8	-1.87514	0.10775	-17.4028	7.86e-68	2.02e-65
Gh_A09G0492	38.2054	-1.87406	0.345368	-5.42628	5.75e-08	5.46e-07
Gh_A10G1615	86.1928	-1.87378	0.276692	-6.77206	1.27e-11	1.93e-10
Gh_A12G1258	1283.48	-1.87126	0.18842	-9.93129	3.04e-23	1.23e-21
Gh_D05G0963	220.228	-1.86849	0.194938	-9.58505	9.24e-22	3.36e-20
Gh_Sca190873G01	2.47233	-1.8681	0.518359	-3.60388	0.000313505	0.00145629
Gh_Sca201290G01	4.26272	-1.86572	0.534123	-3.49305	0.000477541	0.00212043
Gh_A01G1316	36.6057	-1.86531	0.351293	-5.30985	1.1e-07	9.9e-07
Gh_A04G0830	41.5123	-1.86499	0.436439	-4.27321	1.93e-05	0.000118075
Gh_D04G0821	96.6749	-1.86303	0.308671	-6.03563	1.58e-09	1.87e-08
Gh_D05G2361	76190.9	-1.86262	0.153495	-12.1347	6.91e-34	5.08e-32
Gh_D04G1777	43.2746	-1.86235	0.487676	-3.81883	0.000134085	0.000678539
Gh_D09G0369	104.54	-1.86202	0.266674	-6.98239	2.9e-12	4.72e-11
Gh_D12G2716	602.552	-1.86128	0.175837	-10.5853	3.49e-26	1.7e-24
Gh_D12G0195	2115.96	-1.86095	0.159295	-11.6824	1.57e-31	1.02e-29
Gh_A13G1619	2336.34	-1.86089	0.118715	-15.6752	2.23e-55	3.88e-53
Gh_A12G0086	46.1897	-1.86	0.343541	-5.4142	6.16e-08	5.81e-07
Gh_D06G1939	2079.23	-1.85971	0.355752	-5.22755	1.72e-07	1.51e-06
Gh_D02G2248	147.73	-1.85844	0.32423	-5.73187	9.93e-09	1.05e-07
Gh_D12G0951	134.382	-1.85831	0.229679	-8.09089	5.92e-16	1.39e-14
Gh_D12G0026	54.779	-1.85779	0.415145	-4.47504	7.64e-06	5.07e-05
Gh_D11G0496	21.28	-1.85748	0.401248	-4.62926	3.67e-06	2.59e-05
Gh_D11G2783	30.6356	-1.85724	0.433305	-4.28621	1.82e-05	0.000111976
Gh_A12G1605	5.40045	-1.85632	0.52539	-3.53322	0.000410531	0.00185554
Gh_A12G0333	411.974	-1.85581	0.207498	-8.94374	3.76e-19	1.12e-17
Gh_A07G0634	1556.46	-1.85574	0.118701	-15.6337	4.29e-55	7.34e-53
Gh_Sca006253G01	11.5123	-1.85524	0.52618	-3.52586	0.000422106	0.00189975
Gh_A02G1086	1109.83	-1.85492	0.146867	-12.63	1.44e-36	1.22e-34
Gh_Sca059538G01	7.53868	-1.85456	0.488567	-3.79591	0.000147102	0.000737561
Gh_D11G1785	49.0872	-1.85435	0.340334	-5.44861	5.08e-08	4.85e-07
Gh_A05G2765	802.246	-1.85384	0.258494	-7.17172	7.41e-13	1.29e-11
Gh_D05G1337	31.3941	-1.85384	0.392733	-4.72035	2.35e-06	1.72e-05
Gh_A11G1229	129.186	-1.85247	0.23966	-7.72959	1.08e-14	2.26e-13
Gh_D07G0193	10.4443	-1.85178	0.462855	-4.00079	6.31e-05	0.000346296
Gh_A13G0173	38.8439	-1.85141	0.50438	-3.67067	0.000241919	0.00115505
Gh_A11G0975	69.2885	-1.85126	0.478123	-3.87195	0.00010797	0.000559248
Gh_A06G1690	870.217	-1.85126	0.241255	-7.67342	1.67e-14	3.44e-13
Gh_D05G1870	599.984	-1.8511	0.223907	-8.26725	1.37e-16	3.38e-15
Gh_D03G0076	332.729	-1.85003	0.189038	-9.78658	1.29e-22	4.98e-21
Gh_D07G0059	1043.23	-1.84943	0.12724	-14.535	7.28e-48	9.84e-46
Gh_Sca016160G01	2.55293	-1.84904	0.531453	-3.47921	0.000502897	0.00221934
Gh_D13G0233	216.263	-1.84691	0.445628	-4.1445	3.41e-05	0.000197844
Gh_D05G0584	440.032	-1.84591	0.233485	-7.90591	2.66e-15	5.9e-14
Gh_D06G1313	33.7378	-1.84557	0.332004	-5.55888	2.72e-08	2.7e-07
Gh_A10G1656	543.351	-1.84531	0.171	-10.7913	3.78e-27	1.96e-25
Gh_A05G2618	3382.42	-1.84372	0.171491	-10.7511	5.86e-27	2.99e-25
Gh_D03G0970	50.5448	-1.84274	0.330167	-5.58124	2.39e-08	2.4e-07
Gh_A08G1278	97.9949	-1.84256	0.225798	-8.16019	3.34e-16	8e-15
Gh_D05G1620	1140.18	-1.84203	0.131255	-14.034	9.66e-45	1.15e-42
Gh_A11G2459	417.388	-1.8416	0.193793	-9.50295	2.04e-21	7.27e-20
Gh_D10G1869	17.6901	-1.84149	0.524796	-3.50897	0.000449844	0.00200893
Gh_D05G0860	22264.2	-1.84088	0.157323	-11.7012	1.26e-31	8.2e-30
Gh_Sca009965G01	15.3382	-1.84057	0.38964	-4.72377	2.32e-06	1.69e-05
Gh_D04G1663	1671.4	-1.84033	0.256232	-7.18228	6.86e-13	1.2e-11
Gh_D09G1220	1399.71	-1.83983	0.100941	-18.2268	3.16e-74	1e-71
Gh_D12G2674	138.683	-1.83955	0.283348	-6.49221	8.46e-11	1.17e-09
Gh_D08G1802	176.459	-1.83915	0.31333	-5.86969	4.37e-09	4.86e-08
Gh_D07G1058	308.09	-1.83881	0.18896	-9.73123	2.22e-22	8.42e-21
Gh_A05G1455	4162.45	-1.83873	0.142814	-12.875	6.23e-38	5.6e-36
Gh_D05G0307	17.7644	-1.83852	0.468069	-3.92788	8.57e-05	0.00045617
Gh_D08G1733	792.023	-1.83748	0.113094	-16.2474	2.33e-59	4.53e-57
Gh_A12G1033	18.3936	-1.83694	0.503827	-3.64597	0.000266382	0.00125947
Gh_D09G0289	50.0746	-1.83638	0.328971	-5.5822	2.37e-08	2.38e-07
Gh_D12G0018	97.0461	-1.83635	0.254414	-7.21796	5.28e-13	9.36e-12
Gh_A03G1258	2158.02	-1.83588	0.109241	-16.8057	2.22e-63	4.78e-61
Gh_D10G2196	22.622	-1.83568	0.446435	-4.11188	3.92e-05	0.000224899
Gh_D05G1317	47.1498	-1.8353	0.42341	-4.33457	1.46e-05	9.16e-05
Gh_A06G0592	335.201	-1.83496	0.237777	-7.71715	1.19e-14	2.48e-13
Gh_A03G1218	4539.99	-1.83446	0.151855	-12.0803	1.34e-33	9.7e-32
Gh_D01G2312	58.8873	-1.83428	0.428285	-4.28285	1.85e-05	0.000113539
Gh_D10G1784	38.383	-1.83313	0.389127	-4.71087	2.47e-06	1.79e-05
Gh_A13G1135	12.4501	-1.83305	0.483136	-3.79405	0.000148207	0.000742844
Gh_D11G0085	653.812	-1.83196	0.372275	-4.92098	8.61e-07	6.74e-06
Gh_A05G0266	924.995	-1.83171	0.179562	-10.201	1.96e-24	8.65e-23
Gh_D11G3271	35.3994	-1.83013	0.43667	-4.19111	2.78e-05	0.000164576
Gh_D12G0976	13.588	-1.82942	0.521323	-3.50919	0.000449468	0.00200802
Gh_D05G1668	590.764	-1.82814	0.166403	-10.9862	4.45e-28	2.42e-26
Gh_D05G0387	222.41	-1.82786	0.210426	-8.68648	3.74e-18	1.03e-16
Gh_A08G1382	880.983	-1.82719	0.174717	-10.458	1.35e-25	6.33e-24
Gh_D08G2060	189.522	-1.82686	0.192625	-9.48403	2.45e-21	8.65e-20
Gh_D02G0663	4.08317	-1.8267	0.537092	-3.4011	0.000671155	0.00287926
Gh_A04G1294	1134.22	-1.82662	0.247951	-7.36688	1.75e-13	3.26e-12
Gh_D06G0837	81.0277	-1.82524	0.328255	-5.56044	2.69e-08	2.68e-07
Gh_D04G0102	10.9607	-1.8241	0.489929	-3.7232	0.000196716	0.000959348
Gh_D10G2599	27.7098	-1.82369	0.402973	-4.52558	6.02e-06	4.08e-05
Gh_D01G2079	6.4958	-1.82328	0.532257	-3.42556	0.000613526	0.00265588
Gh_D04G0391	104.586	-1.82325	0.351141	-5.19237	2.08e-07	1.79e-06
Gh_D10G0489	49.2145	-1.8232	0.323002	-5.64454	1.66e-08	1.71e-07
Gh_A02G0165	40.3122	-1.82256	0.419705	-4.34247	1.41e-05	8.87e-05
Gh_A06G1159	18.2952	-1.82253	0.45146	-4.03698	5.41e-05	0.000301593
Gh_A06G0363	23.999	-1.81962	0.449187	-4.05091	5.1e-05	0.00028549
Gh_D13G1207	8.9304	-1.81903	0.517033	-3.51822	0.00043446	0.00194873
Gh_D09G2452	659.279	-1.81881	0.146296	-12.4323	1.74e-35	1.39e-33
Gh_A09G0077	12.1116	-1.81865	0.482114	-3.77223	0.000161794	0.00080513
Gh_D12G2176	273.219	-1.81781	0.227295	-7.99761	1.27e-15	2.91e-14
Gh_A08G2216	7.09963	-1.81772	0.534111	-3.40327	0.000665843	0.00285753
Gh_D03G0338	138.081	-1.81729	0.178026	-10.208	1.83e-24	8.05e-23
Gh_D11G2561	123.385	-1.81689	0.37559	-4.83741	1.32e-06	9.97e-06
Gh_A06G1523	2595.31	-1.81679	0.224773	-8.08275	6.33e-16	1.48e-14
Gh_A05G1229	75.176	-1.81631	0.336046	-5.40492	6.48e-08	6.1e-07
Gh_A05G0531	34.5121	-1.81506	0.402017	-4.51489	6.33e-06	4.27e-05
Gh_A06G0047	312.806	-1.81447	0.158731	-11.4311	2.92e-30	1.79e-28
Gh_A01G2047	45.3785	-1.81416	0.417991	-4.34019	1.42e-05	8.95e-05
Gh_D07G0441	335.807	-1.81349	0.381534	-4.75315	2e-06	1.48e-05
Gh_D11G2299	2456.43	-1.81224	0.111932	-16.1906	5.87e-59	1.13e-56
Gh_A07G0015	263.094	-1.81223	0.185298	-9.78007	1.37e-22	5.29e-21
Gh_D05G1321	66.9669	-1.8116	0.361971	-5.00482	5.59e-07	4.53e-06
Gh_D04G1432	20.0539	-1.81107	0.425621	-4.25513	2.09e-05	0.00012715
Gh_A12G1164	12.0622	-1.81092	0.485108	-3.73303	0.00018919	0.000926279
Gh_D02G2366	28452.8	-1.80953	0.144841	-12.4932	8.13e-36	6.58e-34
Gh_A07G0973	704.591	-1.80925	0.214016	-8.45381	2.82e-17	7.29e-16
Gh_A12G2357	2699.16	-1.80896	0.339568	-5.32725	9.97e-08	9.06e-07
Gh_D13G0825	329.164	-1.80856	0.147253	-12.282	1.13e-34	8.6e-33
Gh_D12G2111	2005.39	-1.80856	0.100314	-18.029	1.15e-72	3.45e-70
Gh_D05G1020	9.53832	-1.80843	0.512551	-3.52829	0.000418256	0.00188461
Gh_A02G0642	296.77	-1.80788	0.17494	-10.3343	4.93e-25	2.25e-23
Gh_A05G3401	219.369	-1.80737	0.257859	-7.00914	2.4e-12	3.94e-11
Gh_A03G1835	4.48434	-1.80713	0.533715	-3.38595	0.000709323	0.00302676
Gh_D11G1416	591.504	-1.80593	0.197251	-9.15546	5.41e-20	1.73e-18
Gh_D05G2406	9.7723	-1.8045	0.466359	-3.86932	0.000109138	0.000564395
Gh_D06G1220	71.0414	-1.80359	0.404966	-4.45368	8.44e-06	5.56e-05
Gh_D02G2414	8.74392	-1.80279	0.507018	-3.55568	0.00037701	0.00172017
Gh_D09G0377	543.952	-1.80268	0.215475	-8.36605	5.96e-17	1.5e-15
Gh_D05G3933	169.164	-1.80209	0.171494	-10.5082	7.92e-26	3.77e-24
Gh_A01G1160	1926.76	-1.80182	0.223095	-8.07646	6.67e-16	1.56e-14
Gh_D10G2040	33.9883	-1.80155	0.349004	-5.16198	2.44e-07	2.09e-06
Gh_D10G0162	262.856	-1.80154	0.412832	-4.36387	1.28e-05	8.13e-05
Gh_A09G1537	17795.6	-1.79902	0.191492	-9.39479	5.73e-21	1.97e-19
Gh_D11G2017	1523.12	-1.79846	0.158312	-11.3602	6.6e-30	3.96e-28
Gh_D13G0962	30.0627	-1.79683	0.401211	-4.47852	7.52e-06	5e-05
Gh_D08G0917	48.3791	-1.79642	0.373843	-4.80527	1.55e-06	1.16e-05
Gh_A01G1806	90.8047	-1.7959	0.365048	-4.91963	8.67e-07	6.79e-06
Gh_A12G2025	128.233	-1.79572	0.202696	-8.85917	8.06e-19	2.34e-17
Gh_D06G1701	702.382	-1.79559	0.184966	-9.70773	2.8e-22	1.05e-20
Gh_D07G0440	60.638	-1.79548	0.455391	-3.94272	8.06e-05	0.000431518
Gh_D05G0507	2925.08	-1.79438	0.29176	-6.15019	7.74e-10	9.51e-09
Gh_A05G0870	471.54	-1.79426	0.2939	-6.105	1.03e-09	1.24e-08
Gh_A08G1573	11.4065	-1.79412	0.50413	-3.55884	0.000372491	0.00170194
Gh_D07G1300	23.693	-1.79345	0.388229	-4.61956	3.85e-06	2.7e-05
Gh_A06G1060	4.27565	-1.79336	0.533803	-3.35959	0.000780571	0.0032989
Gh_D03G0284	1450.99	-1.79327	0.0966997	-18.5447	8.99e-77	3.12e-74
Gh_A10G2064	3.10913	-1.79324	0.528903	-3.39049	0.000697671	0.0029827
Gh_A11G0061	3.76743	-1.79295	0.524092	-3.42107	0.00062376	0.00269461
Gh_Sca100178G01	5.19059	-1.79276	0.536692	-3.34039	0.000836611	0.00350877
Gh_A03G1542	1425.81	-1.79243	0.158052	-11.3408	8.24e-30	4.91e-28
Gh_A03G0591	21527.2	-1.79241	0.114678	-15.6299	4.55e-55	7.76e-53
Gh_A07G1205	25.6101	-1.79205	0.428957	-4.1777	2.94e-05	0.00017365
Gh_Sca004925G02	190.309	-1.79168	0.210913	-8.49488	1.98e-17	5.18e-16
Gh_A01G1513	36.7791	-1.79161	0.331538	-5.40392	6.52e-08	6.12e-07
Gh_A13G0554	2336.27	-1.79098	0.159044	-11.2609	2.05e-29	1.2e-27
Gh_D05G0357	725.305	-1.78995	0.53136	-3.36862	0.000755462	0.00320113
Gh_D11G2012	942.963	-1.7899	0.259247	-6.90424	5.05e-12	7.99e-11
Gh_D08G1320	488.398	-1.78909	0.306679	-5.83375	5.42e-09	5.96e-08
Gh_A11G1147	1460.28	-1.78699	0.184938	-9.66268	4.34e-22	1.61e-20
Gh_D05G1810	2049.19	-1.78679	0.1451	-12.3142	7.59e-35	5.81e-33
Gh_D05G1351	694.214	-1.78593	0.188303	-9.48434	2.44e-21	8.63e-20
Gh_A04G0879	925.291	-1.78591	0.147471	-12.1102	9.33e-34	6.81e-32
Gh_D03G1815	226.014	-1.78495	0.270137	-6.60758	3.91e-11	5.6e-10
Gh_A13G0481	152.339	-1.78482	0.2301	-7.75672	8.72e-15	1.84e-13
Gh_D09G0942	22.2782	-1.7844	0.468945	-3.80513	0.000141732	0.00071358
Gh_A06G1433	2588.81	-1.78389	0.232039	-7.68788	1.5e-14	3.08e-13
Gh_A02G1311	73.7186	-1.78275	0.349218	-5.10498	3.31e-07	2.78e-06
Gh_A12G0014	134.749	-1.7823	0.252819	-7.04973	1.79e-12	2.99e-11
Gh_A05G3720	3370.26	-1.78213	0.0884175	-20.1558	2.39e-90	1.32e-87
Gh_D09G1781	350.215	-1.78132	0.156087	-11.4124	3.63e-30	2.21e-28
Gh_A11G2261	512.236	-1.78037	0.234796	-7.58264	3.39e-14	6.74e-13
Gh_D10G0634	34.6624	-1.78022	0.465497	-3.82434	0.000131123	0.000665107
Gh_A05G2653	111.074	-1.77934	0.23762	-7.48819	6.98e-14	1.35e-12
Gh_A01G0632	55.3618	-1.77839	0.313814	-5.66703	1.45e-08	1.51e-07
Gh_A13G1231	713.215	-1.77833	0.159316	-11.1622	6.24e-29	3.53e-27
Gh_A12G0453	285.302	-1.77784	0.162975	-10.9086	1.05e-27	5.59e-26
Gh_A01G0448	9.06308	-1.77744	0.519786	-3.41957	0.000627201	0.00270824
Gh_A08G1597	46.9633	-1.77674	0.335028	-5.30325	1.14e-07	1.03e-06
Gh_A10G1850	1999.91	-1.77475	0.083841	-21.1681	1.88e-99	1.39e-96
Gh_A07G0221	81.6957	-1.77462	0.232421	-7.6354	2.25e-14	4.57e-13
Gh_D08G2140	959.131	-1.7738	0.187341	-9.46829	2.84e-21	1e-19
Gh_D12G0673	298.389	-1.77316	0.163735	-10.8295	2.5e-27	1.3e-25
Gh_D11G0394	448.239	-1.77306	0.189635	-9.34986	8.78e-21	2.96e-19
Gh_A12G0110	53.5752	-1.773	0.25252	-7.02125	2.2e-12	3.63e-11
Gh_D03G1269	12.4011	-1.77254	0.486606	-3.64266	0.000269832	0.00127368
Gh_D09G2419	1680.66	-1.77179	0.169192	-10.4721	1.16e-25	5.47e-24
Gh_D09G2063	8.33459	-1.77026	0.521844	-3.39231	0.000693055	0.00296471
Gh_A09G0689	309.675	-1.76987	0.278693	-6.3506	2.14e-10	2.83e-09
Gh_A03G1173	199.616	-1.76929	0.207634	-8.5212	1.58e-17	4.16e-16
Gh_Sca005244G01	454.694	-1.7688	0.171118	-10.3368	4.81e-25	2.2e-23
Gh_D01G2329	9.69326	-1.76823	0.503793	-3.50984	0.00044837	0.00200327
Gh_D10G2071	685.748	-1.76785	0.191906	-9.21206	3.2e-20	1.04e-18
Gh_D09G1637	223.394	-1.76746	0.285954	-6.18095	6.37e-10	7.91e-09
Gh_A11G0818	108.176	-1.76708	0.253147	-6.98044	2.94e-12	4.78e-11
Gh_A05G1494	2181.27	-1.7668	0.245887	-7.18539	6.7e-13	1.18e-11
Gh_A08G1707	11.081	-1.76637	0.499632	-3.53533	0.000407259	0.00184218
Gh_A09G0455	393.898	-1.76611	0.180283	-9.79632	1.17e-22	4.54e-21
Gh_A05G3108	815.46	-1.76561	0.212593	-8.30514	9.97e-17	2.48e-15
Gh_A03G1265	670.49	-1.76499	0.279736	-6.30947	2.8e-10	3.64e-09
Gh_A05G0889	18.3235	-1.76483	0.492822	-3.58108	0.000342176	0.00157703
Gh_A03G2136	245.15	-1.76471	0.280018	-6.30212	2.94e-10	3.8e-09
Gh_A10G0231	36.6362	-1.76365	0.420116	-4.198	2.69e-05	0.000160125
Gh_A10G0466	9.94324	-1.76279	0.49312	-3.57477	0.000350536	0.00161186
Gh_D05G3429	10.0329	-1.76254	0.53855	-3.27275	0.00106508	0.00435543
Gh_A11G3069	157.155	-1.76215	0.312633	-5.63647	1.74e-08	1.78e-07
Gh_A11G0985	729.734	-1.76096	0.194903	-9.03505	1.64e-19	5.05e-18
Gh_D12G2216	215.882	-1.75952	0.192967	-9.11822	7.64e-20	2.41e-18
Gh_D12G0693	623.282	-1.75935	0.162464	-10.8292	2.5e-27	1.31e-25
Gh_Sca120632G01	11.5579	-1.75931	0.495871	-3.54792	0.000388293	0.00176529
Gh_Sca018951G01	3.28223	-1.75851	0.536495	-3.27777	0.0010463	0.00428764
Gh_A02G0949	590.109	-1.75763	0.130732	-13.4445	3.32e-41	3.42e-39
Gh_A12G2016	1964.2	-1.75756	0.214815	-8.18175	2.8e-16	6.75e-15
Gh_A07G1202	57.097	-1.75607	0.314816	-5.57807	2.43e-08	2.44e-07
Gh_D03G1019	4.0214	-1.7551	0.53663	-3.27059	0.00107322	0.00438564
Gh_D02G2075	12.2738	-1.75349	0.489784	-3.58014	0.000343416	0.00158187
Gh_D06G1933	117.774	-1.75348	0.208873	-8.39495	4.66e-17	1.19e-15
Gh_Sca110429G01	100.636	-1.75288	0.309461	-5.66429	1.48e-08	1.53e-07
Gh_D05G1215	974.793	-1.75262	0.138858	-12.6217	1.6e-36	1.34e-34
Gh_A02G0179	721.267	-1.75233	0.160761	-10.9002	1.15e-27	6.12e-26
Gh_A11G2019	3776.74	-1.75228	0.110702	-15.8287	1.97e-56	3.54e-54
Gh_D05G2161	3083.39	-1.75212	0.31825	-5.5055	3.68e-08	3.59e-07
Gh_A11G2610	328.851	-1.75212	0.199952	-8.76271	1.91e-18	5.37e-17
Gh_D13G0961	11.1432	-1.75211	0.535551	-3.2716	0.00106941	0.0043719
Gh_D10G2251	300.235	-1.75197	0.228691	-7.66087	1.85e-14	3.78e-13
Gh_D09G1401	707.566	-1.75194	0.274329	-6.38626	1.7e-10	2.27e-09
Gh_D05G0909	8.23688	-1.75163	0.488093	-3.58871	0.000332316	0.00153571
Gh_D11G0739	121.56	-1.75156	0.289219	-6.05619	1.39e-09	1.65e-08
Gh_D03G0476	128.742	-1.75152	0.494243	-3.54385	0.00039433	0.00178967
Gh_D01G1967	2704.69	-1.7513	0.220703	-7.9351	2.1e-15	4.71e-14
Gh_D05G2036	51.9095	-1.75006	0.362575	-4.82675	1.39e-06	1.05e-05
Gh_D02G2032	1725.41	-1.74981	0.219174	-7.98366	1.42e-15	3.23e-14
Gh_D09G1843	7.10812	-1.74921	0.492727	-3.55006	0.000385141	0.00175274
Gh_A07G0985	248.187	-1.74873	0.173243	-10.0941	5.87e-24	2.51e-22
Gh_D12G0473	77.3633	-1.7484	0.294403	-5.93881	2.87e-09	3.28e-08
Gh_A09G1575	52.7521	-1.74772	0.295961	-5.90523	3.52e-09	3.97e-08
Gh_A04G0861	87.8747	-1.74755	0.311543	-5.60932	2.03e-08	2.06e-07
Gh_D02G0204	160.888	-1.74674	0.262473	-6.65492	2.83e-11	4.12e-10
Gh_A05G3190	56.3079	-1.74662	0.335521	-5.20569	1.93e-07	1.68e-06
Gh_A01G1053	53.6074	-1.74549	0.323114	-5.4021	6.59e-08	6.18e-07
Gh_D13G0389	13.9977	-1.74528	0.438829	-3.97714	6.97e-05	0.000378672
Gh_A12G1845	952.894	-1.74501	0.111314	-15.6764	2.19e-55	3.82e-53
Gh_D13G0236	15590	-1.74487	0.184998	-9.43183	4.03e-21	1.4e-19
Gh_A12G2363	2203.56	-1.74461	0.237945	-7.33199	2.27e-13	4.18e-12
Gh_D12G1153	188.361	-1.74377	0.193566	-9.00866	2.09e-19	6.35e-18
Gh_A05G2130	11.1916	-1.74344	0.46103	-3.78162	0.000155813	0.000777892
Gh_A12G0103	3.92223	-1.74179	0.53682	-3.24465	0.00117597	0.0047532
Gh_A06G0591	90.8587	-1.74077	0.240033	-7.25222	4.1e-13	7.36e-12
Gh_D07G0704	1342.8	-1.74004	0.1246	-13.965	2.55e-44	2.98e-42
Gh_D05G0857	13.0546	-1.73914	0.538602	-3.22898	0.00124231	0.00498713
Gh_A03G1927	30758.6	-1.73727	0.136247	-12.7508	3.08e-37	2.68e-35
Gh_A09G1462	20.7146	-1.73724	0.428572	-4.05354	5.04e-05	0.000282592
Gh_D04G1311	32.6654	-1.73711	0.369615	-4.69979	2.6e-06	1.88e-05
Gh_A09G1522	26.2805	-1.7363	0.518676	-3.34756	0.000815268	0.00342838
Gh_A05G3374	74.9428	-1.73576	0.465062	-3.73232	0.000189722	0.000928337
Gh_D03G0866	17.0552	-1.7342	0.503208	-3.44628	0.000568366	0.00247861
Gh_D03G1715	482.562	-1.73356	0.147878	-11.723	9.72e-32	6.38e-30
Gh_D04G0927	15.1005	-1.73339	0.518836	-3.34092	0.000835026	0.00350237
Gh_A11G1399	36.0317	-1.73314	0.433319	-3.99968	6.34e-05	0.000347597
Gh_D05G3087	88.7533	-1.73296	0.273314	-6.34056	2.29e-10	3.01e-09
Gh_D11G0596	832.655	-1.73288	0.145512	-11.9088	1.06e-32	7.34e-31
Gh_D07G0326	651.527	-1.73239	0.222228	-7.79555	6.41e-15	1.37e-13
Gh_D07G1502	42.606	-1.73199	0.361422	-4.79214	1.65e-06	1.23e-05
Gh_D01G1772	652.846	-1.73099	0.117821	-14.6918	7.28e-49	1.02e-46
Gh_A05G1144	11.8486	-1.7306	0.480767	-3.59966	0.000318637	0.00147812
Gh_A08G2236	852.176	-1.73026	0.32522	-5.32027	1.04e-07	9.39e-07
Gh_A11G1231	217.825	-1.73	0.170649	-10.1378	3.76e-24	1.63e-22
Gh_A09G1566	162.367	-1.72899	0.203597	-8.49223	2.03e-17	5.29e-16
Gh_D02G1518	27.0474	-1.72828	0.413637	-4.17825	2.94e-05	0.000173266
Gh_A07G2154	519.432	-1.72726	0.176504	-9.78599	1.29e-22	5e-21
Gh_A12G2038	167.963	-1.72721	0.214697	-8.04484	8.64e-16	2e-14
Gh_D13G2337	1012.37	-1.72611	0.115637	-14.9269	2.2e-50	3.27e-48
Gh_A06G0695	41.451	-1.72563	0.329725	-5.23354	1.66e-07	1.46e-06
Gh_A12G0707	219.707	-1.72472	0.243839	-7.0732	1.51e-12	2.55e-11
Gh_A03G0029	979.298	-1.72431	0.114931	-15.003	7.02e-51	1.06e-48
Gh_A10G0724	9.47468	-1.72334	0.500104	-3.44597	0.000569021	0.00248109
Gh_A04G1194	1782.76	-1.72298	0.134967	-12.766	2.54e-37	2.22e-35
Gh_A12G0261	60.8668	-1.72297	0.294854	-5.84349	5.11e-09	5.65e-08
Gh_A12G0245	62.3962	-1.72238	0.376598	-4.57353	4.8e-06	3.31e-05
Gh_A03G1896	40.1432	-1.72214	0.433776	-3.97012	7.18e-05	0.000389057
Gh_A03G0512	260.374	-1.72133	0.365229	-4.713	2.44e-06	1.77e-05
Gh_A01G0956	942.081	-1.72025	0.11038	-15.5849	9.22e-55	1.57e-52
Gh_A08G0830	76.6879	-1.72023	0.307483	-5.59457	2.21e-08	2.23e-07
Gh_D03G0250	33.9738	-1.72017	0.378634	-4.54309	5.54e-06	3.78e-05
Gh_A12G2448	234.275	-1.7198	0.267104	-6.4387	1.2e-10	1.64e-09
Gh_D12G0523	47.3221	-1.71899	0.376858	-4.56136	5.08e-06	3.49e-05
Gh_A11G2591	1103.85	-1.71893	0.1415	-12.1479	5.89e-34	4.35e-32
Gh_Sca130253G01	17.8431	-1.71824	0.503522	-3.41244	0.000643836	0.00277145
Gh_A12G0099	8254.34	-1.71765	0.114126	-15.0505	3.43e-51	5.19e-49
Gh_A08G1582	282.05	-1.71744	0.219011	-7.84178	4.44e-15	9.66e-14
Gh_D01G1012	155.397	-1.71655	0.152886	-11.2277	2.98e-29	1.73e-27
Gh_D11G2440	2018.69	-1.71645	0.198919	-8.62889	6.19e-18	1.67e-16
Gh_A13G0935	309.141	-1.71629	0.314935	-5.44966	5.05e-08	4.82e-07
Gh_A10G2292	6175.44	-1.7156	0.0948578	-18.086	4.11e-73	1.23e-70
Gh_A02G0341	1093.49	-1.71449	0.223044	-7.68678	1.51e-14	3.11e-13
Gh_A08G1516	140.807	-1.71293	0.264796	-6.46886	9.87e-11	1.36e-09
Gh_A09G0011	6.11034	-1.71168	0.536131	-3.19266	0.00140969	0.00556478
Gh_D04G1360	38.5801	-1.71148	0.348764	-4.90727	9.24e-07	7.2e-06
Gh_A09G1286	14.2095	-1.71143	0.470137	-3.64027	0.000272351	0.00128405
Gh_D13G0930	1181.87	-1.71133	0.145448	-11.766	5.85e-32	3.89e-30
Gh_D03G1182	281.909	-1.71064	0.238596	-7.16961	7.52e-13	1.31e-11
Gh_A07G2133	1480.99	-1.71021	0.388954	-4.39695	1.1e-05	7.08e-05
Gh_A11G1774	4031.49	-1.71011	0.134415	-12.7226	4.43e-37	3.82e-35
Gh_D11G1565	90.3569	-1.71002	0.369039	-4.63372	3.59e-06	2.54e-05
Gh_D02G1704	633.226	-1.70957	0.281574	-6.07149	1.27e-09	1.51e-08
Gh_D11G0734	671.655	-1.70909	0.259169	-6.59449	4.27e-11	6.1e-10
Gh_D01G0974	25.3261	-1.70845	0.394662	-4.32888	1.5e-05	9.38e-05
Gh_A12G0126	282.439	-1.70812	0.258787	-6.60049	4.1e-11	5.87e-10
Gh_A12G0473	659.999	-1.70807	0.110817	-15.4134	1.33e-53	2.18e-51
Gh_D04G1118	374.77	-1.70793	0.169703	-10.0642	7.95e-24	3.35e-22
Gh_D02G2247	39.1913	-1.70785	0.349186	-4.89094	1e-06	7.76e-06
Gh_D02G1774	82.7895	-1.70769	0.274102	-6.23013	4.66e-10	5.88e-09
Gh_A01G0035	252.249	-1.70753	0.133452	-12.795	1.75e-37	1.54e-35
Gh_A06G1312	109.28	-1.70743	0.371321	-4.59826	4.26e-06	2.97e-05
Gh_A01G0930	36.5731	-1.70721	0.383413	-4.45266	8.48e-06	5.59e-05
Gh_D11G2152	5.88051	-1.70709	0.529752	-3.22244	0.00127102	0.00508488
Gh_D01G0706	853.13	-1.70671	0.117049	-14.5811	3.7e-48	5.07e-46
Gh_D10G1605	2368.27	-1.70644	0.180422	-9.45804	3.14e-21	1.1e-19
Gh_A13G1123	1214.82	-1.7059	0.144609	-11.7967	4.06e-32	2.72e-30
Gh_D11G1252	1336.62	-1.70491	0.153948	-11.0746	1.67e-28	9.3e-27
Gh_D05G1624	284.996	-1.70454	0.244986	-6.9577	3.46e-12	5.58e-11
Gh_A05G1418	96.3666	-1.70435	0.365914	-4.65779	3.2e-06	2.27e-05
Gh_D07G0976	314.968	-1.70373	0.187973	-9.06367	1.26e-19	3.91e-18
Gh_A09G2068	1392.28	-1.70354	0.193091	-8.82245	1.12e-18	3.21e-17
Gh_D02G2269	32.9087	-1.70344	0.374723	-4.54588	5.47e-06	3.73e-05
Gh_A07G1237	4.96203	-1.70236	0.537152	-3.16923	0.00152843	0.00598956
Gh_A03G1172	394.467	-1.70233	0.170789	-9.96743	2.12e-23	8.7e-22
Gh_A11G1851	13.0831	-1.70166	0.481761	-3.53217	0.000412164	0.00186176
Gh_Sca098806G01	60.1163	-1.70093	0.44037	-3.8625	0.000112233	0.00057869
Gh_A10G0829	64.0583	-1.7008	0.342871	-4.96047	7.03e-07	5.6e-06
Gh_D04G0440	40.3942	-1.70079	0.372609	-4.56455	5.01e-06	3.44e-05
Gh_A01G1972	66393.5	-1.70051	0.143761	-11.8287	2.77e-32	1.87e-30
Gh_D11G2558	64.0679	-1.6999	0.307267	-5.53234	3.16e-08	3.11e-07
Gh_A07G0114	767.54	-1.69977	0.166858	-10.1869	2.27e-24	9.96e-23
Gh_D09G1780	12439.5	-1.69932	0.117399	-14.4748	1.75e-47	2.31e-45
Gh_A07G0244	1275.39	-1.69913	0.270486	-6.28178	3.35e-10	4.3e-09
Gh_D08G2577	160.137	-1.69855	0.259685	-6.5408	6.12e-11	8.62e-10
Gh_D08G1949	2557.49	-1.69811	0.214147	-7.92964	2.2e-15	4.91e-14
Gh_D12G0712	494.536	-1.69802	0.244206	-6.9532	3.57e-12	5.75e-11
Gh_A07G0308	903.68	-1.69733	0.102679	-16.5304	2.22e-61	4.55e-59
Gh_D10G0896	379.815	-1.69725	0.139261	-12.1876	3.62e-34	2.7e-32
Gh_D03G1156	53.3674	-1.69678	0.304413	-5.57394	2.49e-08	2.49e-07
Gh_D08G1167	66.2674	-1.69649	0.410465	-4.13309	3.58e-05	0.000207038
Gh_A08G1030	7.48921	-1.69557	0.529682	-3.20112	0.00136895	0.00542897
Gh_D09G2252	12.494	-1.69525	0.473254	-3.58211	0.000340835	0.0015716
Gh_D01G0090	192.707	-1.69523	0.190436	-8.90186	5.49e-19	1.61e-17
Gh_A10G2067	906.775	-1.69468	0.167797	-10.0995	5.55e-24	2.38e-22
Gh_D13G0083	2815.51	-1.69465	0.167936	-10.091	6.05e-24	2.58e-22
Gh_A04G1027	36.6003	-1.69432	0.383063	-4.42308	9.73e-06	6.34e-05
Gh_A11G1974	86.4162	-1.69415	0.246182	-6.88169	5.91e-12	9.27e-11
Gh_A01G1148	500.208	-1.6939	0.158333	-10.6984	1.04e-26	5.19e-25
Gh_D09G1547	1837.42	-1.69386	0.304082	-5.57043	2.54e-08	2.54e-07
Gh_D07G0287	4.94062	-1.69365	0.530897	-3.19016	0.00142192	0.00560661
Gh_A10G0443	304.421	-1.69293	0.231175	-7.32315	2.42e-13	4.46e-12
Gh_A11G0710	938.122	-1.6929	0.214133	-7.90582	2.66e-15	5.9e-14
Gh_D08G0816	43.3794	-1.69246	0.383776	-4.41002	1.03e-05	6.7e-05
Gh_D07G1296	19.741	-1.69132	0.471357	-3.5882	0.000332965	0.00153859
Gh_A10G1087	10.6448	-1.69074	0.480898	-3.51581	0.000438419	0.00196453
Gh_A07G2166	6.79754	-1.69003	0.512985	-3.2945	0.000985986	0.0040663
Gh_A05G2203	34.4927	-1.68996	0.402263	-4.20113	2.66e-05	0.000158182
Gh_D01G1644	14842.9	-1.68954	0.175381	-9.63354	5.77e-22	2.12e-20
Gh_D06G2010	100.41	-1.68874	0.221978	-7.60768	2.79e-14	5.61e-13
Gh_A02G1277	5.57306	-1.6885	0.537914	-3.13898	0.00169535	0.0065505
Gh_D12G0965	272.395	-1.68814	0.146927	-11.4897	1.49e-30	9.29e-29
Gh_D08G0205	18.6333	-1.68808	0.43223	-3.90552	9.4e-05	0.000495096
Gh_A10G0232	118.508	-1.6872	0.239244	-7.05224	1.76e-12	2.94e-11
Gh_D06G2019	9.95023	-1.68702	0.51962	-3.24664	0.00116777	0.004723
Gh_A12G1378	285.878	-1.687	0.225112	-7.49408	6.68e-14	1.3e-12
Gh_D05G0276	35.7298	-1.68687	0.356043	-4.73784	2.16e-06	1.59e-05
Gh_D12G2600	93.365	-1.68672	0.344264	-4.89948	9.61e-07	7.46e-06
Gh_A10G0403	200.678	-1.68534	0.24751	-6.80917	9.82e-12	1.51e-10
Gh_D12G1705	128.227	-1.68509	0.431114	-3.9087	9.28e-05	0.000489423
Gh_A12G2525	72.7006	-1.68428	0.418417	-4.02536	5.69e-05	0.000315374
Gh_A03G1718	218.427	-1.68388	0.48259	-3.48926	0.000484357	0.0021471
Gh_D05G3428	13.4384	-1.68319	0.537442	-3.13185	0.00173707	0.00669261
Gh_D01G1934	1782.76	-1.6829	0.221986	-7.5811	3.43e-14	6.82e-13
Gh_A12G2472	76.6043	-1.6825	0.329647	-5.10394	3.33e-07	2.79e-06
Gh_A05G0956	470.397	-1.68241	0.23247	-7.23712	4.58e-13	8.2e-12
Gh_D08G1927	218.91	-1.68231	0.225247	-7.46874	8.1e-14	1.56e-12
Gh_D05G1990	5.43157	-1.68169	0.534562	-3.14592	0.00165566	0.00641501
Gh_D11G2921	12.7411	-1.6816	0.508079	-3.30973	0.000933857	0.00386958
Gh_D12G0059	1034.96	-1.68132	0.135266	-12.4297	1.8e-35	1.44e-33
Gh_A03G1272	157.889	-1.68076	0.184125	-9.12838	6.95e-20	2.21e-18
Gh_A11G2031	8.02168	-1.68057	0.532366	-3.15679	0.00159519	0.0062158
Gh_D10G1484	5689	-1.68052	0.111585	-15.0604	2.95e-51	4.48e-49
Gh_A03G0479	2.93318	-1.68004	0.47465	-3.53954	0.00040082	0.0018153
Gh_A13G1022	67.7342	-1.67927	0.280246	-5.99213	2.07e-09	2.41e-08
Gh_D10G1355	36.7986	-1.67847	0.333134	-5.03843	4.69e-07	3.85e-06
Gh_A05G3671	11.9147	-1.67803	0.537534	-3.12172	0.00179798	0.00689686
Gh_A12G0127	316.351	-1.67802	0.242441	-6.92136	4.47e-12	7.12e-11
Gh_D03G0086	52.0808	-1.67761	0.396282	-4.23338	2.3e-05	0.000138897
Gh_A11G2020	1110.79	-1.67715	0.129961	-12.905	4.22e-38	3.82e-36
Gh_A10G2273	732.462	-1.67711	0.201101	-8.33965	7.45e-17	1.87e-15
Gh_D05G2112	62.1088	-1.67709	0.374456	-4.47874	7.51e-06	4.99e-05
Gh_D10G0416	26.0568	-1.67606	0.389961	-4.29802	1.72e-05	0.000106694
Gh_A12G2521	3772.28	-1.6757	0.324231	-5.16822	2.36e-07	2.02e-06
Gh_A01G0373	11.3337	-1.67541	0.507903	-3.29867	0.000971438	0.00401246
Gh_D10G1302	2342.23	-1.67467	0.095311	-17.5706	4.14e-69	1.11e-66
Gh_Sca115994G01	4.74489	-1.6741	0.536359	-3.12123	0.00180098	0.00690689
Gh_D09G0107	4497.97	-1.67335	0.130682	-12.8048	1.54e-37	1.37e-35
Gh_Sca016201G01	89.6001	-1.67308	0.288334	-5.80258	6.53e-09	7.1e-08
Gh_A08G1410	231.087	-1.67287	0.240316	-6.96114	3.38e-12	5.45e-11
Gh_A04G0976	237.963	-1.67259	0.296625	-5.63873	1.71e-08	1.76e-07
Gh_A12G0016	75.673	-1.6724	0.347182	-4.81707	1.46e-06	1.1e-05
Gh_A10G1530	17.7341	-1.67224	0.426163	-3.92394	8.71e-05	0.000462558
Gh_D10G0802	196.241	-1.67196	0.20489	-8.16027	3.34e-16	8e-15
Gh_D08G1710	1469.47	-1.6719	0.130323	-12.8289	1.13e-37	1.01e-35
Gh_D10G1386	1176.1	-1.67183	0.249648	-6.69673	2.13e-11	3.16e-10
Gh_D03G0813	333.991	-1.67173	0.169595	-9.85717	6.38e-23	2.53e-21
Gh_D05G2413	184.377	-1.6717	0.222323	-7.51923	5.51e-14	1.08e-12
Gh_A05G2282	1476.07	-1.67116	0.0958646	-17.4325	4.67e-68	1.22e-65
Gh_D11G1376	153.971	-1.66986	0.227414	-7.34284	2.09e-13	3.87e-12
Gh_D09G1061	524.194	-1.66819	0.169702	-9.83012	8.35e-23	3.27e-21
Gh_A08G1125	121.408	-1.66801	0.312103	-5.34443	9.07e-08	8.3e-07
Gh_A04G0235	5351.12	-1.66799	0.186067	-8.96448	3.12e-19	9.37e-18
Gh_D12G2666	1233.04	-1.66797	0.173176	-9.63164	5.88e-22	2.16e-20
Gh_D01G0027	118.431	-1.66775	0.281844	-5.91727	3.27e-09	3.72e-08
Gh_A13G0378	302.085	-1.66762	0.159502	-10.4552	1.39e-25	6.51e-24
Gh_A08G1581	2077.8	-1.66732	0.108886	-15.3125	6.31e-53	1.02e-50
Gh_D12G2202	276.351	-1.66699	0.173839	-9.58933	8.87e-22	3.23e-20
Gh_A03G0327	75.7062	-1.66681	0.281663	-5.91777	3.26e-09	3.71e-08
Gh_A02G1288	80.4619	-1.66608	0.302739	-5.50337	3.73e-08	3.63e-07
Gh_D06G0920	13320.3	-1.66606	0.17623	-9.45385	3.27e-21	1.15e-19
Gh_A13G0495	204.491	-1.66474	0.174413	-9.54479	1.36e-21	4.91e-20
Gh_A11G3117	64.2375	-1.66471	0.40371	-4.12353	3.73e-05	0.000214763
Gh_D01G1037	9.22529	-1.66407	0.528356	-3.14952	0.00163538	0.00634824
Gh_D04G1379	382.325	-1.664	0.185122	-8.98866	2.5e-19	7.57e-18
Gh_D10G2630	241.579	-1.66399	0.226263	-7.35423	1.92e-13	3.57e-12
Gh_D12G0701	140.524	-1.66378	0.269718	-6.16858	6.89e-10	8.52e-09
Gh_A12G0100	889.387	-1.66332	0.157307	-10.5737	3.95e-26	1.92e-24
Gh_D12G1244	179.216	-1.663	0.269878	-6.16204	7.18e-10	8.86e-09
Gh_D07G0080	7.22605	-1.66184	0.498095	-3.33639	0.00084875	0.00355533
Gh_D01G2083	6.65021	-1.66048	0.497562	-3.33723	0.000846184	0.00354662
Gh_A08G2058	1001.29	-1.65966	0.232606	-7.13506	9.67e-13	1.66e-11
Gh_D12G1663	25.7966	-1.65961	0.446649	-3.71568	0.000202658	0.000985595
Gh_D04G1218	37.5561	-1.65849	0.317567	-5.2225	1.77e-07	1.54e-06
Gh_D01G0446	12.6387	-1.65835	0.535954	-3.09421	0.00197339	0.00748252
Gh_A10G2343	12.3003	-1.65834	0.519811	-3.19027	0.00142142	0.005605
Gh_A07G2338	22.6887	-1.65777	0.431084	-3.8456	0.000120259	0.000615569
Gh_Sca060215G01	49.1134	-1.65759	0.336722	-4.92273	8.53e-07	6.69e-06
Gh_A10G1805	549.724	-1.65757	0.213101	-7.77833	7.35e-15	1.57e-13
Gh_D07G2254	194.497	-1.65694	0.233724	-7.0893	1.35e-12	2.28e-11
Gh_D10G0889	22.1656	-1.65665	0.439826	-3.7666	0.000165488	0.000821831
Gh_D11G1009	2272.61	-1.65659	0.229941	-7.20439	5.83e-13	1.03e-11
Gh_D10G1640	7958.62	-1.65643	0.101953	-16.247	2.35e-59	4.54e-57
Gh_D13G1684	8.50675	-1.65638	0.47256	-3.50513	0.00045639	0.00203551
Gh_A01G0502	382.789	-1.65607	0.148384	-11.1607	6.35e-29	3.59e-27
Gh_A10G1985	359.626	-1.65492	0.25661	-6.44916	1.12e-10	1.54e-09
Gh_D05G2470	4.43437	-1.65481	0.535111	-3.09247	0.001985	0.00751963
Gh_D07G1050	725.458	-1.65373	0.206871	-7.99405	1.31e-15	2.99e-14
Gh_D12G0988	11.964	-1.65346	0.484185	-3.41494	0.000637966	0.00274882
Gh_D02G2389	1488.56	-1.65341	0.201394	-8.20987	2.21e-16	5.39e-15
Gh_A12G0020	291.648	-1.65231	0.169751	-9.73372	2.17e-22	8.22e-21
Gh_A09G1675	36.4717	-1.65215	0.37738	-4.37794	1.2e-05	7.67e-05
Gh_D12G2015	1283.92	-1.65196	0.135478	-12.1936	3.36e-34	2.52e-32
Gh_A10G0816	4.86969	-1.65148	0.535606	-3.08338	0.00204661	0.00772592
Gh_D13G1452	2.25591	-1.65143	0.515931	-3.20088	0.00137008	0.0054327
Gh_D13G0160	3226.24	-1.65108	0.236114	-6.99273	2.7e-12	4.4e-11
Gh_A08G0356	22.6649	-1.65085	0.516889	-3.19383	0.00140401	0.00554949
Gh_A03G0524	452.104	-1.65044	0.370185	-4.4584	8.26e-06	5.45e-05
Gh_D07G0307	421.7	-1.64928	0.147496	-11.1819	5e-29	2.86e-27
Gh_A11G1245	12495.2	-1.64886	0.126068	-13.0791	4.34e-39	4.09e-37
Gh_A01G0547	23.4829	-1.64869	0.48803	-3.37826	0.000729451	0.0031031
Gh_D09G0700	170.513	-1.64824	0.312498	-5.27438	1.33e-07	1.19e-06
Gh_D07G2385	67.4069	-1.64785	0.366766	-4.49291	7.03e-06	4.7e-05
Gh_Sca075899G01	58.905	-1.6475	0.316935	-5.19824	2.01e-07	1.74e-06
Gh_D06G0184	941.665	-1.64686	0.2127	-7.74261	9.74e-15	2.05e-13
Gh_A05G0470	441.004	-1.64667	0.22483	-7.32408	2.41e-13	4.43e-12
Gh_D09G2309	1362.77	-1.64652	0.137425	-11.9812	4.46e-33	3.14e-31
Gh_Sca017163G01	165.332	-1.64626	0.381639	-4.31365	1.61e-05	0.000100045
Gh_D07G0301	1808.22	-1.64588	0.226845	-7.25551	4e-13	7.19e-12
Gh_D13G1979	5437.18	-1.64574	0.105743	-15.5635	1.29e-54	2.16e-52
Gh_D06G0761	205.037	-1.64538	0.184447	-8.92063	4.64e-19	1.37e-17
Gh_D01G0447	12.6137	-1.6452	0.535949	-3.0697	0.00214272	0.00804391
Gh_D05G2948	471.253	-1.6437	0.133725	-12.2916	1.01e-34	7.67e-33
Gh_D11G1748	131.709	-1.64368	0.200668	-8.19103	2.59e-16	6.26e-15
Gh_D05G1589	80.6181	-1.64363	0.397749	-4.13233	3.59e-05	0.000207642
Gh_D12G2219	319.727	-1.64355	0.280999	-5.84896	4.95e-09	5.47e-08
Gh_A08G1136	4.83335	-1.64349	0.535284	-3.07031	0.00213836	0.00803065
Gh_D05G1939	59.4897	-1.64305	0.46931	-3.50099	0.000463537	0.00206344
Gh_A11G2792	99.7352	-1.64288	0.257298	-6.38513	1.71e-10	2.29e-09
Gh_A05G0823	649.959	-1.64178	0.252126	-6.51174	7.43e-11	1.04e-09
Gh_D01G0031	2236.85	-1.64129	0.107737	-15.2343	2.1e-52	3.3e-50
Gh_D09G2403	7.19648	-1.6411	0.529458	-3.09959	0.00193788	0.00737178
Gh_D09G2075	4.89676	-1.64026	0.531456	-3.08636	0.00202625	0.00765698
Gh_D11G3352	186.115	-1.64026	0.256259	-6.40079	1.55e-10	2.08e-09
Gh_A09G1747	8.5368	-1.64012	0.5085	-3.22541	0.00125791	0.00503829
Gh_D13G1394	72.7762	-1.63911	0.333044	-4.9216	8.58e-07	6.73e-06
Gh_D03G0779	97.3448	-1.63889	0.391876	-4.18218	2.89e-05	0.000170609
Gh_A04G0629	4429.28	-1.63774	0.17268	-9.48425	2.44e-21	8.64e-20
Gh_A08G0725	45.4762	-1.63763	0.358812	-4.56404	5.02e-06	3.45e-05
Gh_A10G2152	161.244	-1.63746	0.249783	-6.55554	5.54e-11	7.84e-10
Gh_A03G1581	2517.88	-1.63727	0.109985	-14.8863	4.05e-50	5.93e-48
Gh_A08G2246	228.032	-1.63673	0.166278	-9.84334	7.32e-23	2.88e-21
Gh_A13G0280	1128.52	-1.63633	0.140022	-11.6862	1.5e-31	9.73e-30
Gh_D01G1566	68.4932	-1.63579	0.294816	-5.5485	2.88e-08	2.85e-07
Gh_D08G2141	51.2342	-1.63545	0.342554	-4.77428	1.8e-06	1.34e-05
Gh_D05G2210	19.4734	-1.63533	0.424299	-3.85419	0.000116111	0.000596225
Gh_D07G0197	18.6092	-1.63445	0.367569	-4.44664	8.72e-06	5.74e-05
Gh_A05G0797	12.2148	-1.63334	0.50698	-3.22171	0.00127429	0.00509517
Gh_A06G0712	48.0768	-1.63332	0.376008	-4.34385	1.4e-05	8.81e-05
Gh_A01G0433	6.42837	-1.63318	0.520653	-3.13679	0.0017081	0.00659583
Gh_D05G0760	148.556	-1.63281	0.2159	-7.56281	3.94e-14	7.81e-13
Gh_A01G1839	2011.52	-1.6326	0.501173	-3.25757	0.00112372	0.0045645
Gh_A01G0775	43340.6	-1.63244	0.163777	-9.96747	2.12e-23	8.7e-22
Gh_A03G1705	39824.2	-1.63158	0.170297	-9.58078	9.63e-22	3.5e-20
Gh_A01G2000	43.9999	-1.63143	0.462583	-3.52679	0.000420627	0.00189398
Gh_D11G2922	8.59698	-1.6313	0.510774	-3.19378	0.00140423	0.00554998
Gh_D02G0694	239.658	-1.63056	0.181342	-8.99163	2.44e-19	7.38e-18
Gh_Sca069039G01	472.749	-1.62983	0.365416	-4.4602	8.19e-06	5.41e-05
Gh_D12G0135	108.748	-1.62963	0.350122	-4.65447	3.25e-06	2.31e-05
Gh_D05G1992	10.524	-1.6295	0.526897	-3.09263	0.00198393	0.00751656
Gh_A09G0832	408.675	-1.62944	0.127282	-12.8019	1.6e-37	1.42e-35
Gh_A03G1130	225.8	-1.62888	0.170564	-9.54993	1.3e-21	4.68e-20
Gh_D12G1415	333.84	-1.62711	0.319216	-5.09721	3.45e-07	2.89e-06
Gh_D02G1805	385.637	-1.62692	0.246573	-6.59814	4.16e-11	5.96e-10
Gh_D13G1456	174.629	-1.62691	0.211174	-7.70415	1.32e-14	2.74e-13
Gh_A11G2761	12.711	-1.62653	0.473672	-3.43387	0.000595038	0.00258324
Gh_D03G0437	563.532	-1.62596	0.231505	-7.02341	2.17e-12	3.58e-11
Gh_A11G2882	72.5695	-1.62575	0.471639	-3.44703	0.000566794	0.00247268
Gh_D05G3882	528.639	-1.62571	0.251856	-6.45492	1.08e-10	1.48e-09
Gh_D09G1833	381.716	-1.62564	0.177362	-9.16564	4.93e-20	1.58e-18
Gh_A04G0385	896.754	-1.62528	0.129111	-12.5882	2.45e-36	2.02e-34
Gh_D12G2297	69.1983	-1.6242	0.320239	-5.07184	3.94e-07	3.27e-06
Gh_A05G1878	64.4909	-1.62378	0.260512	-6.23303	4.57e-10	5.78e-09
Gh_A06G1529	529.164	-1.62313	0.288618	-5.62381	1.87e-08	1.91e-07
Gh_D05G2541	41.3489	-1.62309	0.328678	-4.93822	7.88e-07	6.23e-06
Gh_A07G0297	921.564	-1.62295	0.156332	-10.3815	3.01e-25	1.39e-23
Gh_A12G1863	193.518	-1.62241	0.448759	-3.61533	0.000299966	0.00140054
Gh_A07G2022	203.638	-1.62241	0.268663	-6.03882	1.55e-09	1.83e-08
Gh_A03G1284	395.515	-1.62214	0.248661	-6.5235	6.87e-11	9.61e-10
Gh_A08G0632	461.618	-1.6218	0.134688	-12.0411	2.16e-33	1.55e-31
Gh_D05G1685	770.186	-1.621	0.162381	-9.98268	1.82e-23	7.48e-22
Gh_D12G2324	1121.4	-1.62097	0.121521	-13.3391	1.37e-40	1.37e-38
Gh_D11G1214	5.41583	-1.62042	0.530431	-3.05491	0.00225129	0.00840389
Gh_A04G1167	98.0503	-1.62018	0.260814	-6.21202	5.23e-10	6.56e-09
Gh_D12G2006	68.3379	-1.61906	0.311376	-5.1997	2e-07	1.73e-06
Gh_A10G1636	38.5908	-1.61887	0.392832	-4.12101	3.77e-05	0.000216929
Gh_A13G1958	412.012	-1.61871	0.103912	-15.5776	1.03e-54	1.75e-52
Gh_D11G1726	101.907	-1.61761	0.268055	-6.03461	1.59e-09	1.88e-08
Gh_D07G0431	37.3822	-1.61739	0.318131	-5.08404	3.69e-07	3.08e-06
Gh_Sca090787G01	1156.89	-1.61681	0.354477	-4.56111	5.09e-06	3.49e-05
Gh_A13G0138	1830.79	-1.61672	0.245256	-6.59197	4.34e-11	6.2e-10
Gh_D05G3235	184.885	-1.61665	0.277921	-5.81693	5.99e-09	6.55e-08
Gh_Sca070808G01	8.17874	-1.61634	0.522376	-3.09421	0.00197341	0.00748252
Gh_D01G1508	45758.7	-1.61628	0.162213	-9.96393	2.19e-23	9e-22
Gh_D08G1704	574.76	-1.61549	0.234321	-6.89434	5.41e-12	8.52e-11
Gh_D08G1880	2.26935	-1.61547	0.5269	-3.06599	0.00216948	0.008136
Gh_A05G1547	2211.05	-1.61517	0.168196	-9.60295	7.77e-22	2.84e-20
Gh_D01G0559	68.39	-1.61451	0.439922	-3.66999	0.000242556	0.00115752
Gh_D13G2430	4.59799	-1.61386	0.48853	-3.30351	0.000954826	0.00395057
Gh_D04G1661	210.596	-1.6135	0.342226	-4.71471	2.42e-06	1.76e-05
Gh_D13G2210	102.104	-1.61309	0.232361	-6.94218	3.86e-12	6.19e-11
Gh_A12G0584	222.847	-1.61214	0.503727	-3.20042	0.00137226	0.0054395
Gh_A10G2347	82.0485	-1.61172	0.303548	-5.3096	1.1e-07	9.91e-07
Gh_A09G2335	980.772	-1.61154	0.205671	-7.83553	4.67e-15	1.01e-13
Gh_D10G0192	83.705	-1.61126	0.255695	-6.3015	2.95e-10	3.82e-09
Gh_A10G2294	1486.9	-1.6112	0.176416	-9.13295	6.67e-20	2.12e-18
Gh_D13G1562	529.402	-1.6107	0.16959	-9.49761	2.15e-21	7.64e-20
Gh_D13G2458	4497.32	-1.61	0.237817	-6.76989	1.29e-11	1.96e-10
Gh_A08G2015	62.6602	-1.6096	0.522608	-3.07993	0.00207049	0.00780493
Gh_A01G0389	31.4014	-1.60939	0.467081	-3.44564	0.000569715	0.00248345
Gh_D10G2111	2167.56	-1.60849	0.0818119	-19.6608	4.67e-86	2.2e-83
Gh_D06G2065	171.056	-1.60837	0.241382	-6.66317	2.68e-11	3.92e-10
Gh_A08G1791	808.413	-1.60816	0.204509	-7.86355	3.73e-15	8.17e-14
Gh_A05G2062	113.098	-1.60811	0.294781	-5.45529	4.89e-08	4.68e-07
Gh_A09G0578	1058.16	-1.60802	0.19407	-8.28576	1.17e-16	2.91e-15
Gh_A05G1626	1770.31	-1.60784	0.148336	-10.8392	2.25e-27	1.17e-25
Gh_D12G0477	452.552	-1.6077	0.120859	-13.3023	2.25e-40	2.21e-38
Gh_D10G2457	6189.17	-1.60748	0.158005	-10.1736	2.6e-24	1.14e-22
Gh_A12G1368	30.1321	-1.60684	0.372373	-4.31514	1.59e-05	9.95e-05
Gh_D06G0003	228.905	-1.60574	0.181259	-8.85881	8.09e-19	2.34e-17
Gh_A09G2418	2048.95	-1.6049	0.397539	-4.0371	5.41e-05	0.000301463
Gh_D06G1403	940.662	-1.60382	0.216919	-7.39367	1.43e-13	2.68e-12
Gh_A05G3078	2.77475	-1.60331	0.515778	-3.10853	0.00188018	0.00717757
Gh_D02G0760	24.1783	-1.60205	0.435072	-3.68227	0.000231168	0.00110953
Gh_A01G0080	6.43222	-1.60179	0.508069	-3.1527	0.00161769	0.00629004
Gh_D12G0953	35.1649	-1.60172	0.376538	-4.25379	2.1e-05	0.000127846
Gh_D04G1266	5888.04	-1.60164	0.163226	-9.81243	9.95e-23	3.89e-21
Gh_A11G0080	2446.78	-1.6006	0.382516	-4.18439	2.86e-05	0.000169126
Gh_D07G0374	79.0619	-1.59982	0.288876	-5.53807	3.06e-08	3.02e-07
Gh_A11G0382	316.781	-1.59952	0.145462	-10.9961	3.99e-28	2.18e-26
Gh_D08G0004	2.43525	-1.59924	0.484244	-3.30254	0.000958127	0.00396226
Gh_D05G0654	822.505	-1.59882	0.142388	-11.2287	2.95e-29	1.71e-27
Gh_A06G1723	316.225	-1.59803	0.222453	-7.18368	6.79e-13	1.19e-11
Gh_D10G0915	11.1295	-1.59762	0.500509	-3.192	0.00141294	0.00557533
Gh_D02G1208	2391.58	-1.59754	0.175853	-9.08452	1.04e-19	3.25e-18
Gh_D05G3348	1807.43	-1.59737	0.255248	-6.2581	3.9e-10	4.97e-09
Gh_D11G1050	14.1846	-1.597	0.494833	-3.22735	0.00124942	0.00501084
Gh_A11G0810	109.855	-1.59676	0.18024	-8.8591	8.07e-19	2.34e-17
Gh_A09G1356	61.1753	-1.59675	0.363437	-4.39345	1.12e-05	7.18e-05
Gh_D08G1701	296.29	-1.5963	0.364929	-4.37427	1.22e-05	7.79e-05
Gh_A09G0690	388.883	-1.59624	0.151535	-10.5338	6.04e-26	2.9e-24
Gh_A11G1708	41.4573	-1.59608	0.327258	-4.87715	1.08e-06	8.28e-06
Gh_D02G0364	1076.05	-1.59591	0.138364	-11.5341	8.88e-31	5.62e-29
Gh_D09G2294	1383.87	-1.59557	0.237176	-6.72736	1.73e-11	2.58e-10
Gh_D05G1264	221.609	-1.59543	0.274778	-5.80625	6.39e-09	6.95e-08
Gh_A08G2473	220.457	-1.59451	0.309476	-5.1523	2.57e-07	2.19e-06
Gh_D06G0222	145.929	-1.59426	0.249019	-6.40217	1.53e-10	2.06e-09
Gh_A08G1222	24.0688	-1.59414	0.408017	-3.90704	9.34e-05	0.000492311
Gh_A05G0520	209.037	-1.59399	0.19728	-8.07985	6.48e-16	1.52e-14
Gh_D12G0394	284.437	-1.59349	0.167423	-9.51771	1.77e-21	6.34e-20
Gh_D13G1806	268.86	-1.59303	0.336633	-4.73224	2.22e-06	1.63e-05
Gh_D05G0800	29.7131	-1.59241	0.373548	-4.26294	2.02e-05	0.000123159
Gh_D06G2303	87.8864	-1.59194	0.323137	-4.92653	8.37e-07	6.58e-06
Gh_D09G1456	114.197	-1.59171	0.489922	-3.2489	0.00115852	0.00468983
Gh_A11G1499	233.14	-1.5915	0.168854	-9.42531	4.29e-21	1.49e-19
Gh_D02G2018	1102.27	-1.59148	0.176481	-9.01785	1.92e-19	5.86e-18
Gh_A05G2531	309.899	-1.59144	0.421935	-3.77176	0.000162101	0.000806382
Gh_Sca007158G02	425.673	-1.5903	0.408378	-3.89419	9.85e-05	0.000516015
Gh_D07G0910	42.137	-1.58932	0.483128	-3.28965	0.00100314	0.00412877
Gh_A13G1262	13.0233	-1.58917	0.504622	-3.14923	0.00163702	0.00635377
Gh_A07G0667	305.337	-1.58889	0.488284	-3.25403	0.00113779	0.00461391
Gh_A11G1811	22.8741	-1.58885	0.462649	-3.43423	0.000594233	0.00258003
Gh_A04G1402	4033.6	-1.58772	0.144376	-10.9971	3.95e-28	2.15e-26
Gh_D05G2226	27.8611	-1.5876	0.476477	-3.33195	0.000862393	0.00360471
Gh_Sca015724G01	20.1911	-1.58708	0.442038	-3.59036	0.000330217	0.00152638
Gh_D05G1100	109.98	-1.587	0.491428	-3.22936	0.00124066	0.00498155
Gh_D01G1965	238.52	-1.58691	0.405475	-3.9137	9.09e-05	0.000480142
Gh_D10G1770	1003.23	-1.5866	0.118293	-13.4124	5.11e-41	5.26e-39
Gh_D10G0167	31200.9	-1.5864	0.140254	-11.3109	1.16e-29	6.88e-28
Gh_A05G0879	336.728	-1.58625	0.158868	-9.98468	1.78e-23	7.34e-22
Gh_A02G1620	188.543	-1.58566	0.210694	-7.5259	5.24e-14	1.03e-12
Gh_D10G1173	5.12766	-1.58537	0.537594	-2.94902	0.00318785	0.0113867
Gh_D07G0745	200.689	-1.58521	0.487539	-3.25144	0.0011482	0.00465193
Gh_D10G2243	1193.66	-1.58443	0.138367	-11.451	2.32e-30	1.44e-28
Gh_D01G0800	35482.2	-1.58359	0.177593	-8.917	4.79e-19	1.41e-17
Gh_A07G0269	589.623	-1.58317	0.212804	-7.43959	1.01e-13	1.93e-12
Gh_A03G0853	143.171	-1.58289	0.253463	-6.24505	4.24e-10	5.38e-09
Gh_A09G1040	208.748	-1.58279	0.265497	-5.96162	2.5e-09	2.88e-08
Gh_D02G2127	10330.9	-1.58256	0.16243	-9.74301	1.98e-22	7.53e-21
Gh_D04G1778	48.8963	-1.58246	0.291606	-5.42669	5.74e-08	5.45e-07
Gh_A08G2558	731.509	-1.58241	0.226661	-6.9814	2.92e-12	4.75e-11
Gh_A13G2254	11.0465	-1.58195	0.487511	-3.24495	0.00117471	0.00474844
Gh_D04G1269	5562	-1.58137	0.144395	-10.9517	6.52e-28	3.52e-26
Gh_D09G1659	80.828	-1.58127	0.388653	-4.06858	4.73e-05	0.00026665
Gh_D02G1256	9.33959	-1.58124	0.503633	-3.13966	0.00169143	0.00653836
Gh_A10G1848	250.02	-1.58102	0.167461	-9.44111	3.69e-21	1.29e-19
Gh_A11G0828	321.363	-1.5808	0.159706	-9.89816	4.24e-23	1.7e-21
Gh_D12G1733	55.1531	-1.5788	0.361957	-4.36185	1.29e-05	8.2e-05
Gh_D09G0362	1487.36	-1.57875	0.0922804	-17.1082	1.29e-65	2.97e-63
Gh_A12G0899	9.28108	-1.57857	0.4932	-3.20067	0.00137109	0.00543625
Gh_D01G1098	44.5789	-1.57813	0.301151	-5.24033	1.6e-07	1.41e-06
Gh_A08G0681	88.7281	-1.57801	0.272669	-5.78726	7.15e-09	7.73e-08
Gh_Sca091086G01	12.9301	-1.57792	0.507244	-3.11077	0.00186603	0.00713009
Gh_A11G1420	178.987	-1.57779	0.275593	-5.72506	1.03e-08	1.09e-07
Gh_A04G0366	8.15047	-1.57734	0.536861	-2.93808	0.00330249	0.0117429
Gh_A03G0099	124.33	-1.57668	0.241421	-6.53083	6.54e-11	9.18e-10
Gh_A09G0319	13.3828	-1.57646	0.473324	-3.33062	0.000866516	0.00361884
Gh_A09G1946	42.8237	-1.57609	0.382295	-4.12271	3.74e-05	0.000215462
Gh_A13G0187	262.906	-1.57569	0.343545	-4.58656	4.51e-06	3.12e-05
Gh_A03G1706	6819.64	-1.57551	0.156126	-10.0912	6.04e-24	2.58e-22
Gh_A08G1493	207.618	-1.57492	0.168768	-9.33182	1.04e-20	3.49e-19
Gh_Sca005199G02	47.5948	-1.57487	0.38928	-4.0456	5.22e-05	0.000291543
Gh_D01G1003	705.222	-1.57452	0.137822	-11.4243	3.16e-30	1.93e-28
Gh_D07G1399	81.5186	-1.57404	0.284768	-5.52743	3.25e-08	3.19e-07
Gh_D05G1353	18.7031	-1.57318	0.452791	-3.47441	0.000511987	0.00225484
Gh_A08G1350	146.698	-1.57301	0.405261	-3.88147	0.000103829	0.000540582
Gh_D10G1891	19.34	-1.57279	0.493944	-3.18414	0.00145187	0.00571542
Gh_D07G0530	4.01447	-1.57253	0.534802	-2.9404	0.00327794	0.0116699
Gh_A04G0305	1056.2	-1.57198	0.224961	-6.98782	2.79e-12	4.54e-11
Gh_D09G1741	84.3958	-1.57189	0.319387	-4.92159	8.58e-07	6.73e-06
Gh_A03G2151	1007.42	-1.57187	0.118035	-13.317	1.84e-40	1.83e-38
Gh_D05G3199	2628.37	-1.57153	0.106652	-14.7351	3.83e-49	5.45e-47
Gh_D13G0919	378.468	-1.57079	0.193172	-8.13156	4.24e-16	1.01e-14
Gh_D12G2135	417.279	-1.57045	0.259231	-6.05812	1.38e-09	1.64e-08
Gh_D11G2897	2.90116	-1.57002	0.52716	-2.97827	0.00289883	0.0104808
Gh_D01G1549	57.3971	-1.56976	0.308965	-5.08072	3.76e-07	3.13e-06
Gh_A13G0203	572.765	-1.56972	0.120584	-13.0176	9.72e-39	9.09e-37
Gh_A03G1759	1594.71	-1.56933	0.134198	-11.6941	1.37e-31	8.89e-30
Gh_A11G0921	7.4709	-1.56852	0.508726	-3.08324	0.00204763	0.00772924
Gh_A05G0637	126.154	-1.56776	0.417268	-3.7572	0.000171828	0.000849842
Gh_A09G2094	1852.05	-1.56723	0.206286	-7.59738	3.02e-14	6.05e-13
Gh_A03G1709	502.582	-1.56701	0.168124	-9.32061	1.16e-20	3.86e-19
Gh_A05G2724	362.987	-1.56678	0.385672	-4.06246	4.86e-05	0.000273057
Gh_A05G1663	24.9613	-1.56622	0.394724	-3.9679	7.25e-05	0.000392418
Gh_D05G0332	9612.04	-1.56604	0.18585	-8.42638	3.57e-17	9.14e-16
Gh_A03G2165	572.584	-1.56581	0.110586	-14.1591	1.64e-45	2.01e-43
Gh_D06G1142	2296.32	-1.56557	0.140832	-11.1166	1.04e-28	5.86e-27
Gh_D09G0055	3347.38	-1.56545	0.112718	-13.8882	7.46e-44	8.58e-42
Gh_A08G1987	679.843	-1.5652	0.198207	-7.89676	2.86e-15	6.33e-14
Gh_A10G1483	789.426	-1.56147	0.215126	-7.25839	3.92e-13	7.04e-12
Gh_D12G1501	284.506	-1.56091	0.239672	-6.51269	7.38e-11	1.03e-09
Gh_D13G0299	1244.64	-1.56072	0.169298	-9.21876	3.01e-20	9.79e-19
Gh_D08G2485	384.215	-1.56038	0.135368	-11.5269	9.65e-31	6.1e-29
Gh_A02G1470	245.53	-1.56026	0.254612	-6.12798	8.9e-10	1.08e-08
Gh_A09G1503	761.92	-1.55866	0.19529	-7.98126	1.45e-15	3.29e-14
Gh_D01G0163	3113.22	-1.55836	0.150912	-10.3263	5.36e-25	2.45e-23
Gh_D12G2184	33.2626	-1.55793	0.381096	-4.08802	4.35e-05	0.000247288
Gh_A06G1694	133.671	-1.55783	0.257242	-6.05588	1.4e-09	1.66e-08
Gh_A11G2981	7.89231	-1.55698	0.515975	-3.01755	0.00254824	0.00936308
Gh_D07G1307	110.713	-1.55627	0.414102	-3.75817	0.000171158	0.000847174
Gh_D05G2171	33.3661	-1.55607	0.332596	-4.67855	2.89e-06	2.07e-05
Gh_Sca006530G02	661.116	-1.55588	0.112471	-13.8337	1.6e-43	1.8e-41
Gh_A11G0366	482.337	-1.55555	0.380716	-4.08585	4.39e-05	0.000249476
Gh_A05G3741	19.356	-1.55496	0.400487	-3.88266	0.00010332	0.000538185
Gh_A01G0811	70.4095	-1.55466	0.282428	-5.50464	3.7e-08	3.61e-07
Gh_A06G0966	3196.84	-1.55466	0.138031	-11.2631	2e-29	1.17e-27
Gh_D09G2258	639.599	-1.55422	0.222193	-6.99493	2.65e-12	4.33e-11
Gh_D04G1924	2438.06	-1.55302	0.197987	-7.84401	4.36e-15	9.49e-14
Gh_A08G0287	195.43	-1.5518	0.219177	-7.08012	1.44e-12	2.43e-11
Gh_A02G1698	22207.1	-1.55141	0.176514	-8.78916	1.51e-18	4.27e-17
Gh_D12G1232	238.036	-1.5514	0.501025	-3.09645	0.0019585	0.00743567
Gh_A01G0099	25.5152	-1.5514	0.335214	-4.62809	3.69e-06	2.6e-05
Gh_A05G2473	473.421	-1.55093	0.138896	-11.1661	5.97e-29	3.39e-27
Gh_A08G0024	62.5737	-1.55066	0.352795	-4.39536	1.11e-05	7.13e-05
Gh_D09G1370	12.6166	-1.55007	0.459941	-3.37015	0.000751284	0.00318574
Gh_A02G0036	147.162	-1.54957	0.236944	-6.53982	6.16e-11	8.67e-10
Gh_A05G3018	230.55	-1.5493	0.208247	-7.43971	1.01e-13	1.93e-12
Gh_D08G0951	5.32932	-1.54851	0.535616	-2.89108	0.00383923	0.0133957
Gh_D08G1604	89.4627	-1.54843	0.386127	-4.01016	6.07e-05	0.000334156
Gh_D09G1360	413.282	-1.54774	0.191856	-8.06718	7.19e-16	1.67e-14
Gh_A01G1349	40978.1	-1.54727	0.135677	-11.404	3.99e-30	2.43e-28
Gh_D13G1892	733.819	-1.54697	0.178977	-8.64341	5.46e-18	1.48e-16
Gh_A09G1730	2.259	-1.54637	0.449946	-3.4368	0.000588627	0.0025574
Gh_A11G0453	6.50704	-1.54563	0.538509	-2.87021	0.00410199	0.0141886
Gh_Sca084424G01	71.929	-1.54508	0.36364	-4.24891	2.15e-05	0.000130419
Gh_A05G0431	115.191	-1.54436	0.228989	-6.74425	1.54e-11	2.31e-10
Gh_A09G0718	125.384	-1.54426	0.247594	-6.23705	4.46e-10	5.65e-09
Gh_A05G0855	563.022	-1.54398	0.220196	-7.01182	2.35e-12	3.87e-11
Gh_D07G1084	67.8904	-1.54337	0.295113	-5.22975	1.7e-07	1.49e-06
Gh_A13G2057	5425.76	-1.54328	0.325592	-4.73991	2.14e-06	1.57e-05
Gh_D12G1252	145.17	-1.54321	0.199807	-7.72354	1.13e-14	2.37e-13
Gh_A13G2334	1145.52	-1.54308	0.123341	-12.5107	6.52e-36	5.3e-34
Gh_D13G0451	304.575	-1.54302	0.277657	-5.5573	2.74e-08	2.72e-07
Gh_D05G0594	316.734	-1.54245	0.34865	-4.42407	9.69e-06	6.31e-05
Gh_D11G1154	452.81	-1.54176	0.163606	-9.42362	4.36e-21	1.51e-19
Gh_A03G0791	1150.24	-1.54134	0.20358	-7.57114	3.7e-14	7.35e-13
Gh_D02G0405	356.49	-1.54087	0.222392	-6.92865	4.25e-12	6.78e-11
Gh_A06G0209	21.6916	-1.54083	0.351413	-4.38466	1.16e-05	7.45e-05
Gh_A11G2734	1588.18	-1.53997	0.259589	-5.93234	2.99e-09	3.41e-08
Gh_Sca023511G01	1583.09	-1.53992	0.258129	-5.9657	2.44e-09	2.81e-08
Gh_D11G2411	751.877	-1.53949	0.378437	-4.06802	4.74e-05	0.000267198
Gh_D05G1407	20.5926	-1.53938	0.450302	-3.41855	0.000629567	0.00271805
Gh_A03G1994	2.83125	-1.5393	0.532996	-2.88801	0.00387692	0.013511
Gh_A05G1941	1108.52	-1.53916	0.157543	-9.76977	1.52e-22	5.84e-21
Gh_A02G0767	35.7325	-1.53871	0.301169	-5.10913	3.24e-07	2.72e-06
Gh_D05G0313	2890.16	-1.53807	0.117728	-13.0647	5.24e-39	4.92e-37
Gh_A12G0793	187.631	-1.53805	0.294874	-5.21596	1.83e-07	1.6e-06
Gh_A11G2814	5325.95	-1.53802	0.127316	-12.0803	1.34e-33	9.7e-32
Gh_D12G1495	15980.6	-1.53746	0.197203	-7.79633	6.37e-15	1.36e-13
Gh_D12G0070	7.11224	-1.53655	0.537586	-2.85824	0.00426001	0.0146543
Gh_Sca005105G01	12.9623	-1.53655	0.495209	-3.10282	0.00191683	0.0072984
Gh_A05G0655	70.013	-1.53632	0.292263	-5.25664	1.47e-07	1.3e-06
Gh_D11G2414	314.173	-1.5363	0.334567	-4.59191	4.39e-06	3.05e-05
Gh_D05G2640	615.719	-1.53509	0.142929	-10.7402	6.59e-27	3.35e-25
Gh_D11G0156	128.479	-1.53411	0.257851	-5.94959	2.69e-09	3.08e-08
Gh_D04G0109	395.914	-1.5341	0.163756	-9.36818	7.38e-21	2.52e-19
Gh_D10G0428	190.358	-1.53376	0.33752	-4.54422	5.51e-06	3.76e-05
Gh_A09G0420	159.003	-1.53363	0.256671	-5.97507	2.3e-09	2.66e-08
Gh_D10G1555	27.1168	-1.53358	0.394995	-3.88253	0.000103373	0.000538356
Gh_A07G0021	6.31754	-1.53305	0.522959	-2.93149	0.00337342	0.0119645
Gh_A07G2091	130.588	-1.53218	0.190546	-8.04097	8.91e-16	2.06e-14
Gh_D03G0159	1495.1	-1.53196	0.151778	-10.0935	5.91e-24	2.52e-22
Gh_D09G1252	436.059	-1.53191	0.123285	-12.4257	1.89e-35	1.51e-33
Gh_A02G0844	13.0204	-1.53138	0.465672	-3.28854	0.00100708	0.00414354
Gh_D08G0611	12.7825	-1.53123	0.484321	-3.1616	0.00156903	0.00612946
Gh_A06G1037	2537.84	-1.53097	0.114529	-13.3675	9.36e-41	9.47e-39
Gh_D13G2518	244.046	-1.5309	0.216738	-7.06335	1.63e-12	2.73e-11
Gh_A11G3182	16.7365	-1.53058	0.468994	-3.26354	0.00110031	0.00448521
Gh_A05G1573	1140.21	-1.53033	0.116823	-13.0995	3.31e-39	3.13e-37
Gh_A03G0546	408.941	-1.52993	0.145191	-10.5374	5.81e-26	2.79e-24
Gh_A08G1555	68.8563	-1.5299	0.395484	-3.86843	0.000109539	0.000566343
Gh_D07G0076	145.407	-1.52989	0.20097	-7.61251	2.69e-14	5.42e-13
Gh_A06G1187	415.655	-1.52974	0.166465	-9.18956	3.94e-20	1.27e-18
Gh_A01G1867	35.3934	-1.52961	0.345462	-4.42772	9.52e-06	6.22e-05
Gh_D06G0208	26.6695	-1.52897	0.423355	-3.61156	0.000304359	0.00141799
Gh_A11G2465	21.3875	-1.52841	0.420535	-3.63445	0.000278578	0.0013098
Gh_D11G0430	783.085	-1.52818	0.110007	-13.8916	7.12e-44	8.21e-42
Gh_D12G2747	406.561	-1.52785	0.144251	-10.5916	3.26e-26	1.59e-24
Gh_A08G0963	59.6116	-1.52765	0.488823	-3.12515	0.00177712	0.00682503
Gh_D04G0732	8.91547	-1.52721	0.514177	-2.9702	0.00297601	0.010724
Gh_D06G0886	6.32994	-1.52683	0.537877	-2.83863	0.00453082	0.0154654
Gh_A10G1489	654.736	-1.52603	0.154411	-9.88292	4.94e-23	1.96e-21
Gh_A08G1406	282.651	-1.52602	0.350649	-4.352	1.35e-05	8.53e-05
Gh_D10G2067	14.5575	-1.52593	0.430413	-3.54528	0.000392197	0.00178151
Gh_D12G2133	43.7795	-1.5258	0.392737	-3.88505	0.00010231	0.000533678
Gh_Sca065499G01	24.9147	-1.52579	0.39601	-3.8529	0.000116729	0.000599117
Gh_A05G3146	1070.51	-1.52522	0.167604	-9.10012	9.02e-20	2.83e-18
Gh_A08G1265	7.21322	-1.52517	0.50438	-3.02386	0.0024957	0.00919786
Gh_A05G0068	196.403	-1.52512	0.203923	-7.4789	7.49e-14	1.45e-12
Gh_A06G1272	36.4152	-1.52459	0.523904	-2.91005	0.00361369	0.012703
Gh_Sca005136G01	13.4513	-1.52449	0.420163	-3.62834	0.000285249	0.00133901
Gh_A05G2714	128.055	-1.52447	0.239625	-6.36189	1.99e-10	2.64e-09
Gh_A09G1491	821.277	-1.52422	0.193912	-7.86037	3.83e-15	8.37e-14
Gh_D02G0244	87.615	-1.52401	0.281465	-5.41455	6.14e-08	5.8e-07
Gh_D01G2080	2065.43	-1.52359	0.511751	-2.97721	0.00290883	0.0105105
Gh_A11G0057	17.1798	-1.52253	0.44943	-3.38769	0.000704844	0.00301028
Gh_D11G2008	804.878	-1.52186	0.152821	-9.95848	2.32e-23	9.47e-22
Gh_D05G0334	167.802	-1.52139	0.178703	-8.51355	1.69e-17	4.44e-16
Gh_D05G2386	507.634	-1.52132	0.0977419	-15.5647	1.26e-54	2.13e-52
Gh_A03G1584	96.9877	-1.52095	0.261374	-5.81906	5.92e-09	6.48e-08
Gh_D10G1878	139.946	-1.51975	0.226338	-6.71453	1.89e-11	2.81e-10
Gh_D05G0639	312.859	-1.51961	0.141493	-10.7398	6.62e-27	3.36e-25
Gh_A09G0195	75.5797	-1.51938	0.319938	-4.74899	2.04e-06	1.51e-05
Gh_A06G1083	786.196	-1.51867	0.169375	-8.96632	3.07e-19	9.22e-18
Gh_A07G0697	2649.45	-1.51811	0.257502	-5.89553	3.73e-09	4.2e-08
Gh_D01G0551	312.085	-1.51809	0.405082	-3.7476	0.000178532	0.000878745
Gh_A13G0359	20.9042	-1.51793	0.468666	-3.23882	0.00120024	0.00483957
Gh_D07G1802	988.924	-1.51681	0.133926	-11.3257	9.78e-30	5.81e-28
Gh_D10G1938	19.6051	-1.51667	0.529624	-2.86367	0.00418765	0.0144411
Gh_A05G2762	972.152	-1.51605	0.243736	-6.22007	4.97e-10	6.25e-09
Gh_A13G0153	517.964	-1.51545	0.276952	-5.47187	4.45e-08	4.29e-07
Gh_D03G0810	106.612	-1.51504	0.348175	-4.35136	1.35e-05	8.55e-05
Gh_A08G1579	1191.18	-1.51479	0.168724	-8.97792	2.76e-19	8.32e-18
Gh_D07G1409	1521.16	-1.5145	0.253751	-5.96846	2.39e-09	2.77e-08
Gh_A10G1515	403.263	-1.51425	0.147508	-10.2655	1.01e-24	4.52e-23
Gh_D01G0170	10.3382	-1.51422	0.456149	-3.31958	0.00090154	0.00374872
Gh_D12G0630	13.5597	-1.51419	0.487968	-3.10306	0.00191533	0.00729458
Gh_A12G1621	3526.33	-1.51409	0.131141	-11.5455	7.78e-31	4.96e-29
Gh_A02G0161	3.10265	-1.51396	0.533776	-2.83632	0.00456363	0.0155619
Gh_D08G1291	26.5529	-1.51395	0.520405	-2.90918	0.00362379	0.0127316
Gh_D12G1906	78.6661	-1.51375	0.254086	-5.95763	2.56e-09	2.94e-08
Gh_D02G0857	2966.4	-1.513	0.300664	-5.03218	4.85e-07	3.97e-06
Gh_A06G1691	3.97788	-1.51299	0.536549	-2.81985	0.0048046	0.016243
Gh_D04G0414	122.863	-1.51251	0.263848	-5.73253	9.89e-09	1.05e-07
Gh_Sca013597G01	141.776	-1.51251	0.317174	-4.76869	1.85e-06	1.38e-05
[truncated: 5,748 more rows]

## Sheet: 240min
	baseMean	log2FoldChange	lfcSE	stat	pvalue	padj
Gh_A12G2714	270.675	-2.28811	0.478244	-4.78439	1.72e-06	0.000373285
Gh_D05G3279	45.6744	-2.24611	0.538412	-4.17172	3.02e-05	0.00285805
Gh_D09G1582	817.373	-2.16013	0.485788	-4.44664	8.72e-06	0.00123311
Gh_D13G1407	99.8033	-2.14985	0.538755	-3.99041	6.6e-05	0.00490547
Gh_D12G2669	110.729	-2.13481	0.490454	-4.35272	1.34e-05	0.00165165
Gh_A02G0260	64.0031	-2.10518	0.501369	-4.19886	2.68e-05	0.00262499
Gh_D06G2277	180.643	-2.09992	0.476185	-4.40988	1.03e-05	0.00138907
Gh_D13G2158	43.7277	-2.04829	0.527584	-3.88239	0.000103434	0.00662441
Gh_A07G0078	33.5928	-2.0299	0.497747	-4.07816	4.54e-05	0.00371032
Gh_A12G1267	43.8774	-2.01662	0.343229	-5.87543	4.22e-09	4.28e-06
Gh_A01G1367	1161	-1.97008	0.524835	-3.7537	0.000174242	0.00929508
Gh_D13G1816	41.5198	-1.93567	0.502539	-3.85178	0.000117262	0.00711564
Gh_Sca038163G01	60.4718	-1.93374	0.399759	-4.83727	1.32e-06	0.000311455
Gh_A06G1585	440.992	-1.92198	0.428245	-4.48804	7.19e-06	0.00107975
Gh_D05G1893	39.9809	-1.90953	0.510998	-3.73687	0.000186326	0.00970169
Gh_A07G0146	34.909	-1.89777	0.41639	-4.55769	5.17e-06	0.000828685
Gh_Sca010391G01	89.4218	-1.89043	0.534224	-3.53864	0.000402197	0.0154856
Gh_D01G0520	226.19	-1.87023	0.519109	-3.60278	0.000314836	0.0133118
Gh_A05G2113	526.562	-1.86713	0.455124	-4.10247	4.09e-05	0.00348244
Gh_D12G2247	34.6086	-1.84891	0.493851	-3.74387	0.000181206	0.0095355
Gh_D05G2356	79.162	-1.84555	0.512479	-3.60123	0.000316721	0.0133543
Gh_A08G1537	106.202	-1.83425	0.383081	-4.78816	1.68e-06	0.000371869
Gh_D03G0476	128.742	-1.81224	0.496195	-3.65228	0.000259927	0.0116824
Gh_D02G0768	41.0913	-1.81107	0.511604	-3.53998	0.000400156	0.0154461
Gh_D03G1107	61.5673	-1.79698	0.527586	-3.40605	0.000659105	0.0214064
Gh_A13G1311	39.7199	-1.79549	0.380551	-4.71815	2.38e-06	0.000458572
Gh_A04G1296	112.979	-1.77445	0.525658	-3.37568	0.000736328	0.0229513
Gh_A04G0923	35.2879	-1.76506	0.535596	-3.2955	0.000982471	0.0275988
Gh_D13G2154	50.0095	-1.75547	0.535918	-3.27563	0.00105427	0.0288278
Gh_A05G1705	174.372	-1.75018	0.462125	-3.78724	0.00015233	0.00854545
Gh_A04G0066	46.1478	-1.74917	0.491259	-3.5606	0.000370015	0.014667
Gh_A05G2112	869.544	-1.73803	0.410994	-4.22885	2.35e-05	0.00239954
Gh_A09G0182	45.267	-1.73393	0.436571	-3.97169	7.14e-05	0.00523927
Gh_D05G3625	57.9149	-1.71428	0.421673	-4.06542	4.79e-05	0.00384111
Gh_D04G1220	95.1355	-1.70606	0.461155	-3.69955	0.000215982	0.0105418
Gh_A09G0635	61.6686	-1.69772	0.529194	-3.20812	0.00133604	0.0337625
Gh_A12G0132	188.715	-1.66835	0.253258	-6.58754	4.47e-11	1.34e-07
Gh_D05G3751	64.9125	-1.66755	0.457548	-3.64453	0.000267882	0.0118591
Gh_D05G0627	68.4484	-1.66258	0.404631	-4.10889	3.98e-05	0.0034253
Gh_D01G0480	88.7037	-1.64923	0.410233	-4.02022	5.81e-05	0.00443989
Gh_A09G0337	101.433	-1.62097	0.354164	-4.57688	4.72e-06	0.000766979
Gh_A01G1736	71.5473	-1.61612	0.526113	-3.0718	0.00212769	0.0457899
Gh_D03G1513	197.886	-1.61214	0.489539	-3.29319	0.00099057	0.0276629
Gh_A13G1133	248.175	-1.60005	0.506999	-3.15592	0.00159991	0.0378541
Gh_A02G1131	49.6734	-1.59268	0.315746	-5.04418	4.55e-07	0.000136834
Gh_A07G1489	167.965	-1.59206	0.412551	-3.85906	0.000113824	0.00706963
Gh_A12G0036	145.09	-1.59179	0.275705	-5.77353	7.76e-09	6.56e-06
Gh_D05G2357	272.64	-1.5896	0.361626	-4.39572	1.1e-05	0.00145292
Gh_A09G2408	101.051	-1.58563	0.423459	-3.74448	0.000180768	0.00953206
Gh_D01G0837	37.5174	-1.58273	0.429381	-3.68607	0.000227748	0.0107594
Gh_D04G1399	1086.9	-1.58179	0.476497	-3.31962	0.0009014	0.0262008
Gh_D12G2457	45.3643	-1.57131	0.392895	-3.99931	6.35e-05	0.00476338
Gh_A10G1514	65.4207	-1.5629	0.405728	-3.85208	0.000117117	0.00711564
Gh_A07G0674	51.7849	-1.56102	0.448716	-3.47886	0.000503547	0.0177834
Gh_A02G1344	316.304	-1.5509	0.508983	-3.04705	0.002311	0.0482973
Gh_A10G1990	36.9595	-1.54933	0.449658	-3.44558	0.000569832	0.0192525
Gh_D11G1691	175.442	-1.54864	0.413178	-3.74812	0.000178168	0.00944438
Gh_A03G2006	263.654	-1.52917	0.483735	-3.16118	0.00157129	0.037468
Gh_D04G1509	168.878	-1.51387	0.40136	-3.77187	0.000162031	0.00885048
Gh_D12G1452	490.852	-1.50726	0.431632	-3.492	0.00047941	0.0173058
Gh_D07G0995	94.971	-1.4848	0.408556	-3.63427	0.000278768	0.0122317
Gh_Sca056177G01	113.584	-1.48238	0.353563	-4.1927	2.76e-05	0.00267724
Gh_A03G1988	224.783	-1.46621	0.383228	-3.82594	0.000130276	0.00761706
Gh_A09G2418	2048.95	-1.46618	0.398155	-3.68244	0.000231013	0.0108417
Gh_Sca005221G01	34.1109	-1.46259	0.466334	-3.13636	0.00171062	0.0396114
Gh_A12G0442	57.8925	-1.45623	0.349775	-4.16333	3.14e-05	0.00291949
Gh_D12G0138	199.739	-1.45558	0.326275	-4.46121	8.15e-06	0.0011852
Gh_D08G1701	296.29	-1.45163	0.363533	-3.99312	6.52e-05	0.00487362
Gh_A08G1324	54.8711	-1.4422	0.423152	-3.40822	0.000653871	0.0213122
Gh_A12G2190	91.5112	-1.43826	0.374775	-3.83766	0.000124213	0.00741448
Gh_D12G1704	110.195	-1.4361	0.334965	-4.28733	1.81e-05	0.00201406
Gh_A01G1737	523.578	-1.43434	0.462215	-3.10319	0.00191444	0.0429778
Gh_A08G1406	282.651	-1.43172	0.349028	-4.10202	4.1e-05	0.00348263
Gh_D13G2157	1831.57	-1.42962	0.443237	-3.2254	0.00125797	0.0324541
Gh_D01G1179	37.7945	-1.42778	0.361602	-3.94848	7.86e-05	0.00565571
Gh_A02G0972	77.038	-1.42189	0.397697	-3.57531	0.000349812	0.0141612
Gh_D12G2022	48.4275	-1.42061	0.358001	-3.96816	7.24e-05	0.00527502
Gh_A01G1647	41.501	-1.41769	0.406487	-3.48767	0.000487251	0.0174235
Gh_A03G0247	49.8024	-1.41505	0.465486	-3.03994	0.00236627	0.0490038
Gh_A13G2343	1397.76	-1.41351	0.449139	-3.14715	0.0016487	0.0385993
Gh_A05G0511	110.047	-1.41304	0.366418	-3.85636	0.000115089	0.00706963
Gh_D05G0068	59.8895	-1.40818	0.43694	-3.22283	0.00126933	0.0326083
Gh_D02G0891	933.98	-1.40773	0.46001	-3.06022	0.00221176	0.0468886
Gh_D04G1975	132.104	-1.40266	0.428501	-3.27342	0.00106254	0.0289153
Gh_A01G1931	471.367	-1.38745	0.317342	-4.3721	1.23e-05	0.00156523
Gh_D01G2312	58.8873	-1.38034	0.417595	-3.30545	0.000948231	0.0269763
Gh_D09G0340	103.753	-1.37767	0.316358	-4.35479	1.33e-05	0.00165165
Gh_A10G2145	148	-1.37746	0.363138	-3.7932	0.000148715	0.00839423
Gh_A07G0209	484.937	-1.37332	0.440816	-3.1154	0.00183696	0.0417537
Gh_D11G1301	600.93	-1.37008	0.252218	-5.43215	5.57e-08	2.89e-05
Gh_D01G2311	57.487	-1.36496	0.413663	-3.2997	0.000967898	0.0273165
Gh_A13G1565	484.702	-1.35219	0.435818	-3.10265	0.00191794	0.0429778
Gh_D01G2189	340.68	-1.34724	0.31628	-4.25965	2.05e-05	0.00222611
Gh_Sca053338G01	185.677	-1.34707	0.35479	-3.7968	0.000146574	0.00831449
Gh_A03G1631	692.902	-1.34632	0.438988	-3.06687	0.00216313	0.0462657
Gh_A12G2052	282.855	-1.34516	0.413251	-3.25507	0.00113364	0.0302244
Gh_D05G2983	1484.15	-1.3441	0.419239	-3.20606	0.00134568	0.0338761
Gh_D05G0629	39.5692	-1.34321	0.346493	-3.87659	0.000105931	0.00671835
Gh_D09G1401	707.566	-1.34076	0.274886	-4.87751	1.07e-06	0.00026807
Gh_D13G0511	145.051	-1.33405	0.421011	-3.16869	0.0015313	0.036868
Gh_A09G0410	232.619	-1.33353	0.280241	-4.75852	1.95e-06	0.000397565
Gh_D13G2117	257.382	-1.33104	0.303638	-4.38364	1.17e-05	0.00150909
Gh_D05G2745	706.006	-1.33032	0.133294	-9.98034	1.86e-23	8.49e-19
Gh_A01G2132	398.73	-1.32678	0.425488	-3.11825	0.00181931	0.0414143
Gh_D06G1939	2079.23	-1.3182	0.356704	-3.69549	0.000219461	0.0106498
Gh_A13G0614	115.423	-1.30342	0.350809	-3.71547	0.000202827	0.0102568
Gh_A05G3831	1064.66	-1.30334	0.234536	-5.55711	2.74e-08	1.69e-05
Gh_A07G0558	38.3812	-1.29877	0.420864	-3.08597	0.00202886	0.0445413
Gh_D09G0075	2825.97	-1.29232	0.355947	-3.63067	0.00028269	0.0123558
Gh_A11G3058	111.323	-1.29026	0.350169	-3.68469	0.000228981	0.0107796
Gh_A01G0555	408.546	-1.28424	0.387312	-3.31578	0.000913872	0.0264207
Gh_A01G2133	424.305	-1.2777	0.414782	-3.08041	0.00206715	0.0450991
Gh_D05G0107	48.4908	-1.27686	0.388617	-3.28565	0.00101747	0.0281834
Gh_D10G2391	37.7432	-1.27601	0.411481	-3.10102	0.00192858	0.0431064
Gh_D09G0167	115.943	-1.27285	0.368709	-3.45218	0.000556069	0.0189637
Gh_D11G1631	365.877	-1.27127	0.250535	-5.07422	3.89e-07	0.000121695
Gh_A08G1588	59.8375	-1.27062	0.381206	-3.33316	0.000858664	0.0255108
Gh_D12G0018	97.0461	-1.26891	0.256686	-4.94341	7.68e-07	0.000209916
Gh_A11G1474	152.12	-1.26194	0.28803	-4.38129	1.18e-05	0.00150909
Gh_D04G1035	138.651	-1.25786	0.320612	-3.92331	8.73e-05	0.00601546
Gh_Sca069039G01	472.749	-1.25737	0.365508	-3.44007	0.000581567	0.0195482
Gh_A05G0445	82.9159	-1.25718	0.295115	-4.25997	2.04e-05	0.00222611
Gh_D08G1949	2557.49	-1.25138	0.214798	-5.82588	5.68e-09	5.19e-06
Gh_A10G2012	72.8368	-1.25033	0.308202	-4.05685	4.97e-05	0.003957
Gh_D04G0404	50.2995	-1.24403	0.335522	-3.70776	0.000209099	0.0103673
Gh_A13G1972	337.579	-1.24324	0.386875	-3.21354	0.00131108	0.0333719
Gh_D11G1599	721.025	-1.24235	0.270153	-4.5987	4.25e-06	0.0007138
Gh_A07G1325	51.2795	-1.24091	0.354586	-3.4996	0.000465965	0.0170354
Gh_D10G2032	449.607	-1.23946	0.37408	-3.31335	0.000921844	0.0265752
Gh_D12G0681	90.2194	-1.234	0.397726	-3.10263	0.00191811	0.0429778
Gh_D11G1986	36.2342	-1.23374	0.393086	-3.1386	0.00169758	0.0394496
Gh_D12G2040	180.881	-1.23292	0.404869	-3.04523	0.00232504	0.0484406
Gh_A11G1852	344.533	-1.23037	0.269147	-4.57138	4.85e-06	0.000781821
Gh_A11G1147	1460.28	-1.22789	0.185927	-6.60414	4e-11	1.3e-07
Gh_D02G0586	34.9874	-1.22782	0.337062	-3.64271	0.000269781	0.0119142
Gh_D02G1885	705.472	-1.22692	0.299823	-4.09216	4.27e-05	0.0035678
Gh_A07G0511	407.226	-1.226	0.271171	-4.52114	6.15e-06	0.000952104
Gh_Sca005978G01	326.671	-1.22518	0.294997	-4.15318	3.28e-05	0.00298856
Gh_A09G1100	124.279	-1.22043	0.321401	-3.79722	0.000146327	0.00831078
Gh_A05G0508	93.3513	-1.21186	0.342725	-3.53596	0.000406303	0.0155794
Gh_D11G1273	363.897	-1.20799	0.254552	-4.74557	2.08e-06	0.000409957
Gh_Sca104896G01	40.0947	-1.2076	0.394401	-3.06185	0.00219977	0.0467428
Gh_D09G1782	4373.39	-1.20238	0.314024	-3.82894	0.000128698	0.00757875
Gh_D07G1197	3933.61	-1.20019	0.323331	-3.71196	0.000205663	0.0103421
Gh_D08G0947	67.4402	-1.19746	0.235104	-5.09332	3.52e-07	0.000112354
Gh_A10G1909	71.0261	-1.1971	0.375047	-3.19187	0.00141357	0.035062
Gh_D12G2524	187.83	-1.19465	0.323656	-3.69112	0.000223267	0.0106811
Gh_D07G1002	297.364	-1.18691	0.307235	-3.86321	0.000111907	0.00700016
Gh_A05G3813	405.049	-1.18633	0.315147	-3.76436	0.000166977	0.00903782
Gh_A01G0469	165.668	-1.18226	0.325636	-3.63061	0.000282757	0.0123558
Gh_A04G0620	307.652	-1.18192	0.229903	-5.14093	2.73e-07	9.25e-05
Gh_D13G2156	1610.29	-1.18061	0.329713	-3.58072	0.000342647	0.0140077
Gh_A09G1089	98.9243	-1.17592	0.255202	-4.60779	4.07e-06	0.000688304
Gh_A12G1558	4443.98	-1.17551	0.379162	-3.10029	0.00193333	0.0431493
Gh_D08G2335	72.258	-1.17094	0.367001	-3.19058	0.00141988	0.0351232
Gh_D05G2623	125.261	-1.17054	0.310928	-3.76466	0.000166774	0.00903782
Gh_D12G1564	2093.7	-1.16505	0.356547	-3.26759	0.00108466	0.0293424
Gh_D01G0318	47.078	-1.16374	0.376182	-3.09355	0.00197776	0.0438196
Gh_D13G1652	43.4654	-1.16352	0.31752	-3.66439	0.000247933	0.0113671
Gh_D12G0051	156.769	-1.16261	0.34288	-3.39073	0.000697059	0.0220739
Gh_A11G2645	362.232	-1.15828	0.283144	-4.09079	4.3e-05	0.00358231
Gh_A08G2176	92.9428	-1.15625	0.311565	-3.7111	0.000206357	0.0103421
Gh_A06G1962	3444.55	-1.15524	0.232657	-4.96544	6.85e-07	0.000193493
Gh_A11G1444	412.622	-1.15444	0.238323	-4.84403	1.27e-06	0.000302598
Gh_D06G1395	69.8971	-1.15385	0.270988	-4.25794	2.06e-05	0.00223256
Gh_A01G0119	121.134	-1.15316	0.304758	-3.78386	0.000154414	0.00863056
Gh_D07G1389	107.89	-1.15073	0.350236	-3.28557	0.00101775	0.0281834
Gh_A11G2618	140.037	-1.15001	0.177302	-6.48615	8.81e-11	1.91e-07
Gh_D04G1666	640.397	-1.14333	0.270254	-4.23057	2.33e-05	0.00239239
Gh_D03G0554	102.127	-1.14238	0.360993	-3.16455	0.00155321	0.0371924
Gh_A13G1850	61.6522	-1.14089	0.34647	-3.29289	0.000991631	0.0276629
Gh_A10G1066	33.3139	-1.1372	0.37297	-3.04904	0.00229576	0.0480667
Gh_D13G0021	37.5358	-1.13306	0.300305	-3.77302	0.000161281	0.00884456
Gh_D13G2116	166.819	-1.13211	0.296386	-3.81973	0.000133599	0.00774196
Gh_A05G0051	1160.37	-1.13174	0.37099	-3.05061	0.00228379	0.0479639
Gh_D04G1716	550.406	-1.13127	0.269018	-4.20519	2.61e-05	0.00257839
Gh_D12G2301	740.65	-1.13031	0.35666	-3.16916	0.00152881	0.03684
Gh_A03G1323	85.2723	-1.12947	0.366892	-3.07849	0.00208054	0.0452477
Gh_A13G2057	5425.76	-1.12256	0.325567	-3.44801	0.000564723	0.0191586
Gh_A04G1487	166.411	-1.12199	0.328487	-3.41563	0.000636339	0.0208661
Gh_A04G0483	98.0302	-1.12082	0.365285	-3.06834	0.00215251	0.046125
Gh_A11G3008	768.468	-1.11948	0.264183	-4.23752	2.26e-05	0.00236044
Gh_A01G1193	105.718	-1.11941	0.344703	-3.24747	0.00116435	0.0307868
Gh_A03G1635	804.951	-1.11696	0.253966	-4.39809	1.09e-05	0.00144267
Gh_D10G1036	229.857	-1.11617	0.26048	-4.28504	1.83e-05	0.002025
Gh_D02G1965	1169.98	-1.10953	0.348143	-3.18698	0.00143765	0.0353522
Gh_A05G1715	193.852	-1.10791	0.300628	-3.68531	0.000228427	0.0107702
Gh_D07G1285	199.971	-1.10663	0.298852	-3.70294	0.000213119	0.0104756
Gh_D02G0815	4158.32	-1.10345	0.247495	-4.45849	8.25e-06	0.00119651
Gh_A06G2083	1115.38	-1.10159	0.187931	-5.86167	4.58e-09	4.45e-06
Gh_A10G0241	51.2844	-1.09815	0.30725	-3.57413	0.000351395	0.0142127
Gh_Sca004821G01	39.2217	-1.09793	0.36077	-3.04331	0.00233994	0.048635
Gh_A12G1109	518.941	-1.0965	0.284212	-3.85806	0.000114291	0.00706963
Gh_D09G1098	94.4936	-1.09593	0.223911	-4.89449	9.86e-07	0.000251805
Gh_D03G0926	356.611	-1.0957	0.240964	-4.54716	5.44e-06	0.00086214
Gh_D07G1370	36.6937	-1.09542	0.338581	-3.23532	0.00121505	0.0317596
Gh_A12G1084	41.0956	-1.09485	0.357679	-3.061	0.00220603	0.0468104
Gh_D07G1203	291.31	-1.09236	0.20784	-5.25576	1.47e-07	5.7e-05
Gh_Sca004981G01	48.895	-1.09136	0.282141	-3.86815	0.000109665	0.0068977
Gh_A05G2137	415.262	-1.09125	0.185163	-5.89346	3.78e-09	4.02e-06
Gh_D04G1078	479.697	-1.08951	0.278835	-3.90735	9.33e-05	0.00620341
Gh_A05G0197	147.138	-1.08508	0.263133	-4.1237	3.73e-05	0.0032803
Gh_D13G0457	730.732	-1.08505	0.305511	-3.55158	0.000382923	0.0150093
Gh_A10G1615	86.1928	-1.0791	0.274003	-3.93828	8.21e-05	0.00584642
Gh_A05G3999	1054.36	-1.07411	0.263181	-4.08124	4.48e-05	0.00367903
Gh_D01G0331	361.767	-1.07331	0.299421	-3.5846	0.00033759	0.0139348
Gh_D12G1234	193.744	-1.06627	0.282507	-3.77431	0.000160449	0.00881964
Gh_D05G3936	1739.36	-1.06515	0.19708	-5.40466	6.49e-08	3.22e-05
Gh_A05G3415	161.206	-1.06028	0.252578	-4.19784	2.69e-05	0.00262935
Gh_D08G2557	242.34	-1.05949	0.194886	-5.43648	5.43e-08	2.85e-05
Gh_A05G1472	113.951	-1.05826	0.26186	-4.0413	5.32e-05	0.00414925
Gh_D07G1003	454.388	-1.05709	0.316545	-3.33946	0.0008394	0.0250689
Gh_A05G3401	219.369	-1.05479	0.257244	-4.10035	4.13e-05	0.00349427
Gh_D11G0317	461.327	-1.05455	0.310661	-3.39453	0.000687454	0.0219524
Gh_A05G2114	182.069	-1.0515	0.295434	-3.55918	0.000372012	0.0147333
Gh_A09G1099	364.935	-1.05132	0.313925	-3.34896	0.000811141	0.0244041
Gh_D04G1770	98.5946	-1.04988	0.339715	-3.09048	0.00199835	0.044043
Gh_A12G1852	174.363	-1.04909	0.197646	-5.30792	1.11e-07	4.69e-05
Gh_A12G1327	1429.07	-1.04908	0.27169	-3.8613	0.000112787	0.00704155
Gh_A12G2669	379.462	-1.04725	0.266658	-3.92732	8.59e-05	0.00599299
Gh_A08G2487	66.4778	-1.03699	0.319063	-3.25012	0.00115358	0.0305552
Gh_A05G2356	163.838	-1.03402	0.207659	-4.9794	6.38e-07	0.000182929
Gh_D11G0962	111.198	-1.03368	0.298738	-3.46016	0.000539855	0.0185708
Gh_A03G1595	389.045	-1.02549	0.26772	-3.83046	0.000127906	0.00754762
Gh_A08G0694	572.519	-1.02443	0.278845	-3.67384	0.000238933	0.0111219
Gh_Sca065583G01	212.923	-1.02251	0.2381	-4.29447	1.75e-05	0.00197925
Gh_A03G1707	619.721	-1.02101	0.199155	-5.12669	2.95e-07	9.71e-05
Gh_D02G0888	1058.84	-1.01819	0.19965	-5.09988	3.4e-07	0.000109296
Gh_A04G0258	34.7604	-1.01778	0.273782	-3.71747	0.000201224	0.0102236
Gh_A08G2344	98.5978	-1.01693	0.307014	-3.31231	0.000925299	0.0265908
Gh_A13G1488	494.178	-1.01618	0.179935	-5.64747	1.63e-08	1.18e-05
Gh_A03G1497	3125.82	-1.01561	0.260015	-3.90596	9.39e-05	0.00620341
Gh_D05G1140	441.607	-1.01431	0.177657	-5.70936	1.13e-08	8.93e-06
Gh_A09G1397	603.924	-1.0103	0.264493	-3.81975	0.000133586	0.00774196
Gh_D11G1389	692.914	-1.00787	0.298671	-3.37452	0.000739439	0.0230169
Gh_A12G0793	187.631	-1.00476	0.284211	-3.53527	0.000407361	0.0155794
Gh_D07G0799	57.9039	-1.00045	0.322722	-3.10003	0.00193504	0.0431663
Gh_D09G0370	198.169	1.00119	0.323302	3.09676	0.0019565	0.04356
Gh_D12G2172	803.005	1.00575	0.216055	4.65507	3.24e-06	0.000577711
Gh_D05G0964	292.509	1.01378	0.19024	5.32895	9.88e-08	4.34e-05
Gh_A11G3305	311.716	1.02057	0.296909	3.43731	0.000587521	0.0196546
Gh_A06G1867	118.778	1.02382	0.219519	4.66392	3.1e-06	0.000559947
Gh_D01G0314	51.8552	1.02455	0.335908	3.05008	0.00228783	0.0479887
Gh_A07G1794	301.604	1.0257	0.214229	4.78786	1.69e-06	0.000371869
Gh_A06G1309	2359.28	1.02773	0.213555	4.81247	1.49e-06	0.000343153
Gh_A02G0341	1093.49	1.0289	0.2244	4.58511	4.54e-06	0.000740012
Gh_A07G1741	1414.71	1.03325	0.20083	5.1449	2.68e-07	9.18e-05
Gh_A12G1495	48.3483	1.03719	0.340509	3.04599	0.00231914	0.0484231
Gh_D10G1677	40.1905	1.03962	0.296163	3.51031	0.000447593	0.016634
Gh_D01G2089	622.45	1.04823	0.171887	6.09839	1.07e-09	1.58e-06
Gh_A04G0606	403.627	1.04898	0.220748	4.75193	2.01e-06	0.00040177
Gh_A01G2030	88.8437	1.05436	0.288384	3.65608	0.000256098	0.0116017
Gh_A11G2030	559.554	1.05611	0.247417	4.26856	1.97e-05	0.00215955
Gh_A12G0999	80.0847	1.05979	0.280909	3.77272	0.000161475	0.00884456
Gh_A08G0770	76.8038	1.06148	0.296258	3.58296	0.000339724	0.0139632
Gh_D05G1617	242.638	1.06276	0.311667	3.40994	0.000649779	0.0212243
Gh_A11G0680	46.6796	1.06591	0.310384	3.43417	0.000594364	0.0198411
Gh_A07G0743	111.178	1.06655	0.252179	4.22933	2.34e-05	0.00239954
Gh_D01G0004	111.858	1.0724	0.293708	3.65125	0.000260966	0.011706
Gh_D03G0294	2068.7	1.07566	0.253795	4.23828	2.25e-05	0.00236044
Gh_D13G1471	220.305	1.08755	0.317426	3.42615	0.000612204	0.0203314
Gh_D11G3218	40.065	1.1017	0.363667	3.02942	0.00245021	0.049994
Gh_A03G1329	217.398	1.10308	0.255723	4.31359	1.61e-05	0.00186634
Gh_D09G0145	4785	1.1062	0.127332	8.68751	3.7e-18	5.64e-14
Gh_A10G1435	67.1066	1.11226	0.305056	3.64608	0.000266274	0.0118395
Gh_D11G1232	204.056	1.11426	0.207656	5.36587	8.06e-08	3.68e-05
Gh_A11G2111	359.596	1.13016	0.248778	4.54285	5.55e-06	0.000873892
Gh_A06G0520	1903.77	1.13417	0.196695	5.76613	8.11e-09	6.73e-06
Gh_A13G1177	94.3521	1.1462	0.317163	3.61391	0.000301609	0.0129172
Gh_D09G1508	60.5781	1.14775	0.369394	3.10712	0.00188917	0.0426955
Gh_A07G1265	584.018	1.14903	0.272773	4.21241	2.53e-05	0.00255259
Gh_D06G0576	2582.24	1.15445	0.242005	4.77037	1.84e-06	0.00038521
Gh_A05G1444	263.018	1.1659	0.349558	3.33536	0.000851892	0.0253922
Gh_D02G0206	193.79	1.1702	0.342316	3.41849	0.000629703	0.0207413
Gh_A05G2984	195.14	1.17068	0.272977	4.28859	1.8e-05	0.00200755
Gh_A09G0153	3119.61	1.18583	0.146916	8.07149	6.94e-16	6.34e-12
Gh_A03G0015	72.106	1.20393	0.324653	3.70837	0.000208596	0.0103637
Gh_D07G0756	57.1421	1.21409	0.272712	4.45192	8.51e-06	0.00122594
Gh_A07G1706	398.474	1.21565	0.299091	4.06449	4.81e-05	0.00384958
Gh_D10G1468	50.7814	1.22821	0.388017	3.16536	0.00154891	0.0371283
Gh_D10G0307	3564.46	1.22871	0.139475	8.8095	1.26e-18	2.87e-14
Gh_A07G0355	326.925	1.25915	0.255538	4.92744	8.33e-07	0.000221831
Gh_D12G2293	252.554	1.26018	0.222504	5.66361	1.48e-08	1.11e-05
Gh_D12G2223	1405.67	1.27092	0.261221	4.8653	1.14e-06	0.000277583
Gh_D04G1927	970.181	1.27626	0.355536	3.58969	0.000331076	0.0137564
Gh_D01G0473	35.5947	1.27871	0.396085	3.22837	0.00124498	0.0322644
Gh_D07G2290	37.2547	1.29406	0.281657	4.59445	4.34e-06	0.000720467
Gh_D12G0644	70.824	1.29867	0.335896	3.8663	0.0001105	0.00694066
Gh_A06G1372	61.2335	1.31328	0.283172	4.63776	3.52e-06	0.000611514
Gh_D08G0536	2704.8	1.35117	0.230151	5.87079	4.34e-09	4.31e-06
Gh_A05G3490	461.721	1.35833	0.439544	3.09032	0.00199941	0.044043
Gh_D05G1009	66.5189	1.37012	0.448402	3.05556	0.00224643	0.0474035
Gh_A10G2222	2069.81	1.37471	0.18636	7.37664	1.62e-13	1.24e-09
Gh_D06G1602	184.032	1.38567	0.263798	5.25276	1.5e-07	5.75e-05
Gh_Sca005937G01	43.1226	1.39769	0.318944	4.38224	1.17e-05	0.00150909
Gh_D10G1860	36.3401	1.39872	0.457541	3.05704	0.00223533	0.0472565
Gh_A05G1934	755.551	1.40429	0.259648	5.40842	6.36e-08	3.22e-05
Gh_A13G0231	621.85	1.4227	0.351379	4.04889	5.15e-05	0.00405319
Gh_D10G2266	106.145	1.43013	0.44887	3.18605	0.00144227	0.0354467
Gh_A08G0449	152.547	1.45395	0.401464	3.62161	0.00029277	0.0126362
Gh_D01G0003	194.203	1.46422	0.297617	4.91981	8.66e-07	0.000227349
Gh_A10G0065	100.954	1.46461	0.373247	3.92398	8.71e-05	0.00601546
Gh_D13G0247	988.72	1.47173	0.267283	5.50627	3.67e-08	2.2e-05
Gh_D10G0069	109.343	1.48797	0.350557	4.24459	2.19e-05	0.00233219
Gh_A07G2295	33.6507	1.49897	0.477845	3.13694	0.00170721	0.0395926
Gh_A09G1704	179.91	1.51339	0.305	4.96194	6.98e-07	0.000194328
Gh_D13G2544	82.23	1.51633	0.428324	3.54015	0.000399893	0.0154461
Gh_D13G0232	72.6092	1.54017	0.379861	4.05457	5.02e-05	0.00398878
Gh_D10G0149	73.1026	1.54176	0.330754	4.66136	3.14e-06	0.000564731
Gh_D12G1275	136.623	1.55999	0.445452	3.50204	0.000461712	0.0169224
Gh_Sca017354G01	201.798	1.56052	0.370826	4.20822	2.57e-05	0.00256838
Gh_D05G2165	502.394	1.56438	0.279006	5.607	2.06e-08	1.31e-05
Gh_D07G2090	157.01	1.5676	0.332842	4.70976	2.48e-06	0.000471878
Gh_D08G1225	68.0989	1.5979	0.335986	4.75586	1.98e-06	0.00040103
Gh_A03G1639	196.185	1.60015	0.364624	4.3885	1.14e-05	0.00148908
Gh_A08G2422	123.857	1.60161	0.331705	4.82842	1.38e-06	0.000322268
Gh_D05G3929	699.492	1.61508	0.442318	3.65139	0.000260824	0.011706
Gh_A11G0237	39.3295	1.61652	0.439161	3.68092	0.000232391	0.0108952
Gh_A02G0964	197.358	1.62008	0.233293	6.9444	3.8e-12	1.93e-08
Gh_A01G0276	309.209	1.65159	0.382625	4.31646	1.59e-05	0.00185168
Gh_D06G0778	337.062	1.67008	0.295354	5.65452	1.56e-08	1.15e-05
Gh_A06G1277	92.518	1.67857	0.289088	5.80643	6.38e-09	5.71e-06
Gh_A11G2110	892.998	1.69538	0.251952	6.72896	1.71e-11	6.5e-08
Gh_D12G0048	135.895	1.71981	0.398953	4.31082	1.63e-05	0.00188512
Gh_A11G1986	477.14	1.92117	0.336717	5.70561	1.16e-08	8.97e-06
Gh_A05G0131	69.6927	2.11901	0.536839	3.94719	7.91e-05	0.00567737
Gh_D05G0192	444.257	2.25233	0.52	4.33141	1.48e-05	0.00177575
Gh_D05G0193	37.6975	2.31619	0.533352	4.3427	1.41e-05	0.00171838
Gh_D11G1996	738.071	2.45069	0.397968	6.158	7.37e-10	1.2e-06
Gh_A05G0130	148.55	2.50063	0.535295	4.6715	2.99e-06	0.000546162
