# Supplementary material
Source: Preprints.org preprint supplement (doi:10.20944/preprints201908.0280.v1)

a)

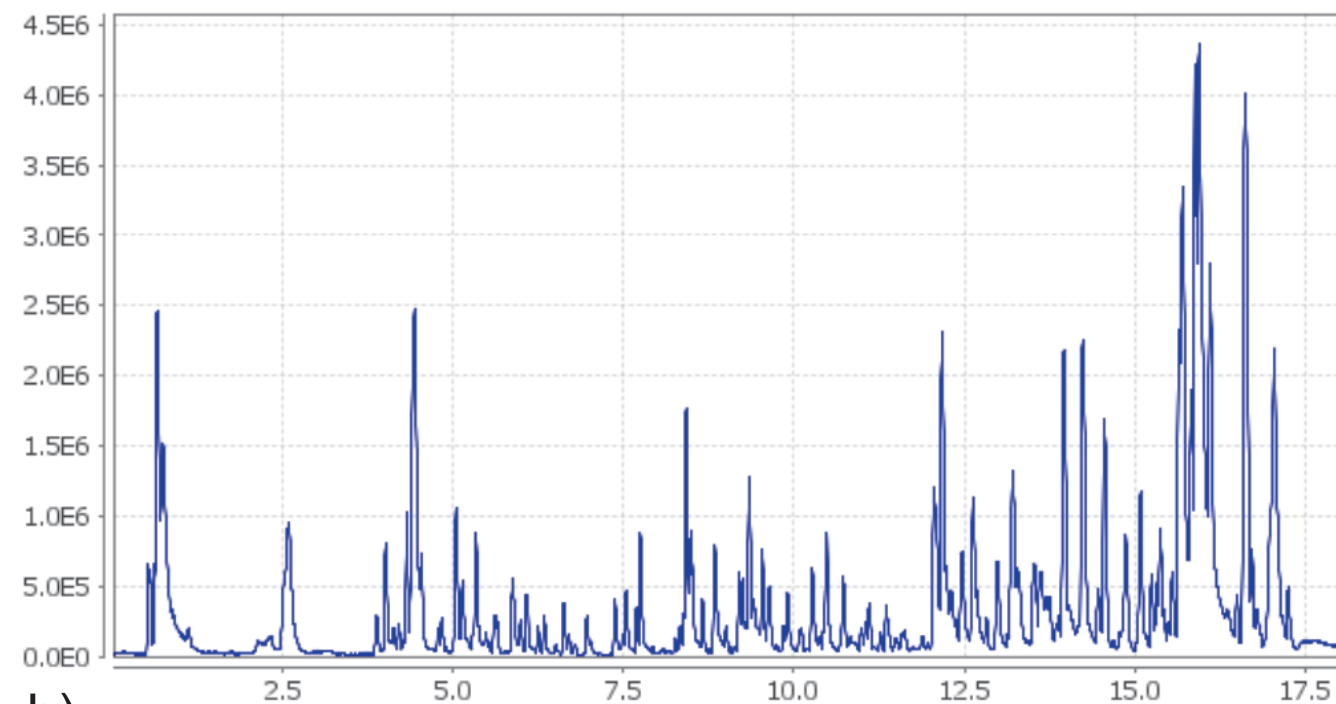

b)

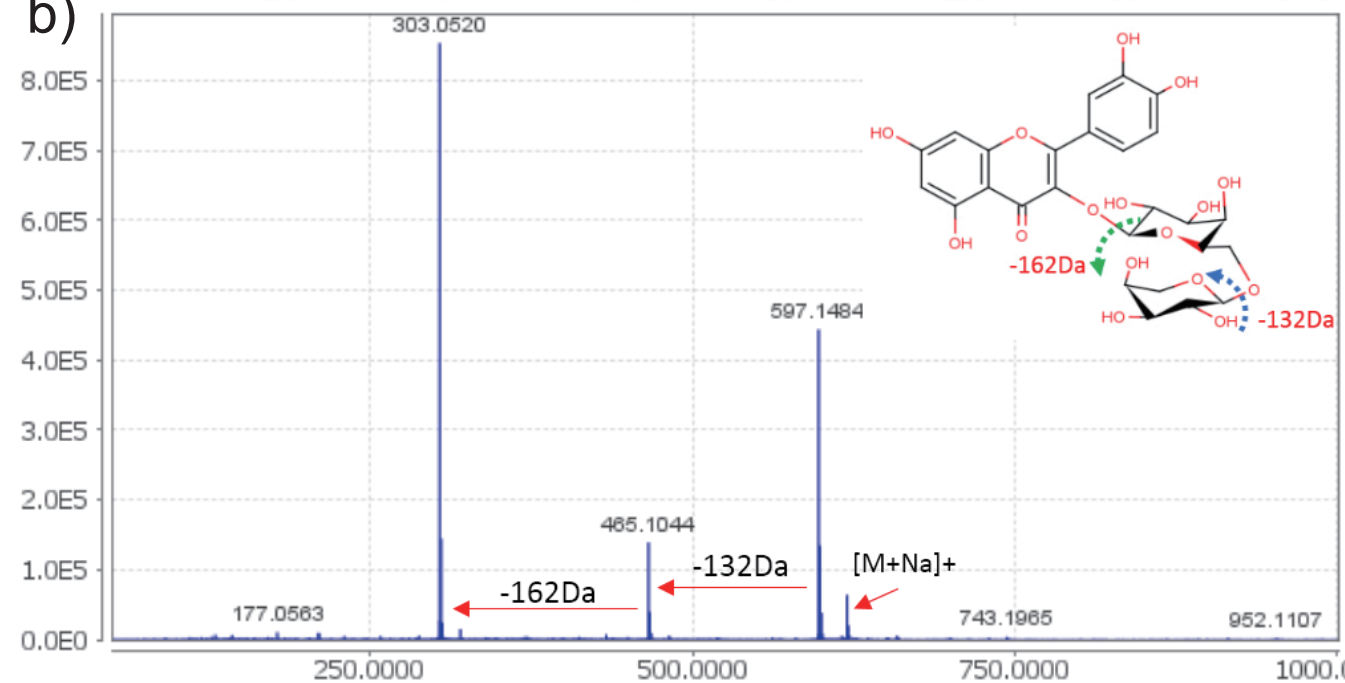

c)

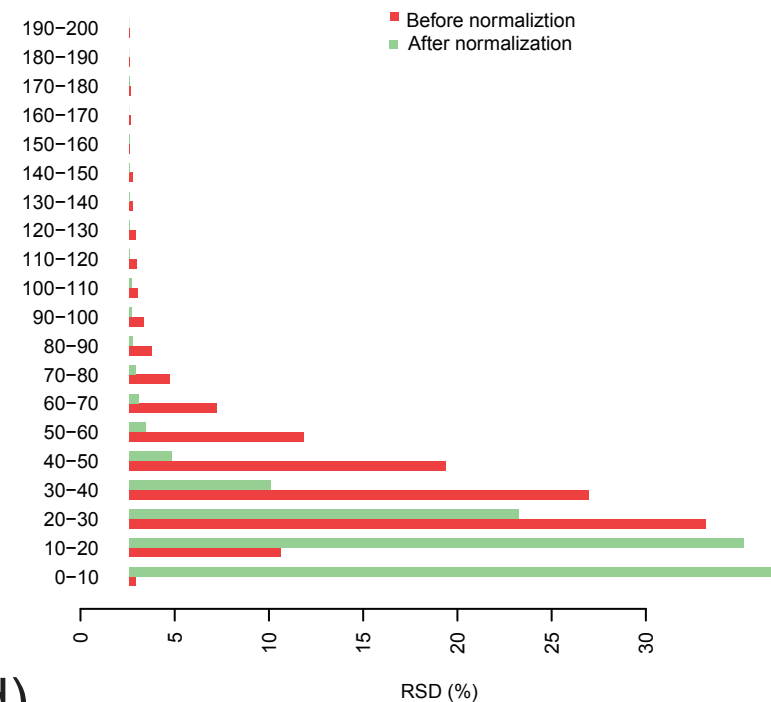

d)

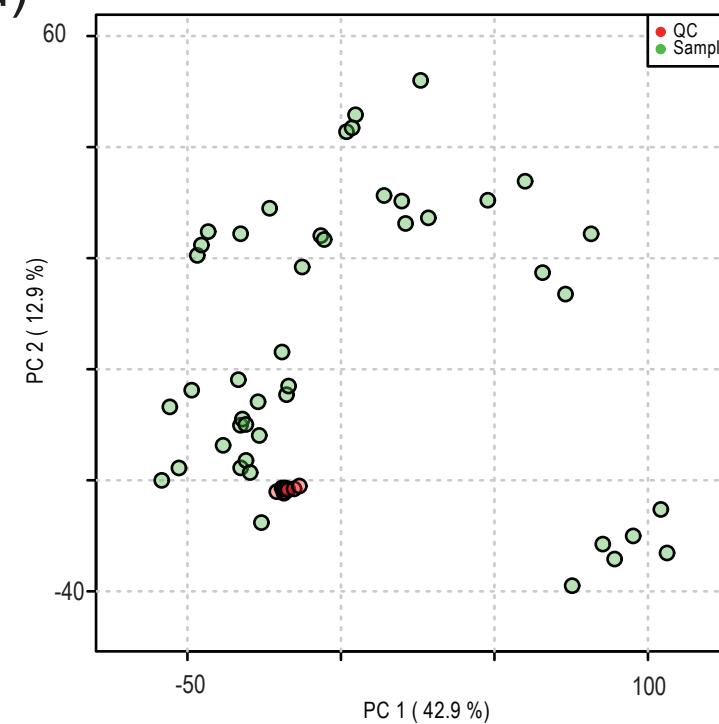

Supplement: Supplementary file 1 [file supplementary]

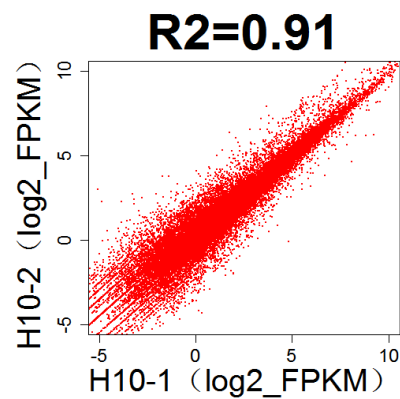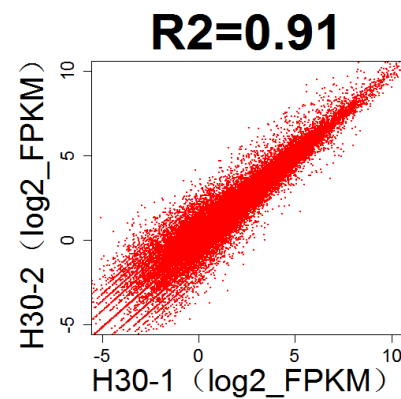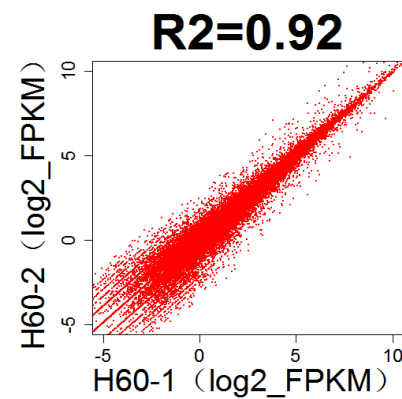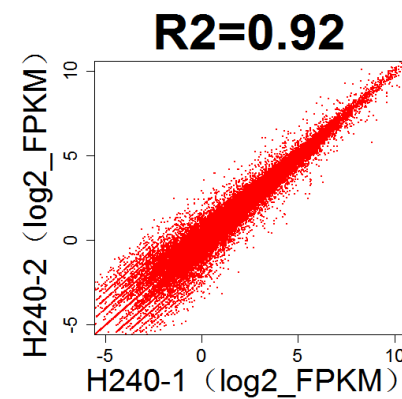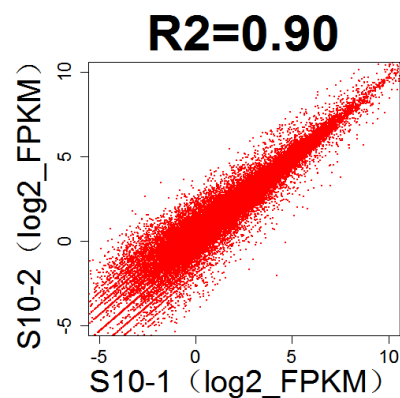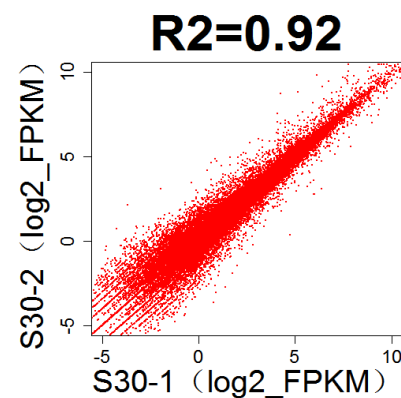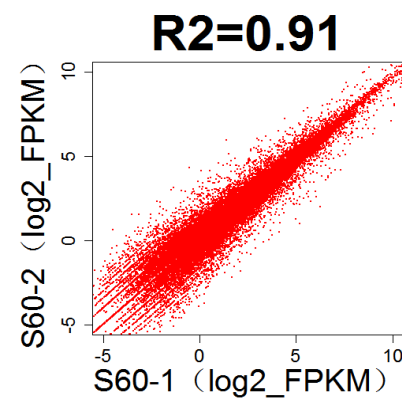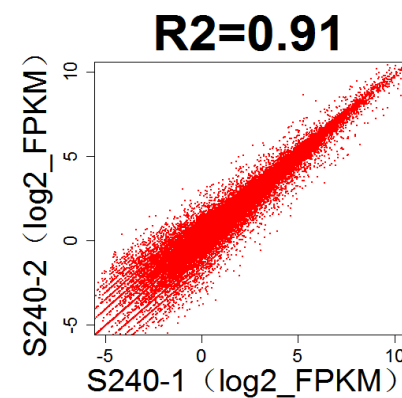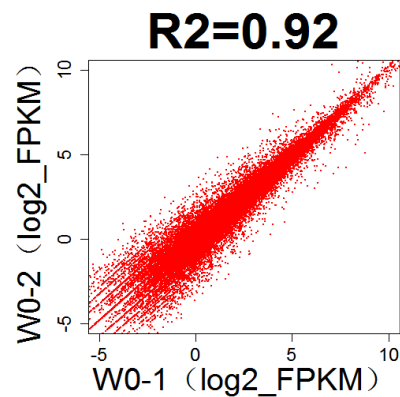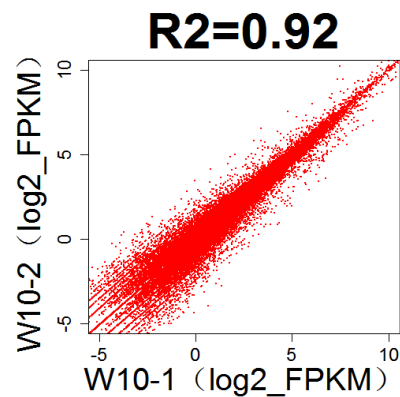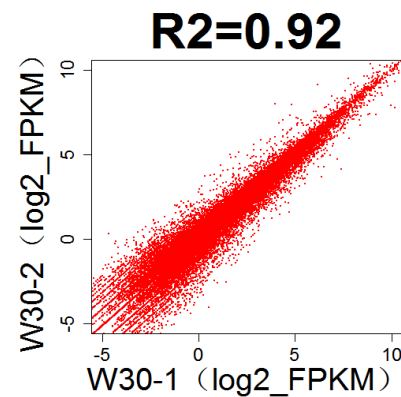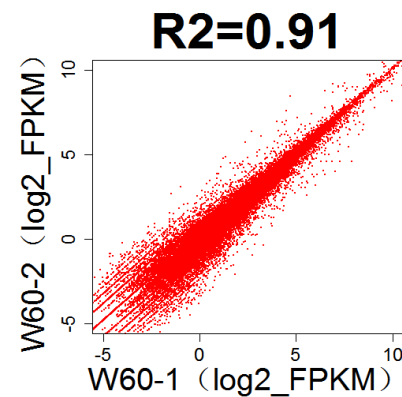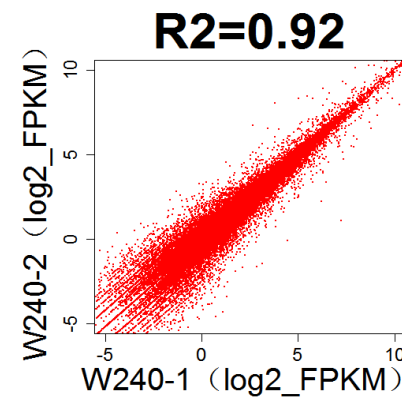

Supplement: Supplementary file 2 [file supplementary]
